# Supplementary material
Source: HighWire-hosted journal article supplement (doi:10.1101/rna.081061.126)
Supplement: Supplemental_Table_S1.xlsx [file Supplemental_Table_S1.xlsx]

## Sheet: Ctrl_SERIPH2nd-vs-1st-Exon
Gene ID	Transcript ID	baseMean	log2FoldChange	lfcSE	stat	pvalue	padj
ENSG00000000003.17	ENST00000966005.1	391.94	-3.16926	0.190727	-16.6167	5.27473e-62	1.04088e-60
ENSG00000000419.15	ENST00000684628.1	257.397	-0.617958	0.219388	-2.81673	0.00485149	0.00903363
ENSG00000000457.15	ENST00000367771.11	264.22	-0.752819	0.225821	-3.3337	0.000856999	0.0017589
ENSG00000000460.18	ENST00000496973.5	211.954	-0.792439	0.20052	-3.95192	7.75267e-05	0.00017771
ENSG00000000938.14	ENST00000475472.5	9.00656	1.70562	2.23557	0.762948	0.445495	0.542037
ENSG00000001036.15	ENST00000367585.1	154.059	-1.82355	0.268048	-6.80309	1.02402e-11	3.81351e-11
ENSG00000001167.16	ENST00000914467.1	576.691	-1.31781	0.126875	-10.3867	2.85041e-25	1.90744e-24
ENSG00000001460.19	ENST00000483261.1	12.4745	-0.984737	0.730096	-1.34878	0.177408	0.24591
ENSG00000001461.20	ENST00000488155.1	51.0319	-0.348624	0.366429	-0.95141	0.341396	0.434595
ENSG00000001497.19	ENST00000469091.1	116.157	1.09811	0.234566	4.68146	2.84845e-06	7.40491e-06
ENSG00000001561.8	ENST00000962954.1	161.718	-2.90224	0.299355	-9.69498	3.16686e-22	1.90323e-21
ENSG00000001617.13	ENST00000420831.1	157.142	0.582881	0.392211	1.48614	0.137241	0.196386
ENSG00000001626.19	ENST00000436097.2	14.164	0.26279	2.18614	0.120207	0.904319	0.948885
ENSG00000001629.11	ENST00000486698.1	8.72741	1.20309	0.794982	1.51336	0.130189	0.18744
ENSG00000001630.19	ENST00000482924.1	196.927	-2.46303	0.226888	-10.8557	1.87407e-27	1.3539e-26
ENSG00000001631.18	ENST00000466166.1	91.5347	0.785739	0.353253	2.2243	0.0261285	0.0434092
ENSG00000002016.19	ENST00000542297.1	15.8825	0.721207	0.588485	1.22553	0.220375	0.297554
ENSG00000002330.15	ENST00000493798.1	30.9324	-2.524	0.547648	-4.6088	4.05009e-06	1.03919e-05
ENSG00000002549.14	ENST00000508014.5	82.8031	-2.02124	0.310872	-6.50182	7.93557e-11	2.81622e-10
ENSG00000002587.11	ENST00000952065.1	2.13172	-0.743915	2.17129	-0.342614	0.731889	0.810011
ENSG00000002745.13	ENST00000361301.6	149.946	-3.64418	1.50403	-2.42294	0.0153956	0.0265985
ENSG00000002746.16	ENST00000493057.1	10.906	1.38254	0.709132	1.94962	0.051221	0.0807413
ENSG00000002834.20	ENST00000433206.6	915.403	-1.54983	0.149166	-10.39	2.75396e-25	1.84356e-24
ENSG00000002919.16	ENST00000577310.1	13.4646	-0.581249	0.621059	-0.935899	0.349325	0.443297
ENSG00000003056.9	ENST00000544193.1	193.478	-2.81612	0.221714	-12.7016	5.79369e-37	5.71357e-36
ENSG00000003096.16	ENST00000881391.1	2361.57	2.7545	0.123813	22.2472	1.19973e-109	5.72731e-108
ENSG00000003137.9	ENST00000412253.1	51.5121	-1.11471	0.453344	-2.45885	0.0139382	0.0242373
ENSG00000003147.20	ENST00000476942.1	0.585318	1.26811	3.73503	0.33952	0.734218	0.812218
ENSG00000003249.16	ENST00000623401.1	271.711	-2.96189	0.226191	-13.0946	3.5342e-39	3.78233e-38
ENSG00000003393.17	ENST00000679503.1	203.229	-0.304885	0.22327	-1.36554	0.172082	0.239383
ENSG00000003400.17	ENST00000484926.1	3.21583	-0.587026	1.32724	-0.442292	0.658278	0.743181
ENSG00000003402.22	ENST00000490965.1	3.4739	-0.441944	1.12327	-0.393443	0.693992	0.77585
ENSG00000003436.17	ENST00000971372.1	138.41	-1.50671	0.263325	-5.72184	1.05375e-08	3.27044e-08
ENSG00000003509.17	ENST00000474257.5	88.1955	0.230366	0.327815	0.702731	0.482223	0.578192
ENSG00000003987.15	ENST00000518272.5	11.7178	2.07164	0.708894	2.92235	0.00347399	0.0066048
ENSG00000003989.19	ENST00000398090.3	1087.06	-1.61518	0.134593	-12.0005	3.53176e-33	3.09604e-32
ENSG00000004059.12	ENST00000864451.1	664.927	-4.1228	0.251597	-16.3865	2.3864e-60	4.4955e-59
ENSG00000004142.13	ENST00000902298.1	1419.09	-2.64885	0.150625	-17.5858	3.1676e-69	7.28019e-68
ENSG00000004399.14	ENST00000511018.1	46.2314	-1.72007	0.402436	-4.27413	1.91885e-05	4.64292e-05
ENSG00000004455.19	ENST00000466029.1	870.22	-1.07016	0.14991	-7.1387	9.42202e-13	3.71299e-12
ENSG00000004468.14	ENST00000510674.1	39.3042	-0.737106	1.80121	-0.409229	0.682372	0.765191
ENSG00000004478.9	ENST00000539181.1	258.966	-3.19327	0.202649	-15.7577	6.08421e-56	1.03823e-54
ENSG00000004487.19	ENST00000602503.1	282.447	-1.87064	0.183519	-10.1932	2.12713e-24	1.38636e-23
ENSG00000004534.16	ENST00000478026.1	54.4679	1.66681	0.311031	5.35898	8.36952e-08	2.43877e-07
ENSG00000004660.16	ENST00000158166.5	687.673	1.05867	0.183301	5.77557	7.66941e-09	2.40139e-08
ENSG00000004700.17	ENST00000965024.1	592.458	-1.62833	0.143908	-11.3151	1.105e-29	8.66487e-29
ENSG00000004766.18	ENST00000476413.1	33.2381	0.755401	0.4331	1.74417	0.0811287	0.122494
ENSG00000004776.14	ENST00000592984.6	4.24711	-0.325928	1.40316	-0.232281	0.81632	0.884911
ENSG00000004777.19	ENST00000586918.1	5.28611	0.840498	1.68821	0.497862	0.618581	0.707313
ENSG00000004779.11	ENST00000882848.1	408.363	-0.566828	0.20226	-2.80248	0.0050712	0.00941317
ENSG00000004799.9	ENST00000473301.1	2.29409	-4.34049	2.17434	-1.99623	0.0459087	0.0730759
ENSG00000004809.15	ENST00000460159.1	3.7472	0.26279	2.48975	0.105549	0.91594	0.949376
ENSG00000004838.15	ENST00000475688.1	21.7518	0.478516	0.703882	0.679824	0.496616	0.592
ENSG00000004846.17	ENST00000441315.1	1.79425	-1.17649	2.64367	-0.445021	0.656305	0.741302
ENSG00000004864.15	ENST00000494085.1	133.387	-3.78471	0.348463	-10.8611	1.76532e-27	1.2765e-26
ENSG00000004866.23	ENST00000464020.1	62.2519	-1.44015	0.372225	-3.86903	0.000109267	0.000246887
ENSG00000004897.13	ENST00000576484.1	592.676	-0.0661687	0.261383	-0.253148	0.800154	0.870897
ENSG00000004939.16	ENST00000498270.1	90.837	3.70552	1.63086	2.27213	0.0230787	0.0387274
ENSG00000004948.17	ENST00000887175.1	18.6652	1.78919	0.743456	2.40659	0.0161022	0.0277346
ENSG00000004961.16	ENST00000911475.1	248.366	-3.17101	0.222747	-14.2359	5.48591e-46	7.08606e-45
ENSG00000005001.11	ENST00000574768.5	3.96716	0.26279	2.77468	0.0947102	0.924545	0.951441
ENSG00000005007.15	ENST00000594243.1	83.0734	-1.04077	0.309352	-3.36436	0.000767224	0.00158278
ENSG00000005020.14	ENST00000490456.6	832.939	2.68137	0.157609	17.0128	6.59632e-65	1.39285e-63
ENSG00000005022.7	ENST00000463551.1	743.731	-5.63576	0.239675	-23.5141	2.92291e-122	1.71454e-120
ENSG00000005059.17	ENST00000494604.1	65.065	-2.48195	0.391911	-6.33293	2.40543e-10	8.31131e-10
ENSG00000005073.6	ENST00000517402.1	187.056	-4.51213	0.310669	-14.5239	8.54774e-48	1.16953e-46
ENSG00000005100.13	ENST00000225296.8	1712	-0.667082	0.0767622	-8.69023	3.61691e-18	1.84288e-17
ENSG00000005102.15	ENST00000318579.9	29.3891	0.138129	0.548152	0.25199	0.801049	0.871751
ENSG00000005108.17	ENST00000408005.2	5.49118	-1.74212	1.91269	-0.910819	0.362391	0.457731
ENSG00000005156.13	ENST00000585370.1	65.9823	-0.621786	0.305969	-2.03219	0.0421349	0.0674973
ENSG00000005175.11	ENST00000548296.1	88.7347	-1.72747	0.381005	-4.53399	5.78796e-06	1.46629e-05
ENSG00000005187.13	ENST00000563914.1	6.41602	-1.98251	1.13708	-1.74351	0.0812445	0.122613
ENSG00000005189.21	ENST00000563045.1	10.0229	0.0895482	0.717979	0.124723	0.900743	0.948885
ENSG00000005194.16	ENST00000564885.1	33.6209	-1.24731	0.47314	-2.63623	0.0083832	0.0150943
ENSG00000005206.18	ENST00000587851.1	311.734	1.59837	0.203092	7.87021	3.54058e-15	1.58472e-14
ENSG00000005238.21	ENST00000903802.1	17.1621	-1.49425	0.75471	-1.9799	0.0477147	0.0757312
ENSG00000005243.11	ENST00000580409.5	5.60816	1.70562	2.2352	0.763074	0.445419	0.541963
ENSG00000005249.15	ENST00000706593.1	111.421	-2.93845	0.368927	-7.96485	1.65428e-15	7.52625e-15
ENSG00000005302.19	ENST00000494268.1	73.4546	-2.00657	0.37039	-5.41745	6.04564e-08	1.77788e-07
ENSG00000005339.15	ENST00000575237.2	209.146	-1.35516	0.231999	-5.8412	5.18266e-09	1.64258e-08
ENSG00000005436.15	ENST00000470503.1	215.886	-0.257184	0.212198	-1.212	0.225513	0.303527
ENSG00000005448.18	ENST00000482605.1	52.2532	-2.88288	0.446397	-6.45811	1.06019e-10	3.73367e-10
ENSG00000005469.13	ENST00000469785.1	3.18278	0.7418	1.30634	0.567845	0.57014	0.663381
ENSG00000005471.20	ENST00000467983.1	2.07568	-1.33554	2.30944	-0.578294	0.563066	0.657014
ENSG00000005483.23	ENST00000496191.1	69.3107	-0.1294	0.384172	-0.336827	0.736247	0.813954
ENSG00000005486.18	ENST00000428119.1	230.786	-1.46101	0.238488	-6.12615	9.00332e-10	3.00926e-09
ENSG00000005513.11	ENST00000711628.1	104.598	-2.19615	0.419542	-5.23462	1.65323e-07	4.72433e-07
ENSG00000005700.16	ENST00000508381.1	112.391	-1.13022	0.279597	-4.04231	5.29281e-05	0.000123107
ENSG00000005801.19	ENST00000529789.5	272.717	1.07323	0.166454	6.4476	1.13635e-10	3.99516e-10
ENSG00000005810.21	ENST00000485061.2	328.319	-0.646977	0.187841	-3.44429	0.000572568	0.00119843
ENSG00000005812.12	ENST00000885164.1	1462.09	-0.869354	0.151978	-5.72027	1.06354e-08	3.29942e-08
ENSG00000005844.20	ENST00000564632.1	29.3633	1.70545	2.08672	0.817287	0.413765	0.510924
ENSG00000005882.13	ENST00000506242.5	87.7021	-2.61159	0.346131	-7.54508	4.51995e-14	1.90282e-13
ENSG00000005884.19	ENST00000514834.1	20.1164	-1.99607	0.650704	-3.06755	0.00215822	0.00421918
ENSG00000005889.17	ENST00000480195.1	713.533	1.77237	0.126063	14.0594	6.74633e-45	8.46079e-44
ENSG00000005893.18	ENST00000486593.5	637.979	-1.24449	0.16271	-7.64853	2.03297e-14	8.72516e-14
ENSG00000005961.20	ENST00000592944.1	38.8067	0.347577	0.633041	0.54906	0.582964	0.674687
ENSG00000006007.13	ENST00000563645.1	235.51	-4.0092	0.261466	-15.3335	4.56417e-53	7.19479e-52
ENSG00000006015.19	ENST00000595490.1	84.157	0.818123	0.281996	2.90119	0.00371746	0.0070376
ENSG00000006016.13	ENST00000596360.1	4.13631	-2.19587	1.45071	-1.51366	0.130113	0.18735
ENSG00000006025.14	ENST00000578461.1	7.09192	-0.50883	1.08242	-0.470084	0.638295	0.724986
ENSG00000006042.13	ENST00000583437.2	91.3414	-2.2556	0.366754	-6.15018	7.73956e-10	2.59674e-09
ENSG00000006062.19	ENST00000586644.2	82.5665	-0.0866251	0.275226	-0.314742	0.752957	0.828568
ENSG00000006071.16	ENST00000526037.6	2.64046	3.70547	2.10032	1.76425	0.0776905	0.11781
ENSG00000006116.5	ENST00000876789.1	24.2477	3.29021	1.73998	1.89094	0.0586324	0.0913295
ENSG00000006125.19	ENST00000938755.1	4149.74	-0.452696	0.0877354	-5.15979	2.47224e-07	6.96892e-07
ENSG00000006128.13	ENST00000495916.1	1.69903	-1.32772	2.71124	-0.48971	0.624339	0.712393
ENSG00000006194.12	ENST00000219069.6	301.574	-2.07058	0.17341	-11.9404	7.29091e-33	6.33492e-32
ENSG00000006210.7	ENST00000565912.1	7.38304	-3.17592	1.80916	-1.75547	0.0791797	0.119853
ENSG00000006283.18	ENST00000506520.1	27.3701	1.31767	0.70119	1.87919	0.0602185	0.0935574
ENSG00000006327.15	ENST00000574699.1	10.407	-1.79596	0.897875	-2.00024	0.0454747	0.0724423
ENSG00000006377.11	ENST00000518156.3	48.5521	-1.19612	0.381391	-3.1362	0.00171154	0.0033877
ENSG00000006432.17	ENST00000933971.1	404.299	0.0654851	0.130113	0.503295	0.614757	0.703696
ENSG00000006451.9	ENST00000436179.1	594.913	1.53643	0.129379	11.8754	1.58859e-32	1.36795e-31
ENSG00000006453.15	ENST00000480580.1	94.9356	0.398531	0.383313	1.0397	0.298478	0.386896
ENSG00000006459.12	ENST00000478996.1	62.9035	-1.80792	0.382459	-4.72711	2.27743e-06	5.97093e-06
ENSG00000006468.16	ENST00000433547.1	1.38369	-3.50493	2.24476	-1.56138	0.118434	0.172514
ENSG00000006530.19	ENST00000494053.1	152.159	-0.832279	0.198692	-4.18879	2.8044e-05	6.69084e-05
ENSG00000006534.18	ENST00000616697.1	8.31638	-1.05207	1.56423	-0.672583	0.501212	0.596472
ENSG00000006576.18	ENST00000470215.1	247.512	1.02125	0.27088	3.77011	0.000163178	0.000361903
ENSG00000006606.9	ENST00000394905.2	3.98033	2.2604	1.99254	1.13443	0.256615	0.340179
ENSG00000006607.15	ENST00000413432.2	858.963	-0.913495	0.109832	-8.31717	9.00894e-17	4.33847e-16
ENSG00000006611.18	ENST00000624811.1	5.93067	-2.5446	1.30188	-1.95456	0.0506349	0.0799151
ENSG00000006625.19	ENST00000426081.5	156.595	-1.54979	0.246666	-6.28295	3.32209e-10	1.13839e-09
ENSG00000006634.9	ENST00000495067.1	104.737	-2.21189	0.282398	-7.83254	4.78127e-15	2.12539e-14
ENSG00000006638.14	ENST00000589966.1	36.8442	-2.62344	0.618671	-4.24045	2.23073e-05	5.36683e-05
ENSG00000006652.15	ENST00000417662.1	59.2699	-1.38132	0.461133	-2.99548	0.00274012	0.00527903
ENSG00000006695.13	ENST00000429152.6	97.5515	-1.61383	0.256737	-6.2859	3.25957e-10	1.11748e-09
ENSG00000006704.12	ENST00000486086.1	49.9862	-0.449922	0.417874	-1.0767	0.281616	0.36806
ENSG00000006712.16	ENST00000598127.1	392.315	-2.79466	0.251908	-11.094	1.34203e-28	1.01349e-27
ENSG00000006715.17	ENST00000490924.1	31.69	-1.97956	0.48606	-4.07266	4.64799e-05	0.000108724
ENSG00000006740.19	ENST00000581437.1	67.9905	-0.0188213	0.343811	-0.0547431	0.956343	0.969223
ENSG00000006744.20	ENST00000476042.1	362.863	-0.852013	0.149173	-5.71156	1.11946e-08	3.4673e-08
ENSG00000006747.16	ENST00000476649.1	1.77735	1.01374	2.1137	0.479604	0.631509	0.719019
ENSG00000006757.13	ENST00000889418.1	96.298	-0.940069	0.251109	-3.74367	0.000181349	0.00040039
ENSG00000006831.11	ENST00000537190.1	61.8223	-1.76728	0.339644	-5.20333	1.95751e-07	5.56616e-07
ENSG00000006837.12	ENST00000522501.1	254.027	1.87167	0.164291	11.3924	4.56017e-30	3.61938e-29
ENSG00000007001.15	ENST00000715224.1	5.91404	0.26279	2.29014	0.114749	0.908644	0.948885
ENSG00000007038.12	ENST00000577043.1	36.7043	1.70551	2.08332	0.818654	0.412984	0.510178
ENSG00000007062.13	ENST00000511270.1	0.832199	-1.17495	3.45652	-0.339923	0.733914	0.811925
ENSG00000007080.12	ENST00000597436.5	373.681	-1.69221	0.252175	-6.71044	1.94043e-11	7.1137e-11
ENSG00000007129.19	ENST00000967641.1	2.80475	-2.75182	2.30918	-1.19169	0.233384	0.312869
ENSG00000007168.16	ENST00000610190.2	1166.44	-1.54374	0.105431	-14.6422	1.51016e-48	2.10795e-47
ENSG00000007171.20	ENST00000697340.1	23.7114	-0.822123	0.567165	-1.44953	0.14719	0.208691
ENSG00000007202.17	ENST00000577261.1	751.136	-1.16623	0.122291	-9.53655	1.47661e-21	8.63883e-21
ENSG00000007216.17	ENST00000541739.6	10.0823	0.26279	2.19022	0.119983	0.904496	0.948885
ENSG00000007237.20	ENST00000580865.5	44.6774	-1.57889	0.471802	-3.34651	0.000818368	0.00168386
ENSG00000007255.11	ENST00000587818.1	44.4767	1.0481	0.42581	2.46143	0.0138385	0.0240774
ENSG00000007264.16	ENST00000588983.5	226.199	0.161481	0.307622	0.524932	0.59963	0.689629
ENSG00000007306.16	ENST00000599715.1	145.139	0.26279	2.05797	0.127694	0.898391	0.948885
ENSG00000007312.15	ENST00000559358.1	8.62844	-2.76212	1.92707	-1.43333	0.151764	0.214448
ENSG00000007314.12	ENST00000584310.1	6.26163	-1.18338	2.42913	-0.487162	0.626143	0.714036
ENSG00000007341.20	ENST00000498383.5	203.595	-0.311364	0.182965	-1.70177	0.0887985	0.132943
ENSG00000007372.25	ENST00000532916.5	75.2204	-1.78681	0.401318	-4.45235	8.4934e-06	2.11915e-05
ENSG00000007376.9	ENST00000561734.5	184.809	-2.14112	0.319443	-6.70267	2.0464e-11	7.4943e-11
ENSG00000007384.16	ENST00000493647.1	69.5871	0.715353	0.560663	1.27591	0.201989	0.275967
ENSG00000007392.18	ENST00000467552.1	131.939	1.05264	0.250067	4.20941	2.56035e-05	6.12999e-05
ENSG00000007402.13	ENST00000483620.1	55.493	-1.32491	0.42187	-3.14056	0.00168628	0.00333978
ENSG00000007516.16	ENST00000561602.1	4.92762	1.26542	2.07473	0.609918	0.541916	0.63648
ENSG00000007520.5	ENST00000566296.1	100.983	-2.66824	0.285664	-9.34048	9.5896e-21	5.43303e-20
ENSG00000007541.18	ENST00000537901.1	34.1193	-0.0554791	0.421929	-0.131489	0.895388	0.948885
ENSG00000007545.17	ENST00000467286.1	48.4541	0.447313	0.357179	1.25235	0.210442	0.286084
ENSG00000007908.16	ENST00000609271.1	35.6592	1.26333	1.8079	0.698787	0.484685	0.580604
ENSG00000007923.18	ENST00000689169.1	426.856	-1.22039	0.186738	-6.53527	6.34948e-11	2.26621e-10
ENSG00000007933.14	ENST00000534514.1	4.106	1.70523	2.60096	0.655615	0.512072	0.607356
ENSG00000007944.16	ENST00000356840.8	742.592	-0.884314	0.157034	-5.63137	1.78787e-08	5.46101e-08
ENSG00000007968.8	ENST00000487237.1	88.0005	-0.774573	0.295505	-2.62118	0.0087625	0.0157325
ENSG00000008018.10	ENST00000920418.1	1508.73	-1.11938	0.119634	-9.35666	8.22941e-21	4.67369e-20
ENSG00000008056.15	ENST00000640721.1	24.2171	-2.7609	1.76273	-1.56627	0.117286	0.171036
ENSG00000008083.15	ENST00000930276.1	2625.16	1.53582	0.0726686	21.1345	3.83082e-99	1.56842e-97
ENSG00000008086.13	ENST00000624953.1	198.171	4.18254	0.251626	16.6221	4.82536e-62	9.53571e-61
ENSG00000008128.24	ENST00000495016.5	28.0157	-0.119797	0.454018	-0.263861	0.791887	0.863784
ENSG00000008130.16	ENST00000497747.5	60.8565	-0.105192	0.345236	-0.304695	0.760598	0.835545
ENSG00000008226.21	ENST00000478428.1	6.90715	0.264322	2.24179	0.117907	0.906141	0.948885
ENSG00000008256.18	ENST00000466543.1	28.3084	-0.723201	0.415851	-1.73909	0.0820193	0.12369
ENSG00000008277.16	ENST00000476330.1	32.0209	0.452459	0.403876	1.12029	0.262589	0.347012
ENSG00000008282.11	ENST00000460770.1	159.046	-3.51649	0.287093	-12.2486	1.70847e-34	1.56997e-33
ENSG00000008283.17	ENST00000585153.1	10.3468	-2.82546	1.05718	-2.67264	0.00752562	0.0136441
ENSG00000008294.23	ENST00000509724.1	228.473	-1.59029	0.240953	-6.59998	4.11207e-11	1.48405e-10
ENSG00000008300.17	ENST00000164024.5	1239.1	0.690669	0.154526	4.4696	7.83657e-06	1.96112e-05
ENSG00000008311.17	ENST00000679659.1	500.68	-0.673682	0.214187	-3.1453	0.00165919	0.00328962
ENSG00000008323.17	ENST00000536531.5	2.8266	0.26279	2.96993	0.0884835	0.929492	0.953018
ENSG00000008324.13	ENST00000897957.1	68.5821	-1.82289	0.338313	-5.38817	7.11777e-08	2.08365e-07
ENSG00000008382.17	ENST00000601877.1	24.3993	-0.898607	0.553527	-1.62342	0.104499	0.1543
ENSG00000008394.14	ENST00000624056.1	13.5965	-3.06142	1.18817	-2.57657	0.00997853	0.0177599
ENSG00000008405.13	ENST00000546722.1	37.5882	-1.78891	0.477327	-3.74777	0.000178414	0.000394136
ENSG00000008441.19	ENST00000591028.1	82.7231	-1.60767	0.379731	-4.23371	2.29866e-05	5.52505e-05
ENSG00000008513.18	ENST00000522285.1	4.7732	-0.825969	0.978633	-0.844002	0.398668	0.496315
ENSG00000008516.20	ENST00000612971.2	87.2015	0.262528	0.670745	0.391397	0.695504	0.777201
ENSG00000008517.20	ENST00000525003.1	22.4304	-2.73798	0.974367	-2.81001	0.00495405	0.00921037
ENSG00000008710.20	ENST00000568796.1	67.0884	1.25782	0.392512	3.20454	0.0013528	0.00271279
ENSG00000008735.15	ENST00000952232.1	233.962	-1.42134	0.273723	-5.19264	2.07333e-07	5.88103e-07
ENSG00000008838.22	ENST00000492176.2	269.76	-1.48807	0.198619	-7.49211	6.77766e-14	2.83097e-13
ENSG00000008853.19	ENST00000523918.1	21.0573	-2.21563	0.64525	-3.43375	0.000595283	0.00124339
ENSG00000008869.13	ENST00000471051.1	113.497	-0.32501	0.254482	-1.27714	0.201552	0.275454
ENSG00000008952.18	ENST00000469890.1	39.2122	-1.17575	0.465473	-2.52593	0.0115391	0.0203565
ENSG00000008988.12	ENST00000519369.1	1866.61	-5.67749	0.215715	-26.3194	1.14926e-152	9.86156e-151
ENSG00000009307.18	ENST00000483407.1	1245.08	-3.62591	0.155653	-23.2948	5.00005e-120	2.83363e-118
ENSG00000009335.20	ENST00000469336.1	409.678	1.44641	0.197729	7.3151	2.57192e-13	1.04259e-12
ENSG00000009413.17	ENST00000470871.1	115.7	0.644482	0.266581	2.41759	0.0156238	0.0269644
ENSG00000009694.14	ENST00000422452.4	1858.22	2.46733	0.146995	16.7852	3.13125e-63	6.37104e-62
ENSG00000009709.14	ENST00000713642.1	4.2792	0.260009	1.01734	0.255577	0.798278	0.869215
ENSG00000009724.19	ENST00000480221.1	36.5291	1.62032	0.647232	2.50346	0.0122984	0.02158
ENSG00000009765.16	ENST00000229447.9	20.7298	1.84842	1.75676	1.05217	0.29272	0.380564
ENSG00000009780.17	ENST00000446647.1	61.9905	0.193855	0.360655	0.537507	0.590918	0.68152
ENSG00000009830.14	ENST00000683721.1	38.3855	-1.39795	0.44021	-3.17564	0.00149506	0.00298164
ENSG00000009844.17	ENST00000890564.1	1098.1	-0.600661	0.131604	-4.56414	5.01539e-06	1.27736e-05
ENSG00000009950.17	ENST00000467221.1	18.0896	2.15009	0.633607	3.39341	0.000690284	0.00143172
ENSG00000009954.11	ENST00000466844.1	230.958	0.0992425	0.266372	0.372571	0.709468	0.789692
ENSG00000010017.14	ENST00000469916.1	133.791	-0.176463	0.216163	-0.81634	0.414306	0.511453
ENSG00000010030.14	ENST00000339796.9	161.559	-1.26085	0.618416	-2.03883	0.0414665	0.0665051
ENSG00000010072.17	ENST00000492437.1	120.171	-1.78445	0.276869	-6.44512	1.1551e-10	4.0594e-10
ENSG00000010165.21	ENST00000485629.1	143.675	-1.7794	0.24877	-7.15277	8.50437e-13	3.35937e-12
ENSG00000010219.14	ENST00000544050.1	49.1378	-2.84175	0.463154	-6.13564	8.48173e-10	2.83948e-09
ENSG00000010244.20	ENST00000582705.1	1239.75	-1.35596	0.161987	-8.37075	5.72548e-17	2.78032e-16
ENSG00000010256.13	ENST00000480561.5	268.696	-3.0284	0.234267	-12.9272	3.16247e-38	3.28723e-37
ENSG00000010270.15	ENST00000972201.1	368.233	-0.413578	0.15828	-2.61296	0.00897628	0.0160926
ENSG00000010278.16	ENST00000676638.1	79.5481	-3.32686	0.429174	-7.75178	9.0615e-15	3.96407e-14
ENSG00000010282.16	ENST00000480939.1	1.05314	0.262789	3.995	0.0657795	0.947553	0.963212
ENSG00000010292.14	ENST00000536090.1	294.961	-2.5201	0.192972	-13.0594	5.61675e-39	5.98114e-38
ENSG00000010310.10	ENST00000591322.1	5.39742	4.5127	1.81486	2.48653	0.0128997	0.0225619
ENSG00000010318.23	ENST00000473145.5	51.8013	0.0956914	0.366465	0.26112	0.794	0.865266
ENSG00000010319.8	ENST00000475739.1	12.5063	1.26286	1.06359	1.18736	0.235086	0.314853
ENSG00000010322.17	ENST00000467594.1	96.1664	0.0403687	0.257471	0.156789	0.875411	0.93552
ENSG00000010327.11	ENST00000469989.1	4.64455	-0.334393	1.88719	-0.177191	0.859359	0.922346
ENSG00000010361.15	ENST00000534138.1	42.663	-1.70795	0.438171	-3.89791	9.70251e-05	0.000220309
ENSG00000010379.17	ENST00000534887.1	13.5046	3.29028	1.85506	1.77368	0.0761166	0.115746
ENSG00000010404.19	ENST00000428056.6	103.085	-1.05447	0.28679	-3.67679	0.000236191	0.000514992
ENSG00000010539.13	ENST00000575630.1	55.2303	-1.78135	0.429965	-4.14301	3.42777e-05	8.10599e-05
ENSG00000010610.11	ENST00000539492.1	48.5132	2.70557	1.80115	1.50214	0.133062	0.191078
ENSG00000010626.16	ENST00000486401.1	141.56	-1.99442	0.564309	-3.53426	0.000408915	0.000869255
ENSG00000010671.19	ENST00000695632.1	119.526	3.70544	1.62864	2.27518	0.022895	0.0384429
ENSG00000010803.19	ENST00000488592.1	664.763	2.35946	0.144217	16.3605	3.66298e-60	6.86792e-59
ENSG00000010810.19	ENST00000495935.1	232.198	-0.646326	0.172173	-3.75393	0.000174086	0.00038503
ENSG00000010818.12	ENST00000703920.1	1674.41	1.72192	0.135375	12.7196	4.59917e-37	4.55537e-36
ENSG00000011007.14	ENST00000609199.2	1961.46	-1.19664	0.0820927	-14.5767	3.95428e-48	5.46978e-47
ENSG00000011009.13	ENST00000472213.1	181.065	-2.43444	0.294009	-8.28015	1.23016e-16	5.88923e-16
ENSG00000011021.24	ENST00000494028.1	57.9606	1.95322	0.327351	5.96674	2.42038e-09	7.85335e-09
ENSG00000011028.14	ENST00000580916.1	42.0774	-0.958667	0.512954	-1.86891	0.0616347	0.0955577
ENSG00000011083.9	ENST00000524041.1	3.82303	0.26279	2.75501	0.0953862	0.924008	0.951237
ENSG00000011105.15	ENST00000539631.1	46.7878	0.877502	0.453186	1.9363	0.0528313	0.0830827
ENSG00000011114.16	ENST00000555525.1	226.676	-0.135523	0.211383	-0.641124	0.521442	0.616532
ENSG00000011132.13	ENST00000586991.1	47.1279	0.0112284	0.486005	0.0231035	0.981568	0.985369
ENSG00000011143.20	ENST00000583577.1	23.5177	-1.59836	0.519404	-3.07729	0.00208892	0.00409183
ENSG00000011198.11	ENST00000463153.2	619.374	-0.0728921	0.15995	-0.455717	0.648594	0.734151
ENSG00000011201.13	ENST00000481896.1	25.21	-2.735	0.61879	-4.41992	9.87354e-06	2.44886e-05
ENSG00000011258.17	ENST00000586898.1	100.847	0.657149	0.361552	1.81758	0.0691283	0.106108
ENSG00000011260.15	ENST00000582150.1	60.5729	-0.767655	0.354626	-2.16469	0.0304115	0.049927
ENSG00000011275.19	ENST00000479541.1	128.631	1.34477	0.208726	6.44273	1.1734e-10	4.1215e-10
ENSG00000011295.17	ENST00000583704.1	120.805	-1.41688	0.232311	-6.09903	1.06713e-09	3.55202e-09
ENSG00000011304.23	ENST00000592113.5	2148.18	-2.54335	0.126466	-20.1109	5.92315e-90	2.04583e-88
ENSG00000011332.23	ENST00000488378.1	20.904	0.356632	0.465125	0.766745	0.443233	0.539748
ENSG00000011347.11	ENST00000540831.1	14.291	0.108276	0.56238	0.192531	0.847326	0.911908
ENSG00000011376.13	ENST00000474585.1	82.0076	-0.396764	0.307144	-1.29179	0.196431	0.269329
ENSG00000011405.15	ENST00000265970.11	1685.41	0.316787	0.190134	1.66613	0.0956884	0.142385
ENSG00000011422.13	ENST00000593447.5	35.4366	-0.823297	0.462464	-1.78024	0.0750365	0.11427
ENSG00000011426.12	ENST00000429082.1	531.521	-0.956192	0.228367	-4.18708	2.82569e-05	6.73988e-05
ENSG00000011451.22	ENST00000600632.1	173.438	-1.84641	0.26859	-6.87446	6.2226e-12	2.34424e-11
ENSG00000011454.19	ENST00000474707.1	77.2286	0.175624	0.318902	0.550714	0.58183	0.673783
ENSG00000011465.19	ENST00000548218.1	2.14987	0.262788	4.91469	0.0534699	0.957358	0.96976
ENSG00000011478.13	ENST00000591606.1	108.995	0.944663	0.269433	3.50611	0.000454702	0.000962088
ENSG00000011485.16	ENST00000467902.2	208.663	-1.66577	0.203329	-8.19249	2.55877e-16	1.20682e-15
ENSG00000011523.16	ENST00000497039.1	107.285	-1.38739	0.281449	-4.92945	8.24632e-07	2.23967e-06
ENSG00000011566.16	ENST00000475457.1	65.3018	1.56054	0.316115	4.93662	7.94896e-07	2.16105e-06
ENSG00000011590.15	ENST00000890381.1	5.49628	0.26279	2.44064	0.107673	0.914255	0.94922
ENSG00000011638.12	ENST00000573688.1	37.3241	-1.44157	0.443101	-3.25336	0.0011405	0.00230616
ENSG00000012048.27	ENST00000700082.1	178.474	-0.644565	0.202279	-3.18652	0.00143997	0.00287755
ENSG00000012061.18	ENST00000592410.5	43.4144	-0.89718	0.412268	-2.17621	0.0295398	0.0486075
ENSG00000012171.21	ENST00000439487.5	45.406	3.06845	1.16397	2.63619	0.00838431	0.0150961
ENSG00000012174.13	ENST00000860793.1	816.451	-0.787682	0.130207	-6.04948	1.45318e-09	4.79264e-09
ENSG00000012223.14	ENST00000462667.1	13.242	0.262788	4.69216	0.0560057	0.955337	0.968551
ENSG00000012232.11	ENST00000523271.1	275.795	-2.21947	0.192056	-11.5563	6.85619e-31	5.57981e-30
ENSG00000012504.16	ENST00000188403.7	209.926	-0.737326	1.77428	-0.415564	0.677729	0.760943
ENSG00000012660.15	ENST00000893722.1	1028.68	-0.810355	0.118233	-6.85387	7.18776e-12	2.69702e-11
ENSG00000012779.13	ENST00000475300.1	0.883737	-3.18827	2.72991	-1.1679	0.242846	0.324028
ENSG00000012822.17	ENST00000546443.5	201.264	-0.606732	0.184701	-3.28495	0.00102001	0.00207542
ENSG00000012963.16	ENST00000940499.1	723.973	-2.04003	0.14278	-14.288	2.60046e-46	3.38856e-45
ENSG00000012983.13	ENST00000557124.1	79.1319	0.978372	0.325781	3.00316	0.00267192	0.0051542
ENSG00000013016.17	ENST00000322054.10	132.097	-1.35747	0.225676	-6.01514	1.79734e-09	5.8868e-09
ENSG00000013275.9	ENST00000601194.1	149.983	-3.28321	0.309427	-10.6106	2.65971e-26	1.84926e-25
ENSG00000013288.10	ENST00000510427.1	11.8443	-0.108458	0.620504	-0.17479	0.861245	0.923727
ENSG00000013297.13	ENST00000477531.3	287.96	4.35034	1.49406	2.91176	0.00359401	0.0068171
ENSG00000013306.17	ENST00000592372.5	459.032	-2.04873	0.251703	-8.13947	3.97009e-16	1.85725e-15
ENSG00000013374.18	ENST00000497987.1	198.781	-0.855481	0.18001	-4.7524	2.01016e-06	5.29516e-06
ENSG00000013375.18	ENST00000605602.1	7.12777	-2.47435	1.11262	-2.22389	0.0261561	0.0434526
ENSG00000013392.9	ENST00000925505.1	37.9938	-2.05807	0.494411	-4.16267	3.14553e-05	7.47018e-05
ENSG00000013441.18	ENST00000461326.1	40.0219	-0.220897	0.484929	-0.455525	0.648732	0.734232
ENSG00000013503.11	ENST00000970164.1	898.645	0.359658	0.135407	2.65612	0.00790462	0.0142848
ENSG00000013523.13	ENST00000251089.8	548.228	-0.624823	0.141216	-4.4246	9.66219e-06	2.39847e-05
ENSG00000013561.19	ENST00000963023.1	318.956	-0.729863	0.155177	-4.70342	2.55834e-06	6.67707e-06
ENSG00000013563.15	ENST00000497242.1	25.8327	-1.09861	0.538833	-2.03887	0.0414633	0.0665008
ENSG00000013573.18	ENST00000539702.1	266.944	0.0935718	0.183117	0.510993	0.609356	0.69865
ENSG00000013583.11	ENST00000905178.1	147.38	-0.764462	0.20793	-3.67654	0.000236423	0.000515481
ENSG00000013588.11	ENST00000648791.1	118.205	-2.00658	0.279993	-7.16655	7.69101e-13	3.04475e-12
ENSG00000013619.16	ENST00000464149.1	22.8195	-0.664701	0.71	-0.936198	0.349171	0.443122
ENSG00000013725.15	ENST00000538288.1	4.74976	0.262786	6.12072	0.0429338	0.965754	0.972157
ENSG00000013810.22	ENST00000484264.1	51.112	-1.32197	0.358488	-3.68764	0.000226348	0.000494526
ENSG00000014123.11	ENST00000461673.1	24.8636	-2.09299	0.528997	-3.95653	7.60448e-05	0.000174436
ENSG00000014138.11	ENST00000706542.1	140.549	0.0459593	0.19905	0.230893	0.817398	0.885906
ENSG00000014164.8	ENST00000528401.1	163	1.53101	0.325091	4.70949	2.48339e-06	6.48928e-06
ENSG00000014216.17	ENST00000527887.1	34.4599	-2.36697	0.529304	-4.47186	7.75426e-06	1.94149e-05
ENSG00000014257.17	ENST00000507647.1	1.78375	-1.1766	2.61017	-0.450773	0.652153	0.73755
ENSG00000014641.22	ENST00000495083.1	144.35	-3.8655	0.328942	-11.7513	6.95301e-32	5.85745e-31
ENSG00000014824.15	ENST00000505523.1	388.628	-0.353027	0.180917	-1.95132	0.0510192	0.0804549
ENSG00000014919.14	ENST00000016171.6	712.474	-1.36474	0.114227	-11.9477	6.67768e-33	5.80896e-32
ENSG00000015133.20	ENST00000555995.1	29.8778	-0.539043	0.518892	-1.03884	0.298881	0.387353
ENSG00000015153.16	ENST00000550315.1	46.4429	-1.76333	0.381649	-4.62028	3.83218e-06	9.85169e-06
ENSG00000015285.13	ENST00000483750.6	253.169	2.06986	1.17359	1.76369	0.0777835	0.117934
ENSG00000015413.11	ENST00000261615.5	366.379	0.846667	0.789895	1.07187	0.283777	0.370504
ENSG00000015475.20	ENST00000494097.5	64.9052	-1.38536	0.293576	-4.7189	2.37119e-06	6.20711e-06
ENSG00000015479.21	ENST00000511333.5	737.132	-2.09745	0.189368	-11.0761	1.63844e-28	1.23408e-27
ENSG00000015520.16	ENST00000423141.1	255.313	2.72209	0.662414	4.10935	3.9677e-05	9.334e-05
ENSG00000015532.11	ENST00000571021.1	59.3369	-0.737666	0.371775	-1.98417	0.0472364	0.0750221
ENSG00000015592.18	ENST00000519614.5	23.0464	0.581256	0.706963	0.822188	0.41097	0.50836
ENSG00000015676.19	ENST00000480209.1	34.1257	0.171521	0.448558	0.382384	0.702177	0.783302
ENSG00000016082.16	ENST00000967706.1	66.7882	-2.20267	0.319004	-6.90483	5.02631e-12	1.90317e-11
ENSG00000016391.12	ENST00000959593.1	133.353	-0.902298	0.259248	-3.48044	0.000500583	0.00105468
ENSG00000016402.15	ENST00000460306.1	0.802319	1.70509	3.42497	0.497842	0.618595	0.707322
ENSG00000016864.20	ENST00000463762.1	43.1186	-1.83358	0.445808	-4.11293	3.90667e-05	9.19602e-05
ENSG00000017260.21	ENST00000507194.1	163.905	-1.20625	0.207835	-5.80388	6.47983e-09	2.03812e-08
ENSG00000017483.17	ENST00000429543.2	9.50786	5.29044	1.67199	3.16416	0.00155529	0.00309405
ENSG00000017797.14	ENST00000943836.1	729.597	-0.545081	0.123889	-4.39976	1.08369e-05	2.67887e-05
ENSG00000018189.14	ENST00000504805.6	595.501	0.303484	0.211351	1.43592	0.151024	0.213506
ENSG00000018236.16	ENST00000551424.5	182.718	3.02792	0.189637	15.967	2.17143e-57	3.8185e-56
ENSG00000018510.19	ENST00000681565.1	2341.26	0.350168	0.132093	2.65092	0.00802736	0.0144913
ENSG00000018610.16	ENST00000644802.2	481.6	-0.261537	0.151643	-1.72469	0.0845838	0.127172
ENSG00000018699.14	ENST00000448773.5	149.188	-0.755276	0.20409	-3.7007	0.000215008	0.000470789
ENSG00000018869.19	ENST00000301310.8	59.8761	-0.701702	0.33544	-2.09189	0.0364485	0.0590098
ENSG00000019144.21	ENST00000525226.5	79.5871	-0.103203	0.298819	-0.345369	0.729817	0.808239
ENSG00000019169.12	ENST00000958834.1	2.19062	0.262786	6.12072	0.0429338	0.965754	0.972157
ENSG00000019485.15	ENST00000622142.5	160.348	-0.392576	0.186452	-2.1055	0.0352476	0.0571905
ENSG00000019505.8	ENST00000528101.1	3.12371	0.26279	3.08296	0.0852394	0.932071	0.954232
ENSG00000019549.13	ENST00000396822.6	155.623	-3.47621	0.32826	-10.5898	3.32296e-26	2.29586e-25
ENSG00000019582.18	ENST00000377795.7	57.4095	1.5847	1.24341	1.27447	0.202496	0.276604
ENSG00000019991.18	ENST00000453018.1	1.45519	0.26279	2.95604	0.0888991	0.929162	0.952962
ENSG00000019995.6	ENST00000471421.1	103.446	-0.469931	0.276193	-1.70146	0.0888566	0.133024
ENSG00000020129.17	ENST00000459931.1	219.47	-1.34236	0.237092	-5.66177	1.49817e-08	4.60168e-08
ENSG00000020181.19	ENST00000428068.5	1988.59	1.03311	0.137846	7.4947	6.64495e-14	2.77696e-13
ENSG00000020256.21	ENST00000371523.8	266.416	0.0597795	0.148759	0.401854	0.687791	0.770079
ENSG00000020426.12	ENST00000557134.1	1471.68	2.74673	0.169278	16.2261	3.29578e-59	6.05001e-58
ENSG00000020577.15	ENST00000673833.1	19.6665	-0.760969	0.631377	-1.20525	0.228106	0.306577
ENSG00000020633.19	ENST00000479341.1	353.054	-1.17991	2.04456	-0.577097	0.563874	0.657804
ENSG00000020922.14	ENST00000535120.1	35.6298	-0.418625	0.424833	-0.985387	0.324434	0.415784
ENSG00000021300.14	ENST00000544282.1	17.5584	-4.55251	1.17273	-3.88198	0.000103611	0.000234634
ENSG00000021355.14	ENST00000468511.5	42.7476	-2.56603	0.459119	-5.58904	2.28327e-08	6.92664e-08
ENSG00000021461.19	ENST00000631161.2	14.1489	0.26279	2.14879	0.122297	0.902664	0.948885
ENSG00000021488.14	ENST00000879211.1	66.3944	1.08434	0.415865	2.60743	0.00912245	0.0163368
ENSG00000021574.16	ENST00000645550.1	29.8897	1.09284	0.444648	2.45777	0.0139804	0.0243054
ENSG00000021645.20	ENST00000556088.1	969.339	6.09777	1.48445	4.10777	3.99494e-05	9.39674e-05
ENSG00000021762.21	ENST00000477622.1	31.566	1.73567	0.462126	3.75584	0.000172759	0.000382279
ENSG00000021776.12	ENST00000559767.1	173.521	-1.66739	0.269116	-6.19582	5.79833e-10	1.95905e-09
ENSG00000021826.19	ENST00000479988.1	144.578	-2.18598	0.260994	-8.37559	5.4947e-17	2.67111e-16
ENSG00000021852.15	ENST00000875305.1	10.65	0.26279	2.30895	0.113814	0.909385	0.948885
ENSG00000022267.20	ENST00000630677.1	306.9	-3.31626	0.216806	-15.296	8.1351e-53	1.2694e-51
ENSG00000022277.14	ENST00000477573.1	183.002	-2.22133	0.222943	-9.96365	2.19833e-23	1.37839e-22
ENSG00000022556.17	ENST00000586512.1	1.80512	0.262789	3.58546	0.0732931	0.941573	0.959223
ENSG00000022567.11	ENST00000519067.5	93.8724	-0.323957	0.275498	-1.1759	0.239637	0.320276
ENSG00000022840.17	ENST00000544124.1	116.357	-2.21232	0.262073	-8.44165	3.12894e-17	1.53762e-16
ENSG00000022976.17	ENST00000559098.5	307.474	0.237238	0.144308	1.64397	0.100183	0.148494
ENSG00000023041.13	ENST00000682143.1	306.423	-0.941787	0.227489	-4.13992	3.47433e-05	8.21276e-05
ENSG00000023171.21	ENST00000533341.3	23.4649	0.0150262	0.490228	0.0306515	0.975547	0.980252
ENSG00000023191.18	ENST00000531223.1	122.07	-1.59846	0.331866	-4.81657	1.46049e-06	3.8938e-06
ENSG00000023228.16	ENST00000233190.11	1456.86	-0.696872	0.0930193	-7.4917	6.79895e-14	2.83979e-13
ENSG00000023287.14	ENST00000523594.1	208.999	-0.862449	0.263159	-3.27729	0.00104808	0.00212892
ENSG00000023318.10	ENST00000690306.1	59.4357	0.643413	0.309932	2.07598	0.0378957	0.0611833
ENSG00000023330.16	ENST00000459884.1	40.2536	-1.60629	0.421138	-3.81418	0.000136638	0.000305658
ENSG00000023445.18	ENST00000527336.1	1.26581	0.262789	3.37777	0.0777998	0.937987	0.957336
ENSG00000023516.10	ENST00000025301.4	746.841	-0.31433	0.163303	-1.92483	0.0542504	0.0850701
ENSG00000023572.10	ENST00000608166.2	150.158	-1.79295	0.230963	-7.76292	8.29963e-15	3.63919e-14
ENSG00000023608.6	ENST00000923637.1	292.249	0.575101	0.166764	3.44859	0.00056353	0.00118089
ENSG00000023697.14	ENST00000532573.1	659.039	1.10179	0.158178	6.96553	3.27165e-12	1.24992e-11
ENSG00000023734.12	ENST00000539887.1	279.494	-2.50415	0.176749	-14.1679	1.44845e-45	1.85109e-44
ENSG00000023839.12	ENST00000496621.1	6.77401	0.551092	1.01443	0.543254	0.586955	0.678092
ENSG00000023892.13	ENST00000468102.2	12.5997	-2.38886	0.994713	-2.40156	0.0163253	0.0280811
ENSG00000023902.14	ENST00000441340.1	40.9167	-1.01249	0.429311	-2.3584	0.018354	0.0313226
ENSG00000023909.11	ENST00000370238.8	395.402	-0.833843	0.219263	-3.80294	0.000142991	0.000319021
ENSG00000024048.12	ENST00000910623.1	1433.42	0.908367	0.123739	7.34099	2.12027e-13	8.6373e-13
ENSG00000024422.13	ENST00000540884.1	11.5941	-2.44285	0.958347	-2.54903	0.0108023	0.0191449
ENSG00000024526.18	ENST00000488146.5	430.253	-2.20171	0.198873	-11.071	1.73545e-28	1.30611e-27
ENSG00000024862.19	ENST00000617445.5	268.855	-0.75574	0.160085	-4.72086	2.34855e-06	6.14965e-06
ENSG00000025039.16	ENST00000936139.1	454.413	-0.000270391	0.115212	-0.0023469	0.998127	0.998746
ENSG00000025156.14	ENST00000465214.2	367.527	-0.695012	0.248889	-2.79246	0.00523092	0.00969064
ENSG00000025293.18	ENST00000420233.1	13.5834	-2.4064	0.84893	-2.83463	0.00458793	0.00856826
ENSG00000025423.12	ENST00000553476.1	11.0804	-1.32076	0.877287	-1.50551	0.132194	0.189977
ENSG00000025434.20	ENST00000494018.1	11.9994	-0.240216	0.905604	-0.265255	0.790813	0.863087
ENSG00000025770.20	ENST00000522304.1	90.2426	-0.965909	0.332484	-2.90513	0.00367102	0.00695406
ENSG00000025772.9	ENST00000879562.1	446.368	-1.43696	0.138557	-10.3709	3.36322e-25	2.24565e-24
ENSG00000025796.15	ENST00000489455.1	204.637	-0.81113	0.209779	-3.8666	0.000110365	0.000249245
ENSG00000025800.14	ENST00000446515.1	460.904	0.0860731	0.172633	0.498591	0.618068	0.706828
ENSG00000026025.17	ENST00000497849.1	1591.83	-4.67505	0.41528	-11.2576	2.12509e-29	1.65103e-28
ENSG00000026297.18	ENST00000683333.1	59.2676	-1.19179	0.336767	-3.5389	0.000401794	0.000854727
ENSG00000026508.22	ENST00000531141.1	54.2351	-2.34205	0.375677	-6.23421	4.54067e-10	1.54328e-09
ENSG00000026559.15	ENST00000506387.1	46.7129	-2.45941	0.495826	-4.96024	7.04078e-07	1.92159e-06
ENSG00000026652.16	ENST00000436279.1	1045.37	1.21002	0.1485	8.1483	3.69073e-16	1.72876e-15
ENSG00000026751.18	ENST00000495334.1	2.32106	-3.52146	5.9827	-0.588607	0.556125	0.650248
ENSG00000026950.19	ENST00000865812.1	63.1783	-0.268863	0.332122	-0.809532	0.418209	0.515189
ENSG00000027001.11	ENST00000469167.1	99.1057	-1.12029	0.246363	-4.5473	5.43386e-06	1.38016e-05
ENSG00000027075.18	ENST00000557559.1	2.03287	-0.736989	1.60004	-0.460606	0.645082	0.731175
ENSG00000027644.5	ENST00000368195.4	8.11034	2.06505	1.22085	1.69149	0.0907436	0.135627
ENSG00000027697.17	ENST00000696695.1	378.016	-0.949256	0.128618	-7.38046	1.57749e-13	6.47756e-13
ENSG00000027847.15	ENST00000507061.1	35.9484	-0.687908	0.413282	-1.6645	0.0960123	0.142821
ENSG00000027869.14	ENST00000468744.5	4.86169	-0.331176	1.68868	-0.196115	0.84452	0.909387
ENSG00000028116.19	ENST00000916218.1	690.432	0.524707	0.169367	3.09805	0.00194797	0.00382906
ENSG00000028137.20	ENST00000489921.1	3.00423	0.262786	6.12072	0.0429338	0.965754	0.972157
ENSG00000028203.20	ENST00000552306.1	351.843	-0.409479	0.193642	-2.11462	0.0344625	0.0560141
ENSG00000028277.23	ENST00000598842.2	118.009	1.58394	1.24054	1.27681	0.201668	0.275585
ENSG00000028310.19	ENST00000497410.5	230.975	0.380826	0.203214	1.87402	0.0609281	0.0945609
ENSG00000028528.16	ENST00000559961.1	59.505	-0.800856	0.372878	-2.14777	0.031732	0.0519123
ENSG00000028839.10	ENST00000481694.1	50.6673	-1.42737	0.388731	-3.67187	0.000240784	0.000524595
ENSG00000029153.16	ENST00000539558.1	66.0571	1.19983	0.296068	4.05253	5.06676e-05	0.000118052
ENSG00000029363.18	ENST00000534321.1	285.031	-1.87191	0.207111	-9.03817	1.59323e-19	8.59962e-19
ENSG00000029364.13	ENST00000554023.1	73.6956	-0.72737	0.28897	-2.51711	0.011832	0.0208321
ENSG00000029534.22	ENST00000521407.1	26.9335	3.58437	1.57888	2.2702	0.0231956	0.0389098
ENSG00000029639.12	ENST00000495806.1	725.472	0.804204	0.148032	5.43263	5.55307e-08	1.63705e-07
ENSG00000029725.18	ENST00000572250.1	129.784	0.176824	0.253771	0.696788	0.485935	0.581775
ENSG00000029993.16	ENST00000430118.1	195.104	-2.88298	0.244733	-11.7801	4.94488e-32	4.18906e-31
ENSG00000030066.15	ENST00000527126.1	73.9103	-0.228587	0.296521	-0.770895	0.440769	0.537273
ENSG00000030110.15	ENST00000886800.1	148.314	-2.17989	0.26748	-8.14972	3.64781e-16	1.70907e-15
ENSG00000030419.18	ENST00000484040.1	22.2861	-1.16167	0.539056	-2.155	0.0311615	0.0510509
ENSG00000030582.20	ENST00000586242.1	410.457	-4.71683	0.324172	-14.5504	5.80638e-48	7.97611e-47
ENSG00000031003.12	ENST00000505281.1	50.7927	0.323309	0.371372	0.870582	0.383982	0.480949
ENSG00000031081.12	ENST00000861944.1	167.682	0.134615	0.197013	0.683282	0.494429	0.589893
ENSG00000031691.8	ENST00000954364.1	237.785	-0.114171	0.230611	-0.495079	0.620545	0.709084
ENSG00000031698.14	ENST00000468588.1	344.709	-2.84544	0.208625	-13.6391	2.34528e-42	2.73524e-41
ENSG00000031823.15	ENST00000587799.1	151.308	-1.18838	0.236179	-5.03169	4.86181e-07	1.34175e-06
ENSG00000032219.20	ENST00000466065.1	111.666	0.430589	0.362593	1.18753	0.235019	0.31477
ENSG00000032389.14	ENST00000496433.5	48.2084	-0.731101	0.366169	-1.99662	0.0458662	0.0730125
ENSG00000032742.19	ENST00000470695.1	14.0923	1.36152	0.595539	2.28619	0.0222432	0.037429
ENSG00000033011.15	ENST00000961948.1	211.635	-0.903329	0.169302	-5.3356	9.523e-08	2.76542e-07
ENSG00000033030.17	ENST00000538116.5	437.243	-0.315911	0.152988	-2.06493	0.0389293	0.0627142
ENSG00000033050.10	ENST00000468073.5	394.103	-1.45411	0.152026	-9.56486	1.12359e-21	6.60837e-21
ENSG00000033100.17	ENST00000690444.1	90.4551	-1.28721	0.289972	-4.43909	9.03406e-06	2.24853e-05
ENSG00000033122.22	ENST00000565615.1	1.00448	2.58783	2.50455	1.03325	0.301487	0.390258
ENSG00000033170.18	ENST00000557338.5	586.876	2.5954	0.156929	16.5387	1.93231e-61	3.73457e-60
ENSG00000033178.14	ENST00000514261.1	168.364	-0.858924	0.337561	-2.5445	0.0109434	0.0193768
ENSG00000033327.13	ENST00000528329.1	39.7752	-1.29332	0.481382	-2.68669	0.00721632	0.0131207
ENSG00000033627.19	ENST00000587797.1	384.802	-1.55725	0.1544	-10.0858	6.38354e-24	4.08327e-23
ENSG00000033800.15	ENST00000563996.1	391.673	-0.52276	0.137777	-3.79424	0.000148095	0.000329874
ENSG00000033867.19	ENST00000428005.1	531.804	1.91793	0.142921	13.4196	4.64474e-41	5.25482e-40
ENSG00000034053.16	ENST00000558358.1	156.086	-0.508075	0.242127	-2.09838	0.0358715	0.0581351
ENSG00000034152.21	ENST00000477540.1	94.8243	-1.11457	0.417915	-2.66696	0.007654	0.0138594
ENSG00000034510.7	ENST00000877289.1	1212.39	-4.54375	0.217241	-20.9157	3.85009e-97	1.51329e-95
ENSG00000034533.13	ENST00000504725.1	19.4097	-3.19445	0.665166	-4.80249	1.56702e-06	4.16557e-06
ENSG00000034677.14	ENST00000520903.1	77.6351	-1.14137	0.452016	-2.52506	0.011568	0.0204032
ENSG00000034693.16	ENST00000585848.1	82.3958	-0.176707	0.264711	-0.667547	0.504423	0.59967
ENSG00000034713.8	ENST00000565057.5	220.771	-3.53183	0.268365	-13.1606	1.4796e-39	1.59986e-38
ENSG00000034971.18	ENST00000971579.1	1.73112	0.26279	2.7681	0.0949351	0.924366	0.951338
ENSG00000035115.23	ENST00000602998.1	4.19601	0.450461	1.30052	0.346369	0.729065	0.807534
ENSG00000035141.11	ENST00000460307.1	684.781	-2.9805	0.131014	-22.7494	1.45409e-114	7.5226e-113
ENSG00000035403.19	ENST00000472585.1	175.811	-1.79213	0.218734	-8.1932	2.54382e-16	1.19987e-15
ENSG00000035499.14	ENST00000505017.1	41.7801	-1.37831	0.370126	-3.7239	0.000196171	0.00043143
ENSG00000035681.11	ENST00000521972.1	62.8854	-0.759043	0.346209	-2.19244	0.0283478	0.0467832
ENSG00000035687.10	ENST00000462358.1	373.964	0.575601	0.185755	3.09871	0.00194364	0.00382105
ENSG00000035720.9	ENST00000894639.1	0.589681	-0.721394	3.42274	-0.210765	0.83307	0.899229
ENSG00000035862.14	ENST00000586057.5	333.964	-1.71849	0.180139	-9.53982	1.43078e-21	8.3766e-21
ENSG00000035928.18	ENST00000512726.1	108.429	-1.26311	0.7342	-1.72038	0.0853629	0.128244
ENSG00000036054.14	ENST00000471273.1	243.888	-0.991181	0.254008	-3.90216	9.5337e-05	0.000216636
ENSG00000036257.15	ENST00000481135.1	110.139	-1.07565	0.387007	-2.7794	0.00544599	0.0100637
ENSG00000036448.11	ENST00000518513.1	85.2002	-0.367808	0.291799	-1.26049	0.207494	0.282683
ENSG00000036473.10	ENST00000909241.1	1.79412	1.70591	2.71271	0.628859	0.529441	0.624323
ENSG00000036530.10	ENST00000554611.5	52.2499	2.00931	0.526881	3.8136	0.00013696	0.000306316
ENSG00000036549.14	ENST00000458763.2	237.871	1.58193	0.20541	7.70133	1.34659e-14	5.84107e-14
ENSG00000036672.17	ENST00000525189.5	13.5338	-1.44806	0.736588	-1.9659	0.0493104	0.0780284
ENSG00000036828.18	ENST00000643573.1	16.0069	0.26279	2.15044	0.122203	0.902738	0.948885
ENSG00000037042.10	ENST00000588870.1	160.222	1.10432	0.177795	6.21118	5.25888e-10	1.78053e-09
ENSG00000037280.17	ENST00000510000.1	24.485	-1.31305	0.525853	-2.49699	0.0125254	0.0219516
ENSG00000037474.16	ENST00000502932.1	91.5883	-1.64891	0.303621	-5.43083	5.60914e-08	1.65317e-07
ENSG00000037637.12	ENST00000456164.5	68.4341	-0.771771	0.309428	-2.49418	0.0126247	0.0221121
ENSG00000037749.14	ENST00000856254.1	220.007	-2.24746	0.199612	-11.2591	2.08787e-29	1.62242e-28
ENSG00000037897.18	ENST00000548504.1	30.8817	-1.87784	0.580695	-3.23377	0.00122167	0.00246262
ENSG00000038002.10	ENST00000511231.1	34.606	-3.87624	0.687686	-5.63664	1.73403e-08	5.30442e-08
ENSG00000038219.14	ENST00000927661.1	902.369	-0.608504	0.145967	-4.16877	3.06243e-05	7.2817e-05
ENSG00000038274.19	ENST00000695034.1	324.795	-2.98278	0.193991	-15.3759	2.37513e-53	3.76899e-52
ENSG00000038295.8	ENST00000504560.5	81.3859	2.1375	0.290368	7.36134	1.82077e-13	7.44902e-13
ENSG00000038382.23	ENST00000510757.1	43.5658	-0.558798	0.425564	-1.31308	0.189157	0.260444
ENSG00000038427.16	ENST00000513016.5	1059.7	-1.41094	0.190461	-7.40803	1.28192e-13	5.28615e-13
ENSG00000038532.18	ENST00000261657.5	680.331	0.505266	0.139032	3.63418	0.000278868	0.000603599
ENSG00000038945.16	ENST00000520846.1	3.28483	0.26279	2.57044	0.102236	0.91857	0.949783
ENSG00000039068.21	ENST00000567320.1	1.79139	-2.16706	2.6067	-0.831342	0.40578	0.503561
ENSG00000039123.17	ENST00000505565.5	702.454	0.281193	0.178732	1.57327	0.115657	0.168931
ENSG00000039139.11	ENST00000682586.1	4.87241	-0.732724	1.54615	-0.473904	0.635568	0.722692
ENSG00000039319.18	ENST00000512442.1	28.1263	1.75394	0.456238	3.84436	0.000120869	0.000271931
ENSG00000039523.21	ENST00000569733.6	260.777	-0.832659	0.195355	-4.26229	2.02338e-05	4.88565e-05
ENSG00000039560.15	ENST00000507883.1	67.716	-0.759894	0.344248	-2.2074	0.0272858	0.0451672
ENSG00000039600.12	ENST00000519442.1	42.3291	1.51272	0.693319	2.18185	0.0291209	0.0479626
ENSG00000039987.8	ENST00000552539.1	8.62915	2.70494	2.05934	1.31349	0.189016	0.260272
ENSG00000040199.19	ENST00000564884.5	499.171	-0.696401	0.139708	-4.98467	6.20661e-07	1.70061e-06
ENSG00000040275.18	ENST00000508837.1	44.5578	-0.561599	0.417957	-1.34368	0.179052	0.247908
ENSG00000040341.19	ENST00000522061.5	1308.21	2.30177	0.159478	14.4332	3.19879e-47	4.2826e-46
ENSG00000040487.14	ENST00000432465.1	36.6126	-0.629913	0.460506	-1.36787	0.171353	0.238479
ENSG00000040531.17	ENST00000488623.6	401.155	0.0552351	0.148334	0.37237	0.709617	0.789819
ENSG00000040608.14	ENST00000425986.1	18.8047	-2.94451	0.730926	-4.02847	5.61415e-05	0.000130226
ENSG00000040731.11	ENST00000503958.1	0.837909	-1.17485	3.55215	-0.330743	0.740838	0.817834
ENSG00000040933.18	ENST00000468638.1	40.007	-0.214522	0.365032	-0.587681	0.556747	0.650819
ENSG00000041353.11	ENST00000592334.1	8.33717	-1.89757	1.01108	-1.87677	0.0605494	0.094015
ENSG00000041357.17	ENST00000560033.5	704.802	-2.96769	0.153892	-19.2842	7.28483e-83	2.22298e-81
ENSG00000041802.12	ENST00000466391.1	55.3716	-1.53316	0.414257	-3.70099	0.000214762	0.00047026
ENSG00000041880.16	ENST00000486510.1	10.7298	-0.454309	0.786448	-0.577673	0.563485	0.657406
ENSG00000041982.18	ENST00000460345.1	909.717	-1.55555	0.129442	-12.0173	2.88185e-33	2.53429e-32
ENSG00000042088.15	ENST00000553569.1	19.2448	-1.06335	0.570692	-1.86327	0.0624241	0.0966536
ENSG00000042286.16	ENST00000856741.1	891.921	-0.0988773	0.177086	-0.558359	0.5766	0.66908
ENSG00000042317.18	ENST00000554102.5	71.1689	1.33433	0.294427	4.53197	5.84355e-06	1.47965e-05
ENSG00000042429.13	ENST00000533359.5	199.128	-1.0326	0.236512	-4.36593	1.26583e-05	3.1096e-05
ENSG00000042445.15	ENST00000482694.1	48.6454	-0.912479	0.369906	-2.46678	0.0136333	0.0237536
ENSG00000042493.17	ENST00000483659.5	14.4102	-3.61732	1.03083	-3.50912	0.0004496	0.000951851
ENSG00000042753.13	ENST00000600964.1	119.748	-4.0587	0.436543	-9.29738	1.43955e-20	8.10044e-20
ENSG00000042813.9	ENST00000465922.1	8.9337	0.26279	2.25331	0.116624	0.907158	0.948885
ENSG00000043039.7	ENST00000605151.1	16.0607	-2.26702	0.6435	-3.52294	0.00042678	0.000905826
ENSG00000043093.16	ENST00000292782.9	670.693	0.0772811	0.16735	0.461795	0.644229	0.730438
ENSG00000043143.23	ENST00000515554.1	57.5478	-0.0835369	0.493159	-0.169391	0.865489	0.927226
ENSG00000043355.12	ENST00000481565.1	361.832	-3.74396	0.269074	-13.9142	5.19226e-44	6.35915e-43
ENSG00000043514.17	ENST00000467774.1	38.3516	-0.42575	0.416631	-1.02189	0.306834	0.396098
ENSG00000043591.6	ENST00000369295.4	2.48006	-5.08087	2.13046	-2.38488	0.0170848	0.0293046
ENSG00000044115.22	ENST00000522792.1	385.614	-2.82527	0.175213	-16.1248	1.70895e-58	3.08814e-57
ENSG00000044446.13	ENST00000473597.1	46.9788	0.0167786	0.345596	0.0485496	0.961278	0.972034
ENSG00000044459.16	ENST00000484374.1	120.11	1.70079	0.215526	7.89132	2.99005e-15	1.3424e-14
ENSG00000044524.12	ENST00000452448.6	825.92	1.67308	0.145641	11.4877	1.52124e-30	1.22409e-29
ENSG00000044574.10	ENST00000680032.1	2450.92	-4.02403	0.109295	-36.818	9.51952e-297	6.46282e-294
ENSG00000046604.16	ENST00000684461.1	100.865	-2.61693	0.337901	-7.74464	9.58511e-15	4.18843e-14
ENSG00000046647.16	ENST00000398355.7	85.179	-1.11442	0.238609	-4.67048	3.0049e-06	7.79588e-06
ENSG00000046651.17	ENST00000485052.6	80.0696	-0.570012	0.289622	-1.96813	0.0490534	0.0776674
ENSG00000046653.15	ENST00000472735.5	268.978	-2.64623	0.209863	-12.6093	1.87591e-36	1.82418e-35
ENSG00000046774.10	ENST00000247452.4	0.497062	0.262786	5.89837	0.0445524	0.964464	0.972157
ENSG00000046889.20	ENST00000517617.1	139.656	0.978656	0.234394	4.17526	2.97649e-05	7.08498e-05
ENSG00000047056.19	ENST00000704675.1	831.951	0.987907	0.162704	6.07179	1.26493e-09	4.19004e-09
ENSG00000047188.17	ENST00000507567.1	54.4371	0.0334152	0.372739	0.0896477	0.928567	0.952832
ENSG00000047230.16	ENST00000483053.1	83.1333	-0.0496431	0.330056	-0.150408	0.880443	0.939676
ENSG00000047249.19	ENST00000521335.1	108.339	-1.18455	0.257465	-4.60083	4.20806e-06	1.07813e-05
ENSG00000047315.17	ENST00000464918.1	189.1	-3.26256	0.274353	-11.8918	1.30496e-32	1.1265e-31
ENSG00000047346.14	ENST00000568871.1	45.5737	-0.00833552	0.424939	-0.0196158	0.98435	0.987689
ENSG00000047365.14	ENST00000511416.1	12.1731	-0.559814	0.64285	-0.870831	0.383846	0.480797
ENSG00000047410.14	ENST00000492973.1	113.235	-0.61861	0.287342	-2.15287	0.0313287	0.0513083
ENSG00000047578.15	ENST00000568622.1	15.975	-1.11072	0.608463	-1.82545	0.0679338	0.104428
ENSG00000047579.21	ENST00000462989.6	244.976	1.51459	0.165497	9.15178	5.60052e-20	3.08218e-19
ENSG00000047597.7	ENST00000378616.5	60.6249	-0.192975	0.375501	-0.513913	0.607313	0.696786
ENSG00000047617.18	ENST00000544988.1	67.4838	1.12912	0.553151	2.04126	0.0412254	0.066144
ENSG00000047621.13	ENST00000535887.1	64.6814	1.18767	0.313286	3.79103	0.000150027	0.000333968
ENSG00000047644.20	ENST00000466248.1	11.6209	-0.739623	0.714033	-1.03584	0.300278	0.388922
ENSG00000047648.23	ENST00000491514.1	0.98232	0.262789	4.09475	0.0641771	0.948829	0.964168
ENSG00000047662.6	ENST00000265018.4	962.602	1.9985	0.238417	8.38236	5.18754e-17	2.52442e-16
ENSG00000047849.23	ENST00000462206.1	586.43	-1.14087	0.126345	-9.02987	1.7188e-19	9.26514e-19
ENSG00000047932.15	ENST00000964025.1	1321.93	-0.55713	0.167475	-3.32665	0.000878969	0.00180193
ENSG00000047936.12	ENST00000403284.2	8.45606	0.26279	2.20452	0.119205	0.905113	0.948885
ENSG00000048028.13	ENST00000544272.1	102.683	-1.00283	0.308093	-3.25496	0.0011341	0.00229413
ENSG00000048052.26	ENST00000425071.5	663.874	3.7004	0.15643	23.6553	1.04104e-123	6.24365e-122
ENSG00000048162.23	ENST00000510608.1	118.281	-1.27424	0.327266	-3.89359	9.87717e-05	0.000224086
ENSG00000048342.19	ENST00000652443.1	19.1947	-1.09341	0.505284	-2.16395	0.0304685	0.0500126
ENSG00000048392.14	ENST00000395910.6	85.4708	-1.5959	0.375185	-4.25363	2.10334e-05	5.0728e-05
ENSG00000048405.12	ENST00000485577.1	704.195	0.179723	0.202375	0.888069	0.374503	0.470799
ENSG00000048471.15	ENST00000568359.1	33.503	1.30684	0.385626	3.38889	0.000701768	0.00145418
ENSG00000048544.8	ENST00000934614.1	421.813	-1.2567	0.142798	-8.80056	1.36137e-18	7.04938e-18
ENSG00000048545.18	ENST00000679182.1	16.6129	0.26279	2.16502	0.12138	0.90339	0.948885
ENSG00000048649.14	ENST00000529470.1	54.4123	-0.867728	0.426055	-2.03666	0.0416845	0.0668292
ENSG00000048707.15	ENST00000643711.1	70.1498	1.0707	0.361613	2.96091	0.00306732	0.00587483
ENSG00000048740.20	ENST00000904655.1	1523.04	1.59481	0.095472	16.7044	1.2167e-62	2.43916e-61
ENSG00000048828.19	ENST00000475933.1	161.889	-0.937121	0.213095	-4.39767	1.09421e-05	2.70392e-05
ENSG00000048991.19	ENST00000487294.1	180.743	1.06599	0.234101	4.55357	5.27438e-06	1.34094e-05
ENSG00000049089.16	ENST00000427563.1	8.97802	-1.06383	1.14021	-0.93301	0.350815	0.444933
ENSG00000049130.17	ENST00000378535.4	266.174	-0.552399	0.183903	-3.00375	0.0026667	0.00514452
ENSG00000049167.17	ENST00000682750.1	61.1079	0.730522	0.358955	2.03514	0.0418371	0.0670554
ENSG00000049192.15	ENST00000502886.1	66.7482	1.16995	0.345107	3.3901	0.000698663	0.00144797
ENSG00000049239.14	ENST00000495451.1	88.4534	-1.80319	0.3077	-5.86021	4.6227e-09	1.46959e-08
ENSG00000049245.13	ENST00000054666.11	579.624	-2.33451	0.130358	-17.9085	1.01312e-71	2.46042e-70
ENSG00000049246.16	ENST00000473653.1	7.10337	2.17372	1.17072	1.85673	0.0633489	0.0979486
ENSG00000049247.14	ENST00000377516.6	64.219	-3.49949	1.61295	-2.16962	0.0300357	0.0493643
ENSG00000049249.11	ENST00000674210.1	70.1358	2.70556	1.798	1.50476	0.132387	0.19022
ENSG00000049323.17	ENST00000432635.1	203.708	1.74936	0.193917	9.02117	1.86092e-19	1.00113e-18
ENSG00000049449.11	ENST00000528630.1	585.939	-3.73901	0.215636	-17.3394	2.36999e-67	5.263e-66
ENSG00000049540.20	ENST00000477397.1	2.54455	0.262789	3.58449	0.0733128	0.941557	0.95921
ENSG00000049541.12	ENST00000485545.5	276.606	-0.349786	0.189951	-1.84145	0.0655552	0.101056
ENSG00000049618.26	ENST00000635928.1	592.74	-2.5479	0.163297	-15.6029	6.9566e-55	1.15782e-53
ENSG00000049656.15	ENST00000515719.5	344.439	-0.797783	0.185484	-4.3011	1.69955e-05	4.12716e-05
ENSG00000049759.21	ENST00000590506.1	95.2038	-1.50058	0.275168	-5.45332	4.94393e-08	1.46193e-07
ENSG00000049769.15	ENST00000495799.5	143.149	-0.762738	0.217008	-3.51479	0.000440094	0.000932787
ENSG00000049860.14	ENST00000509579.1	43.1044	-2.0591	0.415154	-4.95985	7.05492e-07	1.92534e-06
ENSG00000049883.16	ENST00000380639.10	326.793	-0.331234	0.188183	-1.76017	0.0783788	0.118759
ENSG00000050030.16	ENST00000642681.2	225.667	2.96419	0.315465	9.39625	5.65415e-21	3.23151e-20
ENSG00000050130.19	ENST00000553156.2	24.3413	-0.811964	0.484761	-1.67498	0.0939386	0.139999
ENSG00000050327.16	ENST00000474817.5	12.9032	-0.89669	0.767076	-1.16897	0.242415	0.323538
ENSG00000050344.10	ENST00000606261.1	55.5249	-3.61275	0.532318	-6.78682	1.14632e-11	4.25548e-11
ENSG00000050393.13	ENST00000607303.1	393.45	-1.6592	0.215182	-7.7107	1.2513e-14	5.43467e-14
ENSG00000050405.15	ENST00000550611.1	108.527	-2.18227	0.323521	-6.74536	1.5265e-11	5.62868e-11
ENSG00000050426.17	ENST00000548390.5	107.618	0.145891	0.255506	0.570988	0.568007	0.661543
ENSG00000050438.18	ENST00000546663.1	15.1266	-1.3199	0.979966	-1.34689	0.178016	0.246655
ENSG00000050555.20	ENST00000679272.1	45.8839	0.640808	0.42175	1.5194	0.128662	0.185527
ENSG00000050628.22	ENST00000356595.8	1340.92	0.775716	0.248111	3.12648	0.00176912	0.00349504
ENSG00000050730.17	ENST00000506753.1	0.622066	-2.71701	3.70329	-0.733674	0.463148	0.559657
ENSG00000050748.19	ENST00000520212.6	203.588	-0.315997	0.195182	-1.61899	0.10545	0.155597
ENSG00000050767.18	ENST00000484750.1	248.343	3.13267	0.311815	10.0466	9.51348e-24	6.04417e-23
ENSG00000050820.18	ENST00000564170.1	20.0852	-1.95756	0.57491	-3.40499	0.000661673	0.00137542
ENSG00000051009.12	ENST00000532797.1	34.6687	-1.49966	0.454046	-3.30289	0.000956928	0.00195373
ENSG00000051108.16	ENST00000568814.1	94.4829	-2.08388	0.334782	-6.22459	4.82831e-10	1.63842e-09
ENSG00000051128.20	ENST00000599808.1	15.1101	-0.900051	0.646414	-1.39237	0.163809	0.229377
ENSG00000051180.18	ENST00000533741.1	159.183	1.19963	0.172481	6.95514	3.52204e-12	1.34351e-11
ENSG00000051341.16	ENST00000683498.1	73.1765	1.35361	0.317554	4.26261	2.02051e-05	4.87906e-05
ENSG00000051382.11	ENST00000485060.1	14.0873	0.301581	0.559469	0.539048	0.589854	0.680523
ENSG00000051596.11	ENST00000505969.1	135.265	-1.36296	0.220646	-6.17712	6.52815e-10	2.19922e-09
ENSG00000051620.12	ENST00000858693.1	428.921	-1.38429	0.136476	-10.1431	3.55691e-24	2.29908e-23
ENSG00000051825.16	ENST00000544217.1	215.782	-0.580352	0.230964	-2.51273	0.01198	0.0210666
ENSG00000052126.18	ENST00000700683.1	753.817	2.60151	0.158243	16.4399	9.90106e-61	1.88024e-59
ENSG00000052723.13	ENST00000369528.9	807.109	-2.10313	0.199998	-10.5158	7.30945e-26	4.99464e-25
ENSG00000052749.15	ENST00000479317.1	49.5526	-1.54499	0.338182	-4.5685	4.91235e-06	1.25207e-05
ENSG00000052795.14	ENST00000504715.1	135.452	0.752568	0.230411	3.26619	0.00109004	0.00220968
ENSG00000052802.14	ENST00000906534.1	228.177	-1.54549	0.244394	-6.32375	2.55293e-10	8.80898e-10
ENSG00000052841.17	ENST00000524936.1	52.4862	0.371753	0.340698	1.09115	0.275206	0.360951
ENSG00000052850.8	ENST00000652299.1	165.497	-0.316213	0.217456	-1.45415	0.145905	0.207134
ENSG00000053108.19	ENST00000510685.1	609.42	1.71707	0.210382	8.1617	3.30343e-16	1.55053e-15
ENSG00000053254.17	ENST00000557261.1	21.0231	0.734753	0.533998	1.37595	0.168838	0.235449
ENSG00000053328.10	ENST00000490043.1	103.353	0.954848	0.458413	2.08294	0.0372564	0.0602256
ENSG00000053371.14	ENST00000492217.1	241.107	-0.926491	0.210541	-4.40051	1.07995e-05	2.67011e-05
ENSG00000053372.6	ENST00000479559.1	125.856	-2.47098	0.250945	-9.84671	7.0825e-23	4.36234e-22
ENSG00000053438.11	ENST00000647955.1	4.0426	1.70531	2.33999	0.728771	0.466142	0.562713
ENSG00000053747.17	ENST00000586709.1	4.41375	-0.22148	1.21623	-0.182104	0.855501	0.919159
ENSG00000053770.13	ENST00000556377.1	90.7889	-1.59449	0.357881	-4.45536	8.37524e-06	2.09103e-05
ENSG00000053900.12	ENST00000507925.1	33.0052	1.35833	0.39405	3.44711	0.000566615	0.0011869
ENSG00000053918.21	ENST00000380776.5	899.769	2.1143	0.363219	5.82101	5.84947e-09	1.84574e-08
ENSG00000054116.13	ENST00000462715.1	337.235	-2.1947	0.152736	-14.3692	8.07059e-47	1.06518e-45
ENSG00000054118.16	ENST00000466743.1	496.23	-1.01505	0.187233	-5.42131	5.91638e-08	1.741e-07
ENSG00000054179.13	ENST00000460614.1	4.45802	0.250476	1.78676	0.140184	0.888514	0.946408
ENSG00000054219.12	ENST00000471164.1	0.700804	1.70657	5.0505	0.337901	0.735438	0.813341
ENSG00000054267.23	ENST00000462969.1	47.0186	0.276143	0.4125	0.669438	0.503216	0.598418
ENSG00000054277.14	ENST00000478849.1	774.273	-1.34311	0.205901	-6.52308	6.8877e-11	2.45294e-10
ENSG00000054282.17	ENST00000491888.1	42.6668	1.14768	0.476592	2.40809	0.0160363	0.0276301
ENSG00000054392.14	ENST00000367009.2	171.307	1.5016	0.190747	7.8722	3.48452e-15	1.56022e-14
ENSG00000054523.21	ENST00000495136.1	54.763	2.00531	0.322266	6.22252	4.89231e-10	1.65943e-09
ENSG00000054598.9	ENST00000645831.2	1675.21	-3.78579	0.137359	-27.5612	3.24941e-167	3.49867e-165
ENSG00000054611.15	ENST00000441936.5	188.459	2.34505	0.286422	8.18739	2.6696e-16	1.25816e-15
ENSG00000054654.20	ENST00000557307.1	33.0994	-0.663462	0.423869	-1.56525	0.117523	0.17134
ENSG00000054690.15	ENST00000559168.1	118.191	0.332652	0.282882	1.17594	0.239619	0.320256
ENSG00000054793.15	ENST00000477492.1	21.487	0.00171892	0.512706	0.00335265	0.997325	0.998117
ENSG00000054965.12	ENST00000632101.1	1634.19	2.61254	0.12887	20.2727	2.24045e-91	7.88056e-90
ENSG00000054967.14	ENST00000545886.1	141.633	-0.195381	0.308667	-0.632982	0.526745	0.621677
ENSG00000055044.12	ENST00000478508.1	164.622	1.16363	0.357133	3.25826	0.00112097	0.00226899
ENSG00000055070.18	ENST00000913786.1	1355.38	-1.40514	0.155454	-9.03893	1.58217e-19	8.54074e-19
ENSG00000055118.19	ENST00000683359.1	2.03071	-1.18467	2.5953	-0.456468	0.648054	0.733844
ENSG00000055130.19	ENST00000660013.1	943.591	1.03405	0.146051	7.08006	1.44088e-12	5.62592e-12
ENSG00000055147.20	ENST00000518946.1	31.6678	-1.35105	0.442132	-3.05576	0.00224494	0.00437873
ENSG00000055163.22	ENST00000520960.2	129.201	-1.49397	0.25317	-5.90104	3.61211e-09	1.1567e-08
ENSG00000055208.21	ENST00000470466.5	3089.99	0.0105086	0.175811	0.0597719	0.952337	0.966427
ENSG00000055211.15	ENST00000433539.1	102.494	0.778	0.29612	2.62731	0.00860617	0.015468
ENSG00000055332.20	ENST00000681516.1	1332.84	-0.958003	0.174504	-5.48985	4.02266e-08	1.19777e-07
ENSG00000055483.21	ENST00000592326.1	87.4178	-0.604662	0.297047	-2.03558	0.0417927	0.0669903
ENSG00000055609.21	ENST00000558665.2	1277.17	-0.116123	0.139377	-0.833155	0.404757	0.502542
ENSG00000055732.14	ENST00000474447.1	85.0177	0.631107	0.303386	2.08021	0.0375062	0.0606047
ENSG00000055813.7	ENST00000963881.1	67.4964	2.98692	0.474264	6.29801	3.01489e-10	1.0359e-09
ENSG00000055917.18	ENST00000440577.5	3031.95	0.420568	0.131732	3.19261	0.00140995	0.00282101
ENSG00000055950.18	ENST00000493646.1	301.346	-3.72105	0.275958	-13.4841	1.94026e-41	2.2186e-40
ENSG00000055955.18	ENST00000471505.1	3.81833	0.744773	1.17487	0.633921	0.526132	0.621053
ENSG00000055957.12	ENST00000494705.1	12.9298	0.26279	2.22991	0.117848	0.906188	0.948885
ENSG00000056050.8	ENST00000506125.1	136.343	-1.96014	0.358791	-5.46318	4.67688e-08	1.38541e-07
ENSG00000056097.17	ENST00000502988.5	661.514	-0.821236	0.185537	-4.42628	9.58741e-06	2.38055e-05
ENSG00000056277.17	ENST00000930023.1	689.789	0.919881	0.200234	4.59403	4.34772e-06	1.11271e-05
ENSG00000056291.20	ENST00000506359.1	0.896984	0.262789	3.77684	0.0695792	0.944529	0.961155
ENSG00000056487.18	ENST00000491522.1	4.80093	0.0384622	1.19592	0.0321612	0.974343	0.979179
ENSG00000056586.17	ENST00000398671.2	121.394	-1.68129	0.242565	-6.9313	4.16994e-12	1.58544e-11
ENSG00000056736.11	ENST00000899724.1	99.3382	-0.376481	0.334803	-1.12449	0.260807	0.344955
ENSG00000056972.22	ENST00000699907.1	47.6828	-1.3487	0.386351	-3.49086	0.000481475	0.00101608
ENSG00000056998.22	ENST00000453106.1	91.5569	0.578057	0.279363	2.0692	0.0385277	0.0621252
ENSG00000057019.17	ENST00000496736.1	41.3819	-1.0475	0.377002	-2.77851	0.00546084	0.0100897
ENSG00000057252.14	ENST00000540564.5	891.79	-0.254682	0.0965695	-2.6373	0.00835694	0.0150495
ENSG00000057294.19	ENST00000546769.1	50.1115	-3.21641	0.513044	-6.26926	3.62761e-10	1.24027e-09
ENSG00000057468.7	ENST00000263187.4	693.6	1.87593	0.19731	9.5075	1.95297e-21	1.13549e-20
ENSG00000057593.15	ENST00000473085.1	5.65723	0.26279	2.39303	0.109815	0.912556	0.948924
ENSG00000057608.19	ENST00000479928.1	964.157	-2.81038	0.161275	-17.426	5.24108e-68	1.17969e-66
ENSG00000057663.17	ENST00000475645.1	257.956	0.199638	0.238081	0.838528	0.401734	0.499465
ENSG00000057704.14	ENST00000896389.1	212.837	1.39977	0.181247	7.723	1.13626e-14	4.94608e-14
ENSG00000057757.11	ENST00000374524.1	455.87	-2.15729	0.187376	-11.5131	1.13279e-30	9.15632e-30
ENSG00000057935.15	ENST00000482875.5	111.932	0.0371657	0.223935	0.165966	0.868183	0.92943
ENSG00000058056.11	ENST00000680930.1	28.3297	-1.61188	0.483154	-3.33616	0.000849428	0.00174413
ENSG00000058063.18	ENST00000475636.2	405.121	-0.591823	0.225095	-2.62921	0.00855834	0.0153879
ENSG00000058085.16	ENST00000476255.1	3.26589	0.265431	2.37966	0.111542	0.911187	0.948885
ENSG00000058262.12	ENST00000699284.1	957.552	-2.63719	0.162488	-16.2301	3.09199e-59	5.67905e-58
ENSG00000058272.20	ENST00000551781.2	128.929	-0.763944	0.375508	-2.03443	0.0419086	0.0671617
ENSG00000058404.22	ENST00000427209.1	354.141	1.72886	0.271273	6.37313	1.85215e-10	6.43765e-10
ENSG00000058453.18	ENST00000498688.5	42.959	2.20361	0.395515	5.5715	2.52557e-08	7.63795e-08
ENSG00000058600.17	ENST00000565117.1	121.445	-0.39274	0.243467	-1.61311	0.10672	0.157281
ENSG00000058668.17	ENST00000484746.1	739.308	-0.994001	0.121361	-8.19042	2.6032e-16	1.22744e-15
ENSG00000058673.17	ENST00000480354.1	158.493	-2.14192	0.259753	-8.24596	1.63836e-16	7.79452e-16
ENSG00000058729.12	ENST00000508991.1	68.5783	-1.26243	0.302945	-4.16719	3.08376e-05	7.33e-05
ENSG00000058799.16	ENST00000472983.1	133.217	-0.42878	0.257697	-1.66389	0.096134	0.142989
ENSG00000058804.13	ENST00000923528.1	2633.05	-0.0132904	0.129897	-0.102315	0.918506	0.949783
ENSG00000059122.18	ENST00000344592.9	257.587	-0.368245	0.226828	-1.62346	0.104492	0.15429
ENSG00000059145.20	ENST00000562537.1	83.1608	-0.836634	0.306103	-2.73317	0.00627271	0.0115008
ENSG00000059377.20	ENST00000473948.6	57.2652	0.164498	0.311863	0.52747	0.597867	0.688014
ENSG00000059378.14	ENST00000489383.1	7.39485	-2.32235	1.13487	-2.04637	0.0407203	0.0653864
ENSG00000059573.10	ENST00000485428.1	402.21	-2.18457	0.141829	-15.4029	1.56529e-53	2.49765e-52
ENSG00000059588.11	ENST00000471918.1	52.1759	-0.315105	0.407748	-0.772793	0.439645	0.536143
ENSG00000059691.13	ENST00000515490.1	107.138	-0.83187	0.321083	-2.59083	0.00957459	0.0170914
ENSG00000059758.9	ENST00000549899.1	27.8289	-0.28822	0.458519	-0.62859	0.529618	0.624444
ENSG00000059769.21	ENST00000905076.1	597.134	-0.532364	0.154544	-3.44474	0.000571609	0.00119657
ENSG00000059804.19	ENST00000469295.1	30.4076	-1.67909	0.62738	-2.67635	0.00744279	0.0135047
ENSG00000059915.18	ENST00000479172.5	4.25313	1.84087	1.57142	1.17147	0.241411	0.322336
ENSG00000060069.19	ENST00000299543.9	258.875	-0.25538	0.207385	-1.23143	0.218163	0.294891
ENSG00000060138.14	ENST00000366290.2	1279.74	-3.85466	0.187021	-20.6108	2.19665e-94	8.16607e-93
ENSG00000060140.10	ENST00000538867.5	300.191	1.69024	0.457668	3.69317	0.00022148	0.000484324
ENSG00000060237.20	ENST00000540885.1	462.955	-1.59215	0.18567	-8.57514	9.89651e-18	4.96097e-17
ENSG00000060339.15	ENST00000483264.1	240.255	1.00145	0.181962	5.50364	3.72029e-08	1.11052e-07
ENSG00000060491.18	ENST00000370461.5	301.772	-0.51153	0.241156	-2.12116	0.0339087	0.0551971
ENSG00000060558.4	ENST00000262958.4	14.6507	0.673344	1.27156	0.52954	0.596431	0.686695
ENSG00000060566.15	ENST00000602257.5	5.13041	0.262786	6.12072	0.0429338	0.965754	0.972157
ENSG00000060642.13	ENST00000674317.1	111.476	-1.1168	0.263137	-4.24419	2.19387e-05	5.28057e-05
ENSG00000060656.21	ENST00000465525.6	254.64	-0.827894	0.250204	-3.30888	0.000936715	0.00191419
ENSG00000060688.14	ENST00000491106.1	155.998	-2.30258	0.263506	-8.73825	2.36753e-18	1.21525e-17
ENSG00000060709.18	ENST00000540658.1	5.42479	0.26279	2.45097	0.107219	0.914615	0.94922
ENSG00000060749.17	ENST00000527788.5	2355.78	-0.787741	0.192026	-4.10226	4.09136e-05	9.6154e-05
ENSG00000060762.21	ENST00000366868.5	284.049	-1.47354	0.176969	-8.32656	8.32284e-17	4.01373e-16
ENSG00000060971.20	ENST00000469600.1	57.5181	-0.863605	0.299564	-2.88287	0.00394067	0.00743397
ENSG00000060982.16	ENST00000355164.3	42.0417	-0.674834	0.362359	-1.86233	0.0625561	0.0968431
ENSG00000061273.19	ENST00000463732.5	12.4074	-0.150127	0.710932	-0.211169	0.832755	0.898965
ENSG00000061337.16	ENST00000265801.6	50.5402	-2.60404	0.426931	-6.09943	1.06447e-09	3.5435e-09
ENSG00000061455.12	ENST00000464424.1	722.454	1.22585	0.172462	7.10795	1.1778e-12	4.61945e-12
ENSG00000061492.12	ENST00000361560.6	2.36058	-3.17995	2.17002	-1.4654	0.142812	0.203318
ENSG00000061656.12	ENST00000454819.1	8.92737	0.445138	0.737769	0.603357	0.546271	0.640691
ENSG00000061676.17	ENST00000492058.1	31.3871	-1.62426	0.533351	-3.04538	0.0023239	0.00452386
ENSG00000061794.14	ENST00000542199.1	392.687	-0.594479	0.141483	-4.20178	2.64821e-05	6.33291e-05
ENSG00000061918.15	ENST00000879916.1	201.593	-1.35917	0.222437	-6.11039	9.93858e-10	3.31447e-09
ENSG00000061936.11	ENST00000535399.1	179.496	0.472903	0.219413	2.15531	0.0311378	0.0510147
ENSG00000061938.22	ENST00000673236.1	242.084	0.0188766	0.296933	0.0635717	0.949311	0.964428
ENSG00000061987.17	ENST00000551397.1	110.975	0.516613	0.276649	1.8674	0.0618464	0.0958589
ENSG00000062038.16	ENST00000568292.1	11.3803	-0.3165	0.995188	-0.318031	0.750462	0.826417
ENSG00000062096.16	ENST00000886825.1	5.96172	0.26279	2.36282	0.111219	0.911443	0.948885
ENSG00000062194.17	ENST00000309096.4	342.495	-0.230303	0.243287	-0.946631	0.343827	0.437279
ENSG00000062282.16	ENST00000605608.1	67.5524	-1.32264	0.651583	-2.02989	0.0423681	0.0678516
ENSG00000062370.18	ENST00000911246.1	224.971	-0.64742	0.261406	-2.47668	0.013261	0.0231455
ENSG00000062485.20	ENST00000548746.5	2398.99	-2.92844	0.0941669	-31.0984	2.53274e-212	4.64622e-210
ENSG00000062524.17	ENST00000569283.1	16.5645	0.650752	0.556691	1.16896	0.242418	0.32354
ENSG00000062582.15	ENST00000934255.1	505.428	-5.0591	0.2756	-18.3567	2.91817e-75	7.65722e-74
ENSG00000062598.19	ENST00000452857.5	149.838	-1.61789	0.219333	-7.37643	1.62585e-13	6.67078e-13
ENSG00000062650.21	ENST00000484070.1	480.021	-0.661622	0.135904	-4.86832	1.12551e-06	3.02707e-06
ENSG00000062716.14	ENST00000710771.1	334.844	-1.64685	0.197216	-8.35049	6.79807e-17	3.29009e-16
ENSG00000062725.11	ENST00000592995.1	104.605	-0.280089	0.285418	-0.981329	0.326431	0.417948
ENSG00000063015.21	ENST00000544224.2	53.4602	0.26279	2.09022	0.125724	0.899951	0.948885
ENSG00000063046.19	ENST00000549592.1	1129.77	-2.40377	0.179818	-13.3678	9.33207e-41	1.04805e-39
ENSG00000063127.16	ENST00000594917.1	76.508	0.50364	0.312463	1.61184	0.106997	0.157647
ENSG00000063169.13	ENST00000602258.1	83.7975	0.0252719	0.331891	0.0761453	0.939304	0.958065
ENSG00000063176.17	ENST00000599748.5	155.664	-0.267344	0.268321	-0.99636	0.319075	0.409816
ENSG00000063177.14	ENST00000549533.1	2040.76	-4.34238	0.206044	-21.0751	1.34741e-98	5.47329e-97
ENSG00000063180.10	ENST00000596080.1	22.2858	-1.25897	0.545019	-2.30995	0.020891	0.0353132
ENSG00000063322.16	ENST00000615911.4	636.506	-1.86424	0.132381	-14.0823	4.87623e-45	6.13937e-44
ENSG00000063438.21	ENST00000507048.1	266.207	-0.331879	0.210222	-1.57871	0.114403	0.167344
ENSG00000063515.3	ENST00000086933.3	53.8556	-3.98474	1.58095	-2.52047	0.0117199	0.0206552
ENSG00000063587.15	ENST00000647705.1	256.242	-1.74312	0.178419	-9.7698	1.51749e-22	9.23475e-22
ENSG00000063601.18	ENST00000493480.1	93.7229	-0.546094	0.324202	-1.68442	0.0920996	0.137477
ENSG00000063660.10	ENST00000466624.1	55.9723	-3.54744	0.460184	-7.70874	1.27064e-14	5.51691e-14
ENSG00000063761.17	ENST00000555217.1	110.26	-1.01026	0.279597	-3.61328	0.000302348	0.000651697
ENSG00000063854.14	ENST00000567398.1	55.0517	-0.663467	0.345608	-1.91971	0.0548944	0.0859779
ENSG00000064012.25	ENST00000696086.1	30.6302	-3.29464	0.634482	-5.19264	2.0733e-07	5.88103e-07
ENSG00000064042.19	ENST00000505705.1	28.2639	-1.41041	0.562037	-2.50946	0.0120916	0.0212491
ENSG00000064102.16	ENST00000538748.1	25.7064	-0.955012	0.496967	-1.92168	0.054646	0.0856297
ENSG00000064115.12	ENST00000544179.1	70.5052	-1.19713	0.320754	-3.73223	0.00018979	0.000418172
ENSG00000064195.7	ENST00000512495.2	14.8415	-0.966993	1.24265	-0.778172	0.436468	0.533061
ENSG00000064199.8	ENST00000529498.1	6.51684	-1.87092	0.998935	-1.87292	0.0610797	0.0947788
ENSG00000064205.12	ENST00000497421.1	1.99472	0.26279	2.69974	0.097339	0.922457	0.950535
ENSG00000064218.6	ENST00000417254.1	0.539005	-3.49811	4.10488	-0.852184	0.394112	0.491587
ENSG00000064225.14	ENST00000465004.1	245.581	1.56725	0.157274	9.96506	2.16747e-23	1.35938e-22
ENSG00000064300.9	ENST00000172229.8	50.7613	-1.628	0.588063	-2.7684	0.00563314	0.0103909
ENSG00000064309.17	ENST00000683597.1	295.126	-0.343315	0.148435	-2.3129	0.0207282	0.0350564
ENSG00000064393.17	ENST00000406875.8	3367.36	0.0259692	0.0837381	0.310125	0.756466	0.831835
ENSG00000064419.15	ENST00000961760.1	1590.65	0.786257	0.0855623	9.1893	3.95416e-20	2.1879e-19
ENSG00000064490.15	ENST00000543118.1	22.7931	-1.18732	0.550909	-2.15521	0.0311453	0.051026
ENSG00000064545.16	ENST00000591443.1	78.1073	-1.20785	0.461235	-2.61873	0.00882589	0.0158389
ENSG00000064601.22	ENST00000606000.1	135.887	-1.67592	0.313061	-5.35336	8.63376e-08	2.51386e-07
ENSG00000064607.18	ENST00000598863.1	324.965	-0.20511	0.173421	-1.18273	0.236917	0.317038
ENSG00000064651.15	ENST00000502849.1	66.7841	-0.577928	0.396374	-1.45804	0.14483	0.205772
ENSG00000064652.12	ENST00000515729.1	23.5199	0.0271816	0.508515	0.0534529	0.957371	0.969762
ENSG00000064655.21	ENST00000458636.2	231.427	0.895083	0.190366	4.7019	2.5775e-06	6.7256e-06
ENSG00000064666.16	ENST00000564572.1	87.5372	-3.50588	0.411052	-8.52904	1.47568e-17	7.34313e-17
ENSG00000064692.21	ENST00000513719.1	22.9105	-0.146656	0.577468	-0.253964	0.799524	0.870326
ENSG00000064703.14	ENST00000475700.1	343.589	-2.49101	0.16373	-15.2141	2.8493e-52	4.38329e-51
ENSG00000064726.11	ENST00000944299.1	1483.99	-0.10565	0.105988	-0.996812	0.318856	0.409557
ENSG00000064763.13	ENST00000550541.1	31.206	-0.0175087	0.429828	-0.0407341	0.967508	0.973591
ENSG00000064787.15	ENST00000690125.1	28.4055	0.814568	0.659895	1.23439	0.217058	0.29362
ENSG00000064835.12	ENST00000350375.7	4.95575	0.26279	2.39977	0.109506	0.912801	0.948996
ENSG00000064886.15	ENST00000530597.1	2.96636	2.70642	2.50736	1.07939	0.280414	0.366753
ENSG00000064932.17	ENST00000587673.5	51.5207	-0.233815	0.359126	-0.651067	0.515003	0.610297
ENSG00000064933.20	ENST00000483293.1	168.963	0.795098	0.244644	3.25002	0.00115396	0.00233224
ENSG00000064961.20	ENST00000585741.1	68.7045	0.283974	0.308226	0.921317	0.356885	0.451719
ENSG00000064989.14	ENST00000479784.1	7.39114	0.340441	0.922766	0.368936	0.712175	0.792073
ENSG00000064995.20	ENST00000691871.1	178.732	-0.286309	0.222416	-1.28726	0.198002	0.271207
ENSG00000064999.17	ENST00000698908.1	625.821	-0.399226	0.165076	-2.41844	0.0155872	0.0269055
ENSG00000065000.21	ENST00000586370.6	968.539	-1.00643	0.15769	-6.38233	1.74412e-10	6.07044e-10
ENSG00000065029.16	ENST00000479226.1	58.7228	-0.115428	0.396245	-0.291304	0.770819	0.844836
ENSG00000065054.15	ENST00000564033.1	87.284	-2.17086	0.35093	-6.18602	6.17006e-10	2.08146e-09
ENSG00000065057.10	ENST00000623977.1	81.8895	-0.535624	0.496442	-1.07893	0.280621	0.366983
ENSG00000065060.18	ENST00000192788.6	683.512	0.0450072	0.0998049	0.450951	0.652025	0.737428
ENSG00000065150.22	ENST00000468620.1	720.719	-3.4312	0.158459	-21.6536	5.62136e-104	2.48782e-102
ENSG00000065154.13	ENST00000483711.1	182.191	-2.31078	0.237179	-9.74276	1.98095e-22	1.20003e-21
ENSG00000065183.17	ENST00000487202.5	341.983	-1.66589	0.179565	-9.27733	1.73774e-20	9.73964e-20
ENSG00000065243.21	ENST00000495119.1	70.0247	-1.4209	0.337371	-4.2117	2.53455e-05	6.07119e-05
ENSG00000065268.12	ENST00000591276.1	106.67	-2.94719	0.370116	-7.96288	1.6808e-15	7.64489e-15
ENSG00000065308.6	ENST00000182527.4	438.874	-0.443558	0.13826	-3.20814	0.00133598	0.00268041
ENSG00000065320.10	ENST00000173229.7	1369.8	1.73597	0.123731	14.0301	1.01988e-44	1.27227e-43
ENSG00000065328.18	ENST00000459751.1	93.3299	-0.481805	0.304163	-1.58404	0.113185	0.165773
ENSG00000065357.21	ENST00000550115.5	13.6508	-2.18335	1.8875	-1.15675	0.247377	0.329337
ENSG00000065361.18	ENST00000546748.1	6.05506	-0.418494	1.30256	-0.321285	0.747994	0.824133
ENSG00000065413.21	ENST00000486006.1	2.66692	0.124687	1.52043	0.0820077	0.934641	0.955433
ENSG00000065427.16	ENST00000566772.1	178.288	-3.37534	0.255844	-13.1929	9.63473e-40	1.04904e-38
ENSG00000065457.12	ENST00000568510.1	271.476	-0.648819	0.183782	-3.53038	0.00041496	0.000881686
ENSG00000065485.21	ENST00000472319.5	174.622	1.11459	0.195867	5.69054	1.26637e-08	3.90853e-08
ENSG00000065491.9	ENST00000942344.1	529.209	0.545499	0.109313	4.99025	6.02999e-07	1.65325e-06
ENSG00000065518.9	ENST00000496588.1	85.3514	-3.94764	0.399766	-9.87487	5.35006e-23	3.31035e-22
ENSG00000065526.13	ENST00000704274.1	4784.21	-1.21146	0.108189	-11.1977	4.18439e-29	3.21873e-28
ENSG00000065534.21	ENST00000692507.1	25.0825	-2.95665	0.791905	-3.73358	0.000188774	0.000416018
ENSG00000065548.20	ENST00000445547.1	387.497	-1.67763	0.23112	-7.25871	3.90788e-13	1.5694e-12
ENSG00000065559.16	ENST00000536413.2	465.092	-1.16284	0.160897	-7.22722	4.92986e-13	1.96919e-12
ENSG00000065600.14	ENST00000478166.5	38.3073	0.405932	0.38147	1.06413	0.287272	0.374454
ENSG00000065609.16	ENST00000523780.1	2.91932	0.262006	1.31781	0.198819	0.842404	0.907474
ENSG00000065613.16	ENST00000946374.1	1838.64	-0.64198	0.192801	-3.32976	0.000869219	0.00178295
ENSG00000065615.15	ENST00000479164.1	113.885	0.500914	0.284324	1.76177	0.0781081	0.11838
ENSG00000065618.22	ENST00000433822.1	2.7756	-3.18695	2.22931	-1.42957	0.152841	0.215793
ENSG00000065621.16	ENST00000498052.1	18.3671	-0.0398173	0.791753	-0.05029	0.959891	0.971182
ENSG00000065665.22	ENST00000466451.1	20.7512	-0.405951	0.610296	-0.665171	0.505941	0.601141
ENSG00000065675.17	ENST00000915288.1	172.254	0.714851	0.211443	3.38082	0.000722712	0.00149567
ENSG00000065717.17	ENST00000587217.5	8.11658	-1.02651	1.00783	-1.01853	0.308427	0.397852
ENSG00000065802.13	ENST00000473306.1	70.9609	-1.54195	0.33775	-4.56536	4.98629e-06	1.27024e-05
ENSG00000065809.14	ENST00000475858.1	31.5327	-2.17818	0.531193	-4.10054	4.12185e-05	9.68515e-05
ENSG00000065833.10	ENST00000901912.1	1027.45	1.12605	0.150004	7.50674	6.0616e-14	2.53709e-13
ENSG00000065882.19	ENST00000475531.1	26.6634	-1.38544	0.473855	-2.92375	0.00345841	0.00657729
ENSG00000065883.19	ENST00000465643.1	340.177	-2.04766	0.174962	-11.7034	1.22385e-31	1.02122e-30
ENSG00000065911.13	ENST00000677558.1	367.959	-2.07402	0.166194	-12.4795	9.65645e-36	9.1995e-35
ENSG00000065923.11	ENST00000491894.4	55.8035	-0.0539908	0.304045	-0.177575	0.859057	0.922103
ENSG00000065970.10	ENST00000963778.1	253.449	-1.24086	0.187072	-6.63307	3.28769e-11	1.19216e-10
ENSG00000065978.20	ENST00000332220.10	4829.29	-2.10611	0.119776	-17.5837	3.28475e-69	7.54368e-68
ENSG00000065989.17	ENST00000590407.1	52.7115	-0.150251	0.397667	-0.377832	0.705555	0.786155
ENSG00000066027.13	ENST00000498123.5	231.944	2.25238	0.211735	10.6377	1.98988e-26	1.39031e-25
ENSG00000066032.19	ENST00000467488.1	3.11371	0.26279	3.00108	0.087565	0.930222	0.953298
ENSG00000066044.16	ENST00000595499.1	109.618	-2.81171	0.281575	-9.98566	1.7613e-23	1.1081e-22
ENSG00000066056.16	ENST00000492874.1	7.05741	0.26279	2.29926	0.114293	0.909005	0.948885
ENSG00000066084.14	ENST00000552328.1	57.3801	-1.41845	0.451564	-3.14119	0.00168261	0.00333314
ENSG00000066117.16	ENST00000549526.1	324.528	-2.53306	0.206439	-12.2703	1.30822e-34	1.20595e-33
ENSG00000066135.14	ENST00000472265.1	34.487	-0.842485	0.455997	-1.84757	0.0646649	0.0998083
ENSG00000066136.22	ENST00000483091.1	62.2941	-2.13752	0.369923	-5.77829	7.54626e-09	2.36376e-08
ENSG00000066230.12	ENST00000644203.1	317.708	-3.2748	0.236782	-13.8304	1.67026e-43	2.02209e-42
ENSG00000066248.16	ENST00000489127.1	11.03	-1.4514	0.825672	-1.75784	0.0787749	0.119306
ENSG00000066279.20	ENST00000679766.1	856.165	-1.05119	0.226608	-4.63881	3.50421e-06	9.03842e-06
ENSG00000066322.16	ENST00000855992.1	235.84	-2.44882	0.220861	-11.0876	1.44101e-28	1.08705e-27
ENSG00000066336.14	ENST00000713543.1	683.27	-0.0145938	0.35885	-0.0406683	0.96756	0.973629
ENSG00000066379.16	ENST00000932219.1	65.8173	-3.22606	0.409227	-7.88331	3.18826e-15	1.43019e-14
ENSG00000066382.18	ENST00000524667.5	177.505	1.52649	0.200038	7.63101	2.32924e-14	9.96674e-14
ENSG00000066422.8	ENST00000704114.1	311.812	-1.60235	0.224127	-7.14929	8.72264e-13	3.44353e-12
ENSG00000066427.26	ENST00000526872.3	166.155	0.955192	0.219511	4.35146	1.35237e-05	3.31465e-05
ENSG00000066455.14	ENST00000555793.1	13.3069	-1.21444	0.771381	-1.57437	0.115402	0.168603
ENSG00000066468.25	ENST00000467584.1	16.574	-1.7032	0.616942	-2.76071	0.00576759	0.0106238
ENSG00000066557.7	ENST00000920867.1	908.016	0.249744	0.180894	1.38061	0.1674	0.233717
ENSG00000066583.13	ENST00000954509.1	414.775	-2.33763	0.145883	-16.024	8.69265e-58	1.54419e-56
ENSG00000066629.20	ENST00000553313.1	38.2856	-1.03134	0.384846	-2.67989	0.0073647	0.0133709
ENSG00000066651.21	ENST00000444229.1	493.398	3.16825	0.180784	17.525	9.22709e-69	2.09928e-67
ENSG00000066654.15	ENST00000966612.1	468.705	-3.05071	0.170234	-17.9207	8.13042e-72	1.97829e-70
ENSG00000066697.16	ENST00000489377.1	111.171	-0.586273	0.259188	-2.26196	0.0236999	0.0396886
ENSG00000066735.17	ENST00000926957.1	448.295	-1.08455	0.220966	-4.90822	9.19088e-07	2.48714e-06
ENSG00000066739.13	ENST00000555263.1	23.2621	-0.632997	0.466119	-1.35802	0.174459	0.242265
ENSG00000066777.10	ENST00000518290.1	119.563	-0.44584	0.250121	-1.7825	0.0746678	0.113774
ENSG00000066813.15	ENST00000564855.1	1.9587	0.26279	2.97595	0.0883044	0.929635	0.953057
ENSG00000066827.17	ENST00000521673.5	253.039	0.252453	0.20961	1.20439	0.228437	0.306956
ENSG00000066855.17	ENST00000518352.1	230.013	-0.818742	0.18327	-4.46742	7.9169e-06	1.98028e-05
ENSG00000066923.20	ENST00000479359.1	27.7582	-2.76561	1.72511	-1.60315	0.108902	0.160154
ENSG00000066926.14	ENST00000591977.5	96.6434	-0.881486	0.321701	-2.74008	0.00614243	0.0112732
ENSG00000066933.18	ENST00000568781.1	102.977	0.0544026	0.269635	0.201764	0.840101	0.905497
ENSG00000067057.20	ENST00000381072.5	492.117	-0.564863	0.134273	-4.20683	2.58974e-05	6.19766e-05
ENSG00000067064.13	ENST00000381344.8	859.547	-1.16749	0.184836	-6.31637	2.67779e-10	9.22896e-10
ENSG00000067066.18	ENST00000494508.1	3.99749	-1.19538	1.29483	-0.9232	0.355903	0.450606
ENSG00000067082.16	ENST00000461124.1	178.003	-3.1644	0.282358	-11.207	3.7658e-29	2.90172e-28
ENSG00000067113.18	ENST00000502907.1	39.2222	0.874375	0.361295	2.42011	0.0155156	0.0267921
ENSG00000067141.18	ENST00000558886.1	105.919	-1.97683	0.289188	-6.8358	8.15471e-12	3.05189e-11
ENSG00000067167.9	ENST00000884667.1	1293.19	-1.78257	0.188207	-9.47132	2.76329e-21	1.59749e-20
ENSG00000067177.16	ENST00000929439.1	1104.38	0.281645	0.0957515	2.94141	0.0032672	0.00623655
ENSG00000067182.10	ENST00000698337.1	154.472	-1.67019	0.251994	-6.62789	3.4053e-11	1.23386e-10
ENSG00000067191.18	ENST00000582544.1	18.6938	0.677978	0.635812	1.06632	0.28628	0.373318
ENSG00000067208.18	ENST00000492613.1	548.371	2.54314	0.179823	14.1425	2.07756e-45	2.64305e-44
ENSG00000067221.15	ENST00000561480.1	15.2099	-0.980197	0.647506	-1.5138	0.130076	0.187303
ENSG00000067225.22	ENST00000565143.1	5353.95	-3.99629	0.156115	-25.5983	1.59332e-144	1.25118e-142
ENSG00000067248.12	ENST00000513447.1	62.579	-0.452346	0.299537	-1.51015	0.131005	0.188487
ENSG00000067334.14	ENST00000496672.1	287.772	-2.07517	0.222168	-9.34052	9.58625e-21	5.43123e-20
ENSG00000067365.16	ENST00000569597.1	28.0609	0.737804	0.392584	1.87935	0.0601963	0.0935258
ENSG00000067369.15	ENST00000571145.1	150.331	0.0984939	0.203445	0.484129	0.628294	0.716077
ENSG00000067445.23	ENST00000427099.1	123.333	-1.35525	0.235647	-5.75118	8.86206e-09	2.76525e-08
ENSG00000067533.7	ENST00000366932.4	869.752	-0.557267	0.151419	-3.6803	0.000232959	0.00050829
ENSG00000067560.15	ENST00000265538.3	73.6901	-4.90635	0.64502	-7.6065	2.81608e-14	1.19911e-13
ENSG00000067596.13	ENST00000587574.1	338.783	-2.14692	0.179141	-11.9846	4.28099e-33	3.74431e-32
ENSG00000067606.18	ENST00000472017.1	61.2946	-0.719237	0.339152	-2.12069	0.0339477	0.0552538
ENSG00000067704.11	ENST00000488777.1	178.079	-2.91665	0.252735	-11.5404	8.25663e-31	6.70068e-30
ENSG00000067715.16	ENST00000704719.1	473.625	2.54975	0.169485	15.0441	3.77484e-51	5.64028e-50
ENSG00000067829.21	ENST00000454076.5	277.457	-1.32975	0.184547	-7.2055	5.78326e-13	2.30221e-12
ENSG00000067840.14	ENST00000468491.1	364.882	0.694174	0.353412	1.96421	0.049506	0.0783062
ENSG00000067842.20	ENST00000705863.1	11.8243	-0.0617348	0.747581	-0.0825795	0.934186	0.955247
ENSG00000067900.9	ENST00000584687.1	20.0575	-1.39481	0.54431	-2.56252	0.0103915	0.0184559
ENSG00000067955.16	ENST00000568858.1	206.188	-1.26772	0.234852	-5.39796	6.74018e-08	1.97587e-07
ENSG00000067992.18	ENST00000688031.1	228.759	-0.5546	0.171636	-3.23126	0.00123245	0.00248317
ENSG00000068024.19	ENST00000445704.1	35.8445	-0.134327	0.367473	-0.365543	0.714706	0.794266
ENSG00000068078.21	ENST00000469068.1	101.199	0.371529	0.33069	1.1235	0.261227	0.345452
ENSG00000068079.8	ENST00000546325.1	10.6785	-0.737176	1.4877	-0.495515	0.620236	0.708834
ENSG00000068097.17	ENST00000587314.1	107.098	-1.91168	0.236695	-8.07656	6.66211e-16	3.08874e-15
ENSG00000068120.15	ENST00000585909.1	388.506	-2.3355	0.222777	-10.4836	1.02789e-25	6.99112e-25
ENSG00000068137.16	ENST00000592974.5	28.7294	-1.34474	0.559721	-2.40251	0.016283	0.0280136
ENSG00000068305.20	ENST00000561125.2	822.943	-1.66229	0.13005	-12.7819	2.06853e-37	2.09794e-36
ENSG00000068308.16	ENST00000481142.1	118.359	0.241794	0.256422	0.942953	0.345705	0.439329
ENSG00000068323.18	ENST00000481606.1	23.6496	-1.89761	0.571036	-3.3231	0.000890225	0.00182382
ENSG00000068354.17	ENST00000941579.1	369.319	0.258203	0.141669	1.82258	0.0683674	0.105034
ENSG00000068366.22	ENST00000505855.1	132.675	1.03374	0.218032	4.74123	2.12427e-06	5.58452e-06
ENSG00000068383.20	ENST00000498337.1	659.401	0.0188903	0.21411	0.0882273	0.929696	0.953096
ENSG00000068394.12	ENST00000916259.1	163.575	-0.71632	0.198673	-3.60552	0.000311534	0.000670689
ENSG00000068400.15	ENST00000703885.1	11.9198	1.72208	0.657714	2.61828	0.00883737	0.015858
ENSG00000068438.16	ENST00000466371.5	210.847	-1.60549	0.206185	-7.78667	6.87983e-15	3.0306e-14
ENSG00000068489.13	ENST00000582004.1	39.0907	-1.39119	0.435776	-3.19245	0.00141074	0.00282253
ENSG00000068615.21	ENST00000646181.1	64.3711	-2.43038	0.386356	-6.29051	3.16424e-10	1.08574e-09
ENSG00000068650.20	ENST00000614170.1	479.244	-1.6078	0.205248	-7.83349	4.74524e-15	2.10974e-14
ENSG00000068654.18	ENST00000471427.1	46.4242	-1.52816	0.386397	-3.9549	7.65682e-05	0.000175595
ENSG00000068697.8	ENST00000483117.1	305.765	-3.69339	0.243828	-15.1475	7.86565e-52	1.19862e-50
ENSG00000068724.19	ENST00000698499.1	23.6264	0.387855	0.492943	0.786815	0.43139	0.527999
ENSG00000068745.16	ENST00000453202.1	122.374	-0.369027	0.258555	-1.42726	0.153504	0.216567
ENSG00000068781.21	ENST00000470560.1	6.57217	2.43829	1.45851	1.67176	0.0945713	0.140848
ENSG00000068784.14	ENST00000475073.5	604.465	2.60762	0.198611	13.1293	2.23636e-39	2.4059e-38
ENSG00000068796.20	ENST00000509624.1	55.5993	-1.32	0.384945	-3.42905	0.000605693	0.00126421
ENSG00000068878.16	ENST00000478731.1	72.8124	-0.795748	0.331455	-2.40077	0.0163604	0.0281376
ENSG00000068885.16	ENST00000484963.5	197.635	1.03467	0.203123	5.09381	3.50934e-07	9.78826e-07
ENSG00000068903.22	ENST00000496069.1	15.5346	-1.74744	0.823728	-2.12138	0.0338897	0.0551707
ENSG00000068912.16	ENST00000684835.1	181.392	-0.119389	0.225692	-0.528993	0.59681	0.687048
ENSG00000068971.15	ENST00000532850.1	39.9669	-0.530137	0.498528	-1.06341	0.287598	0.374825
ENSG00000068976.15	ENST00000462303.1	69.2843	3.29042	1.68668	1.95083	0.0510776	0.0805394
ENSG00000069011.16	ENST00000265340.12	252.111	-2.94891	0.231983	-12.7118	5.08717e-37	5.0285e-36
ENSG00000069020.19	ENST00000485768.1	7.93659	-0.398142	0.897791	-0.443469	0.657427	0.742349
ENSG00000069188.17	ENST00000392650.8	1206.4	1.12315	0.173384	6.47783	9.30493e-11	3.28982e-10
ENSG00000069206.15	ENST00000441335.6	2.94338	0.26279	2.63898	0.0995804	0.920677	0.950181
ENSG00000069248.13	ENST00000485119.1	115.063	-1.36593	0.357128	-3.82477	0.000130897	0.000293458
ENSG00000069275.14	ENST00000464938.1	455.326	-3.25841	0.211166	-15.4305	1.0201e-53	1.6356e-52
ENSG00000069329.20	ENST00000563884.1	141.652	-3.4622	0.313129	-11.0568	2.03237e-28	1.52614e-27
ENSG00000069345.13	ENST00000569553.1	57.8401	-2.25225	0.398818	-5.6473	1.62989e-08	4.99392e-08
ENSG00000069399.15	ENST00000477832.1	2.97321	-2.54679	1.9343	-1.31664	0.187958	0.258947
ENSG00000069424.16	ENST00000671076.1	90.249	-1.40962	0.386547	-3.6467	0.000265632	0.000576133
ENSG00000069482.8	ENST00000933458.1	471.717	-1.889	0.273169	-6.91512	4.67472e-12	1.77315e-11
ENSG00000069493.15	ENST00000487752.1	67.6711	1.29064	0.331015	3.89904	9.65767e-05	0.000219319
ENSG00000069509.7	ENST00000950132.1	182.263	-0.478125	0.197862	-2.41646	0.0156724	0.0270442
ENSG00000069535.15	ENST00000962443.1	5.95389	0.105063	1.0843	0.0968943	0.92281	0.950659
ENSG00000069667.16	ENST00000560300.1	1663.04	4.05913	0.103965	39.0432	0	0
ENSG00000069696.7	ENST00000528733.1	4.72432	2.83928	1.22062	2.32611	0.0200129	0.033923
ENSG00000069702.12	ENST00000529608.1	41.6152	-1.26581	0.362879	-3.48824	0.00048621	0.00102562
ENSG00000069812.12	ENST00000377834.8	63.8282	-1.63675	0.353882	-4.62513	3.74371e-06	9.6321e-06
ENSG00000069849.12	ENST00000484727.1	466.854	-1.47537	0.194099	-7.60112	2.93588e-14	1.24909e-13
ENSG00000069869.18	ENST00000508871.5	457.432	0.644042	0.2148	2.99833	0.00271465	0.0052322
ENSG00000069943.11	ENST00000562751.1	17.5669	-1.26677	0.58945	-2.14906	0.0316294	0.0517606
ENSG00000069956.15	ENST00000955406.1	720.743	-0.338338	0.221418	-1.52805	0.1265	0.182921
ENSG00000069998.13	ENST00000486462.1	162.813	-1.41082	0.290079	-4.86356	1.15295e-06	3.09828e-06
ENSG00000070010.20	ENST00000474226.1	405.224	-1.40253	0.183823	-7.62976	2.35198e-14	1.00616e-13
ENSG00000070018.10	ENST00000540527.5	239.761	-0.740757	0.179723	-4.12166	3.76148e-05	8.86515e-05
ENSG00000070019.6	ENST00000535803.1	35.5389	1.70552	2.08981	0.816113	0.414435	0.511584
ENSG00000070031.4	ENST00000176195.4	4.36312	1.70577	2.46018	0.693352	0.488089	0.583765
ENSG00000070047.14	ENST00000941193.1	815.581	0.646727	0.147036	4.39843	1.09038e-05	2.69487e-05
ENSG00000070061.17	ENST00000675370.1	92.9172	-1.42519	0.259421	-5.49375	3.9349e-08	1.17242e-07
ENSG00000070081.19	ENST00000527580.5	123.475	0.0302834	0.261966	0.1156	0.907969	0.948885
ENSG00000070087.16	ENST00000423691.2	922.164	-3.08934	0.148132	-20.8553	1.36472e-96	5.25253e-95
ENSG00000070159.15	ENST00000447271.1	50.6112	-1.93334	0.408405	-4.73388	2.20271e-06	5.78355e-06
ENSG00000070182.22	ENST00000542694.2	4.82433	-2.15366	1.29739	-1.65999	0.0969171	0.14407
ENSG00000070193.6	ENST00000912799.1	2.74372	1.70588	2.65011	0.643699	0.51977	0.614924
ENSG00000070214.18	ENST00000436716.1	296.259	-1.91728	0.251373	-7.62723	2.39851e-14	1.02572e-13
ENSG00000070269.15	ENST00000555046.1	127.931	0.0539346	0.224266	0.240494	0.809947	0.879378
ENSG00000070366.15	ENST00000574501.1	393.457	-1.89177	0.191858	-9.86025	6.18929e-23	3.82035e-22
ENSG00000070367.18	ENST00000554011.5	533.677	-0.414399	0.19548	-2.1199	0.0340143	0.055352
ENSG00000070371.17	ENST00000458188.2	113.219	1.60848	0.275767	5.83274	5.45247e-09	1.72459e-08
ENSG00000070388.12	ENST00000591390.1	8.99562	0.851892	1.49633	0.569321	0.569139	0.662462
ENSG00000070404.11	ENST00000605925.3	13.3958	-1.42211	0.772858	-1.84006	0.0657591	0.101346
ENSG00000070413.22	ENST00000467659.1	533.193	-0.601999	0.141625	-4.25065	2.13153e-05	5.13838e-05
ENSG00000070423.19	ENST00000586749.1	209.354	-0.867987	0.325909	-2.66328	0.00773826	0.0140029
ENSG00000070444.16	ENST00000573384.1	74.9303	-0.0236502	0.285884	-0.0827264	0.934069	0.955197
ENSG00000070476.16	ENST00000959114.1	1110.15	-0.308643	0.0968866	-3.18561	0.00144451	0.00288607
ENSG00000070495.16	ENST00000905303.1	703.431	-1.76083	0.163803	-10.7497	5.94842e-27	4.22252e-26
ENSG00000070501.13	ENST00000519094.5	30.9401	-0.57559	0.471466	-1.22085	0.222142	0.299624
ENSG00000070526.16	ENST00000585633.1	21.0082	-0.733686	1.88702	-0.388808	0.697418	0.778934
ENSG00000070540.14	ENST00000590402.1	2.44909	-2.74533	2.04127	-1.34491	0.178654	0.24742
ENSG00000070601.10	ENST00000359927.3	26.0825	0.484939	0.730735	0.663632	0.506926	0.602147
ENSG00000070610.15	ENST00000378088.1	98.5008	-0.353149	0.244497	-1.44439	0.148628	0.210487
ENSG00000070614.16	ENST00000521752.1	43.005	-2.4597	0.470504	-5.2278	1.71538e-07	4.89636e-07
ENSG00000070669.18	ENST00000487714.1	170.724	-2.20432	0.256989	-8.57752	9.69376e-18	4.86058e-17
ENSG00000070718.14	ENST00000522320.1	38.9035	-0.35578	0.3639	-0.977689	0.328228	0.419957
ENSG00000070729.14	ENST00000567568.1	6.17995	0.26279	2.42677	0.108288	0.913767	0.94922
ENSG00000070731.12	ENST00000586520.5	35.7781	0.382578	0.453912	0.842846	0.399314	0.49698
ENSG00000070748.19	ENST00000638282.1	6.7422	0.26279	2.38028	0.110403	0.91209	0.948885
ENSG00000070756.18	ENST00000519363.1	1922.31	-3.66637	0.154611	-23.7136	2.61304e-124	1.58207e-122
ENSG00000070759.18	ENST00000937751.1	2645.94	1.56902	0.0981925	15.9791	1.78834e-57	3.1495e-56
ENSG00000070761.9	ENST00000562443.1	96.8188	-4.46067	0.535649	-8.32759	8.25043e-17	3.97927e-16
ENSG00000070770.11	ENST00000676463.1	1149.84	-2.59917	0.136352	-19.0622	5.20412e-81	1.52972e-79
ENSG00000070778.14	ENST00000553531.1	20.1357	-1.22322	0.652476	-1.87473	0.0608302	0.0944195
ENSG00000070785.18	ENST00000486491.1	277.41	1.28283	0.147432	8.70118	3.2846e-18	1.67614e-17
ENSG00000070808.18	ENST00000507995.1	56.0968	0.847759	1.36012	0.623299	0.533088	0.627879
ENSG00000070814.23	ENST00000506063.1	178.882	-1.69276	0.232158	-7.29143	3.06673e-13	1.23783e-12
ENSG00000070831.19	ENST00000695862.1	1646.78	-2.26292	0.0926198	-24.4323	7.75611e-132	5.1076e-130
ENSG00000070882.14	ENST00000415952.1	4779.45	1.52996	0.120677	12.6782	7.81458e-37	7.67544e-36
ENSG00000070886.12	ENST00000166244.8	211.25	-0.843913	0.281615	-2.99669	0.00272928	0.00525896
ENSG00000070915.11	ENST00000569002.1	1.70531	1.26908	3.40295	0.372936	0.709196	0.78943
ENSG00000070950.11	ENST00000427329.5	5207.77	2.44033	0.111955	21.7974	2.45565e-105	1.10569e-103
ENSG00000070961.18	ENST00000552275.1	75.3126	-0.756858	0.347011	-2.18108	0.0291778	0.048052
ENSG00000070985.14	ENST00000696290.1	21.6256	1.84787	1.26466	1.46116	0.143971	0.204736
ENSG00000071051.15	ENST00000899661.1	319.585	-0.805722	0.170636	-4.72187	2.33691e-06	6.12068e-06
ENSG00000071054.18	ENST00000477711.1	72.2774	-1.90919	0.37574	-5.08115	3.75158e-07	1.04439e-06
ENSG00000071073.14	ENST00000495056.2	14.4321	-0.53699	0.626977	-0.856474	0.391735	0.489107
ENSG00000071082.12	ENST00000409000.5	1013.41	-3.31219	0.137593	-24.0725	4.85802e-128	3.08862e-126
ENSG00000071127.19	ENST00000699793.1	445.272	-3.56705	0.180771	-19.7325	1.13523e-86	3.69745e-85
ENSG00000071189.22	ENST00000471744.1	339.738	1.30106	0.207628	6.2663	3.6972e-10	1.26296e-09
ENSG00000071205.13	ENST00000510379.1	524.843	2.05607	0.110767	18.5621	6.50972e-77	1.77345e-75
ENSG00000071242.14	ENST00000506565.1	2728.34	3.25822	0.111484	29.2259	9.10027e-188	1.29176e-185
ENSG00000071243.17	ENST00000497502.1	116.356	-1.56339	0.383521	-4.07642	4.57337e-05	0.000107073
ENSG00000071246.11	ENST00000554743.1	25.2482	-2.04176	0.549998	-3.71231	0.00020538	0.000450749
ENSG00000071282.13	ENST00000470776.1	21.2286	-0.848603	0.56861	-1.49242	0.13559	0.194326
ENSG00000071462.14	ENST00000855997.1	620.557	-0.0133225	0.152981	-0.0870855	0.930604	0.953504
ENSG00000071537.15	ENST00000555923.1	31.4507	-0.128726	0.504747	-0.255031	0.7987	0.869609
ENSG00000071539.15	ENST00000508430.1	272.84	-2.92829	0.215571	-13.5839	4.99101e-42	5.77596e-41
ENSG00000071553.19	ENST00000484908.2	748.383	-3.05	0.192569	-15.8384	1.68941e-56	2.9106e-55
ENSG00000071564.20	ENST00000587425.5	636.015	-0.909893	0.166604	-5.4614	4.724e-08	1.39884e-07
ENSG00000071575.12	ENST00000483034.1	19.651	-4.5304	0.966793	-4.68601	2.78586e-06	7.24884e-06
ENSG00000071626.18	ENST00000589874.2	610.682	-1.68277	0.190807	-8.81922	1.15257e-18	5.9867e-18
ENSG00000071655.19	ENST00000592965.2	1506.91	-0.387047	0.11845	-3.26762	0.00108457	0.00219925
ENSG00000071794.17	ENST00000481663.1	202.807	-1.55459	0.245126	-6.34199	2.2681e-10	7.84858e-10
ENSG00000071909.19	ENST00000442690.1	727.237	5.79297	1.49268	3.88091	0.000104066	0.000235622
ENSG00000071967.13	ENST00000494587.1	46.3356	1.20389	0.357012	3.37213	0.000745891	0.0015406
ENSG00000072041.19	ENST00000551612.6	264.714	-3.22631	0.23077	-13.9806	2.04693e-44	2.52968e-43
ENSG00000072042.14	ENST00000556692.1	145.822	-1.41428	0.199705	-7.08182	1.4227e-12	5.5569e-12
ENSG00000072062.17	ENST00000587533.1	98.1739	-1.62625	0.321871	-5.05249	4.36089e-07	1.20798e-06
ENSG00000072071.18	ENST00000588677.1	45.4681	-1.0495	0.471107	-2.22774	0.0258978	0.0430622
ENSG00000072080.12	ENST00000874738.1	11.2072	-1.18135	2.19519	-0.538155	0.59047	0.681106
ENSG00000072110.18	ENST00000556432.1	133.312	-2.93943	0.276833	-10.6181	2.45545e-26	1.71007e-25
ENSG00000072121.17	ENST00000557204.1	18.942	-0.174893	0.495129	-0.353227	0.723918	0.80278
ENSG00000072133.13	ENST00000699863.1	146.297	1.2889	0.228022	5.65252	1.58113e-08	4.84759e-08
ENSG00000072134.17	ENST00000584954.1	14.9066	-0.0435075	0.593098	-0.0733564	0.941523	0.959192
ENSG00000072135.14	ENST00000464576.1	44.8473	0.206962	0.421144	0.491428	0.623124	0.711324
ENSG00000072163.21	ENST00000410011.5	318.866	0.41672	0.314937	1.32319	0.185774	0.256279
ENSG00000072195.15	ENST00000403148.6	33.4875	0.593497	0.527471	1.12518	0.260515	0.344641
ENSG00000072201.15	ENST00000513421.5	254.74	1.00021	0.76521	1.3071	0.191177	0.262877
ENSG00000072210.20	ENST00000573505.1	208.019	-1.40651	0.197215	-7.1319	9.89953e-13	3.89774e-12
ENSG00000072274.15	ENST00000698276.1	966.31	-2.5821	0.138678	-18.6194	2.23866e-77	6.16522e-76
ENSG00000072310.19	ENST00000577897.2	121.817	-0.429571	0.273884	-1.56844	0.116778	0.170381
ENSG00000072315.4	ENST00000262839.3	58.5987	1.70546	2.06529	0.825775	0.408932	0.506527
ENSG00000072364.14	ENST00000421773.1	166.163	-0.747609	0.214472	-3.4858	0.000490661	0.00103463
ENSG00000072401.16	ENST00000606483.1	68.9228	-2.94832	0.508877	-5.79377	6.88254e-09	2.16085e-08
ENSG00000072415.11	ENST00000677972.1	223.658	-0.529386	0.194248	-2.72532	0.00642401	0.0117626
ENSG00000072422.18	ENST00000496237.1	14.8408	-2.99119	0.977941	-3.05866	0.0022233	0.00433912
ENSG00000072501.20	ENST00000469129.1	477.377	-1.51179	0.139837	-10.8111	3.05035e-27	2.18672e-26
ENSG00000072506.15	ENST00000684251.1	263.384	-3.92916	0.287501	-13.6666	1.60725e-42	1.88418e-41
ENSG00000072518.24	ENST00000535116.1	50.3467	-0.479103	0.364819	-1.31326	0.189095	0.260367
ENSG00000072571.21	ENST00000932207.1	681.28	-0.646087	0.181796	-3.55392	0.000379531	0.000809098
ENSG00000072682.21	ENST00000481636.1	6.1841	0.262786	6.12072	0.0429338	0.965754	0.972157
ENSG00000072736.19	ENST00000562171.1	1117.18	1.46807	0.10012	14.6631	1.11156e-48	1.55537e-47
ENSG00000072756.19	ENST00000698416.1	175.217	0.0339795	0.220343	0.154212	0.877443	0.937292
ENSG00000072778.21	ENST00000578033.1	78.4922	-0.6771	0.319466	-2.11948	0.0340503	0.0553978
ENSG00000072786.14	ENST00000521322.1	19.741	-0.108377	0.651846	-0.166262	0.867951	0.929247
ENSG00000072803.19	ENST00000518106.1	42.0527	-1.93953	0.466814	-4.15483	3.25532e-05	7.71967e-05
ENSG00000072818.13	ENST00000575415.1	19.0456	3.29056	1.77669	1.85207	0.0640159	0.0988937
ENSG00000072832.15	ENST00000513911.5	13.3672	-1.66961	0.882776	-1.89131	0.0585823	0.0912601
ENSG00000072840.14	ENST00000514919.1	11.6848	-0.419495	0.761002	-0.551241	0.581469	0.673451
ENSG00000072849.12	ENST00000571971.1	164.677	-0.898949	0.189551	-4.74251	2.11089e-06	5.55059e-06
ENSG00000072858.13	ENST00000498152.1	0.659971	2.70547	3.39202	0.797599	0.425103	0.521753
ENSG00000072864.17	ENST00000576502.5	98.618	-0.226049	0.323875	-0.697951	0.485208	0.581106
ENSG00000072952.22	ENST00000526414.5	44.5736	-0.651203	0.757374	-0.859817	0.38989	0.487186
ENSG00000072954.8	ENST00000595452.1	58.1534	1.53614	0.377595	4.06823	4.7372e-05	0.000110692
ENSG00000072958.10	ENST00000592703.1	58.095	-2.50078	0.460656	-5.42874	5.67526e-08	1.67212e-07
ENSG00000073008.17	ENST00000706608.1	577.52	-0.457505	0.109124	-4.19251	2.75888e-05	6.58678e-05
ENSG00000073050.13	ENST00000598422.1	118.277	-1.3167	0.234566	-5.61336	1.98437e-08	6.04383e-08
ENSG00000073060.18	ENST00000545305.1	373.037	-0.542404	0.182735	-2.96826	0.00299493	0.00574329
ENSG00000073067.14	ENST00000415893.1	5.22571	0.26279	2.44401	0.107524	0.914373	0.94922
ENSG00000073111.16	ENST00000468659.1	389.757	-2.81331	0.203431	-13.8293	1.69675e-43	2.05378e-42
ENSG00000073146.17	ENST00000354853.2	239.671	0.0406848	0.824419	0.0493497	0.960641	0.971653
ENSG00000073150.14	ENST00000159647.9	191.89	-1.63152	0.380336	-4.28968	1.7893e-05	4.3396e-05
ENSG00000073169.15	ENST00000380903.7	849.77	0.533782	0.127492	4.18678	2.82938e-05	6.7481e-05
ENSG00000073282.14	ENST00000486398.1	373.055	1.74939	0.781671	2.23802	0.0252198	0.0420198
ENSG00000073331.19	ENST00000505912.1	49.8946	-0.0208273	0.384343	-0.0541894	0.956784	0.969455
ENSG00000073417.16	ENST00000561105.1	22.1243	-0.455336	0.551703	-0.825329	0.409185	0.50673
ENSG00000073464.14	ENST00000674959.1	2.77294	-0.468099	1.28325	-0.364776	0.715279	0.794786
ENSG00000073536.19	ENST00000586869.5	451.562	-0.973186	0.146976	-6.62138	3.55867e-11	1.28846e-10
ENSG00000073578.19	ENST00000507266.1	76.53	-1.74427	0.328565	-5.30874	1.10386e-07	3.19288e-07
ENSG00000073584.21	ENST00000643378.1	638.838	-2.79051	0.163426	-17.075	2.27817e-65	4.88017e-64
ENSG00000073598.6	ENST00000158009.6	2.13359	-1.18503	2.64435	-0.448135	0.654055	0.739341
ENSG00000073614.13	ENST00000540156.1	61.7334	-1.56888	0.34825	-4.50503	6.63623e-06	1.67073e-05
ENSG00000073670.15	ENST00000587773.1	514.269	-0.108374	0.222291	-0.487531	0.625882	0.713782
ENSG00000073711.12	ENST00000872862.1	373.488	1.34047	0.202898	6.60661	3.93214e-11	1.42068e-10
ENSG00000073712.16	ENST00000555546.5	262.071	-2.48558	0.288053	-8.62891	6.19375e-18	3.13046e-17
ENSG00000073737.18	ENST00000450153.1	1.87046	-1.17587	2.88005	-0.408282	0.683066	0.765793
ENSG00000073754.6	ENST00000368174.5	2.33652	0.262786	6.12072	0.0429338	0.965754	0.972157
ENSG00000073756.13	ENST00000559627.1	16.5841	-2.04756	1.34635	-1.52082	0.128305	0.185099
ENSG00000073792.17	ENST00000496495.1	145.519	-0.930664	0.253587	-3.66999	0.000242557	0.000528345
ENSG00000073803.15	ENST00000448876.5	211.091	-0.374939	0.184645	-2.0306	0.0422958	0.0677404
ENSG00000073849.17	ENST00000470633.1	229.253	-2.92872	0.209564	-13.9753	2.20531e-44	2.72297e-43
ENSG00000073861.4	ENST00000581328.1	112.603	0.262409	1.04901	0.250148	0.802473	0.872954
ENSG00000073910.23	ENST00000490410.1	3.75711	1.77004	1.10381	1.60357	0.108808	0.160027
ENSG00000073921.19	ENST00000534375.1	93.2903	-1.98859	0.29057	-6.84375	7.7149e-12	2.89121e-11
ENSG00000073969.20	ENST00000706406.1	252.627	-2.91918	0.272065	-10.7297	7.3826e-27	5.22726e-26
ENSG00000074047.23	ENST00000418323.6	426.494	1.87197	0.19649	9.52706	1.61807e-21	9.4474e-21
ENSG00000074054.22	ENST00000491646.1	56.0286	-0.891356	0.377159	-2.36335	0.0181108	0.0309424
ENSG00000074071.16	ENST00000890486.1	628.28	-4.37851	0.251439	-17.4138	6.48378e-68	1.45713e-66
ENSG00000074181.10	ENST00000597756.1	71.2517	-0.599559	0.429441	-1.39614	0.162673	0.22799
ENSG00000074201.10	ENST00000526009.5	507.73	-0.405617	0.167743	-2.41809	0.0156023	0.0269302
ENSG00000074211.14	ENST00000507028.1	397.45	2.0344	0.216969	9.37645	6.82282e-21	3.88851e-20
ENSG00000074219.15	ENST00000595233.1	21.2134	-1.30194	0.509852	-2.55356	0.0106628	0.0189098
ENSG00000074266.24	ENST00000528250.1	41.6853	-0.0587623	0.440476	-0.133406	0.893872	0.948885
ENSG00000074276.12	ENST00000508085.1	2.65118	1.70605	3.00184	0.568335	0.569807	0.663073
ENSG00000074317.12	ENST00000862613.1	16.3675	-1.97542	0.762815	-2.58964	0.00960754	0.0171462
ENSG00000074319.14	ENST00000540555.1	74.1944	-2.19687	0.338831	-6.48365	8.95281e-11	3.16813e-10
ENSG00000074356.18	ENST00000576523.1	189.33	-1.4568	0.23716	-6.1427	8.11328e-10	2.7186e-09
ENSG00000074370.20	ENST00000574202.1	128.158	-0.0582933	0.996369	-0.0585058	0.953346	0.967157
ENSG00000074410.15	ENST00000558287.1	16.8274	-1.20628	0.565495	-2.13315	0.0329128	0.0537067
ENSG00000074416.17	ENST00000648300.1	2012.05	2.05761	0.142564	14.4329	3.21371e-47	4.3017e-46
ENSG00000074582.16	ENST00000493376.1	87.7699	-1.67743	0.360158	-4.65748	3.20102e-06	8.28473e-06
ENSG00000074590.14	ENST00000261402.7	288.393	-0.718014	0.163879	-4.38136	1.17939e-05	2.90492e-05
ENSG00000074603.20	ENST00000560665.1	197.804	0.623568	0.207925	2.999	0.00270868	0.00522125
ENSG00000074621.15	ENST00000505666.2	39.1608	-1.30872	0.408867	-3.20084	0.00137026	0.00274593
ENSG00000074657.15	ENST00000590442.1	60.989	-1.51352	0.409006	-3.70049	0.000215184	0.000471171
ENSG00000074695.7	ENST00000592562.1	87.7537	-2.38534	0.380873	-6.26282	3.78079e-10	1.29098e-09
ENSG00000074696.14	ENST00000561763.1	263.2	-2.00401	0.261933	-7.65086	1.99645e-14	8.57264e-14
ENSG00000074706.15	ENST00000470622.1	25.2967	-3.68943	1.15061	-3.2065	0.0013436	0.00269506
ENSG00000074755.16	ENST00000572699.1	196.877	0.911136	0.242959	3.75016	0.000176725	0.000390605
ENSG00000074771.4	ENST00000159060.3	4.84061	0.26279	2.28574	0.11497	0.908469	0.948885
ENSG00000074800.17	ENST00000464920.2	9583.61	-3.5973	0.135146	-26.618	4.20589e-156	3.86419e-154
ENSG00000074842.9	ENST00000908999.1	190.706	-1.14302	0.267622	-4.27104	1.94559e-05	4.70495e-05
ENSG00000074855.11	ENST00000600711.1	27.7691	0.340113	0.491572	0.691887	0.489008	0.584689
ENSG00000074935.15	ENST00000603722.1	94.3355	-1.85799	0.334517	-5.55426	2.78792e-08	8.40673e-08
ENSG00000074964.18	ENST00000482359.1	5.71585	2.16728	0.992267	2.18418	0.0289493	0.0476995
ENSG00000074966.13	ENST00000510457.1	101.08	0.943629	0.362365	2.60409	0.0092119	0.0164887
ENSG00000075035.11	ENST00000551734.1	1.72488	1.26839	2.93829	0.431675	0.665978	0.750273
ENSG00000075043.22	ENST00000482957.1	50.6372	-1.29667	0.441276	-2.93845	0.00329859	0.00629336
ENSG00000075073.16	ENST00000373307.5	2.98454	-1.1871	2.95976	-0.40108	0.688361	0.770613
ENSG00000075089.11	ENST00000550813.5	57.4895	-1.88347	0.36293	-5.18962	2.10722e-07	5.97402e-07
ENSG00000075131.11	ENST00000261881.9	414.757	-0.402431	0.146641	-2.74433	0.0060635	0.0111373
ENSG00000075142.15	ENST00000472930.6	212.294	-2.57077	0.243917	-10.5395	5.67801e-26	3.89109e-25
ENSG00000075151.24	ENST00000634778.1	182.103	1.08344	0.197777	5.47809	4.29939e-08	1.27747e-07
ENSG00000075188.10	ENST00000550459.1	33.6136	-1.98899	0.458864	-4.33459	1.46031e-05	3.56666e-05
ENSG00000075213.12	ENST00000922179.1	248.814	0.338065	0.196789	1.71791	0.0858139	0.128868
ENSG00000075218.20	ENST00000491863.1	102.768	-1.06401	0.2682	-3.96723	7.27124e-05	0.000167022
ENSG00000075223.15	ENST00000475955.1	14.1358	-1.20593	0.925792	-1.3026	0.192713	0.264766
ENSG00000075234.18	ENST00000475467.1	23.3158	-0.737166	0.495059	-1.48905	0.136475	0.195448
ENSG00000075239.16	ENST00000534773.1	127.162	-2.47646	0.309041	-8.01337	1.11607e-15	5.11831e-15
ENSG00000075240.18	ENST00000408031.1	90.2527	-1.43996	0.35353	-4.07308	4.63958e-05	0.000108543
ENSG00000075275.18	ENST00000473624.2	275.727	-0.990139	0.188306	-5.25813	1.45529e-07	4.17346e-07
ENSG00000075290.8	ENST00000343737.6	10.6323	-1.65415	0.979937	-1.68801	0.0914084	0.136531
ENSG00000075292.21	ENST00000491843.2	1196.2	1.39727	0.136837	10.2112	1.76731e-24	1.15555e-23
ENSG00000075303.14	ENST00000483810.1	4.79744	-1.82169	1.19833	-1.52019	0.128462	0.185289
ENSG00000075336.13	ENST00000927808.1	156.226	-1.32281	0.20877	-6.33622	2.35478e-10	8.13993e-10
ENSG00000075340.24	ENST00000456320.7	418.931	-0.246867	0.165982	-1.48731	0.136934	0.196014
ENSG00000075388.4	ENST00000168712.3	3.45008	0.26279	2.57166	0.102187	0.918608	0.949783
ENSG00000075391.19	ENST00000463079.1	59.7384	-1.33247	0.365669	-3.64393	0.000268503	0.000582052
ENSG00000075399.15	ENST00000565452.1	1.41155	0.255937	2.85307	0.0897059	0.928521	0.952814
ENSG00000075407.20	ENST00000685332.1	1553.37	0.623087	0.175684	3.54664	0.000390173	0.000830902
ENSG00000075413.20	ENST00000555235.1	524.989	0.808775	0.134232	6.02519	1.68906e-09	5.54294e-09
ENSG00000075415.16	ENST00000551265.5	323.502	-3.21039	0.246369	-13.0308	8.17634e-39	8.66085e-38
ENSG00000075420.14	ENST00000476794.1	245.88	1.92434	0.172909	11.1292	9.04234e-29	6.86803e-28
ENSG00000075426.13	ENST00000264716.9	233.751	-1.83482	0.205486	-8.9292	4.29114e-19	2.27097e-18
ENSG00000075429.9	ENST00000307139.4	23.2278	0.591016	1.16229	0.508491	0.611109	0.700295
ENSG00000075461.7	ENST00000921465.1	56.5589	0.749066	0.505737	1.48114	0.13857	0.19805
ENSG00000075539.16	ENST00000502925.1	77.558	-0.998708	0.302479	-3.30174	0.000960855	0.0019613
ENSG00000075568.18	ENST00000465767.1	81.6582	-1.48544	0.329554	-4.50743	6.56161e-06	1.65277e-05
ENSG00000075618.19	ENST00000473330.1	2241.56	-3.61721	0.193552	-18.6886	6.13373e-78	1.70466e-76
ENSG00000075624.18	ENST00000417101.2	6053.8	-4.61956	0.175878	-26.2657	4.72925e-152	4.04027e-150
ENSG00000075643.7	ENST00000588132.1	21.5907	-0.511311	0.962159	-0.53142	0.595128	0.685521
ENSG00000075651.18	ENST00000463281.1	12.0407	-0.897786	0.75332	-1.19177	0.23335	0.312832
ENSG00000075673.13	ENST00000911814.1	75.025	-3.54033	0.914893	-3.86966	0.000108985	0.000246279
ENSG00000075702.19	ENST00000680597.1	159.843	0.116257	0.24012	0.484163	0.62827	0.716054
ENSG00000075711.22	ENST00000434148.1	45.4729	-0.104033	0.384859	-0.270313	0.786919	0.859673
ENSG00000075785.15	ENST00000674593.1	1685.41	-1.71864	0.141398	-12.1546	5.42148e-34	4.90405e-33
ENSG00000075826.18	ENST00000492667.5	82.8045	2.18758	0.255075	8.57622	9.80433e-18	4.91528e-17
ENSG00000075856.13	ENST00000547397.1	135.045	-1.39831	0.210668	-6.63748	3.19098e-11	1.1578e-10
ENSG00000075886.11	ENST00000409047.2	0.925747	0.262789	3.64403	0.072115	0.94251	0.959883
ENSG00000075891.25	ENST00000483202.2	6.14385	1.22684	0.909047	1.34959	0.177147	0.245603
ENSG00000075914.14	ENST00000459856.1	32.2708	-0.475102	0.40098	-1.18485	0.236076	0.316031
ENSG00000075945.13	ENST00000474292.1	44.5817	0.0786262	0.359702	0.218587	0.826971	0.894178
ENSG00000075975.18	ENST00000677008.1	149.711	-2.22313	0.216301	-10.2779	8.85983e-25	5.84592e-24
ENSG00000076003.6	ENST00000943623.1	1850.54	-0.949528	0.0913039	-10.3996	2.48884e-25	1.66892e-24
ENSG00000076043.12	ENST00000544507.1	82.2311	-1.72477	0.365237	-4.72233	2.33152e-06	6.10661e-06
ENSG00000076053.13	ENST00000538134.1	45.0781	-2.42788	0.416987	-5.82245	5.79904e-09	1.83018e-08
ENSG00000076067.15	ENST00000262031.10	587.52	0.705987	0.133543	5.28657	1.24632e-07	3.59055e-07
ENSG00000076201.17	ENST00000495653.1	56.5979	-0.446223	0.345074	-1.29312	0.195969	0.26876
ENSG00000076242.19	ENST00000673741.1	61.1226	-0.627406	0.322273	-1.94682	0.0515566	0.081234
ENSG00000076248.13	ENST00000540158.1	145.192	-2.88664	0.301266	-9.58171	9.54519e-22	5.62908e-21
ENSG00000076258.11	ENST00000480136.1	32.745	-0.471858	0.541356	-0.871622	0.383414	0.480323
ENSG00000076321.12	ENST00000488983.1	28.2932	-0.573786	0.487345	-1.17737	0.239048	0.319579
ENSG00000076344.17	ENST00000477143.5	7.6047	1.84917	2.01328	0.918484	0.358366	0.453331
ENSG00000076351.14	ENST00000578217.1	91.7652	-2.27045	0.287214	-7.90509	2.67739e-15	1.20573e-14
ENSG00000076356.8	ENST00000483048.1	125.212	-1.84018	0.264319	-6.96197	3.35553e-12	1.28126e-11
ENSG00000076513.18	ENST00000553246.1	101.991	-1.7627	0.302374	-5.82955	5.55782e-09	1.75671e-08
ENSG00000076554.17	ENST00000521618.1	89.4154	-0.696835	0.313211	-2.22481	0.0260942	0.0433582
ENSG00000076641.5	ENST00000523463.1	103.672	-1.68234	0.253283	-6.64212	3.09204e-11	1.12276e-10
ENSG00000076650.8	ENST00000590062.1	26.2097	-0.582277	0.513773	-1.13334	0.257073	0.340701
ENSG00000076662.12	ENST00000589580.1	24.7836	4.02732	1.68545	2.38946	0.0168732	0.0289595
ENSG00000076685.20	ENST00000469228.1	39.7969	-1.61527	0.443065	-3.64568	0.000266684	0.000578295
ENSG00000076706.18	ENST00000524940.5	41.2024	-0.119314	0.371003	-0.321597	0.747758	0.823914
ENSG00000076716.10	ENST00000887818.1	495.337	0.0374416	0.164204	0.228019	0.819632	0.887885
ENSG00000076770.17	ENST00000538204.6	463.329	-1.37623	0.224168	-6.13927	8.29027e-10	2.77684e-09
ENSG00000076826.11	ENST00000593434.1	21.9696	-1.29789	0.581852	-2.23062	0.0257065	0.042767
ENSG00000076864.22	ENST00000464457.1	116.861	1.08309	0.385835	2.80713	0.00499847	0.00928655
ENSG00000076924.13	ENST00000600230.1	63.4784	-1.51981	0.359098	-4.2323	2.31313e-05	5.55914e-05
ENSG00000076928.21	ENST00000598444.1	25.381	1.56467	0.612074	2.55634	0.0105779	0.0187683
ENSG00000076944.18	ENST00000599278.1	17.918	-1.95264	0.767185	-2.5452	0.0109216	0.0193401
ENSG00000076984.19	ENST00000494348.1	92.7746	-1.53157	0.320851	-4.77345	1.811e-06	4.78802e-06
ENSG00000077009.15	ENST00000913549.1	4.80775	-2.7406	1.88656	-1.4527	0.146307	0.207624
ENSG00000077044.12	ENST00000465569.1	28.0695	0.392927	0.487878	0.80538	0.420601	0.517304
ENSG00000077063.11	ENST00000487820.1	5.68982	-1.54007	1.21634	-1.26615	0.20546	0.28023
ENSG00000077080.11	ENST00000487125.1	5.11169	1.70531	2.36109	0.722254	0.470139	0.56655
ENSG00000077092.21	ENST00000689700.1	242.478	0.451481	0.163408	2.76291	0.00572894	0.0105581
ENSG00000077097.18	ENST00000699045.1	199.518	-1.61091	0.248254	-6.48895	8.64378e-11	3.06195e-10
ENSG00000077147.17	ENST00000485093.1	438.55	-1.56617	0.169639	-9.23235	2.64767e-20	1.4748e-19
ENSG00000077150.22	ENST00000473400.1	51.1505	-2.28455	0.432553	-5.28154	1.281e-07	3.68791e-07
ENSG00000077152.13	ENST00000934402.1	205.425	-1.59152	0.233222	-6.82405	8.85102e-12	3.3067e-11
ENSG00000077157.24	ENST00000464965.1	13.4676	0.646971	0.630677	1.02584	0.304969	0.394088
ENSG00000077232.20	ENST00000640034.2	192.782	-1.58818	0.219525	-7.23464	4.66758e-13	1.86683e-12
ENSG00000077235.19	ENST00000567843.1	163.509	-2.07468	0.237356	-8.74079	2.31489e-18	1.18856e-17
ENSG00000077238.15	ENST00000562968.1	2.84896	-3.53796	1.82715	-1.93633	0.0528271	0.0830766
ENSG00000077254.15	ENST00000498328.1	63.7452	-1.96559	0.350638	-5.60574	2.07372e-08	6.30726e-08
ENSG00000077264.18	ENST00000484442.5	0.574839	1.25384	3.11623	0.402357	0.687422	0.769732
ENSG00000077274.10	ENST00000932651.1	8.67917	-1.17859	2.1891	-0.538389	0.590309	0.680967
ENSG00000077312.10	ENST00000596860.1	205.339	-1.84351	0.206247	-8.93834	3.95067e-19	2.09369e-18
ENSG00000077327.17	ENST00000435326.5	374.241	1.48576	1.01092	1.46972	0.141637	0.201857
ENSG00000077348.11	ENST00000688768.1	146.017	-1.16478	0.246095	-4.73304	2.21178e-06	5.80675e-06
ENSG00000077380.17	ENST00000479806.1	489.437	0.163697	0.132468	1.23575	0.216551	0.293055
ENSG00000077454.18	ENST00000470184.1	45.3199	-0.278393	0.397454	-0.700442	0.483652	0.579627
ENSG00000077458.13	ENST00000535919.1	93.7539	-1.22113	0.334797	-3.64737	0.00026494	0.000574686
ENSG00000077463.16	ENST00000915977.1	149.55	-0.198838	0.245983	-0.808339	0.418896	0.515712
ENSG00000077522.16	ENST00000492101.1	6.70896	0.725349	1.11916	0.648118	0.516909	0.612163
ENSG00000077549.20	ENST00000674299.1	456.787	-1.57447	0.157484	-9.99764	1.5607e-23	9.83948e-23
ENSG00000077585.15	ENST00000477559.2	175.854	1.71444	0.178611	9.59874	8.09238e-22	4.78782e-21
ENSG00000077616.11	ENST00000532691.1	49.282	0.561584	0.397314	1.41345	0.157523	0.22155
ENSG00000077684.17	ENST00000887606.1	501.164	-0.867255	0.142376	-6.09131	1.11994e-09	3.72284e-09
ENSG00000077713.20	ENST00000484058.1	302.765	1.44004	0.161825	8.89879	5.64587e-19	2.97386e-18
ENSG00000077721.18	ENST00000625379.1	132.648	-3.2931	0.346927	-9.49222	2.26175e-21	1.3118e-20
ENSG00000077782.24	ENST00000526688.1	291.819	-1.59163	0.198881	-8.00292	1.215e-15	5.56309e-15
ENSG00000077935.18	ENST00000923332.1	13.3698	1.5851	1.34521	1.17833	0.238666	0.319127
ENSG00000077942.20	ENST00000484531.1	40.6218	-2.19623	0.422665	-5.19614	2.03469e-07	5.77643e-07
ENSG00000077943.9	ENST00000477064.1	8.06031	1.14149	0.910103	1.25424	0.209755	0.285295
ENSG00000078018.23	ENST00000473543.1	1.50186	-2.56148	2.4634	-1.03981	0.298427	0.386839
ENSG00000078043.17	ENST00000591865.1	18.8115	-0.0836644	0.557529	-0.150063	0.880715	0.939917
ENSG00000078053.18	ENST00000460887.1	6.94841	-1.7941	0.98587	-1.81981	0.0687879	0.105627
ENSG00000078061.15	ENST00000470206.1	209.684	-1.23124	0.252341	-4.87929	1.06466e-06	2.86805e-06
ENSG00000078070.15	ENST00000473955.1	16.7648	-0.713601	0.568279	-1.25572	0.209216	0.284656
ENSG00000078081.9	ENST00000470251.1	7.86264	-1.50902	0.966434	-1.56143	0.118421	0.172499
ENSG00000078114.20	ENST00000485750.1	17.1494	1.19585	0.584483	2.04599	0.0407571	0.0654427
ENSG00000078124.14	ENST00000680624.1	171.101	-2.04365	0.239798	-8.52238	1.56313e-17	7.77247e-17
ENSG00000078140.15	ENST00000510719.1	2759.42	2.74923	0.0796478	34.5174	4.39911e-261	1.74335e-258
ENSG00000078142.15	ENST00000590220.1	27.6718	-1.33525	0.482586	-2.76686	0.00565996	0.0104371
ENSG00000078177.16	ENST00000515550.1	394.025	2.27067	0.147456	15.3989	1.66435e-53	2.65163e-52
ENSG00000078269.15	ENST00000640569.1	23.024	-0.838018	0.558306	-1.501	0.133355	0.191445
ENSG00000078295.18	ENST00000484965.5	61.7164	3.43189	1.12183	3.05919	0.00221935	0.00433167
ENSG00000078304.21	ENST00000556570.5	176.821	0.0198342	0.180389	0.109953	0.912447	0.948885
ENSG00000078328.23	ENST00000585867.2	646.277	3.4726	0.77484	4.4817	7.40523e-06	1.85691e-05
ENSG00000078369.20	ENST00000703698.1	1122.88	-2.79992	0.129564	-21.6104	1.43286e-103	6.30511e-102
ENSG00000078401.8	ENST00000877370.1	5.55648	-3.74818	1.92143	-1.95072	0.0510901	0.0805565
ENSG00000078403.18	ENST00000420525.1	567.022	2.40031	0.147603	16.262	1.83751e-59	3.3864e-58
ENSG00000078487.19	ENST00000479315.1	3.15903	-2.31765	2.02991	-1.14175	0.253557	0.336592
ENSG00000078549.17	ENST00000705424.1	133.658	-0.968095	0.211562	-4.57593	4.74108e-06	1.20993e-05
ENSG00000078579.9	ENST00000180166.6	47.2371	-2.76234	1.72189	-1.60425	0.10866	0.15983
ENSG00000078589.14	ENST00000544091.1	9.98967	0.262788	4.63274	0.0567242	0.954765	0.968155
ENSG00000078618.24	ENST00000464385.1	168.072	-1.74029	0.283055	-6.14826	7.83396e-10	2.62756e-09
ENSG00000078668.15	ENST00000885479.1	642.247	-1.80732	0.110639	-16.3353	5.53368e-60	1.03432e-58
ENSG00000078674.21	ENST00000518985.1	116.432	-0.0120073	0.258911	-0.0463761	0.963011	0.972157
ENSG00000078687.19	ENST00000592251.1	59.4917	-0.866475	0.317701	-2.72733	0.00638495	0.0116942
ENSG00000078699.22	ENST00000543126.1	113.67	-0.533114	0.231345	-2.30441	0.0211997	0.0357949
ENSG00000078725.14	ENST00000373964.2	205.15	-1.24623	0.378591	-3.29177	0.000995592	0.00202867
ENSG00000078747.18	ENST00000696976.1	555.283	1.53323	0.115234	13.3053	2.15628e-40	2.39461e-39
ENSG00000078804.14	ENST00000962433.1	124.837	-2.43347	0.334587	-7.27304	3.51493e-13	1.41511e-12
ENSG00000078808.21	ENST00000478938.1	203.508	-2.2535	0.253773	-8.87996	6.6883e-19	3.51172e-18
ENSG00000078814.20	ENST00000456649.1	5.18265	3.2897	2.01063	1.63615	0.101808	0.150675
ENSG00000078898.8	ENST00000170150.4	156.753	0.26279	2.05157	0.128093	0.898076	0.948885
ENSG00000078900.17	ENST00000604566.1	63.4049	-1.79013	0.326493	-5.48292	4.18367e-08	1.24424e-07
ENSG00000078902.17	ENST00000528719.1	34.5735	-0.832384	0.460632	-1.80705	0.0707548	0.108366
ENSG00000078967.14	ENST00000491770.1	32.4511	-1.47321	0.493788	-2.98348	0.0028499	0.00548068
ENSG00000079101.18	ENST00000584046.1	1.61931	-2.76957	2.43135	-1.13911	0.254659	0.337912
ENSG00000079102.19	ENST00000518449.5	316.801	2.14954	0.141742	15.1652	6.0156e-52	9.19064e-51
ENSG00000079112.11	ENST00000450165.6	49.7065	-1.18046	2.10017	-0.562076	0.574064	0.666789
ENSG00000079134.14	ENST00000577429.5	33.6321	-1.14946	0.53619	-2.14375	0.0320531	0.0523919
ENSG00000079150.19	ENST00000424785.7	97.7338	-1.38678	0.294679	-4.70607	2.5254e-06	6.59453e-06
ENSG00000079156.18	ENST00000477646.1	418.324	1.81985	0.132293	13.7562	4.67733e-43	5.5832e-42
ENSG00000079215.16	ENST00000679384.1	42.0128	-1.72394	0.440636	-3.9124	9.13838e-05	0.000208027
ENSG00000079246.17	ENST00000493706.1	365.942	-2.67982	0.21538	-12.4423	1.54082e-35	1.46002e-34
ENSG00000079257.8	ENST00000264265.4	88.3422	-2.00329	0.33507	-5.97872	2.24895e-09	7.31617e-09
ENSG00000079308.21	ENST00000495556.1	2.44718	-0.742746	1.67918	-0.442326	0.658254	0.743158
ENSG00000079313.16	ENST00000587404.1	65.621	-0.943417	0.365331	-2.58236	0.00981273	0.0174852
ENSG00000079332.17	ENST00000477464.1	178.75	-2.54228	0.253957	-10.0106	1.36856e-23	8.64495e-23
ENSG00000079335.22	ENST00000455467.6	433.348	1.38926	0.130804	10.6209	2.38223e-26	1.65999e-25
ENSG00000079337.17	ENST00000476259.1	0.888644	1.25028	3.66809	0.340853	0.733214	0.811234
ENSG00000079387.16	ENST00000551358.1	47.24	-0.637062	0.419073	-1.52017	0.128469	0.185297
ENSG00000079432.10	ENST00000571033.1	175.225	-0.748346	0.280325	-2.66956	0.00759501	0.0137597
ENSG00000079459.15	ENST00000529521.1	549.66	-3.68327	0.18925	-19.4625	2.28323e-84	7.14703e-83
ENSG00000079462.9	ENST00000597333.1	104.83	-2.87122	0.331895	-8.65099	5.10559e-18	2.58833e-17
ENSG00000079482.15	ENST00000681349.1	8.8686	1.08236	0.743228	1.45629	0.145312	0.206376
ENSG00000079557.6	ENST00000853615.1	30.0188	1.70545	2.0839	0.818393	0.413133	0.510283
ENSG00000079616.15	ENST00000689221.1	113.192	-1.71413	0.30376	-5.64303	1.67081e-08	5.11615e-08
ENSG00000079689.16	ENST00000968674.1	1.34154	0.26279	3.09632	0.0848717	0.932363	0.954389
ENSG00000079691.20	ENST00000461945.1	364.363	2.25664	0.172629	13.0722	4.7444e-39	5.06049e-38
ENSG00000079739.18	ENST00000483707.1	30.5259	-2.48014	0.51702	-4.797	1.61061e-06	4.27775e-06
ENSG00000079785.17	ENST00000459706.2	876.952	-0.729467	0.123478	-5.90768	3.46959e-09	1.11256e-08
ENSG00000079805.20	ENST00000586130.1	86.9846	-1.66546	0.31939	-5.2145	1.84313e-07	5.2511e-07
ENSG00000079819.21	ENST00000527423.5	391.016	0.264391	0.167011	1.58307	0.113405	0.166053
ENSG00000079841.20	ENST00000370419.6	123.832	2.23512	0.277832	8.04486	8.63418e-16	3.98132e-15
ENSG00000079931.16	ENST00000392401.3	191.322	-0.765397	0.246902	-3.10001	0.00193516	0.00380542
ENSG00000079950.15	ENST00000942368.1	1866.3	-0.720102	0.10927	-6.59012	4.39478e-11	1.58353e-10
ENSG00000079999.15	ENST00000591039.1	74.4893	-1.53964	0.313997	-4.90335	9.42176e-07	2.54714e-06
ENSG00000080007.9	ENST00000464221.1	9.72927	-2.17502	1.94364	-1.11905	0.263121	0.347613
ENSG00000080031.11	ENST00000586310.1	15.5602	0.26279	2.13724	0.122958	0.90214	0.948885
ENSG00000080166.16	ENST00000490854.1	1.90797	2.58425	1.66077	1.55606	0.119694	0.17416
ENSG00000080189.16	ENST00000424568.1	165.759	-0.468	0.202418	-2.31205	0.0207751	0.0351283
ENSG00000080200.10	ENST00000485253.1	184.039	-0.39328	0.206206	-1.90722	0.0564924	0.088263
ENSG00000080224.18	ENST00000470610.6	4188.4	3.03619	0.135761	22.3643	8.77229e-111	4.27145e-109
ENSG00000080293.11	ENST00000630739.2	1.35862	0.262786	6.12072	0.0429338	0.965754	0.972157
ENSG00000080298.17	ENST00000449190.5	2059.26	2.15036	0.150045	14.3315	1.39157e-46	1.82544e-45
ENSG00000080345.19	ENST00000444746.7	3391.49	0.076885	0.161009	0.477519	0.632993	0.720365
ENSG00000080371.7	ENST00000547246.1	65.1333	-0.00237228	0.3137	-0.00756227	0.993966	0.995382
ENSG00000080493.20	ENST00000638464.1	242.445	1.90853	0.193261	9.87541	5.3214e-23	3.29293e-22
ENSG00000080503.26	ENST00000635226.1	10.2266	-0.364239	0.716544	-0.508328	0.611223	0.700416
ENSG00000080511.5	ENST00000587782.1	0.79298	0.262789	3.96168	0.0663327	0.947113	0.962871
ENSG00000080546.15	ENST00000523632.1	63.6001	-1.53105	0.294998	-5.19004	2.10248e-07	5.9611e-07
ENSG00000080561.15	ENST00000474517.1	23.1238	-0.624075	0.508753	-1.22668	0.219944	0.297054
ENSG00000080572.15	ENST00000970294.1	5.4017	-1.31127	2.11647	-0.619556	0.53555	0.630199
ENSG00000080573.7	ENST00000461214.1	9.48634	0.26279	2.26815	0.115861	0.907763	0.948885
ENSG00000080603.18	ENST00000483083.3	9218.65	-0.454516	0.108369	-4.19416	2.73886e-05	6.54116e-05
ENSG00000080608.11	ENST00000469168.1	67.0736	-0.826856	0.358781	-2.30463	0.0211874	0.0357756
ENSG00000080644.17	ENST00000559080.1	1.50703	-0.747618	2.34287	-0.319104	0.749648	0.82565
ENSG00000080709.17	ENST00000505491.1	198.196	1.26258	1.26385	0.998992	0.317799	0.408363
ENSG00000080802.22	ENST00000414802.5	1030.94	0.559667	0.193349	2.89459	0.00379654	0.00717928
ENSG00000080815.21	ENST00000697915.1	451.517	-2.06576	0.167567	-12.328	6.39995e-35	5.95013e-34
ENSG00000080819.10	ENST00000515041.1	85.5639	-2.86655	0.321267	-8.92263	4.55325e-19	2.4078e-18
ENSG00000080822.18	ENST00000513873.1	370.363	-3.45862	0.244373	-14.153	1.78873e-45	2.28007e-44
ENSG00000080823.24	ENST00000521249.1	47.9689	-0.150948	0.375433	-0.402063	0.687638	0.769933
ENSG00000080824.20	ENST00000556554.1	2605.67	-3.79089	0.151271	-25.0603	1.34754e-138	9.86187e-137
ENSG00000080839.13	ENST00000527999.1	243.659	1.42859	0.167801	8.51361	1.68602e-17	8.37435e-17
ENSG00000080845.20	ENST00000479951.1	121.964	-0.176554	0.284188	-0.621256	0.534431	0.629123
ENSG00000080854.16	ENST00000564347.1	25.9585	1.37973	0.453636	3.04148	0.00235416	0.00457971
ENSG00000080986.14	ENST00000574567.1	12.5109	0.0789421	0.752023	0.104973	0.916397	0.949452
ENSG00000081014.12	ENST00000561397.1	92.8046	-0.61389	0.325655	-1.88509	0.0594175	0.0924368
ENSG00000081019.15	ENST00000369581.2	52.0373	-1.32655	0.355924	-3.72708	0.000193714	0.000426359
ENSG00000081026.20	ENST00000477955.1	329.265	2.10375	0.224863	9.3557	8.30455e-21	4.71562e-20
ENSG00000081041.10	ENST00000510048.1	0.991548	-4.18466	2.9437	-1.42157	0.155152	0.21863
ENSG00000081051.8	ENST00000506820.1	5.20242	1.70533	2.30195	0.74082	0.458802	0.555244
ENSG00000081052.14	ENST00000682098.1	7.56968	0.261604	0.999868	0.261639	0.7936	0.8649
ENSG00000081059.21	ENST00000519238.1	133.458	-1.65438	0.259342	-6.37913	1.78097e-10	6.19604e-10
ENSG00000081087.16	ENST00000477774.2	185.741	-0.886473	0.246742	-3.59271	0.00032726	0.000702851
ENSG00000081138.14	ENST00000581601.1	27.3533	1.13211	0.457343	2.4754	0.0133085	0.0232248
ENSG00000081148.12	ENST00000193391.8	81.5952	1.06736	0.339833	3.14085	0.0016846	0.00333663
ENSG00000081154.12	ENST00000460231.5	1364.37	-0.58698	0.184181	-3.18697	0.00143774	0.00287326
ENSG00000081177.20	ENST00000465286.1	17.9506	-2.96899	0.706046	-4.20509	2.60974e-05	6.24399e-05
ENSG00000081181.9	ENST00000557319.1	78.9069	-2.9797	0.442946	-6.72701	1.73185e-11	6.36454e-11
ENSG00000081189.18	ENST00000636061.1	12.1218	-1.8316	0.898667	-2.03813	0.0415366	0.0666097
ENSG00000081237.23	ENST00000484135.1	2.96535	0.26279	2.80049	0.093837	0.925239	0.951559
ENSG00000081248.13	ENST00000680051.1	6.21934	1.70565	2.27676	0.749158	0.453762	0.55047
ENSG00000081277.13	ENST00000475988.1	4.49801	0.26279	2.52215	0.104193	0.917016	0.949617
ENSG00000081307.16	ENST00000494112.1	77.9279	-2.16252	0.413982	-5.22371	1.75375e-07	5.00233e-07
ENSG00000081320.13	ENST00000714419.1	832.821	-0.755723	0.12452	-6.0691	1.2863e-09	4.25693e-09
ENSG00000081377.18	ENST00000463547.5	575.288	2.55571	0.120679	21.1777	1.53324e-99	6.31253e-98
ENSG00000081386.14	ENST00000472201.1	24.7386	-1.34866	0.633371	-2.12933	0.0332267	0.0541815
ENSG00000081479.15	ENST00000493501.1	31.4206	0.0494601	0.532121	0.092949	0.925944	0.951802
ENSG00000081665.15	ENST00000587822.1	36.4982	0.378986	0.441861	0.857705	0.391056	0.488407
ENSG00000081692.14	ENST00000465251.1	56.2361	-1.82825	0.419932	-4.35367	1.33879e-05	3.28264e-05
ENSG00000081721.13	ENST00000490591.1	69.1249	-1.85125	0.36293	-5.10085	3.38134e-07	9.44013e-07
ENSG00000081760.18	ENST00000398953.2	10.6992	0.963112	0.644502	1.49435	0.135084	0.193673
ENSG00000081791.10	ENST00000508751.1	237.831	-0.577556	0.222335	-2.59769	0.00938543	0.0167811
ENSG00000081800.10	ENST00000539873.1	70.157	4.51265	1.58067	2.8549	0.00430506	0.00807224
ENSG00000081803.18	ENST00000951093.1	1513.18	1.75409	0.133117	13.1771	1.18859e-39	1.29029e-38
ENSG00000081818.4	ENST00000623478.1	10.0678	-1.18131	2.19017	-0.539367	0.589633	0.68039
ENSG00000081870.13	ENST00000371376.1	229.756	-0.303024	0.190721	-1.58884	0.112097	0.16434
ENSG00000081913.15	ENST00000588953.1	50.418	-0.749792	0.35961	-2.08502	0.0370677	0.0599435
ENSG00000081923.16	ENST00000588255.1	1.4388	-0.0431375	2.04008	-0.0211451	0.98313	0.986653
ENSG00000081985.15	ENST00000441640.4	7.29559	-2.06438	1.76561	-1.16922	0.242315	0.323426
ENSG00000082014.17	ENST00000472789.1	36.6896	-1.13785	0.647337	-1.75775	0.0787906	0.119328
ENSG00000082068.10	ENST00000505799.1	39.9975	-0.0854104	0.352207	-0.242501	0.808392	0.878093
ENSG00000082126.19	ENST00000602867.1	46.2766	1.46539	0.640727	2.28707	0.022192	0.0373478
ENSG00000082146.14	ENST00000415688.1	131.89	-2.56806	0.370335	-6.93443	4.07872e-12	1.55134e-11
ENSG00000082153.19	ENST00000463310.1	376.051	-3.88061	0.215779	-17.9842	2.5931e-72	6.38645e-71
ENSG00000082175.16	ENST00000325455.10	193.317	-0.24823	0.226051	-1.09811	0.272155	0.357553
ENSG00000082196.22	ENST00000508434.1	23.4951	2.29816	0.535109	4.29475	1.7489e-05	4.2443e-05
ENSG00000082212.14	ENST00000591925.2	201.554	-1.80716	0.250231	-7.22195	5.12476e-13	2.04541e-12
ENSG00000082213.19	ENST00000504866.1	276.667	-1.09768	0.206811	-5.30765	1.11046e-07	3.21131e-07
ENSG00000082258.14	ENST00000452521.1	481.244	-0.287615	0.196583	-1.46307	0.143448	0.204083
ENSG00000082269.18	ENST00000505675.1	64.0843	-0.231415	0.349542	-0.662054	0.507937	0.603204
ENSG00000082293.13	ENST00000478620.2	8.65779	-0.33878	0.693145	-0.488758	0.625013	0.712985
ENSG00000082397.19	ENST00000579951.2	119.895	-2.24111	0.342278	-6.54762	5.8461e-11	2.09114e-10
ENSG00000082438.19	ENST00000474975.1	16.1128	-0.930659	0.635718	-1.46395	0.143207	0.203798
ENSG00000082458.13	ENST00000496931.1	37.5714	-1.43834	0.413301	-3.48013	0.000501173	0.00105588
ENSG00000082482.15	ENST00000444842.7	119.8	-0.00960061	0.248193	-0.0386821	0.969144	0.974884
ENSG00000082497.13	ENST00000946959.1	234.797	-2.55136	0.227946	-11.1929	4.4194e-29	3.39635e-28
ENSG00000082512.16	ENST00000473385.1	123.642	-0.0255144	0.231195	-0.110359	0.912125	0.948885
ENSG00000082515.19	ENST00000518364.1	164.003	-0.74445	0.250348	-2.97366	0.00294269	0.00564886
ENSG00000082516.9	ENST00000522075.1	104.069	-2.90503	0.28438	-10.2153	1.69298e-24	1.10761e-23
ENSG00000082556.14	ENST00000524278.5	1.22005	0.262788	4.36507	0.0602026	0.951994	0.966247
ENSG00000082641.17	ENST00000581319.1	338.562	-2.75496	0.183558	-15.0086	6.44624e-51	9.57912e-50
ENSG00000082684.17	ENST00000451541.5	3.15655	3.70441	2.20586	1.67935	0.0930836	0.138823
ENSG00000082701.18	ENST00000677423.1	211.52	-0.642199	0.214123	-2.9992	0.00270688	0.00521809
ENSG00000082781.13	ENST00000460797.5	57.1305	-1.22002	0.329752	-3.6998	0.000215769	0.000472386
ENSG00000082805.22	ENST00000543263.2	1779.43	2.63886	0.113134	23.325	2.47504e-120	1.40819e-118
ENSG00000082898.20	ENST00000492182.6	673.985	-0.731795	0.189507	-3.86158	0.000112655	0.000254213
ENSG00000082996.21	ENST00000493238.1	60.3887	-1.88636	0.419987	-4.49147	7.07342e-06	1.77666e-05
ENSG00000083067.27	ENST00000354500.6	1649.74	5.54097	0.663872	8.34644	7.03526e-17	3.40299e-16
ENSG00000083093.13	ENST00000697384.1	222.345	-0.752219	0.232983	-3.22865	0.00124377	0.00250493
ENSG00000083097.15	ENST00000481979.1	24.8236	-0.106203	0.516058	-0.205797	0.836949	0.902666
ENSG00000083099.12	ENST00000517396.5	419.491	-2.39484	0.191781	-12.4873	8.75232e-36	8.34992e-35
ENSG00000083123.16	ENST00000491328.1	87.8576	-0.735553	0.290826	-2.52919	0.0114327	0.0201856
ENSG00000083168.12	ENST00000463961.1	120.62	-1.11555	0.262783	-4.24512	2.18476e-05	5.25978e-05
ENSG00000083223.19	ENST00000469004.1	22.3922	-1.32185	0.619789	-2.13275	0.0329453	0.0537578
ENSG00000083290.21	ENST00000571454.2	41.9053	0.0812379	0.371634	0.218596	0.826964	0.894174
ENSG00000083307.13	ENST00000474338.1	0.957943	0.262789	3.7506	0.0700659	0.944141	0.960897
ENSG00000083312.20	ENST00000680111.1	1901.86	-1.19603	0.167504	-7.14031	9.31191e-13	3.67096e-12
ENSG00000083444.18	ENST00000470133.1	79.379	-1.02983	0.308762	-3.33535	0.000851922	0.00174899
ENSG00000083454.24	ENST00000549063.1	55.6544	-0.46002	0.473161	-0.972225	0.330938	0.423012
ENSG00000083520.16	ENST00000475871.1	371.608	-2.51239	0.229008	-10.9707	5.28364e-28	3.90195e-27
ENSG00000083535.17	ENST00000489797.1	307.423	0.330603	0.17619	1.8764	0.060601	0.0940894
ENSG00000083544.17	ENST00000484389.6	587.984	1.11823	0.150992	7.40583	1.30328e-13	5.3731e-13
ENSG00000083635.8	ENST00000379161.5	315.442	-0.029577	0.15884	-0.186206	0.852283	0.916308
ENSG00000083642.20	ENST00000474274.1	45.4009	-1.39872	0.631281	-2.21568	0.0267133	0.0443011
ENSG00000083720.14	ENST00000503374.1	15.436	-0.0112107	0.518506	-0.0216211	0.98275	0.986326
ENSG00000083750.14	ENST00000498762.1	69.6998	0.913834	0.342961	2.66454	0.00770926	0.013953
ENSG00000083782.8	ENST00000551767.1	26.3413	1.70545	2.09034	0.815872	0.414573	0.511728
ENSG00000083799.19	ENST00000563976.1	49.4694	-1.44659	0.416761	-3.47102	0.000518477	0.0010903
ENSG00000083812.14	ENST00000593925.1	301.63	-1.1958	0.223041	-5.36135	8.26044e-08	2.40779e-07
ENSG00000083814.14	ENST00000599961.1	2.01839	0.262786	6.12072	0.0429338	0.965754	0.972157
ENSG00000083817.10	ENST00000896581.1	47.6001	-2.19354	0.368396	-5.95428	2.61212e-09	8.45121e-09
ENSG00000083828.16	ENST00000396154.7	216.896	0.697547	0.191447	3.64355	0.000268903	0.000582882
ENSG00000083844.11	ENST00000600531.5	54.3627	-0.941148	0.306112	-3.07452	0.00210843	0.00412794
ENSG00000083845.10	ENST00000599232.1	2419.52	-5.47373	0.196288	-27.8862	3.92743e-171	4.52425e-169
ENSG00000083857.16	ENST00000507662.1	81.336	-2.09975	0.318397	-6.59475	4.25972e-11	1.53622e-10
ENSG00000083896.14	ENST00000505251.1	79.8961	-1.72192	0.406942	-4.23137	2.32268e-05	5.58124e-05
ENSG00000083937.10	ENST00000466696.1	53.1662	-3.83781	0.509849	-7.52734	5.17851e-14	2.17423e-13
ENSG00000084070.13	ENST00000487871.1	31.6309	-0.304789	0.410921	-0.741722	0.458256	0.5547
ENSG00000084072.18	ENST00000474804.5	254.434	-1.36749	0.191114	-7.15536	8.34508e-13	3.2977e-12
ENSG00000084073.11	ENST00000474142.1	81.0813	-2.02481	0.315714	-6.41343	1.42286e-10	4.97534e-10
ENSG00000084090.15	ENST00000479456.1	1536.55	-3.66945	0.141484	-25.9354	2.65645e-148	2.16718e-146
ENSG00000084092.8	ENST00000904433.1	361.351	-1.37058	0.154576	-8.86673	7.53257e-19	3.94844e-18
ENSG00000084093.20	ENST00000675341.1	825.055	-0.670569	0.147779	-4.53763	5.68902e-06	1.44212e-05
ENSG00000084110.12	ENST00000546579.1	14.3091	1.45304	0.70106	2.07264	0.0382062	0.0616476
ENSG00000084112.16	ENST00000546433.5	364.958	-0.687017	0.167699	-4.09674	4.1901e-05	9.84014e-05
ENSG00000084207.19	ENST00000498765.5	778.427	-4.40426	0.241065	-18.27	1.43385e-74	3.70431e-73
ENSG00000084234.19	ENST00000525604.1	1748.79	-3.60214	0.11335	-31.7789	1.26879e-221	2.54915e-219
ENSG00000084444.15	ENST00000540455.1	24.4728	-1.47841	0.587516	-2.51637	0.0118569	0.0208665
ENSG00000084453.18	ENST00000422327.5	14.0445	1.53171	0.697028	2.19749	0.0279856	0.0462281
ENSG00000084623.13	ENST00000483517.5	1532.89	-2.11969	0.105905	-20.0151	4.06733e-89	1.37404e-87
ENSG00000084628.11	ENST00000528449.1	58.9508	-2.91143	0.461719	-6.30563	2.87021e-10	9.87201e-10
ENSG00000084636.19	ENST00000529928.1	44.5638	1.70551	2.07263	0.822871	0.410581	0.507966
ENSG00000084652.17	ENST00000867271.1	1622.93	-0.940443	0.11559	-8.136	4.08555e-16	1.91043e-15
ENSG00000084674.15	ENST00000233242.5	1.66373	0.26279	3.05082	0.0861373	0.931357	0.953831
ENSG00000084676.17	ENST00000493773.1	17.8281	-1.52071	0.53626	-2.83577	0.00457154	0.00854034
ENSG00000084710.15	ENST00000858650.1	251.54	0.353381	0.170729	2.06984	0.0384676	0.0620356
ENSG00000084731.16	ENST00000852054.1	275.263	-0.183657	0.17845	-1.02918	0.303394	0.392323
ENSG00000084733.12	ENST00000473035.1	1003.92	0.0277742	0.13997	0.198429	0.842709	0.907752
ENSG00000084734.10	ENST00000478147.1	2.71236	0.26279	2.87913	0.0912742	0.927275	0.95227
ENSG00000084754.13	ENST00000461025.1	156.38	-2.24341	0.254707	-8.80781	1.27617e-18	6.61657e-18
ENSG00000084764.13	ENST00000879847.1	105.161	-0.484448	0.372889	-1.29917	0.193884	0.266215
ENSG00000085063.19	ENST00000651485.1	301.198	-2.81902	0.175749	-16.04	6.71073e-58	1.19519e-56
ENSG00000085117.14	ENST00000524750.1	3.49064	-2.32201	1.90894	-1.21638	0.223839	0.301635
ENSG00000085185.16	ENST00000441294.1	417.157	-0.837631	0.16112	-5.19879	2.00587e-07	5.69917e-07
ENSG00000085224.23	ENST00000479487.1	51.8825	0.918087	0.436811	2.1018	0.0355711	0.0576775
ENSG00000085265.13	ENST00000867921.1	67.9983	-2.17977	1.79605	-1.21365	0.224882	0.302804
ENSG00000085274.17	ENST00000941310.1	248.313	-0.686839	0.178036	-3.85787	0.000114381	0.000257924
ENSG00000085276.19	ENST00000486748.2	2164.72	3.61989	0.108916	33.2355	3.30981e-242	9.61045e-240
ENSG00000085365.19	ENST00000506858.2	212.07	-0.0185693	0.222723	-0.0833738	0.933554	0.954915
ENSG00000085377.16	ENST00000448705.1	79.0766	-1.23688	0.317801	-3.89201	9.94182e-05	0.000225484
ENSG00000085382.13	ENST00000369127.8	564.239	1.63954	0.184989	8.86292	7.79432e-19	4.08287e-18
ENSG00000085415.17	ENST00000590843.1	301.841	-1.7677	0.1795	-9.84791	6.99822e-23	4.31091e-22
ENSG00000085433.18	ENST00000934296.1	821.753	0.69355	0.12201	5.68436	1.31301e-08	4.04887e-08
ENSG00000085449.16	ENST00000462702.1	430.008	-1.71736	0.179856	-9.54854	1.31533e-21	7.71173e-21
ENSG00000085465.14	ENST00000494622.1	31.5655	0.811045	0.667285	1.21544	0.224198	0.302066
ENSG00000085491.18	ENST00000569674.1	53.4002	-1.92652	0.376787	-5.11301	3.17058e-07	8.87079e-07
ENSG00000085511.21	ENST00000539610.1	40.3042	0.417336	0.399211	1.0454	0.295837	0.38395
ENSG00000085552.19	ENST00000493195.5	39.8167	-0.179795	0.445397	-0.403674	0.686453	0.768848
ENSG00000085563.16	ENST00000491360.1	55.3715	-2.63632	0.415473	-6.34533	2.21951e-10	7.68484e-10
ENSG00000085644.15	ENST00000574928.5	206.287	-2.30063	0.239259	-9.61567	6.86596e-22	4.07422e-21
ENSG00000085662.15	ENST00000498373.1	218.417	-3.47815	0.289894	-11.998	3.63866e-33	3.1884e-32
ENSG00000085719.14	ENST00000523588.1	57.1199	-3.3359	0.462548	-7.21201	5.51319e-13	2.19703e-12
ENSG00000085721.14	ENST00000874882.1	745.809	-0.0772823	0.102179	-0.756341	0.449445	0.546075
ENSG00000085733.17	ENST00000529736.5	550.284	-1.21824	0.175763	-6.93113	4.17484e-12	1.58725e-11
ENSG00000085741.15	ENST00000961028.1	295.621	-0.425554	0.194152	-2.19186	0.0283896	0.0468464
ENSG00000085760.16	ENST00000441307.5	132.233	-0.771864	0.251698	-3.06663	0.00216485	0.0042313
ENSG00000085788.15	ENST00000528148.1	34.4598	-2.13095	0.544694	-3.9122	9.14598e-05	0.000208194
ENSG00000085831.17	ENST00000524442.1	10.7685	-0.171825	0.720325	-0.238538	0.811464	0.880667
ENSG00000085832.19	ENST00000464478.5	100.25	1.13225	0.2239	5.05696	4.26001e-07	1.18075e-06
ENSG00000085840.14	ENST00000959732.1	601.945	-0.104954	0.136095	-0.771181	0.440599	0.537091
ENSG00000085871.10	ENST00000502587.1	163.57	-0.811388	0.232858	-3.48448	0.000493095	0.00103963
ENSG00000085872.16	ENST00000597261.1	183.799	-2.06475	0.247516	-8.3419	7.31078e-17	3.53404e-16
ENSG00000085978.23	ENST00000492298.5	108.539	0.446146	0.298805	1.4931	0.135412	0.194095
ENSG00000085982.17	ENST00000454354.1	40.6895	0.228995	0.385432	0.594125	0.552429	0.646722
ENSG00000085998.16	ENST00000475642.1	77.3757	-1.63709	0.404472	-4.04749	5.17703e-05	0.000120528
ENSG00000085999.14	ENST00000661174.1	237.958	-0.152601	0.207297	-0.736149	0.46164	0.558068
ENSG00000086015.24	ENST00000492813.1	39.6937	-1.89292	0.493387	-3.83659	0.000124754	0.000280314
ENSG00000086061.17	ENST00000465677.1	257.927	-2.23393	0.209228	-10.677	1.30456e-26	9.17359e-26
ENSG00000086062.15	ENST00000718311.1	766.713	-0.503114	0.12918	-3.89467	9.83314e-05	0.000223133
ENSG00000086065.15	ENST00000948351.1	301.753	-1.30202	0.157416	-8.27124	1.32575e-16	6.33813e-16
ENSG00000086102.20	ENST00000463421.1	48.6572	-0.258471	0.364348	-0.709406	0.478073	0.574088
ENSG00000086189.12	ENST00000514605.2	210.704	-1.66135	0.287617	-5.77625	7.63822e-09	2.39176e-08
ENSG00000086200.18	ENST00000413749.2	204.142	2.15576	0.227329	9.48302	2.47031e-21	1.43104e-20
ENSG00000086232.14	ENST00000422786.1	911.82	-2.48548	0.191098	-13.0063	1.12665e-38	1.1879e-37
ENSG00000086288.12	ENST00000426106.1	2.63198	4.29086	2.31947	1.84994	0.0643229	0.0993326
ENSG00000086289.13	ENST00000199448.9	80.4474	-0.436302	0.234071	-1.86398	0.0623249	0.0965379
ENSG00000086300.18	ENST00000462993.1	25.7612	-2.15443	0.661275	-3.25799	0.00112205	0.00227111
ENSG00000086475.16	ENST00000494329.1	224.357	-1.21216	0.196898	-6.15626	7.44843e-10	2.50144e-09
ENSG00000086506.3	ENST00000199708.3	9.79501	-5.70008	1.68542	-3.382	0.000719599	0.00148956
ENSG00000086544.4	ENST00000699490.1	114.021	-0.379379	0.258819	-1.46581	0.142701	0.203179
ENSG00000086570.13	ENST00000520200.5	0.903495	3.70617	3.5449	1.0455	0.295794	0.3839
ENSG00000086589.13	ENST00000520132.1	548.58	-2.46982	0.16726	-14.7663	2.41599e-49	3.42972e-48
ENSG00000086598.12	ENST00000544188.1	626.559	-3.48166	0.182464	-19.0813	3.61054e-81	1.06384e-79
ENSG00000086619.15	ENST00000691874.1	289.095	0.256411	0.202011	1.26929	0.204336	0.278848
ENSG00000086666.21	ENST00000561017.1	87.4926	-0.535044	0.295427	-1.81109	0.0701277	0.107495
ENSG00000086696.12	ENST00000566213.1	10.4197	1.70537	2.21047	0.771498	0.440412	0.536896
ENSG00000086712.14	ENST00000485153.1	1335.89	-1.77612	0.158931	-11.1754	5.3813e-29	4.12333e-28
ENSG00000086717.20	ENST00000496075.2	22.3907	0.185148	0.829539	0.223194	0.823385	0.891085
ENSG00000086730.18	ENST00000361082.7	127.223	4.26277	1.505	2.8324	0.00461993	0.00862408
ENSG00000086758.18	ENST00000474971.1	432.116	-1.59467	0.190738	-8.36051	6.24451e-17	3.02797e-16
ENSG00000086827.10	ENST00000535142.5	383.389	-0.456917	0.156987	-2.91054	0.00360804	0.00684242
ENSG00000086848.16	ENST00000527294.5	85.9983	-0.678584	0.287411	-2.36102	0.0182245	0.0311209
ENSG00000086967.11	ENST00000597498.1	3.98766	0.26279	2.59302	0.101345	0.919277	0.949864
ENSG00000086991.14	ENST00000393282.2	0.729737	1.07927	3.08418	0.349938	0.726386	0.805148
ENSG00000087008.17	ENST00000508302.1	66.5695	0.443948	0.278705	1.59289	0.111184	0.163129
ENSG00000087053.20	ENST00000675438.1	650.872	-1.76389	0.148247	-11.8983	1.20759e-32	1.04334e-31
ENSG00000087074.10	ENST00000704027.1	837.064	-2.19345	0.20061	-10.9339	7.93321e-28	5.81573e-27
ENSG00000087085.17	ENST00000651875.1	13.4919	-0.252038	0.942847	-0.267316	0.789226	0.861704
ENSG00000087086.17	ENST00000853543.1	1147.06	-4.48479	0.196202	-22.8581	1.21491e-115	6.38796e-114
ENSG00000087087.21	ENST00000477529.1	335.321	-1.83198	0.231232	-7.92268	2.32443e-15	1.04994e-14
ENSG00000087088.22	ENST00000515540.5	194.323	-1.17943	0.24991	-4.7194	2.36544e-06	6.19261e-06
ENSG00000087095.14	ENST00000583517.1	270.656	-0.165615	0.152944	-1.08285	0.278877	0.365035
ENSG00000087116.18	ENST00000522937.1	13.487	0.10473	0.671588	0.155944	0.876077	0.936081
ENSG00000087152.17	ENST00000591295.5	415.409	-2.16812	0.284096	-7.63164	2.31784e-14	9.91951e-14
ENSG00000087157.20	ENST00000586880.1	208.998	-0.473181	0.229486	-2.06191	0.0392159	0.063137
ENSG00000087191.15	ENST00000579031.5	306.04	-2.03616	0.227939	-8.93293	4.14871e-19	2.19675e-18
ENSG00000087206.18	ENST00000510376.1	37.888	-0.584063	0.394391	-1.48092	0.138627	0.198114
ENSG00000087237.13	ENST00000569082.1	101.61	3.29042	1.68754	1.94983	0.051196	0.0807081
ENSG00000087245.13	ENST00000566564.1	24.0194	-2.71326	0.702108	-3.86445	0.00011134	0.000251356
ENSG00000087253.14	ENST00000566375.1	13.0338	-2.17616	0.83624	-2.60231	0.00925974	0.0165681
ENSG00000087258.18	ENST00000569295.6	4.06249	-1.54612	1.38564	-1.11582	0.264499	0.349039
ENSG00000087263.18	ENST00000569645.1	75.9315	-0.811425	0.283069	-2.86652	0.00415005	0.00780129
ENSG00000087266.19	ENST00000504450.1	241.566	0.136174	0.276706	0.492126	0.622631	0.710857
ENSG00000087269.17	ENST00000507120.1	511.376	-0.808957	0.148002	-5.46587	4.60651e-08	1.36509e-07
ENSG00000087274.20	ENST00000538860.1	338.208	-2.3949	0.202449	-11.8296	2.74374e-32	2.34493e-31
ENSG00000087299.13	ENST00000555610.1	240.384	1.33387	0.201024	6.63541	3.23603e-11	1.17381e-10
ENSG00000087301.11	ENST00000557374.1	425.004	1.55113	0.162137	9.56677	1.10299e-21	6.48847e-21
ENSG00000087302.10	ENST00000553479.1	264.806	-4.21695	0.384883	-10.9564	6.18937e-28	4.55559e-27
ENSG00000087303.19	ENST00000553297.1	67.7728	-1.24873	0.333227	-3.7474	0.000178679	0.000394694
ENSG00000087338.6	ENST00000468386.2	158.704	1.17006	0.200798	5.82705	5.64143e-09	1.78227e-08
ENSG00000087365.17	ENST00000531041.1	260.169	-2.43558	0.245182	-9.93376	2.96858e-23	1.85311e-22
ENSG00000087448.12	ENST00000381271.7	617.243	-1.16324	0.116419	-9.99187	1.65436e-23	1.04183e-22
ENSG00000087460.29	ENST00000656419.1	3496.69	-3.62768	0.115049	-31.5315	3.21402e-218	6.25996e-216
ENSG00000087470.22	ENST00000547640.1	202.377	-1.76332	0.223728	-7.88151	3.23451e-15	1.45045e-14
ENSG00000087494.17	ENST00000535992.5	7.70623	-3.73223	1.64149	-2.27368	0.022985	0.0385843
ENSG00000087495.18	ENST00000473657.1	2.59636	-2.74148	1.56073	-1.75654	0.0789963	0.119609
ENSG00000087502.20	ENST00000548098.1	62.4525	-1.29685	0.345513	-3.75341	0.000174442	0.000385775
ENSG00000087510.8	ENST00000882953.1	81.6259	-1.38272	0.34013	-4.06529	4.79729e-05	0.000112031
ENSG00000087586.19	ENST00000456249.5	190.924	-1.68915	0.210653	-8.01862	1.06939e-15	4.90937e-15
ENSG00000087589.18	ENST00000956166.1	52.4111	-0.0916015	0.418746	-0.218752	0.826843	0.894069
ENSG00000087884.17	ENST00000529666.1	184.682	1.42336	0.237178	6.00121	1.95854e-09	6.4006e-09
ENSG00000087903.14	ENST00000590822.1	178.091	2.19725	0.198636	11.0617	1.92498e-28	1.44681e-27
ENSG00000087995.17	ENST00000616852.1	517.391	-0.0602432	0.124307	-0.484631	0.627938	0.71575
ENSG00000088002.12	ENST00000201586.7	229.468	0.847513	0.950729	0.891435	0.372696	0.468813
ENSG00000088035.19	ENST00000650331.1	33.7158	-0.586713	0.43253	-1.35647	0.17495	0.242865
ENSG00000088038.21	ENST00000457463.1	627.947	-0.62536	0.174121	-3.59153	0.00032874	0.000705796
ENSG00000088179.10	ENST00000433888.5	540.226	1.72042	0.150196	11.4544	2.2338e-30	1.78872e-29
ENSG00000088205.14	ENST00000489933.1	100.512	-1.54692	0.248577	-6.22312	4.87353e-10	1.65319e-09
ENSG00000088256.9	ENST00000591301.1	58.4903	-3.03468	0.397248	-7.63927	2.18451e-14	9.35992e-14
ENSG00000088280.22	ENST00000484418.1	64.0104	-0.216534	0.412569	-0.524842	0.599693	0.689684
ENSG00000088298.14	ENST00000959814.1	332.718	0.29425	0.189641	1.55161	0.120755	0.175536
ENSG00000088305.20	ENST00000696245.1	356.249	-0.683936	0.169163	-4.04306	5.27582e-05	0.000122734
ENSG00000088325.17	ENST00000853953.1	2180.97	-1.02156	0.146238	-6.98563	2.83587e-12	1.08831e-11
ENSG00000088356.7	ENST00000902325.1	149.001	-1.62401	0.25316	-6.41496	1.40863e-10	4.9271e-10
ENSG00000088367.24	ENST00000479336.1	40.4633	-1.51055	0.441924	-3.41813	0.000630526	0.0013135
ENSG00000088386.18	ENST00000376494.1	7.75438	-1.32014	1.84217	-0.716622	0.473607	0.569771
ENSG00000088387.23	ENST00000473165.1	19.268	-1.52588	0.65374	-2.33408	0.0195913	0.033266
ENSG00000088448.15	ENST00000463156.1	159.957	-0.251086	0.20425	-1.2293	0.218959	0.295842
ENSG00000088451.12	ENST00000953437.1	253.118	-0.06646	0.17936	-0.37054	0.71098	0.791115
ENSG00000088538.14	ENST00000924010.1	3737.42	2.67141	0.0942756	28.3362	1.2399e-176	1.55247e-174
ENSG00000088543.16	ENST00000960620.1	18.1674	-0.875879	0.620803	-1.41088	0.15828	0.222505
ENSG00000088682.15	ENST00000569980.1	243.268	-1.48607	0.182611	-8.13786	4.02329e-16	1.88174e-15
ENSG00000088726.16	ENST00000480698.1	22.4185	0.26279	2.14068	0.12276	0.902297	0.948885
ENSG00000088727.15	ENST00000489391.1	9.20608	1.58468	1.41873	1.11696	0.26401	0.348604
ENSG00000088756.14	ENST00000583410.1	90.0759	2.00446	0.28265	7.09167	1.32507e-12	5.18291e-12
ENSG00000088766.13	ENST00000489345.5	304.452	0.874106	0.183894	4.75332	2.00108e-06	5.27234e-06
ENSG00000088808.19	ENST00000557744.1	30.1373	0.0897893	0.442216	0.203044	0.839101	0.904595
ENSG00000088812.19	ENST00000446916.2	542.445	0.77716	0.110296	7.04615	1.83933e-12	7.13692e-12
ENSG00000088826.19	ENST00000466004.1	4.76366	-4.50189	1.90455	-2.36375	0.0180908	0.0309112
ENSG00000088827.15	ENST00000419548.4	6.51151	1.70535	2.26227	0.753823	0.450955	0.54762
ENSG00000088832.19	ENST00000474657.6	1364.5	-2.55976	0.109906	-23.2903	5.55309e-120	3.14596e-118
ENSG00000088836.15	ENST00000488544.1	10.0469	-1.32041	0.825225	-1.60006	0.109585	0.161056
ENSG00000088854.14	ENST00000619760.1	43.0196	1.72391	0.33009	5.22255	1.76479e-07	5.03299e-07
ENSG00000088876.14	ENST00000465019.1	148.814	-0.484672	0.204037	-2.37541	0.0175293	0.0300173
ENSG00000088881.22	ENST00000481662.2	41.4551	0.773787	0.338256	2.28758	0.0221621	0.0373018
ENSG00000088882.9	ENST00000921882.1	141.71	-0.0888069	0.224121	-0.396245	0.691924	0.773988
ENSG00000088888.19	ENST00000883971.1	358.575	-0.689983	0.208828	-3.30407	0.000952915	0.0019459
ENSG00000088899.17	ENST00000875482.1	131.471	-0.401124	0.294398	-1.36252	0.173033	0.240541
ENSG00000088930.9	ENST00000948643.1	1814.75	0.930061	0.112595	8.26025	1.45363e-16	6.93338e-16
ENSG00000088970.17	ENST00000423272.1	15.0174	0.300864	0.743991	0.404391	0.685925	0.768343
ENSG00000088986.12	ENST00000550178.1	455.234	-5.39562	0.316602	-17.0422	3.99086e-65	8.49682e-64
ENSG00000088992.19	ENST00000549210.1	14.2421	-0.695897	0.595694	-1.16821	0.242721	0.323899
ENSG00000089009.17	ENST00000548343.1	1760.7	-3.95852	0.120977	-32.7213	7.78103e-235	2.05246e-232
ENSG00000089022.15	ENST00000547305.1	50.6589	-0.381671	0.359842	-1.06066	0.288843	0.376264
ENSG00000089041.18	ENST00000535928.5	24.0994	0.582125	0.926347	0.62841	0.529736	0.624569
ENSG00000089048.16	ENST00000874579.1	371.633	0.816486	0.197025	4.14408	3.41178e-05	8.06962e-05
ENSG00000089050.17	ENST00000337227.9	206.907	-2.3899	0.214553	-11.139	8.10427e-29	6.17051e-28
ENSG00000089053.14	ENST00000535463.1	88.4802	-0.193032	0.268292	-0.719486	0.471842	0.568133
ENSG00000089057.16	ENST00000949268.1	1049.79	-0.177266	0.106855	-1.65894	0.0971288	0.144357
ENSG00000089060.13	ENST00000548186.5	45.5573	-0.000677886	0.43952	-0.00154233	0.998769	0.99927
ENSG00000089063.17	ENST00000852465.1	698.54	-1.06561	0.133134	-8.00405	1.20395e-15	5.51326e-15
ENSG00000089091.18	ENST00000699608.1	93.871	1.17706	0.271525	4.33499	1.45764e-05	3.56037e-05
ENSG00000089094.21	ENST00000536036.1	120.259	-2.1221	0.293034	-7.24183	4.4268e-13	1.77267e-12
ENSG00000089116.4	ENST00000261731.4	1.66997	0.26279	3.25134	0.0808251	0.935581	0.955933
ENSG00000089123.17	ENST00000465381.5	899.477	1.86809	0.142055	13.1504	1.69228e-39	1.82614e-38
ENSG00000089127.15	ENST00000681194.1	2.43236	0.26279	3.29575	0.0797359	0.936447	0.956376
ENSG00000089154.12	ENST00000548132.1	167.018	-1.29978	0.26993	-4.81524	1.47026e-06	3.91892e-06
ENSG00000089157.17	ENST00000546564.5	4776.61	-4.44306	0.183198	-24.2527	6.18727e-130	3.99117e-128
ENSG00000089159.18	ENST00000552550.5	79.3138	-1.37636	0.338462	-4.06652	4.77206e-05	0.000111468
ENSG00000089163.6	ENST00000536460.1	8.84716	-2.80161	1.15469	-2.42629	0.015254	0.0263693
ENSG00000089169.16	ENST00000546426.5	372.247	2.92583	0.658921	4.44033	8.98197e-06	2.23619e-05
ENSG00000089177.21	ENST00000450176.1	67.1182	1.33912	0.345774	3.87282	0.000107584	0.000243261
ENSG00000089195.16	ENST00000493972.1	98.3713	-0.682448	0.372811	-1.83055	0.0671679	0.103328
ENSG00000089199.11	ENST00000455042.1	1.25983	1.84304	2.47695	0.744075	0.456831	0.553297
ENSG00000089220.6	ENST00000942724.1	1414.89	-3.69897	0.171538	-21.5635	3.95251e-103	1.72618e-101
ENSG00000089225.21	ENST00000526441.1	4.09061	0.262786	6.12072	0.0429338	0.965754	0.972157
ENSG00000089234.17	ENST00000871569.1	513.421	0.0734108	0.113899	0.644524	0.519236	0.614401
ENSG00000089248.8	ENST00000546477.1	239.821	-1.95949	0.19608	-9.99333	1.63004e-23	1.02673e-22
ENSG00000089280.21	ENST00000487974.1	590.491	-0.891289	0.206517	-4.31582	1.59013e-05	3.87067e-05
ENSG00000089289.17	ENST00000943388.1	445.893	0.49794	0.121056	4.11329	3.90055e-05	9.18245e-05
ENSG00000089335.23	ENST00000509196.1	162.49	-1.77519	0.26198	-6.77608	1.23481e-11	4.57426e-11
ENSG00000089351.16	ENST00000603907.1	93.2183	-1.35079	0.310735	-4.34709	1.37958e-05	3.37765e-05
ENSG00000089486.18	ENST00000589890.1	78.697	-2.71509	0.385682	-7.03971	1.92645e-12	7.4675e-12
ENSG00000089558.9	ENST00000264661.4	132.378	0.585467	0.726754	0.805592	0.420478	0.517167
ENSG00000089639.12	ENST00000586269.1	31.9143	-0.345135	0.493572	-0.699261	0.484389	0.580344
ENSG00000089682.19	ENST00000471079.1	86.9219	0.671095	0.277582	2.41765	0.0156211	0.0269603
ENSG00000089685.16	ENST00000590449.1	247.888	-2.88631	0.29906	-9.65127	4.85529e-22	2.89776e-21
ENSG00000089692.10	ENST00000441671.6	153.193	1.76467	0.519911	3.39418	0.000688335	0.00142783
ENSG00000089693.12	ENST00000541305.1	574.554	-3.10582	0.178874	-17.3631	1.56893e-67	3.50359e-66
ENSG00000089723.11	ENST00000203664.10	51.2645	-2.04774	0.369397	-5.54346	2.96551e-08	8.92309e-08
ENSG00000089737.20	ENST00000553400.1	194.369	-3.41313	0.302064	-11.2994	1.32188e-29	1.03406e-28
ENSG00000089775.13	ENST00000922511.1	66.2453	-0.0292915	0.297603	-0.0984248	0.921595	0.950269
ENSG00000089818.18	ENST00000640091.1	144.197	-2.37988	0.225179	-10.5688	4.1563e-26	2.85969e-25
ENSG00000089847.14	ENST00000597689.5	31.5055	2.2028	0.482924	4.56138	5.08191e-06	1.29363e-05
ENSG00000089876.13	ENST00000415732.1	206.916	0.406709	0.172379	2.35938	0.0183053	0.0312486
ENSG00000089902.11	ENST00000559597.1	49.4705	-1.48018	0.408098	-3.62703	0.000286704	0.000619602
ENSG00000089916.19	ENST00000556109.1	101.832	-0.424166	0.219154	-1.93547	0.0529322	0.0832268
ENSG00000090006.19	ENST00000595529.1	75.1948	1.50907	0.380617	3.96479	7.34603e-05	0.000168673
ENSG00000090013.12	ENST00000601346.5	37.3189	-0.912418	0.402976	-2.2642	0.0235618	0.0394788
ENSG00000090020.12	ENST00000490329.1	103.845	-1.91196	0.340979	-5.60728	2.05537e-08	6.25374e-08
ENSG00000090054.17	ENST00000469778.1	174.62	-1.23836	0.223288	-5.54601	2.9227e-08	8.79772e-08
ENSG00000090060.20	ENST00000554135.1	457.23	-1.8652	0.285033	-6.5438	5.99758e-11	2.14375e-10
ENSG00000090061.18	ENST00000555942.1	63.2983	-1.06536	0.384849	-2.76825	0.00563577	0.0103953
ENSG00000090238.13	ENST00000570099.5	59.6854	-0.439415	0.342504	-1.28295	0.19951	0.272929
ENSG00000090263.17	ENST00000496641.1	85.2778	-1.93613	0.375328	-5.15849	2.48949e-07	7.0155e-07
ENSG00000090273.15	ENST00000484772.1	128.004	-1.5905	0.245047	-6.49059	8.54997e-11	3.0293e-10
ENSG00000090339.10	ENST00000592686.1	0.841112	-2.7824	3.45546	-0.805217	0.420694	0.517404
ENSG00000090372.15	ENST00000601869.1	665.722	-1.87055	0.187268	-9.98864	1.7091e-23	1.0759e-22
ENSG00000090376.12	ENST00000545837.1	1.09507	3.06055	2.91336	1.05052	0.293478	0.381417
ENSG00000090382.7	ENST00000548839.1	17.4918	0.26279	2.1334	0.123179	0.901965	0.948885
ENSG00000090432.8	ENST00000925240.1	274.804	-2.58616	0.274489	-9.42175	4.43615e-21	2.54514e-20
ENSG00000090447.13	ENST00000575672.1	91.6545	-1.96933	0.350881	-5.61255	1.99372e-08	6.07169e-08
ENSG00000090470.15	ENST00000559051.1	12.8214	-0.954132	0.703147	-1.35695	0.174798	0.242675
ENSG00000090487.12	ENST00000559199.5	468.266	-1.41211	0.155732	-9.06754	1.21729e-19	6.5985e-19
ENSG00000090512.13	ENST00000488561.1	11.8262	0.26279	2.16477	0.121394	0.903379	0.948885
ENSG00000090520.13	ENST00000679794.1	124.923	-1.49583	0.269183	-5.55693	2.74568e-08	8.28255e-08
ENSG00000090530.11	ENST00000482780.1	5.29289	-0.901433	1.04694	-0.861013	0.389231	0.4865
ENSG00000090534.21	ENST00000477594.1	0.687375	0.846364	2.99114	0.282957	0.77721	0.850795
ENSG00000090539.17	ENST00000486066.5	16.417	0.260397	1.16016	0.22445	0.822407	0.890223
ENSG00000090554.14	ENST00000597914.1	4.66554	0.904291	1.05043	0.860879	0.389305	0.486583
ENSG00000090565.18	ENST00000495663.1	133.226	2.38749	0.228491	10.449	1.48131e-25	1.0017e-24
ENSG00000090581.12	ENST00000684100.1	117.386	-0.528263	0.284336	-1.85788	0.0631858	0.0977147
ENSG00000090612.23	ENST00000546126.7	267.494	-0.386864	0.188652	-2.05068	0.0402984	0.0647629
ENSG00000090621.16	ENST00000492519.1	570.689	-2.49772	0.273509	-9.13214	6.71613e-20	3.68385e-19
ENSG00000090659.18	ENST00000315599.12	1.26376	0.262789	4.10129	0.0640746	0.948911	0.964209
ENSG00000090661.14	ENST00000599275.1	6.19141	-0.557114	1.06993	-0.520702	0.602574	0.692432
ENSG00000090674.17	ENST00000602227.1	24.793	-1.45696	0.606762	-2.4012	0.0163413	0.0281068
ENSG00000090686.17	ENST00000487880.2	157.777	1.37039	0.2469	5.55038	2.85042e-08	8.58809e-08
ENSG00000090776.7	ENST00000851101.1	199.425	-2.69885	0.229206	-11.7748	5.26625e-32	4.45777e-31
ENSG00000090857.15	ENST00000564563.1	254.706	-0.359581	0.18947	-1.89782	0.0577195	0.0900319
ENSG00000090861.18	ENST00000569825.2	321.401	-1.51093	0.191333	-7.89687	2.8599e-15	1.2854e-14
ENSG00000090863.13	ENST00000561942.1	159.204	-0.173236	0.233524	-0.741832	0.458189	0.554648
ENSG00000090889.13	ENST00000485406.1	85.4067	-0.418745	0.270751	-1.54661	0.121958	0.177104
ENSG00000090905.20	ENST00000568750.1	147.169	-0.639814	0.204287	-3.13194	0.00173658	0.00343406
ENSG00000090924.16	ENST00000600210.1	200.625	-0.62016	0.21071	-2.9432	0.00324842	0.00620243
ENSG00000090932.12	ENST00000205143.4	58.9123	-1.99006	0.433287	-4.59294	4.37037e-06	1.11836e-05
ENSG00000090989.19	ENST00000506936.1	36.899	-1.33659	0.42639	-3.13466	0.00172056	0.00340472
ENSG00000091009.9	ENST00000508019.1	90.0563	-0.390597	0.348546	-1.12065	0.262437	0.346847
ENSG00000091010.7	ENST00000646991.2	8.54153	0.262547	1.62184	0.161882	0.871398	0.932121
ENSG00000091039.18	ENST00000548485.1	172.538	-1.88878	0.304198	-6.20905	5.33068e-10	1.80423e-09
ENSG00000091073.21	ENST00000465488.1	17.1695	-0.20147	0.673904	-0.298959	0.764971	0.839613
ENSG00000091106.20	ENST00000652197.2	12.2135	0.844763	1.44674	0.583907	0.559283	0.653228
ENSG00000091127.15	ENST00000482157.1	542.591	0.934697	0.127094	7.35441	1.91779e-13	7.83316e-13
ENSG00000091128.13	ENST00000471677.5	7.25234	1.70562	2.23328	0.76373	0.445028	0.541567
ENSG00000091129.23	ENST00000489800.1	28.1844	0.0611792	0.511656	0.119571	0.904823	0.948885
ENSG00000091136.16	ENST00000676592.1	46.9111	-1.72566	0.45807	-3.76725	0.000165054	0.000365917
ENSG00000091137.15	ENST00000460748.1	2.20294	0.26279	2.91866	0.0900379	0.928257	0.952645
ENSG00000091140.16	ENST00000489184.1	193.057	-2.27475	0.317265	-7.16986	7.50731e-13	2.97366e-12
ENSG00000091157.15	ENST00000585754.1	28.6148	0.124541	0.399553	0.311701	0.755268	0.830719
ENSG00000091164.14	ENST00000588615.1	8.85517	-0.121986	0.827702	-0.147379	0.882833	0.941599
ENSG00000091181.20	ENST00000466722.1	1.50403	3.7049	2.36906	1.56387	0.117848	0.17176
ENSG00000091262.18	ENST00000575728.1	9.90577	-0.393824	0.782928	-0.503014	0.614955	0.703866
ENSG00000091317.9	ENST00000205636.4	599.527	-1.61696	0.140399	-11.5169	1.08414e-30	8.76864e-30
ENSG00000091428.19	ENST00000473182.2	12.8707	-0.143573	0.572922	-0.250597	0.802126	0.872639
ENSG00000091436.18	ENST00000422149.1	374.762	1.91762	0.183831	10.4315	1.78135e-25	1.20097e-24
ENSG00000091482.9	ENST00000941554.1	9.85201	-1.32785	1.36178	-0.975086	0.329518	0.42141
ENSG00000091483.9	ENST00000497042.1	83.0336	-3.36132	0.379853	-8.84901	8.83001e-19	4.61429e-18
ENSG00000091490.12	ENST00000514321.1	11.7232	0.575421	0.665199	0.865036	0.387019	0.484189
ENSG00000091513.17	ENST00000493011.5	45.9437	1.84772	1.28365	1.43942	0.150031	0.212242
ENSG00000091527.18	ENST00000420115.6	1956.08	-2.22539	0.129362	-17.2029	2.5257e-66	5.51381e-65
ENSG00000091542.9	ENST00000490106.1	1124.47	-3.39311	0.172933	-19.6209	1.02427e-85	3.28536e-84
ENSG00000091583.12	ENST00000577982.1	3.16742	2.7047	2.27638	1.18816	0.234769	0.314466
ENSG00000091592.17	ENST00000574406.1	61.269	-4.34767	0.711599	-6.10972	9.98052e-10	3.32819e-09
ENSG00000091622.16	ENST00000575201.2	28.18	0.355995	0.566828	0.628047	0.529973	0.624797
ENSG00000091651.10	ENST00000567000.2	277.786	-0.097217	0.167207	-0.581416	0.56096	0.654905
ENSG00000091656.19	ENST00000522409.1	19.5824	-1.17841	0.589997	-1.99731	0.0457918	0.0729031
ENSG00000091664.9	ENST00000534115.1	2.06621	0.262788	5.01693	0.0523802	0.958226	0.970298
ENSG00000091704.10	ENST00000491460.5	8.35056	0.26279	2.30073	0.114221	0.909063	0.948885
ENSG00000091732.19	ENST00000480193.5	161.979	0.673392	0.207667	3.24266	0.0011842	0.0023906
ENSG00000091831.26	ENST00000446550.1	19.5458	1.70554	2.11913	0.804831	0.420917	0.517619
ENSG00000091844.9	ENST00000914255.1	442.167	1.39992	0.148006	9.45856	3.1222e-21	1.80155e-20
ENSG00000091879.15	ENST00000629816.3	39.1984	0.0716805	0.441978	0.162181	0.871163	0.931907
ENSG00000091947.11	ENST00000591162.1	193.613	0.840434	0.314446	2.67274	0.00752338	0.0136402
ENSG00000091972.20	ENST00000714211.1	9.1636	1.70559	2.18743	0.779722	0.435554	0.532171
ENSG00000091986.17	ENST00000469554.1	6.77726	-5.33993	1.68866	-3.16224	0.00156562	0.00311378
ENSG00000092010.16	ENST00000559123.5	158.595	-4.13112	0.389424	-10.6083	2.72751e-26	1.89572e-25
ENSG00000092020.12	ENST00000555614.5	150.737	0.934654	0.214677	4.35376	1.33822e-05	3.28135e-05
ENSG00000092036.20	ENST00000553420.1	49.0647	-0.312942	0.355176	-0.88109	0.378269	0.474908
ENSG00000092051.19	ENST00000553505.1	66.5507	-0.475458	1.10211	-0.431408	0.666172	0.750431
ENSG00000092054.15	ENST00000965958.1	30.1927	0.26279	2.14698	0.1224	0.902582	0.948885
ENSG00000092067.7	ENST00000696121.1	6.52726	0.26279	2.23527	0.117565	0.906412	0.948885
ENSG00000092068.21	ENST00000397310.6	159.394	-3.01639	0.315807	-9.55135	1.28015e-21	7.50855e-21
ENSG00000092094.12	ENST00000554915.1	77.997	-1.27975	0.278682	-4.59215	4.38701e-06	1.12246e-05
ENSG00000092098.19	ENST00000560631.1	21.8965	-0.3374	0.516926	-0.652705	0.513946	0.609269
ENSG00000092108.23	ENST00000553278.1	129.415	-0.159366	0.278355	-0.572527	0.566965	0.660705
ENSG00000092140.17	ENST00000552488.1	574.703	1.82908	0.153599	11.9082	1.07289e-32	9.28509e-32
ENSG00000092148.15	ENST00000556281.1	89.5447	-2.08493	0.298125	-6.99348	2.68158e-12	1.03097e-11
ENSG00000092199.20	ENST00000553444.1	2654.35	-3.94546	0.156885	-25.1487	1.46069e-139	1.08093e-137
ENSG00000092203.16	ENST00000463119.1	176.051	-3.15865	0.273721	-11.5397	8.32244e-31	6.75368e-30
ENSG00000092208.20	ENST00000525430.1	94.7406	-0.715631	0.251849	-2.84151	0.00449002	0.00839784
ENSG00000092330.20	ENST00000558510.1	36.8318	-3.4118	0.6223	-5.48256	4.19211e-08	1.24669e-07
ENSG00000092345.14	ENST00000454457.1	8.12081	0.26279	2.34939	0.111854	0.910939	0.948885
ENSG00000092421.18	ENST00000503865.1	90.2798	-2.22333	0.359714	-6.18084	6.37619e-10	2.14943e-09
ENSG00000092439.16	ENST00000560516.1	130.283	0.696538	0.355061	1.96174	0.0497925	0.0787278
ENSG00000092445.13	ENST00000568490.1	163.315	-1.87818	0.299135	-6.27872	3.41373e-10	1.16891e-09
ENSG00000092470.13	ENST00000478130.1	238.421	-0.00475395	0.151252	-0.0314307	0.974926	0.979714
ENSG00000092529.26	ENST00000673893.1	1.96952	1.26697	2.7737	0.456781	0.647829	0.733629
ENSG00000092531.11	ENST00000563333.1	118.838	-0.750517	0.239374	-3.13533	0.0017166	0.00339732
ENSG00000092607.15	ENST00000207157.7	117.071	1.94491	0.287128	6.77368	1.25549e-11	4.64888e-11
ENSG00000092621.14	ENST00000482968.1	768.268	-3.30725	0.219299	-15.081	2.15966e-51	3.24624e-50
ENSG00000092758.19	ENST00000467819.5	51.7631	-0.243314	0.420484	-0.578653	0.562824	0.656763
ENSG00000092820.20	ENST00000923501.1	2099.18	-0.478553	0.117774	-4.06332	4.83806e-05	0.000112938
ENSG00000092847.15	ENST00000931710.1	2691.77	-0.383224	0.0718734	-5.33193	9.71728e-08	2.8201e-07
ENSG00000092850.13	ENST00000922204.1	78.7875	0.525743	0.562038	0.935423	0.34957	0.443566
ENSG00000092853.15	ENST00000466308.1	130.349	-0.835066	0.230131	-3.62866	0.000284894	0.000615887
ENSG00000092871.18	ENST00000414419.6	339.962	1.92824	0.169051	11.4063	3.88988e-30	3.09538e-29
ENSG00000092931.13	ENST00000590393.1	178.569	-0.0213376	0.237935	-0.0896779	0.928543	0.952828
ENSG00000092964.18	ENST00000493789.6	185.681	-2.1156	0.253394	-8.34904	6.88203e-17	3.32999e-16
ENSG00000092969.12	ENST00000479322.1	26.1444	-0.901577	0.692475	-1.30196	0.192929	0.265038
ENSG00000092978.12	ENST00000489246.6	47.2163	1.06868	0.343042	3.1153	0.00183757	0.00362284
ENSG00000093000.20	ENST00000469163.1	1095.21	-2.24587	0.122767	-18.2937	9.29626e-75	2.41503e-73
ENSG00000093009.12	ENST00000455750.6	158.071	-0.29456	0.236833	-1.24374	0.213594	0.289698
ENSG00000093010.16	ENST00000493893.1	94.2119	-2.62064	0.326233	-8.03303	9.50967e-16	4.3754e-15
ENSG00000093144.20	ENST00000488087.1	84.1265	0.0832552	0.33441	0.248961	0.803391	0.873783
ENSG00000093167.19	ENST00000483306.2	32.3309	-0.235701	0.402141	-0.586115	0.557798	0.651809
ENSG00000093217.12	ENST00000487569.1	50.9622	1.12292	0.299267	3.75224	0.000175265	0.000387493
ENSG00000094631.23	ENST00000697247.1	178.263	-0.670714	0.223488	-3.00112	0.00268991	0.00518714
ENSG00000094804.13	ENST00000648633.1	161.198	-1.79858	0.235103	-7.65018	2.00691e-14	8.61655e-14
ENSG00000094841.15	ENST00000373373.8	99.3761	1.07648	0.224977	4.78484	1.71127e-06	4.53501e-06
ENSG00000094880.12	ENST00000464806.1	197.767	-2.77242	0.247716	-11.1919	4.46701e-29	3.43262e-28
ENSG00000094914.15	ENST00000550033.5	290.608	-2.25216	0.198679	-11.3356	8.73835e-30	6.87318e-29
ENSG00000094916.17	ENST00000930392.1	6494.91	-2.17562	0.0851781	-25.5421	6.72448e-144	5.24694e-142
ENSG00000094975.15	ENST00000609685.1	32.5209	-1.3892	0.445028	-3.12161	0.00179866	0.00355006
ENSG00000095002.17	ENST00000918108.1	1362.59	0.258296	0.0994314	2.59773	0.00938419	0.0167789
ENSG00000095015.7	ENST00000469188.1	141.191	-1.79729	0.261759	-6.86618	6.59422e-12	2.47984e-11
ENSG00000095059.18	ENST00000593432.1	175.041	-0.693723	0.235272	-2.94861	0.00319211	0.00609983
ENSG00000095066.13	ENST00000589765.1	1606	-2.73681	0.176866	-15.4739	5.20274e-54	8.41193e-53
ENSG00000095110.10	ENST00000539878.5	4.30828	0.26279	2.45016	0.107254	0.914587	0.94922
ENSG00000095139.16	ENST00000954507.1	2610.58	-1.9924	0.100917	-19.743	9.21684e-87	3.00845e-85
ENSG00000095203.16	ENST00000374557.4	280.854	0.432022	0.250928	1.7217	0.0851242	0.127914
ENSG00000095209.13	ENST00000434214.1	190.344	-0.538238	0.206208	-2.61016	0.0090499	0.0162161
ENSG00000095261.15	ENST00000476949.1	101.893	0.262879	1.46349	0.179625	0.857447	0.920799
ENSG00000095303.18	ENST00000426608.6	12.1857	-0.103378	1.0138	-0.101971	0.91878	0.949783
ENSG00000095319.15	ENST00000467044.1	417.032	-1.49834	0.147876	-10.1324	3.96911e-24	2.56172e-23
ENSG00000095321.19	ENST00000467343.1	34.3114	-1.56353	0.577768	-2.70615	0.00680682	0.0124208
ENSG00000095370.21	ENST00000484160.1	4.33882	-2.18987	2.26912	-0.965073	0.334508	0.427039
ENSG00000095380.12	ENST00000480925.1	139.56	-1.81024	0.311977	-5.80249	6.53364e-09	2.05423e-08
ENSG00000095383.20	ENST00000375063.5	27.4543	0.213302	0.534957	0.398727	0.690094	0.772274
ENSG00000095397.19	ENST00000673697.1	22.2569	-0.716835	0.631335	-1.13543	0.256196	0.33971
ENSG00000095485.19	ENST00000478047.1	399.26	0.13375	0.123927	1.07927	0.280469	0.366817
ENSG00000095539.17	ENST00000484128.2	53.9781	-0.47866	0.441422	-1.08436	0.278206	0.364272
ENSG00000095564.16	ENST00000476401.1	79.3093	-0.900216	0.324558	-2.77367	0.00554284	0.0102322
ENSG00000095574.13	ENST00000904857.1	652.135	-1.01511	0.166534	-6.09548	1.09107e-09	3.63036e-09
ENSG00000095585.19	ENST00000495266.2	140.154	0.26279	2.05609	0.127811	0.898299	0.948885
ENSG00000095587.10	ENST00000506028.2	28.1576	-2.76756	1.73143	-1.59843	0.109947	0.161525
ENSG00000095596.12	ENST00000622925.1	9.5435	-4.22999	1.25819	-3.36196	0.000773907	0.001596
ENSG00000095627.11	ENST00000695399.1	2.9331	0.26279	2.70077	0.0973021	0.922487	0.950535
ENSG00000095637.24	ENST00000472854.5	12.6756	-0.345196	0.711799	-0.484963	0.627703	0.715531
ENSG00000095713.15	ENST00000436034.1	98.0036	1.00042	0.781881	1.2795	0.200721	0.274437
ENSG00000095739.12	ENST00000497699.1	219.908	-3.59753	0.299251	-12.0218	2.73088e-33	2.40376e-32
ENSG00000095752.7	ENST00000264563.7	145.108	0.0411627	0.829031	0.0496516	0.9604	0.971483
ENSG00000095777.18	ENST00000477691.2	10.8057	1.46004	0.718783	2.03126	0.0422283	0.0676374
ENSG00000095787.27	ENST00000530865.5	475.927	-1.08925	0.159186	-6.84266	7.77341e-12	2.91255e-11
ENSG00000095794.21	ENST00000489321.5	342.47	1.82334	0.162349	11.231	2.87148e-29	2.22062e-28
ENSG00000095932.7	ENST00000586804.1	22.0191	0.26279	2.10798	0.124664	0.900789	0.948885
ENSG00000095951.19	ENST00000484210.1	228.394	1.49979	0.197261	7.60307	2.89183e-14	1.23064e-13
ENSG00000095981.11	ENST00000437525.3	1.85031	0.26279	2.922	0.0899351	0.928339	0.952695
ENSG00000096060.16	ENST00000542713.1	868.195	1.6864	0.125111	13.4792	2.07391e-41	2.3706e-40
ENSG00000096063.17	ENST00000502969.1	337.406	-0.47833	0.182621	-2.61926	0.00881219	0.0158154
ENSG00000096070.20	ENST00000532538.1	88.1305	-1.68905	0.270471	-6.24486	4.24171e-10	1.44402e-09
ENSG00000096080.13	ENST00000890921.1	323.566	-1.11193	0.179232	-6.20388	5.50879e-10	1.86336e-09
ENSG00000096088.17	ENST00000425343.6	17.9984	0.26279	2.12983	0.123385	0.901802	0.948885
ENSG00000096092.7	ENST00000872509.1	95.7922	-1.15177	0.281531	-4.0911	4.29327e-05	0.000100723
ENSG00000096264.14	ENST00000373086.3	12.3854	1.70538	2.19994	0.775194	0.438225	0.534722
ENSG00000096384.21	ENST00000371554.2	8102.84	-3.81561	0.0807649	-47.2434	0	0
ENSG00000096395.12	ENST00000266003.9	11.0177	0.26279	2.21525	0.118628	0.90557	0.948885
ENSG00000096401.9	ENST00000371477.4	1236.91	-0.159576	0.138561	-1.15166	0.24946	0.331778
ENSG00000096433.12	ENST00000931640.1	1071.8	0.313726	0.117294	2.6747	0.00747965	0.0135668
ENSG00000096654.17	ENST00000683788.1	145.552	-1.15042	0.240172	-4.78998	1.66796e-06	4.42427e-06
ENSG00000096696.17	ENST00000684395.1	768.518	-2.67386	0.154292	-17.3298	2.80235e-67	6.21314e-66
ENSG00000096717.13	ENST00000403579.1	959.417	-0.762751	0.180308	-4.23026	2.33418e-05	5.60785e-05
ENSG00000096746.19	ENST00000491200.5	1153.16	-1.03858	0.181324	-5.72772	1.0179e-08	3.16311e-08
ENSG00000096872.18	ENST00000494236.1	16.9973	0.930604	0.670718	1.38747	0.165298	0.231104
ENSG00000096968.15	ENST00000487310.1	17.204	-2.57747	0.830361	-3.10403	0.00190903	0.00375684
ENSG00000096996.16	ENST00000430026.7	289.586	0.26279	2.04741	0.128352	0.89787	0.948885
ENSG00000097007.21	ENST00000929255.1	2135.8	0.00228442	0.107771	0.021197	0.983088	0.98662
ENSG00000097021.22	ENST00000481175.1	143.778	0.0508619	0.225015	0.226037	0.821172	0.889202
ENSG00000097033.16	ENST00000616170.4	1223.51	-0.844668	0.155933	-5.41688	6.06485e-08	1.78336e-07
ENSG00000097046.14	ENST00000897935.1	1421.69	-0.0987454	0.152837	-0.646084	0.518225	0.613444
ENSG00000097096.11	ENST00000341460.6	490.836	-0.30112	0.163888	-1.83736	0.0661573	0.101913
ENSG00000099139.15	ENST00000455778.1	112.788	-0.785246	0.269467	-2.91407	0.00356751	0.00676998
ENSG00000099194.7	ENST00000884320.1	8356.99	-3.31122	0.0692412	-47.8214	0	0
ENSG00000099203.8	ENST00000941053.1	75.3454	-2.76877	0.372253	-7.43787	1.02323e-13	4.24009e-13
ENSG00000099204.23	ENST00000466400.1	97.3915	-1.72146	0.284157	-6.05812	1.37718e-09	4.54881e-09
ENSG00000099219.16	ENST00000688283.1	167.793	-1.82647	0.250276	-7.29782	2.92468e-13	1.18163e-12
ENSG00000099246.20	ENST00000684457.1	214.765	-1.13258	0.244051	-4.64075	3.47141e-06	8.95695e-06
ENSG00000099250.19	ENST00000413802.1	40.946	-1.96212	0.449754	-4.36266	1.28488e-05	3.1547e-05
ENSG00000099256.20	ENST00000376376.3	17.4826	0.62091	0.612097	1.0144	0.310393	0.4001
ENSG00000099260.13	ENST00000496843.1	6.51601	-1.15244	1.27937	-0.900786	0.367702	0.463486
ENSG00000099282.11	ENST00000470508.1	28.9912	-1.83932	0.515985	-3.56468	0.000364299	0.000778178
ENSG00000099284.15	ENST00000677507.1	42.5577	-3.40167	0.525095	-6.47819	9.28275e-11	3.28216e-10
ENSG00000099290.18	ENST00000399339.6	662.022	-0.136173	0.112939	-1.20572	0.227925	0.306356
ENSG00000099308.14	ENST00000609076.1	17.9435	0.551965	0.549546	1.0044	0.315185	0.405449
ENSG00000099330.10	ENST00000602236.5	19.0299	-1.95495	0.663413	-2.94681	0.00321067	0.00613403
ENSG00000099331.15	ENST00000593411.1	41.0976	0.0110718	0.358247	0.0309056	0.975345	0.980072
ENSG00000099337.6	ENST00000588137.1	21.7817	1.85126	1.10284	1.67862	0.0932257	0.139012
ENSG00000099338.23	ENST00000492088.3	66.2574	1.26335	1.06024	1.19157	0.233429	0.312921
ENSG00000099341.13	ENST00000590331.1	420.808	-2.43539	0.206242	-11.8084	3.53119e-32	3.00606e-31
ENSG00000099364.18	ENST00000566320.2	524.433	-0.977002	0.205179	-4.7617	1.91968e-06	5.06416e-06
ENSG00000099365.12	ENST00000566211.1	43.4435	1.84812	1.70678	1.08281	0.278894	0.365056
ENSG00000099385.13	ENST00000215115.5	156.215	-0.978377	0.294834	-3.3184	0.000905362	0.00185332
ENSG00000099399.6	ENST00000378988.5	9.09474	-4.82854	1.6424	-2.93992	0.00328292	0.00626514
ENSG00000099617.4	ENST00000215368.4	170.693	-0.401396	0.42227	-0.950567	0.341824	0.435066
ENSG00000099624.9	ENST00000614837.1	210.808	-3.14902	0.311691	-10.103	5.35622e-24	3.43689e-23
ENSG00000099625.15	ENST00000589260.5	23.34	-1.0265	0.636735	-1.61213	0.106933	0.157564
ENSG00000099783.14	ENST00000596295.1	965.194	-2.64395	0.135853	-19.4619	2.31228e-84	7.2373e-83
ENSG00000099785.12	ENST00000595213.1	129.534	0.263065	0.404328	0.650623	0.51529	0.610584
ENSG00000099795.8	ENST00000215565.3	173.775	-0.654844	0.188606	-3.47202	0.000516548	0.00108644
ENSG00000099797.16	ENST00000599101.5	429.457	-3.28074	0.247282	-13.2672	3.58786e-40	3.95841e-39
ENSG00000099804.10	ENST00000593036.4	67.8985	-2.49698	0.488851	-5.10785	3.25838e-07	9.10791e-07
ENSG00000099810.22	ENST00000584988.1	157.635	0.00969652	0.224789	0.043136	0.965593	0.972157
ENSG00000099814.18	ENST00000251181.8	58.9193	-1.61062	0.408474	-3.94301	8.0464e-05	0.000184164
ENSG00000099817.13	ENST00000586215.1	241.87	-2.25404	0.317527	-7.09874	1.25903e-12	4.93012e-12
ENSG00000099821.15	ENST00000592633.5	162.206	-3.16531	0.260241	-12.163	4.89444e-34	4.43506e-33
ENSG00000099822.3	ENST00000251287.3	690.483	-0.729131	0.199776	-3.64975	0.000262498	0.000569676
ENSG00000099840.14	ENST00000497445.5	9.00525	1.20539	1.03991	1.15913	0.246405	0.328221
ENSG00000099860.11	ENST00000904740.1	2251.02	-2.12751	0.293267	-7.25451	4.03104e-13	1.61781e-12
ENSG00000099864.19	ENST00000587513.3	183.467	-1.37263	0.337076	-4.07218	4.65747e-05	0.00010893
ENSG00000099866.17	ENST00000622449.2	1.96179	0.26279	2.85108	0.092172	0.926561	0.951933
ENSG00000099869.8	ENST00000381363.4	3.37981	0.26279	2.70803	0.0970409	0.922694	0.950633
ENSG00000099875.17	ENST00000589441.5	350.912	-2.39753	0.246991	-9.70695	2.8165e-22	1.6959e-21
ENSG00000099889.15	ENST00000495096.5	70.5894	0.272736	0.353438	0.771666	0.440313	0.536801
ENSG00000099899.17	ENST00000459644.1	93.2078	-0.116287	0.336007	-0.346086	0.729278	0.807718
ENSG00000099901.19	ENST00000486575.1	1002.52	-2.62789	0.163822	-16.0411	6.59411e-58	1.17505e-56
ENSG00000099904.17	ENST00000469212.5	91.1427	0.113637	0.318034	0.357309	0.72086	0.799902
ENSG00000099910.18	ENST00000423364.1	61.019	0.91539	0.331906	2.75798	0.00581602	0.0107087
ENSG00000099917.18	ENST00000436496.2	88.1582	-1.76175	0.325692	-5.40926	6.32852e-08	1.85868e-07
ENSG00000099937.12	ENST00000406799.1	28.3664	0.262167	2.1023	0.124705	0.900757	0.948885
ENSG00000099940.13	ENST00000215730.12	468.182	-0.63765	0.120784	-5.27926	1.29704e-07	3.73291e-07
ENSG00000099942.14	ENST00000894699.1	2518.05	-1.23523	0.0918984	-13.4413	3.46466e-41	3.9352e-40
ENSG00000099953.11	ENST00000460352.1	9.70045	-1.03804	0.895391	-1.15932	0.246327	0.328126
ENSG00000099954.20	ENST00000355219.4	459.699	-1.04942	0.127313	-8.24279	1.68241e-16	8.00089e-16
ENSG00000099956.21	ENST00000642727.1	152.522	0.26573	0.210671	1.26135	0.207182	0.282303
ENSG00000099958.16	ENST00000464034.5	16.5776	-0.950637	0.571794	-1.66255	0.096402	0.14336
ENSG00000099968.20	ENST00000479296.1	64.0679	1.12365	0.306489	3.6662	0.00024618	0.000535893
ENSG00000099974.9	ENST00000897122.1	69.345	-0.491434	0.316635	-1.55205	0.12065	0.175404
ENSG00000099977.17	ENST00000430101.2	191.835	-5.46645	0.512508	-10.6661	1.46694e-26	1.02934e-25
ENSG00000099985.4	ENST00000403389.1	8.02161	0.262786	6.12072	0.0429338	0.965754	0.972157
ENSG00000099991.19	ENST00000459824.1	51.4928	-1.03955	0.431417	-2.40962	0.0159692	0.0275203
ENSG00000099992.17	ENST00000466666.5	20.7802	-1.41674	0.670054	-2.11436	0.0344844	0.0560457
ENSG00000099994.12	ENST00000463101.1	23.3413	0.602408	0.673897	0.893917	0.371367	0.467384
ENSG00000099995.20	ENST00000485618.1	879.091	-3.01036	0.216551	-13.9014	6.21556e-44	7.60035e-43
ENSG00000099999.16	ENST00000421022.1	24.654	-0.331393	0.487364	-0.679969	0.496524	0.5919
ENSG00000100003.18	ENST00000485482.5	2.64314	3.58064	2.09534	1.70886	0.0874765	0.131143
ENSG00000100012.13	ENST00000435069.1	4.04518	0.26279	2.93124	0.0896513	0.928564	0.952832
ENSG00000100014.21	ENST00000472799.1	49.1692	-0.219181	0.321596	-0.68154	0.49553	0.590883
ENSG00000100023.20	ENST00000462188.1	338.601	-0.938543	0.164652	-5.70018	1.19682e-08	3.70017e-08
ENSG00000100024.16	ENST00000382760.2	32.1129	2.5843	1.63183	1.58369	0.113265	0.165879
ENSG00000100027.17	ENST00000672036.2	105.875	1.18202	0.324634	3.64107	0.000271502	0.000588261
ENSG00000100028.13	ENST00000468770.1	400.435	-2.75777	0.21322	-12.9339	2.89723e-38	3.01721e-37
ENSG00000100029.19	ENST00000441668.5	314.757	-2.90856	0.234273	-12.4153	2.15994e-35	2.03804e-34
ENSG00000100030.16	ENST00000491588.1	245.77	0.00646002	0.169549	0.0381012	0.969607	0.975273
ENSG00000100031.20	ENST00000490087.1	13.9013	-0.944848	0.92124	-1.02563	0.305068	0.394206
ENSG00000100034.14	ENST00000407142.5	585.228	-0.775324	0.186605	-4.15489	3.25442e-05	7.71786e-05
ENSG00000100036.13	ENST00000451479.1	111.16	0.217759	0.276657	0.787109	0.431218	0.527839
ENSG00000100038.21	ENST00000470338.1	35.5847	0.0599733	0.442584	0.135507	0.892211	0.948885
ENSG00000100053.10	ENST00000215855.7	18.5311	0.384572	0.499488	0.769933	0.44134	0.537861
ENSG00000100056.13	ENST00000472073.1	266.711	-0.528194	0.202636	-2.60662	0.00914419	0.0163731
ENSG00000100065.16	ENST00000486118.1	14.719	-1.32698	0.635864	-2.0869	0.0368971	0.0596865
ENSG00000100077.17	ENST00000455558.2	907.518	1.78712	0.137773	12.9714	1.77642e-38	1.86163e-37
ENSG00000100078.5	ENST00000927610.1	2.84065	0.26279	2.96604	0.0885995	0.9294	0.953018
ENSG00000100079.7	ENST00000416480.1	1.39717	0.262786	6.12072	0.0429338	0.965754	0.972157
ENSG00000100083.21	ENST00000463672.1	82.5544	-1.39631	0.292087	-4.78046	1.74898e-06	4.62992e-06
ENSG00000100095.20	ENST00000483291.1	3.18084	0.262786	6.12072	0.0429338	0.965754	0.972157
ENSG00000100097.13	ENST00000464120.1	12.9315	-2.05782	1.68714	-1.21971	0.222575	0.300124
ENSG00000100099.23	ENST00000479064.5	42.7733	-1.43381	0.381244	-3.76088	0.000169319	0.00037499
ENSG00000100100.15	ENST00000402249.7	8.46419	-1.02465	0.961262	-1.06595	0.286448	0.373513
ENSG00000100104.14	ENST00000471799.1	30.8008	-2.7172	0.473338	-5.74051	9.43912e-09	2.94019e-08
ENSG00000100105.19	ENST00000215919.3	223.651	-2.6496	0.221524	-11.9608	5.70073e-33	4.97033e-32
ENSG00000100106.22	ENST00000331103.5	24.7806	-1.26471	0.530221	-2.38524	0.0170678	0.0292763
ENSG00000100109.18	ENST00000481357.1	29.9398	-3.13139	0.506808	-6.17866	6.46483e-10	2.17838e-09
ENSG00000100122.8	ENST00000927865.1	2.52498	-3.99846	2.10182	-1.90238	0.0571214	0.0891692
ENSG00000100124.16	ENST00000498417.5	155.878	-0.589205	0.250663	-2.35059	0.0187438	0.0319319
ENSG00000100129.18	ENST00000482600.5	2133.52	-1.61555	0.114082	-14.1614	1.58899e-45	2.02867e-44
ENSG00000100138.15	ENST00000648161.1	664.207	-2.93291	0.18083	-16.2192	3.68956e-59	6.76911e-58
ENSG00000100139.15	ENST00000402631.1	796.332	-1.12143	0.174719	-6.41847	1.3765e-10	4.81755e-10
ENSG00000100142.17	ENST00000927752.1	285.579	-0.143391	0.192361	-0.745425	0.456015	0.55244
ENSG00000100150.21	ENST00000643075.1	16.135	0.0655794	0.638925	0.10264	0.918248	0.949783
ENSG00000100151.17	ENST00000476157.5	29.6741	-0.592933	0.395855	-1.49785	0.134171	0.1925
ENSG00000100154.15	ENST00000397906.7	7536.11	3.29513	0.072668	45.3451	0	0
ENSG00000100162.17	ENST00000460824.1	76.7487	-0.549257	0.349188	-1.57295	0.115729	0.169021
ENSG00000100167.21	ENST00000644076.2	458.054	-1.06554	0.177305	-6.00964	1.85937e-09	6.08413e-09
ENSG00000100191.6	ENST00000266086.6	89.8877	-0.323231	1.35102	-0.23925	0.810912	0.880181
ENSG00000100196.12	ENST00000471268.1	52.3289	-2.44963	0.424625	-5.76891	7.97843e-09	2.49501e-08
ENSG00000100197.24	ENST00000852656.1	7.80544	1.03846	0.858222	1.21001	0.226275	0.304433
ENSG00000100201.23	ENST00000477112.1	640.467	-1.71999	0.120648	-14.2563	4.09772e-46	5.3118e-45
ENSG00000100206.12	ENST00000464842.1	4.43899	0.270144	1.80888	0.149343	0.881283	0.940388
ENSG00000100207.21	ENST00000335626.8	1531.62	-0.135153	0.0927217	-1.45761	0.144947	0.205911
ENSG00000100209.12	ENST00000485599.5	62.851	0.522101	0.287541	1.81574	0.06941	0.106494
ENSG00000100211.13	ENST00000867955.1	114.761	-0.129123	0.241603	-0.53444	0.593037	0.683483
ENSG00000100216.7	ENST00000915616.1	593.576	-4.36986	0.233772	-18.6928	5.66674e-78	1.57554e-76
ENSG00000100218.12	ENST00000452757.5	1.79112	-2.19354	2.72718	-0.804324	0.42121	0.517904
ENSG00000100219.18	ENST00000484256.1	193.121	-3.3386	0.236656	-14.1074	3.41923e-45	4.33079e-44
ENSG00000100220.13	ENST00000498434.1	50.886	-1.16158	0.389699	-2.98071	0.00287585	0.00552799
ENSG00000100221.12	ENST00000456626.1	56.2348	-1.67635	0.422698	-3.96584	7.31373e-05	0.000167957
ENSG00000100225.19	ENST00000465418.1	97.1905	-1.88882	0.2633	-7.17364	7.30297e-13	2.89473e-12
ENSG00000100226.17	ENST00000475959.1	68.6386	-1.54593	0.308396	-5.01279	5.36465e-07	1.47587e-06
ENSG00000100228.15	ENST00000857886.1	174.375	-0.879226	0.223483	-3.93419	8.34764e-05	0.000190714
ENSG00000100234.13	ENST00000908983.1	2053.98	-1.0984	0.089389	-12.2879	1.05248e-34	9.72882e-34
ENSG00000100239.17	ENST00000473283.1	45.9239	-0.363768	0.385553	-0.943497	0.345427	0.439019
ENSG00000100241.23	ENST00000685239.1	192.151	-1.65267	0.236079	-7.00048	2.5508e-12	9.81923e-12
ENSG00000100246.14	ENST00000964354.1	49.8045	-3.16549	0.51735	-6.11866	9.43648e-10	3.15026e-09
ENSG00000100249.5	ENST00000216071.5	3.18544	0.26279	2.59135	0.101411	0.919224	0.94985
ENSG00000100258.19	ENST00000505981.5	200.577	-1.23678	0.233551	-5.29556	1.18654e-07	3.42445e-07
ENSG00000100263.15	ENST00000406335.1	115.878	-0.420251	0.355427	-1.18238	0.237053	0.317195
ENSG00000100266.20	ENST00000445706.5	969.815	2.32924	0.106306	21.9107	2.05504e-106	9.40391e-105
ENSG00000100271.18	ENST00000903481.1	52.4551	0.167562	0.36418	0.460108	0.645439	0.731487
ENSG00000100276.11	ENST00000942941.1	9.62829	-1.04222	0.745318	-1.39835	0.162008	0.227141
ENSG00000100280.18	ENST00000482818.1	402.466	-2.22816	0.275784	-8.07935	6.51122e-16	3.02014e-15
ENSG00000100281.15	ENST00000455359.5	164.22	-0.906744	0.210751	-4.30244	1.68924e-05	4.10309e-05
ENSG00000100284.23	ENST00000497448.1	21.8856	-0.808451	0.555341	-1.45577	0.145455	0.206561
ENSG00000100285.10	ENST00000310624.7	41.5919	0.263431	2.09472	0.125759	0.899923	0.948885
ENSG00000100288.21	ENST00000465842.1	103.691	1.28709	0.234242	5.49472	3.91337e-08	1.16627e-07
ENSG00000100290.4	ENST00000956707.1	59.0381	0.648085	0.488629	1.32633	0.184729	0.254968
ENSG00000100292.18	ENST00000412893.5	33.275	-1.70651	0.634895	-2.68786	0.00719125	0.0130772
ENSG00000100294.14	ENST00000464244.1	36.4293	-2.17416	0.456699	-4.7606	1.93022e-06	5.09107e-06
ENSG00000100297.17	ENST00000416905.1	436.857	-0.72027	0.152023	-4.7379	2.15946e-06	5.67308e-06
ENSG00000100299.19	ENST00000551731.1	23.9143	0.727979	0.534403	1.36223	0.173125	0.240651
ENSG00000100300.19	ENST00000864342.1	83.6673	-2.37646	0.457984	-5.18895	2.11479e-07	5.99441e-07
ENSG00000100302.8	ENST00000885872.1	66.5704	-1.05985	0.697591	-1.5193	0.128688	0.185562
ENSG00000100304.13	ENST00000484711.1	656.707	-2.68671	0.214586	-12.5205	5.77035e-36	5.5315e-35
ENSG00000100307.14	ENST00000482294.1	139.876	-0.0113687	0.376358	-0.0302071	0.975902	0.980531
ENSG00000100311.18	ENST00000921092.1	431.917	0.0270586	0.517788	0.0522581	0.958323	0.970367
ENSG00000100312.11	ENST00000527761.1	2.70954	-0.746236	2.21355	-0.337122	0.736025	0.813813
ENSG00000100314.5	ENST00000952608.1	59.0666	0.0538448	0.643871	0.0836266	0.933353	0.954827
ENSG00000100316.17	ENST00000471290.1	2493.18	-3.64984	0.162658	-22.4387	1.65155e-111	8.14596e-110
ENSG00000100319.14	ENST00000890558.1	115.908	-0.746687	0.240778	-3.10114	0.00192774	0.00379176
ENSG00000100320.25	ENST00000463509.1	152.429	-0.196549	0.181436	-1.0833	0.278676	0.36482
ENSG00000100321.16	ENST00000489206.1	1161.49	0.294207	0.141473	2.07959	0.0375628	0.060689
ENSG00000100324.15	ENST00000473491.1	151.677	-0.18334	0.233901	-0.783837	0.433136	0.529785
ENSG00000100325.16	ENST00000477074.1	49.0211	-0.792085	0.321534	-2.46345	0.0137606	0.0239556
ENSG00000100330.17	ENST00000480776.1	19.7561	-0.35883	0.543497	-0.660225	0.509109	0.604384
ENSG00000100335.16	ENST00000962962.1	476.894	-2.3619	0.205545	-11.4909	1.4654e-30	1.17987e-29
ENSG00000100336.19	ENST00000480236.2	16.2631	0.26279	2.82078	0.0931622	0.925775	0.951747
ENSG00000100344.12	ENST00000406117.6	246.367	-0.195874	0.181288	-1.08046	0.279939	0.366245
ENSG00000100345.24	ENST00000690244.1	780.648	-2.73012	0.177098	-15.4159	1.28002e-53	2.0467e-52
ENSG00000100346.18	ENST00000407673.5	444.603	0.378221	0.594182	0.636541	0.524424	0.619478
ENSG00000100348.11	ENST00000930525.1	596.426	-1.27568	0.173515	-7.35194	1.95347e-13	7.9725e-13
ENSG00000100350.17	ENST00000423980.1	63.845	-2.01335	0.394416	-5.10464	3.31424e-07	9.25881e-07
ENSG00000100351.18	ENST00000460449.1	2.45281	0.262789	4.16313	0.0631228	0.949669	0.964658
ENSG00000100353.19	ENST00000462794.1	144.341	-1.07972	0.192666	-5.60409	2.09353e-08	6.36436e-08
ENSG00000100360.16	ENST00000476548.1	57.2731	-0.99908	0.394048	-2.53543	0.011231	0.0198539
ENSG00000100364.20	ENST00000483374.1	276.204	-3.1393	0.254251	-12.3472	5.04121e-35	4.69875e-34
ENSG00000100372.16	ENST00000434185.1	900.666	1.03074	0.127563	8.08022	6.46482e-16	2.99979e-15
ENSG00000100373.11	ENST00000396082.2	11.9831	1.70538	2.19742	0.776083	0.4377	0.534231
ENSG00000100376.13	ENST00000476478.1	88.5711	0.508313	0.244672	2.07753	0.037753	0.0609722
ENSG00000100379.19	ENST00000462640.1	57.9935	-0.507633	0.347332	-1.46152	0.143872	0.204614
ENSG00000100380.16	ENST00000495652.1	292.295	-3.26434	0.222941	-14.6422	1.51138e-48	2.10957e-47
ENSG00000100385.16	ENST00000698896.1	15.9796	-1.61111	1.10514	-1.45784	0.144885	0.205838
ENSG00000100387.10	ENST00000476110.1	718.266	-0.32996	0.175279	-1.88248	0.0597702	0.0929328
ENSG00000100393.17	ENST00000634422.1	285.247	-1.31206	0.249843	-5.25155	1.50828e-07	4.32184e-07
ENSG00000100395.16	ENST00000969170.1	647.529	-0.00310455	0.158644	-0.0195693	0.984387	0.987712
ENSG00000100399.17	ENST00000892871.1	147.19	3.26257	1.10026	2.96526	0.00302426	0.0057967
ENSG00000100401.22	ENST00000422838.1	331.73	1.27432	0.171222	7.44254	9.87688e-14	4.09543e-13
ENSG00000100403.13	ENST00000897618.1	1884.48	-0.478442	0.149841	-3.193	0.00140801	0.00281737
ENSG00000100410.9	ENST00000899733.1	299.942	-1.36721	0.193232	-7.07551	1.48905e-12	5.80877e-12
ENSG00000100412.18	ENST00000676883.1	360.047	-2.37895	0.195816	-12.1489	5.81146e-34	5.25294e-33
ENSG00000100413.18	ENST00000355209.9	1018.84	-0.566354	0.188606	-3.00284	0.00267473	0.00515938
ENSG00000100417.13	ENST00000463617.5	65.9037	0.206979	0.383068	0.540318	0.588978	0.680045
ENSG00000100418.9	ENST00000463886.1	188.793	-0.421114	0.226137	-1.86221	0.0625739	0.0968679
ENSG00000100422.15	ENST00000471929.1	101.936	-1.30933	0.284259	-4.60614	4.10219e-06	1.05192e-05
ENSG00000100425.21	ENST00000479985.1	35.2663	-0.619003	0.404013	-1.53214	0.125489	0.181693
ENSG00000100426.9	ENST00000921492.1	1002.1	-0.257948	0.121917	-2.11577	0.0343644	0.0558653
ENSG00000100427.17	ENST00000483836.1	5.68386	0.26279	2.43307	0.108008	0.913989	0.94922
ENSG00000100433.17	ENST00000312350.9	8.49466	0.504755	1.09853	0.459482	0.645888	0.731932
ENSG00000100439.12	ENST00000489928.1	31.0807	-2.54849	0.583476	-4.36777	1.25522e-05	3.08445e-05
ENSG00000100441.11	ENST00000556255.1	109.783	-1.85015	0.235722	-7.84886	4.19831e-15	1.87233e-14
ENSG00000100442.12	ENST00000904115.1	685.264	-0.794652	0.152865	-5.19839	2.01017e-07	5.71087e-07
ENSG00000100445.19	ENST00000555561.5	114.907	-1.82154	0.314456	-5.79267	6.92763e-09	2.17461e-08
ENSG00000100461.19	ENST00000556838.5	328.323	-2.15687	0.193979	-11.1191	1.01322e-28	7.68193e-28
ENSG00000100462.17	ENST00000557015.1	263.126	-2.76847	0.21702	-12.7568	2.85835e-37	2.85562e-36
ENSG00000100473.19	ENST00000553833.5	158.156	-0.867168	0.202638	-4.27938	1.87411e-05	4.53841e-05
ENSG00000100478.18	ENST00000216366.9	57.4819	1.42951	0.337194	4.23944	2.24083e-05	5.39023e-05
ENSG00000100479.15	ENST00000553850.1	27.1964	-0.528242	0.501408	-1.05352	0.292104	0.379869
[truncated: 16,169 more rows]

## Sheet: Ctrl_hiAPGC-vs-Conv-Exon
Gene ID	Transcript ID	baseMean	log2FoldChange	lfcSE	stat	pvalue	padj
ENSG00000000003.17	ENST00000966005.1	391.94	-0.329876	0.151508	-2.17728	0.0294599	0.0839443
ENSG00000000419.15	ENST00000684628.1	257.397	-0.219155	0.210207	-1.04257	0.297149	0.472084
ENSG00000000457.15	ENST00000367771.11	264.22	-0.275647	0.221159	-1.24637	0.212627	0.373393
ENSG00000000460.18	ENST00000496973.5	211.954	-0.120891	0.193323	-0.625332	0.531753	0.692698
ENSG00000000938.14	ENST00000475472.5	9.00656	0.0696843	2.23582	0.0311672	0.975136
ENSG00000001036.15	ENST00000367585.1	154.059	-0.314663	0.252171	-1.24781	0.212099	0.372752
ENSG00000001167.16	ENST00000914467.1	576.691	-0.265405	0.119862	-2.21425	0.0268118	0.0777942
ENSG00000001460.19	ENST00000483261.1	12.4745	-0.284473	0.668222	-0.425717	0.670314
ENSG00000001461.20	ENST00000488155.1	51.0319	-0.178611	0.364888	-0.489495	0.624492	0.766033
ENSG00000001497.19	ENST00000469091.1	116.157	0.518395	0.234652	2.20921	0.02716	0.0785901
ENSG00000001561.8	ENST00000962954.1	161.718	-0.551788	0.247654	-2.22806	0.0258764	0.075655
ENSG00000001617.13	ENST00000420831.1	157.142	-0.110135	0.420383	-0.261987	0.793331	0.885147
ENSG00000001626.19	ENST00000436097.2	14.164	0.0696665	2.18612	0.0318677	0.974578
ENSG00000001629.11	ENST00000486698.1	8.72741	1.26045	0.801795	1.57204	0.115941
ENSG00000001630.19	ENST00000482924.1	196.927	-0.386062	0.188404	-2.04912	0.0404501	0.108091
ENSG00000001631.18	ENST00000466166.1	91.5347	0.0573573	0.354509	0.161793	0.871468	0.935534
ENSG00000002016.19	ENST00000542297.1	15.8825	0.275401	0.618637	0.445174	0.656194
ENSG00000002330.15	ENST00000493798.1	30.9324	-0.601756	0.453491	-1.32694	0.184528	0.337885
ENSG00000002549.14	ENST00000508014.5	82.8031	-0.519188	0.278944	-1.86126	0.0627072	0.152268
ENSG00000002587.11	ENST00000952065.1	2.13172	-1.39015	2.69488	-0.515851	0.605959
ENSG00000002745.13	ENST00000361301.6	149.946	-0.483934	0.52596	-0.920098	0.357522	0.535123
ENSG00000002746.16	ENST00000493057.1	10.906	0.340776	0.701643	0.485682	0.627193
ENSG00000002834.20	ENST00000433206.6	915.403	-0.57864	0.14495	-3.992	6.55191e-05	0.00046841
ENSG00000002919.16	ENST00000577310.1	13.4646	0.520085	0.64392	0.807685	0.419272
ENSG00000003056.9	ENST00000544193.1	193.478	-0.359228	0.176014	-2.04091	0.0412598	0.109809
ENSG00000003096.16	ENST00000881391.1	2361.57	1.52553	0.123604	12.3421	5.37597e-35	7.84998e-33
ENSG00000003137.9	ENST00000412253.1	51.5121	-0.730182	0.427234	-1.70909	0.0874343	0.195931
ENSG00000003147.20	ENST00000476942.1	0.585318	3.81051	3.65312	1.04308	0.29691
ENSG00000003249.16	ENST00000623401.1	271.711	-0.772275	0.19241	-4.01369	5.97758e-05	0.00043131
ENSG00000003393.17	ENST00000679503.1	203.229	-0.0115781	0.220781	-0.0524415	0.958177	0.986491
ENSG00000003400.17	ENST00000484926.1	3.21583	0.621011	1.22687	0.506174	0.612735
ENSG00000003402.22	ENST00000490965.1	3.4739	0.455107	1.16557	0.390457	0.696199
ENSG00000003436.17	ENST00000971372.1	138.41	-0.24491	0.225278	-1.08714	0.276973	0.449899
ENSG00000003509.17	ENST00000474257.5	88.1955	-0.0822978	0.325254	-0.253027	0.800248	0.889918
ENSG00000003987.15	ENST00000518272.5	11.7178	0.194593	0.667662	0.291454	0.770704
ENSG00000003989.19	ENST00000398090.3	1087.06	-0.325129	0.130212	-2.49691	0.012528	0.0418368
ENSG00000004059.12	ENST00000864451.1	664.927	-0.599795	0.214034	-2.80233	0.00507352	0.0198766
ENSG00000004142.13	ENST00000902298.1	1419.09	-0.576637	0.143302	-4.02394	5.72333e-05	0.00041466
ENSG00000004399.14	ENST00000511018.1	46.2314	0.0200788	0.379188	0.052952	0.95777	0.986491
ENSG00000004455.19	ENST00000466029.1	870.22	-0.396659	0.146366	-2.71006	0.00672719	0.0251587
ENSG00000004468.14	ENST00000510674.1	39.3042	2.05174	1.63796	1.25261	0.210346	0.370535
ENSG00000004478.9	ENST00000539181.1	258.966	-0.513006	0.150125	-3.4172	0.000632694	0.00339404
ENSG00000004487.19	ENST00000602503.1	282.447	-0.556836	0.169766	-3.28002	0.00103799	0.00519024
ENSG00000004534.16	ENST00000478026.1	54.4679	0.0904502	0.322309	0.280632	0.778993	0.87548
ENSG00000004660.16	ENST00000158166.5	687.673	0.445371	0.186021	2.39419	0.016657	0.0528853
ENSG00000004700.17	ENST00000965024.1	592.458	-0.331021	0.134464	-2.46178	0.0138248	0.0453761
ENSG00000004766.18	ENST00000476413.1	33.2381	0.658885	0.427553	1.54106	0.123302	0.25313
ENSG00000004776.14	ENST00000592984.6	4.24711	-2.25022	1.86957	-1.2036	0.228743
ENSG00000004777.19	ENST00000586918.1	5.28611	2.88968	1.85626	1.55672	0.119537
ENSG00000004779.11	ENST00000882848.1	408.363	-0.102488	0.200558	-0.511013	0.609342	0.754115
ENSG00000004799.9	ENST00000473301.1	2.29409	1.17456	2.33067	0.503958	0.614291
ENSG00000004809.15	ENST00000460159.1	3.7472	0.0696722	2.48972	0.0279839	0.977675
ENSG00000004838.15	ENST00000475688.1	21.7518	0.470267	0.757498	0.620815	0.534721
ENSG00000004846.17	ENST00000441315.1	1.79425	-3.95871	2.29489	-1.72501	0.0845263
ENSG00000004864.15	ENST00000494085.1	133.387	-0.414332	0.225966	-1.8336	0.0667137	0.159403
ENSG00000004866.23	ENST00000464020.1	62.2519	-0.49723	0.3494	-1.4231	0.154708	0.298815
ENSG00000004897.13	ENST00000576484.1	592.676	-0.283524	0.258512	-1.09676	0.272748	0.445013
ENSG00000004939.16	ENST00000498270.1	90.837	-1.37193	2.04356	-0.671342	0.502003	0.668083
ENSG00000004948.17	ENST00000887175.1	18.6652	0.425229	0.697918	0.609282	0.542337
ENSG00000004961.16	ENST00000911475.1	248.366	-0.57559	0.174699	-3.29476	0.000985061	0.0049701
ENSG00000005001.11	ENST00000574768.5	3.96716	0.0696713	2.77463	0.0251101	0.979967
ENSG00000005007.15	ENST00000594243.1	83.0734	-0.539991	0.302858	-1.78298	0.0745889	0.173433
ENSG00000005020.14	ENST00000490456.6	832.939	1.29403	0.156146	8.28729	1.15863e-16	4.76509e-15
ENSG00000005022.7	ENST00000463551.1	743.731	-0.600489	0.121211	-4.95406	7.26811e-07	8.00303e-06
ENSG00000005059.17	ENST00000494604.1	65.065	-0.49732	0.304788	-1.63169	0.102745	0.221108
ENSG00000005073.6	ENST00000517402.1	187.056	-0.598775	0.193032	-3.10194	0.00192258	0.00878147
ENSG00000005100.13	ENST00000225296.8	1712	-0.162632	0.0752457	-2.16135	0.0306683	0.0867368
ENSG00000005102.15	ENST00000318579.9	29.3891	-0.848994	0.609041	-1.39398	0.163323	0.31025
ENSG00000005108.17	ENST00000408005.2	5.49118	0.0646381	1.23502	0.0523378	0.958259
ENSG00000005156.13	ENST00000585370.1	65.9823	-0.3583	0.286578	-1.25027	0.211201	0.371595
ENSG00000005175.11	ENST00000548296.1	88.7347	-0.334118	0.346422	-0.964482	0.334804	0.512285
ENSG00000005187.13	ENST00000563914.1	6.41602	-0.524114	0.950227	-0.551567	0.581245
ENSG00000005189.21	ENST00000563045.1	10.0229	-0.366465	0.708937	-0.516923	0.60521
ENSG00000005194.16	ENST00000564885.1	33.6209	0.0833967	0.454408	0.183528	0.854383	0.924366
ENSG00000005206.18	ENST00000587851.1	311.734	0.749789	0.211133	3.55127	0.000383382	0.00219947
ENSG00000005238.21	ENST00000903802.1	17.1621	-0.2024	0.708724	-0.285584	0.775197
ENSG00000005243.11	ENST00000580409.5	5.60816	1.08705	1.55197	0.700434	0.483656
ENSG00000005249.15	ENST00000706593.1	111.421	-0.365435	0.274996	-1.32888	0.183889	0.337091
ENSG00000005302.19	ENST00000494268.1	73.4546	-0.445529	0.316644	-1.40704	0.159417	0.305294
ENSG00000005339.15	ENST00000575237.2	209.146	-0.719592	0.223052	-3.22612	0.00125481	0.00609303
ENSG00000005436.15	ENST00000470503.1	215.886	-0.0680941	0.208549	-0.326514	0.744036	0.851918
ENSG00000005448.18	ENST00000482605.1	52.2532	-0.0425291	0.383169	-0.110993	0.911622	0.960074
ENSG00000005469.13	ENST00000469785.1	3.18278	-1.00551	1.39184	-0.722431	0.470029
ENSG00000005471.20	ENST00000467983.1	2.07568	0.0950978	2.5538	0.0372378	0.970295
ENSG00000005483.23	ENST00000496191.1	69.3107	-0.202508	0.354059	-0.571962	0.567348	0.721002
ENSG00000005486.18	ENST00000428119.1	230.786	-0.540968	0.232504	-2.3267	0.0199812	0.0613013
ENSG00000005513.11	ENST00000711628.1	104.598	-0.524535	0.370958	-1.414	0.157362	0.302532
ENSG00000005700.16	ENST00000508381.1	112.391	-0.46034	0.262128	-1.75617	0.07906	0.181462
ENSG00000005801.19	ENST00000529789.5	272.717	0.38329	0.166799	2.29792	0.0215665	0.0652391
ENSG00000005810.21	ENST00000485061.2	328.319	-0.258845	0.183963	-1.40705	0.159412	0.305287
ENSG00000005812.12	ENST00000885164.1	1462.09	-0.27278	0.149432	-1.82545	0.0679338	0.161452
ENSG00000005844.20	ENST00000564632.1	29.3633	-2.37716	1.8196	-1.30642	0.191411	0.346895
ENSG00000005882.13	ENST00000506242.5	87.7021	-0.755146	0.264543	-2.85453	0.0043101	0.017311
ENSG00000005884.19	ENST00000514834.1	20.1164	-0.137238	0.636778	-0.21552	0.829362
ENSG00000005889.17	ENST00000480195.1	713.533	0.816938	0.126192	6.47378	9.55799e-11	2.01345e-09
ENSG00000005893.18	ENST00000486593.5	637.979	-0.224419	0.155281	-1.44524	0.14839	0.289814
ENSG00000005961.20	ENST00000592944.1	38.8067	1.28109	0.803052	1.59527	0.110651	0.233708
ENSG00000006007.13	ENST00000563645.1	235.51	-0.620506	0.17049	-3.63954	0.00027313	0.00163905
ENSG00000006015.19	ENST00000595490.1	84.157	0.200975	0.283726	0.708343	0.478732	0.648134
ENSG00000006016.13	ENST00000596360.1	4.13631	-0.86821	1.13375	-0.765785	0.443804
ENSG00000006025.14	ENST00000578461.1	7.09192	1.03422	1.17271	0.881908	0.377826
ENSG00000006042.13	ENST00000583437.2	91.3414	-0.111254	0.335593	-0.331517	0.740254	0.849364
ENSG00000006062.19	ENST00000586644.2	82.5665	-0.299629	0.280439	-1.06843	0.285328	0.458964
ENSG00000006071.16	ENST00000526037.6	2.64046	-2.50182	2.02237	-1.23707	0.21606
ENSG00000006116.5	ENST00000876789.1	24.2477	1.50299	2.07257	0.72518	0.468341
ENSG00000006125.19	ENST00000938755.1	4149.74	-0.0964734	0.0874155	-1.10362	0.269759	0.441724
ENSG00000006128.13	ENST00000495916.1	1.69903	-2.41636	2.76955	-0.872475	0.382949
ENSG00000006194.12	ENST00000219069.6	301.574	-0.480583	0.161008	-2.98485	0.00283721	0.0121999
ENSG00000006210.7	ENST00000565912.1	7.38304	0.0832798	2.15843	0.0385835	0.969222
ENSG00000006283.18	ENST00000506520.1	27.3701	-0.214045	0.702148	-0.304843	0.760486	0.862896
ENSG00000006327.15	ENST00000574699.1	10.407	-0.131941	0.735721	-0.179336	0.857674
ENSG00000006377.11	ENST00000518156.3	48.5521	-0.294177	0.363055	-0.810282	0.417778	0.595385
ENSG00000006432.17	ENST00000933971.1	404.299	-0.0516615	0.130762	-0.395078	0.692785	0.817015
ENSG00000006451.9	ENST00000436179.1	594.913	0.647852	0.128896	5.02616	5.004e-07	5.69052e-06
ENSG00000006453.15	ENST00000480580.1	94.9356	0.124415	0.384917	0.323226	0.746524	0.853599
ENSG00000006459.12	ENST00000478996.1	62.9035	-0.358813	0.343841	-1.04354	0.296696	0.471628
ENSG00000006468.16	ENST00000433547.1	1.38369	-0.511506	1.84645	-0.277021	0.781764
ENSG00000006530.19	ENST00000494053.1	152.159	-0.147381	0.190576	-0.773344	0.439319	0.615935
ENSG00000006534.18	ENST00000616697.1	8.31638	-0.358607	1.39669	-0.256754	0.797369
ENSG00000006576.18	ENST00000470215.1	247.512	0.201916	0.265519	0.760458	0.446981	0.622862
ENSG00000006606.9	ENST00000394905.2	3.98033	0.083296	2.31444	0.0359896	0.971291
ENSG00000006607.15	ENST00000413432.2	858.963	-0.229243	0.106246	-2.15766	0.0309543	0.0873668
ENSG00000006611.18	ENST00000624811.1	5.93067	-0.714322	0.989669	-0.721779	0.470431
ENSG00000006625.19	ENST00000426081.5	156.595	-0.27628	0.223494	-1.23618	0.216391	0.378191
ENSG00000006634.9	ENST00000495067.1	104.737	-0.408269	0.243757	-1.6749	0.093954	0.206767
ENSG00000006638.14	ENST00000589966.1	36.8442	-1.21894	0.533292	-2.28569	0.0222723	0.0669646
ENSG00000006652.15	ENST00000417662.1	59.2699	-0.0744127	0.43416	-0.171395	0.863913	0.930305
ENSG00000006695.13	ENST00000429152.6	97.5515	-0.579638	0.238489	-2.43046	0.0150798	0.0487655
ENSG00000006704.12	ENST00000486086.1	49.9862	-0.759991	0.410942	-1.84939	0.064402	0.155334
ENSG00000006712.16	ENST00000598127.1	392.315	-0.584147	0.218773	-2.6701	0.00758288	0.0278021
ENSG00000006715.17	ENST00000490924.1	31.69	-0.680522	0.463997	-1.46665	0.142471	0.281296
ENSG00000006740.19	ENST00000581437.1	67.9905	0.00419327	0.342533	0.012242	0.990233	0.994688
ENSG00000006744.20	ENST00000476042.1	362.863	-0.240014	0.146187	-1.64183	0.100625	0.217763
ENSG00000006747.16	ENST00000476649.1	1.77735	-1.58806	2.19735	-0.722714	0.469856
ENSG00000006757.13	ENST00000889418.1	96.298	-0.460467	0.233989	-1.9679	0.0490793	0.125705
ENSG00000006831.11	ENST00000537190.1	61.8223	-0.656785	0.305472	-2.15006	0.0315501	0.0887242
ENSG00000006837.12	ENST00000522501.1	254.027	0.723909	0.162482	4.45532	8.37697e-06	7.33985e-05
ENSG00000007001.15	ENST00000715224.1	5.91404	0.0452701	1.77424	0.0255152	0.979644
ENSG00000007038.12	ENST00000577043.1	36.7043	1.50413	2.05451	0.732113	0.4641	0.635801
ENSG00000007062.13	ENST00000511270.1	0.832199	-1.3577	3.45311	-0.393181	0.694186
ENSG00000007080.12	ENST00000597436.5	373.681	-0.539118	0.243068	-2.21797	0.0265569	0.0772156
ENSG00000007129.19	ENST00000967641.1	2.80475	0.0696664	2.59102	0.0268877	0.978549
ENSG00000007168.16	ENST00000610190.2	1166.44	-0.333074	0.0992533	-3.35579	0.000791375	0.00412575
ENSG00000007171.20	ENST00000697340.1	23.7114	-0.377435	0.55735	-0.677196	0.498282
ENSG00000007202.17	ENST00000577261.1	751.136	-0.398248	0.119486	-3.333	0.000859163	0.00443052
ENSG00000007216.17	ENST00000541739.6	10.0823	0.06968	2.1902	0.0318145	0.97462
ENSG00000007237.20	ENST00000580865.5	44.6774	-0.562493	0.453995	-1.23898	0.215352	0.376827
ENSG00000007255.11	ENST00000587818.1	44.4767	0.444803	0.44265	1.00486	0.314962	0.492055
ENSG00000007264.16	ENST00000588983.5	226.199	0.223199	0.304297	0.733492	0.463258	0.635305
ENSG00000007306.16	ENST00000599715.1	145.139	0.0696582	2.05795	0.0338484	0.972998	0.986491
ENSG00000007312.15	ENST00000559358.1	8.62844	-1.36733	2.24915	-0.607929	0.543234
ENSG00000007314.12	ENST00000584310.1	6.26163	-2.34416	2.2131	-1.05922	0.289501
ENSG00000007341.20	ENST00000498383.5	203.595	0.179491	0.175889	1.02048	0.307499	0.483767
ENSG00000007372.25	ENST00000532916.5	75.2204	-0.618416	0.353964	-1.74712	0.080617	0.184184
ENSG00000007376.9	ENST00000561734.5	184.809	-0.504651	0.310032	-1.62774	0.103581	0.222366
ENSG00000007384.16	ENST00000493647.1	69.5871	1.08859	0.607799	1.79103	0.0732879	0.171129
ENSG00000007392.18	ENST00000467552.1	131.939	0.521267	0.245077	2.12696	0.0334237	0.0929117
ENSG00000007402.13	ENST00000483620.1	55.493	-0.762888	0.390324	-1.9545	0.0506422	0.128843
ENSG00000007516.16	ENST00000561602.1	4.92762	1.9687	1.94476	1.01231	0.31139
ENSG00000007520.5	ENST00000566296.1	100.983	-0.538022	0.240311	-2.23885	0.0251654	0.0739572
ENSG00000007541.18	ENST00000537901.1	34.1193	0.33536	0.420811	0.796937	0.425487	0.602781
ENSG00000007545.17	ENST00000467286.1	48.4541	-0.0709541	0.378598	-0.187413	0.851337	0.922469
ENSG00000007908.16	ENST00000609271.1	35.6592	1.51075	2.04899	0.737314	0.460932	0.634175
ENSG00000007923.18	ENST00000689169.1	426.856	-0.367756	0.185161	-1.98614	0.0470178	0.121465
ENSG00000007933.14	ENST00000534514.1	4.106	0.0696547	2.6011	0.0267789	0.978636
ENSG00000007944.16	ENST00000356840.8	742.592	-0.167636	0.148515	-1.12874	0.259006	0.42929
ENSG00000007968.8	ENST00000487237.1	88.0005	-0.38354	0.291101	-1.31755	0.187656	0.341863
ENSG00000008018.10	ENST00000920418.1	1508.73	-0.324277	0.117676	-2.75568	0.00585708	0.0223839
ENSG00000008056.15	ENST00000640721.1	24.2171	0.0696589	2.11963	0.0328637	0.973783
ENSG00000008083.15	ENST00000930276.1	2625.16	0.659338	0.0733353	8.99073	2.45593e-19	1.3007e-17
ENSG00000008086.13	ENST00000624953.1	198.171	2.11263	0.239162	8.83347	1.01478e-18	5.12915e-17
ENSG00000008128.24	ENST00000495016.5	28.0157	0.174549	0.471399	0.370278	0.711176	0.829455
ENSG00000008130.16	ENST00000497747.5	60.8565	-0.332026	0.361123	-0.919425	0.357873	0.535509
ENSG00000008226.21	ENST00000478428.1	6.90715	-0.867645	1.55126	-0.559316	0.575946
ENSG00000008256.18	ENST00000466543.1	28.3084	-0.41874	0.404661	-1.03479	0.300766	0.476152
ENSG00000008277.16	ENST00000476330.1	32.0209	0.0779726	0.391724	0.19905	0.842224	0.917625
ENSG00000008282.11	ENST00000460770.1	159.046	-0.608124	0.208854	-2.91172	0.00359444	0.0148768
ENSG00000008283.17	ENST00000585153.1	10.3468	-0.988995	0.918806	-1.07639	0.281752
ENSG00000008294.23	ENST00000509724.1	228.473	-0.266951	0.208313	-1.28149	0.200022	0.357617
ENSG00000008300.17	ENST00000164024.5	1239.1	0.31499	0.165821	1.89958	0.0574884	0.142413
ENSG00000008311.17	ENST00000679659.1	500.68	-0.356745	0.20759	-1.71851	0.0857039	0.193034
ENSG00000008323.17	ENST00000536531.5	2.8266	1.47598	2.95336	0.499763	0.617242
ENSG00000008324.13	ENST00000897957.1	68.5821	-0.302616	0.315499	-0.959165	0.337475	0.515023
ENSG00000008382.17	ENST00000601877.1	24.3993	-0.710877	0.557546	-1.27501	0.202305
ENSG00000008394.14	ENST00000624056.1	13.5965	-0.485764	0.682448	-0.711797	0.476591
ENSG00000008405.13	ENST00000546722.1	37.5882	-0.00714092	0.427584	-0.0167007	0.986675	0.992614
ENSG00000008441.19	ENST00000591028.1	82.7231	0.130154	0.358601	0.362951	0.716642	0.833349
ENSG00000008513.18	ENST00000522285.1	4.7732	-0.40042	1.00741	-0.397473	0.691019
ENSG00000008516.20	ENST00000612971.2	87.2015	0.954192	0.533982	1.78694	0.0739479	0.172288
ENSG00000008517.20	ENST00000525003.1	22.4304	-0.245948	0.543296	-0.452696	0.650768
ENSG00000008710.20	ENST00000568796.1	67.0884	0.407662	0.412585	0.988067	0.32312	0.500621
ENSG00000008735.15	ENST00000952232.1	233.962	-0.302596	0.267126	-1.13278	0.257305	0.427245
ENSG00000008838.22	ENST00000492176.2	269.76	-0.402787	0.192485	-2.09257	0.0363876	0.0993713
ENSG00000008853.19	ENST00000523918.1	21.0573	-0.430233	0.565417	-0.760912	0.44671
ENSG00000008869.13	ENST00000471051.1	113.497	-0.272142	0.240448	-1.13181	0.257713	0.427723
ENSG00000008952.18	ENST00000469890.1	39.2122	-0.119036	0.41998	-0.283432	0.776846	0.874162
ENSG00000008988.12	ENST00000519369.1	1866.61	-0.596712	0.167629	-3.55971	0.00037127	0.00213824
ENSG00000009307.18	ENST00000483407.1	1245.08	-0.56749	0.133306	-4.25706	2.07134e-05	0.000166383
ENSG00000009335.20	ENST00000469336.1	409.678	0.623432	0.198162	3.14607	0.00165483	0.00771215
ENSG00000009413.17	ENST00000470871.1	115.7	0.290359	0.258089	1.12504	0.260574	0.431023
ENSG00000009694.14	ENST00000422452.4	1858.22	1.07217	0.144765	7.40626	1.29913e-13	3.85448e-12
ENSG00000009709.14	ENST00000713642.1	4.2792	1.69491	1.15281	1.47024	0.141497
ENSG00000009724.19	ENST00000480221.1	36.5291	0.905064	0.801624	1.12904	0.258882	0.429133
ENSG00000009765.16	ENST00000229447.9	20.7298	0.0620098	2.07988	0.0298141	0.976215
ENSG00000009780.17	ENST00000446647.1	61.9905	0.246245	0.358496	0.686882	0.492157	0.659806
ENSG00000009830.14	ENST00000683721.1	38.3855	-0.12529	0.414117	-0.302548	0.762235	0.864081
ENSG00000009844.17	ENST00000890564.1	1098.1	-0.164083	0.129743	-1.26467	0.205989	0.365303
ENSG00000009950.17	ENST00000467221.1	18.0896	-0.108568	0.620957	-0.174839	0.861206
ENSG00000009954.11	ENST00000466844.1	230.958	0.0309443	0.262723	0.117783	0.90624	0.956908
ENSG00000010017.14	ENST00000469916.1	133.791	-0.256002	0.208932	-1.22529	0.220466	0.383061
ENSG00000010030.14	ENST00000339796.9	161.559	-1.0251	0.485111	-2.11313	0.0345897	0.0954111
ENSG00000010072.17	ENST00000492437.1	120.171	-0.490083	0.254633	-1.92466	0.0542713	0.136051
ENSG00000010165.21	ENST00000485629.1	143.675	-0.30071	0.23855	-1.26058	0.207462	0.367227
ENSG00000010219.14	ENST00000544050.1	49.1378	-0.275068	0.348948	-0.788279	0.430533	0.607745
ENSG00000010244.20	ENST00000582705.1	1239.75	-0.403959	0.156974	-2.57341	0.0100701	0.0351261
ENSG00000010256.13	ENST00000480561.5	268.696	-0.440477	0.204998	-2.14869	0.0316593	0.088973
ENSG00000010270.15	ENST00000972201.1	368.233	-0.0999001	0.154423	-0.646925	0.517681	0.680427
ENSG00000010278.16	ENST00000676638.1	79.5481	-1.01731	0.307099	-3.31263	0.000924224	0.00471183
ENSG00000010282.16	ENST00000480939.1	1.05314	0.0696059	3.99485	0.0174239	0.986098
ENSG00000010292.14	ENST00000536090.1	294.961	-0.535755	0.164922	-3.24854	0.00116	0.00569313
ENSG00000010310.10	ENST00000591322.1	5.39742	-3.35817	1.8767	-1.78941	0.0735491
ENSG00000010318.23	ENST00000473145.5	51.8013	0.166653	0.368767	0.45192	0.651327	0.785859
ENSG00000010319.8	ENST00000475739.1	12.5063	1.55288	0.956332	1.62379	0.104421
ENSG00000010322.17	ENST00000467594.1	96.1664	-0.0680971	0.26003	-0.261882	0.793413	0.885212
ENSG00000010327.11	ENST00000469989.1	4.64455	-0.930167	2.18826	-0.425072	0.670784
ENSG00000010361.15	ENST00000534138.1	42.663	-0.566831	0.409829	-1.38309	0.166637	0.314457
ENSG00000010379.17	ENST00000534887.1	13.5046	2.46461	1.95418	1.2612	0.207236
ENSG00000010404.19	ENST00000428056.6	103.085	-0.550816	0.276701	-1.99066	0.0465186	0.120471
ENSG00000010539.13	ENST00000575630.1	55.2303	-0.517289	0.4086	-1.266	0.205512	0.364668
ENSG00000010610.11	ENST00000539492.1	48.5132	0.0696683	2.06997	0.0336566	0.973151	0.986491
ENSG00000010626.16	ENST00000486401.1	141.56	0.126484	0.464519	0.27229	0.785399	0.880029
ENSG00000010671.19	ENST00000695632.1	119.526	-0.941876	1.27094	-0.741089	0.45864	0.632724
ENSG00000010803.19	ENST00000488592.1	664.763	1.11377	0.144191	7.7243	1.12474e-14	3.72275e-13
ENSG00000010810.19	ENST00000495935.1	232.198	-0.245405	0.161826	-1.51648	0.129398	0.262091
ENSG00000010818.12	ENST00000703920.1	1674.41	0.678293	0.135161	5.0184	5.21023e-07	5.89904e-06
ENSG00000011007.14	ENST00000609199.2	1961.46	-0.284073	0.0774164	-3.66942	0.000243097	0.00148284
ENSG00000011009.13	ENST00000472213.1	181.065	-0.492021	0.26825	-1.83419	0.0666255	0.159259
ENSG00000011021.24	ENST00000494028.1	57.9606	0.850652	0.336855	2.52527	0.0115608	0.0392516
ENSG00000011028.14	ENST00000580916.1	42.0774	0.119715	0.537813	0.222596	0.82385	0.905415
ENSG00000011083.9	ENST00000524041.1	3.82303	0.0696687	2.75496	0.0252884	0.979825
ENSG00000011105.15	ENST00000539631.1	46.7878	0.625513	0.487896	1.28206	0.199821	0.357379
ENSG00000011114.16	ENST00000555525.1	226.676	0.0238249	0.208528	0.114252	0.909038	0.958517
ENSG00000011132.13	ENST00000586991.1	47.1279	0.193816	0.521616	0.371568	0.710214	0.82868
ENSG00000011143.20	ENST00000583577.1	23.5177	-0.329609	0.484881	-0.679773	0.496648
ENSG00000011198.11	ENST00000463153.2	619.374	-0.0437679	0.151869	-0.288195	0.773197	0.871635
ENSG00000011201.13	ENST00000481896.1	25.21	-0.815109	0.476722	-1.70982	0.0872991
ENSG00000011258.17	ENST00000586898.1	100.847	0.0776695	0.351916	0.220705	0.825322	0.906414
ENSG00000011260.15	ENST00000582150.1	60.5729	-0.142101	0.350848	-0.405022	0.685461	0.811668
ENSG00000011275.19	ENST00000479541.1	128.631	0.538368	0.207133	2.59914	0.00934566	0.0330547
ENSG00000011295.17	ENST00000583704.1	120.805	-0.613849	0.211824	-2.89793	0.00375639	0.015433
ENSG00000011304.23	ENST00000592113.5	2148.18	-0.632142	0.120053	-5.26551	1.39797e-07	1.77914e-06
ENSG00000011332.23	ENST00000488378.1	20.904	0.114703	0.463201	0.247631	0.80442
ENSG00000011347.11	ENST00000540831.1	14.291	-0.0558769	0.599231	-0.0932478	0.925707
ENSG00000011376.13	ENST00000474585.1	82.0076	-0.253955	0.307092	-0.826966	0.408256	0.58589
ENSG00000011405.15	ENST00000265970.11	1685.41	0.0812713	0.189514	0.428842	0.668038	0.798707
ENSG00000011422.13	ENST00000593447.5	35.4366	0.0925621	0.440673	0.210047	0.833631	0.911899
ENSG00000011426.12	ENST00000429082.1	531.521	-0.483024	0.222222	-2.17361	0.0297342	0.0845664
ENSG00000011451.22	ENST00000600632.1	173.438	-0.52023	0.251696	-2.0669	0.038744	0.104419
ENSG00000011454.19	ENST00000474707.1	77.2286	-0.126252	0.311276	-0.405595	0.68504	0.81132
ENSG00000011465.19	ENST00000548218.1	2.14987	0.0694859	4.91442	0.0141392	0.988719
ENSG00000011478.13	ENST00000591606.1	108.995	0.345426	0.270379	1.27756	0.201403	0.359422
ENSG00000011485.16	ENST00000467902.2	208.663	-0.330049	0.190438	-1.73311	0.0830768	0.188469
ENSG00000011523.16	ENST00000497039.1	107.285	-0.495994	0.272994	-1.81687	0.0692371	0.163754
ENSG00000011566.16	ENST00000475457.1	65.3018	0.659888	0.30842	2.13957	0.0323894	0.0905623
ENSG00000011590.15	ENST00000890381.1	5.49628	0.0696822	2.44061	0.0285512	0.977223
ENSG00000011638.12	ENST00000573688.1	37.3241	-0.335378	0.405875	-0.826309	0.408629	0.586235
ENSG00000012048.27	ENST00000700082.1	178.474	-0.229218	0.201515	-1.13747	0.255341	0.424985
ENSG00000012061.18	ENST00000592410.5	43.4144	-0.217092	0.393743	-0.551355	0.58139	0.73198
ENSG00000012171.21	ENST00000439487.5	45.406	-0.25692	1.05059	-0.244548	0.806806	0.893991
ENSG00000012174.13	ENST00000860793.1	816.451	-0.144555	0.126321	-1.14435	0.252478	0.421673
ENSG00000012223.14	ENST00000462667.1	13.242	0.0694541	4.69193	0.0148029	0.988189
ENSG00000012232.11	ENST00000523271.1	275.795	-0.597135	0.181375	-3.29228	0.0009938	0.0050045
ENSG00000012504.16	ENST00000188403.7	209.926	-0.522443	1.32664	-0.39381	0.693721	0.817686
ENSG00000012660.15	ENST00000893722.1	1028.68	-0.281449	0.114632	-2.45525	0.0140788	0.0460552
ENSG00000012779.13	ENST00000475300.1	0.883737	-1.5365	2.74574	-0.559593	0.575757
ENSG00000012822.17	ENST00000546443.5	201.264	-0.0909477	0.177965	-0.511044	0.60932	0.754099
ENSG00000012963.16	ENST00000940499.1	723.973	-0.360989	0.132169	-2.73126	0.00630921	0.0238311
ENSG00000012983.13	ENST00000557124.1	79.1319	0.548091	0.319729	1.71423	0.0864857	0.194403
ENSG00000013016.17	ENST00000322054.10	132.097	-0.486338	0.218267	-2.22818	0.0258687	0.0756397
ENSG00000013275.9	ENST00000601194.1	149.983	-0.494819	0.259666	-1.9056	0.0567021	0.140869
ENSG00000013288.10	ENST00000510427.1	11.8443	-0.0259216	0.620908	-0.041748	0.9667
ENSG00000013297.13	ENST00000477531.3	287.96	-0.942048	1.04126	-0.904715	0.365616	0.543122
ENSG00000013306.17	ENST00000592372.5	459.032	-0.327805	0.246906	-1.32765	0.184295	0.337573
ENSG00000013374.18	ENST00000497987.1	198.781	-0.0801679	0.172428	-0.464936	0.641977	0.778915
ENSG00000013375.18	ENST00000605602.1	7.12777	-0.0515327	0.803917	-0.0641021	0.948889
ENSG00000013392.9	ENST00000925505.1	37.9938	-0.397676	0.457874	-0.868527	0.385106	0.562805
ENSG00000013441.18	ENST00000461326.1	40.0219	-0.0569359	0.491331	-0.115881	0.907747	0.957817
ENSG00000013503.11	ENST00000970164.1	898.645	0.0870196	0.134968	0.644741	0.519095	0.681645
ENSG00000013523.13	ENST00000251089.8	548.228	-0.227556	0.140335	-1.62153	0.104905	0.224458
ENSG00000013561.19	ENST00000963023.1	318.956	-0.171383	0.150568	-1.13824	0.25502	0.424604
ENSG00000013563.15	ENST00000497242.1	25.8327	-0.69159	0.524368	-1.3189	0.187201
ENSG00000013573.18	ENST00000539702.1	266.944	0.176495	0.18895	0.934081	0.350262	0.528293
ENSG00000013583.11	ENST00000905178.1	147.38	-0.251927	0.202753	-1.24253	0.214041	0.375198
ENSG00000013588.11	ENST00000648791.1	118.205	-0.493995	0.250341	-1.97329	0.0484625	0.124439
ENSG00000013619.16	ENST00000464149.1	22.8195	-0.852159	0.675006	-1.26245	0.206788
ENSG00000013725.15	ENST00000538288.1	4.74976	0.0694104	6.12021	0.0113412	0.990951
ENSG00000013810.22	ENST00000484264.1	51.112	-0.491476	0.31069	-1.58189	0.113676	0.238577
ENSG00000014123.11	ENST00000461673.1	24.8636	-0.566818	0.480241	-1.18028	0.23789
ENSG00000014138.11	ENST00000706542.1	140.549	0.108684	0.202692	0.536201	0.591819	0.740508
ENSG00000014164.8	ENST00000528401.1	163	0.956665	0.33833	2.82761	0.00468972	0.0185878
ENSG00000014216.17	ENST00000527887.1	34.4599	0.0479911	0.452959	0.10595	0.915622	0.962361
ENSG00000014257.17	ENST00000507647.1	1.78375	2.51366	2.40505	1.04516	0.29595
ENSG00000014641.22	ENST00000495083.1	144.35	-0.547601	0.208999	-2.62012	0.00878984	0.031445
ENSG00000014824.15	ENST00000505523.1	388.628	-0.148474	0.176552	-0.840965	0.400367	0.577858
ENSG00000014919.14	ENST00000016171.6	712.474	-0.267288	0.107753	-2.48056	0.0131177	0.04346
ENSG00000015133.20	ENST00000555995.1	29.8778	-0.462275	0.484864	-0.953413	0.340381	0.518047
ENSG00000015153.16	ENST00000550315.1	46.4429	-0.477261	0.333826	-1.42967	0.152812	0.296065
ENSG00000015285.13	ENST00000483750.6	253.169	0.0595922	1.45604	0.0409277	0.967354	0.986491
ENSG00000015413.11	ENST00000261615.5	366.379	1.05978	1.7672	0.599696	0.548709	0.706158
ENSG00000015475.20	ENST00000494097.5	64.9052	-0.550997	0.278044	-1.98169	0.0475143	0.12247
ENSG00000015479.21	ENST00000511333.5	737.132	-0.49069	0.176844	-2.7747	0.00552525	0.0213463
ENSG00000015520.16	ENST00000423141.1	255.313	0.326142	0.88959	0.36662	0.713902	0.831394
ENSG00000015532.11	ENST00000571021.1	59.3369	-0.0673412	0.371679	-0.181181	0.856225	0.925605
ENSG00000015592.18	ENST00000519614.5	23.0464	0.890624	1.00099	0.889742	0.373605
ENSG00000015676.19	ENST00000480209.1	34.1257	-0.23784	0.446406	-0.532789	0.59418	0.742358
ENSG00000016082.16	ENST00000967706.1	66.7882	-0.65957	0.281967	-2.33918	0.0193263	0.0596769
ENSG00000016391.12	ENST00000959593.1	133.353	-0.225713	0.261207	-0.864115	0.387525	0.564949
ENSG00000016402.15	ENST00000460306.1	0.802319	0.142749	2.99021	0.0477389	0.961924
ENSG00000016864.20	ENST00000463762.1	43.1186	-0.468962	0.434989	-1.0781	0.280989	0.454273
ENSG00000017260.21	ENST00000507194.1	163.905	-0.217749	0.191087	-1.13953	0.254482	0.423974
ENSG00000017483.17	ENST00000429543.2	9.50786	1.70286	1.20611	1.41187	0.15799
ENSG00000017797.14	ENST00000943836.1	729.597	-0.202181	0.121146	-1.66891	0.0951354	0.208759
ENSG00000018189.14	ENST00000504805.6	595.501	0.117324	0.209991	0.558708	0.576361	0.728088
ENSG00000018236.16	ENST00000551424.5	182.718	1.70416	0.187358	9.09572	9.39588e-20	5.13534e-18
ENSG00000018510.19	ENST00000681565.1	2341.26	0.120835	0.131467	0.91913	0.358028	0.53567
ENSG00000018610.16	ENST00000644802.2	481.6	-0.13515	0.14968	-0.90293	0.366563	0.543891
ENSG00000018699.14	ENST00000448773.5	149.188	-0.182938	0.198358	-0.922261	0.356392	0.533959
ENSG00000018869.19	ENST00000301310.8	59.8761	-0.509993	0.326083	-1.56399	0.117819	0.244996
ENSG00000019144.21	ENST00000525226.5	79.5871	-0.432559	0.3106	-1.39266	0.163724	0.310708
ENSG00000019169.12	ENST00000958834.1	2.19062	0.0693815	6.12021	0.0113365	0.990955
ENSG00000019485.15	ENST00000622142.5	160.348	-0.220972	0.18573	-1.18975	0.234146	0.399678
ENSG00000019505.8	ENST00000528101.1	3.12371	0.0696671	3.08289	0.022598	0.981971
ENSG00000019549.13	ENST00000396822.6	155.623	-0.726241	0.231146	-3.14191	0.00167851	0.00780667
ENSG00000019582.18	ENST00000377795.7	57.4095	-2.25665	1.57022	-1.43715	0.150675	0.293036
ENSG00000019991.18	ENST00000453018.1	1.45519	-1.3953	2.94575	-0.473665	0.635739
ENSG00000019995.6	ENST00000471421.1	103.446	-0.133152	0.264667	-0.503092	0.6149	0.758259
ENSG00000020129.17	ENST00000459931.1	219.47	-0.489373	0.232144	-2.10806	0.035026	0.0964013
ENSG00000020181.19	ENST00000428068.5	1988.59	0.396362	0.143898	2.75446	0.00587889	0.0224572
ENSG00000020256.21	ENST00000371523.8	266.416	-0.0252333	0.150049	-0.168167	0.866452	0.932235
ENSG00000020426.12	ENST00000557134.1	1471.68	1.37248	0.168838	8.12899	4.32892e-16	1.63369e-14
ENSG00000020577.15	ENST00000673833.1	19.6665	-0.526104	0.618598	-0.850478	0.395059
ENSG00000020633.19	ENST00000479341.1	353.054	1.50654	2.01803	0.746539	0.455342	0.630733
ENSG00000020922.14	ENST00000535120.1	35.6298	-0.0903026	0.415446	-0.217363	0.827926	0.908226
ENSG00000021300.14	ENST00000544282.1	17.5584	-1.20883	0.668467	-1.80835	0.0705513
ENSG00000021355.14	ENST00000468511.5	42.7476	-0.0274242	0.349593	-0.0784461	0.937473	0.975547
ENSG00000021461.19	ENST00000631161.2	14.1489	0.0696764	2.14877	0.0324262	0.974132
ENSG00000021488.14	ENST00000879211.1	66.3944	1.8725	0.714733	2.61985	0.00879673	0.0314604
ENSG00000021574.16	ENST00000645550.1	29.8897	-0.280345	0.449213	-0.624079	0.532576	0.69332
ENSG00000021645.20	ENST00000556088.1	969.339	2.64484	1.11239	2.37762	0.0174246	0.0548571
ENSG00000021762.21	ENST00000477622.1	31.566	0.399165	0.476122	0.838367	0.401825	0.579195
ENSG00000021776.12	ENST00000559767.1	173.521	-0.362251	0.245531	-1.47537	0.140112	0.277901
ENSG00000021826.19	ENST00000479988.1	144.578	-0.410609	0.211753	-1.93909	0.05249	0.132575
ENSG00000021852.15	ENST00000875305.1	10.65	0.0696612	2.30892	0.0301705	0.975931
ENSG00000022267.20	ENST00000630677.1	306.9	-0.498324	0.160126	-3.11207	0.00185778	0.00851692
ENSG00000022277.14	ENST00000477573.1	183.002	-0.52664	0.193714	-2.71865	0.00655485	0.0246199
ENSG00000022556.17	ENST00000586512.1	1.80512	0.0696397	3.58535	0.0194234	0.984503
ENSG00000022567.11	ENST00000519067.5	93.8724	-0.231604	0.275838	-0.839638	0.401111	0.578539
ENSG00000022840.17	ENST00000544124.1	116.357	-0.68762	0.234927	-2.92695	0.003423	0.0142705
ENSG00000022976.17	ENST00000559098.5	307.474	0.166985	0.144815	1.15309	0.248875	0.41756
ENSG00000023041.13	ENST00000682143.1	306.423	-0.214677	0.219673	-0.977254	0.328443	0.505947
ENSG00000023171.21	ENST00000533341.3	23.4649	0.312011	0.497821	0.626754	0.53082
ENSG00000023191.18	ENST00000531223.1	122.07	-0.707022	0.327468	-2.15905	0.0308461	0.0871224
ENSG00000023228.16	ENST00000233190.11	1456.86	-0.131389	0.0904044	-1.45335	0.146126	0.286485
ENSG00000023287.14	ENST00000523594.1	208.999	-0.163739	0.253156	-0.646791	0.517767	0.680478
ENSG00000023318.10	ENST00000690306.1	59.4357	-0.13827	0.295882	-0.467314	0.640276	0.777674
ENSG00000023330.16	ENST00000459884.1	40.2536	-0.801917	0.388802	-2.06253	0.0391569	0.105306
ENSG00000023445.18	ENST00000527336.1	1.26581	0.0696256	3.37768	0.0206134	0.983554
ENSG00000023516.10	ENST00000025301.4	746.841	-0.107617	0.161128	-0.667896	0.5042	0.669543
ENSG00000023572.10	ENST00000608166.2	150.158	-0.321661	0.207557	-1.54975	0.121201	0.249924
ENSG00000023608.6	ENST00000923637.1	292.249	0.199351	0.163185	1.22162	0.22185	0.384697
ENSG00000023697.14	ENST00000532573.1	659.039	0.509244	0.155425	3.27646	0.00105116	0.00524571
ENSG00000023734.12	ENST00000539887.1	279.494	-0.430376	0.143514	-2.99885	0.00270999	0.0117433
ENSG00000023839.12	ENST00000496621.1	6.77401	1.08182	1.47649	0.732698	0.463743
ENSG00000023892.13	ENST00000468102.2	12.5997	-0.109429	0.805325	-0.135882	0.891914
ENSG00000023902.14	ENST00000441340.1	40.9167	-0.0187852	0.422767	-0.044434	0.964558	0.986491
ENSG00000023909.11	ENST00000370238.8	395.402	-0.110277	0.215042	-0.512814	0.608081	0.752967
ENSG00000024048.12	ENST00000910623.1	1433.42	0.364614	0.123781	2.94564	0.00322287	0.0135692
ENSG00000024422.13	ENST00000540884.1	11.5941	-0.541021	0.698532	-0.774511	0.438629
ENSG00000024526.18	ENST00000488146.5	430.253	-0.387333	0.179758	-2.15474	0.031182	0.0878943
ENSG00000024862.19	ENST00000617445.5	268.855	-0.13998	0.148854	-0.940384	0.347021	0.524881
ENSG00000025039.16	ENST00000936139.1	454.413	-0.0393067	0.11401	-0.344766	0.73027	0.842461
ENSG00000025156.14	ENST00000465214.2	367.527	-0.241023	0.243453	-0.99002	0.322165	0.499631
ENSG00000025293.18	ENST00000420233.1	13.5834	0.136585	0.754094	0.181125	0.85627
ENSG00000025423.12	ENST00000553476.1	11.0804	-0.662033	0.764906	-0.86551	0.386759
ENSG00000025434.20	ENST00000494018.1	11.9994	0.445773	0.909061	0.490366	0.623875
ENSG00000025770.20	ENST00000522304.1	90.2426	-0.481006	0.333894	-1.4406	0.149699	0.291673
ENSG00000025772.9	ENST00000879562.1	446.368	-0.276532	0.131494	-2.103	0.0354657	0.097358
ENSG00000025796.15	ENST00000489455.1	204.637	-0.310565	0.200313	-1.5504	0.121045	0.249689
ENSG00000025800.14	ENST00000446515.1	460.904	0.192717	0.172364	1.11808	0.263533	0.434493
ENSG00000026025.17	ENST00000497849.1	1591.83	-0.739392	0.399266	-1.85188	0.0640436	0.154673
ENSG00000026297.18	ENST00000683333.1	59.2676	-0.31265	0.316946	-0.986446	0.323914	0.50147
ENSG00000026508.22	ENST00000531141.1	54.2351	-0.192908	0.317034	-0.608477	0.542871	0.701991
ENSG00000026559.15	ENST00000506387.1	46.7129	-0.577598	0.433171	-1.33342	0.182394	0.335043
ENSG00000026652.16	ENST00000436279.1	1045.37	0.469595	0.148903	3.1537	0.00161215	0.00754539
ENSG00000026751.18	ENST00000495334.1	2.32106	0.0694037	6.12021	0.0113401	0.990952
ENSG00000026950.19	ENST00000865812.1	63.1783	-0.0552273	0.329322	-0.1677	0.866819	0.932421
ENSG00000027001.11	ENST00000469167.1	99.1057	-0.214247	0.230531	-0.929362	0.352702	0.530674
ENSG00000027075.18	ENST00000557559.1	2.03287	0.104908	1.59223	0.065887	0.947468
ENSG00000027644.5	ENST00000368195.4	8.11034	0.00497153	1.13801	0.0043686	0.996514
ENSG00000027697.17	ENST00000696695.1	378.016	-0.268173	0.120849	-2.21908	0.0264815	0.0770346
ENSG00000027847.15	ENST00000507061.1	35.9484	-0.521054	0.395147	-1.31863	0.187292	0.341415
ENSG00000027869.14	ENST00000468744.5	4.86169	-0.933515	1.63783	-0.56997	0.568698
ENSG00000028116.19	ENST00000916218.1	690.432	0.162354	0.168152	0.965522	0.334284	0.511706
ENSG00000028137.20	ENST00000489921.1	3.00423	0.0693837	6.12021	0.0113368	0.990955
ENSG00000028203.20	ENST00000552306.1	351.843	-0.000326621	0.186619	-0.0017502	0.998604	0.999301
ENSG00000028277.23	ENST00000598842.2	118.009	2.37465	1.59324	1.49045	0.136105	0.271952
ENSG00000028310.19	ENST00000497410.5	230.975	0.224942	0.205177	1.09633	0.272935	0.445248
ENSG00000028528.16	ENST00000559961.1	59.505	-0.0864819	0.367727	-0.23518	0.814069	0.898936
ENSG00000028839.10	ENST00000481694.1	50.6673	-0.174874	0.349894	-0.499793	0.617221	0.760234
ENSG00000029153.16	ENST00000539558.1	66.0571	0.632757	0.291846	2.16812	0.0301492	0.0855457
ENSG00000029363.18	ENST00000534321.1	285.031	-0.536052	0.174712	-3.06821	0.00215344	0.00967071
ENSG00000029364.13	ENST00000554023.1	73.6956	-0.0382401	0.282462	-0.135381	0.89231	0.947962
ENSG00000029534.22	ENST00000521407.1	26.9335	-0.536508	0.894103	-0.600052	0.548471	0.705992
ENSG00000029639.12	ENST00000495806.1	725.472	0.150784	0.147544	1.02196	0.3068	0.482972
ENSG00000029725.18	ENST00000572250.1	129.784	0.0473128	0.250664	0.18875	0.850289	0.921798
ENSG00000029993.16	ENST00000430118.1	195.104	-0.665883	0.1831	-3.63671	0.000276145	0.00165467
ENSG00000030066.15	ENST00000527126.1	73.9103	-0.135246	0.291368	-0.464175	0.642523	0.779351
ENSG00000030110.15	ENST00000886800.1	148.314	-0.47615	0.245892	-1.93642	0.0528165	0.133229
ENSG00000030419.18	ENST00000484040.1	22.2861	-0.115133	0.494817	-0.232678	0.816011
ENSG00000030582.20	ENST00000586242.1	410.457	-0.658343	0.244284	-2.69499	0.00703902	0.0261195
ENSG00000031003.12	ENST00000505281.1	50.7927	0.101681	0.373752	0.272054	0.785581	0.880171
ENSG00000031081.12	ENST00000861944.1	167.682	-0.034302	0.19698	-0.17414	0.861755	0.928856
ENSG00000031691.8	ENST00000954364.1	237.785	-0.0204174	0.226484	-0.0901492	0.928169	0.970101
ENSG00000031698.14	ENST00000468588.1	344.709	-0.534137	0.170521	-3.13238	0.00173398	0.00802958
ENSG00000031823.15	ENST00000587799.1	151.308	-0.617373	0.229062	-2.69523	0.00703409	0.0261047
ENSG00000032219.20	ENST00000466065.1	111.666	0.435591	0.333672	1.30545	0.191741	0.347338
ENSG00000032389.14	ENST00000496433.5	48.2084	-0.299669	0.371002	-0.80773	0.419246	0.596721
ENSG00000032742.19	ENST00000470695.1	14.0923	0.435034	0.599825	0.725269	0.468287
ENSG00000033011.15	ENST00000961948.1	211.635	-0.115934	0.168176	-0.689357	0.490598	0.658437
ENSG00000033030.17	ENST00000538116.5	437.243	-0.171917	0.149139	-1.15273	0.24902	0.41774
ENSG00000033050.10	ENST00000468073.5	394.103	-0.394853	0.146014	-2.70421	0.00684679	0.0255121
ENSG00000033100.17	ENST00000690444.1	90.4551	-0.256713	0.284648	-0.90186	0.367131	0.544474
ENSG00000033122.22	ENST00000565615.1	1.00448	0.998449	2.14047	0.466461	0.640885
ENSG00000033170.18	ENST00000557338.5	586.876	1.36935	0.156964	8.72393	2.68717e-18	1.29343e-16
ENSG00000033178.14	ENST00000514261.1	168.364	-0.181357	0.326602	-0.555285	0.5787	0.729839
ENSG00000033327.13	ENST00000528329.1	39.7752	-0.0206292	0.459292	-0.0449152	0.964175	0.986491
ENSG00000033627.19	ENST00000587797.1	384.802	-0.550164	0.145534	-3.78032	0.000156627	0.00101543
ENSG00000033800.15	ENST00000563996.1	391.673	-0.122542	0.128412	-0.954287	0.339938	0.517653
ENSG00000033867.19	ENST00000428005.1	531.804	0.931701	0.143056	6.51286	7.37316e-11	1.57062e-09
ENSG00000034053.16	ENST00000558358.1	156.086	-0.233459	0.241639	-0.966148	0.33397	0.511375
ENSG00000034152.21	ENST00000477540.1	94.8243	-0.656373	0.420124	-1.56233	0.11821	0.245513
ENSG00000034510.7	ENST00000877289.1	1212.39	-0.640059	0.169521	-3.77569	0.000159568	0.00103193
ENSG00000034533.13	ENST00000504725.1	19.4097	-0.780178	0.517015	-1.50901	0.131297
ENSG00000034677.14	ENST00000520903.1	77.6351	-0.0252945	0.422088	-0.059927	0.952214	0.983429
ENSG00000034693.16	ENST00000585848.1	82.3958	0.0114954	0.252901	0.0454541	0.963745	0.986491
ENSG00000034713.8	ENST00000565057.5	220.771	-0.6715	0.206085	-3.25837	0.00112055	0.00553353
ENSG00000034971.18	ENST00000971579.1	1.73112	-1.39149	2.75758	-0.504604	0.613837
ENSG00000035115.23	ENST00000602998.1	4.19601	-0.797703	1.29139	-0.617708	0.536768
ENSG00000035141.11	ENST00000460307.1	684.781	-0.543255	0.105302	-5.15901	2.48259e-07	3.01125e-06
ENSG00000035403.19	ENST00000472585.1	175.811	-0.430371	0.191534	-2.24697	0.0246419	0.0726931
ENSG00000035499.14	ENST00000505017.1	41.7801	-0.088735	0.348765	-0.254426	0.799166	0.889183
ENSG00000035681.11	ENST00000521972.1	62.8854	-0.12144	0.342774	-0.354285	0.723125	0.837545
ENSG00000035687.10	ENST00000462358.1	373.964	0.291085	0.183765	1.584	0.113193	0.237775
ENSG00000035720.9	ENST00000894639.1	0.589681	-0.389559	3.13381	-0.124308	0.901071
ENSG00000035862.14	ENST00000586057.5	333.964	-0.53919	0.162349	-3.32117	0.00089642	0.00459346
ENSG00000035928.18	ENST00000512726.1	108.429	-0.302624	0.716787	-0.422195	0.672882	0.80208
ENSG00000036054.14	ENST00000471273.1	243.888	-0.15891	0.24025	-0.661438	0.508331	0.672427
ENSG00000036257.15	ENST00000481135.1	110.139	-0.408308	0.368616	-1.10768	0.268001	0.439673
ENSG00000036448.11	ENST00000518513.1	85.2002	-0.499571	0.284648	-1.75505	0.0792512	0.181796
ENSG00000036473.10	ENST00000909241.1	1.79412	-0.844381	2.48828	-0.339343	0.734351
ENSG00000036530.10	ENST00000554611.5	52.2499	0.966815	0.544854	1.77445	0.075989	0.175979
ENSG00000036549.14	ENST00000458763.2	237.871	0.671375	0.202485	3.31569	0.000914188	0.00466793
ENSG00000036672.17	ENST00000525189.5	13.5338	-0.373689	0.737102	-0.50697	0.612176
ENSG00000036828.18	ENST00000643573.1	16.0069	0.0696719	2.15042	0.0323992	0.974154
ENSG00000037042.10	ENST00000588870.1	160.222	0.498541	0.182995	2.72435	0.00644285	0.0242631
ENSG00000037280.17	ENST00000510000.1	24.485	-0.027254	0.526818	-0.0517333	0.958741
ENSG00000037474.16	ENST00000502932.1	91.5883	-0.362806	0.271244	-1.33756	0.181039	0.333357
ENSG00000037637.12	ENST00000456164.5	68.4341	-0.195144	0.302619	-0.64485	0.519024	0.681603
ENSG00000037749.14	ENST00000856254.1	220.007	-0.253469	0.177991	-1.42406	0.15443	0.298417
ENSG00000037897.18	ENST00000548504.1	30.8817	-0.546737	0.563285	-0.970622	0.331736	0.509003
ENSG00000038002.10	ENST00000511231.1	34.606	-0.311286	0.463644	-0.671391	0.501972	0.668072
ENSG00000038219.14	ENST00000927661.1	902.369	-0.256604	0.143796	-1.7845	0.0743425	0.172983
ENSG00000038274.19	ENST00000695034.1	324.795	-0.376757	0.149168	-2.52572	0.011546	0.0392114
ENSG00000038295.8	ENST00000504560.5	81.3859	0.957282	0.287198	3.33318	0.000858597	0.00442801
ENSG00000038382.23	ENST00000510757.1	43.5658	-0.154334	0.428214	-0.360413	0.718538	0.834568
ENSG00000038427.16	ENST00000513016.5	1059.7	-0.376139	0.186971	-2.01175	0.0442465	0.115964
ENSG00000038532.18	ENST00000261657.5	680.331	0.0481778	0.140618	0.342616	0.731888	0.843479
ENSG00000038945.16	ENST00000520846.1	3.28483	1.05651	2.34764	0.450031	0.652688
ENSG00000039068.21	ENST00000567320.1	1.79139	0.0170597	2.76903	0.00616088	0.995084
ENSG00000039123.17	ENST00000505565.5	702.454	0.205638	0.178193	1.15401	0.248494	0.417093
ENSG00000039139.11	ENST00000682586.1	4.87241	0.630706	1.60403	0.393201	0.694171
ENSG00000039319.18	ENST00000512442.1	28.1263	0.4032	0.455664	0.884861	0.376231	0.553634
ENSG00000039523.21	ENST00000569733.6	260.777	-0.454538	0.190404	-2.38724	0.0169756	0.0536845
ENSG00000039560.15	ENST00000507883.1	67.716	-0.118305	0.332489	-0.355816	0.721978	0.836821
ENSG00000039600.12	ENST00000519442.1	42.3291	1.42826	0.830294	1.72019	0.0853983	0.192522
ENSG00000039987.8	ENST00000552539.1	8.62915	0.069669	2.29805	0.0303165	0.975815
ENSG00000040199.19	ENST00000564884.5	499.171	-0.182325	0.13577	-1.34289	0.179307	0.331047
ENSG00000040275.18	ENST00000508837.1	44.5578	-0.306165	0.391918	-0.781194	0.434688	0.611613
ENSG00000040341.19	ENST00000522061.5	1308.21	1.06547	0.157667	6.75771	1.40192e-11	3.30135e-10
ENSG00000040487.14	ENST00000432465.1	36.6126	-0.549494	0.472272	-1.16351	0.244622	0.412467
ENSG00000040531.17	ENST00000488623.6	401.155	-0.0677172	0.149526	-0.452879	0.650636	0.785424
ENSG00000040608.14	ENST00000425986.1	18.8047	-0.770248	0.637959	-1.20736	0.227293
ENSG00000040731.11	ENST00000503958.1	0.837909	1.52147	3.35947	0.452889	0.650629
ENSG00000040933.18	ENST00000468638.1	40.007	-0.10118	0.372562	-0.271578	0.785947	0.880408
ENSG00000041353.11	ENST00000592334.1	8.33717	-0.913211	0.883905	-1.03316	0.301531
ENSG00000041357.17	ENST00000560033.5	704.802	-0.422006	0.130945	-3.22278	0.00126954	0.00615449
ENSG00000041802.12	ENST00000466391.1	55.3716	-0.251076	0.388469	-0.646322	0.518071	0.680716
ENSG00000041880.16	ENST00000486510.1	10.7298	-0.427672	0.823893	-0.519087	0.6037
ENSG00000041982.18	ENST00000460345.1	909.717	-0.544101	0.123991	-4.38822	1.14282e-05	9.74849e-05
ENSG00000042088.15	ENST00000553569.1	19.2448	-0.269738	0.547571	-0.492609	0.622289
ENSG00000042286.16	ENST00000856741.1	891.921	-0.0297778	0.199057	-0.149595	0.881084	0.941066
ENSG00000042317.18	ENST00000554102.5	71.1689	0.574567	0.29193	1.96817	0.0490487	0.125643
ENSG00000042429.13	ENST00000533359.5	199.128	-0.325876	0.227876	-1.43006	0.1527	0.295915
ENSG00000042445.15	ENST00000482694.1	48.6454	-0.0668843	0.365357	-0.183066	0.854746	0.924561
ENSG00000042493.17	ENST00000483659.5	14.4102	-0.757501	0.71399	-1.06094	0.288717
ENSG00000042753.13	ENST00000600964.1	119.748	-0.842208	0.359849	-2.34045	0.0192606	0.0595082
ENSG00000042813.9	ENST00000465922.1	8.9337	0.0696769	2.25329	0.0309223	0.975331
ENSG00000043039.7	ENST00000605151.1	16.0607	-0.750936	0.587367	-1.27848	0.201081
ENSG00000043093.16	ENST00000292782.9	670.693	-0.0798283	0.165342	-0.482806	0.629233	0.769393
ENSG00000043143.23	ENST00000515554.1	57.5478	-0.450997	0.543172	-0.830302	0.406368	0.583932
ENSG00000043355.12	ENST00000481565.1	361.832	-0.738583	0.208354	-3.54485	0.000392831	0.00224638
ENSG00000043514.17	ENST00000467774.1	38.3516	-0.299961	0.40973	-0.732095	0.464111	0.635801
ENSG00000043591.6	ENST00000369295.4	2.48006	-0.28104	1.63974	-0.171393	0.863915
ENSG00000044115.22	ENST00000522792.1	385.614	-0.446712	0.140597	-3.17724	0.00148683	0.00703338
ENSG00000044446.13	ENST00000473597.1	46.9788	0.490083	0.359866	1.36185	0.173246	0.322978
ENSG00000044459.16	ENST00000484374.1	120.11	0.578966	0.215183	2.69058	0.00713287	0.0264147
ENSG00000044524.12	ENST00000452448.6	825.92	0.76418	0.144934	5.2726	1.34501e-07	1.71894e-06
ENSG00000044574.10	ENST00000680032.1	2450.92	-0.648269	0.0839556	-7.72156	1.14912e-14	3.80205e-13
ENSG00000046604.16	ENST00000684461.1	100.865	-0.338038	0.270986	-1.24744	0.212236	0.372897
ENSG00000046647.16	ENST00000398355.7	85.179	-0.297164	0.223812	-1.32774	0.184265	0.337563
ENSG00000046651.17	ENST00000485052.6	80.0696	-0.250251	0.288662	-0.866936	0.385977	0.563621
ENSG00000046653.15	ENST00000472735.5	268.978	-0.576156	0.166146	-3.46777	0.000524791	0.00288701
ENSG00000046774.10	ENST00000247452.4	0.497062	1.62171	5.66396	0.286322	0.774632
ENSG00000046889.20	ENST00000517617.1	139.656	0.408928	0.232371	1.75981	0.0784404	0.180366
ENSG00000047056.19	ENST00000704675.1	831.951	0.344667	0.167198	2.06143	0.0392623	0.105543
ENSG00000047188.17	ENST00000507567.1	54.4371	0.153731	0.365984	0.420047	0.674451	0.803312
ENSG00000047230.16	ENST00000483053.1	83.1333	-0.158974	0.319723	-0.497223	0.619032	0.76173
ENSG00000047249.19	ENST00000521335.1	108.339	-0.225547	0.246545	-0.914831	0.36028	0.53781
ENSG00000047315.17	ENST00000464918.1	189.1	-0.388083	0.197803	-1.96197	0.0497664	0.127087
ENSG00000047346.14	ENST00000568871.1	45.5737	-0.304313	0.398836	-0.763003	0.445462	0.621618
ENSG00000047365.14	ENST00000511416.1	12.1731	-0.355634	0.61147	-0.581606	0.560832
ENSG00000047410.14	ENST00000492973.1	113.235	0.0200581	0.280172	0.0715919	0.942927	0.978255
ENSG00000047578.15	ENST00000568622.1	15.975	0.598483	0.635184	0.942219	0.34608
ENSG00000047579.21	ENST00000462989.6	244.976	0.588688	0.165511	3.55679	0.00037542	0.00215973
ENSG00000047597.7	ENST00000378616.5	60.6249	-0.0283475	0.368904	-0.0768424	0.938749	0.976135
ENSG00000047617.18	ENST00000544988.1	67.4838	-0.224982	0.625003	-0.35997	0.71887	0.834781
ENSG00000047621.13	ENST00000535887.1	64.6814	0.534394	0.308143	1.73424	0.0828756	0.188113
ENSG00000047644.20	ENST00000466248.1	11.6209	-0.142529	0.675053	-0.211137	0.83278
ENSG00000047648.23	ENST00000491514.1	0.98232	0.0695967	4.09459	0.0169972	0.986439
ENSG00000047662.6	ENST00000265018.4	962.602	0.33004	0.231878	1.42334	0.154639	0.298717
ENSG00000047849.23	ENST00000462206.1	586.43	-0.444057	0.120263	-3.69238	0.000222164	0.00137334
ENSG00000047932.15	ENST00000964025.1	1321.93	-0.107897	0.165642	-0.651385	0.514798	0.677931
ENSG00000047936.12	ENST00000403284.2	8.45606	0.069674	2.2045	0.0316054	0.974787
ENSG00000048028.13	ENST00000544272.1	102.683	-0.38555	0.290875	-1.32548	0.185011	0.338495
ENSG00000048052.26	ENST00000425071.5	663.874	2.10679	0.155066	13.5864	4.82453e-42	1.01499e-39
ENSG00000048162.23	ENST00000510608.1	118.281	-0.508001	0.309195	-1.64298	0.100387	0.217366
ENSG00000048342.19	ENST00000652443.1	19.1947	-0.44315	0.494606	-0.895966	0.370271
ENSG00000048392.14	ENST00000395910.6	85.4708	0.046529	0.337695	0.137784	0.890411	0.946646
ENSG00000048405.12	ENST00000485577.1	704.195	0.0840451	0.200862	0.418423	0.675638	0.804273
ENSG00000048471.15	ENST00000568359.1	33.503	0.550746	0.40701	1.35315	0.176008	0.326626
ENSG00000048544.8	ENST00000934614.1	421.813	-0.303542	0.130729	-2.32192	0.0202373	0.0619409
ENSG00000048545.18	ENST00000679182.1	16.6129	0.0696749	2.16499	0.0321825	0.974327
ENSG00000048649.14	ENST00000529470.1	54.4123	-0.275531	0.382561	-0.720228	0.471385	0.641799
ENSG00000048707.15	ENST00000643711.1	70.1498	-0.000198051	0.360244	-0.000549768	0.999561	0.999763
ENSG00000048740.20	ENST00000904655.1	1523.04	0.76166	0.0960952	7.9261	2.26139e-15	7.8797e-14
ENSG00000048828.19	ENST00000475933.1	161.889	-0.142146	0.206696	-0.687709	0.491636	0.65937
ENSG00000048991.19	ENST00000487294.1	180.743	0.326217	0.229282	1.42278	0.154801	0.298945
ENSG00000049089.16	ENST00000427563.1	8.97802	-0.136593	0.923439	-0.147918	0.882407
ENSG00000049130.17	ENST00000378535.4	266.174	-0.123437	0.176631	-0.698841	0.484651	0.653215
ENSG00000049167.17	ENST00000682750.1	61.1079	-0.0322231	0.353557	-0.0911399	0.927381	0.96965
ENSG00000049192.15	ENST00000502886.1	66.7482	0.399358	0.32958	1.21172	0.225621	0.38939
ENSG00000049239.14	ENST00000495451.1	88.4534	-0.540913	0.288442	-1.87529	0.060753	0.148709
ENSG00000049245.13	ENST00000054666.11	579.624	-0.365803	0.113884	-3.21206	0.00131785	0.00635479
ENSG00000049246.16	ENST00000473653.1	7.10337	-0.400791	1.0335	-0.3878	0.698164
ENSG00000049247.14	ENST00000377516.6	64.219	0.0696532	2.06543	0.0337234	0.973098	0.986491
ENSG00000049249.11	ENST00000674210.1	70.1358	-0.528298	1.35759	-0.389144	0.69717	0.819982
ENSG00000049323.17	ENST00000432635.1	203.708	0.684178	0.193663	3.53282	0.000411152	0.00233818
ENSG00000049449.11	ENST00000528630.1	585.939	-0.471947	0.178684	-2.64124	0.00826033	0.0298349
ENSG00000049540.20	ENST00000477397.1	2.54455	0.069651	3.58439	0.0194318	0.984497
ENSG00000049541.12	ENST00000485545.5	276.606	-0.0368257	0.190524	-0.193286	0.846735	0.920687
ENSG00000049618.26	ENST00000635928.1	592.74	-0.372007	0.14812	-2.51153	0.012021	0.0404871
ENSG00000049656.15	ENST00000515719.5	344.439	-0.234723	0.185472	-1.26555	0.205675	0.364895
ENSG00000049759.21	ENST00000590506.1	95.2038	-0.558684	0.252972	-2.20848	0.0272105	0.0787048
ENSG00000049769.15	ENST00000495799.5	143.149	-0.318571	0.211579	-1.50569	0.132148	0.266151
ENSG00000049860.14	ENST00000509579.1	43.1044	-0.404164	0.365275	-1.10647	0.268525	0.44035
ENSG00000049883.16	ENST00000380639.10	326.793	-0.0352339	0.185559	-0.18988	0.849403	0.921302
ENSG00000050030.16	ENST00000642681.2	225.667	1.11075	0.288169	3.85451	0.000115962	0.000783492
ENSG00000050130.19	ENST00000553156.2	24.3413	-0.2616	0.475934	-0.549656	0.582555
ENSG00000050327.16	ENST00000474817.5	12.9032	0.130841	0.775946	0.168621	0.866095
ENSG00000050344.10	ENST00000606261.1	55.5249	-0.494888	0.379225	-1.305	0.191894	0.347537
ENSG00000050393.13	ENST00000607303.1	393.45	-0.327004	0.205416	-1.59191	0.111404	0.23487
ENSG00000050405.15	ENST00000550611.1	108.527	-0.539925	0.289016	-1.86815	0.0617412	0.150533
ENSG00000050426.17	ENST00000548390.5	107.618	0.047449	0.256243	0.185172	0.853094	0.923548
ENSG00000050438.18	ENST00000546663.1	15.1266	-1.46892	0.905081	-1.62297	0.104597
ENSG00000050555.20	ENST00000679272.1	45.8839	0.116538	0.449351	0.259348	0.795367	0.886552
ENSG00000050628.22	ENST00000356595.8	1340.92	0.0510677	0.238476	0.214141	0.830437	0.909649
ENSG00000050730.17	ENST00000506753.1	0.622066	-1.43071	3.73481	-0.383074	0.701665
ENSG00000050748.19	ENST00000520212.6	203.588	-0.335772	0.184718	-1.81776	0.0691011	0.163501
ENSG00000050767.18	ENST00000484750.1	248.343	1.68124	0.333098	5.0473	4.48094e-07	5.13972e-06
ENSG00000050820.18	ENST00000564170.1	20.0852	-0.331257	0.55946	-0.592101	0.553783
ENSG00000051009.12	ENST00000532797.1	34.6687	-0.412195	0.419999	-0.981419	0.326386	0.504091
ENSG00000051108.16	ENST00000568814.1	94.4829	-0.665034	0.270863	-2.45524	0.014079	0.0460552
ENSG00000051128.20	ENST00000599808.1	15.1101	0.355126	0.631972	0.561933	0.574162
ENSG00000051180.18	ENST00000533741.1	159.183	0.510186	0.17608	2.89747	0.00376184	0.0154516
ENSG00000051341.16	ENST00000683498.1	73.1765	0.548446	0.317893	1.72525	0.0844822	0.190916
ENSG00000051382.11	ENST00000485060.1	14.0873	-0.493189	0.540696	-0.912138	0.361696
ENSG00000051596.11	ENST00000505969.1	135.265	-0.506875	0.211666	-2.39469	0.0166345	0.0528209
ENSG00000051620.12	ENST00000858693.1	428.921	-0.392531	0.128806	-3.04746	0.00230782	0.0102609
ENSG00000051825.16	ENST00000544217.1	215.782	-0.0228671	0.228975	-0.099867	0.92045	0.965373
ENSG00000052126.18	ENST00000700683.1	753.817	1.29233	0.15749	8.2058	2.29053e-16	9.15459e-15
ENSG00000052723.13	ENST00000369528.9	807.109	-0.364534	0.191567	-1.9029	0.0570531	0.141534
ENSG00000052749.15	ENST00000479317.1	49.5526	-0.685905	0.325893	-2.10469	0.0353183	0.0970293
ENSG00000052795.14	ENST00000504715.1	135.452	0.456329	0.230892	1.97637	0.0481125	0.123711
ENSG00000052802.14	ENST00000906534.1	228.177	-0.398799	0.23498	-1.69716	0.0896663	0.199709
ENSG00000052841.17	ENST00000524936.1	52.4862	0.120344	0.330058	0.364614	0.715399	0.832382
ENSG00000052850.8	ENST00000652299.1	165.497	-0.112428	0.21769	-0.516457	0.605535	0.750852
ENSG00000053108.19	ENST00000510685.1	609.42	0.984405	0.216929	4.53792	5.68111e-06	5.14707e-05
ENSG00000053254.17	ENST00000557261.1	21.0231	0.600536	0.537938	1.11637	0.264265
ENSG00000053328.10	ENST00000490043.1	103.353	-1.03533	0.470206	-2.20187	0.0276748	0.0797575
ENSG00000053371.14	ENST00000492217.1	241.107	-0.100735	0.203335	-0.495413	0.620308	0.762751
ENSG00000053372.6	ENST00000479559.1	125.856	-0.686113	0.219165	-3.13058	0.00174461	0.00807307
ENSG00000053438.11	ENST00000647955.1	4.0426	1.4912	2.31658	0.643705	0.519767
ENSG00000053747.17	ENST00000586709.1	4.41375	0.272914	1.12162	0.243323	0.807756
ENSG00000053770.13	ENST00000556377.1	90.7889	-0.518082	0.327084	-1.58394	0.113206	0.237795
ENSG00000053900.12	ENST00000507925.1	33.0052	0.06657	0.378375	0.175937	0.860344	0.928061
ENSG00000053918.21	ENST00000380776.5	899.769	0.624877	0.410143	1.52356	0.127619	0.259496
ENSG00000054116.13	ENST00000462715.1	337.235	-0.450449	0.130556	-3.45024	0.000560095	0.00305847
ENSG00000054118.16	ENST00000466743.1	496.23	-0.492762	0.180515	-2.72975	0.00633827	0.023924
ENSG00000054179.13	ENST00000460614.1	4.45802	-1.38393	2.43306	-0.568801	0.569491
ENSG00000054219.12	ENST00000471164.1	0.700804	0.069536	5.0504	0.0137684	0.989015
ENSG00000054267.23	ENST00000462969.1	47.0186	0.24132	0.431104	0.559773	0.575635	0.72752
ENSG00000054277.14	ENST00000478849.1	774.273	-0.369433	0.202276	-1.82638	0.067793	0.161203
ENSG00000054282.17	ENST00000491888.1	42.6668	0.227896	0.484166	0.470699	0.637856	0.77584
ENSG00000054392.14	ENST00000367009.2	171.307	0.640472	0.192556	3.32616	0.000880512	0.0045255
ENSG00000054523.21	ENST00000495136.1	54.763	1.00272	0.318061	3.1526	0.00161826	0.00756933
ENSG00000054598.9	ENST00000645831.2	1675.21	-0.72766	0.109188	-6.66429	2.65946e-11	6.04362e-10
ENSG00000054611.15	ENST00000441936.5	188.459	1.10693	0.290247	3.81375	0.000136872	0.000901629
ENSG00000054654.20	ENST00000557307.1	33.0994	-0.354536	0.421566	-0.840998	0.400349	0.577858
ENSG00000054690.15	ENST00000559168.1	118.191	0.0251033	0.281805	0.0890802	0.929018	0.970522
ENSG00000054793.15	ENST00000477492.1	21.487	0.0176877	0.53241	0.033222	0.973498
ENSG00000054965.12	ENST00000632101.1	1634.19	1.27094	0.128804	9.86727	5.77138e-23	4.0956e-21
ENSG00000054967.14	ENST00000545886.1	141.633	-0.0918534	0.313916	-0.292605	0.769824	0.869291
ENSG00000055044.12	ENST00000478508.1	164.622	0.600264	0.352639	1.7022	0.0887173	0.198139
ENSG00000055070.18	ENST00000913786.1	1355.38	-0.400498	0.153744	-2.60496	0.00918854	0.0326006
ENSG00000055118.19	ENST00000683359.1	2.03071	0.0359906	2.15576	0.0166951	0.98668
ENSG00000055130.19	ENST00000660013.1	943.591	0.478829	0.146158	3.2761	0.00105252	0.00524945
ENSG00000055147.20	ENST00000518946.1	31.6678	-0.473079	0.392235	-1.20611	0.227775	0.391865
ENSG00000055163.22	ENST00000520960.2	129.201	-0.399321	0.240233	-1.66222	0.0964685	0.210892
ENSG00000055208.21	ENST00000470466.5	3089.99	-0.0378932	0.175289	-0.216175	0.828851	0.908791
ENSG00000055211.15	ENST00000433539.1	102.494	0.261575	0.29396	0.889834	0.373555	0.550763
ENSG00000055332.20	ENST00000681516.1	1332.84	-0.329027	0.171774	-1.91546	0.055434	0.138336
ENSG00000055483.21	ENST00000592326.1	87.4178	-0.414132	0.299809	-1.38132	0.167181	0.315209
ENSG00000055609.21	ENST00000558665.2	1277.17	-0.204612	0.138277	-1.47973	0.138946	0.276075
ENSG00000055732.14	ENST00000474447.1	85.0177	0.210316	0.300103	0.700814	0.483419	0.65219
ENSG00000055813.7	ENST00000963881.1	67.4964	1.06503	0.464243	2.29413	0.0217832	0.0657592
ENSG00000055917.18	ENST00000440577.5	3031.95	0.140743	0.131516	1.07016	0.284549	0.458107
ENSG00000055950.18	ENST00000493646.1	301.346	-0.430714	0.230189	-1.87114	0.0613263	0.149751
ENSG00000055955.18	ENST00000471505.1	3.81833	-1.01897	1.44849	-0.703474	0.481761
ENSG00000055957.12	ENST00000494705.1	12.9298	0.0696828	2.22988	0.0312496	0.975071
ENSG00000056050.8	ENST00000506125.1	136.343	-0.354791	0.320346	-1.10752	0.268068	0.43974
ENSG00000056097.17	ENST00000502988.5	661.514	-0.127716	0.181274	-0.704549	0.481091	0.650349
ENSG00000056277.17	ENST00000930023.1	689.789	0.306608	0.199916	1.53369	0.125106	0.255763
ENSG00000056291.20	ENST00000506359.1	0.896984	0.0696088	3.77671	0.0184311	0.985295
ENSG00000056487.18	ENST00000491522.1	4.80093	-0.224011	1.11797	-0.200373	0.841189
ENSG00000056586.17	ENST00000398671.2	121.394	-0.289709	0.222607	-1.30143	0.19311	0.34898
ENSG00000056736.11	ENST00000899724.1	99.3382	-0.0572335	0.332498	-0.172132	0.863334	0.929915
ENSG00000056972.22	ENST00000699907.1	47.6828	-0.538072	0.333897	-1.61149	0.107073	0.227867
ENSG00000056998.22	ENST00000453106.1	91.5569	0.00761145	0.279305	0.0272514	0.978259	0.988031
ENSG00000057019.17	ENST00000496736.1	41.3819	-0.161044	0.3657	-0.440372	0.659668	0.792164
ENSG00000057252.14	ENST00000540564.5	891.79	-0.0481114	0.0946955	-0.508064	0.611409	0.755384
ENSG00000057294.19	ENST00000546769.1	50.1115	-0.45367	0.324785	-1.39683	0.162464	0.309045
ENSG00000057468.7	ENST00000263187.4	693.6	0.637699	0.192519	3.31239	0.00092503	0.00471436
ENSG00000057593.15	ENST00000473085.1	5.65723	0.069676	2.393	0.0291165	0.976772
ENSG00000057608.19	ENST00000479928.1	964.157	-0.540314	0.146515	-3.68777	0.000226224	0.00139437
ENSG00000057663.17	ENST00000475645.1	257.956	-0.0440885	0.235037	-0.187581	0.851205	0.922389
ENSG00000057704.14	ENST00000896389.1	212.837	0.582102	0.182867	3.18319	0.00145662	0.00691111
ENSG00000057757.11	ENST00000374524.1	455.87	-0.478731	0.153399	-3.12083	0.00180341	0.00830231
ENSG00000057935.15	ENST00000482875.5	111.932	-0.0877525	0.219715	-0.399392	0.689604	0.814529
ENSG00000058056.11	ENST00000680930.1	28.3297	-0.56876	0.43337	-1.31241	0.189381	0.344172
ENSG00000058063.18	ENST00000475636.2	405.121	-0.17622	0.220772	-0.798199	0.424755	0.602076
ENSG00000058085.16	ENST00000476255.1	3.26589	2.4369	2.16575	1.1252	0.260504
ENSG00000058262.12	ENST00000699284.1	957.552	-0.532285	0.154841	-3.43763	0.000586832	0.00318374
ENSG00000058272.20	ENST00000551781.2	128.929	-0.181197	0.356103	-0.508833	0.61087	0.754959
ENSG00000058404.22	ENST00000427209.1	354.141	1.08508	0.312429	3.47305	0.000514572	0.00283747
ENSG00000058453.18	ENST00000498688.5	42.959	0.658319	0.40081	1.64247	0.100492	0.217533
ENSG00000058600.17	ENST00000565117.1	121.445	0.0291357	0.241251	0.120769	0.903874	0.95537
ENSG00000058668.17	ENST00000484746.1	739.308	-0.355954	0.11683	-3.04675	0.00231327	0.0102826
ENSG00000058673.17	ENST00000480354.1	158.493	-0.548446	0.222036	-2.47008	0.0135084	0.0445096
ENSG00000058729.12	ENST00000508991.1	68.5783	-0.303734	0.284437	-1.06784	0.285591	0.459293
ENSG00000058799.16	ENST00000472983.1	133.217	-0.263443	0.253432	-1.0395	0.298571	0.473734
ENSG00000058804.13	ENST00000923528.1	2633.05	-0.0270175	0.129513	-0.208608	0.834754	0.912642
ENSG00000059122.18	ENST00000344592.9	257.587	-0.134355	0.228187	-0.588792	0.556001	0.711674
ENSG00000059145.20	ENST00000562537.1	83.1608	-0.383931	0.304721	-1.25994	0.207691	0.367503
ENSG00000059377.20	ENST00000473948.6	57.2652	0.148332	0.307124	0.482971	0.629116	0.769317
ENSG00000059378.14	ENST00000489383.1	7.39485	0.149494	0.876366	0.170585	0.86455
ENSG00000059573.10	ENST00000485428.1	402.21	-0.41625	0.123817	-3.36183	0.00077429	0.00404818
ENSG00000059588.11	ENST00000471918.1	52.1759	-0.0697699	0.400667	-0.174134	0.86176	0.928856
ENSG00000059691.13	ENST00000515490.1	107.138	0.0286415	0.31555	0.0907669	0.927678	0.969771
ENSG00000059758.9	ENST00000549899.1	27.8289	-0.539664	0.435101	-1.24032	0.214857	0.376224
ENSG00000059769.21	ENST00000905076.1	597.134	-0.269804	0.151954	-1.77556	0.0758053	0.175644
ENSG00000059804.19	ENST00000469295.1	30.4076	-0.494219	0.523445	-0.944166	0.345085	0.522754
ENSG00000059915.18	ENST00000479172.5	4.25313	-0.569144	1.694	-0.335977	0.736888
ENSG00000060069.19	ENST00000299543.9	258.875	0.0247397	0.210543	0.117504	0.90646	0.957095
ENSG00000060138.14	ENST00000366290.2	1279.74	-0.667412	0.166725	-4.00308	6.25221e-05	0.000449371
ENSG00000060140.10	ENST00000538867.5	300.191	1.35642	0.545349	2.48725	0.0128734	0.042771
ENSG00000060237.20	ENST00000540885.1	462.955	-0.392052	0.174269	-2.24969	0.0244685	0.0723109
ENSG00000060339.15	ENST00000483264.1	240.255	0.41773	0.180703	2.31169	0.0207948	0.0633452
ENSG00000060491.18	ENST00000370461.5	301.772	-0.113668	0.24138	-0.470907	0.637707	0.775751
ENSG00000060558.4	ENST00000262958.4	14.6507	-0.52641	1.46189	-0.360089	0.718781
ENSG00000060566.15	ENST00000602257.5	5.13041	0.0693348	6.12021	0.0113288	0.990961
ENSG00000060642.13	ENST00000674317.1	111.476	-0.190486	0.23787	-0.800801	0.423247	0.600559
ENSG00000060656.21	ENST00000465525.6	254.64	-0.0492728	0.25175	-0.195721	0.844829	0.919331
ENSG00000060688.14	ENST00000491106.1	155.998	-0.551498	0.231298	-2.38437	0.0171086	0.0540245
ENSG00000060709.18	ENST00000540658.1	5.42479	-1.38408	2.44013	-0.567216	0.570567
ENSG00000060749.17	ENST00000527788.5	2355.78	-0.298345	0.191047	-1.56163	0.118375	0.245722
ENSG00000060762.21	ENST00000366868.5	284.049	-0.202872	0.164002	-1.237	0.216086	0.377763
ENSG00000060971.20	ENST00000469600.1	57.5181	-0.240591	0.280415	-0.857982	0.390902	0.568232
ENSG00000060982.16	ENST00000355164.3	42.0417	-0.0503355	0.353744	-0.142294	0.886848	0.944539
ENSG00000061273.19	ENST00000463732.5	12.4074	0.027274	0.715277	0.0381307	0.969584
ENSG00000061337.16	ENST00000265801.6	50.5402	-0.588085	0.372929	-1.57694	0.11481	0.240407
ENSG00000061455.12	ENST00000464424.1	722.454	0.465894	0.172189	2.70572	0.00681569	0.0254198
ENSG00000061492.12	ENST00000361560.6	2.36058	0.0306226	2.47195	0.012388	0.990116
ENSG00000061656.12	ENST00000454819.1	8.92737	-0.0213791	0.777733	-0.027489	0.97807
ENSG00000061676.17	ENST00000492058.1	31.3871	-0.450836	0.478547	-0.942093	0.346145	0.523959
ENSG00000061794.14	ENST00000542199.1	392.687	-0.140745	0.13787	-1.02085	0.307326	0.483569
ENSG00000061918.15	ENST00000879916.1	201.593	-0.342469	0.205692	-1.66496	0.0959204	0.209994
ENSG00000061936.11	ENST00000535399.1	179.496	0.0800709	0.220067	0.363847	0.715972	0.832811
ENSG00000061938.22	ENST00000673236.1	242.084	0.0203559	0.301803	0.0674479	0.946225	0.980316
ENSG00000061987.17	ENST00000551397.1	110.975	0.384644	0.274723	1.40012	0.161478	0.307829
ENSG00000062038.16	ENST00000568292.1	11.3803	-0.401487	0.930351	-0.431543	0.666073
ENSG00000062096.16	ENST00000886825.1	5.96172	1.53513	2.3329	0.658037	0.510515
ENSG00000062194.17	ENST00000309096.4	342.495	-0.0551011	0.238883	-0.230661	0.817578	0.901416
ENSG00000062282.16	ENST00000605608.1	67.5524	-0.629015	0.871101	-0.722092	0.470238	0.640767
ENSG00000062370.18	ENST00000911246.1	224.971	-0.221534	0.255164	-0.868204	0.385283	0.562943
ENSG00000062485.20	ENST00000548746.5	2398.99	-0.618675	0.0835946	-7.4009	1.35269e-13	4.00426e-12
ENSG00000062524.17	ENST00000569283.1	16.5645	0.865263	0.595011	1.4542	0.145891
ENSG00000062582.15	ENST00000934255.1	505.428	-0.687987	0.202877	-3.39116	0.000695974	0.00368952
ENSG00000062598.19	ENST00000452857.5	149.838	-0.363792	0.202242	-1.79879	0.0720512	0.168934
ENSG00000062650.21	ENST00000484070.1	480.021	-0.179418	0.127458	-1.40766	0.159232	0.305056
ENSG00000062716.14	ENST00000710771.1	334.844	-0.386434	0.178868	-2.16044	0.0307386	0.0868925
ENSG00000062725.11	ENST00000592995.1	104.605	-0.181317	0.277485	-0.65343	0.513479	0.676761
ENSG00000063015.21	ENST00000544224.2	53.4602	0.0696672	2.0902	0.0333303	0.973411	0.986491
ENSG00000063046.19	ENST00000549592.1	1129.77	-0.56599	0.169075	-3.34757	0.00081523	0.00423133
ENSG00000063127.16	ENST00000594917.1	76.508	0.214722	0.310704	0.691081	0.489515	0.657395
ENSG00000063169.13	ENST00000602258.1	83.7975	0.0273864	0.337012	0.0812623	0.935233	0.974146
ENSG00000063176.17	ENST00000599748.5	155.664	-0.350457	0.271196	-1.29227	0.196265	0.353053
ENSG00000063177.14	ENST00000549533.1	2040.76	-0.628002	0.190032	-3.30472	0.000950704	0.00482352
ENSG00000063180.10	ENST00000596080.1	22.2858	-0.221879	0.539616	-0.411179	0.680941
ENSG00000063322.16	ENST00000615911.4	636.506	-0.476322	0.120991	-3.93683	8.25646e-05	0.00057752
ENSG00000063438.21	ENST00000507048.1	266.207	-0.131898	0.213653	-0.617345	0.537007	0.697048
ENSG00000063515.3	ENST00000086933.3	53.8556	-1.37325	2.0585	-0.667115	0.504699	0.669788
ENSG00000063587.15	ENST00000647705.1	256.242	-0.525113	0.166146	-3.16056	0.00157469	0.00739321
ENSG00000063601.18	ENST00000493480.1	93.7229	-0.104783	0.314839	-0.332814	0.739275	0.848688
ENSG00000063660.10	ENST00000466624.1	55.9723	-0.381993	0.348177	-1.09712	0.272588	0.444823
ENSG00000063761.17	ENST00000555217.1	110.26	-0.164402	0.272065	-0.604273	0.545662	0.704298
ENSG00000063854.14	ENST00000567398.1	55.0517	0.0225386	0.344738	0.0653789	0.947872	0.981179
ENSG00000064012.25	ENST00000696086.1	30.6302	-0.688608	0.462068	-1.49028	0.136152	0.27203
ENSG00000064042.19	ENST00000505705.1	28.2639	-0.367957	0.505395	-0.728059	0.466577	0.63754
ENSG00000064102.16	ENST00000538748.1	25.7064	-0.20347	0.475255	-0.428127	0.668559
ENSG00000064115.12	ENST00000544179.1	70.5052	-0.609023	0.287742	-2.11656	0.0342973	0.0947823
ENSG00000064195.7	ENST00000512495.2	14.8415	0.108435	1.26014	0.0860496	0.931427
ENSG00000064199.8	ENST00000529498.1	6.51684	-1.0225	0.831562	-1.22961	0.218842
ENSG00000064205.12	ENST00000497421.1	1.99472	1.48082	2.68081	0.552378	0.580689
ENSG00000064218.6	ENST00000417254.1	0.539005	-1.94885	4.10768	-0.47444	0.635186
ENSG00000064225.14	ENST00000465004.1	245.581	0.535968	0.157014	3.4135	0.00064134	0.00343376
ENSG00000064300.9	ENST00000172229.8	50.7613	-1.48245	0.598351	-2.47756	0.0132284	0.0437638
ENSG00000064309.17	ENST00000683597.1	295.126	-0.398662	0.145891	-2.73261	0.00628344	0.0237501
ENSG00000064393.17	ENST00000406875.8	3367.36	-0.0912842	0.0837352	-1.09015	0.275646	0.448404
ENSG00000064419.15	ENST00000961760.1	1590.65	0.315742	0.0860619	3.66878	0.000243711	0.00148588
ENSG00000064490.15	ENST00000543118.1	22.7931	0.0915366	0.545613	0.167768	0.866765
ENSG00000064545.16	ENST00000591443.1	78.1073	-0.68511	0.463484	-1.47817	0.139361	0.2767
ENSG00000064601.22	ENST00000606000.1	135.887	-0.412125	0.298847	-1.37905	0.167879	0.316169
ENSG00000064607.18	ENST00000598863.1	324.965	-0.029778	0.174975	-0.170185	0.864865	0.931028
ENSG00000064651.15	ENST00000502849.1	66.7841	-0.0307556	0.375384	-0.0819311	0.934701	0.97389
ENSG00000064652.12	ENST00000515729.1	23.5199	0.337848	0.486065	0.695068	0.487013
ENSG00000064655.21	ENST00000458636.2	231.427	0.392462	0.191228	2.05233	0.0401379	0.107385
ENSG00000064666.16	ENST00000564572.1	87.5372	-0.76177	0.301834	-2.52381	0.0116091	0.039388
ENSG00000064692.21	ENST00000513719.1	22.9105	-0.689998	0.563594	-1.22428	0.220846
ENSG00000064703.14	ENST00000475700.1	343.589	-0.387734	0.140706	-2.75564	0.00585777	0.0223857
ENSG00000064726.11	ENST00000944299.1	1483.99	-0.0675293	0.104741	-0.644728	0.519103	0.681645
ENSG00000064763.13	ENST00000550541.1	31.206	0.241055	0.425638	0.566338	0.571164	0.724058
ENSG00000064787.15	ENST00000690125.1	28.4055	-0.650174	0.866179	-0.750623	0.45288	0.628599
ENSG00000064835.12	ENST00000350375.7	4.95575	0.0696789	2.39974	0.029036	0.976836
ENSG00000064886.15	ENST00000530597.1	2.96636	0.0696661	2.70702	0.0257353	0.979468
ENSG00000064932.17	ENST00000587673.5	51.5207	0.145379	0.368949	0.394036	0.693555	0.817586
ENSG00000064933.20	ENST00000483293.1	168.963	0.079346	0.237347	0.334304	0.738151	0.847925
ENSG00000064961.20	ENST00000585741.1	68.7045	0.3378	0.303845	1.11175	0.266245	0.437671
ENSG00000064989.14	ENST00000479784.1	7.39114	0.356942	0.881382	0.40498	0.685492
ENSG00000064995.20	ENST00000691871.1	178.732	0.0440144	0.218434	0.201499	0.840308	0.916282
ENSG00000064999.17	ENST00000698908.1	625.821	-0.153469	0.16554	-0.927079	0.353886	0.531861
ENSG00000065000.21	ENST00000586370.6	968.539	-0.337429	0.157127	-2.14748	0.0317548	0.0891642
ENSG00000065029.16	ENST00000479226.1	58.7228	-0.208107	0.396549	-0.524794	0.599727	0.746406
ENSG00000065054.15	ENST00000564033.1	87.284	-0.575182	0.325162	-1.76891	0.0769086	0.177635
ENSG00000065057.10	ENST00000623977.1	81.8895	0.0880305	0.469602	0.187458	0.851302	0.922452
ENSG00000065060.18	ENST00000192788.6	683.512	0.0708466	0.0994832	0.712146	0.476374	0.64629
ENSG00000065150.22	ENST00000468620.1	720.719	-0.513439	0.130562	-3.93253	8.40564e-05	0.000586919
ENSG00000065154.13	ENST00000483711.1	182.191	-0.419199	0.205309	-2.0418	0.0411717	0.109604
ENSG00000065183.17	ENST00000487202.5	341.983	-0.509721	0.167867	-3.03645	0.0023938	0.0105763
ENSG00000065243.21	ENST00000495119.1	70.0247	-0.329056	0.307188	-1.07119	0.284086	0.457598
ENSG00000065268.12	ENST00000591276.1	106.67	-0.510647	0.325762	-1.56755	0.116987	0.243694
ENSG00000065308.6	ENST00000182527.4	438.874	-0.166959	0.137252	-1.21644	0.223818	0.387099
ENSG00000065320.10	ENST00000173229.7	1369.8	0.763223	0.124638	6.12351	9.15377e-10	1.70458e-08
ENSG00000065328.18	ENST00000459751.1	93.3299	-0.323651	0.292723	-1.10566	0.268875	0.440755
ENSG00000065357.21	ENST00000550115.5	13.6508	-0.924924	1.85371	-0.498958	0.617809
ENSG00000065361.18	ENST00000546748.1	6.05506	1.72144	1.92647	0.893575	0.371549
ENSG00000065413.21	ENST00000486006.1	2.66692	0.200177	1.52112	0.131599	0.895302
ENSG00000065427.16	ENST00000566772.1	178.288	-0.698168	0.179938	-3.88006	0.000104432	0.000712897
ENSG00000065457.12	ENST00000568510.1	271.476	-0.108412	0.179961	-0.602418	0.546896	0.705053
ENSG00000065485.21	ENST00000472319.5	174.622	0.488831	0.198935	2.45724	0.014001	0.0458457
ENSG00000065491.9	ENST00000942344.1	529.209	0.146448	0.109421	1.33839	0.180768	0.333021
ENSG00000065518.9	ENST00000496588.1	85.3514	-0.442614	0.264883	-1.67098	0.094726	0.208121
ENSG00000065526.13	ENST00000704274.1	4784.21	-0.521905	0.107517	-4.85415	1.20901e-06	1.27623e-05
ENSG00000065534.21	ENST00000692507.1	25.0825	-0.92049	0.556666	-1.65358	0.0982138
ENSG00000065548.20	ENST00000445547.1	387.497	-0.427731	0.213113	-2.00707	0.0447426	0.116999
ENSG00000065559.16	ENST00000536413.2	465.092	-0.310636	0.154705	-2.00793	0.044651	0.116798
ENSG00000065600.14	ENST00000478166.5	38.3073	-0.0238427	0.383351	-0.0621956	0.950407	0.982461
ENSG00000065609.16	ENST00000523780.1	2.91932	0.289513	1.44588	0.200233	0.841298
ENSG00000065613.16	ENST00000946374.1	1838.64	-0.237662	0.191564	-1.24064	0.21474	0.376086
ENSG00000065615.15	ENST00000479164.1	113.885	0.0927028	0.282181	0.328522	0.742517	0.850991
ENSG00000065618.22	ENST00000433822.1	2.7756	1.08018	2.3355	0.462507	0.643718
ENSG00000065621.16	ENST00000498052.1	18.3671	-0.457562	0.7294	-0.627314	0.530454
ENSG00000065665.22	ENST00000466451.1	20.7512	-0.170971	0.609562	-0.280481	0.779108
ENSG00000065675.17	ENST00000915288.1	172.254	0.184109	0.211423	0.870807	0.383859	0.561488
ENSG00000065717.17	ENST00000587217.5	8.11658	-1.49253	1.00267	-1.48855	0.136606
ENSG00000065802.13	ENST00000473306.1	70.9609	-0.265254	0.319599	-0.82996	0.406562	0.584126
ENSG00000065809.14	ENST00000475858.1	31.5327	-0.047637	0.402347	-0.118398	0.905752	0.956587
ENSG00000065833.10	ENST00000901912.1	1027.45	0.397794	0.149566	2.65966	0.00782204	0.0285086
ENSG00000065882.19	ENST00000475531.1	26.6634	-0.282615	0.435105	-0.649532	0.515995	0.679026
ENSG00000065883.19	ENST00000465643.1	340.177	-0.444989	0.150936	-2.94819	0.00319642	0.0134794
ENSG00000065911.13	ENST00000677558.1	367.959	-0.400472	0.146105	-2.74098	0.00612564	0.0232369
ENSG00000065923.11	ENST00000491894.4	55.8035	0.192496	0.308588	0.623796	0.532762	0.69348
ENSG00000065970.10	ENST00000963778.1	253.449	-0.446091	0.177584	-2.512	0.012005	0.0404429
ENSG00000065978.20	ENST00000332220.10	4829.29	-0.628147	0.117886	-5.32845	9.90563e-08	1.29991e-06
ENSG00000065989.17	ENST00000590407.1	52.7115	0.222156	0.391711	0.567143	0.570617	0.723617
ENSG00000066027.13	ENST00000498123.5	231.944	0.932951	0.20888	4.46643	7.95341e-06	7.00102e-05
ENSG00000066032.19	ENST00000467488.1	3.11371	1.57756	2.97326	0.530583	0.595708
ENSG00000066044.16	ENST00000595499.1	109.618	-0.494618	0.215433	-2.29592	0.0216804	0.0655183
ENSG00000066056.16	ENST00000492874.1	7.05741	0.0696858	2.29924	0.0303082	0.975821
ENSG00000066084.14	ENST00000552328.1	57.3801	-0.67406	0.431663	-1.56154	0.118396	0.245755
ENSG00000066117.16	ENST00000549526.1	324.528	-0.465483	0.184557	-2.52216	0.0116637	0.0395345
ENSG00000066135.14	ENST00000472265.1	34.487	-0.303793	0.458182	-0.663041	0.507304	0.671743
ENSG00000066136.22	ENST00000483091.1	62.2941	-0.954401	0.311151	-3.06733	0.00215981	0.00969516
ENSG00000066230.12	ENST00000644203.1	317.708	-0.447116	0.208766	-2.1417	0.0322173	0.0901694
ENSG00000066248.16	ENST00000489127.1	11.03	0.370128	0.797315	0.464218	0.642491
ENSG00000066279.20	ENST00000679766.1	856.165	-0.34825	0.222356	-1.56618	0.117307	0.24418
ENSG00000066322.16	ENST00000855992.1	235.84	-0.471658	0.198562	-2.37537	0.0175312	0.0551379
ENSG00000066336.14	ENST00000713543.1	683.27	-0.501357	0.391173	-1.28167	0.199957	0.357555
ENSG00000066379.16	ENST00000932219.1	65.8173	-0.171069	0.356343	-0.480067	0.63118	0.770879
ENSG00000066382.18	ENST00000524667.5	177.505	0.717405	0.201371	3.5626	0.000367203	0.00211771
ENSG00000066422.8	ENST00000704114.1	311.812	-0.416529	0.191116	-2.17946	0.0292975	0.0835547
ENSG00000066427.26	ENST00000526872.3	166.155	0.467116	0.216905	2.15355	0.0312754	0.088115
ENSG00000066455.14	ENST00000555793.1	13.3069	-0.0245988	0.723577	-0.0339961	0.97288
ENSG00000066468.25	ENST00000467584.1	16.574	-0.0819345	0.576184	-0.142202	0.886921
ENSG00000066557.7	ENST00000920867.1	908.016	0.101059	0.179429	0.563224	0.573283	0.725648
ENSG00000066583.13	ENST00000954509.1	414.775	-0.507038	0.125485	-4.04062	5.33105e-05	0.000388505
ENSG00000066629.20	ENST00000553313.1	38.2856	-0.253128	0.38493	-0.657594	0.510799	0.674392
ENSG00000066651.21	ENST00000444229.1	493.398	1.53816	0.179333	8.57711	9.72871e-18	4.47336e-16
ENSG00000066654.15	ENST00000966612.1	468.705	-0.541902	0.141317	-3.83466	0.000125737	0.000835966
ENSG00000066697.16	ENST00000489377.1	111.171	-0.085759	0.250821	-0.341913	0.732416	0.843861
ENSG00000066735.17	ENST00000926957.1	448.295	-0.400478	0.220991	-1.8122	0.0699557	0.165098
ENSG00000066739.13	ENST00000555263.1	23.2621	-0.0566198	0.451863	-0.125303	0.900284
ENSG00000066777.10	ENST00000518290.1	119.563	-0.236554	0.24455	-0.967304	0.333392	0.510707
ENSG00000066813.15	ENST00000564855.1	1.9587	0.0696608	2.97589	0.0234084	0.981325
ENSG00000066827.17	ENST00000521673.5	253.039	-0.0205507	0.211738	-0.0970568	0.922681	0.966809
ENSG00000066855.17	ENST00000518352.1	230.013	0.0232512	0.176224	0.131941	0.895031	0.949606
ENSG00000066923.20	ENST00000479359.1	27.7582	-0.525645	1.39085	-0.377932	0.705481	0.825516
ENSG00000066926.14	ENST00000591977.5	96.6434	-0.0333708	0.313562	-0.106425	0.915245	0.962154
ENSG00000066933.18	ENST00000568781.1	102.977	0.273283	0.263268	1.03804	0.299252	0.474501
ENSG00000067057.20	ENST00000381072.5	492.117	-0.274553	0.13382	-2.05165	0.0402032	0.10753
ENSG00000067064.13	ENST00000381344.8	859.547	-0.239291	0.175415	-1.36414	0.172523	0.322036
ENSG00000067066.18	ENST00000494508.1	3.99749	0.727388	1.14433	0.635643	0.525009
ENSG00000067082.16	ENST00000461124.1	178.003	-0.505181	0.226589	-2.22951	0.0257802	0.0754359
ENSG00000067113.18	ENST00000502907.1	39.2222	0.263319	0.367855	0.715821	0.474102	0.64433
ENSG00000067141.18	ENST00000558886.1	105.919	-0.599006	0.239008	-2.50622	0.012203	0.0409744
ENSG00000067167.9	ENST00000884667.1	1293.19	-0.350163	0.183362	-1.90968	0.056174	0.139836
ENSG00000067177.16	ENST00000929439.1	1104.38	0.0825296	0.095182	0.867072	0.385903	0.563562
ENSG00000067182.10	ENST00000698337.1	154.472	-0.669008	0.235411	-2.84188	0.00448491	0.0179
ENSG00000067191.18	ENST00000582544.1	18.6938	0.0129571	0.56275	0.0230247	0.981631
ENSG00000067208.18	ENST00000492613.1	548.371	1.15604	0.178656	6.47077	9.7502e-11	2.05079e-09
ENSG00000067221.15	ENST00000561480.1	15.2099	-0.645982	0.630917	-1.02388	0.305892
ENSG00000067225.22	ENST00000565143.1	5353.95	-0.678692	0.148357	-4.57472	4.76851e-06	4.38891e-05
ENSG00000067248.12	ENST00000513447.1	62.579	-0.0794552	0.287986	-0.275899	0.782626	0.878126
ENSG00000067334.14	ENST00000496672.1	287.772	-0.45236	0.200935	-2.25127	0.0243683	0.0720812
ENSG00000067365.16	ENST00000569597.1	28.0609	0.0317453	0.409016	0.0776137	0.938135	0.975835
ENSG00000067369.15	ENST00000571145.1	150.331	-0.040344	0.202986	-0.198753	0.842456	0.917699
ENSG00000067445.23	ENST00000427099.1	123.333	-0.291397	0.213253	-1.36643	0.171803	0.321063
ENSG00000067533.7	ENST00000366932.4	869.752	-0.245406	0.148848	-1.6487	0.0992085	0.215438
ENSG00000067560.15	ENST00000265538.3	73.6901	-0.482843	0.388988	-1.24128	0.214502	0.375794
ENSG00000067596.13	ENST00000587574.1	338.783	-0.562688	0.161453	-3.48516	0.000491847	0.00272959
ENSG00000067606.18	ENST00000472017.1	61.2946	-0.171898	0.336647	-0.510617	0.609619	0.754315
ENSG00000067704.11	ENST00000488777.1	178.079	-0.612005	0.194622	-3.14458	0.00166324	0.00774647
ENSG00000067715.16	ENST00000704719.1	473.625	1.25422	0.16774	7.47721	7.59186e-14	2.31605e-12
ENSG00000067829.21	ENST00000454076.5	277.457	-0.414173	0.177323	-2.3357	0.0195066	0.0601448
ENSG00000067840.14	ENST00000468491.1	364.882	0.589256	0.433396	1.35963	0.173948	0.32389
ENSG00000067842.20	ENST00000705863.1	11.8243	-0.494598	0.727478	-0.67988	0.49658
ENSG00000067900.9	ENST00000584687.1	20.0575	-0.407206	0.470731	-0.865051	0.387011
ENSG00000067955.16	ENST00000568858.1	206.188	0.0317664	0.222326	0.142882	0.886383	0.944245
ENSG00000067992.18	ENST00000688031.1	228.759	-0.246076	0.16396	-1.50083	0.1334	0.268057
ENSG00000068024.19	ENST00000445704.1	35.8445	-0.498627	0.37221	-1.33964	0.180363	0.332529
ENSG00000068078.21	ENST00000469068.1	101.199	0.230197	0.34302	0.671088	0.502164	0.668149
ENSG00000068079.8	ENST00000546325.1	10.6785	-0.554618	1.24564	-0.445248	0.656141
ENSG00000068097.17	ENST00000587314.1	107.098	-0.0666565	0.207106	-0.321847	0.747569	0.854161
ENSG00000068120.15	ENST00000585909.1	388.506	-0.587422	0.208707	-2.81458	0.00488418	0.0192534
ENSG00000068137.16	ENST00000592974.5	28.7294	-0.251452	0.566406	-0.443942	0.657084	0.790139
ENSG00000068305.20	ENST00000561125.2	822.943	-0.333547	0.119593	-2.78902	0.00528671	0.0205671
ENSG00000068308.16	ENST00000481142.1	118.359	-0.112692	0.254879	-0.442139	0.658388	0.791133
ENSG00000068323.18	ENST00000481606.1	23.6496	0.0885662	0.526685	0.168158	0.866459
ENSG00000068354.17	ENST00000941579.1	369.319	-0.131345	0.144457	-0.909231	0.363228	0.540876
ENSG00000068366.22	ENST00000505855.1	132.675	0.425328	0.21665	1.96321	0.0496222	0.126774
ENSG00000068383.20	ENST00000498337.1	659.401	-0.0742844	0.22168	-0.335097	0.737552	0.847519
ENSG00000068394.12	ENST00000916259.1	163.575	-0.189728	0.1921	-0.987652	0.323323	0.500857
ENSG00000068400.15	ENST00000703885.1	11.9198	1.17925	0.715855	1.64733	0.0994894
ENSG00000068438.16	ENST00000466371.5	210.847	-0.413426	0.19163	-2.15741	0.0309734	0.0874144
ENSG00000068489.13	ENST00000582004.1	39.0907	-0.417213	0.35302	-1.18184	0.23727	0.403356
ENSG00000068615.21	ENST00000646181.1	64.3711	-0.298152	0.321966	-0.926038	0.354426	0.532355
ENSG00000068650.20	ENST00000614170.1	479.244	-0.6156	0.199427	-3.08684	0.00202295	0.00916612
ENSG00000068654.18	ENST00000471427.1	46.4242	-0.374888	0.37797	-0.991846	0.321273	0.498785
ENSG00000068697.8	ENST00000483117.1	305.765	-0.653437	0.177878	-3.67351	0.000239244	0.00146354
ENSG00000068724.19	ENST00000698499.1	23.6264	-0.0299917	0.464805	-0.0645255	0.948552
ENSG00000068745.16	ENST00000453202.1	122.374	-0.0937564	0.258377	-0.362867	0.716705	0.833383
ENSG00000068781.21	ENST00000470560.1	6.57217	1.52492	2.20898	0.690328	0.489988
ENSG00000068784.14	ENST00000475073.5	604.465	1.23597	0.198093	6.23934	4.39412e-10	8.49608e-09
ENSG00000068796.20	ENST00000509624.1	55.5993	-0.386399	0.343823	-1.12383	0.261085	0.431598
ENSG00000068878.16	ENST00000478731.1	72.8124	-0.176925	0.313678	-0.564035	0.572731	0.725214
ENSG00000068885.16	ENST00000484963.5	197.635	0.397784	0.20123	1.97677	0.0480682	0.12362
ENSG00000068903.22	ENST00000496069.1	15.5346	-0.387781	0.793805	-0.488509	0.625189
ENSG00000068912.16	ENST00000684835.1	181.392	-0.0413108	0.222252	-0.185874	0.852543	0.923128
ENSG00000068971.15	ENST00000532850.1	39.9669	0.487738	0.50268	0.970277	0.331909	0.50917
ENSG00000068976.15	ENST00000462303.1	69.2843	1.5059	2.02747	0.742745	0.457636	0.632019
ENSG00000069011.16	ENST00000265340.12	252.111	-0.692363	0.212911	-3.25189	0.00114641	0.00563782
ENSG00000069020.19	ENST00000485768.1	7.93659	-0.0490214	0.811465	-0.0604109	0.951828
ENSG00000069188.17	ENST00000392650.8	1206.4	0.367855	0.174262	2.11093	0.0347782	0.0958325
ENSG00000069206.15	ENST00000441335.6	2.94338	0.0696699	2.63893	0.0264008	0.978938
ENSG00000069248.13	ENST00000485119.1	115.063	-0.203736	0.331666	-0.614279	0.539031	0.698674
ENSG00000069275.14	ENST00000464938.1	455.326	-0.646117	0.171925	-3.75813	0.000171187	0.0010952
ENSG00000069329.20	ENST00000563884.1	141.652	-0.723045	0.211744	-3.41472	0.000638469	0.00342047
ENSG00000069345.13	ENST00000569553.1	57.8401	-0.462231	0.33574	-1.37675	0.168589	0.317124
ENSG00000069399.15	ENST00000477832.1	2.97321	-1.93518	1.48787	-1.30064	0.19338
ENSG00000069424.16	ENST00000671076.1	90.249	-0.572632	0.365927	-1.56488	0.117611	0.244693
ENSG00000069482.8	ENST00000933458.1	471.717	-0.395131	0.269779	-1.46465	0.143017	0.282096
ENSG00000069493.15	ENST00000487752.1	67.6711	0.324339	0.329359	0.98476	0.324742	0.502423
ENSG00000069509.7	ENST00000950132.1	182.263	-0.258587	0.190454	-1.35774	0.174545	0.324711
ENSG00000069535.15	ENST00000962443.1	5.95389	0.870753	1.0311	0.844492	0.398394
ENSG00000069667.16	ENST00000560300.1	1663.04	2.3764	0.104202	22.8057	4.02424e-115	1.50768e-111
ENSG00000069696.7	ENST00000528733.1	4.72432	1.08644	1.21627	0.893257	0.371719
ENSG00000069702.12	ENST00000529608.1	41.6152	-0.00509587	0.347486	-0.0146649	0.988299	0.993574
ENSG00000069812.12	ENST00000377834.8	63.8282	-0.137207	0.332676	-0.412435	0.680021	0.807702
ENSG00000069849.12	ENST00000484727.1	466.854	-0.287355	0.185603	-1.54822	0.121568	0.250489
ENSG00000069869.18	ENST00000508871.5	457.432	0.0866471	0.213443	0.40595	0.684779	0.811138
ENSG00000069943.11	ENST00000562751.1	17.5669	-0.903057	0.537455	-1.68025	0.0929091
ENSG00000069956.15	ENST00000955406.1	720.743	-0.209594	0.220064	-0.952423	0.340882	0.518585
ENSG00000069998.13	ENST00000486462.1	162.813	-0.500444	0.285462	-1.7531	0.079584	0.182377
ENSG00000070010.20	ENST00000474226.1	405.224	-0.421629	0.175148	-2.40727	0.0160724	0.0513285
ENSG00000070018.10	ENST00000540527.5	239.761	-0.273186	0.172665	-1.58217	0.11361	0.238475
ENSG00000070019.6	ENST00000535803.1	35.5389	0.0696631	2.09006	0.0333306	0.973411	0.986491
ENSG00000070031.4	ENST00000176195.4	4.36312	0.0696571	2.46041	0.0283111	0.977414
ENSG00000070047.14	ENST00000941193.1	815.581	0.133001	0.148559	0.895271	0.370642	0.547904
ENSG00000070061.17	ENST00000675370.1	92.9172	-0.390869	0.243119	-1.60773	0.107895	0.229247
ENSG00000070081.19	ENST00000527580.5	123.475	-0.231585	0.251069	-0.922398	0.356321	0.533881
ENSG00000070087.16	ENST00000423691.2	922.164	-0.516542	0.128256	-4.02743	5.63906e-05	0.000409107
ENSG00000070159.15	ENST00000447271.1	50.6112	-0.400901	0.372048	-1.07755	0.281234	0.454568
ENSG00000070182.22	ENST00000542694.2	4.82433	-0.701158	1.10104	-0.636816	0.524245
ENSG00000070193.6	ENST00000912799.1	2.74372	0.0696647	2.65034	0.0262852	0.97903
ENSG00000070214.18	ENST00000436716.1	296.259	-0.446168	0.233944	-1.90716	0.0565004	0.140479
ENSG00000070269.15	ENST00000555046.1	127.931	0.153683	0.217473	0.706679	0.479766	0.649132
ENSG00000070366.15	ENST00000574501.1	393.457	-0.5374	0.170807	-3.14623	0.00165388	0.00770824
ENSG00000070367.18	ENST00000554011.5	533.677	-0.0109407	0.192112	-0.0569495	0.954585	0.984852
ENSG00000070371.17	ENST00000458188.2	113.219	0.329088	0.299221	1.09982	0.271412	0.443484
ENSG00000070388.12	ENST00000591390.1	8.99562	1.66894	1.79635	0.929074	0.352851
ENSG00000070404.11	ENST00000605925.3	13.3958	-0.750957	0.718337	-1.04541	0.295833
ENSG00000070413.22	ENST00000467659.1	533.193	-0.164503	0.142351	-1.15562	0.247837	0.416322
ENSG00000070423.19	ENST00000586749.1	209.354	-0.529034	0.327895	-1.61342	0.106653	0.227221
ENSG00000070444.16	ENST00000573384.1	74.9303	-0.142697	0.276191	-0.516662	0.605392	0.750722
ENSG00000070476.16	ENST00000959114.1	1110.15	-0.104173	0.0965977	-1.07842	0.280848	0.454124
ENSG00000070495.16	ENST00000905303.1	703.431	-0.536636	0.150032	-3.5768	0.000347827	0.00202174
ENSG00000070501.13	ENST00000519094.5	30.9401	-0.448791	0.46273	-0.969876	0.332108	0.509376
ENSG00000070526.16	ENST00000585633.1	21.0082	-2.37207	1.88662	-1.25731	0.20864
ENSG00000070540.14	ENST00000590402.1	2.44909	0.871687	1.54467	0.564318	0.572538
ENSG00000070601.10	ENST00000359927.3	26.0825	-0.139091	0.651744	-0.213414	0.831004	0.91003
ENSG00000070610.15	ENST00000378088.1	98.5008	-0.0932081	0.241892	-0.385329	0.699994	0.821898
ENSG00000070614.16	ENST00000521752.1	43.005	-0.751706	0.441156	-1.70395	0.0883911	0.197575
ENSG00000070669.18	ENST00000487714.1	170.724	-0.596863	0.215941	-2.76401	0.00570959	0.021929
ENSG00000070718.14	ENST00000522320.1	38.9035	-0.0980749	0.346683	-0.282895	0.777257	0.874424
ENSG00000070729.14	ENST00000567568.1	6.17995	0.0696705	2.42674	0.0287095	0.977096
ENSG00000070731.12	ENST00000586520.5	35.7781	-0.135326	0.463276	-0.292108	0.770204	0.869619
ENSG00000070748.19	ENST00000638282.1	6.7422	-2.34646	2.15502	-1.08884	0.276226
ENSG00000070756.18	ENST00000519363.1	1922.31	-0.768054	0.138645	-5.53971	3.02968e-08	4.31789e-07
ENSG00000070759.18	ENST00000937751.1	2645.94	0.728342	0.100368	7.2567	3.96654e-13	1.10923e-11
ENSG00000070761.9	ENST00000562443.1	96.8188	-0.440527	0.267327	-1.64789	0.0993747	0.215689
ENSG00000070770.11	ENST00000676463.1	1149.84	-0.527372	0.124547	-4.23431	2.29257e-05	0.000182513
ENSG00000070778.14	ENST00000553531.1	20.1357	-0.856597	0.662663	-1.29266	0.196129
ENSG00000070785.18	ENST00000486491.1	277.41	0.615089	0.148761	4.13474	3.55351e-05	0.000269506
ENSG00000070808.18	ENST00000507995.1	56.0968	2.05221	1.63546	1.25482	0.209546	0.369509
ENSG00000070814.23	ENST00000506063.1	178.882	-0.374607	0.213614	-1.75366	0.0794881	0.182203
ENSG00000070831.19	ENST00000695862.1	1646.78	-0.462229	0.0826817	-5.59047	2.26456e-08	3.32001e-07
ENSG00000070882.14	ENST00000415952.1	4779.45	0.665463	0.120903	5.50408	3.71092e-08	5.21702e-07
ENSG00000070886.12	ENST00000166244.8	211.25	-0.17905	0.269754	-0.663751	0.50685	0.671395
ENSG00000070915.11	ENST00000569002.1	1.70531	0.0696234	3.55412	0.0195895	0.984371
ENSG00000070950.11	ENST00000427329.5	5207.77	1.03883	0.111963	9.27836	1.72103e-20	9.91144e-19
ENSG00000070961.18	ENST00000552275.1	75.3126	0.0975021	0.329443	0.29596	0.76726	0.867434
ENSG00000070985.14	ENST00000696290.1	21.6256	2.86746	1.59625	1.79637	0.0724353
ENSG00000071051.15	ENST00000899661.1	319.585	-0.252392	0.168595	-1.49704	0.134384	0.26948
ENSG00000071054.18	ENST00000477711.1	72.2774	-0.572786	0.348001	-1.64593	0.0997776	0.216366
ENSG00000071073.14	ENST00000495056.2	14.4321	-0.0207779	0.61762	-0.0336419	0.973163
ENSG00000071082.12	ENST00000409000.5	1013.41	-0.693688	0.115752	-5.99286	2.06183e-09	3.63782e-08
ENSG00000071127.19	ENST00000699793.1	445.272	-0.577918	0.138997	-4.15777	3.21366e-05	0.000246358
ENSG00000071189.22	ENST00000471744.1	339.738	0.512377	0.207598	2.46812	0.0135824	0.0447121
ENSG00000071205.13	ENST00000510379.1	524.843	1.01283	0.111327	9.09783	9.21513e-20	5.03958e-18
ENSG00000071242.14	ENST00000506565.1	2728.34	1.69997	0.112101	15.1646	6.06464e-52	2.02028e-49
ENSG00000071243.17	ENST00000497502.1	116.356	-0.350935	0.343611	-1.02131	0.307105	0.48336
ENSG00000071246.11	ENST00000554743.1	25.2482	-0.342682	0.521173	-0.657521	0.510846
ENSG00000071282.13	ENST00000470776.1	21.2286	0.229874	0.538109	0.427188	0.669243
ENSG00000071462.14	ENST00000855997.1	620.557	0.0772853	0.154036	0.501737	0.615853	0.759089
ENSG00000071537.15	ENST00000555923.1	31.4507	-0.124631	0.502301	-0.24812	0.804041	0.892188
ENSG00000071539.15	ENST00000508430.1	272.84	-0.355964	0.179454	-1.9836	0.047301	0.122049
ENSG00000071553.19	ENST00000484908.2	748.383	-0.581002	0.17641	-3.29347	0.000989573	0.00498753
ENSG00000071564.20	ENST00000587425.5	636.015	-0.351229	0.165119	-2.12712	0.0334101	0.0928786
ENSG00000071575.12	ENST00000483034.1	19.651	-0.361182	0.531858	-0.679095	0.497077
ENSG00000071626.18	ENST00000589874.2	610.682	-0.571516	0.186051	-3.07183	0.00212753	0.00957433
ENSG00000071655.19	ENST00000592965.2	1506.91	-0.177142	0.117807	-1.50367	0.132667	0.266935
ENSG00000071794.17	ENST00000481663.1	202.807	-0.411481	0.235808	-1.74499	0.0809875	0.184797
ENSG00000071909.19	ENST00000442690.1	727.237	1.6438	1.65979	0.990365	0.321996	0.499426
ENSG00000071967.13	ENST00000494587.1	46.3356	0.26259	0.347526	0.7556	0.449889	0.625667
ENSG00000072041.19	ENST00000551612.6	264.714	-0.693267	0.176757	-3.92215	8.77621e-05	0.000609965
ENSG00000072042.14	ENST00000556692.1	145.822	-0.369645	0.188601	-1.95993	0.050004	0.127546
ENSG00000072062.17	ENST00000587533.1	98.1739	-0.391277	0.318106	-1.23002	0.218689	0.380973
ENSG00000072071.18	ENST00000588677.1	45.4681	0.0594264	0.458279	0.129673	0.896825	0.950815
ENSG00000072080.12	ENST00000874738.1	11.2072	0.069676	2.19871	0.0316895	0.97472
ENSG00000072110.18	ENST00000556432.1	133.312	-0.857163	0.211622	-4.05044	5.11205e-05	0.000374289
ENSG00000072121.17	ENST00000557204.1	18.942	-0.066333	0.491968	-0.134832	0.892745
ENSG00000072133.13	ENST00000699863.1	146.297	0.491052	0.227503	2.15845	0.0308931	0.0872302
ENSG00000072134.17	ENST00000584954.1	14.9066	-0.340212	0.597399	-0.569489	0.569024
ENSG00000072135.14	ENST00000464576.1	44.8473	-0.267146	0.413982	-0.645309	0.518727	0.681335
ENSG00000072163.21	ENST00000410011.5	318.866	-0.0877224	0.363144	-0.241563	0.809118	0.895572
ENSG00000072195.15	ENST00000403148.6	33.4875	-0.555448	0.494137	-1.12408	0.26098	0.431479
ENSG00000072201.15	ENST00000513421.5	254.74	0.209393	0.686009	0.305233	0.760188	0.862695
ENSG00000072210.20	ENST00000573505.1	208.019	-0.163301	0.185364	-0.880974	0.378332	0.555772
ENSG00000072274.15	ENST00000698276.1	966.31	-0.498027	0.124304	-4.00651	6.16216e-05	0.00044359
ENSG00000072310.19	ENST00000577897.2	121.817	-0.279034	0.276345	-1.00973	0.312624	0.489352
ENSG00000072315.4	ENST00000262839.3	58.5987	0.0696572	2.06554	0.0337235	0.973098	0.986491
ENSG00000072364.14	ENST00000421773.1	166.163	-0.503165	0.210761	-2.38737	0.0169696	0.0536704
ENSG00000072401.16	ENST00000606483.1	68.9228	-0.211884	0.419745	-0.504793	0.613704	0.75728
ENSG00000072415.11	ENST00000677972.1	223.658	-0.0487058	0.185756	-0.262202	0.793165	0.885022
ENSG00000072422.18	ENST00000496237.1	14.8408	-0.504701	0.846516	-0.596209	0.551036
ENSG00000072501.20	ENST00000469129.1	477.377	-0.499776	0.131481	-3.80113	0.000144035	0.000944401
ENSG00000072506.15	ENST00000684251.1	263.384	-0.629505	0.229975	-2.73728	0.00619496	0.0234644
ENSG00000072518.24	ENST00000535116.1	50.3467	-0.543307	0.354524	-1.5325	0.1254	0.256182
ENSG00000072571.21	ENST00000932207.1	681.28	-0.202551	0.176724	-1.14614	0.251736	0.420711
ENSG00000072682.21	ENST00000481636.1	6.1841	0.0693084	6.12021	0.0113245	0.990965
ENSG00000072736.19	ENST00000562171.1	1117.18	0.6783	0.100799	6.72922	1.70571e-11	3.97701e-10
ENSG00000072756.19	ENST00000698416.1	175.217	0.0265819	0.215044	0.123612	0.901623	0.953894
ENSG00000072778.21	ENST00000578033.1	78.4922	0.386581	0.314043	1.23098	0.21833	0.380574
ENSG00000072786.14	ENST00000521322.1	19.741	-0.131441	0.648423	-0.202709	0.839362
ENSG00000072803.19	ENST00000518106.1	42.0527	-0.605183	0.398243	-1.51963	0.128604	0.260915
ENSG00000072818.13	ENST00000575415.1	19.0456	0.0696756	2.13171	0.0326854	0.973925
ENSG00000072832.15	ENST00000513911.5	13.3672	-0.162487	0.871431	-0.18646	0.852084
ENSG00000072840.14	ENST00000514919.1	11.6848	-0.311968	0.7881	-0.395848	0.692217
ENSG00000072849.12	ENST00000571971.1	164.677	-0.00509506	0.181812	-0.0280237	0.977643	0.987621
ENSG00000072858.13	ENST00000498152.1	0.659971	0.260646	3.06288	0.0850984	0.932183
ENSG00000072864.17	ENST00000576502.5	98.618	-0.065173	0.325925	-0.199963	0.841509	0.917157
ENSG00000072952.22	ENST00000526414.5	44.5736	-0.266223	1.07418	-0.247838	0.80426	0.892355
ENSG00000072954.8	ENST00000595452.1	58.1534	0.459536	0.377801	1.21634	0.223855	0.387138
ENSG00000072958.10	ENST00000592703.1	58.095	-0.572308	0.421165	-1.35887	0.174188	0.324213
ENSG00000073008.17	ENST00000706608.1	577.52	-0.140986	0.108717	-1.29682	0.194693	0.350939
ENSG00000073050.13	ENST00000598422.1	118.277	-0.4178	0.224326	-1.86247	0.0625375	0.152004
ENSG00000073060.18	ENST00000545305.1	373.037	-0.0845706	0.182535	-0.463312	0.643141	0.779866
ENSG00000073067.14	ENST00000415893.1	5.22571	-2.92249	2.14543	-1.36219	0.173137
ENSG00000073111.16	ENST00000468659.1	389.757	-0.743441	0.177162	-4.19639	2.71205e-05	0.000211893
ENSG00000073146.17	ENST00000354853.2	239.671	-2.95611	1.67654	-1.76322	0.077863	0.179333
ENSG00000073150.14	ENST00000159647.9	191.89	-0.315717	0.352221	-0.89636	0.37006	0.547349
ENSG00000073169.15	ENST00000380903.7	849.77	0.246555	0.128434	1.91971	0.0548949	0.137252
ENSG00000073282.14	ENST00000486398.1	373.055	1.17096	0.69429	1.68655	0.0916895	0.203119
ENSG00000073331.19	ENST00000505912.1	49.8946	-0.022543	0.386123	-0.058383	0.953444	0.984171
ENSG00000073417.16	ENST00000561105.1	22.1243	-0.726736	0.529002	-1.37379	0.169508
ENSG00000073464.14	ENST00000674959.1	2.77294	-1.14314	1.43054	-0.799102	0.424231
ENSG00000073536.19	ENST00000586869.5	451.562	-0.184992	0.14518	-1.27423	0.202582	0.360907
ENSG00000073578.19	ENST00000507266.1	76.53	-0.031254	0.306276	-0.102045	0.918721	0.964307
ENSG00000073584.21	ENST00000643378.1	638.838	-0.508531	0.142088	-3.57899	0.00034493	0.00200746
ENSG00000073598.6	ENST00000158009.6	2.13359	0.124136	2.61153	0.0475336	0.962088
ENSG00000073614.13	ENST00000540156.1	61.7334	-0.816811	0.325271	-2.51118	0.012033	0.0405206
ENSG00000073670.15	ENST00000587773.1	514.269	-0.306737	0.227739	-1.34688	0.178018	0.329334
ENSG00000073711.12	ENST00000872862.1	373.488	0.26107	0.201689	1.29442	0.195519	0.352093
ENSG00000073712.16	ENST00000555546.5	262.071	-0.33747	0.250337	-1.34807	0.177637	0.32884
ENSG00000073737.18	ENST00000450153.1	1.87046	0.0696524	2.88201	0.024168	0.980719
ENSG00000073754.6	ENST00000368174.5	2.33652	0.0693493	6.12021	0.0113312	0.990959
ENSG00000073756.13	ENST00000559627.1	16.5841	-0.652143	0.989988	-0.658738	0.510064
ENSG00000073792.17	ENST00000496495.1	145.519	-0.318692	0.229809	-1.38677	0.165512	0.31292
ENSG00000073803.15	ENST00000448876.5	211.091	-0.117509	0.177473	-0.662125	0.507891	0.672205
ENSG00000073849.17	ENST00000470633.1	229.253	-0.502126	0.159569	-3.14677	0.00165085	0.00769585
ENSG00000073861.4	ENST00000581328.1	112.603	-2.37344	1.78345	-1.33082	0.183249	0.336202
ENSG00000073910.23	ENST00000490410.1	3.75711	2.18231	1.27448	1.71231	0.0868394
ENSG00000073921.19	ENST00000534375.1	93.2903	-0.405061	0.242069	-1.67333	0.0942626	0.207299
ENSG00000073969.20	ENST00000706406.1	252.627	-0.482381	0.227817	-2.1174	0.0342259	0.0946379
ENSG00000074047.23	ENST00000418323.6	426.494	0.823182	0.198286	4.15149	3.30324e-05	0.000252454
ENSG00000074054.22	ENST00000491646.1	56.0286	-0.0714589	0.359442	-0.198805	0.842415	0.917681
ENSG00000074071.16	ENST00000890486.1	628.28	-0.657703	0.208508	-3.15433	0.00160866	0.00753114
ENSG00000074181.10	ENST00000597756.1	71.2517	-0.367877	0.404917	-0.908526	0.3636	0.541202
ENSG00000074201.10	ENST00000526009.5	507.73	-0.155001	0.165227	-0.938106	0.34819	0.526186
ENSG00000074211.14	ENST00000507028.1	397.45	0.656737	0.2206	2.97704	0.00291043	0.0124613
ENSG00000074219.15	ENST00000595233.1	21.2134	-0.640856	0.467151	-1.37184	0.170113
ENSG00000074266.24	ENST00000528250.1	41.6853	0.171376	0.425923	0.402364	0.687416	0.812994
ENSG00000074276.12	ENST00000508085.1	2.65118	0.0696628	3.00203	0.0232052	0.981487
ENSG00000074317.12	ENST00000862613.1	16.3675	-0.609957	0.685213	-0.890171	0.373374
ENSG00000074319.14	ENST00000540555.1	74.1944	-0.302213	0.307488	-0.982844	0.325684	0.50343
ENSG00000074356.18	ENST00000576523.1	189.33	-0.216322	0.227391	-0.951319	0.341443	0.519163
ENSG00000074370.20	ENST00000574202.1	128.158	1.50613	2.02401	0.744131	0.456797	0.631273
ENSG00000074410.15	ENST00000558287.1	16.8274	-0.635042	0.551221	-1.15206	0.249295
ENSG00000074416.17	ENST00000648300.1	2012.05	1.09603	0.145955	7.50937	5.94104e-14	1.83847e-12
ENSG00000074582.16	ENST00000493376.1	87.7699	-0.385174	0.343955	-1.11984	0.262783	0.433646
ENSG00000074590.14	ENST00000261402.7	288.393	-0.2238	0.161478	-1.38595	0.165762	0.313244
ENSG00000074603.20	ENST00000560665.1	197.804	0.343247	0.207649	1.65302	0.0983276	0.213971
ENSG00000074621.15	ENST00000505666.2	39.1608	-0.238047	0.373865	-0.636719	0.524308	0.686442
ENSG00000074657.15	ENST00000590442.1	60.989	-0.283889	0.373465	-0.760148	0.447166	0.623049
ENSG00000074695.7	ENST00000592562.1	87.7537	-0.416145	0.310798	-1.33895	0.180585	0.332805
ENSG00000074696.14	ENST00000561763.1	263.2	-0.407284	0.231948	-1.75593	0.0791011	0.181538
ENSG00000074706.15	ENST00000470622.1	25.2967	-0.3646	0.630135	-0.578607	0.562855
ENSG00000074755.16	ENST00000572699.1	196.877	0.320239	0.246539	1.29894	0.193965	0.350035
ENSG00000074771.4	ENST00000159060.3	4.84061	0.0795378	2.24458	0.0354355	0.971732
ENSG00000074800.17	ENST00000464920.2	9583.61	-0.561467	0.132932	-4.22371	2.40312e-05	0.00019029
ENSG00000074842.9	ENST00000908999.1	190.706	-0.393099	0.263611	-1.49121	0.135907	0.271692
ENSG00000074855.11	ENST00000600711.1	27.7691	-0.00550808	0.499445	-0.0110284	0.991201	0.995253
ENSG00000074935.15	ENST00000603722.1	94.3355	-0.502384	0.294432	-1.70628	0.0879555	0.196846
ENSG00000074964.18	ENST00000482359.1	5.71585	0.464175	0.982925	0.472238	0.636757
ENSG00000074966.13	ENST00000510457.1	101.08	0.134284	0.362665	0.37027	0.711182	0.829458
ENSG00000075035.11	ENST00000551734.1	1.72488	0.0696362	3.11222	0.0223751	0.982149
ENSG00000075043.22	ENST00000482957.1	50.6372	-0.529507	0.38487	-1.37581	0.168881	0.317532
ENSG00000075073.16	ENST00000373307.5	2.98454	-2.97467	2.71743	-1.09466	0.273665
ENSG00000075089.11	ENST00000550813.5	57.4895	-0.00584596	0.327238	-0.0178646	0.985747	0.992051
ENSG00000075131.11	ENST00000261881.9	414.757	-0.199099	0.142315	-1.399	0.161814	0.308185
ENSG00000075142.15	ENST00000472930.6	212.294	-0.472769	0.213827	-2.21099	0.0270367	0.078295
ENSG00000075151.24	ENST00000634778.1	182.103	0.24421	0.202288	1.20724	0.227339	0.39134
ENSG00000075188.10	ENST00000550459.1	33.6136	-0.6223	0.398717	-1.56076	0.118581	0.246022
ENSG00000075213.12	ENST00000922179.1	248.814	0.306286	0.193472	1.5831	0.113399	0.238109
ENSG00000075218.20	ENST00000491863.1	102.768	-0.295238	0.269535	-1.09536	0.273359	0.445704
ENSG00000075223.15	ENST00000475955.1	14.1358	-0.452526	0.832202	-0.543769	0.586601
ENSG00000075234.18	ENST00000475467.1	23.3158	-0.667924	0.49508	-1.34912	0.177298
ENSG00000075239.16	ENST00000534773.1	127.162	-0.381128	0.251109	-1.51778	0.129071	0.261601
ENSG00000075240.18	ENST00000408031.1	90.2527	0.0327355	0.351557	0.0931157	0.925812	0.96875
ENSG00000075275.18	ENST00000473624.2	275.727	-0.121663	0.185415	-0.656166	0.511717	0.675298
ENSG00000075290.8	ENST00000343737.6	10.6323	-1.70025	0.991963	-1.71402	0.0865247
ENSG00000075292.21	ENST00000491843.2	1196.2	0.413802	0.136716	3.02673	0.00247212	0.0108703
ENSG00000075303.14	ENST00000483810.1	4.79744	-0.622598	1.00293	-0.620782	0.534743
ENSG00000075336.13	ENST00000927808.1	156.226	-0.362668	0.193705	-1.87227	0.0611694	0.14949
ENSG00000075340.24	ENST00000456320.7	418.931	-0.187956	0.166801	-1.12682	0.259817	0.430197
ENSG00000075388.4	ENST00000168712.3	3.45008	0.0696572	2.57162	0.0270869	0.97839
ENSG00000075391.19	ENST00000463079.1	59.7384	-0.359722	0.344348	-1.04465	0.296186	0.471021
ENSG00000075399.15	ENST00000565452.1	1.41155	-1.84902	2.5391	-0.728221	0.466479
ENSG00000075407.20	ENST00000685332.1	1553.37	0.186147	0.175197	1.0625	0.288008	0.461924
ENSG00000075413.20	ENST00000555235.1	524.989	0.135052	0.135697	0.995244	0.319618	0.49721
ENSG00000075415.16	ENST00000551265.5	323.502	-0.514918	0.216068	-2.38313	0.017166	0.0541768
ENSG00000075420.14	ENST00000476794.1	245.88	0.823398	0.17235	4.77748	1.77507e-06	1.81302e-05
ENSG00000075426.13	ENST00000264716.9	233.751	-0.420749	0.190964	-2.20329	0.0275741	0.0795236
ENSG00000075429.9	ENST00000307139.4	23.2278	0.456646	1.01049	0.451903	0.651339
ENSG00000075461.7	ENST00000921465.1	56.5589	0.253528	0.532609	0.476011	0.634067	0.773094
ENSG00000075539.16	ENST00000502925.1	77.558	-0.557318	0.292592	-1.90476	0.0568111	0.141052
ENSG00000075568.18	ENST00000465767.1	81.6582	-0.160045	0.31857	-0.502384	0.615397	0.758671
ENSG00000075618.19	ENST00000473330.1	2241.56	-0.764398	0.184833	-4.13562	3.53998e-05	0.000268577
ENSG00000075624.18	ENST00000417101.2	6053.8	-0.708231	0.166928	-4.24273	2.20818e-05	0.000176303
ENSG00000075643.7	ENST00000588132.1	21.5907	0.194229	0.847552	0.229164	0.818741
ENSG00000075651.18	ENST00000463281.1	12.0407	-1.46782	0.757466	-1.9378	0.052648
ENSG00000075673.13	ENST00000911814.1	75.025	-0.331279	0.509879	-0.64972	0.515873	0.678912
ENSG00000075702.19	ENST00000680597.1	159.843	-0.0162853	0.244277	-0.0666676	0.946846	0.980596
ENSG00000075711.22	ENST00000434148.1	45.4729	0.0405446	0.378398	0.107148	0.914672	0.961745
ENSG00000075785.15	ENST00000674593.1	1685.41	-0.57516	0.136954	-4.19965	2.67329e-05	0.000209134
ENSG00000075826.18	ENST00000492667.5	82.8045	1.26912	0.260636	4.86932	1.11985e-06	1.18964e-05
ENSG00000075856.13	ENST00000547397.1	135.045	-0.495228	0.193089	-2.56476	0.0103247	0.035869
ENSG00000075886.11	ENST00000409047.2	0.925747	0.0696197	3.64392	0.0191057	0.984757
ENSG00000075891.25	ENST00000483202.2	6.14385	-0.71689	0.952507	-0.752635	0.451669
ENSG00000075914.14	ENST00000459856.1	32.2708	-0.216197	0.380782	-0.56777	0.570191	0.723341
ENSG00000075945.13	ENST00000474292.1	44.5817	0.333546	0.350389	0.951932	0.341131	0.518814
ENSG00000075975.18	ENST00000677008.1	149.711	-0.426076	0.185268	-2.29979	0.0214603	0.0649766
ENSG00000076003.6	ENST00000943623.1	1850.54	-0.259367	0.0892417	-2.90634	0.00365685	0.0150986
ENSG00000076043.12	ENST00000544507.1	82.2311	-0.298778	0.312376	-0.956469	0.338836	0.516514
ENSG00000076053.13	ENST00000538134.1	45.0781	-0.593859	0.333004	-1.78334	0.0745308	0.173339
ENSG00000076067.15	ENST00000262031.10	587.52	0.278976	0.133967	2.08242	0.0373044	0.101345
ENSG00000076201.17	ENST00000495653.1	56.5979	-0.692004	0.354501	-1.95205	0.0509323	0.129412
ENSG00000076242.19	ENST00000673741.1	61.1226	-0.214348	0.314301	-0.681983	0.49525	0.662566
ENSG00000076248.13	ENST00000540158.1	145.192	-0.2226	0.26674	-0.834521	0.403988	0.581501
ENSG00000076258.11	ENST00000480136.1	32.745	0.479654	0.527551	0.909208	0.36324	0.540891
ENSG00000076321.12	ENST00000488983.1	28.2932	0.1748	0.473237	0.369371	0.711851	0.830009
ENSG00000076344.17	ENST00000477143.5	7.6047	0.0512166	1.6422	0.0311877	0.97512
ENSG00000076351.14	ENST00000578217.1	91.7652	-0.470044	0.256526	-1.83234	0.0669002	0.159728
ENSG00000076356.8	ENST00000483048.1	125.212	-0.458152	0.240029	-1.90874	0.056296	0.140091
ENSG00000076513.18	ENST00000553246.1	101.991	-0.331566	0.258437	-1.28297	0.199503	0.356998
ENSG00000076554.17	ENST00000521618.1	89.4154	-0.215863	0.304558	-0.708773	0.478466	0.647914
ENSG00000076641.5	ENST00000523463.1	103.672	-0.346685	0.216397	-1.60208	0.109138	0.231306
ENSG00000076650.8	ENST00000590062.1	26.2097	-0.881485	0.514056	-1.71477	0.0863881	0.194228
ENSG00000076662.12	ENST00000589580.1	24.7836	-0.534526	1.43929	-0.371381	0.710354
ENSG00000076685.20	ENST00000469228.1	39.7969	-0.352654	0.391838	-0.900001	0.36812	0.545422
ENSG00000076706.18	ENST00000524940.5	41.2024	-0.339953	0.376142	-0.903789	0.366107	0.543572
ENSG00000076716.10	ENST00000887818.1	495.337	-0.132374	0.163814	-0.808071	0.41905	0.596519
ENSG00000076770.17	ENST00000538204.6	463.329	-0.291587	0.215195	-1.35499	0.175419	0.325776
ENSG00000076826.11	ENST00000593434.1	21.9696	-0.124888	0.532009	-0.234747	0.814405
ENSG00000076864.22	ENST00000464457.1	116.861	0.226338	0.405154	0.558648	0.576402	0.728093
ENSG00000076924.13	ENST00000600230.1	63.4784	-0.419827	0.338802	-1.23915	0.21529	0.376776
ENSG00000076928.21	ENST00000598444.1	25.381	1.93099	0.731964	2.6381	0.00833722
ENSG00000076944.18	ENST00000599278.1	17.918	0.145018	0.641219	0.22616	0.821077
ENSG00000076984.19	ENST00000494348.1	92.7746	-0.357577	0.31271	-1.14348	0.252841	0.422093
ENSG00000077009.15	ENST00000913549.1	4.80775	2.44497	2.09496	1.16707	0.243182
ENSG00000077044.12	ENST00000465569.1	28.0695	-0.194427	0.511437	-0.380158	0.703828	0.824403
ENSG00000077063.11	ENST00000487820.1	5.68982	-1.08693	1.00141	-1.0854	0.277746
ENSG00000077080.11	ENST00000487125.1	5.11169	1.53501	2.33137	0.658415	0.510272
ENSG00000077092.21	ENST00000689700.1	242.478	0.125491	0.161478	0.777137	0.437078	0.613926
ENSG00000077097.18	ENST00000699045.1	199.518	-0.423708	0.237346	-1.78519	0.0742307	0.172781
ENSG00000077147.17	ENST00000485093.1	438.55	-0.160948	0.159087	-1.0117	0.311684	0.488311
ENSG00000077150.22	ENST00000473400.1	51.1505	-0.177989	0.376463	-0.472792	0.636362	0.774845
ENSG00000077152.13	ENST00000934402.1	205.425	-0.271753	0.219122	-1.24019	0.214905	0.376286
ENSG00000077157.24	ENST00000464965.1	13.4676	0.351504	0.668654	0.525689	0.599104
ENSG00000077232.20	ENST00000640034.2	192.782	-0.390923	0.198734	-1.96707	0.0491753	0.12588
ENSG00000077235.19	ENST00000567843.1	163.509	-0.789864	0.212362	-3.71943	0.000199671	0.00125262
ENSG00000077238.15	ENST00000562968.1	2.84896	-1.64295	1.41361	-1.16224	0.245138
ENSG00000077254.15	ENST00000498328.1	63.7452	-0.266955	0.297833	-0.896322	0.370081	0.547367
ENSG00000077264.18	ENST00000484442.5	0.574839	1.0768	2.8584	0.376714	0.706386
ENSG00000077274.10	ENST00000932651.1	8.67917	-2.38709	1.93762	-1.23197	0.21796
ENSG00000077312.10	ENST00000596860.1	205.339	-0.727001	0.192229	-3.78196	0.000155601	0.00100961
ENSG00000077327.17	ENST00000435326.5	374.241	1.50779	2.01745	0.747374	0.454838	0.63036
ENSG00000077348.11	ENST00000688768.1	146.017	-0.290406	0.23257	-1.24868	0.211781	0.372363
ENSG00000077380.17	ENST00000479806.1	489.437	0.0771719	0.130981	0.589183	0.555739	0.711452
ENSG00000077454.18	ENST00000470184.1	45.3199	0.0107808	0.408313	0.0264032	0.978936	0.988412
ENSG00000077458.13	ENST00000535919.1	93.7539	-0.46359	0.302059	-1.53477	0.124841	0.255377
ENSG00000077463.16	ENST00000915977.1	149.55	0.297466	0.247555	1.20162	0.229512	0.394047
ENSG00000077522.16	ENST00000492101.1	6.70896	2.19826	1.20608	1.82265	0.0683562
ENSG00000077549.20	ENST00000674299.1	456.787	-0.662328	0.145017	-4.56724	4.94185e-06	4.53517e-05
ENSG00000077585.15	ENST00000477559.2	175.854	0.636333	0.177123	3.5926	0.000327394	0.00191933
ENSG00000077616.11	ENST00000532691.1	49.282	0.212413	0.394936	0.537841	0.590687	0.739741
ENSG00000077684.17	ENST00000887606.1	501.164	-0.227987	0.140367	-1.62422	0.104329	0.223601
ENSG00000077713.20	ENST00000484058.1	302.765	0.465335	0.16227	2.86766	0.00413522	0.0167282
ENSG00000077721.18	ENST00000625379.1	132.648	-0.53698	0.25391	-2.11484	0.0344432	0.0950894
ENSG00000077782.24	ENST00000526688.1	291.819	-0.634741	0.190045	-3.33995	0.000837945	0.00433524
ENSG00000077935.18	ENST00000923332.1	13.3698	-0.527107	1.10374	-0.477564	0.63296
ENSG00000077942.20	ENST00000484531.1	40.6218	-0.420208	0.352592	-1.19177	0.233352	0.398729
ENSG00000077943.9	ENST00000477064.1	8.06031	0.97234	0.979498	0.992692	0.32086
ENSG00000078018.23	ENST00000473543.1	1.50186	1.04186	2.18054	0.477798	0.632794
ENSG00000078043.17	ENST00000591865.1	18.8115	-0.0400468	0.5294	-0.0756457	0.939701
ENSG00000078053.18	ENST00000460887.1	6.94841	0.104796	0.914215	0.11463	0.908738
ENSG00000078061.15	ENST00000470206.1	209.684	-0.266674	0.243871	-1.0935	0.274172	0.446703
ENSG00000078070.15	ENST00000473955.1	16.7648	0.0114108	0.574496	0.0198622	0.984153
ENSG00000078081.9	ENST00000470251.1	7.86264	-0.0846176	0.83822	-0.100949	0.919591
ENSG00000078114.20	ENST00000485750.1	17.1494	0.659175	0.573663	1.14906	0.25053
ENSG00000078124.14	ENST00000680624.1	171.101	-0.639354	0.207545	-3.08056	0.00206615	0.00933602
ENSG00000078140.15	ENST00000510719.1	2759.42	1.31626	0.0796589	16.5237	2.47863e-61	1.1113e-58
ENSG00000078142.15	ENST00000590220.1	27.6718	-0.4643	0.456871	-1.01626	0.309504	0.485926
ENSG00000078177.16	ENST00000515550.1	394.025	0.908744	0.150227	6.04915	1.45612e-09	2.63597e-08
ENSG00000078269.15	ENST00000640569.1	23.024	0.0297516	0.549289	0.0541638	0.956805
ENSG00000078295.18	ENST00000484965.5	61.7164	0.0614066	1.21919	0.0503669	0.95983	0.986491
ENSG00000078304.21	ENST00000556570.5	176.821	0.100438	0.17965	0.559077	0.576109	0.727877
ENSG00000078328.23	ENST00000585867.2	646.277	2.30588	0.808652	2.85151	0.00435123	0.0174475
ENSG00000078369.20	ENST00000703698.1	1122.88	-0.622445	0.115077	-5.40895	6.33968e-08	8.59928e-07
ENSG00000078401.8	ENST00000877370.1	5.55648	-0.428254	1.39531	-0.306923	0.758902
ENSG00000078403.18	ENST00000420525.1	567.022	1.30189	0.147509	8.82586	1.08621e-18	5.47094e-17
ENSG00000078487.19	ENST00000479315.1	3.15903	-0.390519	1.5892	-0.245733	0.805889
ENSG00000078549.17	ENST00000705424.1	133.658	-0.473397	0.207944	-2.27656	0.0228123	0.0683125
ENSG00000078579.9	ENST00000180166.6	47.2371	-0.364269	1.18505	-0.307386	0.758549	0.86165
ENSG00000078589.14	ENST00000544091.1	9.98967	0.0694617	4.63251	0.0149944	0.988037
ENSG00000078618.24	ENST00000464385.1	168.072	-0.498404	0.26066	-1.91209	0.0558649	0.139234
ENSG00000078668.15	ENST00000885479.1	642.247	-0.274236	0.0991703	-2.76531	0.00568694	0.0218645
ENSG00000078674.21	ENST00000518985.1	116.432	-0.0763546	0.253574	-0.301114	0.763328	0.864788
ENSG00000078687.19	ENST00000592251.1	59.4917	-0.359386	0.319144	-1.12609	0.260126	0.430549
ENSG00000078699.22	ENST00000543126.1	113.67	-0.370675	0.226678	-1.63525	0.101996	0.219895
ENSG00000078725.14	ENST00000373964.2	205.15	-0.493335	0.356745	-1.38288	0.166703	0.314547
ENSG00000078747.18	ENST00000696976.1	555.283	0.590449	0.114857	5.14071	2.737e-07	3.28891e-06
ENSG00000078804.14	ENST00000962433.1	124.837	-0.62644	0.270978	-2.31178	0.02079	0.0633328
ENSG00000078808.21	ENST00000478938.1	203.508	-0.435355	0.234421	-1.85715	0.0632897	0.153349
ENSG00000078814.20	ENST00000456649.1	5.18265	1.07398	2.0854	0.515	0.606553
ENSG00000078898.8	ENST00000170150.4	156.753	0.0696584	2.05155	0.0339541	0.972914	0.986491
ENSG00000078900.17	ENST00000604566.1	63.4049	-0.866968	0.30405	-2.8514	0.00435278	0.0174521
ENSG00000078902.17	ENST00000528719.1	34.5735	-0.539836	0.46821	-1.15298	0.248919	0.417601
ENSG00000078967.14	ENST00000491770.1	32.4511	-0.0920191	0.457864	-0.200974	0.840719	0.916573
ENSG00000079101.18	ENST00000584046.1	1.61931	-0.0724942	2.29618	-0.0315717	0.974814
ENSG00000079102.19	ENST00000518449.5	316.801	0.963209	0.141311	6.81622	9.3464e-12	2.24208e-10
ENSG00000079112.11	ENST00000450165.6	49.7065	1.51298	2.07342	0.729702	0.465572	0.636757
ENSG00000079134.14	ENST00000577429.5	33.6321	-0.517219	0.511516	-1.01115	0.311945	0.488563
ENSG00000079150.19	ENST00000424785.7	97.7338	-0.134104	0.261543	-0.512744	0.608131	0.753008
ENSG00000079156.18	ENST00000477646.1	418.324	0.904366	0.132227	6.8395	7.94692e-12	1.91476e-10
ENSG00000079215.16	ENST00000679384.1	42.0128	-0.495277	0.411994	-1.20215	0.229306	0.393792
ENSG00000079246.17	ENST00000493706.1	365.942	-0.439049	0.18292	-2.40022	0.0163852	0.0521515
ENSG00000079257.8	ENST00000264265.4	88.3422	-0.402899	0.286342	-1.40706	0.159411	0.305287
ENSG00000079308.21	ENST00000495556.1	2.44718	0.0513371	1.63293	0.0314386	0.97492
ENSG00000079313.16	ENST00000587404.1	65.621	-0.274489	0.354432	-0.774448	0.438666	0.615429
ENSG00000079332.17	ENST00000477464.1	178.75	-0.563227	0.214347	-2.62764	0.00859786	0.0308726
ENSG00000079335.22	ENST00000455467.6	433.348	0.590445	0.130376	4.52878	5.93256e-06	5.35646e-05
ENSG00000079337.17	ENST00000476259.1	0.888644	0.0695996	3.81	0.0182676	0.985425
ENSG00000079387.16	ENST00000551358.1	47.24	-0.314542	0.385693	-0.815525	0.414772	0.592452
ENSG00000079432.10	ENST00000571033.1	175.225	-0.328249	0.261386	-1.2558	0.209187	0.369137
ENSG00000079459.15	ENST00000529521.1	549.66	-0.614012	0.144676	-4.24404	2.19528e-05	0.000175377
ENSG00000079462.9	ENST00000597333.1	104.83	-0.550633	0.277306	-1.98565	0.0470722	0.121583
ENSG00000079482.15	ENST00000681349.1	8.8686	0.0687286	0.745657	0.0921718	0.926562
ENSG00000079557.6	ENST00000853615.1	30.0188	0.0696647	2.08415	0.033426	0.973335	0.986491
ENSG00000079616.15	ENST00000689221.1	113.192	-0.308931	0.282148	-1.09493	0.273549	0.445944
ENSG00000079689.16	ENST00000968674.1	1.34154	-1.3592	3.09059	-0.439787	0.660091
ENSG00000079691.20	ENST00000461945.1	364.363	1.18194	0.172559	6.84947	7.41254e-12	1.789e-10
ENSG00000079739.18	ENST00000483707.1	30.5259	-0.334014	0.410667	-0.813345	0.41602	0.593702
ENSG00000079785.17	ENST00000459706.2	876.952	-0.248067	0.120598	-2.05697	0.0396891	0.10649
ENSG00000079805.20	ENST00000586130.1	86.9846	-0.650825	0.302442	-2.1519	0.031405	0.0884099
ENSG00000079819.21	ENST00000527423.5	391.016	0.0167948	0.163397	0.102785	0.918133	0.964035
ENSG00000079841.20	ENST00000370419.6	123.832	0.538691	0.256212	2.10252	0.035508	0.0974557
ENSG00000079931.16	ENST00000392401.3	191.322	-0.30355	0.238954	-1.27033	0.203967	0.362653
ENSG00000079950.15	ENST00000942368.1	1866.3	-0.176504	0.106811	-1.65248	0.0984358	0.214147
ENSG00000079999.15	ENST00000591039.1	74.4893	-0.386841	0.309944	-1.2481	0.211994	0.372626
ENSG00000080007.9	ENST00000464221.1	9.72927	0.0696664	2.19427	0.0317493	0.974672
ENSG00000080031.11	ENST00000586310.1	15.5602	-1.37533	2.12622	-0.64684	0.517736
ENSG00000080166.16	ENST00000490854.1	1.90797	0.73393	1.41167	0.519902	0.603132
ENSG00000080189.16	ENST00000424568.1	165.759	-0.0731797	0.204267	-0.358254	0.720153	0.835681
ENSG00000080200.10	ENST00000485253.1	184.039	-0.345101	0.197712	-1.74547	0.0809031	0.184668
ENSG00000080224.18	ENST00000470610.6	4188.4	1.60545	0.135564	11.8428	2.34528e-32	2.8269e-30
ENSG00000080293.11	ENST00000630739.2	1.35862	1.4607	6.11316	0.238944	0.811149
ENSG00000080298.17	ENST00000449190.5	2059.26	1.0433	0.149274	6.98916	2.76532e-12	6.95065e-11
ENSG00000080345.19	ENST00000444746.7	3391.49	-0.00999749	0.160672	-0.0622229	0.950385	0.982449
ENSG00000080371.7	ENST00000547246.1	65.1333	-0.139293	0.300983	-0.462794	0.643512	0.780168
ENSG00000080493.20	ENST00000638464.1	242.445	0.803652	0.190768	4.21272	2.52314e-05	0.000198958
ENSG00000080503.26	ENST00000635226.1	10.2266	-0.385009	0.725939	-0.530359	0.595863
ENSG00000080511.5	ENST00000587782.1	0.79298	1.46688	3.95006	0.371356	0.710373
ENSG00000080546.15	ENST00000523632.1	63.6001	-0.221964	0.267863	-0.828648	0.407304	0.584901
ENSG00000080561.15	ENST00000474517.1	23.1238	-0.714526	0.491635	-1.45337	0.146122
ENSG00000080572.15	ENST00000970294.1	5.4017	-0.98245	2.1666	-0.453452	0.650223
ENSG00000080573.7	ENST00000461214.1	9.48634	3.59751	1.88509	1.9084	0.056339
ENSG00000080603.18	ENST00000483083.3	9218.65	-0.343486	0.108352	-3.17008	0.00152395	0.00718658
ENSG00000080608.11	ENST00000469168.1	67.0736	-0.198879	0.344353	-0.577542	0.563573	0.717846
ENSG00000080644.17	ENST00000559080.1	1.50703	-0.306128	1.89016	-0.161958	0.871339
ENSG00000080709.17	ENST00000505491.1	198.196	0.0696299	2.04919	0.0339792	0.972894	0.986491
ENSG00000080802.22	ENST00000414802.5	1030.94	0.133943	0.192549	0.695629	0.486661	0.655052
ENSG00000080815.21	ENST00000697915.1	451.517	-0.573254	0.137413	-4.17175	3.02269e-05	0.000233199
ENSG00000080819.10	ENST00000515041.1	85.5639	-0.307668	0.257861	-1.19316	0.232808	0.398077
ENSG00000080822.18	ENST00000513873.1	370.363	-0.564244	0.196013	-2.8786	0.00399442	0.0162492
ENSG00000080823.24	ENST00000521249.1	47.9689	-0.0693738	0.394625	-0.175797	0.860454	0.928129
ENSG00000080824.20	ENST00000556554.1	2605.67	-0.54466	0.138796	-3.92419	8.70217e-05	0.000605274
ENSG00000080839.13	ENST00000527999.1	243.659	0.72121	0.168016	4.29252	1.76659e-05	0.000144001
ENSG00000080845.20	ENST00000479951.1	121.964	-0.314131	0.285745	-1.09934	0.271619	0.443731
ENSG00000080854.16	ENST00000564347.1	25.9585	0.622904	0.473651	1.31511	0.188472
ENSG00000080986.14	ENST00000574567.1	12.5109	0.438558	0.712797	0.615264	0.53838
ENSG00000081014.12	ENST00000561397.1	92.8046	-0.103574	0.313814	-0.330048	0.741363	0.850162
ENSG00000081019.15	ENST00000369581.2	52.0373	-0.278237	0.325591	-0.854558	0.392796	0.570123
ENSG00000081026.20	ENST00000477955.1	329.265	1.1939	0.225009	5.30602	1.12047e-07	1.45489e-06
ENSG00000081041.10	ENST00000510048.1	0.991548	-1.69185	2.76968	-0.610848	0.5413
ENSG00000081051.8	ENST00000506820.1	5.20242	0.069677	2.30214	0.0302662	0.975855
ENSG00000081052.14	ENST00000682098.1	7.56968	0.347603	1.04919	0.331307	0.740412
ENSG00000081059.21	ENST00000519238.1	133.458	-0.427984	0.236771	-1.80758	0.0706717	0.166402
ENSG00000081087.16	ENST00000477774.2	185.741	0.0394051	0.23191	0.169916	0.865077	0.931194
ENSG00000081138.14	ENST00000581601.1	27.3533	0.14775	0.447506	0.330163	0.741277	0.850119
ENSG00000081148.12	ENST00000193391.8	81.5952	0.795976	0.362647	2.19491	0.0281702	0.0808582
ENSG00000081154.12	ENST00000460231.5	1364.37	-0.18821	0.181747	-1.03556	0.300405	0.475735
ENSG00000081177.20	ENST00000465286.1	17.9506	-0.777877	0.560066	-1.3889	0.164863
ENSG00000081181.9	ENST00000557319.1	78.9069	-0.164927	0.307225	-0.536827	0.591387	0.740251
ENSG00000081189.18	ENST00000636061.1	12.1218	0.176859	0.732919	0.241308	0.809316
ENSG00000081237.23	ENST00000484135.1	2.96535	0.0696739	2.80044	0.0248796	0.980151
ENSG00000081248.13	ENST00000680051.1	6.21934	3.07086	1.95172	1.57341	0.115623
ENSG00000081277.13	ENST00000475988.1	4.49801	0.0696826	2.52211	0.0276287	0.977958
ENSG00000081307.16	ENST00000494112.1	77.9279	-0.146934	0.367759	-0.39954	0.689496	0.81451
ENSG00000081320.13	ENST00000714419.1	832.821	-0.136468	0.119496	-1.14203	0.253441	0.422816
ENSG00000081377.18	ENST00000463547.5	575.288	1.26278	0.120266	10.4999	8.64708e-26	7.37659e-24
ENSG00000081386.14	ENST00000472201.1	24.7386	-0.325116	0.579901	-0.56064	0.575043
ENSG00000081479.15	ENST00000493501.1	31.4206	0.137731	0.537493	0.256247	0.79776	0.888297
ENSG00000081665.15	ENST00000587822.1	36.4982	-0.00820636	0.426272	-0.0192515	0.984641	0.991405
ENSG00000081692.14	ENST00000465251.1	56.2361	-0.313365	0.397013	-0.789307	0.429933	0.607141
ENSG00000081721.13	ENST00000490591.1	69.1249	-0.419628	0.341905	-1.22732	0.219701	0.382175
ENSG00000081760.18	ENST00000398953.2	10.6992	-0.572891	0.668697	-0.856728	0.391595
ENSG00000081791.10	ENST00000508751.1	237.831	-0.288411	0.218842	-1.3179	0.187538	0.341704
ENSG00000081800.10	ENST00000539873.1	70.157	0.0696465	2.0694	0.0336554	0.973152	0.986491
ENSG00000081803.18	ENST00000951093.1	1513.18	0.718439	0.132763	5.41145	6.25176e-08	8.48802e-07
ENSG00000081818.4	ENST00000623478.1	10.0678	0.0743357	2.15237	0.0345367	0.972449
ENSG00000081870.13	ENST00000371376.1	229.756	-0.251737	0.183463	-1.37214	0.170021	0.319021
ENSG00000081913.15	ENST00000588953.1	50.418	-0.699879	0.32627	-2.14509	0.0319456	0.0895924
ENSG00000081923.16	ENST00000588255.1	1.4388	-0.93337	2.07116	-0.450651	0.652241
ENSG00000081985.15	ENST00000441640.4	7.29559	-0.668071	1.08504	-0.615709	0.538086
ENSG00000082014.17	ENST00000472789.1	36.6896	0.468338	0.623211	0.751492	0.452357	0.628064
ENSG00000082068.10	ENST00000505799.1	39.9975	0.131777	0.33723	0.390762	0.695973	0.81935
ENSG00000082126.19	ENST00000602867.1	46.2766	-0.352584	0.644281	-0.547251	0.584206	0.734454
ENSG00000082146.14	ENST00000415688.1	131.89	-0.574188	0.330025	-1.73983	0.0818889	0.186379
ENSG00000082153.19	ENST00000463310.1	376.051	-0.497672	0.142804	-3.48501	0.000492127	0.00273088
ENSG00000082175.16	ENST00000325455.10	193.317	0.00842377	0.220238	0.0382486	0.96949	0.986491
ENSG00000082196.22	ENST00000508434.1	23.4951	1.42877	0.547738	2.6085	0.00909401
ENSG00000082212.14	ENST00000591925.2	201.554	-0.353434	0.226586	-1.55982	0.118802	0.246341
ENSG00000082213.19	ENST00000504866.1	276.667	-0.306892	0.196503	-1.56177	0.118343	0.2457
ENSG00000082258.14	ENST00000452521.1	481.244	-0.131256	0.192446	-0.682038	0.495215	0.662537
ENSG00000082269.18	ENST00000505675.1	64.0843	0.294915	0.330973	0.891052	0.372901	0.550116
ENSG00000082293.13	ENST00000478620.2	8.65779	0.516415	0.669021	0.771897	0.440175
ENSG00000082397.19	ENST00000579951.2	119.895	-0.598632	0.298533	-2.00525	0.0449368	0.117384
ENSG00000082438.19	ENST00000474975.1	16.1128	-0.397141	0.613265	-0.647584	0.517254
ENSG00000082458.13	ENST00000496931.1	37.5714	0.0182556	0.367931	0.0496168	0.960428	0.986491
ENSG00000082482.15	ENST00000444842.7	119.8	0.0925883	0.246406	0.375756	0.707099	0.826618
ENSG00000082497.13	ENST00000946959.1	234.797	-0.471559	0.199064	-2.36889	0.0178417	0.0559377
ENSG00000082512.16	ENST00000473385.1	123.642	-0.238571	0.219023	-1.08925	0.276043	0.448819
ENSG00000082515.19	ENST00000518364.1	164.003	-0.394072	0.23751	-1.65918	0.097079	0.211905
ENSG00000082516.9	ENST00000522075.1	104.069	-0.52129	0.223318	-2.33429	0.0195803	0.0603265
ENSG00000082556.14	ENST00000524278.5	1.22005	0.0695789	4.36488	0.0159406	0.987282
ENSG00000082641.17	ENST00000581319.1	338.562	-0.61029	0.155865	-3.91551	9.02116e-05	0.000625157
ENSG00000082684.17	ENST00000451541.5	3.15655	0.0289651	2.50343	0.0115702	0.990769
ENSG00000082701.18	ENST00000677423.1	211.52	-0.57906	0.204147	-2.83648	0.00456141	0.0181526
ENSG00000082781.13	ENST00000460797.5	57.1305	-0.35711	0.324544	-1.10034	0.271182	0.443246
ENSG00000082805.22	ENST00000543263.2	1779.43	1.39419	0.112699	12.371	3.75143e-35	5.53098e-33
ENSG00000082898.20	ENST00000492182.6	673.985	-0.307917	0.18519	-1.6627	0.0963717	0.210736
ENSG00000082996.21	ENST00000493238.1	60.3887	-0.515397	0.383858	-1.34268	0.179376	0.331152
ENSG00000083067.27	ENST00000354500.6	1649.74	1.70072	0.324602	5.23939	1.61108e-07	2.02278e-06
ENSG00000083093.13	ENST00000697384.1	222.345	-0.165751	0.227275	-0.729296	0.465821	0.63696
ENSG00000083097.15	ENST00000481979.1	24.8236	0.126936	0.50265	0.252533	0.800629
ENSG00000083099.12	ENST00000517396.5	419.491	-0.55847	0.169864	-3.28774	0.00100994	0.00507185
ENSG00000083123.16	ENST00000491328.1	87.8576	-0.172319	0.277029	-0.622026	0.533925	0.694425
ENSG00000083168.12	ENST00000463961.1	120.62	-0.105448	0.250308	-0.421274	0.673555	0.802665
ENSG00000083223.19	ENST00000469004.1	22.3922	-0.11772	0.528906	-0.222573	0.823868
ENSG00000083290.21	ENST00000571454.2	41.9053	0.0867655	0.365847	0.237163	0.81253	0.89787
ENSG00000083307.13	ENST00000474338.1	0.957943	1.46815	3.73823	0.39274	0.694512
ENSG00000083312.20	ENST00000680111.1	1901.86	-0.333779	0.165089	-2.02181	0.0431963	0.113852
ENSG00000083444.18	ENST00000470133.1	79.379	-0.143994	0.298472	-0.482437	0.629496	0.769565
ENSG00000083454.24	ENST00000549063.1	55.6544	0.0530893	0.486434	0.10914	0.913092	0.960891
ENSG00000083520.16	ENST00000475871.1	371.608	-0.676627	0.205625	-3.2906	0.000999755	0.00502902
ENSG00000083535.17	ENST00000489797.1	307.423	0.0727082	0.173289	0.419577	0.674795	0.803579
ENSG00000083544.17	ENST00000484389.6	587.984	0.397861	0.150107	2.65052	0.0080368	0.0291395
ENSG00000083635.8	ENST00000379161.5	315.442	-0.102661	0.15512	-0.661815	0.50809	0.672282
ENSG00000083642.20	ENST00000474274.1	45.4009	-0.409109	0.579255	-0.706268	0.480021	0.649372
ENSG00000083720.14	ENST00000503374.1	15.436	-0.0715403	0.506853	-0.141146	0.887755
ENSG00000083750.14	ENST00000498762.1	69.6998	0.608056	0.341492	1.78059	0.0749801	0.174131
ENSG00000083782.8	ENST00000551767.1	26.3413	0.0696628	2.09058	0.0333223	0.973418	0.986491
ENSG00000083799.19	ENST00000563976.1	49.4694	-0.465623	0.351775	-1.32364	0.185623	0.339342
ENSG00000083812.14	ENST00000593925.1	301.63	-0.435094	0.216718	-2.00766	0.0446798	0.116862
ENSG00000083814.14	ENST00000599961.1	2.01839	0.0694076	6.12021	0.0113407	0.990952
ENSG00000083817.10	ENST00000896581.1	47.6001	-0.544627	0.336532	-1.61835	0.105587	0.225553
ENSG00000083828.16	ENST00000396154.7	216.896	0.106339	0.192569	0.552212	0.580803	0.731524
ENSG00000083844.11	ENST00000600531.5	54.3627	-0.659444	0.304115	-2.1684	0.0301282	0.0854957
ENSG00000083845.10	ENST00000599232.1	2419.52	-0.640138	0.160431	-3.99011	6.60418e-05	0.000471793
ENSG00000083857.16	ENST00000507662.1	81.336	-0.418982	0.29079	-1.44084	0.149629	0.291563
ENSG00000083896.14	ENST00000505251.1	79.8961	-0.632403	0.347535	-1.81968	0.0688075	0.162965
ENSG00000083937.10	ENST00000466696.1	53.1662	-0.265422	0.316893	-0.837579	0.402267	0.579657
ENSG00000084070.13	ENST00000487871.1	31.6309	-0.107238	0.399161	-0.268658	0.788193	0.881891
ENSG00000084072.18	ENST00000474804.5	254.434	-0.336617	0.182954	-1.8399	0.0657827	0.157769
ENSG00000084073.11	ENST00000474142.1	81.0813	-0.317609	0.257357	-1.23412	0.217159	0.379111
ENSG00000084090.15	ENST00000479456.1	1536.55	-0.552956	0.121746	-4.54187	5.57564e-06	5.06237e-05
ENSG00000084092.8	ENST00000904433.1	361.351	-0.261518	0.143688	-1.82005	0.0687519	0.162895
ENSG00000084093.20	ENST00000675341.1	825.055	-0.171421	0.145207	-1.18053	0.237791	0.404014
ENSG00000084110.12	ENST00000546579.1	14.3091	-0.467712	0.708426	-0.660213	0.509117
ENSG00000084112.16	ENST00000546433.5	364.958	-0.292676	0.165237	-1.77125	0.0765199	0.176985
ENSG00000084207.19	ENST00000498765.5	778.427	-0.541958	0.205328	-2.63948	0.00830344	0.0299716
ENSG00000084234.19	ENST00000525604.1	1748.79	-0.604633	0.0886688	-6.81901	9.16708e-12	2.20022e-10
ENSG00000084444.15	ENST00000540455.1	24.4728	-0.659548	0.59033	-1.11725	0.263886
ENSG00000084453.18	ENST00000422327.5	14.0445	0.424621	0.679596	0.624814	0.532093
ENSG00000084623.13	ENST00000483517.5	1532.89	-0.446401	0.0989373	-4.51196	6.42302e-06	5.75993e-05
ENSG00000084628.11	ENST00000528449.1	58.9508	-0.291374	0.353955	-0.823195	0.410397	0.588111
ENSG00000084636.19	ENST00000529928.1	44.5638	0.0637673	2.0327	0.0313707	0.974974	0.986644
ENSG00000084652.17	ENST00000867271.1	1622.93	-0.299831	0.114661	-2.61493	0.00892445	0.0318496
ENSG00000084674.15	ENST00000233242.5	1.66373	0.0696411	3.05076	0.0228275	0.981788
ENSG00000084676.17	ENST00000493773.1	17.8281	-0.389049	0.51796	-0.751118	0.452582
ENSG00000084710.15	ENST00000858650.1	251.54	0.156561	0.172699	0.906553	0.364643	0.542239
ENSG00000084731.16	ENST00000852054.1	275.263	-0.135252	0.179886	-0.751879	0.452124	0.627863
ENSG00000084733.12	ENST00000473035.1	1003.92	-0.0664808	0.137736	-0.482669	0.62933	0.769469
ENSG00000084734.10	ENST00000478147.1	2.71236	0.0696723	2.87907	0.0241996	0.980693
ENSG00000084754.13	ENST00000461025.1	156.38	-0.385412	0.21845	-1.76431	0.0776805	0.179004
ENSG00000084764.13	ENST00000879847.1	105.161	-0.214945	0.359518	-0.59787	0.549927	0.707141
ENSG00000085063.19	ENST00000651485.1	301.198	-0.549886	0.144268	-3.81156	0.00013809	0.000908974
ENSG00000085117.14	ENST00000524750.1	3.49064	-0.482014	1.70049	-0.283456	0.776827
ENSG00000085185.16	ENST00000441294.1	417.157	-0.477575	0.158219	-3.01844	0.00254083	0.011122
ENSG00000085224.23	ENST00000479487.1	51.8825	-0.0693021	0.392686	-0.176482	0.859915	0.927753
ENSG00000085265.13	ENST00000867921.1	67.9983	0.069658	2.06553	0.0337241	0.973097	0.986491
ENSG00000085274.17	ENST00000941310.1	248.313	-0.116304	0.171503	-0.678142	0.497682	0.664642
ENSG00000085276.19	ENST00000486748.2	2164.72	1.9917	0.10849	18.3584	2.82973e-75	2.81424e-72
ENSG00000085365.19	ENST00000506858.2	212.07	-0.252217	0.215533	-1.1702	0.24192	0.409038
ENSG00000085377.16	ENST00000448705.1	79.0766	-0.00724053	0.302849	-0.023908	0.980926	0.989482
ENSG00000085382.13	ENST00000369127.8	564.239	0.786393	0.184979	4.25125	2.12583e-05	0.000170385
ENSG00000085415.17	ENST00000590843.1	301.841	-0.432506	0.162414	-2.66299	0.00774499	0.0282893
ENSG00000085433.18	ENST00000934296.1	821.753	0.268889	0.1207	2.22775	0.0258972	0.0756882
ENSG00000085449.16	ENST00000462702.1	430.008	-0.445779	0.162652	-2.74068	0.00613115	0.0232545
ENSG00000085465.14	ENST00000494622.1	31.5655	-0.650895	0.721245	-0.902461	0.366812	0.544154
ENSG00000085491.18	ENST00000569674.1	53.4002	-0.50594	0.333311	-1.51792	0.129034	0.261543
ENSG00000085511.21	ENST00000539610.1	40.3042	0.0523292	0.398844	0.131202	0.895615	0.949905
ENSG00000085552.19	ENST00000493195.5	39.8167	-0.178271	0.48033	-0.371143	0.710531	0.82894
ENSG00000085563.16	ENST00000491360.1	55.3715	-0.0755526	0.330738	-0.228437	0.819307	0.902613
ENSG00000085644.15	ENST00000574928.5	206.287	-0.777028	0.213842	-3.63366	0.000279431	0.00167227
ENSG00000085662.15	ENST00000498373.1	218.417	-0.58681	0.239113	-2.45411	0.0141235	0.0461716
ENSG00000085719.14	ENST00000523588.1	57.1199	-0.318593	0.331335	-0.961544	0.336279	0.513854
ENSG00000085721.14	ENST00000874882.1	745.809	-0.00264014	0.100838	-0.026182	0.979112	0.98853
ENSG00000085733.17	ENST00000529736.5	550.284	-0.449409	0.173696	-2.58734	0.00967199	0.0339949
ENSG00000085741.15	ENST00000961028.1	295.621	-0.0523359	0.194565	-0.268989	0.787938	0.881686
ENSG00000085760.16	ENST00000441307.5	132.233	-0.164928	0.241614	-0.682608	0.494855	0.662228
ENSG00000085788.15	ENST00000528148.1	34.4598	-0.299123	0.487047	-0.614156	0.539112	0.698736
ENSG00000085831.17	ENST00000524442.1	10.7685	-0.221799	0.743369	-0.29837	0.765421
ENSG00000085832.19	ENST00000464478.5	100.25	0.657711	0.226767	2.90037	0.00372717	0.015338
ENSG00000085840.14	ENST00000959732.1	601.945	-0.00547558	0.135921	-0.0402849	0.967866	0.986491
ENSG00000085871.10	ENST00000502587.1	163.57	-0.0718515	0.222027	-0.323617	0.746228	0.853453
ENSG00000085872.16	ENST00000597261.1	183.799	-0.26932	0.223239	-1.20642	0.227655	0.39175
ENSG00000085978.23	ENST00000492298.5	108.539	0.102658	0.289931	0.354079	0.72328	0.83766
ENSG00000085982.17	ENST00000454354.1	40.6895	0.338232	0.38761	0.872611	0.382875	0.560381
ENSG00000085998.16	ENST00000475642.1	77.3757	-0.584948	0.384941	-1.51958	0.128617	0.260929
ENSG00000085999.14	ENST00000661174.1	237.958	0.0511387	0.20658	0.247549	0.804484	0.892522
ENSG00000086015.24	ENST00000492813.1	39.6937	-0.364781	0.466186	-0.78248	0.433933	0.610891
ENSG00000086061.17	ENST00000465677.1	257.927	-0.495743	0.183177	-2.70636	0.00680249	0.0253781
ENSG00000086062.15	ENST00000718311.1	766.713	-0.101092	0.127823	-0.790877	0.429016	0.606172
ENSG00000086065.15	ENST00000948351.1	301.753	-0.282314	0.143964	-1.96101	0.0498781	0.127326
ENSG00000086102.20	ENST00000463421.1	48.6572	0.0835288	0.364076	0.229426	0.818537	0.902114
ENSG00000086189.12	ENST00000514605.2	210.704	-0.504402	0.268153	-1.88102	0.0599687	0.147148
ENSG00000086200.18	ENST00000413749.2	204.142	0.931369	0.227327	4.09705	4.1844e-05	0.000312084
ENSG00000086232.14	ENST00000422786.1	911.82	-0.633353	0.17835	-3.55118	0.000383503	0.00220003
ENSG00000086288.12	ENST00000426106.1	2.63198	3.95745	2.3274	1.70037	0.0890607
ENSG00000086289.13	ENST00000199448.9	80.4474	-0.2713	0.230785	-1.17555	0.239774	0.406366
ENSG00000086300.18	ENST00000462993.1	25.7612	-0.414757	0.527266	-0.786618	0.431506
ENSG00000086475.16	ENST00000494329.1	224.357	-0.246355	0.188885	-1.30426	0.192144	0.347834
ENSG00000086506.3	ENST00000199708.3	9.79501	-1.4032	0.979914	-1.43196	0.152155
ENSG00000086544.4	ENST00000699490.1	114.021	-0.0569236	0.258855	-0.219905	0.825945	0.906875
ENSG00000086570.13	ENST00000520200.5	0.903495	0.0696069	3.75854	0.0185197	0.985224
ENSG00000086589.13	ENST00000520132.1	548.58	-0.47464	0.144877	-3.27615	0.00105231	0.0052485
ENSG00000086598.12	ENST00000544188.1	626.559	-0.604601	0.14425	-4.19133	2.77324e-05	0.000216131
ENSG00000086619.15	ENST00000691874.1	289.095	0.133438	0.193463	0.689736	0.49036	0.658205
ENSG00000086666.21	ENST00000561017.1	87.4926	-0.1681	0.282157	-0.595766	0.551331	0.708196
ENSG00000086696.12	ENST00000566213.1	10.4197	1.49687	2.18466	0.685174	0.493234
ENSG00000086712.14	ENST00000485153.1	1335.89	-0.424697	0.151884	-2.7962	0.00517071	0.0201924
ENSG00000086717.20	ENST00000496075.2	22.3907	0.0449011	0.849038	0.0528847	0.957824
ENSG00000086730.18	ENST00000361082.7	127.223	-0.930694	1.75155	-0.531355	0.595173	0.743005
ENSG00000086758.18	ENST00000474971.1	432.116	-0.535713	0.176304	-3.03857	0.00237706	0.0105159
ENSG00000086827.10	ENST00000535142.5	383.389	-0.0401887	0.153201	-0.262327	0.793069	0.884958
ENSG00000086848.16	ENST00000527294.5	85.9983	-0.286124	0.280162	-1.02128	0.30712	0.48336
ENSG00000086967.11	ENST00000597498.1	3.98766	3.21313	2.29871	1.3978	0.162174
ENSG00000086991.14	ENST00000393282.2	0.729737	1.6042	3.55979	0.450644	0.652246
ENSG00000087008.17	ENST00000508302.1	66.5695	0.00479769	0.28544	0.016808	0.98659	0.992545
ENSG00000087053.20	ENST00000675438.1	650.872	-0.457033	0.137625	-3.32085	0.000897453	0.00459815
ENSG00000087074.10	ENST00000704027.1	837.064	-0.651655	0.14193	-4.59137	4.40336e-06	4.07849e-05
ENSG00000087085.17	ENST00000651875.1	13.4919	0.175258	0.831812	0.210694	0.833126
ENSG00000087086.17	ENST00000853543.1	1147.06	-0.847605	0.142985	-5.92794	3.06751e-09	5.26152e-08
ENSG00000087087.21	ENST00000477529.1	335.321	-0.39768	0.222521	-1.78716	0.0739118	0.172211
ENSG00000087088.22	ENST00000515540.5	194.323	-0.49162	0.247655	-1.9851	0.0471333	0.121706
ENSG00000087095.14	ENST00000583517.1	270.656	-0.106467	0.149473	-0.71228	0.476292	0.646209
ENSG00000087116.18	ENST00000522937.1	13.487	0.253834	0.671245	0.378154	0.705316
ENSG00000087152.17	ENST00000591295.5	415.409	-0.383767	0.277296	-1.38396	0.166371	0.314094
ENSG00000087157.20	ENST00000586880.1	208.998	-0.115511	0.234191	-0.493233	0.621848	0.763845
ENSG00000087191.15	ENST00000579031.5	306.04	-0.572934	0.214094	-2.67609	0.00744877	0.0273965
ENSG00000087206.18	ENST00000510376.1	37.888	-0.18163	0.367659	-0.494018	0.621293	0.763393
ENSG00000087237.13	ENST00000569082.1	101.61	-2.3717	1.78735	-1.32693	0.18453	0.337887
ENSG00000087245.13	ENST00000566564.1	24.0194	-0.787756	0.484514	-1.62587	0.103978
ENSG00000087253.14	ENST00000566375.1	13.0338	-1.21041	0.693379	-1.74567	0.0808687
ENSG00000087258.18	ENST00000569295.6	4.06249	-2.44556	1.59105	-1.53707	0.124275
ENSG00000087263.18	ENST00000569645.1	75.9315	-0.162941	0.264742	-0.615469	0.538245	0.698082
ENSG00000087266.19	ENST00000504450.1	241.566	0.12794	0.278772	0.458941	0.646277	0.78197
ENSG00000087269.17	ENST00000507120.1	511.376	-0.409228	0.143879	-2.84425	0.00445164	0.0177888
ENSG00000087274.20	ENST00000538860.1	338.208	-0.679601	0.182443	-3.72501	0.000195306	0.00122862
ENSG00000087299.13	ENST00000555610.1	240.384	0.595753	0.200347	2.97361	0.00294321	0.0125788
ENSG00000087301.11	ENST00000557374.1	425.004	0.600891	0.161318	3.72489	0.000195404	0.00122906
ENSG00000087302.10	ENST00000553479.1	264.806	-0.748583	0.303644	-2.46533	0.0136885	0.0450094
ENSG00000087303.19	ENST00000553297.1	67.7728	-0.162458	0.314753	-0.516144	0.605754	0.751031
ENSG00000087338.6	ENST00000468386.2	158.704	0.621552	0.201277	3.08804	0.00201484	0.00913831
ENSG00000087365.17	ENST00000531041.1	260.169	-0.553576	0.221847	-2.49531	0.0125848	0.041991
ENSG00000087448.12	ENST00000381271.7	617.243	-0.28978	0.111045	-2.60957	0.0090657	0.0322616
ENSG00000087460.29	ENST00000656419.1	3496.69	-0.626562	0.103918	-6.0294	1.64573e-09	2.95592e-08
ENSG00000087470.22	ENST00000547640.1	202.377	-0.527321	0.197208	-2.67393	0.00749673	0.0275469
ENSG00000087494.17	ENST00000535992.5	7.70623	-0.183426	0.858766	-0.213593	0.830865
ENSG00000087495.18	ENST00000473657.1	2.59636	-1.97865	1.37493	-1.43909	0.150125
ENSG00000087502.20	ENST00000548098.1	62.4525	-0.42977	0.303027	-1.41826	0.156115	0.300798
ENSG00000087510.8	ENST00000882953.1	81.6259	-0.307888	0.319134	-0.96476	0.334665	0.512132
ENSG00000087586.19	ENST00000456249.5	190.924	-0.212657	0.191705	-1.10929	0.267304	0.438881
ENSG00000087589.18	ENST00000956166.1	52.4111	0.550254	0.426608	1.28983	0.197109	0.354213
ENSG00000087884.17	ENST00000529666.1	184.682	0.0871238	0.222882	0.390896	0.695874	0.819273
ENSG00000087903.14	ENST00000590822.1	178.091	1.04011	0.20199	5.14932	2.61434e-07	3.15635e-06
ENSG00000087995.17	ENST00000616852.1	517.391	0.0605928	0.123853	0.489231	0.624678	0.766158
ENSG00000088002.12	ENST00000201586.7	229.468	-0.680247	1.07088	-0.635224	0.525283	0.68727
ENSG00000088035.19	ENST00000650331.1	33.7158	-0.256064	0.390116	-0.65638	0.51158	0.675165
ENSG00000088038.21	ENST00000457463.1	627.947	-0.43265	0.173546	-2.49301	0.0126667	0.0422091
ENSG00000088179.10	ENST00000433888.5	540.226	0.74929	0.149176	5.02287	5.09049e-07	5.77758e-06
ENSG00000088205.14	ENST00000489933.1	100.512	-0.368063	0.226056	-1.62819	0.103484	0.222238
ENSG00000088256.9	ENST00000591301.1	58.4903	-0.686869	0.32242	-2.13036	0.0331423	0.0922636
ENSG00000088280.22	ENST00000484418.1	64.0104	0.127575	0.424408	0.300595	0.763724	0.865031
ENSG00000088298.14	ENST00000959814.1	332.718	0.170165	0.191718	0.88758	0.374767	0.552075
ENSG00000088305.20	ENST00000696245.1	356.249	-0.249118	0.165667	-1.50372	0.132652	0.266912
ENSG00000088325.17	ENST00000853953.1	2180.97	-0.408152	0.144926	-2.81627	0.00485842	0.0191676
ENSG00000088356.7	ENST00000902325.1	149.001	-0.176123	0.239429	-0.735595	0.461977	0.634751
ENSG00000088367.24	ENST00000479336.1	40.4633	-0.849402	0.419502	-2.02479	0.0428894	0.11322
ENSG00000088386.18	ENST00000376494.1	7.75438	0.0391005	1.65509	0.0236244	0.981152
ENSG00000088387.23	ENST00000473165.1	19.268	-0.246752	0.53399	-0.462092	0.644015
ENSG00000088448.15	ENST00000463156.1	159.957	0.0965107	0.199956	0.482659	0.629338	0.769472
ENSG00000088451.12	ENST00000953437.1	253.118	-0.0151056	0.175994	-0.0858302	0.931601	0.972192
ENSG00000088538.14	ENST00000924010.1	3737.42	1.35282	0.0942941	14.3469	1.11472e-46	2.80987e-44
ENSG00000088543.16	ENST00000960620.1	18.1674	-0.916581	0.580495	-1.57896	0.114345
ENSG00000088682.15	ENST00000569980.1	243.268	-0.470339	0.167021	-2.81605	0.00486179	0.0191792
ENSG00000088726.16	ENST00000480698.1	22.4185	0.0555124	2.10191	0.0264104	0.97893
ENSG00000088727.15	ENST00000489391.1	9.20608	1.51913	2.14198	0.70922	0.478188
ENSG00000088756.14	ENST00000583410.1	90.0759	0.950618	0.278644	3.41158	0.000645865	0.00345535
ENSG00000088766.13	ENST00000489345.5	304.452	0.390065	0.183556	2.12505	0.0335823	0.0932568
ENSG00000088808.19	ENST00000557744.1	30.1373	-0.092024	0.443005	-0.207727	0.835442	0.913099
ENSG00000088812.19	ENST00000446916.2	542.445	0.364152	0.110315	3.30101	0.000963385	0.00487756
ENSG00000088826.19	ENST00000466004.1	4.76366	-2.28324	1.58887	-1.43702	0.150711
ENSG00000088827.15	ENST00000419548.4	6.51151	0.069677	2.26247	0.0307969	0.975431
ENSG00000088832.19	ENST00000474657.6	1364.5	-0.55826	0.0956278	-5.83784	5.28819e-09	8.69951e-08
ENSG00000088836.15	ENST00000488544.1	10.0469	-0.0538093	0.756321	-0.0711461	0.943281
ENSG00000088854.14	ENST00000619760.1	43.0196	1.02398	0.341094	3.00205	0.00268164	0.0116395
ENSG00000088876.14	ENST00000465019.1	148.814	-0.316014	0.199228	-1.58619	0.112696	0.236972
ENSG00000088881.22	ENST00000481662.2	41.4551	0.422956	0.34993	1.20869	0.226783	0.39074
ENSG00000088882.9	ENST00000921882.1	141.71	-0.248145	0.225152	-1.10212	0.270408	0.442434
ENSG00000088888.19	ENST00000883971.1	358.575	-0.14397	0.209429	-0.687439	0.491806	0.65953
ENSG00000088899.17	ENST00000875482.1	131.471	-0.238467	0.294022	-0.81105	0.417337	0.594939
ENSG00000088930.9	ENST00000948643.1	1814.75	0.290292	0.112555	2.57912	0.0099053	0.034667
ENSG00000088970.17	ENST00000423272.1	15.0174	-0.0965639	0.74706	-0.129259	0.897153
ENSG00000088986.12	ENST00000550178.1	455.234	-0.794097	0.210996	-3.76356	0.000167512	0.00107569
ENSG00000088992.19	ENST00000549210.1	14.2421	-0.968948	0.615484	-1.57429	0.115421
ENSG00000089009.17	ENST00000548343.1	1760.7	-0.615428	0.0950224	-6.47666	9.37729e-11	1.97736e-09
ENSG00000089022.15	ENST00000547305.1	50.6589	-0.0926701	0.365437	-0.253587	0.799815	0.889631
ENSG00000089041.18	ENST00000535928.5	24.0994	2.10688	1.29778	1.62345	0.104494
ENSG00000089048.16	ENST00000874579.1	371.633	0.246236	0.195057	1.26238	0.206813	0.366393
ENSG00000089050.17	ENST00000337227.9	206.907	-0.549171	0.172895	-3.17633	0.0014915	0.00705373
ENSG00000089053.14	ENST00000535463.1	88.4802	0.0963808	0.27368	0.352166	0.724714	0.838685
ENSG00000089057.16	ENST00000949268.1	1049.79	0.0492071	0.10677	0.46087	0.644892	0.780972
ENSG00000089060.13	ENST00000548186.5	45.5573	0.197939	0.447066	0.44275	0.657946	0.790835
ENSG00000089063.17	ENST00000852465.1	698.54	-0.204559	0.128698	-1.58945	0.111959	0.235757
ENSG00000089091.18	ENST00000699608.1	93.871	0.368877	0.272553	1.35341	0.175924	0.326484
ENSG00000089094.21	ENST00000536036.1	120.259	-0.634465	0.273316	-2.32136	0.0202672	0.0620041
ENSG00000089116.4	ENST00000261731.4	1.66997	0.0696305	3.25126	0.0214165	0.982913
ENSG00000089123.17	ENST00000465381.5	899.477	0.796426	0.141811	5.61611	1.95302e-08	2.89461e-07
ENSG00000089127.15	ENST00000681194.1	2.43236	0.0696587	3.29567	0.0211364	0.983137
ENSG00000089154.12	ENST00000548132.1	167.018	-0.363617	0.268009	-1.35673	0.174866	0.325122
ENSG00000089157.17	ENST00000546564.5	4776.61	-0.629585	0.175139	-3.59477	0.000324679	0.00190476
ENSG00000089159.18	ENST00000552550.5	79.3138	-0.583025	0.330786	-1.76254	0.0779774	0.179532
ENSG00000089163.6	ENST00000536460.1	8.84716	1.05079	0.976423	1.07616	0.281855
ENSG00000089169.16	ENST00000546426.5	372.247	1.48503	0.71332	2.08185	0.0373562	0.101455
ENSG00000089177.21	ENST00000450176.1	67.1182	0.412688	0.34674	1.1902	0.233969	0.399474
ENSG00000089195.16	ENST00000493972.1	98.3713	-0.174405	0.363549	-0.479729	0.63142	0.77111
ENSG00000089199.11	ENST00000455042.1	1.25983	0.04874	2.72108	0.017912	0.985709
ENSG00000089220.6	ENST00000942724.1	1414.89	-0.616122	0.156594	-3.93453	8.33599e-05	0.000582694
ENSG00000089225.21	ENST00000526441.1	4.09061	0.0694379	6.12021	0.0113457	0.990948
ENSG00000089234.17	ENST00000871569.1	513.421	0.033913	0.113092	0.299871	0.764275	0.865422
ENSG00000089248.8	ENST00000546477.1	239.821	-0.625392	0.170569	-3.66651	0.000245881	0.00149817
ENSG00000089280.21	ENST00000487974.1	590.491	-0.161378	0.20384	-0.791689	0.428542	0.605675
ENSG00000089289.17	ENST00000943388.1	445.893	0.293662	0.120481	2.43742	0.0147925	0.0479945
ENSG00000089335.23	ENST00000509196.1	162.49	-0.353734	0.241636	-1.46391	0.143218	0.282363
ENSG00000089351.16	ENST00000603907.1	93.2183	-0.456074	0.290991	-1.56731	0.117041	0.243772
ENSG00000089486.18	ENST00000589890.1	78.697	-0.537418	0.31869	-1.68634	0.0917311	0.203184
ENSG00000089558.9	ENST00000264661.4	132.378	0.901489	0.841226	1.07164	0.283883	0.457395
ENSG00000089639.12	ENST00000586269.1	31.9143	0.264176	0.508409	0.519614	0.603333	0.749133
ENSG00000089682.19	ENST00000471079.1	86.9219	0.218264	0.271256	0.804644	0.421025	0.598434
ENSG00000089685.16	ENST00000590449.1	247.888	-0.579049	0.266288	-2.17452	0.029666	0.0844136
ENSG00000089692.10	ENST00000441671.6	153.193	1.05244	0.566179	1.85884	0.0630493	0.152918
ENSG00000089693.12	ENST00000541305.1	574.554	-0.700647	0.145174	-4.82626	1.39124e-06	1.45278e-05
ENSG00000089723.11	ENST00000203664.10	51.2645	-0.503148	0.326588	-1.54062	0.12341	0.253283
ENSG00000089737.20	ENST00000553400.1	194.369	-0.713134	0.237959	-2.99687	0.00272763	0.0118048
ENSG00000089775.13	ENST00000922511.1	66.2453	-0.122584	0.292672	-0.418844	0.67533	0.804013
ENSG00000089818.18	ENST00000640091.1	144.197	-0.34836	0.194303	-1.79286	0.0729946	0.170649
ENSG00000089847.14	ENST00000597689.5	31.5055	1.16583	0.493737	2.36124	0.0182141	0.0568503
ENSG00000089876.13	ENST00000415732.1	206.916	0.346236	0.171582	2.0179	0.0436014	0.11465
ENSG00000089902.11	ENST00000559597.1	49.4705	-0.237146	0.367589	-0.645138	0.518838	0.681419
ENSG00000089916.19	ENST00000556109.1	101.832	-0.278717	0.218774	-1.27399	0.202666	0.360996
ENSG00000090006.19	ENST00000595529.1	75.1948	0.635072	0.382302	1.66118	0.0966779	0.211228
ENSG00000090013.12	ENST00000601346.5	37.3189	-0.598076	0.376317	-1.58929	0.111996	0.235818
ENSG00000090020.12	ENST00000490329.1	103.845	-0.945059	0.279886	-3.37658	0.00073392	0.00386155
ENSG00000090054.17	ENST00000469778.1	174.62	-0.387093	0.207892	-1.86199	0.0626041	0.152085
ENSG00000090060.20	ENST00000554135.1	457.23	-0.378102	0.272849	-1.38575	0.165822	0.313323
ENSG00000090061.18	ENST00000555942.1	63.2983	-0.326778	0.373633	-0.874595	0.381794	0.559275
ENSG00000090238.13	ENST00000570099.5	59.6854	-0.117866	0.348199	-0.3385	0.734986	0.84571
ENSG00000090263.17	ENST00000496641.1	85.2778	-0.4475	0.350878	-1.27537	0.202177	0.360403
ENSG00000090273.15	ENST00000484772.1	128.004	-0.41485	0.232254	-1.78619	0.0740689	0.17249
ENSG00000090339.10	ENST00000592686.1	0.841112	-1.35711	3.64717	-0.3721	0.709819
ENSG00000090372.15	ENST00000601869.1	665.722	-0.482162	0.17941	-2.68748	0.00719934	0.0266194
ENSG00000090376.12	ENST00000545837.1	1.09507	0.560373	2.8236	0.198461	0.842685
ENSG00000090382.7	ENST00000548839.1	17.4918	0.069675	2.13338	0.0326594	0.973946
ENSG00000090432.8	ENST00000925240.1	274.804	-0.580959	0.253888	-2.28824	0.0221233	0.0666023
ENSG00000090447.13	ENST00000575672.1	91.6545	-0.64687	0.333978	-1.93687	0.0527617	0.133113
ENSG00000090470.15	ENST00000559051.1	12.8214	-0.353698	0.682409	-0.518309	0.604243
ENSG00000090487.12	ENST00000559199.5	468.266	-0.267756	0.147798	-1.81163	0.0700435	0.165271
ENSG00000090512.13	ENST00000488561.1	11.8262	0.0696797	2.16475	0.0321884	0.974322
ENSG00000090520.13	ENST00000679794.1	124.923	-0.373778	0.237468	-1.57402	0.115484	0.241413
ENSG00000090530.11	ENST00000482780.1	5.29289	-0.503891	1.03333	-0.487638	0.625806
ENSG00000090534.21	ENST00000477594.1	0.687375	-2.34976	3.09828	-0.758408	0.448207
ENSG00000090539.17	ENST00000486066.5	16.417	0.617394	1.43379	0.430604	0.666756
ENSG00000090554.14	ENST00000597914.1	4.66554	-0.715505	0.985266	-0.726205	0.467713
ENSG00000090565.18	ENST00000495663.1	133.226	1.53883	0.238878	6.44192	1.17968e-10	2.45537e-09
ENSG00000090581.12	ENST00000684100.1	117.386	0.0409967	0.286703	0.142993	0.886295	0.944205
ENSG00000090612.23	ENST00000546126.7	267.494	-0.282274	0.185377	-1.5227	0.127833	0.259798
ENSG00000090621.16	ENST00000492519.1	570.689	-0.553652	0.255603	-2.16607	0.0303062	0.0858958
ENSG00000090659.18	ENST00000315599.12	1.26376	0.0696122	4.10114	0.0169739	0.986457
ENSG00000090661.14	ENST00000599275.1	6.19141	-0.492968	1.16806	-0.422041	0.672995
ENSG00000090674.17	ENST00000602227.1	24.793	-0.593768	0.587362	-1.01091	0.312061
ENSG00000090686.17	ENST00000487880.2	157.777	0.523711	0.247544	2.11563	0.0343766	0.0949555
ENSG00000090776.7	ENST00000851101.1	199.425	-0.722253	0.205632	-3.51235	0.000444154	0.0024972
ENSG00000090857.15	ENST00000564563.1	254.706	-0.108114	0.191489	-0.564597	0.572348	0.724897
ENSG00000090861.18	ENST00000569825.2	321.401	-0.525108	0.186056	-2.82231	0.00476794	0.0188588
ENSG00000090863.13	ENST00000561942.1	159.204	-0.190988	0.235709	-0.81027	0.417785	0.595385
ENSG00000090889.13	ENST00000485406.1	85.4067	-0.0198374	0.263404	-0.0753115	0.939967	0.976698
ENSG00000090905.20	ENST00000568750.1	147.169	-0.26911	0.202046	-1.33192	0.182886	0.335725
ENSG00000090924.16	ENST00000600210.1	200.625	-0.28676	0.206496	-1.38869	0.164926	0.312183
ENSG00000090932.12	ENST00000205143.4	58.9123	-0.51214	0.39617	-1.29273	0.196105	0.352844
ENSG00000090989.19	ENST00000506936.1	36.899	-0.24603	0.353269	-0.696437	0.486155	0.654561
ENSG00000091009.9	ENST00000508019.1	90.0563	-0.12183	0.341845	-0.356389	0.72155	0.836499
ENSG00000091010.7	ENST00000646991.2	8.54153	0.0696611	2.17057	0.0320935	0.974398
ENSG00000091039.18	ENST00000548485.1	172.538	-0.528644	0.272897	-1.93716	0.0527258	0.133045
ENSG00000091073.21	ENST00000465488.1	17.1695	0.308655	0.714782	0.431817	0.665875
ENSG00000091106.20	ENST00000652197.2	12.2135	0.0696595	2.12681	0.0327531	0.973872
ENSG00000091127.15	ENST00000482157.1	542.591	0.458425	0.127235	3.60299	0.000314582	0.00185268
ENSG00000091128.13	ENST00000471677.5	7.25234	1.49577	2.20797	0.67744	0.498127
ENSG00000091129.23	ENST00000489800.1	28.1844	0.227193	0.477739	0.47556	0.634388	0.773343
ENSG00000091136.16	ENST00000676592.1	46.9111	-0.56665	0.393413	-1.44035	0.149769	0.291769
ENSG00000091137.15	ENST00000460748.1	2.20294	3.05805	2.67442	1.14345	0.252853
ENSG00000091140.16	ENST00000489184.1	193.057	-0.372571	0.288614	-1.2909	0.196739	0.353697
ENSG00000091157.15	ENST00000585754.1	28.6148	0.0583659	0.394843	0.14782	0.882484	0.941995
ENSG00000091164.14	ENST00000588615.1	8.85517	-0.456836	0.721937	-0.632792	0.526869
ENSG00000091181.20	ENST00000466722.1	1.50403	-1.38955	2.66766	-0.520885	0.602447
ENSG00000091262.18	ENST00000575728.1	9.90577	-0.268464	0.790481	-0.339621	0.734142
ENSG00000091317.9	ENST00000205636.4	599.527	-0.159032	0.128731	-1.23539	0.216687	0.378541
ENSG00000091428.19	ENST00000473182.2	12.8707	0.699757	0.563658	1.24146	0.214437
ENSG00000091436.18	ENST00000422149.1	374.762	0.837474	0.183367	4.56721	4.94263e-06	4.53573e-05
ENSG00000091482.9	ENST00000941554.1	9.85201	1.41487	1.02477	1.38068	0.167377
ENSG00000091483.9	ENST00000497042.1	83.0336	-0.344179	0.256219	-1.3433	0.179174	0.330889
ENSG00000091490.12	ENST00000514321.1	11.7232	0.41635	0.636624	0.653996	0.513114
ENSG00000091513.17	ENST00000493011.5	45.9437	1.03994	1.14013	0.912122	0.361705	0.539315
ENSG00000091527.18	ENST00000420115.6	1956.08	-0.512871	0.123994	-4.13627	3.53003e-05	0.000267919
ENSG00000091542.9	ENST00000490106.1	1124.47	-0.690681	0.158797	-4.34945	1.36479e-05	0.000114057
ENSG00000091583.12	ENST00000577982.1	3.16742	0.0696705	2.49436	0.0279312	0.977717
ENSG00000091592.17	ENST00000574406.1	61.269	-1.20995	0.357043	-3.3888	0.000701984	0.00371697
ENSG00000091622.16	ENST00000575201.2	28.18	0.125959	0.611513	0.205979	0.836807	0.914003
ENSG00000091651.10	ENST00000567000.2	277.786	0.0505221	0.165819	0.304683	0.760608	0.862988
ENSG00000091656.19	ENST00000522409.1	19.5824	-0.0349761	0.567265	-0.0616573	0.950836
ENSG00000091664.9	ENST00000534115.1	2.06621	0.0694533	5.01664	0.0138446	0.988954
ENSG00000091704.10	ENST00000491460.5	8.35056	0.0696757	2.3007	0.0302846	0.97584
ENSG00000091732.19	ENST00000480193.5	161.979	0.442491	0.208382	2.12346	0.0337151	0.0934985
ENSG00000091831.26	ENST00000446550.1	19.5458	0.0696693	2.11938	0.0328725	0.973776
ENSG00000091844.9	ENST00000914255.1	442.167	0.698858	0.147227	4.74682	2.06643e-06	2.07359e-05
ENSG00000091879.15	ENST00000629816.3	39.1984	-0.420644	0.432186	-0.973293	0.330408	0.507816
ENSG00000091947.11	ENST00000591162.1	193.613	0.536883	0.332154	1.61637	0.106014	0.226207
ENSG00000091972.20	ENST00000714211.1	9.1636	-2.37223	1.93529	-1.22577	0.220284
ENSG00000091986.17	ENST00000469554.1	6.77726	-0.0597437	0.938908	-0.063631	0.949264
ENSG00000092010.16	ENST00000559123.5	158.595	-0.726366	0.263504	-2.75657	0.0058411	0.022334
ENSG00000092020.12	ENST00000555614.5	150.737	0.498888	0.21408	2.33038	0.0197863	0.0608574
ENSG00000092036.20	ENST00000553420.1	49.0647	0.115873	0.341594	0.339211	0.734451	0.845278
ENSG00000092051.19	ENST00000553505.1	66.5507	0.0625011	2.02509	0.0308635	0.975378	0.986676
ENSG00000092054.15	ENST00000965958.1	30.1927	0.0715976	2.10556	0.034004	0.972874	0.986491
ENSG00000092067.7	ENST00000696121.1	6.52726	0.0696727	2.23524	0.0311701	0.975134
ENSG00000092068.21	ENST00000397310.6	159.394	-0.722689	0.23005	-3.14144	0.00168119	0.00781713
ENSG00000092094.12	ENST00000554915.1	77.997	-0.155566	0.258678	-0.601388	0.547582	0.705322
ENSG00000092098.19	ENST00000560631.1	21.8965	-0.668161	0.5204	-1.28394	0.199164
ENSG00000092108.23	ENST00000553278.1	129.415	-0.0429357	0.267759	-0.160352	0.872604	0.936382
ENSG00000092140.17	ENST00000552488.1	574.703	0.825774	0.153065	5.39493	6.8549e-08	9.26275e-07
ENSG00000092148.15	ENST00000556281.1	89.5447	-0.277934	0.267239	-1.04002	0.298331	0.473444
ENSG00000092199.20	ENST00000553444.1	2654.35	-0.626446	0.136866	-4.57709	4.7149e-06	4.34248e-05
ENSG00000092203.16	ENST00000463119.1	176.051	-0.683404	0.196975	-3.46949	0.000521441	0.00287025
ENSG00000092208.20	ENST00000525430.1	94.7406	-0.215734	0.239446	-0.900971	0.367604	0.544947
ENSG00000092330.20	ENST00000558510.1	36.8318	-0.767189	0.493436	-1.55479	0.119996	0.24822
ENSG00000092345.14	ENST00000454457.1	8.12081	-2.39749	2.11215	-1.13509	0.256336
ENSG00000092421.18	ENST00000503865.1	90.2798	-0.963315	0.326857	-2.9472	0.00320663	0.0135155
ENSG00000092439.16	ENST00000560516.1	130.283	0.286469	0.354366	0.808398	0.418862	0.596329
ENSG00000092445.13	ENST00000568490.1	163.315	-0.645903	0.278881	-2.31605	0.0205555	0.0627458
ENSG00000092470.13	ENST00000478130.1	238.421	-0.0791982	0.1491	-0.531174	0.595298	0.743023
ENSG00000092529.26	ENST00000673893.1	1.96952	-1.39535	2.94699	-0.473484	0.635868
ENSG00000092531.11	ENST00000563333.1	118.838	-0.0181278	0.228892	-0.0791978	0.936875	0.975151
ENSG00000092607.15	ENST00000207157.7	117.071	0.477484	0.285876	1.67025	0.0948701	0.20833
ENSG00000092621.14	ENST00000482968.1	768.268	-0.664793	0.19881	-3.34386	0.000826228	0.0042811
ENSG00000092758.19	ENST00000467819.5	51.7631	0.0268604	0.421445	0.063734	0.949182	0.981925
ENSG00000092820.20	ENST00000923501.1	2099.18	-0.141766	0.117368	-1.20787	0.227096	0.391077
ENSG00000092847.15	ENST00000931710.1	2691.77	-0.189185	0.0716266	-2.64128	0.00825944	0.0298325
ENSG00000092850.13	ENST00000922204.1	78.7875	-0.942331	0.671846	-1.4026	0.160736	0.307107
ENSG00000092853.15	ENST00000466308.1	130.349	-0.203812	0.215833	-0.944306	0.345013	0.522697
ENSG00000092871.18	ENST00000414419.6	339.962	0.916069	0.168066	5.45066	5.01831e-08	6.90765e-07
ENSG00000092931.13	ENST00000590393.1	178.569	-0.127497	0.259607	-0.491114	0.623346	0.765022
ENSG00000092964.18	ENST00000493789.6	185.681	-0.385617	0.225752	-1.70814	0.0876103	0.196234
ENSG00000092969.12	ENST00000479322.1	26.1444	0.117994	0.646097	0.182626	0.855092	0.924774
ENSG00000092978.12	ENST00000489246.6	47.2163	0.780014	0.336529	2.31782	0.0204591	0.0625037
ENSG00000093000.20	ENST00000469163.1	1095.21	-0.512834	0.111316	-4.607	4.0853e-06	3.81113e-05
ENSG00000093009.12	ENST00000455750.6	158.071	0.171344	0.235534	0.72747	0.466938	0.637811
ENSG00000093010.16	ENST00000493893.1	94.2119	-0.513183	0.275489	-1.86281	0.0624896	0.151911
ENSG00000093144.20	ENST00000488087.1	84.1265	-0.125034	0.329267	-0.379736	0.704142	0.824575
ENSG00000093167.19	ENST00000483306.2	32.3309	0.0835825	0.402779	0.207515	0.835608	0.913191
ENSG00000093217.12	ENST00000487569.1	50.9622	0.68848	0.310072	2.22039	0.0263924	0.0768339
ENSG00000094631.23	ENST00000697247.1	178.263	0.00798538	0.217888	0.0366491	0.970765	0.986491
ENSG00000094804.13	ENST00000648633.1	161.198	-0.307008	0.203463	-1.50892	0.13132	0.265008
ENSG00000094841.15	ENST00000373373.8	99.3761	0.34661	0.224333	1.54507	0.122329	0.251658
ENSG00000094880.12	ENST00000464806.1	197.767	-0.665758	0.187429	-3.55206	0.000382227	0.00219381
ENSG00000094914.15	ENST00000550033.5	290.608	-0.421565	0.182157	-2.3143	0.0206514	0.0629977
ENSG00000094916.17	ENST00000930392.1	6494.91	-0.494916	0.0826464	-5.98835	2.11977e-09	3.7302e-08
ENSG00000094975.15	ENST00000609685.1	32.5209	-0.897071	0.397553	-2.25648	0.0240405	0.0713319
ENSG00000095002.17	ENST00000918108.1	1362.59	0.154165	0.0991156	1.5554	0.11985	0.247984
ENSG00000095015.7	ENST00000469188.1	141.191	-0.291782	0.235708	-1.23789	0.215755	0.377344
ENSG00000095059.18	ENST00000593432.1	175.041	-0.19143	0.229441	-0.83433	0.404095	0.581628
ENSG00000095066.13	ENST00000589765.1	1606	-0.445823	0.170602	-2.61323	0.00896897	0.0319809
ENSG00000095110.10	ENST00000539878.5	4.30828	2.99808	2.15999	1.38801	0.165134
ENSG00000095139.16	ENST00000954507.1	2610.58	-0.454635	0.0961624	-4.72779	2.26981e-06	2.25763e-05
ENSG00000095203.16	ENST00000374557.4	280.854	0.0484978	0.250868	0.19332	0.846709	0.920673
ENSG00000095209.13	ENST00000434214.1	190.344	-0.175457	0.199542	-0.879298	0.37924	0.556662
ENSG00000095261.15	ENST00000476949.1	101.893	2.50721	1.78292	1.40624	0.159653	0.305625
ENSG00000095303.18	ENST00000426608.6	12.1857	-0.243813	1.1342	-0.214965	0.829795
ENSG00000095319.15	ENST00000467044.1	417.032	-0.256869	0.143869	-1.78543	0.0741909	0.172712
ENSG00000095321.19	ENST00000467343.1	34.3114	-0.8196	0.552489	-1.48347	0.13795	0.274629
ENSG00000095370.21	ENST00000484160.1	4.33882	0.6915	1.93699	0.356996	0.721095
ENSG00000095380.12	ENST00000480925.1	139.56	-0.935002	0.294378	-3.1762	0.00149219	0.00705627
ENSG00000095383.20	ENST00000375063.5	27.4543	-0.222446	0.532578	-0.417677	0.676183	0.804685
ENSG00000095397.19	ENST00000673697.1	22.2569	-0.487995	0.639267	-0.763368	0.445244
ENSG00000095485.19	ENST00000478047.1	399.26	-0.00773281	0.12313	-0.0628019	0.949924	0.982286
ENSG00000095539.17	ENST00000484128.2	53.9781	-0.589304	0.438884	-1.34273	0.179358	0.331124
ENSG00000095564.16	ENST00000476401.1	79.3093	-0.146297	0.316055	-0.462885	0.643447	0.780107
ENSG00000095574.13	ENST00000904857.1	652.135	-0.212249	0.159526	-1.3305	0.183354	0.336341
ENSG00000095585.19	ENST00000495266.2	140.154	1.05456	1.77353	0.594614	0.552101	0.708789
ENSG00000095587.10	ENST00000506028.2	28.1576	-0.525748	1.39896	-0.375813	0.707056	0.826617
ENSG00000095596.12	ENST00000622925.1	9.5435	-0.922239	0.859214	-1.07335	0.283113
ENSG00000095627.11	ENST00000695399.1	2.9331	-1.36182	2.69387	-0.505525	0.61319
ENSG00000095637.24	ENST00000472854.5	12.6756	-0.848541	0.788858	-1.07566	0.28208
ENSG00000095713.15	ENST00000436034.1	98.0036	-0.594519	0.736816	-0.806877	0.419738	0.597234
ENSG00000095739.12	ENST00000497699.1	219.908	-0.44287	0.177354	-2.4971	0.0125214	0.0418248
ENSG00000095752.7	ENST00000264563.7	145.108	1.38161	1.22489	1.12795	0.259343	0.429708
ENSG00000095777.18	ENST00000477691.2	10.8057	0.621736	0.722305	0.860767	0.389366
ENSG00000095787.27	ENST00000530865.5	475.927	-0.260677	0.144802	-1.80023	0.0718243	0.168523
ENSG00000095794.21	ENST00000489321.5	342.47	0.780774	0.161797	4.82564	1.39552e-06	1.45692e-05
ENSG00000095932.7	ENST00000586804.1	22.0191	0.0696721	2.10796	0.0330519	0.973633
ENSG00000095951.19	ENST00000484210.1	228.394	0.730522	0.196028	3.72663	0.000194058	0.00122172
ENSG00000095981.11	ENST00000437525.3	1.85031	0.0696604	2.92194	0.0238405	0.98098
ENSG00000096060.16	ENST00000542713.1	868.195	0.683633	0.125117	5.46395	4.65658e-08	6.43695e-07
ENSG00000096063.17	ENST00000502969.1	337.406	-0.335947	0.171706	-1.95652	0.0504034	0.128355
ENSG00000096070.20	ENST00000532538.1	88.1305	-0.314748	0.246021	-1.27935	0.200772	0.358572
ENSG00000096080.13	ENST00000890921.1	323.566	-0.295317	0.175509	-1.68263	0.0924463	0.204394
ENSG00000096088.17	ENST00000425343.6	17.9984	0.0696787	2.12981	0.0327159	0.973901
ENSG00000096092.7	ENST00000872509.1	95.7922	-0.363178	0.253992	-1.42988	0.152752	0.295971
ENSG00000096264.14	ENST00000373086.3	12.3854	0.0696719	2.20015	0.0316669	0.974738
ENSG00000096384.21	ENST00000371554.2	8102.84	-0.589333	0.0727492	-8.10089	5.45598e-16	2.02687e-14
ENSG00000096395.12	ENST00000266003.9	11.0177	0.0696765	2.21522	0.0314535	0.974908
ENSG00000096401.9	ENST00000371477.4	1236.91	-0.101019	0.137238	-0.736088	0.461677	0.634622
ENSG00000096433.12	ENST00000931640.1	1071.8	0.176786	0.122838	1.43918	0.150098	0.29225
ENSG00000096654.17	ENST00000683788.1	145.552	-0.416831	0.229436	-1.81676	0.0692536	0.163789
ENSG00000096696.17	ENST00000684395.1	768.518	-0.492812	0.138658	-3.55415	0.000379206	0.00217876
ENSG00000096717.13	ENST00000403579.1	959.417	-0.135018	0.176604	-0.764524	0.444555	0.620983
ENSG00000096746.19	ENST00000491200.5	1153.16	-0.164643	0.177792	-0.926045	0.354423	0.532355
ENSG00000096872.18	ENST00000494236.1	16.9973	0.376142	0.658801	0.57095	0.568034
ENSG00000096968.15	ENST00000487310.1	17.204	-0.203456	0.663206	-0.306777	0.759013
ENSG00000096996.16	ENST00000430026.7	289.586	0.0696594	2.04739	0.0340234	0.972858	0.986491
ENSG00000097007.21	ENST00000929255.1	2135.8	-0.0375163	0.108246	-0.346584	0.728904	0.841448
ENSG00000097021.22	ENST00000481175.1	143.778	-0.326044	0.229809	-1.41876	0.155969	0.30059
ENSG00000097033.16	ENST00000616170.4	1223.51	-0.161538	0.153775	-1.05048	0.293497	0.46815
ENSG00000097046.14	ENST00000897935.1	1421.69	-0.0433026	0.151813	-0.285237	0.775463	0.873214
ENSG00000097096.11	ENST00000341460.6	490.836	0.00339711	0.160634	0.0211482	0.983127	0.990581
ENSG00000099139.15	ENST00000455778.1	112.788	-0.435024	0.259977	-1.67332	0.0942643	0.2073
ENSG00000099194.7	ENST00000884320.1	8356.99	-0.601779	0.0642219	-9.37032	7.23127e-21	4.3276e-19
ENSG00000099203.8	ENST00000941053.1	75.3454	-0.617313	0.314591	-1.96227	0.0497306	0.127012
ENSG00000099204.23	ENST00000466400.1	97.3915	-0.442424	0.24975	-1.77147	0.0764831	0.176915
ENSG00000099219.16	ENST00000688283.1	167.793	-0.468322	0.229651	-2.03928	0.041422	0.110164
ENSG00000099246.20	ENST00000684457.1	214.765	-0.27505	0.230637	-1.19256	0.23304	0.398363
ENSG00000099250.19	ENST00000413802.1	40.946	-0.589811	0.399071	-1.47796	0.139419	0.2768
ENSG00000099256.20	ENST00000376376.3	17.4826	0.504695	0.627113	0.804791	0.420941
ENSG00000099260.13	ENST00000496843.1	6.51601	-1.36298	1.07619	-1.26648	0.20534
ENSG00000099282.11	ENST00000470508.1	28.9912	-0.305935	0.487975	-0.626949	0.530693	0.691672
ENSG00000099284.15	ENST00000677507.1	42.5577	-0.889234	0.366303	-2.42759	0.0151994	0.0490695
ENSG00000099290.18	ENST00000399339.6	662.022	0.00258595	0.111948	0.0230995	0.981571	0.989768
ENSG00000099308.14	ENST00000609076.1	17.9435	-1.23299	0.586916	-2.1008	0.0356585
ENSG00000099330.10	ENST00000602236.5	19.0299	-0.614343	0.597885	-1.02753	0.304173
ENSG00000099331.15	ENST00000593411.1	41.0976	0.0677833	0.369892	0.183251	0.854601	0.924494
ENSG00000099337.6	ENST00000588137.1	21.7817	2.08133	1.68463	1.23548	0.216652
ENSG00000099338.23	ENST00000492088.3	66.2574	-2.37172	1.79032	-1.32474	0.185256	0.338844
ENSG00000099341.13	ENST00000590331.1	420.808	-0.6707	0.185289	-3.61974	0.000294895	0.00175277
ENSG00000099364.18	ENST00000566320.2	524.433	-0.476976	0.203442	-2.34454	0.0190507	0.0589746
ENSG00000099365.12	ENST00000566211.1	43.4435	2.51511	1.80709	1.3918	0.163982	0.311032
ENSG00000099385.13	ENST00000215115.5	156.215	-0.467928	0.293718	-1.59312	0.111134	0.234455
ENSG00000099399.6	ENST00000378988.5	9.09474	-0.750708	0.892787	-0.840859	0.400427
ENSG00000099617.4	ENST00000215368.4	170.693	-0.118747	0.409368	-0.290073	0.771761	0.870662
ENSG00000099624.9	ENST00000614837.1	210.808	-0.681886	0.269694	-2.52837	0.0114595	0.0389718
ENSG00000099625.15	ENST00000589260.5	23.34	0.394125	0.664515	0.593102	0.553113
ENSG00000099783.14	ENST00000596295.1	965.194	-0.484469	0.122693	-3.94862	7.86036e-05	0.000552285
ENSG00000099785.12	ENST00000595213.1	129.534	0.0988711	0.381194	0.259372	0.795348	0.886546
ENSG00000099795.8	ENST00000215565.3	173.775	-0.324837	0.182981	-1.77525	0.0758568	0.175737
ENSG00000099797.16	ENST00000599101.5	429.457	-0.70774	0.221137	-3.20046	0.00137206	0.00656494
ENSG00000099804.10	ENST00000593036.4	67.8985	-0.48901	0.454464	-1.07602	0.28192	0.455291
ENSG00000099810.22	ENST00000584988.1	157.635	0.0431311	0.221811	0.19445	0.845824	0.920102
ENSG00000099814.18	ENST00000251181.8	58.9193	-0.64722	0.390281	-1.65834	0.097248	0.212189
ENSG00000099817.13	ENST00000586215.1	241.87	-0.338273	0.309293	-1.0937	0.274088	0.446584
ENSG00000099821.15	ENST00000592633.5	162.206	-0.86893	0.203561	-4.26866	1.96655e-05	0.000158721
ENSG00000099822.3	ENST00000251287.3	690.483	-0.314205	0.199673	-1.57359	0.115581	0.241564
ENSG00000099840.14	ENST00000497445.5	9.00525	0.592112	1.03657	0.571224	0.567848
ENSG00000099860.11	ENST00000904740.1	2251.02	-0.399866	0.213755	-1.87068	0.0613898	0.149869
ENSG00000099864.19	ENST00000587513.3	183.467	-0.552654	0.332798	-1.66063	0.0967882	0.211405
ENSG00000099866.17	ENST00000622449.2	1.96179	-1.36065	2.84469	-0.478312	0.632428
ENSG00000099869.8	ENST00000381363.4	3.37981	0.0696545	2.70799	0.0257218	0.979479
ENSG00000099875.17	ENST00000589441.5	350.912	-0.458061	0.237751	-1.92664	0.0540246	0.1356
ENSG00000099889.15	ENST00000495096.5	70.5894	0.247074	0.362327	0.681909	0.495296	0.662606
ENSG00000099899.17	ENST00000459644.1	93.2078	-0.41942	0.340485	-1.23183	0.218012	0.380253
ENSG00000099901.19	ENST00000486575.1	1002.52	-0.553734	0.151374	-3.65804	0.000254146	0.00154171
ENSG00000099904.17	ENST00000469212.5	91.1427	-0.230938	0.335531	-0.688277	0.491278	0.659045
ENSG00000099910.18	ENST00000423364.1	61.019	0.429586	0.338925	1.2675	0.204978	0.363936
ENSG00000099917.18	ENST00000436496.2	88.1582	-0.821767	0.305291	-2.69175	0.00710776	0.0263391
ENSG00000099937.12	ENST00000406799.1	28.3664	-1.37055	2.09575	-0.653967	0.513133	0.676416
ENSG00000099940.13	ENST00000215730.12	468.182	-0.289444	0.116049	-2.49415	0.0126258	0.0421032
ENSG00000099942.14	ENST00000894699.1	2518.05	-0.359396	0.0901305	-3.98751	6.67695e-05	0.00047627
ENSG00000099953.11	ENST00000460352.1	9.70045	-1.43753	0.92476	-1.55449	0.120067
ENSG00000099954.20	ENST00000355219.4	459.699	-0.372459	0.123542	-3.01483	0.00257123	0.0112323
ENSG00000099956.21	ENST00000642727.1	152.522	0.0836972	0.217405	0.384983	0.70025	0.82209
ENSG00000099958.16	ENST00000464034.5	16.5776	-0.988751	0.58097	-1.7019	0.0887744
ENSG00000099968.20	ENST00000479296.1	64.0679	0.0317819	0.307347	0.103407	0.91764	0.963745
ENSG00000099974.9	ENST00000897122.1	69.345	-0.161942	0.311192	-0.520393	0.60279	0.748757
ENSG00000099977.17	ENST00000430101.2	191.835	-0.773161	0.363787	-2.12531	0.0335607	0.0932083
ENSG00000099985.4	ENST00000403389.1	8.02161	0.0693044	6.12021	0.0113239	0.990965
ENSG00000099991.19	ENST00000459824.1	51.4928	-0.510307	0.437186	-1.16725	0.243108	0.410538
ENSG00000099992.17	ENST00000466666.5	20.7802	-0.106729	0.631788	-0.168932	0.86585
ENSG00000099994.12	ENST00000463101.1	23.3413	-0.669072	0.684732	-0.97713	0.328505
ENSG00000099995.20	ENST00000485618.1	879.091	-0.78291	0.201604	-3.8834	0.000103004	0.000704137
ENSG00000099999.16	ENST00000421022.1	24.654	0.489738	0.494183	0.991006	0.321683
ENSG00000100003.18	ENST00000485482.5	2.64314	-1.03575	1.79228	-0.577895	0.563335
ENSG00000100012.13	ENST00000435069.1	4.04518	1.57369	2.90315	0.542064	0.587775
ENSG00000100014.21	ENST00000472799.1	49.1692	-0.0996128	0.332763	-0.299351	0.764673	0.865729
ENSG00000100023.20	ENST00000462188.1	338.601	-0.313189	0.161969	-1.93363	0.0531586	0.133899
ENSG00000100024.16	ENST00000382760.2	32.1129	2.077	1.65321	1.25635	0.20899	0.368969
ENSG00000100027.17	ENST00000672036.2	105.875	1.05771	0.362216	2.92011	0.00349909	0.0145421
ENSG00000100028.13	ENST00000468770.1	400.435	-0.74828	0.183766	-4.07192	4.66265e-05	0.000344251
ENSG00000100029.19	ENST00000441668.5	314.757	-0.606931	0.205191	-2.95788	0.0030976	0.0131277
ENSG00000100030.16	ENST00000491588.1	245.77	0.0224959	0.172888	0.130119	0.896472	0.950598
ENSG00000100031.20	ENST00000490087.1	13.9013	0.259252	1.10183	0.235292	0.813982
ENSG00000100034.14	ENST00000407142.5	585.228	-0.159222	0.186635	-0.85312	0.393593	0.570919
ENSG00000100036.13	ENST00000451479.1	111.16	0.205471	0.28393	0.723669	0.469269	0.639861
ENSG00000100038.21	ENST00000470338.1	35.5847	0.185314	0.4554	0.406926	0.684062	0.810679
ENSG00000100053.10	ENST00000215855.7	18.5311	0.147584	0.503222	0.293278	0.769309
ENSG00000100056.13	ENST00000472073.1	266.711	-0.140782	0.202481	-0.695283	0.486878	0.655267
ENSG00000100065.16	ENST00000486118.1	14.719	-0.600924	0.638018	-0.94186	0.346264
ENSG00000100077.17	ENST00000455558.2	907.518	0.789774	0.137647	5.7377	9.59732e-09	1.51191e-07
ENSG00000100078.5	ENST00000927610.1	2.84065	0.0696681	2.96598	0.0234891	0.98126
ENSG00000100079.7	ENST00000416480.1	1.39717	0.069449	6.12021	0.0113475	0.990946
ENSG00000100083.21	ENST00000463672.1	82.5544	-0.237427	0.276543	-0.858552	0.390588	0.567917
ENSG00000100095.20	ENST00000483291.1	3.18084	0.0693838	6.12021	0.0113368	0.990955
ENSG00000100097.13	ENST00000464120.1	12.9315	-0.698292	0.882144	-0.791585	0.428603
ENSG00000100099.23	ENST00000479064.5	42.7733	-0.357811	0.350662	-1.02039	0.307545	0.483824
ENSG00000100100.15	ENST00000402249.7	8.46419	-0.592459	0.858575	-0.690049	0.490163
ENSG00000100104.14	ENST00000471799.1	30.8008	-0.913376	0.36327	-2.51432	0.0119263	0.0402347
ENSG00000100105.19	ENST00000215919.3	223.651	-0.515446	0.202412	-2.54652	0.0108803	0.0374194
ENSG00000100106.22	ENST00000331103.5	24.7806	-0.64533	0.537131	-1.20144	0.229581
ENSG00000100109.18	ENST00000481357.1	29.9398	-0.342801	0.399834	-0.857358	0.391247	0.568581
ENSG00000100122.8	ENST00000927865.1	2.52498	-2.52648	2.08984	-1.20894	0.226687
ENSG00000100124.16	ENST00000498417.5	155.878	-0.0625233	0.251153	-0.248945	0.803404	0.891846
ENSG00000100129.18	ENST00000482600.5	2133.52	-0.339592	0.11141	-3.04813	0.00230272	0.010241
ENSG00000100138.15	ENST00000648161.1	664.207	-0.570874	0.163155	-3.49897	0.000467052	0.00260953
ENSG00000100139.15	ENST00000402631.1	796.332	-0.35313	0.174313	-2.02584	0.0427811	0.113003
ENSG00000100142.17	ENST00000927752.1	285.579	-0.235217	0.18857	-1.24737	0.212261	0.372928
ENSG00000100150.21	ENST00000643075.1	16.135	0.0863295	0.662825	0.130245	0.896373
ENSG00000100151.17	ENST00000476157.5	29.6741	-0.192504	0.392115	-0.490937	0.623471	0.7651
ENSG00000100154.15	ENST00000397906.7	7536.11	1.85061	0.0726862	25.4603	5.42774e-143	4.01205e-139
ENSG00000100162.17	ENST00000460824.1	76.7487	-0.730264	0.35484	-2.05801	0.0395892	0.106269
ENSG00000100167.21	ENST00000644076.2	458.054	-0.556787	0.164367	-3.38747	0.000705412	0.00373274
ENSG00000100191.6	ENST00000266086.6	89.8877	-1.37304	2.05153	-0.669279	0.503317	0.668906
ENSG00000100196.12	ENST00000471268.1	52.3289	-0.624884	0.357978	-1.74559	0.0808818	0.184644
ENSG00000100197.24	ENST00000852656.1	7.80544	0.665448	0.9957	0.668321	0.503928
ENSG00000100201.23	ENST00000477112.1	640.467	-0.267104	0.11208	-2.38316	0.0171648	0.0541739
ENSG00000100206.12	ENST00000464842.1	4.43899	-1.89491	1.91187	-0.991129	0.321623
ENSG00000100207.21	ENST00000335626.8	1531.62	-0.0941184	0.0926067	-1.01632	0.309475	0.4859
ENSG00000100209.12	ENST00000485599.5	62.851	0.0737438	0.289856	0.254415	0.799175	0.889186
ENSG00000100211.13	ENST00000867955.1	114.761	-0.0589341	0.239971	-0.245589	0.806001	0.893512
ENSG00000100216.7	ENST00000915616.1	593.576	-0.629007	0.182747	-3.44196	0.000577523	0.00313809
ENSG00000100218.12	ENST00000452757.5	1.79112	-4.42913	2.5801	-1.71665	0.0860431
ENSG00000100219.18	ENST00000484256.1	193.121	-0.573796	0.191492	-2.99645	0.00273147	0.0118188
ENSG00000100220.13	ENST00000498434.1	50.886	-0.507576	0.373693	-1.35827	0.174378	0.324484
ENSG00000100221.12	ENST00000456626.1	56.2348	-0.401427	0.38454	-1.04392	0.296525	0.47143
ENSG00000100225.19	ENST00000465418.1	97.1905	-0.569531	0.226638	-2.51295	0.0119726	0.0403553
ENSG00000100226.17	ENST00000475959.1	68.6386	-0.0849047	0.297507	-0.285387	0.775348	0.873148
ENSG00000100228.15	ENST00000857886.1	174.375	-0.227461	0.221188	-1.02836	0.303781	0.47951
ENSG00000100234.13	ENST00000908983.1	2053.98	-0.333291	0.0869918	-3.8313	0.00012747	0.000846134
ENSG00000100239.17	ENST00000473283.1	45.9239	-0.0453234	0.408157	-0.111044	0.911581	0.960051
ENSG00000100241.23	ENST00000685239.1	192.151	-0.480754	0.232098	-2.07134	0.0383269	0.10351
ENSG00000100246.14	ENST00000964354.1	49.8045	-0.797413	0.396483	-2.01122	0.0443025	0.116077
ENSG00000100249.5	ENST00000216071.5	3.18544	0.069676	2.59131	0.0268884	0.978549
ENSG00000100258.19	ENST00000505981.5	200.577	-0.386374	0.228073	-1.69408	0.0902501	0.200735
ENSG00000100263.15	ENST00000406335.1	115.878	-0.197034	0.359724	-0.547735	0.583874	0.73413
ENSG00000100266.20	ENST00000445706.5	969.815	1.17852	0.108525	10.8594	1.799e-27	1.66109e-25
ENSG00000100271.18	ENST00000903481.1	52.4551	0.240718	0.36303	0.663079	0.50728	0.671714
ENSG00000100276.11	ENST00000942941.1	9.62829	-1.64427	0.795098	-2.068	0.0386397
ENSG00000100280.18	ENST00000482818.1	402.466	-0.486777	0.268968	-1.8098	0.0703273	0.165765
ENSG00000100281.15	ENST00000455359.5	164.22	-0.110197	0.201525	-0.546816	0.584505	0.734739
ENSG00000100284.23	ENST00000497448.1	21.8856	-0.69847	0.600284	-1.16357	0.2446
ENSG00000100285.10	ENST00000310624.7	41.5919	-1.37076	2.08792	-0.656519	0.51149	0.675072
ENSG00000100288.21	ENST00000465842.1	103.691	0.849192	0.243511	3.48728	0.000487956	0.00271071
ENSG00000100290.4	ENST00000956707.1	59.0381	-0.539302	0.539959	-0.998785	0.317899	0.495315
ENSG00000100292.18	ENST00000412893.5	33.275	-0.67335	0.582617	-1.15573	0.24779	0.416263
ENSG00000100294.14	ENST00000464244.1	36.4293	-0.028671	0.430981	-0.066525	0.94696	0.980613
ENSG00000100297.17	ENST00000416905.1	436.857	-0.338946	0.151101	-2.24317	0.0248859	0.0732675
ENSG00000100299.19	ENST00000551731.1	23.9143	0.794007	0.552073	1.43823	0.150369
ENSG00000100300.19	ENST00000864342.1	83.6673	-0.516811	0.43003	-1.2018	0.22944	0.393955
ENSG00000100302.8	ENST00000885872.1	66.5704	-0.256796	0.550912	-0.466129	0.641123	0.778286
ENSG00000100304.13	ENST00000484711.1	656.707	-0.650736	0.205391	-3.16828	0.00153345	0.00722587
ENSG00000100307.14	ENST00000482294.1	139.876	0.399973	0.400646	0.99832	0.318124	0.495534
ENSG00000100311.18	ENST00000921092.1	431.917	-0.217838	0.559772	-0.389154	0.697162	0.819982
ENSG00000100312.11	ENST00000527761.1	2.70954	-0.542089	1.69047	-0.320673	0.748458
ENSG00000100314.5	ENST00000952608.1	59.0666	0.0370997	0.800094	0.0463692	0.963016	0.986491
ENSG00000100316.17	ENST00000471290.1	2493.18	-0.616731	0.152218	-4.05163	5.08622e-05	0.000372638
ENSG00000100319.14	ENST00000890558.1	115.908	-0.52951	0.239718	-2.20889	0.0271824	0.0786401
ENSG00000100320.25	ENST00000463509.1	152.429	-0.0337755	0.17645	-0.191417	0.848199	0.920737
ENSG00000100321.16	ENST00000489206.1	1161.49	0.198363	0.150011	1.32233	0.186059	0.339888
ENSG00000100324.15	ENST00000473491.1	151.677	-0.307682	0.235394	-1.30709	0.191182	0.346569
ENSG00000100325.16	ENST00000477074.1	49.0211	-0.317135	0.307267	-1.03211	0.302018	0.477476
ENSG00000100330.17	ENST00000480776.1	19.7561	-0.544558	0.557038	-0.977595	0.328275
ENSG00000100335.16	ENST00000962962.1	476.894	-0.395458	0.195969	-2.01796	0.0435957	0.114636
ENSG00000100336.19	ENST00000480236.2	16.2631	0.0696174	2.82073	0.0246807	0.98031
ENSG00000100344.12	ENST00000406117.6	246.367	0.0428492	0.18104	0.236683	0.812903	0.898155
ENSG00000100345.24	ENST00000690244.1	780.648	-0.652242	0.165566	-3.93946	8.16663e-05	0.000571821
ENSG00000100346.18	ENST00000407673.5	444.603	1.64861	0.844584	1.95198	0.0509409	0.129432
ENSG00000100348.11	ENST00000930525.1	596.426	-0.448775	0.167585	-2.67789	0.00740872	0.0272701
ENSG00000100350.17	ENST00000423980.1	63.845	-0.668371	0.369362	-1.80953	0.0703687	0.165845
ENSG00000100351.18	ENST00000460449.1	2.45281	0.0696305	4.16297	0.0167262	0.986655
ENSG00000100353.19	ENST00000462794.1	144.341	-0.140674	0.190074	-0.7401	0.459239	0.633186
ENSG00000100360.16	ENST00000476548.1	57.2731	-0.154006	0.394828	-0.390059	0.696493	0.819579
ENSG00000100364.20	ENST00000483374.1	276.204	-0.801944	0.225409	-3.55773	0.000374075	0.00215268
ENSG00000100372.16	ENST00000434185.1	900.666	0.481853	0.127281	3.78575	0.000153243	0.000996803
ENSG00000100373.11	ENST00000396082.2	11.9831	0.0696875	2.19764	0.0317102	0.974703
ENSG00000100376.13	ENST00000476478.1	88.5711	0.193892	0.24815	0.781352	0.434596	0.611532
ENSG00000100379.19	ENST00000462640.1	57.9935	-0.395101	0.346155	-1.1414	0.253705	0.423115
ENSG00000100380.16	ENST00000495652.1	292.295	-0.618833	0.160999	-3.84371	0.000121189	0.000809313
ENSG00000100385.16	ENST00000698896.1	15.9796	-0.520083	0.953074	-0.54569	0.585279
ENSG00000100387.10	ENST00000476110.1	718.266	-0.0626151	0.174823	-0.358163	0.720221	0.835721
ENSG00000100393.17	ENST00000634422.1	285.247	-0.64212	0.234408	-2.73933	0.00615653	0.0233392
ENSG00000100395.16	ENST00000969170.1	647.529	-0.0155973	0.159178	-0.0979866	0.921943	0.966324
ENSG00000100399.17	ENST00000892871.1	147.19	0.716475	0.725643	0.987365	0.323464	0.501023
ENSG00000100401.22	ENST00000422838.1	331.73	0.646502	0.175126	3.69165	0.000222807	0.00137676
ENSG00000100403.13	ENST00000897618.1	1884.48	-0.243425	0.149859	-1.62436	0.1043	0.223552
ENSG00000100410.9	ENST00000899733.1	299.942	-0.313331	0.184609	-1.69727	0.0896465	0.19967
ENSG00000100412.18	ENST00000676883.1	360.047	-0.435877	0.178052	-2.44803	0.0143641	0.0468113
ENSG00000100413.18	ENST00000355209.9	1018.84	-0.0922594	0.188855	-0.488521	0.625181	0.766552
ENSG00000100417.13	ENST00000463617.5	65.9037	0.628391	0.398517	1.57683	0.114836	0.240444
ENSG00000100418.9	ENST00000463886.1	188.793	-0.19649	0.224775	-0.874163	0.38203	0.559496
ENSG00000100422.15	ENST00000471929.1	101.936	-0.499812	0.273567	-1.82702	0.0676972	0.16106
ENSG00000100425.21	ENST00000479985.1	35.2663	0.0387032	0.421125	0.0919043	0.926774	0.969352
ENSG00000100426.9	ENST00000921492.1	1002.1	-0.16657	0.122165	-1.36348	0.172732	0.322312
ENSG00000100427.17	ENST00000483836.1	5.68386	0.069685	2.43303	0.0286412	0.977151
ENSG00000100433.17	ENST00000312350.9	8.49466	-0.332494	1.14256	-0.291007	0.771046
ENSG00000100439.12	ENST00000489928.1	31.0807	-1.16034	0.457427	-2.53667	0.0111912	0.0382466
ENSG00000100441.11	ENST00000556255.1	109.783	-0.694478	0.21098	-3.29168	0.000995918	0.00501285
ENSG00000100442.12	ENST00000904115.1	685.264	-0.325742	0.148911	-2.1875	0.0287062	0.082132
ENSG00000100445.19	ENST00000555561.5	114.907	-0.353591	0.306671	-1.153	0.248911	0.41759
ENSG00000100461.19	ENST00000556838.5	328.323	-0.433574	0.172502	-2.51344	0.011956	0.0403091
ENSG00000100462.17	ENST00000557015.1	263.126	-0.589933	0.18737	-3.14849	0.00164117	0.00765829
ENSG00000100473.19	ENST00000553833.5	158.156	-0.194201	0.192308	-1.00984	0.312571	0.4893
ENSG00000100478.18	ENST00000216366.9	57.4819	0.436811	0.336285	1.29893	0.193967	0.350036
ENSG00000100479.15	ENST00000553850.1	27.1964	-0.279244	0.439939	-0.634733	0.525602	0.687478
[truncated: 16,169 more rows]

## Sheet: OSCHX_SERIPH2nd-vs-1st-Exon
Gene ID	Transcript ID	baseMean	log2FoldChange	lfcSE	stat	pvalue	padj
ENSG00000000003.17	ENST00000966005.1	391.94	-3.88124	0.310536	-12.4985	7.60593e-36	4.0349e-35
ENSG00000000419.15	ENST00000684628.1	257.397	1.6349	0.22334	7.32023	2.47543e-13	6.42311e-13
ENSG00000000457.15	ENST00000367771.11	264.22	0.383355	0.252415	1.51875	0.128826	0.15237
ENSG00000000460.18	ENST00000496973.5	211.954	0.0237351	0.231356	0.102591	0.918287	0.928197
ENSG00000000938.14	ENST00000475472.5	9.00656	6.56853	1.57938	4.15892	3.19753e-05	5.33661e-05
ENSG00000001036.15	ENST00000367585.1	154.059	-4.10279	0.510213	-8.04134	8.88644e-16	2.5535e-15
ENSG00000001167.16	ENST00000914467.1	576.691	-0.591895	0.151732	-3.90093	9.58255e-05	0.000154742
ENSG00000001460.19	ENST00000483261.1	12.4745	-3.23493	1.47513	-2.19299	0.0283083	0.0363551
ENSG00000001461.20	ENST00000488155.1	51.0319	-1.34279	0.483559	-2.77688	0.00548826	0.00759783
ENSG00000001497.19	ENST00000469091.1	116.157	-1.01131	0.456588	-2.21492	0.0267656	0.0344735
ENSG00000001561.8	ENST00000962954.1	161.718	-3.93945	0.599459	-6.57168	4.97507e-11	1.15756e-10
ENSG00000001617.13	ENST00000420831.1	157.142	3.52034	0.28759	12.2408	1.88136e-34	9.62423e-34
ENSG00000001626.19	ENST00000436097.2	14.164	2.73413	0.90317	3.02726	0.00246778	0.00353132
ENSG00000001629.11	ENST00000486698.1	8.72741	-0.988033	1.18831	-0.831459	0.405714	0.442655
ENSG00000001630.19	ENST00000482924.1	196.927	-1.57234	0.249763	-6.29535	3.06715e-10	6.87304e-10
ENSG00000001631.18	ENST00000466166.1	91.5347	0.17707	0.419734	0.421863	0.673125	0.702182
ENSG00000002016.19	ENST00000542297.1	15.8825	-4.14711	1.43364	-2.89272	0.00381923	0.00536962
ENSG00000002330.15	ENST00000493798.1	30.9324	-4.82383	1.38285	-3.48831	0.000486076	0.000740028
ENSG00000002549.14	ENST00000508014.5	82.8031	-3.98947	0.639616	-6.23729	4.45229e-10	9.90148e-10
ENSG00000002587.11	ENST00000952065.1	2.13172	1.82508	2.0211	0.903013	0.366519	0.403071
ENSG00000002745.13	ENST00000361301.6	149.946	3.9573	0.273121	14.4892	1.41824e-47	9.8159e-47
ENSG00000002746.16	ENST00000493057.1	10.906	-2.35168	1.70242	-1.38137	0.167165	0.194512
ENSG00000002834.20	ENST00000433206.6	915.403	-0.981531	0.152326	-6.44361	1.16662e-10	2.66904e-10
ENSG00000002919.16	ENST00000577310.1	13.4646	1.52111	0.681348	2.23251	0.0255815	0.0330322
ENSG00000003056.9	ENST00000544193.1	193.478	-2.85849	0.353671	-8.08234	6.35348e-16	1.83532e-15
ENSG00000003096.16	ENST00000881391.1	2361.57	3.79353	0.131865	28.7684	5.33892e-182	2.24925e-180
ENSG00000003137.9	ENST00000412253.1	51.5121	0.0339233	0.401269	0.08454	0.932627	0.941164
ENSG00000003147.20	ENST00000476942.1	0.585318	1.4028	3.87321	0.362181	0.717217	0.74374
ENSG00000003249.16	ENST00000623401.1	271.711	-3.90646	0.326975	-11.9473	6.70884e-33	3.30199e-32
ENSG00000003393.17	ENST00000679503.1	203.229	-0.505204	0.253758	-1.99089	0.0464927	0.0582007
ENSG00000003400.17	ENST00000484926.1	3.21583	-1.53009	1.75359	-0.872547	0.38291	0.419716
ENSG00000003402.22	ENST00000490965.1	3.4739	-0.605366	1.83045	-0.33072	0.740856	0.765923
ENSG00000003436.17	ENST00000971372.1	138.41	-2.75435	0.413714	-6.65762	2.78297e-11	6.5666e-11
ENSG00000003509.17	ENST00000474257.5	88.1955	-1.11955	0.484608	-2.31021	0.0208765	0.027233
ENSG00000003987.15	ENST00000518272.5	11.7178	2.51238	0.912267	2.75399	0.00588728	0.00812388
ENSG00000003989.19	ENST00000398090.3	1087.06	-2.95735	0.184423	-16.0357	7.19422e-58	6.14725e-57
ENSG00000004059.12	ENST00000864451.1	664.927	-4.86695	0.341229	-14.263	3.72145e-46	2.50158e-45
ENSG00000004142.13	ENST00000902298.1	1419.09	-3.00357	0.172489	-17.4131	6.56507e-68	6.71701e-67
ENSG00000004399.14	ENST00000511018.1	46.2314	-1.7414	0.465403	-3.74171	0.000182776	0.000288598
ENSG00000004455.19	ENST00000466029.1	870.22	-2.48931	0.198109	-12.5654	3.27388e-36	1.75561e-35
ENSG00000004468.14	ENST00000510674.1	39.3042	4.62014	0.543653	8.49832	1.92353e-17	5.90364e-17
ENSG00000004478.9	ENST00000539181.1	258.966	-4.0481	0.368698	-10.9794	4.79981e-28	2.07182e-27
ENSG00000004487.19	ENST00000602503.1	282.447	-4.98202	0.464588	-10.7235	7.89391e-27	3.28467e-26
ENSG00000004534.16	ENST00000478026.1	54.4679	1.73423	0.371508	4.66807	3.04037e-06	5.456e-06
ENSG00000004660.16	ENST00000158166.5	687.673	1.43881	0.191756	7.50336	6.22025e-14	1.65492e-13
ENSG00000004700.17	ENST00000965024.1	592.458	-3.93957	0.280741	-14.0328	9.82282e-45	6.42972e-44
ENSG00000004766.18	ENST00000476413.1	33.2381	-0.833182	0.668081	-1.24713	0.212351	0.243205
ENSG00000004776.14	ENST00000592984.6	4.24711	3.90273	1.59868	2.44123	0.0146374	0.0194236
ENSG00000004777.19	ENST00000586918.1	5.28611	3.15203	1.28694	2.44925	0.0143154	0.0190174
ENSG00000004779.11	ENST00000882848.1	408.363	-4.22129	0.414837	-10.1758	2.54364e-24	9.75118e-24
ENSG00000004799.9	ENST00000473301.1	2.29409	-3.50919	2.16777	-1.6188	0.105491	0.126324
ENSG00000004809.15	ENST00000460159.1	3.7472	4.79702	1.94527	2.46599	0.0136634	0.0181898
ENSG00000004838.15	ENST00000475688.1	21.7518	4.098	0.735666	5.57046	2.54066e-08	5.15701e-08
ENSG00000004846.17	ENST00000441315.1	1.79425	-3.1901	2.27467	-1.40245	0.160782	0.187573
ENSG00000004864.15	ENST00000494085.1	133.387	-4.99602	0.67836	-7.36486	1.77339e-13	4.63298e-13
ENSG00000004866.23	ENST00000464020.1	62.2519	-0.105998	0.452477	-0.234261	0.814782	0.834294
ENSG00000004897.13	ENST00000576484.1	592.676	-1.85939	0.303731	-6.12182	9.25118e-10	2.02394e-09
ENSG00000004939.16	ENST00000498270.1	90.837	4.66296	0.351182	13.2779	3.10942e-40	1.83699e-39
ENSG00000004948.17	ENST00000887175.1	18.6652	4.42585	0.826221	5.35674	8.47379e-08	1.67155e-07
ENSG00000004961.16	ENST00000911475.1	248.366	-3.24817	0.363766	-8.92927	4.28822e-19	1.39271e-18
ENSG00000005001.11	ENST00000574768.5	3.96716	4.88452	2.23917	2.1814	0.0291538	0.037381
ENSG00000005007.15	ENST00000594243.1	83.0734	-0.866249	0.351407	-2.46509	0.0136979	0.0182338
ENSG00000005020.14	ENST00000490456.6	832.939	3.52696	0.184439	19.1227	1.63446e-81	2.06256e-80
ENSG00000005022.7	ENST00000463551.1	743.731	-5.69388	0.36984	-15.3955	1.7541e-53	1.37881e-52
ENSG00000005059.17	ENST00000494604.1	65.065	-3.14421	0.593943	-5.29379	1.19807e-07	2.34227e-07
ENSG00000005073.6	ENST00000517402.1	187.056	-4.74451	0.619322	-7.66082	1.84754e-14	5.02967e-14
ENSG00000005100.13	ENST00000225296.8	1712	-1.16609	0.0912253	-12.7825	2.05397e-37	1.13686e-36
ENSG00000005102.15	ENST00000318579.9	29.3891	3.10558	0.551144	5.63479	1.75276e-08	3.58816e-08
ENSG00000005108.17	ENST00000408005.2	5.49118	1.00402	1.24028	0.809507	0.418224	0.455239
ENSG00000005156.13	ENST00000585370.1	65.9823	-2.86279	0.590822	-4.84544	1.26328e-06	2.32412e-06
ENSG00000005175.11	ENST00000548296.1	88.7347	-2.0489	0.510881	-4.01052	6.05847e-05	9.92291e-05
ENSG00000005187.13	ENST00000563914.1	6.41602	-1.99626	1.61904	-1.23299	0.217581	0.248808
ENSG00000005189.21	ENST00000563045.1	10.0229	-4.18319	1.611	-2.59664	0.00941412	0.0127356
ENSG00000005194.16	ENST00000564885.1	33.6209	-3.05745	0.952455	-3.21008	0.00132699	0.00194725
ENSG00000005206.18	ENST00000587851.1	311.734	4.73032	0.217871	21.7116	1.59462e-104	2.85169e-103
ENSG00000005238.21	ENST00000903802.1	17.1621	-0.925415	0.64941	-1.42501	0.154155	0.180343
ENSG00000005243.11	ENST00000580409.5	5.60816	3.74968	1.23827	3.02815	0.00246053	0.00352123
ENSG00000005249.15	ENST00000706593.1	111.421	-4.42815	0.778394	-5.68882	1.27918e-08	2.6369e-08
ENSG00000005302.19	ENST00000494268.1	73.4546	-3.78448	0.891472	-4.2452	2.184e-05	3.68985e-05
ENSG00000005339.15	ENST00000575237.2	209.146	-1.40478	0.238341	-5.89398	3.77005e-09	7.99484e-09
ENSG00000005436.15	ENST00000470503.1	215.886	-1.93727	0.327245	-5.91993	3.22073e-09	6.8509e-09
ENSG00000005448.18	ENST00000482605.1	52.2532	-4.21925	0.796959	-5.29419	1.19545e-07	2.33733e-07
ENSG00000005469.13	ENST00000469785.1	3.18278	-1.201	1.86697	-0.643287	0.520038	0.555778
ENSG00000005471.20	ENST00000467983.1	2.07568	-0.338036	1.98434	-0.170352	0.864733	0.879359
ENSG00000005483.23	ENST00000496191.1	69.3107	-0.300122	0.362953	-0.826889	0.4083	0.445209
ENSG00000005486.18	ENST00000428119.1	230.786	-2.4922	0.29969	-8.31592	9.10403e-17	2.72053e-16
ENSG00000005513.11	ENST00000711628.1	104.598	-0.328028	0.319166	-1.02777	0.304059	0.339098
ENSG00000005700.16	ENST00000508381.1	112.391	-3.05932	0.507998	-6.0223	1.71957e-09	3.71056e-09
ENSG00000005801.19	ENST00000529789.5	272.717	0.829434	0.239356	3.46528	0.000529685	0.000803806
ENSG00000005810.21	ENST00000485061.2	328.319	-1.63211	0.226744	-7.19803	6.10874e-13	1.55541e-12
ENSG00000005812.12	ENST00000885164.1	1462.09	-0.530478	0.161621	-3.28223	0.00102988	0.00152562
ENSG00000005844.20	ENST00000564632.1	29.3633	4.88786	0.654369	7.46958	8.04505e-14	2.13033e-13
ENSG00000005882.13	ENST00000506242.5	87.7021	-2.87927	0.470922	-6.11411	9.70948e-10	2.12206e-09
ENSG00000005884.19	ENST00000514834.1	20.1164	-0.287845	0.616147	-0.46717	0.640378	0.671105
ENSG00000005889.17	ENST00000480195.1	713.533	3.53879	0.15384	23.0031	4.34123e-117	9.15802e-116
ENSG00000005893.18	ENST00000486593.5	637.979	-1.08394	0.184312	-5.88099	4.07812e-09	8.63355e-09
ENSG00000005961.20	ENST00000592944.1	38.8067	5.49064	0.630899	8.70288	3.23565e-18	1.02137e-17
ENSG00000006007.13	ENST00000563645.1	235.51	-2.15497	0.256347	-8.40646	4.22563e-17	1.27997e-16
ENSG00000006015.19	ENST00000595490.1	84.157	-0.877904	0.386733	-2.27006	0.0232042	0.0301056
ENSG00000006016.13	ENST00000596360.1	4.13631	-2.4797	1.66796	-1.48667	0.137103	0.161594
ENSG00000006025.14	ENST00000578461.1	7.09192	0.210103	1.11223	0.188903	0.850169	0.866262
ENSG00000006042.13	ENST00000583437.2	91.3414	-4.16463	0.640295	-6.50424	7.80875e-11	1.80059e-10
ENSG00000006062.19	ENST00000586644.2	82.5665	-1.02211	0.373313	-2.73793	0.0061827	0.00851359
ENSG00000006071.16	ENST00000526037.6	2.64046	-2.79425	1.92576	-1.45099	0.146784	0.172331
ENSG00000006116.5	ENST00000876789.1	24.2477	4.06881	0.669955	6.07326	1.2534e-09	2.72518e-09
ENSG00000006125.19	ENST00000938755.1	4149.74	-2.8901	0.107919	-26.7804	5.47216e-158	1.8443e-156
ENSG00000006128.13	ENST00000495916.1	1.69903	-3.90094	2.61129	-1.49388	0.135208	0.159475
ENSG00000006194.12	ENST00000219069.6	301.574	-0.854774	0.201625	-4.23942	2.24101e-05	3.78294e-05
ENSG00000006210.7	ENST00000565912.1	7.38304	4.05116	1.18359	3.42278	0.000619832	0.000935441
ENSG00000006283.18	ENST00000506520.1	27.3701	2.62657	0.578379	4.54126	5.59196e-06	9.85373e-06
ENSG00000006327.15	ENST00000574699.1	10.407	0.0407608	0.876804	0.0464879	0.962921	0.968249
ENSG00000006377.11	ENST00000518156.3	48.5521	-2.70584	0.682962	-3.96192	7.43493e-05	0.000120967
ENSG00000006432.17	ENST00000933971.1	404.299	1.22969	0.15445	7.96173	1.69646e-15	4.81771e-15
ENSG00000006451.9	ENST00000436179.1	594.913	1.69854	0.158197	10.7369	6.83105e-27	2.8486e-26
ENSG00000006453.15	ENST00000480580.1	94.9356	-0.839695	0.480914	-1.74604	0.0808043	0.0982248
ENSG00000006459.12	ENST00000478996.1	62.9035	-2.25103	0.477707	-4.71216	2.45105e-06	4.42705e-06
ENSG00000006468.16	ENST00000433547.1	1.38369	-1.19072	2.36161	-0.504198	0.614123	0.646194
ENSG00000006530.19	ENST00000494053.1	152.159	-1.83243	0.311441	-5.88371	4.01168e-09	8.4957e-09
ENSG00000006534.18	ENST00000616697.1	8.31638	2.17305	1.11386	1.95091	0.0510681	0.0636258
ENSG00000006576.18	ENST00000470215.1	247.512	2.50577	0.294671	8.50359	1.83812e-17	5.64405e-17
ENSG00000006606.9	ENST00000394905.2	3.98033	6.40282	1.91074	3.35097	0.000805296	0.0012037
ENSG00000006607.15	ENST00000413432.2	858.963	0.82805	0.110509	7.49304	6.72976e-14	1.78782e-13
ENSG00000006611.18	ENST00000624811.1	5.93067	-4.27828	1.64384	-2.60261	0.00925164	0.0125251
ENSG00000006625.19	ENST00000426081.5	156.595	-2.99488	0.494992	-6.05036	1.44522e-09	3.1316e-09
ENSG00000006634.9	ENST00000495067.1	104.737	-2.77085	0.468084	-5.91956	3.22796e-09	6.86571e-09
ENSG00000006638.14	ENST00000589966.1	36.8442	0.657942	0.473447	1.38969	0.164624	0.191752
ENSG00000006652.15	ENST00000417662.1	59.2699	0.322324	0.429115	0.751136	0.452571	0.489365
ENSG00000006695.13	ENST00000429152.6	97.5515	-1.9995	0.399858	-5.00053	5.71725e-07	1.07453e-06
ENSG00000006704.12	ENST00000486086.1	49.9862	0.077922	0.435646	0.178866	0.858043	0.873279
ENSG00000006712.16	ENST00000598127.1	392.315	-0.226795	0.231141	-0.981198	0.326495	0.362313
ENSG00000006715.17	ENST00000490924.1	31.69	-5.18918	1.38383	-3.74986	0.00017693	0.000279738
ENSG00000006740.19	ENST00000581437.1	67.9905	-2.59062	0.526635	-4.9192	8.68994e-07	1.61417e-06
ENSG00000006744.20	ENST00000476042.1	362.863	-0.994828	0.183503	-5.42131	5.91623e-08	1.176e-07
ENSG00000006747.16	ENST00000476649.1	1.77735	-1.15701	2.53412	-0.456574	0.647977	0.678341
ENSG00000006757.13	ENST00000889418.1	96.298	-2.82954	0.540833	-5.23181	1.67854e-07	3.25428e-07
ENSG00000006831.11	ENST00000537190.1	61.8223	-2.9609	0.555528	-5.32987	9.82807e-08	1.93168e-07
ENSG00000006837.12	ENST00000522501.1	254.027	3.55195	0.256425	13.8518	1.24038e-43	7.91596e-43
ENSG00000007001.15	ENST00000715224.1	5.91404	4.47505	1.4291	3.13138	0.00173987	0.00252672
ENSG00000007038.12	ENST00000577043.1	36.7043	6.48305	0.80297	8.07384	6.81212e-16	1.9661e-15
ENSG00000007062.13	ENST00000511270.1	0.832199	2.72418	3.41765	0.797092	0.425398	0.462362
ENSG00000007080.12	ENST00000597436.5	373.681	0.0060157	0.253877	0.0236954	0.981096	0.983457
ENSG00000007129.19	ENST00000967641.1	2.80475	4.81861	2.11491	2.2784	0.0227029	0.0294927
ENSG00000007168.16	ENST00000610190.2	1166.44	0.233892	0.106857	2.18882	0.0286097	0.036719
ENSG00000007171.20	ENST00000697340.1	23.7114	-0.806394	0.657469	-1.22651	0.220006	0.251376
ENSG00000007202.17	ENST00000577261.1	751.136	-3.06192	0.183255	-16.7085	1.13671e-62	1.05711e-61
ENSG00000007216.17	ENST00000541739.6	10.0823	5.70664	1.31681	4.33368	1.46639e-05	2.50758e-05
ENSG00000007237.20	ENST00000580865.5	44.6774	-0.517455	0.50176	-1.03128	0.302409	0.337386
ENSG00000007255.11	ENST00000587818.1	44.4767	0.384997	0.533356	0.72184	0.470393	0.507031
ENSG00000007264.16	ENST00000588983.5	226.199	4.28842	0.262911	16.3113	8.20061e-60	7.26559e-59
ENSG00000007306.16	ENST00000599715.1	145.139	5.86766	0.396899	14.7838	1.86443e-49	1.34503e-48
ENSG00000007312.15	ENST00000559358.1	8.62844	3.28316	1.16158	2.82647	0.00470641	0.00656111
ENSG00000007314.12	ENST00000584310.1	6.26163	3.78957	1.53309	2.47185	0.0134415	0.0179056
ENSG00000007341.20	ENST00000498383.5	203.595	1.11012	0.209925	5.28817	1.23544e-07	2.41358e-07
ENSG00000007372.25	ENST00000532916.5	75.2204	-0.588976	0.442481	-1.33108	0.183164	0.211919
ENSG00000007376.9	ENST00000561734.5	184.809	-4.6182	0.567952	-8.13131	4.24678e-16	1.23472e-15
ENSG00000007384.16	ENST00000493647.1	69.5871	3.36338	0.537123	6.26183	3.80476e-10	8.48882e-10
ENSG00000007392.18	ENST00000467552.1	131.939	3.6813	0.461952	7.96902	1.59938e-15	4.54651e-15
ENSG00000007402.13	ENST00000483620.1	55.493	0.245902	0.368737	0.666875	0.504852	0.540955
ENSG00000007516.16	ENST00000561602.1	4.92762	2.35815	1.35125	1.74516	0.0809571	0.0983993
ENSG00000007520.5	ENST00000566296.1	100.983	-2.50806	0.419937	-5.97246	2.33696e-09	5.00338e-09
ENSG00000007541.18	ENST00000537901.1	34.1193	-1.76661	0.551541	-3.20304	0.00135983	0.0019938
ENSG00000007545.17	ENST00000467286.1	48.4541	-0.936419	0.430558	-2.17489	0.0296381	0.0379596
ENSG00000007908.16	ENST00000609271.1	35.6592	4.22755	0.546862	7.73057	1.07068e-14	2.94805e-14
ENSG00000007923.18	ENST00000689169.1	426.856	-1.74107	0.215655	-8.07342	6.83573e-16	1.97271e-15
ENSG00000007933.14	ENST00000534514.1	4.106	3.36975	1.84193	1.82947	0.0673294	0.0826957
ENSG00000007944.16	ENST00000356840.8	742.592	0.343651	0.148592	2.31272	0.0207382	0.0270606
ENSG00000007968.8	ENST00000487237.1	88.0005	1.61792	0.278318	5.81322	6.12826e-09	1.28551e-08
ENSG00000008018.10	ENST00000920418.1	1508.73	-0.477559	0.12805	-3.72946	0.000191887	0.000302467
ENSG00000008056.15	ENST00000640721.1	24.2171	3.60038	0.701519	5.13227	2.86275e-07	5.47839e-07
ENSG00000008083.15	ENST00000930276.1	2625.16	2.08061	0.0831944	25.009	4.87381e-138	1.32712e-136
ENSG00000008086.13	ENST00000624953.1	198.171	4.96179	0.354039	14.0148	1.26509e-44	8.26263e-44
ENSG00000008128.24	ENST00000495016.5	28.0157	1.09594	0.504703	2.17144	0.0298976	0.0382725
ENSG00000008130.16	ENST00000497747.5	60.8565	-3.94285	0.679471	-5.80283	6.52048e-09	1.36595e-08
ENSG00000008226.21	ENST00000478428.1	6.90715	4.01336	1.27856	3.13897	0.00169544	0.00246475
ENSG00000008256.18	ENST00000466543.1	28.3084	-2.7526	0.824888	-3.33694	0.000847057	0.00126374
ENSG00000008277.16	ENST00000476330.1	32.0209	2.66022	0.772093	3.44547	0.000570069	0.000862934
ENSG00000008282.11	ENST00000460770.1	159.046	-3.276	0.405503	-8.07887	6.53709e-16	1.88772e-15
ENSG00000008283.17	ENST00000585153.1	10.3468	-5.66419	1.632	-3.47071	0.000519076	0.000788243
ENSG00000008294.23	ENST00000509724.1	228.473	-0.140681	0.238158	-0.590702	0.55472	0.589412
ENSG00000008300.17	ENST00000164024.5	1239.1	3.27281	0.133813	24.458	4.13342e-132	1.04012e-130
ENSG00000008311.17	ENST00000679659.1	500.68	-0.16844	0.226316	-0.744269	0.456714	0.493426
ENSG00000008323.17	ENST00000536531.5	2.8266	6.43788	2.63106	2.44688	0.01441	0.0191361
ENSG00000008324.13	ENST00000897957.1	68.5821	-1.38417	0.448881	-3.0836	0.00204512	0.00295071
ENSG00000008382.17	ENST00000601877.1	24.3993	-2.32862	0.786611	-2.96031	0.00307325	0.00436126
ENSG00000008394.14	ENST00000624056.1	13.5965	2.52124	0.756816	3.33138	0.000864165	0.00128823
ENSG00000008405.13	ENST00000546722.1	37.5882	-0.117998	0.494398	-0.23867	0.811362	0.831192
ENSG00000008441.19	ENST00000591028.1	82.7231	1.88458	0.31623	5.95952	2.52973e-09	5.4071e-09
ENSG00000008513.18	ENST00000522285.1	4.7732	1.47475	1.76194	0.837006	0.402589	0.439485
ENSG00000008516.20	ENST00000612971.2	87.2015	3.61098	0.33528	10.77	4.76743e-27	1.99784e-26
ENSG00000008517.20	ENST00000525003.1	22.4304	1.27789	0.527747	2.42141	0.0154606	0.0204615
ENSG00000008710.20	ENST00000568796.1	67.0884	0.616737	0.381637	1.61603	0.106088	0.126995
ENSG00000008735.15	ENST00000952232.1	233.962	-1.24289	0.293807	-4.23029	2.33395e-05	3.93508e-05
ENSG00000008838.22	ENST00000492176.2	269.76	-2.59033	0.26641	-9.72312	2.40307e-22	8.65923e-22
ENSG00000008853.19	ENST00000523918.1	21.0573	-4.75994	1.42482	-3.34072	0.00083562	0.00124723
ENSG00000008869.13	ENST00000471051.1	113.497	-0.709252	0.307269	-2.30825	0.0209855	0.0273686
ENSG00000008952.18	ENST00000469890.1	39.2122	-0.626411	0.602721	-1.0393	0.298663	0.333496
ENSG00000008988.12	ENST00000519369.1	1866.61	-3.95875	0.213259	-18.5631	6.39028e-77	7.59371e-76
ENSG00000009307.18	ENST00000483407.1	1245.08	-3.44916	0.191311	-18.0291	1.15251e-72	1.2793e-71
ENSG00000009335.20	ENST00000469336.1	409.678	2.25566	0.217382	10.3765	3.17297e-25	1.25288e-24
ENSG00000009413.17	ENST00000470871.1	115.7	-0.269841	0.326145	-0.827366	0.408029	0.444926
ENSG00000009694.14	ENST00000422452.4	1858.22	3.67265	0.13987	26.2575	5.86862e-152	1.84294e-150
ENSG00000009709.14	ENST00000713642.1	4.2792	-2.85273	1.80155	-1.58348	0.113311	0.135073
ENSG00000009724.19	ENST00000480221.1	36.5291	7.5693	1.16004	6.52502	6.79929e-11	1.57239e-10
ENSG00000009765.16	ENST00000229447.9	20.7298	4.00282	0.740815	5.40326	6.54396e-08	1.29791e-07
ENSG00000009780.17	ENST00000446647.1	61.9905	-2.1226	0.693263	-3.06175	0.00220049	0.00316391
ENSG00000009830.14	ENST00000683721.1	38.3855	-2.87513	0.63979	-4.49386	6.99444e-06	1.22448e-05
ENSG00000009844.17	ENST00000890564.1	1098.1	-3.68103	0.228792	-16.089	3.04759e-58	2.62111e-57
ENSG00000009950.17	ENST00000467221.1	18.0896	0.54624	0.7008	0.779452	0.435714	0.472683
ENSG00000009954.11	ENST00000466844.1	230.958	0.45959	0.285517	1.60967	0.107469	0.12855
ENSG00000010017.14	ENST00000469916.1	133.791	-1.40851	0.310622	-4.53448	5.77451e-06	1.01662e-05
ENSG00000010030.14	ENST00000339796.9	161.559	1.02977	0.210832	4.88435	1.03771e-06	1.9191e-06
ENSG00000010072.17	ENST00000492437.1	120.171	-0.940402	0.306688	-3.06631	0.00216716	0.00311795
ENSG00000010165.21	ENST00000485629.1	143.675	-0.935064	0.289663	-3.22811	0.0012461	0.00183333
ENSG00000010219.14	ENST00000544050.1	49.1378	-0.930623	0.451496	-2.0612	0.039284	0.049601
ENSG00000010244.20	ENST00000582705.1	1239.75	0.209563	0.161919	1.29424	0.195581	0.225279
ENSG00000010256.13	ENST00000480561.5	268.696	-2.33469	0.253738	-9.20118	3.54024e-20	1.19048e-19
ENSG00000010270.15	ENST00000972201.1	368.233	-2.59368	0.296113	-8.7591	1.96818e-18	6.25543e-18
ENSG00000010278.16	ENST00000676638.1	79.5481	-2.30255	0.478431	-4.81272	1.48891e-06	2.72628e-06
ENSG00000010282.16	ENST00000480939.1	1.05314	4.35852	3.8274	1.13877	0.254799	0.287784
ENSG00000010292.14	ENST00000536090.1	294.961	-2.32656	0.236649	-9.83125	8.25853e-23	3.01683e-22
ENSG00000010310.10	ENST00000591322.1	5.39742	5.73635	1.6432	3.49096	0.000481297	0.000732954
ENSG00000010318.23	ENST00000473145.5	51.8013	1.18022	0.425709	2.77236	0.00556521	0.00769689
ENSG00000010319.8	ENST00000475739.1	12.5063	2.12413	0.711297	2.98628	0.00282393	0.00401934
ENSG00000010322.17	ENST00000467594.1	96.1664	-2.02985	0.384288	-5.28209	1.27716e-07	2.49292e-07
ENSG00000010327.11	ENST00000469989.1	4.64455	1.53152	1.51078	1.01372	0.310714	0.346067
ENSG00000010361.15	ENST00000534138.1	42.663	-0.858959	0.452412	-1.89862	0.0576144	0.0713361
ENSG00000010379.17	ENST00000534887.1	13.5046	6.45621	1.36661	4.72426	2.30959e-06	4.17786e-06
ENSG00000010404.19	ENST00000428056.6	103.085	-0.87152	0.316734	-2.75158	0.00593086	0.0081818
ENSG00000010539.13	ENST00000575630.1	55.2303	1.08761	0.434882	2.50093	0.0123867	0.016561
ENSG00000010610.11	ENST00000539492.1	48.5132	7.07937	0.824654	8.58466	9.11068e-18	2.83004e-17
ENSG00000010626.16	ENST00000486401.1	141.56	4.19397	0.271131	15.4684	5.66649e-54	4.49778e-53
ENSG00000010671.19	ENST00000695632.1	119.526	4.16319	0.301124	13.8255	1.789e-43	1.13798e-42
ENSG00000010803.19	ENST00000488592.1	664.763	1.28319	0.225338	5.69452	1.2372e-08	2.55231e-08
ENSG00000010810.19	ENST00000495935.1	232.198	0.279468	0.182371	1.53242	0.12542	0.148567
ENSG00000010818.12	ENST00000703920.1	1674.41	1.92844	0.149353	12.912	3.85349e-38	2.17055e-37
ENSG00000011007.14	ENST00000609199.2	1961.46	1.09945	0.0777906	14.1334	2.3643e-45	1.5672e-44
ENSG00000011009.13	ENST00000472213.1	181.065	0.477594	0.26754	1.78513	0.0742403	0.0906646
ENSG00000011021.24	ENST00000494028.1	57.9606	2.04091	0.414165	4.92778	8.31709e-07	1.54693e-06
ENSG00000011028.14	ENST00000580916.1	42.0774	1.07679	0.449371	2.39622	0.0165652	0.0218571
ENSG00000011083.9	ENST00000524041.1	3.82303	6.5159	2.38369	2.73354	0.00626583	0.0086224
ENSG00000011105.15	ENST00000539631.1	46.7878	4.96356	0.588312	8.43695	3.25728e-17	9.91082e-17
ENSG00000011114.16	ENST00000555525.1	226.676	-0.116368	0.248185	-0.468876	0.639158	0.669928
ENSG00000011132.13	ENST00000586991.1	47.1279	3.28837	0.466057	7.05573	1.71703e-12	4.27993e-12
ENSG00000011143.20	ENST00000583577.1	23.5177	-4.80826	1.38606	-3.469	0.000522396	0.000793112
ENSG00000011198.11	ENST00000463153.2	619.374	2.52676	0.143984	17.5489	6.06214e-69	6.31954e-68
ENSG00000011201.13	ENST00000481896.1	25.21	-2.91509	0.856554	-3.40327	0.000665833	0.0010025
ENSG00000011258.17	ENST00000586898.1	100.847	-0.741967	0.393459	-1.88576	0.0593278	0.0733437
ENSG00000011260.15	ENST00000582150.1	60.5729	0.250746	0.421122	0.595425	0.55156	0.586302
ENSG00000011275.19	ENST00000479541.1	128.631	-0.0857045	0.39572	-0.216579	0.828536	0.846579
ENSG00000011295.17	ENST00000583704.1	120.805	-2.57768	0.362004	-7.12057	1.07478e-12	2.70575e-12
ENSG00000011304.23	ENST00000592113.5	2148.18	-1.94786	0.128352	-15.176	5.10226e-52	3.89628e-51
ENSG00000011332.23	ENST00000488378.1	20.904	-2.07861	0.793966	-2.61801	0.00884443	0.011995
ENSG00000011347.11	ENST00000540831.1	14.291	-1.81703	0.919796	-1.97547	0.0482151	0.0602419
ENSG00000011376.13	ENST00000474585.1	82.0076	-0.625796	0.383187	-1.63314	0.102441	0.122861
ENSG00000011405.15	ENST00000265970.11	1685.41	-1.35345	0.205069	-6.59995	4.11288e-11	9.60907e-11
ENSG00000011422.13	ENST00000593447.5	35.4366	0.0379409	0.472746	0.0802564	0.936033	0.944236
ENSG00000011426.12	ENST00000429082.1	531.521	-0.764129	0.24412	-3.13014	0.00174721	0.0025369
ENSG00000011451.22	ENST00000600632.1	173.438	-2.85366	0.345925	-8.24937	1.59226e-16	4.71086e-16
ENSG00000011454.19	ENST00000474707.1	77.2286	0.019276	0.355979	0.0541493	0.956816	0.962665
ENSG00000011465.19	ENST00000548218.1	2.14987	3.6166	4.66963	0.774495	0.438638	0.475562
ENSG00000011478.13	ENST00000591606.1	108.995	0.635176	0.318279	1.99566	0.0459712	0.057577
ENSG00000011485.16	ENST00000467902.2	208.663	-2.78591	0.304121	-9.16056	5.16302e-20	1.72702e-19
ENSG00000011523.16	ENST00000497039.1	107.285	-2.83393	0.432745	-6.54873	5.8027e-11	1.3462e-10
ENSG00000011566.16	ENST00000475457.1	65.3018	1.33899	0.434294	3.08314	0.00204831	0.00295521
ENSG00000011590.15	ENST00000890381.1	5.49628	6.01831	1.89186	3.18117	0.00146682	0.00214465
ENSG00000011638.12	ENST00000573688.1	37.3241	0.456267	0.477365	0.955803	0.339172	0.375209
ENSG00000012048.27	ENST00000700082.1	178.474	-3.50911	0.377812	-9.28796	1.5727e-20	5.35594e-20
ENSG00000012061.18	ENST00000592410.5	43.4144	-2.78649	0.715169	-3.89627	9.76859e-05	0.000157655
ENSG00000012171.21	ENST00000439487.5	45.406	4.61246	0.551753	8.35964	6.29106e-17	1.89471e-16
ENSG00000012174.13	ENST00000860793.1	816.451	-3.43901	0.21315	-16.1342	1.46762e-58	1.26969e-57
ENSG00000012223.14	ENST00000462667.1	13.242	6.15172	4.36676	1.40876	0.158905	0.185536
ENSG00000012232.11	ENST00000523271.1	275.795	-2.61919	0.314588	-8.32576	8.37871e-17	2.508e-16
ENSG00000012504.16	ENST00000188403.7	209.926	2.23488	0.198458	11.2613	2.03834e-29	9.15699e-29
ENSG00000012660.15	ENST00000893722.1	1028.68	-0.469181	0.134283	-3.49399	0.000475866	0.000724914
ENSG00000012779.13	ENST00000475300.1	0.883737	-2.14989	2.73046	-0.787373	0.431063	0.468069
ENSG00000012822.17	ENST00000546443.5	201.264	-0.962308	0.23328	-4.12512	3.70541e-05	6.15504e-05
ENSG00000012963.16	ENST00000940499.1	723.973	-3.77056	0.229095	-16.4585	7.2924e-61	6.58186e-60
ENSG00000012983.13	ENST00000557124.1	79.1319	0.380762	0.412767	0.922461	0.356288	0.392605
ENSG00000013016.17	ENST00000322054.10	132.097	-2.65589	0.411704	-6.45096	1.11143e-10	2.5449e-10
ENSG00000013275.9	ENST00000601194.1	149.983	-4.25146	0.506344	-8.39639	4.60395e-17	1.3932e-16
ENSG00000013288.10	ENST00000510427.1	11.8443	-2.01656	1.0225	-1.97219	0.0485882	0.0606842
ENSG00000013297.13	ENST00000477531.3	287.96	4.79017	0.259573	18.454	4.83946e-76	5.68195e-75
ENSG00000013306.17	ENST00000592372.5	459.032	-3.19587	0.301965	-10.5836	3.55055e-26	1.4465e-25
ENSG00000013374.18	ENST00000497987.1	198.781	-1.4175	0.254673	-5.56596	2.60717e-08	5.28704e-08
ENSG00000013375.18	ENST00000605602.1	7.12777	-4.61316	1.61654	-2.85372	0.00432102	0.00604661
ENSG00000013392.9	ENST00000925505.1	37.9938	0.58839	0.554608	1.06091	0.28873	0.323187
ENSG00000013441.18	ENST00000461326.1	40.0219	0.23544	0.509618	0.461993	0.644087	0.674646
ENSG00000013503.11	ENST00000970164.1	898.645	-1.14202	0.173244	-6.59199	4.33963e-11	1.0128e-10
ENSG00000013523.13	ENST00000251089.8	548.228	-2.91989	0.225891	-12.9261	3.20709e-38	1.81142e-37
ENSG00000013561.19	ENST00000963023.1	318.956	-2.41414	0.267936	-9.01014	2.0579e-19	6.75982e-19
ENSG00000013563.15	ENST00000497242.1	25.8327	-4.40103	1.13846	-3.86579	0.000110729	0.000177891
ENSG00000013573.18	ENST00000539702.1	266.944	-0.898012	0.215989	-4.15767	3.21514e-05	5.36527e-05
ENSG00000013583.11	ENST00000905178.1	147.38	-6.16505	1.0422	-5.91542	3.31021e-09	7.03651e-09
ENSG00000013588.11	ENST00000648791.1	118.205	-0.560058	0.267995	-2.08981	0.0366352	0.0464136
ENSG00000013619.16	ENST00000464149.1	22.8195	-0.397687	0.715236	-0.556022	0.578196	0.611911
ENSG00000013725.15	ENST00000538288.1	4.74976	7.18405	5.95754	1.20587	0.227866	0.259483
ENSG00000013810.22	ENST00000484264.1	51.112	-3.01954	0.663924	-4.54803	5.41503e-06	9.55146e-06
ENSG00000014123.11	ENST00000461673.1	24.8636	-3.44338	1.14076	-3.01849	0.0025404	0.0036312
ENSG00000014138.11	ENST00000706542.1	140.549	-0.798306	0.258886	-3.08362	0.00204499	0.00295055
ENSG00000014164.8	ENST00000528401.1	163	5.33477	0.412161	12.9434	2.56024e-38	1.4498e-37
ENSG00000014216.17	ENST00000527887.1	34.4599	-3.209	0.729539	-4.39866	1.0892e-05	1.88056e-05
ENSG00000014257.17	ENST00000507647.1	1.78375	-3.15411	2.23695	-1.41	0.158539	0.185135
ENSG00000014641.22	ENST00000495083.1	144.35	-4.06719	0.51728	-7.86265	3.76091e-15	1.05484e-14
ENSG00000014824.15	ENST00000505523.1	388.628	-1.2479	0.223636	-5.58007	2.40426e-08	4.8864e-08
ENSG00000014919.14	ENST00000016171.6	712.474	-3.84972	0.222422	-17.3082	4.07699e-67	4.11768e-66
ENSG00000015133.20	ENST00000555995.1	29.8778	0.0459032	0.5431	0.0845207	0.932642	0.941176
ENSG00000015153.16	ENST00000550315.1	46.4429	-1.87348	0.55084	-3.40113	0.000671085	0.00101003
ENSG00000015285.13	ENST00000483750.6	253.169	6.04957	0.316374	19.1216	1.67023e-81	2.10745e-80
ENSG00000015413.11	ENST00000261615.5	366.379	7.49057	0.372127	20.1291	4.10708e-90	5.82314e-89
ENSG00000015475.20	ENST00000494097.5	64.9052	-0.543635	0.360186	-1.50932	0.131218	0.15502
ENSG00000015479.21	ENST00000511333.5	737.132	-1.83788	0.211124	-8.70524	3.16914e-18	1.00069e-17
ENSG00000015520.16	ENST00000423141.1	255.313	2.92942	0.197722	14.8159	1.15669e-49	8.37541e-49
ENSG00000015532.11	ENST00000571021.1	59.3369	-2.69582	0.623465	-4.32393	1.53277e-05	2.61681e-05
ENSG00000015592.18	ENST00000519614.5	23.0464	2.85178	0.564767	5.04947	4.43032e-07	8.38082e-07
ENSG00000015676.19	ENST00000480209.1	34.1257	-0.585204	0.554045	-1.05624	0.290859	0.325407
ENSG00000016082.16	ENST00000967706.1	66.7882	-2.88087	0.62443	-4.61359	3.95766e-06	7.04459e-06
ENSG00000016391.12	ENST00000959593.1	133.353	0.995457	0.266303	3.73807	0.000185441	0.000292644
ENSG00000016402.15	ENST00000460306.1	0.802319	-1.75865	3.21495	-0.547021	0.584364	0.617854
ENSG00000016864.20	ENST00000463762.1	43.1186	-2.90982	0.690658	-4.21311	2.51876e-05	4.23654e-05
ENSG00000017260.21	ENST00000507194.1	163.905	-2.52593	0.33783	-7.47694	7.60759e-14	2.01655e-13
ENSG00000017483.17	ENST00000429543.2	9.50786	4.76223	1.18907	4.005	6.20178e-05	0.000101506
ENSG00000017797.14	ENST00000943836.1	729.597	-0.416541	0.13898	-2.99713	0.00272533	0.00388495
ENSG00000018189.14	ENST00000504805.6	595.501	1.42354	0.230549	6.17459	6.63345e-10	1.46249e-09
ENSG00000018236.16	ENST00000551424.5	182.718	1.58518	0.329633	4.80891	1.51755e-06	2.77717e-06
ENSG00000018510.19	ENST00000681565.1	2341.26	1.69934	0.136238	12.4733	1.04397e-35	5.51662e-35
ENSG00000018610.16	ENST00000644802.2	481.6	1.513	0.158879	9.52297	1.68302e-21	5.91453e-21
ENSG00000018699.14	ENST00000448773.5	149.188	-0.277861	0.245837	-1.13026	0.258365	0.291542
ENSG00000018869.19	ENST00000301310.8	59.8761	-2.78329	0.796908	-3.49261	0.000478318	0.000728561
ENSG00000019144.21	ENST00000525226.5	79.5871	0.261201	0.319377	0.817844	0.413446	0.450424
ENSG00000019169.12	ENST00000958834.1	2.19062	5.83621	5.97179	0.977296	0.328423	0.364243
ENSG00000019485.15	ENST00000622142.5	160.348	-0.763415	0.281081	-2.71599	0.00660773	0.00907235
ENSG00000019505.8	ENST00000528101.1	3.12371	6.60441	2.75445	2.39773	0.0164971	0.0217716
ENSG00000019549.13	ENST00000396822.6	155.623	-4.00166	0.472855	-8.46276	2.61129e-17	7.97523e-17
ENSG00000019582.18	ENST00000377795.7	57.4095	3.86705	0.395149	9.78632	1.28906e-22	4.68197e-22
ENSG00000019991.18	ENST00000453018.1	1.45519	2.18254	2.7661	0.789032	0.430093	0.467074
ENSG00000019995.6	ENST00000471421.1	103.446	-0.106903	0.295767	-0.361443	0.717768	0.744265
ENSG00000020129.17	ENST00000459931.1	219.47	-3.37119	0.37359	-9.02377	1.81724e-19	5.9781e-19
ENSG00000020181.19	ENST00000428068.5	1988.59	5.8695	0.138932	42.2472	0	0
ENSG00000020256.21	ENST00000371523.8	266.416	-1.94597	0.290841	-6.69083	2.21901e-11	5.25623e-11
ENSG00000020426.12	ENST00000557134.1	1471.68	1.65421	0.194266	8.51519	1.66315e-17	5.117e-17
ENSG00000020577.15	ENST00000673833.1	19.6665	-2.00702	0.851129	-2.35807	0.0183701	0.0241067
ENSG00000020633.19	ENST00000479341.1	353.054	5.6702	0.249448	22.7309	2.21545e-114	4.495e-113
ENSG00000020922.14	ENST00000535120.1	35.6298	-2.17112	0.632249	-3.43397	0.000594809	0.000899103
ENSG00000021300.14	ENST00000544282.1	17.5584	-3.67965	1.1929	-3.08464	0.002038	0.00294078
ENSG00000021355.14	ENST00000468511.5	42.7476	-3.1708	0.73736	-4.30021	1.70636e-05	2.90447e-05
ENSG00000021461.19	ENST00000631161.2	14.1489	5.01942	0.994077	5.04933	4.43364e-07	8.38691e-07
ENSG00000021488.14	ENST00000879211.1	66.3944	4.20758	0.37584	11.1951	4.30676e-29	1.91672e-28
ENSG00000021574.16	ENST00000645550.1	29.8897	-2.75506	0.957925	-2.87607	0.00402662	0.00564982
ENSG00000021645.20	ENST00000556088.1	969.339	5.06769	0.179103	28.2949	3.99827e-176	1.60213e-174
ENSG00000021762.21	ENST00000477622.1	31.566	1.11884	0.612845	1.82565	0.0679028	0.0833532
ENSG00000021776.12	ENST00000559767.1	173.521	-2.00712	0.334837	-5.99433	2.04324e-09	4.38836e-09
ENSG00000021826.19	ENST00000479988.1	144.578	-5.24499	0.746689	-7.02433	2.15103e-12	5.33963e-12
ENSG00000021852.15	ENST00000875305.1	10.65	1.9833	1.1737	1.68979	0.091069	0.109912
[truncated: 17,815 more rows]

## Sheet: OSCHX_hiAPGC-vs-Conv-Exon
Gene ID	Transcript ID	baseMean	log2FoldChange	lfcSE	stat	pvalue	padj
[truncated: 18,168 more rows]

[truncated: 4 more sheets: Ctrl_SERIPH2nd-vs-1st-Unsplice, Ctrl_hiAPGC-vs-Conv-Unsplice, OSCHX_SERIPH2nd-vs-1st-Unsplice, OSCHX_hiAPGC-vs-Conv-Unsplice]
