# Supplementary material
Source: HighWire-hosted journal article supplement (doi:10.1101/rna.081061.126)
Supplement: Supplemental_Table_S2.xlsx [file Supplemental_Table_S2.xlsx]

## Sheet: index
sheet	file	path
Ctrl_Conv_1.dogs	Ctrl_Conv_1.dogs.bed	./dog_bed/Ctrl_Conv_1.dogs.bed
Ctrl_Conv_2.dogs	Ctrl_Conv_2.dogs.bed	./dog_bed/Ctrl_Conv_2.dogs.bed
Ctrl_Impr_1.dogs	Ctrl_Impr_1.dogs.bed	./dog_bed/Ctrl_Impr_1.dogs.bed
Ctrl_Impr_2.dogs	Ctrl_Impr_2.dogs.bed	./dog_bed/Ctrl_Impr_2.dogs.bed
Ctrl_SERIPH1st_1.dogs	Ctrl_SERIPH1st_1.dogs.bed	./dog_bed/Ctrl_SERIPH1st_1.dogs.bed
Ctrl_SERIPH1st_2.dogs	Ctrl_SERIPH1st_2.dogs.bed	./dog_bed/Ctrl_SERIPH1st_2.dogs.bed
Ctrl_SERIPH2nd_1.dogs	Ctrl_SERIPH2nd_1.dogs.bed	./dog_bed/Ctrl_SERIPH2nd_1.dogs.bed
Ctrl_SERIPH2nd_2.dogs	Ctrl_SERIPH2nd_2.dogs.bed	./dog_bed/Ctrl_SERIPH2nd_2.dogs.bed
OSCHX_Conv_1.dogs	OSCHX_Conv_1.dogs.bed	./dog_bed/OSCHX_Conv_1.dogs.bed
OSCHX_Conv_2.dogs	OSCHX_Conv_2.dogs.bed	./dog_bed/OSCHX_Conv_2.dogs.bed
OSCHX_Impr_1.dogs	OSCHX_Impr_1.dogs.bed	./dog_bed/OSCHX_Impr_1.dogs.bed
OSCHX_Impr_2.dogs	OSCHX_Impr_2.dogs.bed	./dog_bed/OSCHX_Impr_2.dogs.bed
OSCHX_SERIPH1st_1.dogs	OSCHX_SERIPH1st_1.dogs.bed	./dog_bed/OSCHX_SERIPH1st_1.dogs.bed
OSCHX_SERIPH1st_2.dogs	OSCHX_SERIPH1st_2.dogs.bed	./dog_bed/OSCHX_SERIPH1st_2.dogs.bed
OSCHX_SERIPH2nd_1.dogs	OSCHX_SERIPH2nd_1.dogs.bed	./dog_bed/OSCHX_SERIPH2nd_1.dogs.bed
OSCHX_SERIPH2nd_2.dogs	OSCHX_SERIPH2nd_2.dogs.bed	./dog_bed/OSCHX_SERIPH2nd_2.dogs.bed

## Sheet: Ctrl_Conv_1.dogs
chromosome	start	end	gene_id	unused_field	strand
chr1	169855456	169870456	ENSG00000000460.18	0	+
chr7	141655244	141665244	ENSG00000006530.19	0	+
chr6	16151367	16161367	ENSG00000007944.16	0	+
chr1	231355023	231365023	ENSG00000010072.17	0	+
chr17	32381885	32396885	ENSG00000010244.20	0	+
chr6	122433119	122443119	ENSG00000025156.14	0	+
chr12	95302799	95312799	ENSG00000028203.20	0	+
chr5	55426065	55436065	ENSG00000039123.17	0	+
chr6	1613897	1633897	ENSG00000054598.9	0	+
chr1	109600195	109610195	ENSG00000065135.13	0	+
chr2	186511929	186521929	ENSG00000065548.20	0	+
chr1	42703805	42718805	ENSG00000065978.20	0	+
chr6	126203817	126213817	ENSG00000066651.21	0	+
chr4	5814305	5829305	ENSG00000072840.14	0	+
chr5	257083	267083	ENSG00000073578.19	0	+
chr2	71437183	71447183	ENSG00000075292.21	0	+
chr2	171750158	171770158	ENSG00000077380.17	0	+
chr4	40158252	40168252	ENSG00000078177.16	0	+
chr2	216206303	216221303	ENSG00000079246.17	0	+
chr8	11839500	11849500	ENSG00000079459.15	0	+
chr1	113685923	113695923	ENSG00000081026.20	0	+
chr17	48061545	48071545	ENSG00000082641.17	0	+
chr1	46278482	46288482	ENSG00000085999.14	0	+
chr2	117832379	117842379	ENSG00000088205.14	0	+
chr15	43868414	43883414	ENSG00000092470.13	0	+
chr10	92031437	92041437	ENSG00000095564.16	0	+
chr22	35425431	35455431	ENSG00000100297.17	0	+
chr14	96954846	96964846	ENSG00000100749.10	0	+
chrX	76178755	76193755	ENSG00000102390.13	0	+
chr16	682870	692870	ENSG00000103266.12	0	+
chr15	65891989	65911989	ENSG00000103769.11	0	+
chr8	85481493	85491493	ENSG00000104267.11	0	+
chr8	30183639	30198639	ENSG00000104671.9	0	+
chr8	15766649	15786649	ENSG00000104723.22	0	+
chr19	30016612	30041612	ENSG00000105176.19	0	+
chr7	24694193	24714193	ENSG00000105926.17	0	+
chr7	139191986	139201986	ENSG00000105948.14	0	+
chr9	5776557	5786557	ENSG00000107036.13	0	+
chr9	35758600	35768600	ENSG00000107185.11	0	+
chr10	111017307	111027307	ENSG00000108061.14	0	+
chr10	58399220	58409220	ENSG00000108064.12	0	+
chr4	41960803	41970803	ENSG00000109133.15	0	+
chr4	108632886	108642886	ENSG00000109475.19	0	+
chr4	177362936	177372936	ENSG00000109674.5	0	+
chr4	17844865	17854865	ENSG00000109805.11	0	+
chr12	122062044	122077044	ENSG00000110987.10	0	+
chr12	118033545	118043545	ENSG00000111445.15	0	+
chr12	101744140	101754140	ENSG00000111666.12	0	+
chr6	36605911	36615911	ENSG00000112081.19	0	+
chr6	133532128	133542128	ENSG00000112319.22	0	+
chr5	667168	677168	ENSG00000112877.9	0	+
chr5	44820428	44840428	ENSG00000112996.12	0	+
chr5	80877147	80887147	ENSG00000113318.12	0	+
chr5	33469531	33479531	ENSG00000113407.15	0	+
chr1	117107453	117117453	ENSG00000116830.13	0	+
chr1	93369493	93384493	ENSG00000117505.14	0	+
chr6	108684774	108699774	ENSG00000118689.16	0	+
chr13	75607472	75617472	ENSG00000118939.20	0	+
chr9	124353307	124363307	ENSG00000119408.18	0	+
chr9	4885917	4895917	ENSG00000120158.12	0	+
chr10	58289586	58304586	ENSG00000122873.13	0	+
chr1	50974634	51014634	ENSG00000123080.13	0	+
chr6	110895714	110905714	ENSG00000123505.21	0	+
chr5	151492379	151502379	ENSG00000123643.15	0	+
chr20	49097015	49107015	ENSG00000124207.18	0	+
chr6	2786952	2796952	ENSG00000124535.17	0	+
chr9	136929221	136939221	ENSG00000127191.20	0	+
chr15	40394288	40404288	ENSG00000128944.14	0	+
chr7	56080670	56090670	ENSG00000129103.20	0	+
chr4	176332245	176342245	ENSG00000129128.13	0	+
chr22	45845307	45855307	ENSG00000130638.18	0	+
chr17	67744531	67754531	ENSG00000130935.11	0	+
chr1	147295767	147305767	ENSG00000131778.21	0	+
chr11	6484683	6494683	ENSG00000132286.13	0	+
chr13	36829104	36844104	ENSG00000133111.4	0	+
chr11	34147670	34157670	ENSG00000135372.11	0	+
chr1	229660887	229670887	ENSG00000135763.11	0	+
chr2	218755416	218765416	ENSG00000135912.12	0	+
chr2	159771027	159781027	ENSG00000136536.16	0	+
chr10	17716824	17726824	ENSG00000136738.16	0	+
chr9	97673748	97683748	ENSG00000136937.14	0	+
chr9	37503701	37513701	ENSG00000137054.17	0	+
chr2	24822376	24832376	ENSG00000138092.12	0	+
chr10	68694586	68704586	ENSG00000138336.10	0	+
chr2	215349773	215369773	ENSG00000138363.16	0	+
chr3	122881139	122891139	ENSG00000138463.10	0	+
chr12	34029694	34039694	ENSG00000139133.7	0	+
chr13	77764242	77779242	ENSG00000139737.23	0	+
chr14	51257655	51267655	ENSG00000139921.14	0	+
chr15	89631056	89641056	ENSG00000140534.15	0	+
chr16	2603190	2613190	ENSG00000140992.21	0	+
chr1	23696835	23706835	ENSG00000142676.15	0	+
chr1	165911618	165931618	ENSG00000143179.17	0	+
chr1	161363206	161378206	ENSG00000143252.18	0	+
chr1	219220700	219235700	ENSG00000143353.13	0	+
chr1	225790670	225800670	ENSG00000143742.15	0	+
chr4	82461177	82471177	ENSG00000145293.18	0	+
chr5	151812911	151832911	ENSG00000145907.17	0	+
chr2	241225993	241245993	ENSG00000146205.16	0	+
chr8	41545030	41555030	ENSG00000147536.12	0	+
chr8	73048123	73068123	ENSG00000147601.16	0	+
chr11	43857741	43867741	ENSG00000149084.14	0	+
chr10	112818744	112828744	ENSG00000151532.16	0	+
chr4	44700928	44710928	ENSG00000151806.15	0	+
chr2	172608669	172618669	ENSG00000152256.15	0	+
chr10	14904315	14914315	ENSG00000152455.17	0	+
chr10	123170467	123205467	ENSG00000154473.19	0	+
chr8	91087095	91097095	ENSG00000155100.12	0	+
chr21	15880064	15895064	ENSG00000155313.17	0	+
chr5	154817605	154842605	ENSG00000155506.20	0	+
chr15	59125045	59140045	ENSG00000157456.9	0	+
chr9	114646422	114656422	ENSG00000157693.16	0	+
chr16	67929676	67939676	ENSG00000159792.10	0	+
chr2	60931612	60941612	ENSG00000162924.17	0	+
chr2	183163114	183213114	ENSG00000163002.14	0	+
chr2	108885477	108895477	ENSG00000163006.13	0	+
chr3	155944020	155954020	ENSG00000163655.17	0	+
chr1	42852477	42862477	ENSG00000164011.19	0	+
chr8	103443579	103453579	ENSG00000164934.16	0	+
chr12	12471233	12486233	ENSG00000165714.12	0	+
chr11	94876748	94891748	ENSG00000166025.19	0	+
chr10	100559998	100569998	ENSG00000166135.15	0	+
chr11	74842413	74862413	ENSG00000166439.7	0	+
chr19	44178381	44198381	ENSG00000167380.18	0	+
chr19	43852017	43862017	ENSG00000167637.18	0	+
chr19	4445018	4455018	ENSG00000167670.17	0	+
chr11	61446839	61471839	ENSG00000167985.9	0	+
chr6	57059041	57084041	ENSG00000168116.16	0	+
chr1	229305894	229325894	ENSG00000168118.13	0	+
chr4	26435131	26445131	ENSG00000168214.23	0	+
chr5	34958964	34968964	ENSG00000168724.19	0	+
chr3	158695836	158720836	ENSG00000168827.16	0	+
chr4	37863028	37873028	ENSG00000169299.15	0	+
chr15	78595269	78605269	ENSG00000169684.14	0	+
chr1	1311677	1321677	ENSG00000169972.14	0	+
chr3	44660791	44670791	ENSG00000169981.12	0	+
chr10	60796236	60811236	ENSG00000170312.18	0	+
chr17	16382745	16392745	ENSG00000170315.15	0	+
chr15	38487710	38507710	ENSG00000171262.11	0	+
chr17	792509	802509	ENSG00000171861.12	0	+
chr15	84627796	84647796	ENSG00000176371.15	0	+
chr19	57330770	57340770	ENSG00000178229.9	0	+
chr17	8270491	8280491	ENSG00000178921.15	0	+
chr1	28539300	28549300	ENSG00000180198.18	0	+
chr7	30370457	30390457	ENSG00000180233.12	0	+
chr8	25507911	25517911	ENSG00000184661.15	0	+
chrX	155123077	155133077	ENSG00000185515.16	0	+
chr15	78903078	78913078	ENSG00000185787.17	0	+
chr19	57447101	57457101	ENSG00000186230.7	0	+
chr19	57421934	57431934	ENSG00000186272.14	0	+
chr1	40464142	40474142	ENSG00000187801.16	0	+
chr1	147993592	148003592	ENSG00000188092.16	0	+
chr19	9351162	9366162	ENSG00000188321.15	0	+
chr7	64833681	64843681	ENSG00000197008.10	0	+
chr7	149183042	149193042	ENSG00000197024.10	0	+
chr12	53481162	53491162	ENSG00000197111.17	0	+
chr12	104350307	104360307	ENSG00000198431.18	0	+
chr19	57865117	57875117	ENSG00000198466.13	0	+
chr4	163520733	163540733	ENSG00000198498.11	0	+
chr2	104858574	104868574	ENSG00000198914.5	0	+
chr6	126348875	126368875	ENSG00000203760.10	0	+
chr1	52894998	52904998	ENSG00000203995.11	0	+
chr19	57717301	57732301	ENSG00000204519.11	0	+
chr8	80526265	80541265	ENSG00000205189.14	0	+
chr1	168253021	168263021	ENSG00000213064.11	0	+
chr19	24129968	24144968	ENSG00000213096.11	0	+
chr1	109096935	109106935	ENSG00000215717.8	0	+
chr7	102809552	102834552	ENSG00000222011.10	0	+
chr17	81241310	81251310	ENSG00000224877.4	0	+
chr12	66134449	66144449	ENSG00000239335.4	0	+
chr3	10294903	10309903	ENSG00000240288.8	0	+
chr2	197708395	197718395	ENSG00000247626.5	0	+
chr12	54122235	54137235	ENSG00000249388.4	0	+
chr3	101685669	101700669	ENSG00000256628.6	0	+
chr14	64944591	64954591	ENSG00000258289.11	0	+
chr1	149839767	149849767	ENSG00000270882.3	0	+
chr15	30649529	30694529	ENSG00000285077.4	0	+
chr10	46815125	46825125	ENSG00000291069.2	0	+
chr9	92838458	92848458	ENSG00000291168.2	0	+
chr16	30275017	30285017	ENSG00000291266.2	0	-
chr17	64921424	64966424	ENSG00000291140.2	0	-
chr9	96875845	96885845	ENSG00000290770.2	0	-
chr7	102527918	102537918	ENSG00000284981.2	0	-
chr1	149844044	149854044	ENSG00000270276.3	0	-
chr7	102627024	102637024	ENSG00000267368.2	0	-
chr14	30402074	30412074	ENSG00000257636.7	0	-
chr14	24199614	24209614	ENSG00000254505.12	0	-
chr8	90948083	90958083	ENSG00000253250.4	0	-
chr19	12515372	12525372	ENSG00000249709.8	0	-
chr17	18660750	18680750	ENSG00000240445.6	0	-
chr17	15426014	15436014	ENSG00000239704.13	0	-
chrX	73805648	73820648	ENSG00000229807.15	0	-
chr2	27060469	27070469	ENSG00000228474.7	0	-
chr7	102645367	102665367	ENSG00000228049.8	0	-
chr19	54426708	54436708	ENSG00000226696.9	0	-
chr10	49434167	49454167	ENSG00000225830.17	0	-
chr5	160383147	160393147	ENSG00000221886.5	0	-
chr15	72330923	72340923	ENSG00000213614.12	0	-
chr22	42048333	42058333	ENSG00000198951.13	0	-
chr21	28918143	28928143	ENSG00000198862.15	0	-
chr5	37071227	37106227	ENSG00000197603.17	0	-
chr9	96800489	96815489	ENSG00000196597.14	0	-
chr1	117838484	117863484	ENSG00000196505.12	0	-
chr19	37725832	37735832	ENSG00000189144.16	0	-
chr6	143412831	143422831	ENSG00000189007.17	0	-
chr4	42100852	42110852	ENSG00000188848.17	0	-
chr9	137233583	137243583	ENSG00000188163.8	0	-
chrX	57073550	57118550	ENSG00000186787.11	0	-
chr10	74110254	74120254	ENSG00000185009.14	0	-
chr15	101591443	101621443	ENSG00000184277.14	0	-
chr8	93713154	93728154	ENSG00000183808.13	0	-
chr17	81877834	81887834	ENSG00000183684.9	0	-
chr21	39164768	39174768	ENSG00000183527.13	0	-
chr14	59419021	59429021	ENSG00000181619.12	0	-
chrX	14655387	14690387	ENSG00000181544.17	0	-
chr17	202388	212388	ENSG00000181031.17	0	-
chr6	44092289	44112289	ENSG00000180992.8	0	-
chr16	30408614	30423614	ENSG00000179958.10	0	-
chr17	734420	744420	ENSG00000179409.11	0	-
chr15	74620556	74630556	ENSG00000179151.14	0	-
chr19	57788840	57803840	ENSG00000178935.5	0	-
chr15	74909790	74919790	ENSG00000178741.13	0	-
chr2	95811918	95836918	ENSG00000174501.15	0	-
chr12	94276448	94306448	ENSG00000173588.17	0	-
chr10	94323225	94333225	ENSG00000173145.12	0	-
chr4	83251535	83261535	ENSG00000173085.15	0	-
chr7	64499877	64519877	ENSG00000173041.13	0	-
chr3	129371320	129401320	ENSG00000172771.13	0	-
chr8	33360823	33370823	ENSG00000172728.17	0	-
chr3	178950120	178960120	ENSG00000172667.12	0	-
chr2	42427016	42442016	ENSG00000171126.8	0	-
chr8	10886044	10896044	ENSG00000171044.11	0	-
chr15	33848781	33858781	ENSG00000169857.10	0	-
chr2	110626332	110636332	ENSG00000169679.16	0	-
chr15	75583082	75598082	ENSG00000169371.15	0	-
chr7	40111026	40126026	ENSG00000168303.9	0	-
chr10	117267273	117277273	ENSG00000165650.13	0	-
chr11	126192094	126202094	ENSG00000165526.10	0	-
chr8	103373634	103398634	ENSG00000164933.13	0	-
chr7	21879973	21899973	ENSG00000164649.21	0	-
chr7	107186371	107201371	ENSG00000164597.16	0	-
chr5	127035234	127045234	ENSG00000164241.14	0	-
chr4	173321375	173331375	ENSG00000164104.13	0	-
chr3	47485639	47495639	ENSG00000163832.17	0	-
chr3	108539863	108549863	ENSG00000163507.16	0	-
chr1	151144747	151159747	ENSG00000163155.12	0	-
chr2	31850059	31865059	ENSG00000162959.15	0	-
chr1	77934054	77944054	ENSG00000162613.19	0	-
chr16	31406	46406	ENSG00000161980.7	0	-
chr19	40309535	40319535	ENSG00000160392.15	0	-
chr21	42828012	42843012	ENSG00000160193.13	0	-
chr3	138041986	138061986	ENSG00000158163.16	0	-
chr1	111105883	111115883	ENSG00000156171.16	0	-
chr1	112901846	112911846	ENSG00000155380.14	0	-
chr21	25560631	25585631	ENSG00000154719.15	0	-
chr1	244830637	244840637	ENSG00000153187.22	0	-
chr11	107306600	107321600	ENSG00000152404.17	0	-
chr5	10205506	10225506	ENSG00000150756.15	0	-
chr11	108140279	108155279	ENSG00000149308.19	0	-
chr8	22610417	22620417	ENSG00000147439.15	0	-
chr7	158618223	158628223	ENSG00000146918.21	0	-
chr7	12315200	12330200	ENSG00000146530.16	0	-
chr6	87503458	87513458	ENSG00000146282.20	0	-
chr4	163100072	163110072	ENSG00000145414.10	0	-
chr2	73741781	73761781	ENSG00000144048.13	0	-
chr1	156710795	156720795	ENSG00000143319.19	0	-
chr1	67397809	67407809	ENSG00000142864.16	0	-
chr19	36309452	36334452	ENSG00000142065.15	0	-
chr12	31265583	31280583	ENSG00000139146.15	0	-
chr4	82341522	82351522	ENSG00000138668.21	0	-
chr11	111716907	111726907	ENSG00000137713.17	0	-
chr9	97659908	97674908	ENSG00000136936.12	0	-
chr9	100292071	100302071	ENSG00000136891.15	0	-
chr17	57970918	58000918	ENSG00000136450.13	0	-
chr7	47951881	47961881	ENSG00000136273.15	0	-
chr1	180957711	180972711	ENSG00000135823.14	0	-
chr6	138888492	138903492	ENSG00000135597.20	0	-
chr6	109351513	109366513	ENSG00000135535.18	0	-
chr6	85587778	85607778	ENSG00000135316.20	0	-
chr9	83637385	83657385	ENSG00000135018.15	0	-
chr15	34130364	34140364	ENSG00000134152.12	0	-
chr14	70571256	70581256	ENSG00000133997.13	0	-
chr12	92120277	92140277	ENSG00000133639.6	0	-
chr13	45318470	45333470	ENSG00000133112.18	0	-
chr1	71053250	71063250	ENSG00000132485.15	0	-
chr7	50434127	50444127	ENSG00000132436.14	0	-
chr11	6585071	6595071	ENSG00000132275.12	0	-
chr16	85656197	85676197	ENSG00000131153.10	0	-
chr6	149494494	149504494	ENSG00000131013.5	0	-
chr1	25821912	25831912	ENSG00000127423.11	0	-
chr14	55138109	55148109	ENSG00000126787.14	0	-
chr14	60633420	60643420	ENSG00000126778.13	0	-
chr1	23278770	23303770	ENSG00000125944.23	0	-
chr16	58509950	58519950	ENSG00000125107.20	0	-
chr5	65487765	65517765	ENSG00000123219.14	0	-
chr12	113806737	113816737	ENSG00000122965.12	0	-
chr10	73105154	73130154	ENSG00000122882.12	0	-
chr1	90890297	90915297	ENSG00000122482.23	0	-
chr13	19664751	19674751	ENSG00000121390.20	0	-
chr12	101383115	101393115	ENSG00000120805.15	0	-
chr8	109210918	109240918	ENSG00000120526.13	0	-
chr9	112200070	112215070	ENSG00000119314.18	0	-
chr1	236534004	236549004	ENSG00000119285.12	0	-
chr6	145783501	145793501	ENSG00000118496.6	0	-
chr15	80936288	80946288	ENSG00000117899.12	0	-
chr1	119015283	119030283	ENSG00000116874.13	0	-
chr1	66989349	66999349	ENSG00000116704.9	0	-
chr1	111429889	111439889	ENSG00000116455.14	0	-
chr2	175062249	175072249	ENSG00000115966.19	0	-
chr2	99308981	99318981	ENSG00000115514.13	0	-
chr3	156524552	156539552	ENSG00000114850.8	0	-
chr3	131447201	131462201	ENSG00000114686.10	0	-
chr3	167668297	167683297	ENSG00000114209.16	0	-
chr15	25323727	25333727	ENSG00000114062.23	0	-
chr6	110089816	110099816	ENSG00000112290.14	0	-
chr6	98858534	98868534	ENSG00000112234.10	0	-
chr6	122433347	122443347	ENSG00000111897.8	0	-
chr6	118803441	118813441	ENSG00000111877.19	0	-
chr12	10589189	10604189	ENSG00000111196.12	0	-
chr11	90185428	90200428	ENSG00000110172.13	0	-
chr11	47606696	47616696	ENSG00000109919.11	0	-
chr4	24507440	24517440	ENSG00000109606.14	0	-
chr17	50347856	50367856	ENSG00000108826.17	0	-
chr17	19894301	19904301	ENSG00000108599.16	0	-
chr10	30299800	30309800	ENSG00000107951.16	0	-
chr9	112030776	112040776	ENSG00000106868.18	0	-
chr7	128287684	128297684	ENSG00000106344.9	0	-
chr19	39815349	39825349	ENSG00000105204.14	0	-
chr8	65592455	65602455	ENSG00000104442.11	0	-
chr16	19691936	19701936	ENSG00000103550.15	0	-
chr20	34260267	34280267	ENSG00000101444.13	0	-
chr22	29495878	29505878	ENSG00000100296.15	0	-
chr14	21197374	21207374	ENSG00000092199.20	0	-
chr20	2471816	2481816	ENSG00000088876.14	0	-
chr5	154877410	154887410	ENSG00000082516.9	0	-
chr19	49325584	49340584	ENSG00000074219.15	0	-
chr3	185633129	185643129	ENSG00000073792.17	0	-
chr12	270056	280056	ENSG00000073614.13	0	-
chr1	205697821	205712821	ENSG00000069275.14	0	-
chr1	212353925	212363925	ENSG00000065600.14	0	-
chr12	26894249	26904249	ENSG00000064102.16	0	-
chr19	44316554	44326554	ENSG00000062370.18	0	-
chr1	19291990	19301990	ENSG00000053371.14	0	-
chr3	121416425	121431425	ENSG00000051341.16	0	-
chr11	6201334	6211334	ENSG00000051009.12	0	-
chr6	42196693	42206693	ENSG00000048544.8	0	-
chr1	244398493	244408493	ENSG00000035687.10	0	-
chr6	155241133	155256133	ENSG00000029639.12	0	-
chr12	47651248	47661248	ENSG00000005175.11	0	-
chr1	32997985	33007985	ENSG00000004455.19	0	-
chr7	92182497	92197497	ENSG00000001631.18	0	-

## Sheet: Ctrl_Conv_2.dogs
chromosome	start	end	gene_id	unused_field	strand
chr1	169855456	169865456	ENSG00000000460.18	0	+
chr7	141655244	141665244	ENSG00000006530.19	0	+
chr1	231355023	231365023	ENSG00000010072.17	0	+
chr17	32381885	32396885	ENSG00000010244.20	0	+
chr6	122433119	122443119	ENSG00000025156.14	0	+
chr22	50524780	50534780	ENSG00000025770.20	0	+
chr12	95302799	95312799	ENSG00000028203.20	0	+
chr6	1613897	1633897	ENSG00000054598.9	0	+
chr2	186511929	186526929	ENSG00000065548.20	0	+
chr1	42703805	42718805	ENSG00000065978.20	0	+
chr1	22101360	22116360	ENSG00000070831.19	0	+
chr4	5814305	5829305	ENSG00000072840.14	0	+
chr5	257083	267083	ENSG00000073578.19	0	+
chr4	40158252	40168252	ENSG00000078177.16	0	+
chr2	216206303	216221303	ENSG00000079246.17	0	+
chr8	11839500	11849500	ENSG00000079459.15	0	+
chr1	113685923	113695923	ENSG00000081026.20	0	+
chr17	48061545	48071545	ENSG00000082641.17	0	+
chr1	40423326	40433326	ENSG00000084070.13	0	+
chr5	78480739	78490739	ENSG00000085365.19	0	+
chr1	46278482	46288482	ENSG00000085999.14	0	+
chr2	117832379	117842379	ENSG00000088205.14	0	+
chr15	43868414	43878414	ENSG00000092470.13	0	+
chr17	76781449	76791449	ENSG00000092931.13	0	+
chr10	92031437	92041437	ENSG00000095564.16	0	+
chr22	35425431	35445431	ENSG00000100297.17	0	+
chr14	96954846	96964846	ENSG00000100749.10	0	+
chrX	76178755	76193755	ENSG00000102390.13	0	+
chr16	682870	692870	ENSG00000103266.12	0	+
chr15	65891989	65906989	ENSG00000103769.11	0	+
chr8	85481493	85491493	ENSG00000104267.11	0	+
chr8	30183639	30198639	ENSG00000104671.9	0	+
chr8	15766649	15786649	ENSG00000104723.22	0	+
chr19	30016612	30046612	ENSG00000105176.19	0	+
chr7	24694193	24714193	ENSG00000105926.17	0	+
chr7	139191986	139201986	ENSG00000105948.14	0	+
chr10	111017307	111027307	ENSG00000108061.14	0	+
chr10	58399220	58409220	ENSG00000108064.12	0	+
chr4	108632886	108642886	ENSG00000109475.19	0	+
chr4	177362936	177372936	ENSG00000109674.5	0	+
chr4	17844865	17854865	ENSG00000109805.11	0	+
chr12	122062044	122077044	ENSG00000110987.10	0	+
chr12	101744140	101754140	ENSG00000111666.12	0	+
chr6	36605911	36615911	ENSG00000112081.19	0	+
chr6	133532128	133542128	ENSG00000112319.22	0	+
chr5	667168	677168	ENSG00000112877.9	0	+
chr5	44820428	44840428	ENSG00000112996.12	0	+
chr5	80877147	80887147	ENSG00000113318.12	0	+
chr5	33469531	33479531	ENSG00000113407.15	0	+
chr3	100748965	100758965	ENSG00000114354.16	0	+
chr1	117107453	117117453	ENSG00000116830.13	0	+
chr1	93369493	93384493	ENSG00000117505.14	0	+
chr6	108684774	108694774	ENSG00000118689.16	0	+
chr13	75607472	75617472	ENSG00000118939.20	0	+
chr9	116701300	116711300	ENSG00000119401.12	0	+
chr10	58289586	58299586	ENSG00000122873.13	0	+
chr1	50974634	51014634	ENSG00000123080.13	0	+
chr6	110895714	110905714	ENSG00000123505.21	0	+
chr5	151492379	151502379	ENSG00000123643.15	0	+
chr20	49097015	49107015	ENSG00000124207.18	0	+
chr9	136929221	136939221	ENSG00000127191.20	0	+
chr15	40394288	40404288	ENSG00000128944.14	0	+
chr4	176332245	176342245	ENSG00000129128.13	0	+
chr17	67744531	67754531	ENSG00000130935.11	0	+
chr1	147295767	147305767	ENSG00000131778.21	0	+
chr11	6484683	6494683	ENSG00000132286.13	0	+
chr13	36829104	36844104	ENSG00000133111.4	0	+
chr1	116990358	117000358	ENSG00000134247.11	0	+
chr11	34147670	34157670	ENSG00000135372.11	0	+
chr1	229660887	229670887	ENSG00000135763.11	0	+
chr2	218755416	218765416	ENSG00000135912.12	0	+
chr2	159771027	159781027	ENSG00000136536.16	0	+
chr10	17716824	17726824	ENSG00000136738.16	0	+
chr9	97673748	97683748	ENSG00000136937.14	0	+
chr9	37503701	37513701	ENSG00000137054.17	0	+
chr2	24822376	24832376	ENSG00000138092.12	0	+
chr10	68694586	68704586	ENSG00000138336.10	0	+
chr2	215349773	215369773	ENSG00000138363.16	0	+
chr3	122881139	122891139	ENSG00000138463.10	0	+
chr12	34029694	34039694	ENSG00000139133.7	0	+
chr13	77764242	77779242	ENSG00000139737.23	0	+
chr14	51257655	51277655	ENSG00000139921.14	0	+
chr15	89631056	89641056	ENSG00000140534.15	0	+
chr16	2603190	2613190	ENSG00000140992.21	0	+
chr17	68422731	68432731	ENSG00000141337.13	0	+
chr1	23696835	23706835	ENSG00000142676.15	0	+
chr1	93139079	93149079	ENSG00000143033.19	0	+
chr1	165911618	165931618	ENSG00000143179.17	0	+
chr1	161363206	161373206	ENSG00000143252.18	0	+
chr1	219220700	219235700	ENSG00000143353.13	0	+
chr1	212107400	212117400	ENSG00000143476.19	0	+
chr2	173368997	173383997	ENSG00000144354.16	0	+
chr5	151812911	151827911	ENSG00000145907.17	0	+
chr2	241225993	241245993	ENSG00000146205.16	0	+
chr8	41545030	41555030	ENSG00000147536.12	0	+
chr8	73048123	73068123	ENSG00000147601.16	0	+
chr11	43857741	43867741	ENSG00000149084.14	0	+
chr10	112818744	112828744	ENSG00000151532.16	0	+
chr4	44700928	44710928	ENSG00000151806.15	0	+
chr2	172608669	172618669	ENSG00000152256.15	0	+
chr10	14904315	14914315	ENSG00000152455.17	0	+
chr10	123170467	123205467	ENSG00000154473.19	0	+
chr8	91087095	91097095	ENSG00000155100.12	0	+
chr21	15880064	15895064	ENSG00000155313.17	0	+
chr5	154817605	154842605	ENSG00000155506.20	0	+
chr8	17302707	17312707	ENSG00000155975.11	0	+
chr15	59125045	59140045	ENSG00000157456.9	0	+
chr16	67929676	67944676	ENSG00000159792.10	0	+
chr5	179777283	179787283	ENSG00000161021.14	0	+
chr2	60931612	60941612	ENSG00000162924.17	0	+
chr2	183163114	183213114	ENSG00000163002.14	0	+
chr3	155944020	155954020	ENSG00000163655.17	0	+
chr8	103443579	103453579	ENSG00000164934.16	0	+
chr12	12471233	12481233	ENSG00000165714.12	0	+
chr11	94876748	94886748	ENSG00000166025.19	0	+
chr10	100559998	100569998	ENSG00000166135.15	0	+
chr19	44178381	44198381	ENSG00000167380.18	0	+
chr19	43852017	43862017	ENSG00000167637.18	0	+
chr19	4445018	4455018	ENSG00000167670.17	0	+
chr11	61446839	61461839	ENSG00000167985.9	0	+
chr6	57059041	57084041	ENSG00000168116.16	0	+
chr1	229305894	229325894	ENSG00000168118.13	0	+
chr4	26435131	26445131	ENSG00000168214.23	0	+
chr3	158695836	158705836	ENSG00000168827.16	0	+
chr4	37863028	37873028	ENSG00000169299.15	0	+
chr15	78595269	78605269	ENSG00000169684.14	0	+
chr1	1311677	1321677	ENSG00000169972.14	0	+
chr3	44660791	44670791	ENSG00000169981.12	0	+
chr10	60796236	60811236	ENSG00000170312.18	0	+
chr17	16382745	16392745	ENSG00000170315.15	0	+
chr15	38487710	38507710	ENSG00000171262.11	0	+
chr17	792509	802509	ENSG00000171861.12	0	+
chr11	66668380	66678380	ENSG00000173933.22	0	+
chr15	84627796	84647796	ENSG00000176371.15	0	+
chr19	57330770	57340770	ENSG00000178229.9	0	+
chr17	8270491	8280491	ENSG00000178921.15	0	+
chr1	28539300	28549300	ENSG00000180198.18	0	+
chr7	30370457	30390457	ENSG00000180233.12	0	+
chrX	155123077	155133077	ENSG00000185515.16	0	+
chr15	78903078	78913078	ENSG00000185787.17	0	+
chr19	57421934	57431934	ENSG00000186272.14	0	+
chr1	40464142	40474142	ENSG00000187801.16	0	+
chr1	147993592	148003592	ENSG00000188092.16	0	+
chr19	9351162	9361162	ENSG00000188321.15	0	+
chr7	64833681	64843681	ENSG00000197008.10	0	+
chr7	149183042	149193042	ENSG00000197024.10	0	+
chr19	57865117	57875117	ENSG00000198466.13	0	+
chr4	163520733	163540733	ENSG00000198498.11	0	+
chr2	237100474	237110474	ENSG00000198612.12	0	+
chr6	126348875	126368875	ENSG00000203760.10	0	+
chr1	52894998	52904998	ENSG00000203995.11	0	+
chr8	80526265	80541265	ENSG00000205189.14	0	+
chr19	24129968	24144968	ENSG00000213096.11	0	+
chr1	109096935	109106935	ENSG00000215717.8	0	+
chr7	102809552	102834552	ENSG00000222011.10	0	+
chr17	81241310	81251310	ENSG00000224877.4	0	+
chr12	66134449	66144449	ENSG00000239335.4	0	+
chr3	10294903	10309903	ENSG00000240288.8	0	+
chr2	197708395	197718395	ENSG00000247626.5	0	+
chr12	54122235	54137235	ENSG00000249388.4	0	+
chr7	27172207	27182207	ENSG00000253187.3	0	+
chr3	101685669	101700669	ENSG00000256628.6	0	+
chr1	149839767	149849767	ENSG00000270882.3	0	+
chr15	30649529	30689529	ENSG00000285077.4	0	+
chr16	30275017	30285017	ENSG00000291266.2	0	-
chr17	64921424	64966424	ENSG00000291140.2	0	-
chr1	149844044	149854044	ENSG00000270276.3	0	-
chr7	102627024	102637024	ENSG00000267368.2	0	-
chr14	30402074	30412074	ENSG00000257636.7	0	-
chr14	24199614	24209614	ENSG00000254505.12	0	-
chr8	90948083	90958083	ENSG00000253250.4	0	-
chr19	12515372	12525372	ENSG00000249709.8	0	-
chr17	18655750	18680750	ENSG00000240445.6	0	-
chr17	15426014	15436014	ENSG00000239704.13	0	-
chrX	73800648	73820648	ENSG00000229807.15	0	-
chr2	27060469	27070469	ENSG00000228474.7	0	-
chr10	49434167	49454167	ENSG00000225830.17	0	-
chr16	70226777	70246777	ENSG00000223496.3	0	-
chr15	72325923	72340923	ENSG00000213614.12	0	-
chr5	109324703	109334703	ENSG00000198961.12	0	-
chr22	42048333	42058333	ENSG00000198951.13	0	-
chr5	37071227	37106227	ENSG00000197603.17	0	-
chr8	30563317	30578317	ENSG00000197265.10	0	-
chr9	96780489	96815489	ENSG00000196597.14	0	-
chr1	117838484	117863484	ENSG00000196505.12	0	-
chr19	23211598	23221598	ENSG00000196081.10	0	-
chr19	37725832	37735832	ENSG00000189144.16	0	-
chrX	57073550	57118550	ENSG00000186787.11	0	-
chr17	1769484	1779484	ENSG00000186532.13	0	-
chr2	19886630	19896630	ENSG00000183891.7	0	-
chr8	93713154	93728154	ENSG00000183808.13	0	-
chr17	81877834	81887834	ENSG00000183684.9	0	-
chr21	39164768	39174768	ENSG00000183527.13	0	-
chr14	59419021	59429021	ENSG00000181619.12	0	-
chrX	14670387	14690387	ENSG00000181544.17	0	-
chr17	202388	212388	ENSG00000181031.17	0	-
chr6	44092289	44112289	ENSG00000180992.8	0	-
chr16	30408614	30423614	ENSG00000179958.10	0	-
chr17	734420	744420	ENSG00000179409.11	0	-
chr19	57788840	57803840	ENSG00000178935.5	0	-
chr15	74909790	74919790	ENSG00000178741.13	0	-
chr2	95806918	95836918	ENSG00000174501.15	0	-
chr12	94276448	94306448	ENSG00000173588.17	0	-
chr10	94323225	94333225	ENSG00000173145.12	0	-
chr7	64499877	64519877	ENSG00000173041.13	0	-
chr3	129376320	129401320	ENSG00000172771.13	0	-
chr8	33360823	33370823	ENSG00000172728.17	0	-
chr3	178950120	178960120	ENSG00000172667.12	0	-
chr2	42427016	42442016	ENSG00000171126.8	0	-
chr15	33848781	33858781	ENSG00000169857.10	0	-
chr2	110626332	110636332	ENSG00000169679.16	0	-
chr15	75583082	75598082	ENSG00000169371.15	0	-
chr7	40116026	40126026	ENSG00000168303.9	0	-
chr3	58417629	58427629	ENSG00000168291.14	0	-
chr10	117267273	117277273	ENSG00000165650.13	0	-
chr11	126192094	126202094	ENSG00000165526.10	0	-
chr8	103373634	103398634	ENSG00000164933.13	0	-
chr7	21884973	21899973	ENSG00000164649.21	0	-
chr7	107186371	107201371	ENSG00000164597.16	0	-
chr3	47485639	47495639	ENSG00000163832.17	0	-
chr3	108539863	108549863	ENSG00000163507.16	0	-
chr2	17653582	17663582	ENSG00000163029.17	0	-
chr2	31850059	31865059	ENSG00000162959.15	0	-
chr1	77934054	77944054	ENSG00000162613.19	0	-
chr16	31406	46406	ENSG00000161980.7	0	-
chr8	144501287	144511287	ENSG00000160957.16	0	-
chr21	42828012	42843012	ENSG00000160193.13	0	-
chr3	138041986	138061986	ENSG00000158163.16	0	-
chr21	28862190	28872190	ENSG00000156239.13	0	-
chr1	111100883	111115883	ENSG00000156171.16	0	-
chr21	25560631	25585631	ENSG00000154719.15	0	-
chr1	244830637	244840637	ENSG00000153187.22	0	-
chr11	107311600	107321600	ENSG00000152404.17	0	-
chr5	10205506	10225506	ENSG00000150756.15	0	-
chr11	108140279	108155279	ENSG00000149308.19	0	-
chr10	15768169	15778169	ENSG00000148481.15	0	-
chr8	22610417	22620417	ENSG00000147439.15	0	-
chr7	158608223	158628223	ENSG00000146918.21	0	-
chr7	12315200	12330200	ENSG00000146530.16	0	-
chr6	145854244	145864244	ENSG00000146414.18	0	-
chr6	87503458	87513458	ENSG00000146282.20	0	-
chr4	163100072	163110072	ENSG00000145414.10	0	-
chr2	73741781	73761781	ENSG00000144048.13	0	-
chr1	156710795	156720795	ENSG00000143319.19	0	-
chr1	175934827	175944827	ENSG00000143207.22	0	-
chr1	67397809	67407809	ENSG00000142864.16	0	-
chr19	36309452	36334452	ENSG00000142065.15	0	-
chr12	31265583	31280583	ENSG00000139146.15	0	-
chr4	82341522	82351522	ENSG00000138668.21	0	-
chr11	111716907	111726907	ENSG00000137713.17	0	-
chr9	97659908	97674908	ENSG00000136936.12	0	-
chr17	57970918	58000918	ENSG00000136450.13	0	-
chr7	47951881	47961881	ENSG00000136273.15	0	-
chr1	180957711	180972711	ENSG00000135823.14	0	-
chr6	109356513	109366513	ENSG00000135535.18	0	-
chr6	85587778	85607778	ENSG00000135316.20	0	-
chr9	83637385	83657385	ENSG00000135018.15	0	-
chr5	115603209	115613209	ENSG00000134970.15	0	-
chr15	34130364	34140364	ENSG00000134152.12	0	-
chr14	70571256	70581256	ENSG00000133997.13	0	-
chr12	92120277	92140277	ENSG00000133639.6	0	-
chr13	45323470	45333470	ENSG00000133112.18	0	-
chr1	71053250	71063250	ENSG00000132485.15	0	-
chr7	50434127	50444127	ENSG00000132436.14	0	-
chr11	6585071	6595071	ENSG00000132275.12	0	-
chr16	85661197	85676197	ENSG00000131153.10	0	-
chr6	149494494	149504494	ENSG00000131013.5	0	-
chrX	136203219	136213219	ENSG00000129680.17	0	-
chr1	25821912	25831912	ENSG00000127423.11	0	-
chr14	55138109	55148109	ENSG00000126787.14	0	-
chr1	23278770	23303770	ENSG00000125944.23	0	-
chr16	58509950	58519950	ENSG00000125107.20	0	-
chr5	65487765	65517765	ENSG00000123219.14	0	-
chr12	113806737	113816737	ENSG00000122965.12	0	-
chr10	73100154	73130154	ENSG00000122882.12	0	-
chr7	33004112	33014112	ENSG00000122643.25	0	-
chr1	90890297	90915297	ENSG00000122482.23	0	-
chr13	19664751	19674751	ENSG00000121390.20	0	-
chr12	101383115	101393115	ENSG00000120805.15	0	-
chr8	109210918	109240918	ENSG00000120526.13	0	-
chr9	112200070	112215070	ENSG00000119314.18	0	-
chr1	236534004	236549004	ENSG00000119285.12	0	-
chr6	145783501	145793501	ENSG00000118496.6	0	-
chr1	119015283	119030283	ENSG00000116874.13	0	-
chr1	66989349	66999349	ENSG00000116704.9	0	-
chr1	111429889	111439889	ENSG00000116455.14	0	-
chr2	99308981	99318981	ENSG00000115514.13	0	-
chr3	156524552	156539552	ENSG00000114850.8	0	-
chr3	131447201	131462201	ENSG00000114686.10	0	-
chr3	167668297	167683297	ENSG00000114209.16	0	-
chr15	25318727	25333727	ENSG00000114062.23	0	-
chr6	110084816	110099816	ENSG00000112290.14	0	-
chr6	98858534	98868534	ENSG00000112234.10	0	-
chr6	122433347	122443347	ENSG00000111897.8	0	-
chr6	118803441	118813441	ENSG00000111877.19	0	-
chr12	112016688	112026688	ENSG00000111300.11	0	-
chr12	10584189	10604189	ENSG00000111196.12	0	-
chr11	90190428	90200428	ENSG00000110172.13	0	-
chr4	24507440	24517440	ENSG00000109606.14	0	-
chr17	50357856	50367856	ENSG00000108826.17	0	-
chr17	19894301	19904301	ENSG00000108599.16	0	-
chr10	30299800	30309800	ENSG00000107951.16	0	-
chr10	117994915	118004915	ENSG00000107560.13	0	-
chr9	112030776	112040776	ENSG00000106868.18	0	-
chr7	128287684	128297684	ENSG00000106344.9	0	-
chr19	39815349	39825349	ENSG00000105204.14	0	-
chr8	65592455	65602455	ENSG00000104442.11	0	-
chr15	48702927	48712927	ENSG00000103995.14	0	-
chr16	19691936	19701936	ENSG00000103550.15	0	-
chr20	34260267	34280267	ENSG00000101444.13	0	-
chr22	29495878	29505878	ENSG00000100296.15	0	-
chr14	21197374	21207374	ENSG00000092199.20	0	-
chr20	2471816	2481816	ENSG00000088876.14	0	-
chr20	1358976	1368976	ENSG00000088832.19	0	-
chr15	66321190	66336190	ENSG00000075131.11	0	-
chr19	49325584	49340584	ENSG00000074219.15	0	-
chr3	185633129	185643129	ENSG00000073792.17	0	-
chr12	270056	280056	ENSG00000073614.13	0	-
chr1	205697821	205712821	ENSG00000069275.14	0	-
chr1	212353925	212363925	ENSG00000065600.14	0	-
chr16	75586867	75596867	ENSG00000065457.12	0	-
chr12	26889249	26904249	ENSG00000064102.16	0	-
chr19	44316554	44326554	ENSG00000062370.18	0	-
chr1	19291990	19301990	ENSG00000053371.14	0	-
chr3	121421425	121431425	ENSG00000051341.16	0	-
chr11	6201334	6211334	ENSG00000051009.12	0	-
chr1	244398493	244408493	ENSG00000035687.10	0	-
chr6	155241133	155256133	ENSG00000029639.12	0	-
chr1	32997985	33007985	ENSG00000004455.19	0	-
chr7	92182497	92197497	ENSG00000001631.18	0	-

## Sheet: Ctrl_hiAPGC_1.dogs
chromosome	start	end	gene_id	unused_field	strand
chr1	169855456	169870456	ENSG00000000460.18	0	+
chr7	141655244	141665244	ENSG00000006530.19	0	+
chr1	231355023	231365023	ENSG00000010072.17	0	+
chr17	32381885	32406885	ENSG00000010244.20	0	+
chr6	122433119	122443119	ENSG00000025156.14	0	+
chr12	95302799	95312799	ENSG00000028203.20	0	+
chr5	55426065	55436065	ENSG00000039123.17	0	+
chr15	40732344	40742344	ENSG00000051180.18	0	+
chr6	1613897	1633897	ENSG00000054598.9	0	+
chr2	202303666	202313666	ENSG00000055044.12	0	+
chr6	149591748	149601748	ENSG00000055211.15	0	+
chr10	68792377	68802377	ENSG00000060339.15	0	+
chr2	186511929	186521929	ENSG00000065548.20	0	+
chr1	42703805	42723805	ENSG00000065978.20	0	+
chr6	126203817	126398875	ENSG00000066651.21	0	+
chr11	612225	622225	ENSG00000070047.14	0	+
chr4	5814305	5829305	ENSG00000072840.14	0	+
chr5	257083	267083	ENSG00000073578.19	0	+
chr2	71437183	71447183	ENSG00000075292.21	0	+
chr14	103503831	103513831	ENSG00000075413.20	0	+
chr2	171750158	171775158	ENSG00000077380.17	0	+
chr4	40158252	40168252	ENSG00000078177.16	0	+
chr2	216206303	216221303	ENSG00000079246.17	0	+
chr8	11839500	11849500	ENSG00000079459.15	0	+
chr1	113685923	113695923	ENSG00000081026.20	0	+
chr17	48061545	48071545	ENSG00000082641.17	0	+
chr13	73017823	73027823	ENSG00000083535.17	0	+
chrX	55758774	55768774	ENSG00000083750.14	0	+
chr1	40423326	40433326	ENSG00000084070.13	0	+
chr6	161117385	161132385	ENSG00000085511.21	0	+
chr1	46278482	46288482	ENSG00000085999.14	0	+
chr2	117832379	117842379	ENSG00000088205.14	0	+
chr15	43868414	43893414	ENSG00000092470.13	0	+
chr17	76781449	76791449	ENSG00000092931.13	0	+
chr3	38421348	38436348	ENSG00000093217.12	0	+
chr9	105776629	105796629	ENSG00000095209.13	0	+
chr10	92031437	92041437	ENSG00000095564.16	0	+
chr22	35425431	35455431	ENSG00000100297.17	0	+
chr14	96954846	97009846	ENSG00000100749.10	0	+
chrX	102938300	102953300	ENSG00000102128.8	0	+
chrX	76178755	76193755	ENSG00000102390.13	0	+
chr16	682870	692870	ENSG00000103266.12	0	+
chr15	65891989	65911989	ENSG00000103769.11	0	+
chr15	44563029	44573029	ENSG00000104131.14	0	+
chr8	85481493	85491493	ENSG00000104267.11	0	+
chr8	30183639	30198639	ENSG00000104671.9	0	+
chr8	15766649	15786649	ENSG00000104723.22	0	+
chr19	46021318	46031318	ENSG00000104983.9	0	+
chr19	30016612	30056612	ENSG00000105176.19	0	+
chr7	24694193	24714193	ENSG00000105926.17	0	+
chr9	5776557	5786557	ENSG00000107036.13	0	+
chr9	35758600	35768600	ENSG00000107185.11	0	+
chr10	111017307	111027307	ENSG00000108061.14	0	+
chr10	58399220	58409220	ENSG00000108064.12	0	+
chr4	108632886	108647886	ENSG00000109475.19	0	+
chr4	177362936	177372936	ENSG00000109674.5	0	+
chr4	26756223	26771223	ENSG00000109680.12	0	+
chr4	17844865	17854865	ENSG00000109805.11	0	+
chr11	63957319	63972319	ENSG00000110583.14	0	+
chr12	122062044	122117044	ENSG00000110987.10	0	+
chr12	118033545	118043545	ENSG00000111445.15	0	+
chr12	101744140	101759140	ENSG00000111666.12	0	+
chr6	36605911	36615911	ENSG00000112081.19	0	+
chr6	133532128	133542128	ENSG00000112319.22	0	+
chr6	170572870	170582870	ENSG00000112592.16	0	+
chr5	667168	677168	ENSG00000112877.9	0	+
chr5	44820428	44835428	ENSG00000112996.12	0	+
chr5	80877147	80887147	ENSG00000113318.12	0	+
chr5	33469531	33479531	ENSG00000113407.15	0	+
chr3	100748965	100758965	ENSG00000114354.16	0	+
chr2	74970128	75130128	ENSG00000115350.13	0	+
chr1	117107453	117117453	ENSG00000116830.13	0	+
chr1	162601259	162611259	ENSG00000117143.15	0	+
chr1	145670980	145680980	ENSG00000117262.20	0	+
chr1	93369493	93384493	ENSG00000117505.14	0	+
chr1	96823738	96833738	ENSG00000117569.21	0	+
chr6	108684774	108709774	ENSG00000118689.16	0	+
chr13	75607472	75702472	ENSG00000118939.20	0	+
chr9	107332192	107342192	ENSG00000119318.14	0	+
chr2	32316594	32336594	ENSG00000119820.12	0	+
chr9	4885917	4895917	ENSG00000120158.12	0	+
chr1	31365527	31375527	ENSG00000121766.17	0	+
chr10	58289586	58299586	ENSG00000122873.13	0	+
chr1	50974634	51014634	ENSG00000123080.13	0	+
chr6	110895714	110905714	ENSG00000123505.21	0	+
chrX	13710504	13720504	ENSG00000123595.9	0	+
chr5	151492379	151507379	ENSG00000123643.15	0	+
chr20	49097015	49107015	ENSG00000124207.18	0	+
chrX	102604159	102619159	ENSG00000125962.17	0	+
chr9	136929221	136939221	ENSG00000127191.20	0	+
chr7	141791367	141801367	ENSG00000127366.5	0	+
chr15	40394288	40404288	ENSG00000128944.14	0	+
chr7	56080670	56090670	ENSG00000129103.20	0	+
chr4	176332245	176342245	ENSG00000129128.13	0	+
chr22	45845307	45855307	ENSG00000130638.18	0	+
chr17	67744531	67754531	ENSG00000130935.11	0	+
chr1	147295767	147305767	ENSG00000131778.21	0	+
chr11	6484683	6494683	ENSG00000132286.13	0	+
chr13	36829104	36844104	ENSG00000133111.4	0	+
chr13	33966558	33976558	ENSG00000133119.14	0	+
chr1	116990358	117000358	ENSG00000134247.11	0	+
chr1	193264613	193274613	ENSG00000134371.16	0	+
chr9	78330098	78340098	ENSG00000135069.15	0	+
chr11	34147670	34157670	ENSG00000135372.11	0	+
chr1	229660887	229670887	ENSG00000135763.11	0	+
chr2	218755416	218775416	ENSG00000135912.12	0	+
chr12	105169134	105194134	ENSG00000136051.16	0	+
chr17	49835026	49845026	ENSG00000136504.15	0	+
chr2	159771027	159781027	ENSG00000136536.16	0	+
chr10	17716824	17726824	ENSG00000136738.16	0	+
chr9	97673748	97683748	ENSG00000136937.14	0	+
chr9	37503701	37513701	ENSG00000137054.17	0	+
chr2	24822376	24832376	ENSG00000138092.12	0	+
chr10	68694586	68704586	ENSG00000138336.10	0	+
chr2	215349773	215369773	ENSG00000138363.16	0	+
chr3	122881139	122891139	ENSG00000138463.10	0	+
chr12	34029694	34039694	ENSG00000139133.7	0	+
chr13	77764242	77779242	ENSG00000139737.23	0	+
chr14	51257655	51277655	ENSG00000139921.14	0	+
chr15	77485955	77500955	ENSG00000140382.16	0	+
chr16	2603190	2623190	ENSG00000140992.21	0	+
chr1	23696835	23741835	ENSG00000142676.15	0	+
chr1	93139079	93154079	ENSG00000143033.19	0	+
chr1	165911618	165926618	ENSG00000143179.17	0	+
chr1	161363206	161373206	ENSG00000143252.18	0	+
chr1	219220700	219310700	ENSG00000143353.13	0	+
chr1	212107400	212117400	ENSG00000143476.19	0	+
chr1	246768137	246778137	ENSG00000143653.11	0	+
chr1	225790670	225800670	ENSG00000143742.15	0	+
chr2	173368997	173383997	ENSG00000144354.16	0	+
chr2	196763490	196773490	ENSG00000144395.18	0	+
chr3	37366879	37376879	ENSG00000144674.20	0	+
chr4	82461177	82471177	ENSG00000145293.18	0	+
chr5	134831121	134841121	ENSG00000145833.17	0	+
chr5	151812911	151827911	ENSG00000145907.17	0	+
chr2	241225993	241240993	ENSG00000146205.16	0	+
chr8	41545030	41555030	ENSG00000147536.12	0	+
chr8	73048123	73068123	ENSG00000147601.16	0	+
chr11	43857741	43867741	ENSG00000149084.14	0	+
chr10	112818744	112838744	ENSG00000151532.16	0	+
chr4	44700928	44710928	ENSG00000151806.15	0	+
chr2	172608669	172628669	ENSG00000152256.15	0	+
chr10	14904315	14914315	ENSG00000152455.17	0	+
chr10	123170467	123430467	ENSG00000154473.19	0	+
chr8	91087095	91132095	ENSG00000155100.12	0	+
chr21	15880064	15895064	ENSG00000155313.17	0	+
chr5	154817605	154852605	ENSG00000155506.20	0	+
chr21	29630751	29645751	ENSG00000156273.17	0	+
chrX	134428792	134438792	ENSG00000156531.19	0	+
chr3	12192032	12207032	ENSG00000157152.17	0	+
chr15	59125045	59140045	ENSG00000157456.9	0	+
chrX	110184260	110194260	ENSG00000157600.14	0	+
chr15	42720998	42730998	ENSG00000159433.12	0	+
chr16	67929676	67939676	ENSG00000159792.10	0	+
chr5	179777283	179787283	ENSG00000161021.14	0	+
chr2	60931612	60941612	ENSG00000162924.17	0	+
chr2	183163114	183233114	ENSG00000163002.14	0	+
chr2	108885477	108900477	ENSG00000163006.13	0	+
chr3	155944020	155954020	ENSG00000163655.17	0	+
chr5	5490220	5530220	ENSG00000164151.12	0	+
chr8	93819234	93829234	ENSG00000164953.17	0	+
chr8	31176138	31186138	ENSG00000165392.12	0	+
chrX	134520513	134530513	ENSG00000165704.16	0	+
chr12	12471233	12481233	ENSG00000165714.12	0	+
chr10	98245624	98255624	ENSG00000166024.15	0	+
chr11	94876748	94891748	ENSG00000166025.19	0	+
chr10	100559998	100569998	ENSG00000166135.15	0	+
chr11	74842413	74872413	ENSG00000166439.7	0	+
chr19	44178381	44198381	ENSG00000167380.18	0	+
chr19	43852017	43862017	ENSG00000167637.18	0	+
chr19	4445018	4455018	ENSG00000167670.17	0	+
chr11	61446839	61476839	ENSG00000167985.9	0	+
chr6	57059041	57084041	ENSG00000168116.16	0	+
chr1	229305894	229315894	ENSG00000168118.13	0	+
chr3	9479240	9489240	ENSG00000168137.21	0	+
chr4	26435131	26445131	ENSG00000168214.23	0	+
chr3	158695836	158725836	ENSG00000168827.16	0	+
chr3	161253532	161263532	ENSG00000169251.14	0	+
chr4	37863028	37873028	ENSG00000169299.15	0	+
chr15	78595269	78605269	ENSG00000169684.14	0	+
chr1	1311677	1321677	ENSG00000169972.14	0	+
chr3	44660791	44670791	ENSG00000169981.12	0	+
chr3	23891640	23901640	ENSG00000170142.13	0	+
chr10	60796236	60811236	ENSG00000170312.18	0	+
chr17	16382745	16392745	ENSG00000170315.15	0	+
chr17	15975746	15985746	ENSG00000170425.4	0	+
chr15	38487710	38507710	ENSG00000171262.11	0	+
chr17	792509	802509	ENSG00000171861.12	0	+
chr2	227561217	227571217	ENSG00000173744.19	0	+
chr11	66668380	66678380	ENSG00000173933.22	0	+
chr11	66606019	66616019	ENSG00000173992.10	0	+
chr1	241895148	241925148	ENSG00000174371.18	0	+
chr10	131959834	131974834	ENSG00000175470.21	0	+
chr15	84627796	84647796	ENSG00000176371.15	0	+
chr12	56479708	56489708	ENSG00000176422.14	0	+
chr19	57330770	57340770	ENSG00000178229.9	0	+
chr12	50120457	50130457	ENSG00000178449.10	0	+
chr17	8270491	8280491	ENSG00000178921.15	0	+
chr1	28539300	28549300	ENSG00000180198.18	0	+
chr7	30370457	30415457	ENSG00000180233.12	0	+
chr7	30162765	30182765	ENSG00000180354.17	0	+
chr12	132080460	132135460	ENSG00000183495.16	0	+
chr12	122626396	122636396	ENSG00000184445.12	0	+
chr15	78903078	78913078	ENSG00000185787.17	0	+
chr19	57447101	57457101	ENSG00000186230.7	0	+
chr19	57421934	57431934	ENSG00000186272.14	0	+
chrX	51408843	51428843	ENSG00000187690.4	0	+
chr1	40464142	40474142	ENSG00000187801.16	0	+
chr1	147993592	148013592	ENSG00000188092.16	0	+
chr19	9351162	9386162	ENSG00000188321.15	0	+
chr7	64833681	64843681	ENSG00000197008.10	0	+
chr7	149183042	149193042	ENSG00000197024.10	0	+
chr12	53481162	53491162	ENSG00000197111.17	0	+
chr19	57865117	57875117	ENSG00000198466.13	0	+
chr4	163520733	163545733	ENSG00000198498.11	0	+
chr2	237100474	237110474	ENSG00000198612.12	0	+
chr6	147737547	147792547	ENSG00000203727.4	0	+
chr1	52894998	52904998	ENSG00000203995.11	0	+
chr19	57717301	57737301	ENSG00000204519.11	0	+
chr8	80526265	80541265	ENSG00000205189.14	0	+
chr5	70078522	70088522	ENSG00000205571.16	0	+
chr1	168253021	168263021	ENSG00000213064.11	0	+
chr19	24129968	24144968	ENSG00000213096.11	0	+
chr1	109096935	109106935	ENSG00000215717.8	0	+
chr7	102809552	102844552	ENSG00000222011.10	0	+
chr17	81241310	81251310	ENSG00000224877.4	0	+
chr12	66134449	66144449	ENSG00000239335.4	0	+
chr3	10294903	10309903	ENSG00000240288.8	0	+
chr9	111670473	111755473	ENSG00000242616.5	0	+
chr3	112812819	112862819	ENSG00000242770.3	0	+
chr15	74516959	74526959	ENSG00000247240.11	0	+
chr2	197708395	197728395	ENSG00000247626.5	0	+
chr8	12202753	12232753	ENSG00000255052.6	0	+
chr3	101685669	101700669	ENSG00000256628.6	0	+
chr19	34229302	34239302	ENSG00000257103.10	0	+
chr1	149839767	149849767	ENSG00000270882.3	0	+
chr15	30649529	30709529	ENSG00000285077.4	0	+
chr10	46815125	46825125	ENSG00000291069.2	0	+
chr9	92838458	92848458	ENSG00000291168.2	0	+
chr10	79923119	79933119	ENSG00000293431.1	0	+
chr4	415434	425434	ENSG00000293360.1	0	-
chr16	30275017	30285017	ENSG00000291266.2	0	-
chr16	70204481	70219481	ENSG00000291263.2	0	-
chr17	64896424	64966424	ENSG00000291140.2	0	-
chr9	40890522	40900522	ENSG00000290923.2	0	-
chr9	96875845	96885845	ENSG00000290770.2	0	-
chr7	102527918	102537918	ENSG00000284981.2	0	-
chr2	55537291	55547291	ENSG00000275052.6	0	-
chr1	149844044	149854044	ENSG00000270276.3	0	-
chr7	102622024	102665367	ENSG00000228049.8	0	-
chr1	145728867	145738867	ENSG00000265491.6	0	-
chr8	144252044	144262044	ENSG00000261236.9	0	-
chr14	30402074	30412074	ENSG00000257636.7	0	-
chr14	24199614	24209614	ENSG00000254505.12	0	-
chr8	90948083	90958083	ENSG00000253250.4	0	-
chr19	12515372	12525372	ENSG00000249709.8	0	-
chr17	18660750	18680750	ENSG00000240445.6	0	-
chr17	15426014	15436014	ENSG00000239704.13	0	-
chrX	10837542	10847542	ENSG00000234129.11	0	-
chrX	73930434	73940434	ENSG00000230590.13	0	-
chrX	73800648	73820648	ENSG00000229807.15	0	-
chr2	27060469	27070469	ENSG00000228474.7	0	-
chr19	54426708	54436708	ENSG00000226696.9	0	-
chr10	49434167	49454167	ENSG00000225830.17	0	-
chr16	70226777	70246777	ENSG00000223496.3	0	-
chr6	5092594	5102594	ENSG00000214113.12	0	-
chr3	48663840	48673840	ENSG00000213672.9	0	-
chr15	72325923	72340923	ENSG00000213614.12	0	-
chr16	28369396	28379396	ENSG00000205609.14	0	-
chr22	42048333	42058333	ENSG00000198951.13	0	-
chr5	37071227	37106227	ENSG00000197603.17	0	-
chr1	246935546	246945546	ENSG00000197472.15	0	-
chr8	94356959	94371959	ENSG00000197275.15	0	-
chr8	30563317	30578317	ENSG00000197265.10	0	-
chr9	96755489	96815489	ENSG00000196597.14	0	-
chr7	152634775	152644775	ENSG00000196584.4	0	-
chr1	117838484	117863484	ENSG00000196505.12	0	-
chr19	23211598	23221598	ENSG00000196081.10	0	-
chr19	37725832	37735832	ENSG00000189144.16	0	-
chr6	143412831	143422831	ENSG00000189007.17	0	-
chr4	42100852	42110852	ENSG00000188848.17	0	-
chr6	8003565	8013565	ENSG00000188428.21	0	-
chrX	57073550	57118550	ENSG00000186787.11	0	-
chr17	1769484	1779484	ENSG00000186532.13	0	-
chr1	222658012	222668012	ENSG00000186063.14	0	-
chr10	74110254	74120254	ENSG00000185009.14	0	-
chr2	19886630	19896630	ENSG00000183891.7	0	-
chr8	93713154	93728154	ENSG00000183808.13	0	-
chr17	81877834	81887834	ENSG00000183684.9	0	-
chr21	39164768	39174768	ENSG00000183527.13	0	-
chr14	59414021	59429021	ENSG00000181619.12	0	-
chrX	14580387	14690387	ENSG00000181544.17	0	-
chr17	202388	212388	ENSG00000181031.17	0	-
chr6	44092289	44112289	ENSG00000180992.8	0	-
chr22	27841668	27851668	ENSG00000180957.19	0	-
chr10	70192830	70202830	ENSG00000180817.13	0	-
chr16	30408614	30423614	ENSG00000179958.10	0	-
chr17	734420	744420	ENSG00000179409.11	0	-
chr19	57788840	57803840	ENSG00000178935.5	0	-
chr15	74909790	74919790	ENSG00000178741.13	0	-
chr17	15477263	15502263	ENSG00000175106.17	0	-
chr2	95806918	95836918	ENSG00000174501.15	0	-
chr12	94266448	94306448	ENSG00000173588.17	0	-
chr10	94318225	94333225	ENSG00000173145.12	0	-
chr4	83246535	83261535	ENSG00000173085.15	0	-
chr7	64499877	64519877	ENSG00000173041.13	0	-
chr3	129376320	129401320	ENSG00000172771.13	0	-
chr8	33360823	33370823	ENSG00000172728.17	0	-
chr10	45603374	45613374	ENSG00000172671.21	0	-
chr3	178950120	178960120	ENSG00000172667.12	0	-
chr2	42422016	42442016	ENSG00000171126.8	0	-
chr2	28834792	28849792	ENSG00000171103.12	0	-
chr15	33848781	33858781	ENSG00000169857.10	0	-
chr2	110626332	110636332	ENSG00000169679.16	0	-
chr15	75583082	75598082	ENSG00000169371.15	0	-
chr7	40106026	40126026	ENSG00000168303.9	0	-
chr11	6881573	6891573	ENSG00000166368.3	0	-
chr10	117267273	117277273	ENSG00000165650.13	0	-
chr11	126187094	126202094	ENSG00000165526.10	0	-
chr8	124296188	124306188	ENSG00000164983.10	0	-
chr8	103373634	103398634	ENSG00000164933.13	0	-
chr7	21884973	21899973	ENSG00000164649.21	0	-
chr7	107181371	107201371	ENSG00000164597.16	0	-
chr7	35192429	35202429	ENSG00000164532.11	0	-
chr5	127035234	127045234	ENSG00000164241.14	0	-
chr3	47485639	47495639	ENSG00000163832.17	0	-
chr3	108534863	108549863	ENSG00000163507.16	0	-
chr1	151144747	151159747	ENSG00000163155.12	0	-
chr2	17653582	17663582	ENSG00000163029.17	0	-
chr2	151778983	151788983	ENSG00000162980.18	0	-
chr2	31845059	31865059	ENSG00000162959.15	0	-
chr1	77934054	77944054	ENSG00000162613.19	0	-
chr16	31406	46406	ENSG00000161980.7	0	-
chr17	44024327	44034327	ENSG00000161654.11	0	-
chr8	144496287	144511287	ENSG00000160957.16	0	-
chr19	40309535	40319535	ENSG00000160392.15	0	-
chr21	42828012	42843012	ENSG00000160193.13	0	-
chr5	131388920	131423920	ENSG00000158987.23	0	-
chr3	138006986	138061986	ENSG00000158163.16	0	-
chr3	9827801	9837801	ENSG00000156990.15	0	-
chr15	73550002	73560002	ENSG00000156642.18	0	-
chr1	111100883	111115883	ENSG00000156171.16	0	-
chr9	74970789	74980789	ENSG00000156017.14	0	-
chr1	112901846	112911846	ENSG00000155380.14	0	-
chr21	25550631	25585631	ENSG00000154719.15	0	-
chr1	244825637	244840637	ENSG00000153187.22	0	-
chr11	107286600	107321600	ENSG00000152404.17	0	-
chr5	10195506	10225506	ENSG00000150756.15	0	-
chr11	108140279	108155279	ENSG00000149308.19	0	-
chr9	133396058	133406058	ENSG00000148300.13	0	-
chr8	22610417	22620417	ENSG00000147439.15	0	-
chrX	136838003	136848003	ENSG00000147274.15	0	-
chr7	158603223	158628223	ENSG00000146918.21	0	-
chr7	12305200	12330200	ENSG00000146530.16	0	-
chr6	145844244	145864244	ENSG00000146414.18	0	-
chr6	87493458	87513458	ENSG00000146282.20	0	-
chr4	163100072	163110072	ENSG00000145414.10	0	-
chr4	87149980	87159980	ENSG00000145332.15	0	-
chr2	73741781	73761781	ENSG00000144048.13	0	-
chr2	38551968	38561968	ENSG00000143889.16	0	-
chr1	156710795	156720795	ENSG00000143319.19	0	-
chr1	175924827	175944827	ENSG00000143207.22	0	-
chr1	67387809	67407809	ENSG00000142864.16	0	-
chr19	36309452	36334452	ENSG00000142065.15	0	-
chr17	16019064	16029064	ENSG00000141027.24	0	-
chr12	31265583	31280583	ENSG00000139146.15	0	-
chr4	82341522	82351522	ENSG00000138668.21	0	-
chr10	73365100	73375100	ENSG00000138279.17	0	-
chr2	44306280	44316280	ENSG00000138078.17	0	-
chr11	111716907	111726907	ENSG00000137713.17	0	-
chr11	78425619	78435619	ENSG00000137513.12	0	-
chr9	97659908	97674908	ENSG00000136936.12	0	-
chr9	100287071	100302071	ENSG00000136891.15	0	-
chr17	57970918	58000918	ENSG00000136450.13	0	-
chr15	79823584	79833584	ENSG00000136371.12	0	-
chr7	47951881	47961881	ENSG00000136273.15	0	-
chr1	180957711	180972711	ENSG00000135823.14	0	-
chr6	138888492	138903492	ENSG00000135597.20	0	-
chr6	109351513	109366513	ENSG00000135535.18	0	-
chr6	85587778	85607778	ENSG00000135316.20	0	-
chr9	83637385	83657385	ENSG00000135018.15	0	-
chr5	115603209	115613209	ENSG00000134970.15	0	-
chr15	34125364	34140364	ENSG00000134152.12	0	-
chr14	70556256	70581256	ENSG00000133997.13	0	-
chr12	92105277	92140277	ENSG00000133639.6	0	-
chr17	73197352	73207352	ENSG00000133193.14	0	-
chr13	45323470	45333470	ENSG00000133112.18	0	-
chr20	44486220	44496220	ENSG00000132824.15	0	-
chr1	71053250	71063250	ENSG00000132485.15	0	-
chr7	50434127	50444127	ENSG00000132436.14	0	-
chr11	6555071	6595071	ENSG00000132275.12	0	-
chr3	15550581	15560581	ENSG00000131373.16	0	-
chrX	75041047	75051047	ENSG00000131269.20	0	-
chr16	85661197	85676197	ENSG00000131153.10	0	-
chr6	149494494	149504494	ENSG00000131013.5	0	-
chr2	239862449	239892449	ENSG00000130414.14	0	-
chr6	158960083	158970083	ENSG00000130363.15	0	-
chr14	31436035	31446035	ENSG00000129480.14	0	-
chr1	25821912	25831912	ENSG00000127423.11	0	-
chr14	55133109	55148109	ENSG00000126787.14	0	-
chr14	60628420	60643420	ENSG00000126778.13	0	-
chr13	113167535	113177535	ENSG00000126226.23	0	-
chr1	23278770	23303770	ENSG00000125944.23	0	-
chrX	119818807	119833807	ENSG00000125351.15	0	-
chr16	58509950	58519950	ENSG00000125107.20	0	-
chr5	65482765	65517765	ENSG00000123219.14	0	-
chr13	51915435	51930435	ENSG00000123191.19	0	-
chr12	113806737	113816737	ENSG00000122965.12	0	-
chr10	73080154	73130154	ENSG00000122882.12	0	-
chr7	33004112	33014112	ENSG00000122643.25	0	-
chr1	90890297	90915297	ENSG00000122482.23	0	-
chr1	110936651	110946651	ENSG00000121931.17	0	-
chr13	19664751	19674751	ENSG00000121390.20	0	-
chr12	101383115	101393115	ENSG00000120805.15	0	-
chr8	109220918	109240918	ENSG00000120526.13	0	-
chr9	112200070	112215070	ENSG00000119314.18	0	-
chr1	236539004	236549004	ENSG00000119285.12	0	-
chr4	15594380	15604380	ENSG00000118564.16	0	-
chr6	145783501	145793501	ENSG00000118496.6	0	-
chr15	80936288	80946288	ENSG00000117899.12	0	-
chr1	192987245	193012245	ENSG00000116750.15	0	-
chr1	66989349	66999349	ENSG00000116704.9	0	-
chr1	111429889	111439889	ENSG00000116455.14	0	-
chr1	29182656	29192656	ENSG00000116353.17	0	-
chr2	175062249	175072249	ENSG00000115966.19	0	-
chr2	99308981	99318981	ENSG00000115514.13	0	-
chr2	96583169	96593169	ENSG00000114982.20	0	-
chr3	156524552	156539552	ENSG00000114850.8	0	-
chr3	131452201	131462201	ENSG00000114686.10	0	-
chr3	167668297	167683297	ENSG00000114209.16	0	-
chr15	25323727	25333727	ENSG00000114062.23	0	-
chr5	32094711	32124711	ENSG00000113384.15	0	-
chr6	110079816	110099816	ENSG00000112290.14	0	-
chr6	98853534	98868534	ENSG00000112234.10	0	-
chr6	122433347	122443347	ENSG00000111897.8	0	-
chr6	118803441	118813441	ENSG00000111877.19	0	-
chr12	112016688	112026688	ENSG00000111300.11	0	-
chr12	10584189	10604189	ENSG00000111196.12	0	-
chr11	90185428	90200428	ENSG00000110172.13	0	-
chr11	47606696	47616696	ENSG00000109919.11	0	-
chr4	24507440	24517440	ENSG00000109606.14	0	-
chr17	50357856	50367856	ENSG00000108826.17	0	-
chr17	19894301	19904301	ENSG00000108599.16	0	-
chr10	30299800	30309800	ENSG00000107951.16	0	-
chr9	112030776	112040776	ENSG00000106868.18	0	-
chr7	128287684	128297684	ENSG00000106344.9	0	-
chr19	39815349	39825349	ENSG00000105204.14	0	-
chr8	65592455	65602455	ENSG00000104442.11	0	-
chr15	41299267	41309267	ENSG00000104147.10	0	-
chr15	48702927	48712927	ENSG00000103995.14	0	-
chr16	19691936	19701936	ENSG00000103550.15	0	-
chr20	34255267	34280267	ENSG00000101444.13	0	-
chr14	80461968	80476968	ENSG00000100629.18	0	-
chr22	39302869	39312869	ENSG00000100316.17	0	-
chr22	29495878	29505878	ENSG00000100296.15	0	-
chr19	2415624	2425624	ENSG00000099800.9	0	-
chr14	21197374	21207374	ENSG00000092199.20	0	-
chr16	74437426	74447426	ENSG00000090863.13	0	-
chr20	1358976	1368976	ENSG00000088832.19	0	-
chr6	104718093	104728093	ENSG00000085382.13	0	-
chr9	2690468	2720468	ENSG00000080608.11	0	-
chr18	46793217	46803217	ENSG00000078043.17	0	-
chr1	20796291	20806291	ENSG00000075151.24	0	-
chr15	66321190	66336190	ENSG00000075131.11	0	-
chr19	49325584	49340584	ENSG00000074219.15	0	-
chr3	185633129	185643129	ENSG00000073792.17	0	-
chr12	270056	280056	ENSG00000073614.13	0	-
chr19	43533305	43543305	ENSG00000073050.13	0	-
chr1	205697821	205712821	ENSG00000069275.14	0	-
chr1	212348925	212363925	ENSG00000065600.14	0	-
chr16	75586867	75596867	ENSG00000065457.12	0	-
chr12	26894249	26904249	ENSG00000064102.16	0	-
chr12	96253241	96278241	ENSG00000059758.9	0	-
chr7	152114921	152134921	ENSG00000055609.21	0	-
chr1	19291990	19301990	ENSG00000053371.14	0	-
chr5	175901676	175916676	ENSG00000051596.11	0	-
chr3	121411425	121431425	ENSG00000051341.16	0	-
chr11	6201334	6211334	ENSG00000051009.12	0	-
chr1	244398493	244408493	ENSG00000035687.10	0	-
chr6	155241133	155256133	ENSG00000029639.12	0	-
chr6	166912112	166922112	ENSG00000026297.18	0	-
chr20	52031662	52051662	ENSG00000020256.21	0	-
chr17	43034291	43044291	ENSG00000012048.27	0	-
chr12	47646248	47661248	ENSG00000005175.11	0	-
chr1	32992985	33007985	ENSG00000004455.19	0	-
chr7	92182497	92197497	ENSG00000001631.18	0	-

## Sheet: Ctrl_hiAPGC_2.dogs
chromosome	start	end	gene_id	unused_field	strand
chr1	169855456	169865456	ENSG00000000460.18	0	+
chr7	141655244	141665244	ENSG00000006530.19	0	+
chr1	231355023	231365023	ENSG00000010072.17	0	+
chr17	32381885	32406885	ENSG00000010244.20	0	+
chr6	122433119	122443119	ENSG00000025156.14	0	+
chr22	50524780	50534780	ENSG00000025770.20	0	+
chr12	95302799	95312799	ENSG00000028203.20	0	+
chr5	55426065	55436065	ENSG00000039123.17	0	+
chr15	40732344	40742344	ENSG00000051180.18	0	+
chr6	1613897	1633897	ENSG00000054598.9	0	+
chr2	202303666	202313666	ENSG00000055044.12	0	+
chr6	149591748	149601748	ENSG00000055211.15	0	+
chr2	186511929	186521929	ENSG00000065548.20	0	+
chr1	42703805	42718805	ENSG00000065978.20	0	+
chr6	126203817	126398875	ENSG00000066651.21	0	+
chr11	612225	622225	ENSG00000070047.14	0	+
chr4	5814305	5829305	ENSG00000072840.14	0	+
chr5	257083	267083	ENSG00000073578.19	0	+
chr2	71437183	71447183	ENSG00000075292.21	0	+
chr2	171750158	171775158	ENSG00000077380.17	0	+
chr4	40158252	40168252	ENSG00000078177.16	0	+
chr2	216206303	216221303	ENSG00000079246.17	0	+
chr8	11839500	11849500	ENSG00000079459.15	0	+
chr1	113685923	113695923	ENSG00000081026.20	0	+
chr17	48061545	48071545	ENSG00000082641.17	0	+
chr13	73017823	73027823	ENSG00000083535.17	0	+
chr1	40423326	40433326	ENSG00000084070.13	0	+
chr5	78480739	78490739	ENSG00000085365.19	0	+
chr6	161117385	161132385	ENSG00000085511.21	0	+
chr1	46278482	46288482	ENSG00000085999.14	0	+
chr19	54155708	54165708	ENSG00000088038.21	0	+
chr2	117832379	117842379	ENSG00000088205.14	0	+
chr20	31801805	31811805	ENSG00000088325.17	0	+
chr15	43868414	43898414	ENSG00000092470.13	0	+
chr17	76781449	76791449	ENSG00000092931.13	0	+
chr3	38421348	38436348	ENSG00000093217.12	0	+
chr10	92031437	92041437	ENSG00000095564.16	0	+
chr22	35425431	35455431	ENSG00000100297.17	0	+
chr14	96954846	97009846	ENSG00000100749.10	0	+
chr20	5197887	5207887	ENSG00000101290.15	0	+
chrX	102938300	102953300	ENSG00000102128.8	0	+
chrX	76178755	76193755	ENSG00000102390.13	0	+
chr16	682870	692870	ENSG00000103266.12	0	+
chr15	65891989	65906989	ENSG00000103769.11	0	+
chr15	44563029	44573029	ENSG00000104131.14	0	+
chr8	85481493	85491493	ENSG00000104267.11	0	+
chr8	30183639	30198639	ENSG00000104671.9	0	+
chr8	15766649	15786649	ENSG00000104723.22	0	+
chr19	46021318	46031318	ENSG00000104983.9	0	+
chr19	30016612	30051612	ENSG00000105176.19	0	+
chr7	24694193	24719193	ENSG00000105926.17	0	+
chr9	5776557	5791557	ENSG00000107036.13	0	+
chr9	35758600	35768600	ENSG00000107185.11	0	+
chr10	111017307	111027307	ENSG00000108061.14	0	+
chr10	58399220	58409220	ENSG00000108064.12	0	+
chr4	108632886	108647886	ENSG00000109475.19	0	+
chr4	177362936	177372936	ENSG00000109674.5	0	+
chr4	17844865	17854865	ENSG00000109805.11	0	+
chr12	122062044	122122044	ENSG00000110987.10	0	+
chr12	101744140	101759140	ENSG00000111666.12	0	+
chr6	36605911	36615911	ENSG00000112081.19	0	+
chr6	133532128	133542128	ENSG00000112319.22	0	+
chr6	170572870	170582870	ENSG00000112592.16	0	+
chr5	66082546	66092546	ENSG00000112851.17	0	+
chr5	667168	677168	ENSG00000112877.9	0	+
chr5	44820428	44840428	ENSG00000112996.12	0	+
chr5	80877147	80887147	ENSG00000113318.12	0	+
chr5	33469531	33479531	ENSG00000113407.15	0	+
chr2	74970128	75115128	ENSG00000115350.13	0	+
chr1	145670980	145680980	ENSG00000117262.20	0	+
chr1	93369493	93384493	ENSG00000117505.14	0	+
chr6	108684774	108699774	ENSG00000118689.16	0	+
chr13	75607472	75702472	ENSG00000118939.20	0	+
chr9	107332192	107342192	ENSG00000119318.14	0	+
chr2	32316594	32331594	ENSG00000119820.12	0	+
chr9	4885917	4895917	ENSG00000120158.12	0	+
chrX	129592561	129602561	ENSG00000122126.19	0	+
chr10	58289586	58299586	ENSG00000122873.13	0	+
chr1	50974634	51014634	ENSG00000123080.13	0	+
chr6	110895714	110905714	ENSG00000123505.21	0	+
chr5	151492379	151507379	ENSG00000123643.15	0	+
chr20	49097015	49107015	ENSG00000124207.18	0	+
chr6	43450430	43460430	ENSG00000124574.17	0	+
chr9	136929221	136939221	ENSG00000127191.20	0	+
chr7	141791367	141801367	ENSG00000127366.5	0	+
chr15	40394288	40404288	ENSG00000128944.14	0	+
chr7	56080670	56090670	ENSG00000129103.20	0	+
chr4	176332245	176342245	ENSG00000129128.13	0	+
chr19	5691881	5701881	ENSG00000130255.14	0	+
chr22	45845307	45865307	ENSG00000130638.18	0	+
chr17	67744531	67754531	ENSG00000130935.11	0	+
chr1	147295767	147305767	ENSG00000131778.21	0	+
chr11	6484683	6494683	ENSG00000132286.13	0	+
chr13	36829104	36844104	ENSG00000133111.4	0	+
chr1	116990358	117000358	ENSG00000134247.11	0	+
chr9	78330098	78340098	ENSG00000135069.15	0	+
chr11	34147670	34157670	ENSG00000135372.11	0	+
chr1	229660887	229675887	ENSG00000135763.11	0	+
chr2	218755416	218775416	ENSG00000135912.12	0	+
chr12	105169134	105194134	ENSG00000136051.16	0	+
chr17	49835026	49845026	ENSG00000136504.15	0	+
chr2	159771027	159781027	ENSG00000136536.16	0	+
chr10	17716824	17726824	ENSG00000136738.16	0	+
chr9	97673748	97683748	ENSG00000136937.14	0	+
chr9	37503701	37513701	ENSG00000137054.17	0	+
chr2	24822376	24832376	ENSG00000138092.12	0	+
chr10	68694586	68704586	ENSG00000138336.10	0	+
chr2	215349773	215369773	ENSG00000138363.16	0	+
chr3	122881139	122891139	ENSG00000138463.10	0	+
chr12	34029694	34039694	ENSG00000139133.7	0	+
chr13	77764242	77779242	ENSG00000139737.23	0	+
chr14	51257655	51277655	ENSG00000139921.14	0	+
chr15	77485955	77495955	ENSG00000140382.16	0	+
chr15	89631056	89641056	ENSG00000140534.15	0	+
chr16	2603190	2613190	ENSG00000140992.21	0	+
chr1	23696835	23741835	ENSG00000142676.15	0	+
chr1	93139079	93154079	ENSG00000143033.19	0	+
chr1	165911618	165931618	ENSG00000143179.17	0	+
chr1	161363206	161378206	ENSG00000143252.18	0	+
chr1	219220700	219310700	ENSG00000143353.13	0	+
chr1	212107400	212122400	ENSG00000143476.19	0	+
chr1	246768137	246778137	ENSG00000143653.11	0	+
chr1	225790670	225800670	ENSG00000143742.15	0	+
chr2	174430077	174440077	ENSG00000144306.16	0	+
chr2	173368997	173383997	ENSG00000144354.16	0	+
chr2	231809254	231819254	ENSG00000144524.19	0	+
chr3	37366879	37376879	ENSG00000144674.20	0	+
chr4	82461177	82471177	ENSG00000145293.18	0	+
chr5	134831121	134841121	ENSG00000145833.17	0	+
chr5	151812911	151827911	ENSG00000145907.17	0	+
chr2	241225993	241245993	ENSG00000146205.16	0	+
chr8	41545030	41555030	ENSG00000147536.12	0	+
chr8	73048123	73068123	ENSG00000147601.16	0	+
chr10	133422520	133432520	ENSG00000148824.20	0	+
chr11	43857741	43867741	ENSG00000149084.14	0	+
chr10	112818744	112863744	ENSG00000151532.16	0	+
chr2	172608669	172618669	ENSG00000152256.15	0	+
chr11	14874614	14884614	ENSG00000152270.11	0	+
chr10	14904315	14914315	ENSG00000152455.17	0	+
chr10	123170467	123415467	ENSG00000154473.19	0	+
chr3	16350299	16360299	ENSG00000154814.15	0	+
chr8	91087095	91097095	ENSG00000155100.12	0	+
chr21	15880064	15895064	ENSG00000155313.17	0	+
chr5	154817605	154852605	ENSG00000155506.20	0	+
chr8	17302707	17312707	ENSG00000155975.11	0	+
chr21	29630751	29645751	ENSG00000156273.17	0	+
chrX	134428792	134438792	ENSG00000156531.19	0	+
chr3	12192032	12207032	ENSG00000157152.17	0	+
chr15	59125045	59140045	ENSG00000157456.9	0	+
chr15	42720998	42730998	ENSG00000159433.12	0	+
chr16	67929676	67939676	ENSG00000159792.10	0	+
chr21	42913304	42923304	ENSG00000160194.19	0	+
chr5	179777283	179787283	ENSG00000161021.14	0	+
chr2	60931612	60941612	ENSG00000162924.17	0	+
chr2	183163114	183233114	ENSG00000163002.14	0	+
chr2	108885477	108900477	ENSG00000163006.13	0	+
chr3	155944020	155954020	ENSG00000163655.17	0	+
chr1	42852477	42862477	ENSG00000164011.19	0	+
chr5	5490220	5525220	ENSG00000164151.12	0	+
chr8	103443579	103453579	ENSG00000164934.16	0	+
chrX	134520513	134530513	ENSG00000165704.16	0	+
chr11	94876748	94891748	ENSG00000166025.19	0	+
chr10	100559998	100569998	ENSG00000166135.15	0	+
chr11	74842413	74872413	ENSG00000166439.7	0	+
chr19	44178381	44198381	ENSG00000167380.18	0	+
chr19	43852017	43862017	ENSG00000167637.18	0	+
chr19	4445018	4455018	ENSG00000167670.17	0	+
chr11	61446839	61476839	ENSG00000167985.9	0	+
chr6	57059041	57084041	ENSG00000168116.16	0	+
chr1	229305894	229325894	ENSG00000168118.13	0	+
chr3	9479240	9489240	ENSG00000168137.21	0	+
chr4	26435131	26445131	ENSG00000168214.23	0	+
chr3	52295273	52310273	ENSG00000168237.19	0	+
chr3	158695836	158720836	ENSG00000168827.16	0	+
chr3	161253532	161263532	ENSG00000169251.14	0	+
chr4	37863028	37873028	ENSG00000169299.15	0	+
chr15	78595269	78605269	ENSG00000169684.14	0	+
chr1	1311677	1321677	ENSG00000169972.14	0	+
chr3	44660791	44670791	ENSG00000169981.12	0	+
chr3	23891640	23901640	ENSG00000170142.13	0	+
chr10	60796236	60811236	ENSG00000170312.18	0	+
chr17	15975746	15990746	ENSG00000170425.4	0	+
chr3	179394940	179404940	ENSG00000171109.20	0	+
chr15	38487710	38507710	ENSG00000171262.11	0	+
chr17	792509	802509	ENSG00000171861.12	0	+
chr2	227561217	227571217	ENSG00000173744.19	0	+
chr11	66668380	66678380	ENSG00000173933.22	0	+
chr1	241895148	241930148	ENSG00000174371.18	0	+
chr15	84627796	84647796	ENSG00000176371.15	0	+
chr12	56479708	56489708	ENSG00000176422.14	0	+
chr19	57330770	57340770	ENSG00000178229.9	0	+
chr12	50120457	50130457	ENSG00000178449.10	0	+
chr17	8270491	8280491	ENSG00000178921.15	0	+
chr1	28539300	28549300	ENSG00000180198.18	0	+
chr7	30370457	30415457	ENSG00000180233.12	0	+
chr7	30162765	30192765	ENSG00000180354.17	0	+
chr1	203871152	203881152	ENSG00000182004.14	0	+
chr12	132080460	132135460	ENSG00000183495.16	0	+
chr12	122626396	122636396	ENSG00000184445.12	0	+
chr15	78903078	78913078	ENSG00000185787.17	0	+
chr19	57447101	57457101	ENSG00000186230.7	0	+
chr19	57421934	57431934	ENSG00000186272.14	0	+
chrX	51408843	51428843	ENSG00000187690.4	0	+
chr1	40464142	40474142	ENSG00000187801.16	0	+
chr1	147993592	148008592	ENSG00000188092.16	0	+
chr19	9351162	9386162	ENSG00000188321.15	0	+
chr7	64833681	64843681	ENSG00000197008.10	0	+
chr7	149183042	149193042	ENSG00000197024.10	0	+
chr7	99632408	99652408	ENSG00000197037.12	0	+
chr12	53481162	53491162	ENSG00000197111.17	0	+
chr12	104350307	104360307	ENSG00000198431.18	0	+
chr19	57865117	57875117	ENSG00000198466.13	0	+
chr4	163520733	163540733	ENSG00000198498.11	0	+
chr2	237100474	237110474	ENSG00000198612.12	0	+
chr6	147737547	147792547	ENSG00000203727.4	0	+
chr1	52894998	52904998	ENSG00000203995.11	0	+
chr19	57717301	57737301	ENSG00000204519.11	0	+
chr8	80526265	80541265	ENSG00000205189.14	0	+
chr5	70078522	70088522	ENSG00000205571.16	0	+
chr1	168253021	168263021	ENSG00000213064.11	0	+
chr19	24129968	24144968	ENSG00000213096.11	0	+
chr1	109096935	109106935	ENSG00000215717.8	0	+
chr7	102809552	102844552	ENSG00000222011.10	0	+
chr17	81241310	81251310	ENSG00000224877.4	0	+
chr12	66134449	66144449	ENSG00000239335.4	0	+
chr3	10294903	10309903	ENSG00000240288.8	0	+
chr12	57617245	57627245	ENSG00000240771.9	0	+
chr9	111670473	111755473	ENSG00000242616.5	0	+
chr3	112812819	112832819	ENSG00000242770.3	0	+
chr2	197708395	197718395	ENSG00000247626.5	0	+
chr4	4821468	4831468	ENSG00000247708.9	0	+
chr12	54122235	54137235	ENSG00000249388.4	0	+
chr8	12202753	12232753	ENSG00000255052.6	0	+
chr3	101685669	101705669	ENSG00000256628.6	0	+
chr19	34229302	34239302	ENSG00000257103.10	0	+
chr14	64944591	64959591	ENSG00000258289.11	0	+
chr1	149839767	149849767	ENSG00000270882.3	0	+
chr15	30649529	30709529	ENSG00000285077.4	0	+
chr10	46815125	46830125	ENSG00000291069.2	0	+
chr9	92838458	92848458	ENSG00000291168.2	0	+
chr4	415434	425434	ENSG00000293360.1	0	-
chr16	30270017	30285017	ENSG00000291266.2	0	-
chr16	70204481	70219481	ENSG00000291263.2	0	-
chr17	64921424	64966424	ENSG00000291140.2	0	-
chr9	96750489	96885845	ENSG00000290770.2	0	-
chr7	102527918	102537918	ENSG00000284981.2	0	-
chr2	55537291	55547291	ENSG00000275052.6	0	-
chr1	149844044	149854044	ENSG00000270276.3	0	-
chr7	102622024	102637024	ENSG00000267368.2	0	-
chr14	30402074	30412074	ENSG00000257636.7	0	-
chr14	24199614	24209614	ENSG00000254505.12	0	-
chr8	90948083	90958083	ENSG00000253250.4	0	-
chr19	12515372	12525372	ENSG00000249709.8	0	-
chr17	18660750	18680750	ENSG00000240445.6	0	-
chr17	15426014	15436014	ENSG00000239704.13	0	-
chrX	73930434	73940434	ENSG00000230590.13	0	-
chrX	73800648	73820648	ENSG00000229807.15	0	-
chr5	80616225	80626225	ENSG00000228716.8	0	-
chr2	27060469	27070469	ENSG00000228474.7	0	-
chr7	102645367	102665367	ENSG00000228049.8	0	-
chr19	54426708	54436708	ENSG00000226696.9	0	-
chr10	49434167	49454167	ENSG00000225830.17	0	-
chr16	70226777	70246777	ENSG00000223496.3	0	-
chr6	5087594	5102594	ENSG00000214113.12	0	-
chr22	38280690	38290690	ENSG00000213923.14	0	-
chr3	48663840	48673840	ENSG00000213672.9	0	-
chr15	72320923	72340923	ENSG00000213614.12	0	-
chr22	42043333	42058333	ENSG00000198951.13	0	-
chrX	119776496	119786496	ENSG00000198918.9	0	-
chr20	3178733	3188733	ENSG00000198171.14	0	-
chr5	37066227	37106227	ENSG00000197603.17	0	-
chr8	94356959	94371959	ENSG00000197275.15	0	-
chr8	30558317	30578317	ENSG00000197265.10	0	-
chr7	152634775	152644775	ENSG00000196584.4	0	-
chr1	117838484	117863484	ENSG00000196505.12	0	-
chr19	23211598	23221598	ENSG00000196081.10	0	-
chr19	37725832	37735832	ENSG00000189144.16	0	-
chr6	143412831	143422831	ENSG00000189007.17	0	-
chr6	8003565	8013565	ENSG00000188428.21	0	-
chrX	57073550	57118550	ENSG00000186787.11	0	-
chr17	1769484	1779484	ENSG00000186532.13	0	-
chr17	81529884	81539884	ENSG00000185504.18	0	-
chr10	74110254	74120254	ENSG00000185009.14	0	-
chr2	19886630	19896630	ENSG00000183891.7	0	-
chr8	93718154	93728154	ENSG00000183808.13	0	-
chr17	81877834	81887834	ENSG00000183684.9	0	-
chr21	39164768	39174768	ENSG00000183527.13	0	-
chr14	59414021	59429021	ENSG00000181619.12	0	-
chrX	14595387	14690387	ENSG00000181544.17	0	-
chr17	202388	212388	ENSG00000181031.17	0	-
chr6	44092289	44112289	ENSG00000180992.8	0	-
chr22	27841668	27851668	ENSG00000180957.19	0	-
chr16	30408614	30423614	ENSG00000179958.10	0	-
chr17	734420	744420	ENSG00000179409.11	0	-
chr19	57788840	57803840	ENSG00000178935.5	0	-
chr15	74909790	74919790	ENSG00000178741.13	0	-
chr17	15462263	15502263	ENSG00000175106.17	0	-
chr3	154262545	154272545	ENSG00000174953.15	0	-
chr3	136138916	136148916	ENSG00000174579.5	0	-
chr2	95806918	95836918	ENSG00000174501.15	0	-
chr12	94276448	94306448	ENSG00000173588.17	0	-
chr10	94318225	94333225	ENSG00000173145.12	0	-
chr4	83246535	83261535	ENSG00000173085.15	0	-
chr7	64494877	64519877	ENSG00000173041.13	0	-
chr3	129376320	129401320	ENSG00000172771.13	0	-
chr8	33355823	33370823	ENSG00000172728.17	0	-
chr10	45603374	45613374	ENSG00000172671.21	0	-
chr3	178950120	178960120	ENSG00000172667.12	0	-
chr2	42422016	42442016	ENSG00000171126.8	0	-
chr2	28834792	28849792	ENSG00000171103.12	0	-
chr15	33848781	33858781	ENSG00000169857.10	0	-
chr2	110626332	110636332	ENSG00000169679.16	0	-
chr15	75583082	75598082	ENSG00000169371.15	0	-
chr7	40106026	40126026	ENSG00000168303.9	0	-
chr11	6871573	6891573	ENSG00000166368.3	0	-
chr10	117267273	117277273	ENSG00000165650.13	0	-
chr11	126192094	126202094	ENSG00000165526.10	0	-
chr8	103373634	103398634	ENSG00000164933.13	0	-
chr7	21884973	21899973	ENSG00000164649.21	0	-
chr7	107186371	107201371	ENSG00000164597.16	0	-
chr5	127035234	127045234	ENSG00000164241.14	0	-
chr3	47485639	47495639	ENSG00000163832.17	0	-
chr3	108539863	108549863	ENSG00000163507.16	0	-
chr1	151149747	151159747	ENSG00000163155.12	0	-
chr2	17653582	17663582	ENSG00000163029.17	0	-
chr2	151778983	151788983	ENSG00000162980.18	0	-
chr2	31840059	31865059	ENSG00000162959.15	0	-
chr1	77934054	77944054	ENSG00000162613.19	0	-
chr16	31406	46406	ENSG00000161980.7	0	-
chr17	44024327	44034327	ENSG00000161654.11	0	-
chr8	144501287	144511287	ENSG00000160957.16	0	-
chr19	40309535	40319535	ENSG00000160392.15	0	-
chr21	42828012	42843012	ENSG00000160193.13	0	-
chr5	131403920	131423920	ENSG00000158987.23	0	-
chr3	138006986	138061986	ENSG00000158163.16	0	-
chr4	13341353	13361353	ENSG00000157869.17	0	-
chr3	9827801	9837801	ENSG00000156990.15	0	-
chr15	73550002	73560002	ENSG00000156642.18	0	-
chr1	111105883	111115883	ENSG00000156171.16	0	-
chr9	74970789	74980789	ENSG00000156017.14	0	-
chr1	112901846	112911846	ENSG00000155380.14	0	-
chr21	25545631	25585631	ENSG00000154719.15	0	-
chr3	33378335	33388335	ENSG00000153560.13	0	-
chr1	244825637	244840637	ENSG00000153187.22	0	-
chr5	79362635	79372635	ENSG00000152413.16	0	-
chr11	107286600	107321600	ENSG00000152404.17	0	-
chr5	10200506	10225506	ENSG00000150756.15	0	-
chr11	108140279	108155279	ENSG00000149308.19	0	-
chr10	93657882	93667882	ENSG00000148690.13	0	-
chr9	133396058	133406058	ENSG00000148300.13	0	-
chr8	22610417	22620417	ENSG00000147439.15	0	-
chrX	136838003	136848003	ENSG00000147274.15	0	-
chr7	158603223	158628223	ENSG00000146918.21	0	-
chr7	12310200	12330200	ENSG00000146530.16	0	-
chr6	145844244	145864244	ENSG00000146414.18	0	-
chr6	87498458	87513458	ENSG00000146282.20	0	-
chr4	163100072	163110072	ENSG00000145414.10	0	-
chr4	67433761	67468761	ENSG00000145241.12	0	-
chr2	73741781	73761781	ENSG00000144048.13	0	-
chr2	38551968	38561968	ENSG00000143889.16	0	-
chr1	150590850	150600850	ENSG00000143420.20	0	-
chr1	179089329	179099329	ENSG00000143322.22	0	-
chr1	156710795	156720795	ENSG00000143319.19	0	-
chr1	175929827	175944827	ENSG00000143207.22	0	-
chr1	67392809	67407809	ENSG00000142864.16	0	-
chr19	36309452	36334452	ENSG00000142065.15	0	-
chr17	16019064	16029064	ENSG00000141027.24	0	-
chr12	31265583	31280583	ENSG00000139146.15	0	-
chr4	82341522	82351522	ENSG00000138668.21	0	-
chr2	44306280	44316280	ENSG00000138078.17	0	-
chr11	111716907	111726907	ENSG00000137713.17	0	-
chr11	78425619	78435619	ENSG00000137513.12	0	-
chr11	85647741	85657741	ENSG00000137504.16	0	-
chr9	97654908	97674908	ENSG00000136936.12	0	-
chr9	100282071	100302071	ENSG00000136891.15	0	-
chr17	57970918	58000918	ENSG00000136450.13	0	-
chr15	79823584	79833584	ENSG00000136371.12	0	-
chr7	47951881	47961881	ENSG00000136273.15	0	-
chr1	180957711	180972711	ENSG00000135823.14	0	-
chr6	138888492	138903492	ENSG00000135597.20	0	-
chr6	109351513	109366513	ENSG00000135535.18	0	-
chr6	85507778	85607778	ENSG00000135316.20	0	-
chr9	85536538	85546538	ENSG00000135049.17	0	-
chr9	83627385	83657385	ENSG00000135018.15	0	-
chr15	34125364	34140364	ENSG00000134152.12	0	-
chr14	70561256	70581256	ENSG00000133997.13	0	-
chr12	92100277	92140277	ENSG00000133639.6	0	-
chr13	45323470	45333470	ENSG00000133112.18	0	-
chr20	44486220	44496220	ENSG00000132824.15	0	-
chr1	71053250	71063250	ENSG00000132485.15	0	-
chr7	50429127	50444127	ENSG00000132436.14	0	-
chr11	6555071	6595071	ENSG00000132275.12	0	-
chr3	15535581	15560581	ENSG00000131373.16	0	-
chr16	85661197	85676197	ENSG00000131153.10	0	-
chr6	149494494	149504494	ENSG00000131013.5	0	-
chr7	156984050	156994050	ENSG00000130675.15	0	-
chr6	158955083	158970083	ENSG00000130363.15	0	-
chr14	31436035	31446035	ENSG00000129480.14	0	-
chr1	25821912	25831912	ENSG00000127423.11	0	-
chr14	55138109	55148109	ENSG00000126787.14	0	-
chr13	113167535	113177535	ENSG00000126226.23	0	-
chr1	35589540	35599540	ENSG00000126067.13	0	-
chr1	23278770	23303770	ENSG00000125944.23	0	-
chr16	58509950	58519950	ENSG00000125107.20	0	-
chr5	65482765	65517765	ENSG00000123219.14	0	-
chr13	51915435	51930435	ENSG00000123191.19	0	-
chr12	113806737	113816737	ENSG00000122965.12	0	-
chr10	72995810	73005810	ENSG00000122884.14	0	-
chr10	73080154	73130154	ENSG00000122882.12	0	-
chr7	33004112	33014112	ENSG00000122643.25	0	-
chr1	90885297	90915297	ENSG00000122482.23	0	-
chr1	110926651	110946651	ENSG00000121931.17	0	-
chr13	19664751	19674751	ENSG00000121390.20	0	-
chr17	49588883	49598883	ENSG00000121067.20	0	-
chr12	101383115	101393115	ENSG00000120805.15	0	-
chr8	109205918	109240918	ENSG00000120526.13	0	-
chr9	112200070	112215070	ENSG00000119314.18	0	-
chr1	236539004	236549004	ENSG00000119285.12	0	-
chr6	145783501	145793501	ENSG00000118496.6	0	-
chr15	80936288	80946288	ENSG00000117899.12	0	-
chr1	119010283	119030283	ENSG00000116874.13	0	-
chr1	66989349	66999349	ENSG00000116704.9	0	-
chr1	111429889	111439889	ENSG00000116455.14	0	-
chr2	175062249	175072249	ENSG00000115966.19	0	-
chr2	99308981	99318981	ENSG00000115514.13	0	-
chr2	96583169	96593169	ENSG00000114982.20	0	-
chr3	156524552	156539552	ENSG00000114850.8	0	-
chr3	131452201	131462201	ENSG00000114686.10	0	-
chr3	167668297	167683297	ENSG00000114209.16	0	-
chr15	25323727	25333727	ENSG00000114062.23	0	-
chr5	32094711	32124711	ENSG00000113384.15	0	-
chr6	110084816	110099816	ENSG00000112290.14	0	-
chr6	98858534	98868534	ENSG00000112234.10	0	-
chr6	122433347	122443347	ENSG00000111897.8	0	-
chr6	118803441	118813441	ENSG00000111877.19	0	-
chr12	10584189	10604189	ENSG00000111196.12	0	-
chr11	90185428	90200428	ENSG00000110172.13	0	-
chr11	47606696	47616696	ENSG00000109919.11	0	-
chr4	24507440	24517440	ENSG00000109606.14	0	-
chr17	19894301	19904301	ENSG00000108599.16	0	-
chr10	30299800	30309800	ENSG00000107951.16	0	-
chr10	117994915	118004915	ENSG00000107560.13	0	-
chr7	128287684	128297684	ENSG00000106344.9	0	-
chr19	39815349	39825349	ENSG00000105204.14	0	-
chr8	65592455	65602455	ENSG00000104442.11	0	-
chr15	41299267	41309267	ENSG00000104147.10	0	-
chr15	48702927	48712927	ENSG00000103995.14	0	-
chr16	19691936	19701936	ENSG00000103550.15	0	-
chr20	34255267	34280267	ENSG00000101444.13	0	-
chr22	29495878	29505878	ENSG00000100296.15	0	-
chr14	21197374	21207374	ENSG00000092199.20	0	-
chr20	2471816	2481816	ENSG00000088876.14	0	-
chr20	1358976	1368976	ENSG00000088832.19	0	-
chr9	2685468	2720468	ENSG00000080608.11	0	-
chr1	20796291	20806291	ENSG00000075151.24	0	-
chr15	66321190	66336190	ENSG00000075131.11	0	-
chr19	49325584	49340584	ENSG00000074219.15	0	-
chr3	185633129	185643129	ENSG00000073792.17	0	-
chr12	270056	280056	ENSG00000073614.13	0	-
chr1	205697821	205712821	ENSG00000069275.14	0	-
chr1	212353925	212363925	ENSG00000065600.14	0	-
chr16	75586867	75596867	ENSG00000065457.12	0	-
chr12	26894249	26904249	ENSG00000064102.16	0	-
chr19	44316554	44326554	ENSG00000062370.18	0	-
chr12	96258241	96278241	ENSG00000059758.9	0	-
chr1	19291990	19301990	ENSG00000053371.14	0	-
chr5	175886676	175916676	ENSG00000051596.11	0	-
chr3	121411425	121431425	ENSG00000051341.16	0	-
chr11	6201334	6211334	ENSG00000051009.12	0	-
chr1	244398493	244408493	ENSG00000035687.10	0	-
chr6	155236133	155256133	ENSG00000029639.12	0	-
chr6	166912112	166922112	ENSG00000026297.18	0	-
chr11	94405569	94415569	ENSG00000020922.14	0	-
chr20	52031662	52051662	ENSG00000020256.21	0	-
chr17	43034291	43044291	ENSG00000012048.27	0	-
chr12	47651248	47661248	ENSG00000005175.11	0	-
chr1	32997985	33007985	ENSG00000004455.19	0	-
chr7	92182497	92197497	ENSG00000001631.18	0	-

## Sheet: Ctrl_SERIPH1st_1.dogs
chromosome	start	end	gene_id	unused_field	strand
chr7	141655244	141665244	ENSG00000006530.19	0	+
chr6	16151367	16161367	ENSG00000007944.16	0	+
chr1	231355023	231365023	ENSG00000010072.17	0	+
chr17	32381885	32396885	ENSG00000010244.20	0	+
chr22	50524780	50534780	ENSG00000025770.20	0	+
chr6	1613897	1638897	ENSG00000054598.9	0	+
chr1	109600195	109610195	ENSG00000065135.13	0	+
chr1	15940456	15950456	ENSG00000065526.13	0	+
chr11	612225	627225	ENSG00000070047.14	0	+
chr1	22101360	22126360	ENSG00000070831.19	0	+
chr4	5814305	5829305	ENSG00000072840.14	0	+
chr5	257083	267083	ENSG00000073578.19	0	+
chr4	40158252	40168252	ENSG00000078177.16	0	+
chr2	216206303	216221303	ENSG00000079246.17	0	+
chr8	11839500	11849500	ENSG00000079459.15	0	+
chr1	113685923	113695923	ENSG00000081026.20	0	+
chr17	48061545	48071545	ENSG00000082641.17	0	+
chr1	46278482	46288482	ENSG00000085999.14	0	+
chr2	117832379	117842379	ENSG00000088205.14	0	+
chr15	43868414	43888414	ENSG00000092470.13	0	+
chr9	130887675	130897675	ENSG00000097007.21	0	+
chr22	35425431	35450431	ENSG00000100297.17	0	+
chr14	96954846	96964846	ENSG00000100749.10	0	+
chrX	76178755	76193755	ENSG00000102390.13	0	+
chr16	682870	692870	ENSG00000103266.12	0	+
chr16	4510352	4520352	ENSG00000103415.13	0	+
chr15	44563029	44573029	ENSG00000104131.14	0	+
chr8	30183639	30193639	ENSG00000104671.9	0	+
chr7	24694193	24714193	ENSG00000105926.17	0	+
chr10	58399220	58409220	ENSG00000108064.12	0	+
chr17	47949308	47959308	ENSG00000108439.12	0	+
chr4	108632886	108642886	ENSG00000109475.19	0	+
chr4	177362936	177372936	ENSG00000109674.5	0	+
chr12	122062044	122077044	ENSG00000110987.10	0	+
chr12	118033545	118043545	ENSG00000111445.15	0	+
chr6	36605911	36615911	ENSG00000112081.19	0	+
chr6	351355	361355	ENSG00000112679.15	0	+
chr5	667168	677168	ENSG00000112877.9	0	+
chr5	44820428	44835428	ENSG00000112996.12	0	+
chr5	80877147	80887147	ENSG00000113318.12	0	+
chr5	33469531	33479531	ENSG00000113407.15	0	+
chr1	93369493	93384493	ENSG00000117505.14	0	+
chr4	17634105	17644105	ENSG00000118579.13	0	+
chr6	108684774	108699774	ENSG00000118689.16	0	+
chr13	75607472	75617472	ENSG00000118939.20	0	+
chr9	107332192	107342192	ENSG00000119318.14	0	+
chr1	31365527	31375527	ENSG00000121766.17	0	+
chr10	58289586	58299586	ENSG00000122873.13	0	+
chr6	110895714	110905714	ENSG00000123505.21	0	+
chr5	151492379	151507379	ENSG00000123643.15	0	+
chr20	49097015	49107015	ENSG00000124207.18	0	+
chr9	136929221	136944221	ENSG00000127191.20	0	+
chr15	40394288	40404288	ENSG00000128944.14	0	+
chr7	56080670	56090670	ENSG00000129103.20	0	+
chr17	67744531	67754531	ENSG00000130935.11	0	+
chr5	139628434	139638434	ENSG00000131508.18	0	+
chr11	6484683	6494683	ENSG00000132286.13	0	+
chr13	36829104	36844104	ENSG00000133111.4	0	+
chr1	116990358	117000358	ENSG00000134247.11	0	+
chr11	34147670	34157670	ENSG00000135372.11	0	+
chr1	229660887	229670887	ENSG00000135763.11	0	+
chr17	49835026	49845026	ENSG00000136504.15	0	+
chr10	17716824	17726824	ENSG00000136738.16	0	+
chr9	37503701	37513701	ENSG00000137054.17	0	+
chr2	24822376	24832376	ENSG00000138092.12	0	+
chr10	68694586	68704586	ENSG00000138336.10	0	+
chr2	215349773	215364773	ENSG00000138363.16	0	+
chr3	122881139	122891139	ENSG00000138463.10	0	+
chr12	34029694	34039694	ENSG00000139133.7	0	+
chr13	77764242	77779242	ENSG00000139737.23	0	+
chr16	2603190	2623190	ENSG00000140992.21	0	+
chr17	68422731	68432731	ENSG00000141337.13	0	+
chr1	23696835	23706835	ENSG00000142676.15	0	+
chr1	165911618	165926618	ENSG00000143179.17	0	+
chr1	161363206	161373206	ENSG00000143252.18	0	+
chr1	219220700	219230700	ENSG00000143353.13	0	+
chr4	82461177	82471177	ENSG00000145293.18	0	+
chr5	151812911	151827911	ENSG00000145907.17	0	+
chr2	241225993	241240993	ENSG00000146205.16	0	+
chr8	41545030	41555030	ENSG00000147536.12	0	+
chr8	73048123	73068123	ENSG00000147601.16	0	+
chr11	43857741	43867741	ENSG00000149084.14	0	+
chr10	112818744	112828744	ENSG00000151532.16	0	+
chr10	14904315	14914315	ENSG00000152455.17	0	+
chr10	123170467	123205467	ENSG00000154473.19	0	+
chr8	91087095	91097095	ENSG00000155100.12	0	+
chr21	15880064	15890064	ENSG00000155313.17	0	+
chr5	154817605	154842605	ENSG00000155506.20	0	+
chr15	59125045	59140045	ENSG00000157456.9	0	+
chr16	67929676	67949676	ENSG00000159792.10	0	+
chr21	42913304	42923304	ENSG00000160194.19	0	+
chr21	43805757	43820757	ENSG00000160214.14	0	+
chr5	179777283	179787283	ENSG00000161021.14	0	+
chr2	60931612	60941612	ENSG00000162924.17	0	+
chr2	183163114	183198114	ENSG00000163002.14	0	+
chr8	103443579	103453579	ENSG00000164934.16	0	+
chr9	136724742	136734742	ENSG00000165716.12	0	+
chr10	98245624	98260624	ENSG00000166024.15	0	+
chr11	94876748	94886748	ENSG00000166025.19	0	+
chr10	100559998	100569998	ENSG00000166135.15	0	+
chr11	74842413	74852413	ENSG00000166439.7	0	+
chr19	4445018	4455018	ENSG00000167670.17	0	+
chr11	61446839	61461839	ENSG00000167985.9	0	+
chr6	57059041	57079041	ENSG00000168116.16	0	+
chr1	229305894	229315894	ENSG00000168118.13	0	+
chr4	26435131	26445131	ENSG00000168214.23	0	+
chr4	37863028	37873028	ENSG00000169299.15	0	+
chr15	78595269	78605269	ENSG00000169684.14	0	+
chr1	1311677	1321677	ENSG00000169972.14	0	+
chr3	44660791	44670791	ENSG00000169981.12	0	+
chr10	60796236	60811236	ENSG00000170312.18	0	+
chr15	38487710	38507710	ENSG00000171262.11	0	+
chr17	792509	802509	ENSG00000171861.12	0	+
chr1	241895148	241905148	ENSG00000174371.18	0	+
chr15	84627796	84647796	ENSG00000176371.15	0	+
chr17	1003671	1013671	ENSG00000177370.6	0	+
chr19	57330770	57340770	ENSG00000178229.9	0	+
chr17	8270491	8280491	ENSG00000178921.15	0	+
chr1	28539300	28549300	ENSG00000180198.18	0	+
chr7	30370457	30380457	ENSG00000180233.12	0	+
chr7	30162765	30177765	ENSG00000180354.17	0	+
chrX	155123077	155133077	ENSG00000185515.16	0	+
chr15	78903078	78913078	ENSG00000185787.17	0	+
chr1	147993592	148003592	ENSG00000188092.16	0	+
chr19	37248740	37268740	ENSG00000188283.13	0	+
chr19	9351162	9361162	ENSG00000188321.15	0	+
chr7	64833681	64843681	ENSG00000197008.10	0	+
chr7	149183042	149193042	ENSG00000197024.10	0	+
chr12	53481162	53491162	ENSG00000197111.17	0	+
chr19	57865117	57875117	ENSG00000198466.13	0	+
chr4	163520733	163545733	ENSG00000198498.11	0	+
chr2	104858574	104868574	ENSG00000198914.5	0	+
chr1	52894998	52904998	ENSG00000203995.11	0	+
chr8	80526265	80541265	ENSG00000205189.14	0	+
chr19	24129968	24144968	ENSG00000213096.11	0	+
chr1	109096935	109106935	ENSG00000215717.8	0	+
chr7	102809552	102824552	ENSG00000222011.10	0	+
chr17	81241310	81251310	ENSG00000224877.4	0	+
chr3	10294903	10309903	ENSG00000240288.8	0	+
chr12	54122235	54137235	ENSG00000249388.4	0	+
chr3	101685669	101700669	ENSG00000256628.6	0	+
chr14	64944591	64959591	ENSG00000258289.11	0	+
chr1	149839767	149849767	ENSG00000270882.3	0	+
chr15	96345651	96355651	ENSG00000275322.2	0	+
chr15	30649529	30689529	ENSG00000285077.4	0	+
chr4	415434	425434	ENSG00000293360.1	0	-
chr17	64921424	64966424	ENSG00000291140.2	0	-
chr7	102527918	102562132	ENSG00000285437.3	0	-
chr20	62376294	62386294	ENSG00000273619.3	0	-
chr1	149844044	149854044	ENSG00000270276.3	0	-
chr7	102627024	102637024	ENSG00000267368.2	0	-
chr14	24199614	24209614	ENSG00000254505.12	0	-
chr19	12515372	12525372	ENSG00000249709.8	0	-
chr17	18655750	18680750	ENSG00000240445.6	0	-
chr9	136104579	136114579	ENSG00000238227.9	0	-
chrX	73810648	73820648	ENSG00000229807.15	0	-
chr5	80616225	80626225	ENSG00000228716.8	0	-
chr2	27060469	27070469	ENSG00000228474.7	0	-
chr7	102645367	102665367	ENSG00000228049.8	0	-
chr19	54426708	54436708	ENSG00000226696.9	0	-
chr10	49434167	49454167	ENSG00000225830.17	0	-
chr22	38280690	38290690	ENSG00000213923.14	0	-
chr16	88799338	88809338	ENSG00000198931.12	0	-
chr5	37086227	37106227	ENSG00000197603.17	0	-
chr8	30563317	30578317	ENSG00000197265.10	0	-
chr9	96795489	96815489	ENSG00000196597.14	0	-
chr1	117838484	117863484	ENSG00000196505.12	0	-
chr19	37725832	37735832	ENSG00000189144.16	0	-
chr9	137233583	137243583	ENSG00000188163.8	0	-
chrX	57078550	57118550	ENSG00000186787.11	0	-
chr17	1769484	1779484	ENSG00000186532.13	0	-
chr15	101596443	101621443	ENSG00000184277.14	0	-
chr8	93713154	93728154	ENSG00000183808.13	0	-
chr17	81877834	81887834	ENSG00000183684.9	0	-
chr10	123997667	124007667	ENSG00000182022.19	0	-
chr17	202388	212388	ENSG00000181031.17	0	-
chr6	44092289	44112289	ENSG00000180992.8	0	-
chr22	27841668	27851668	ENSG00000180957.19	0	-
chr8	479802	489802	ENSG00000180190.13	0	-
chr16	30408614	30423614	ENSG00000179958.10	0	-
chr17	729420	744420	ENSG00000179409.11	0	-
chr15	74620556	74630556	ENSG00000179151.14	0	-
chr19	57793840	57803840	ENSG00000178935.5	0	-
chr2	95811918	95836918	ENSG00000174501.15	0	-
chr12	94281448	94306448	ENSG00000173588.17	0	-
chr10	94323225	94333225	ENSG00000173145.12	0	-
chr3	129376320	129401320	ENSG00000172771.13	0	-
chr8	33360823	33370823	ENSG00000172728.17	0	-
chr2	42427016	42442016	ENSG00000171126.8	0	-
chr15	75583082	75598082	ENSG00000169371.15	0	-
chr17	41966420	41976420	ENSG00000168259.18	0	-
chr10	117267273	117277273	ENSG00000165650.13	0	-
chr11	126182094	126202094	ENSG00000165526.10	0	-
chr8	103383634	103398634	ENSG00000164933.13	0	-
chr7	21884973	21899973	ENSG00000164649.21	0	-
chr7	107191371	107201371	ENSG00000164597.16	0	-
chr3	108539863	108549863	ENSG00000163507.16	0	-
chr16	31406	46406	ENSG00000161980.7	0	-
chr17	44024327	44034327	ENSG00000161654.11	0	-
chr8	144496287	144511287	ENSG00000160957.16	0	-
chr19	40309535	40319535	ENSG00000160392.15	0	-
chr21	43757510	43772510	ENSG00000160213.11	0	-
chr21	42828012	42843012	ENSG00000160193.13	0	-
chr3	138041986	138061986	ENSG00000158163.16	0	-
chr3	9827801	9837801	ENSG00000156990.15	0	-
chr11	107311600	107321600	ENSG00000152404.17	0	-
chr5	10210506	10225506	ENSG00000150756.15	0	-
chr11	108145279	108155279	ENSG00000149308.19	0	-
chr9	133396058	133406058	ENSG00000148300.13	0	-
chr8	22610417	22620417	ENSG00000147439.15	0	-
chr6	87503458	87513458	ENSG00000146282.20	0	-
chr5	178139458	178149458	ENSG00000145912.11	0	-
chr2	73741781	73761781	ENSG00000144048.13	0	-
chr1	156695795	156720795	ENSG00000143319.19	0	-
chr1	67397809	67407809	ENSG00000142864.16	0	-
chr19	36309452	36334452	ENSG00000142065.15	0	-
chr12	31265583	31280583	ENSG00000139146.15	0	-
chr4	82341522	82351522	ENSG00000138668.21	0	-
chr11	111716907	111726907	ENSG00000137713.17	0	-
chr9	100292071	100302071	ENSG00000136891.15	0	-
chr10	21746537	21756537	ENSG00000136770.12	0	-
chr17	57970918	58000918	ENSG00000136450.13	0	-
chr7	47951881	47961881	ENSG00000136273.15	0	-
chr1	180942711	180972711	ENSG00000135823.14	0	-
chr6	109356513	109366513	ENSG00000135535.18	0	-
chr6	85587778	85607778	ENSG00000135316.20	0	-
chr9	83637385	83657385	ENSG00000135018.15	0	-
chr5	115603209	115613209	ENSG00000134970.15	0	-
chr12	92125277	92140277	ENSG00000133639.6	0	-
chr17	73197352	73207352	ENSG00000133193.14	0	-
chr13	45323470	45333470	ENSG00000133112.18	0	-
chr1	71053250	71063250	ENSG00000132485.15	0	-
chr7	50434127	50444127	ENSG00000132436.14	0	-
chr3	15550581	15560581	ENSG00000131373.16	0	-
chr16	85656197	85676197	ENSG00000131153.10	0	-
chr6	149494494	149504494	ENSG00000131013.5	0	-
chrX	136203219	136213219	ENSG00000129680.17	0	-
chr1	25821912	25831912	ENSG00000127423.11	0	-
chr14	55138109	55148109	ENSG00000126787.14	0	-
chr14	60633420	60643420	ENSG00000126778.13	0	-
chr13	113167535	113177535	ENSG00000126226.23	0	-
chr1	23278770	23303770	ENSG00000125944.23	0	-
chr16	58504950	58519950	ENSG00000125107.20	0	-
chr13	51915435	51930435	ENSG00000123191.19	0	-
chr12	113806737	113816737	ENSG00000122965.12	0	-
chr10	73105154	73130154	ENSG00000122882.12	0	-
chr7	33004112	33014112	ENSG00000122643.25	0	-
chr13	19664751	19674751	ENSG00000121390.20	0	-
chr12	101383115	101393115	ENSG00000120805.15	0	-
chr9	112200070	112215070	ENSG00000119314.18	0	-
chr1	236539004	236549004	ENSG00000119285.12	0	-
chr15	80931288	80946288	ENSG00000117899.12	0	-
chr1	119015283	119030283	ENSG00000116874.13	0	-
chr1	111429889	111439889	ENSG00000116455.14	0	-
chr2	99308981	99318981	ENSG00000115514.13	0	-
chr3	156524552	156539552	ENSG00000114850.8	0	-
chr3	131452201	131462201	ENSG00000114686.10	0	-
chr3	167668297	167683297	ENSG00000114209.16	0	-
chr15	25323727	25333727	ENSG00000114062.23	0	-
chr5	134133934	134148934	ENSG00000113558.20	0	-
chr6	122433347	122443347	ENSG00000111897.8	0	-
chr11	90185428	90200428	ENSG00000110172.13	0	-
chr4	24507440	24517440	ENSG00000109606.14	0	-
chr17	50347856	50367856	ENSG00000108826.17	0	-
chr17	19894301	19904301	ENSG00000108599.16	0	-
chr10	30299800	30309800	ENSG00000107951.16	0	-
chr9	136837114	136862114	ENSG00000107223.14	0	-
chr9	112030776	112040776	ENSG00000106868.18	0	-
chr7	128287684	128297684	ENSG00000106344.9	0	-
chr19	39815349	39825349	ENSG00000105204.14	0	-
chr16	87686484	87696484	ENSG00000104731.15	0	-
chr8	65592455	65602455	ENSG00000104442.11	0	-
chr16	19691936	19701936	ENSG00000103550.15	0	-
chr20	34260267	34280267	ENSG00000101444.13	0	-
chr22	29495878	29505878	ENSG00000100296.15	0	-
chr14	21197374	21207374	ENSG00000092199.20	0	-
chr20	2471816	2481816	ENSG00000088876.14	0	-
chr4	8355884	8365884	ENSG00000087008.17	0	-
chr5	154877410	154887410	ENSG00000082516.9	0	-
chr19	49330584	49340584	ENSG00000074219.15	0	-
chr3	185633129	185643129	ENSG00000073792.17	0	-
chr12	270056	280056	ENSG00000073614.13	0	-
chr19	637525	647525	ENSG00000070423.19	0	-
chr12	26889249	26904249	ENSG00000064102.16	0	-
chr1	19291990	19301990	ENSG00000053371.14	0	-
chr1	244398493	244408493	ENSG00000035687.10	0	-
chr19	5906138	5916138	ENSG00000031823.15	0	-
chr6	155241133	155256133	ENSG00000029639.12	0	-
chr1	32997985	33007985	ENSG00000004455.19	0	-

## Sheet: Ctrl_SERIPH1st_2.dogs
chromosome	start	end	gene_id	unused_field	strand
chr1	169855456	169870456	ENSG00000000460.18	0	+
chr7	141655244	141665244	ENSG00000006530.19	0	+
chr1	231355023	231365023	ENSG00000010072.17	0	+
chr17	32381885	32391885	ENSG00000010244.20	0	+
chr6	122433119	122443119	ENSG00000025156.14	0	+
chr22	50524780	50534780	ENSG00000025770.20	0	+
chr12	95302799	95312799	ENSG00000028203.20	0	+
chr6	1613897	1633897	ENSG00000054598.9	0	+
chr6	149591748	149601748	ENSG00000055211.15	0	+
chr1	42703805	42718805	ENSG00000065978.20	0	+
chr4	5814305	5829305	ENSG00000072840.14	0	+
chr5	257083	267083	ENSG00000073578.19	0	+
chr2	171750158	171765158	ENSG00000077380.17	0	+
chr4	40158252	40168252	ENSG00000078177.16	0	+
chr2	216206303	216221303	ENSG00000079246.17	0	+
chr8	11839500	11849500	ENSG00000079459.15	0	+
chr1	113685923	113695923	ENSG00000081026.20	0	+
chr17	48061545	48071545	ENSG00000082641.17	0	+
chr2	117832379	117842379	ENSG00000088205.14	0	+
chr20	31801805	31811805	ENSG00000088325.17	0	+
chr15	43868414	43893414	ENSG00000092470.13	0	+
chr17	76781449	76791449	ENSG00000092931.13	0	+
chr3	38421348	38431348	ENSG00000093217.12	0	+
chr22	35425431	35455431	ENSG00000100297.17	0	+
chr20	5197887	5207887	ENSG00000101290.15	0	+
chrX	76178755	76193755	ENSG00000102390.13	0	+
chr16	682870	692870	ENSG00000103266.12	0	+
chr15	65891989	65906989	ENSG00000103769.11	0	+
chr8	30183639	30198639	ENSG00000104671.9	0	+
chr8	15766649	15781649	ENSG00000104723.22	0	+
chr19	30016612	30031612	ENSG00000105176.19	0	+
chr7	24694193	24714193	ENSG00000105926.17	0	+
chr9	5776557	5786557	ENSG00000107036.13	0	+
chr9	35758600	35768600	ENSG00000107185.11	0	+
chr10	111017307	111027307	ENSG00000108061.14	0	+
chr17	47949308	47959308	ENSG00000108439.12	0	+
chr4	41960803	41970803	ENSG00000109133.15	0	+
chr4	108632886	108647886	ENSG00000109475.19	0	+
chr4	177362936	177372936	ENSG00000109674.5	0	+
chr4	17844865	17854865	ENSG00000109805.11	0	+
chr12	122062044	122077044	ENSG00000110987.10	0	+
chr12	118033545	118043545	ENSG00000111445.15	0	+
chr12	101744140	101754140	ENSG00000111666.12	0	+
chr12	118418033	118428033	ENSG00000111707.13	0	+
chr6	36605911	36615911	ENSG00000112081.19	0	+
chr6	133532128	133542128	ENSG00000112319.22	0	+
chr5	667168	677168	ENSG00000112877.9	0	+
chr5	44820428	44840428	ENSG00000112996.12	0	+
chr5	80877147	80887147	ENSG00000113318.12	0	+
chr5	33469531	33479531	ENSG00000113407.15	0	+
chr1	117107453	117117453	ENSG00000116830.13	0	+
chr1	145670980	145680980	ENSG00000117262.20	0	+
chr1	93369493	93384493	ENSG00000117505.14	0	+
chr4	17634105	17644105	ENSG00000118579.13	0	+
chr6	108684774	108699774	ENSG00000118689.16	0	+
chr13	75607472	75617472	ENSG00000118939.20	0	+
chr9	107332192	107342192	ENSG00000119318.14	0	+
chr9	116701300	116711300	ENSG00000119401.12	0	+
chr9	4885917	4895917	ENSG00000120158.12	0	+
chr10	58289586	58304586	ENSG00000122873.13	0	+
chr1	50974634	51004634	ENSG00000123080.13	0	+
chr6	110895714	110905714	ENSG00000123505.21	0	+
chr5	151492379	151502379	ENSG00000123643.15	0	+
chr20	49097015	49107015	ENSG00000124207.18	0	+
chr9	136929221	136939221	ENSG00000127191.20	0	+
chr15	40394288	40404288	ENSG00000128944.14	0	+
chr4	176332245	176342245	ENSG00000129128.13	0	+
chr1	147295767	147305767	ENSG00000131778.21	0	+
chr11	6484683	6494683	ENSG00000132286.13	0	+
chr13	36829104	36844104	ENSG00000133111.4	0	+
chr11	34147670	34157670	ENSG00000135372.11	0	+
chr1	229660887	229670887	ENSG00000135763.11	0	+
chr2	218755416	218765416	ENSG00000135912.12	0	+
chr2	159771027	159781027	ENSG00000136536.16	0	+
chr10	17716824	17726824	ENSG00000136738.16	0	+
chr9	97673748	97683748	ENSG00000136937.14	0	+
chr9	37503701	37513701	ENSG00000137054.17	0	+
chr2	24822376	24832376	ENSG00000138092.12	0	+
chr10	68694586	68704586	ENSG00000138336.10	0	+
chr2	215349773	215369773	ENSG00000138363.16	0	+
chr3	122881139	122891139	ENSG00000138463.10	0	+
chr12	34029694	34039694	ENSG00000139133.7	0	+
chr13	77764242	77779242	ENSG00000139737.23	0	+
chr14	51257655	51277655	ENSG00000139921.14	0	+
chr15	89631056	89641056	ENSG00000140534.15	0	+
chr16	2603190	2618190	ENSG00000140992.21	0	+
chr1	23696835	23706835	ENSG00000142676.15	0	+
chr1	165911618	165931618	ENSG00000143179.17	0	+
chr1	161363206	161373206	ENSG00000143252.18	0	+
chr1	219220700	219230700	ENSG00000143353.13	0	+
chr1	225790670	225800670	ENSG00000143742.15	0	+
chr1	224193441	224203441	ENSG00000143753.15	0	+
chr4	82461177	82471177	ENSG00000145293.18	0	+
chr5	151812911	151827911	ENSG00000145907.17	0	+
chr2	241225993	241245993	ENSG00000146205.16	0	+
chr8	41545030	41555030	ENSG00000147536.12	0	+
chr8	73048123	73068123	ENSG00000147601.16	0	+
chr11	43857741	43867741	ENSG00000149084.14	0	+
chr10	112818744	112828744	ENSG00000151532.16	0	+
chr10	14904315	14914315	ENSG00000152455.17	0	+
chr10	123170467	123205467	ENSG00000154473.19	0	+
chr8	91087095	91097095	ENSG00000155100.12	0	+
chr21	15880064	15895064	ENSG00000155313.17	0	+
chr5	154817605	154842605	ENSG00000155506.20	0	+
chrX	134428792	134438792	ENSG00000156531.19	0	+
chr15	59125045	59140045	ENSG00000157456.9	0	+
chr5	179777283	179787283	ENSG00000161021.14	0	+
chr2	60931612	60941612	ENSG00000162924.17	0	+
chr2	183163114	183173114	ENSG00000163002.14	0	+
chr2	108885477	108895477	ENSG00000163006.13	0	+
chr3	155944020	155954020	ENSG00000163655.17	0	+
chr3	156706770	156716770	ENSG00000163659.14	0	+
chr1	42852477	42862477	ENSG00000164011.19	0	+
chr8	103443579	103453579	ENSG00000164934.16	0	+
chr12	12471233	12481233	ENSG00000165714.12	0	+
chr10	98245624	98260624	ENSG00000166024.15	0	+
chr11	94876748	94891748	ENSG00000166025.19	0	+
chr10	100559998	100569998	ENSG00000166135.15	0	+
chr11	74842413	74857413	ENSG00000166439.7	0	+
chr19	44178381	44198381	ENSG00000167380.18	0	+
chr19	4445018	4455018	ENSG00000167670.17	0	+
chr11	61446839	61476839	ENSG00000167985.9	0	+
chr6	57059041	57084041	ENSG00000168116.16	0	+
chr1	229305894	229325894	ENSG00000168118.13	0	+
chr4	26435131	26445131	ENSG00000168214.23	0	+
chr3	158695836	158715836	ENSG00000168827.16	0	+
chr3	161253532	161263532	ENSG00000169251.14	0	+
chr4	37863028	37878028	ENSG00000169299.15	0	+
chr15	78595269	78605269	ENSG00000169684.14	0	+
chr1	1311677	1321677	ENSG00000169972.14	0	+
chr3	44660791	44670791	ENSG00000169981.12	0	+
chr10	60796236	60811236	ENSG00000170312.18	0	+
chr15	38487710	38507710	ENSG00000171262.11	0	+
chr17	792509	802509	ENSG00000171861.12	0	+
chr2	227561217	227571217	ENSG00000173744.19	0	+
chr15	84627796	84647796	ENSG00000176371.15	0	+
chr19	57330770	57340770	ENSG00000178229.9	0	+
chr17	8270491	8280491	ENSG00000178921.15	0	+
chr1	28539300	28549300	ENSG00000180198.18	0	+
chr7	30370457	30380457	ENSG00000180233.12	0	+
chr7	30162765	30177765	ENSG00000180354.17	0	+
chrX	155123077	155133077	ENSG00000185515.16	0	+
chr15	78903078	78913078	ENSG00000185787.17	0	+
chr19	57447101	57457101	ENSG00000186230.7	0	+
chr19	57421934	57431934	ENSG00000186272.14	0	+
chr1	40464142	40474142	ENSG00000187801.16	0	+
chr1	147993592	148003592	ENSG00000188092.16	0	+
chr7	64833681	64843681	ENSG00000197008.10	0	+
chr7	149183042	149193042	ENSG00000197024.10	0	+
chr7	99632408	99647408	ENSG00000197037.12	0	+
chr12	53481162	53491162	ENSG00000197111.17	0	+
chr19	57865117	57875117	ENSG00000198466.13	0	+
chr4	163520733	163540733	ENSG00000198498.11	0	+
chr2	104858574	104868574	ENSG00000198914.5	0	+
chr6	126348875	126368875	ENSG00000203760.10	0	+
chr1	52894998	52904998	ENSG00000203995.11	0	+
chr8	80526265	80541265	ENSG00000205189.14	0	+
chr1	168253021	168263021	ENSG00000213064.11	0	+
chr19	24129968	24144968	ENSG00000213096.11	0	+
chr1	109096935	109106935	ENSG00000215717.8	0	+
chr7	102809552	102834552	ENSG00000222011.10	0	+
chr17	81241310	81251310	ENSG00000224877.4	0	+
chr3	10294903	10304903	ENSG00000240288.8	0	+
chr2	197708395	197718395	ENSG00000247626.5	0	+
chr12	54122235	54137235	ENSG00000249388.4	0	+
chr7	27172207	27182207	ENSG00000253187.3	0	+
chr3	101685669	101700669	ENSG00000256628.6	0	+
chr1	149839767	149849767	ENSG00000270882.3	0	+
chr15	30649529	30689529	ENSG00000285077.4	0	+
chr10	46815125	46825125	ENSG00000291069.2	0	+
chr17	64921424	64966424	ENSG00000291140.2	0	-
chr1	149844044	149854044	ENSG00000270276.3	0	-
chr7	102627024	102637024	ENSG00000267368.2	0	-
chr14	30402074	30412074	ENSG00000257636.7	0	-
chr14	24199614	24209614	ENSG00000254505.12	0	-
chr8	90948083	90958083	ENSG00000253250.4	0	-
chr17	18655750	18680750	ENSG00000240445.6	0	-
chr17	15426014	15436014	ENSG00000239704.13	0	-
chrX	73810648	73820648	ENSG00000229807.15	0	-
chr2	27060469	27070469	ENSG00000228474.7	0	-
chr7	102645367	102665367	ENSG00000228049.8	0	-
chr10	49434167	49454167	ENSG00000225830.17	0	-
chr15	72330923	72340923	ENSG00000213614.12	0	-
chr22	42048333	42058333	ENSG00000198951.13	0	-
chr5	37086227	37106227	ENSG00000197603.17	0	-
chr8	30563317	30578317	ENSG00000197265.10	0	-
chr9	96785489	96815489	ENSG00000196597.14	0	-
chr1	117838484	117863484	ENSG00000196505.12	0	-
chr19	37725832	37735832	ENSG00000189144.16	0	-
chr6	143412831	143422831	ENSG00000189007.17	0	-
chr6	8003565	8013565	ENSG00000188428.21	0	-
chr9	137233583	137243583	ENSG00000188163.8	0	-
chrX	57073550	57118550	ENSG00000186787.11	0	-
chr17	1769484	1779484	ENSG00000186532.13	0	-
chr1	222658012	222668012	ENSG00000186063.14	0	-
chr10	74110254	74120254	ENSG00000185009.14	0	-
chr2	19886630	19896630	ENSG00000183891.7	0	-
chr8	93718154	93728154	ENSG00000183808.13	0	-
chr17	81877834	81887834	ENSG00000183684.9	0	-
chr21	39164768	39174768	ENSG00000183527.13	0	-
chrX	14665387	14690387	ENSG00000181544.17	0	-
chr17	202388	212388	ENSG00000181031.17	0	-
chr6	44092289	44112289	ENSG00000180992.8	0	-
chr22	27841668	27851668	ENSG00000180957.19	0	-
chr16	30408614	30423614	ENSG00000179958.10	0	-
chr17	734420	744420	ENSG00000179409.11	0	-
chr15	74620556	74630556	ENSG00000179151.14	0	-
chr19	57793840	57803840	ENSG00000178935.5	0	-
chr2	95811918	95836918	ENSG00000174501.15	0	-
chr12	94276448	94306448	ENSG00000173588.17	0	-
chr10	94323225	94333225	ENSG00000173145.12	0	-
chr4	83251535	83261535	ENSG00000173085.15	0	-
chr7	64499877	64519877	ENSG00000173041.13	0	-
chr3	129371320	129401320	ENSG00000172771.13	0	-
chr8	33360823	33370823	ENSG00000172728.17	0	-
chr3	178950120	178960120	ENSG00000172667.12	0	-
chr3	169783002	169793002	ENSG00000171757.18	0	-
chr2	42427016	42442016	ENSG00000171126.8	0	-
chr8	10886044	10896044	ENSG00000171044.11	0	-
chr15	33848781	33858781	ENSG00000169857.10	0	-
chr15	75583082	75598082	ENSG00000169371.15	0	-
chr7	40116026	40126026	ENSG00000168303.9	0	-
chr10	117267273	117277273	ENSG00000165650.13	0	-
chr11	126182094	126202094	ENSG00000165526.10	0	-
chr8	103373634	103398634	ENSG00000164933.13	0	-
chr7	21884973	21899973	ENSG00000164649.21	0	-
chr7	107186371	107201371	ENSG00000164597.16	0	-
chr5	127035234	127045234	ENSG00000164241.14	0	-
chr3	47485639	47495639	ENSG00000163832.17	0	-
chr3	63823869	63833869	ENSG00000163634.12	0	-
chr3	108539863	108549863	ENSG00000163507.16	0	-
chr2	31855059	31865059	ENSG00000162959.15	0	-
chr1	77934054	77944054	ENSG00000162613.19	0	-
chr16	31406	46406	ENSG00000161980.7	0	-
chr17	44024327	44034327	ENSG00000161654.11	0	-
chr21	43762510	43772510	ENSG00000160213.11	0	-
chr21	42833012	42843012	ENSG00000160193.13	0	-
chr3	138041986	138061986	ENSG00000158163.16	0	-
chr1	111105883	111115883	ENSG00000156171.16	0	-
chr21	25560631	25585631	ENSG00000154719.15	0	-
chr16	8842941	8852941	ENSG00000153048.12	0	-
chr11	107311600	107321600	ENSG00000152404.17	0	-
chr5	10205506	10225506	ENSG00000150756.15	0	-
chr8	22610417	22620417	ENSG00000147439.15	0	-
chr7	158608223	158628223	ENSG00000146918.21	0	-
chr7	12315200	12330200	ENSG00000146530.16	0	-
chr6	87503458	87513458	ENSG00000146282.20	0	-
chr5	173597144	173607144	ENSG00000145919.12	0	-
chr4	163100072	163110072	ENSG00000145414.10	0	-
chr4	67448761	67468761	ENSG00000145241.12	0	-
chr2	73741781	73761781	ENSG00000144048.13	0	-
chr1	156710795	156720795	ENSG00000143319.19	0	-
chr19	36309452	36334452	ENSG00000142065.15	0	-
chr12	31265583	31280583	ENSG00000139146.15	0	-
chr4	82341522	82351522	ENSG00000138668.21	0	-
chr11	111716907	111726907	ENSG00000137713.17	0	-
chr9	97659908	97674908	ENSG00000136936.12	0	-
chr9	100292071	100302071	ENSG00000136891.15	0	-
chr17	57970918	58000918	ENSG00000136450.13	0	-
chr7	47951881	47961881	ENSG00000136273.15	0	-
chr1	180957711	180972711	ENSG00000135823.14	0	-
chr6	109356513	109366513	ENSG00000135535.18	0	-
chr6	85587778	85607778	ENSG00000135316.20	0	-
chr9	83637385	83657385	ENSG00000135018.15	0	-
chr5	115603209	115613209	ENSG00000134970.15	0	-
chr15	34130364	34140364	ENSG00000134152.12	0	-
chr14	70571256	70581256	ENSG00000133997.13	0	-
chr12	92125277	92140277	ENSG00000133639.6	0	-
chr13	45323470	45333470	ENSG00000133112.18	0	-
chr20	44486220	44496220	ENSG00000132824.15	0	-
chr1	71053250	71063250	ENSG00000132485.15	0	-
chr7	50434127	50444127	ENSG00000132436.14	0	-
chr11	6585071	6595071	ENSG00000132275.12	0	-
chr16	85661197	85676197	ENSG00000131153.10	0	-
chr6	149494494	149504494	ENSG00000131013.5	0	-
chr1	25821912	25831912	ENSG00000127423.11	0	-
chr14	55138109	55148109	ENSG00000126787.14	0	-
chr13	113167535	113177535	ENSG00000126226.23	0	-
chr1	23278770	23303770	ENSG00000125944.23	0	-
chr16	58509950	58519950	ENSG00000125107.20	0	-
chr5	65487765	65517765	ENSG00000123219.14	0	-
chr12	113806737	113816737	ENSG00000122965.12	0	-
chr10	73105154	73130154	ENSG00000122882.12	0	-
chr7	33004112	33014112	ENSG00000122643.25	0	-
chr13	19664751	19674751	ENSG00000121390.20	0	-
chr12	101383115	101393115	ENSG00000120805.15	0	-
chr8	109220918	109240918	ENSG00000120526.13	0	-
chr9	112200070	112215070	ENSG00000119314.18	0	-
chr1	236534004	236549004	ENSG00000119285.12	0	-
chr15	80931288	80946288	ENSG00000117899.12	0	-
chr1	119015283	119030283	ENSG00000116874.13	0	-
chr1	66989349	66999349	ENSG00000116704.9	0	-
chr1	111429889	111439889	ENSG00000116455.14	0	-
chr2	99308981	99318981	ENSG00000115514.13	0	-
chr3	156524552	156539552	ENSG00000114850.8	0	-
chr3	131452201	131462201	ENSG00000114686.10	0	-
chr3	167668297	167683297	ENSG00000114209.16	0	-
chr15	25323727	25333727	ENSG00000114062.23	0	-
chr6	122433347	122443347	ENSG00000111897.8	0	-
chr12	112016688	112026688	ENSG00000111300.11	0	-
chr12	10594189	10604189	ENSG00000111196.12	0	-
chr11	90185428	90200428	ENSG00000110172.13	0	-
chr17	50347856	50367856	ENSG00000108826.17	0	-
chr17	19894301	19904301	ENSG00000108599.16	0	-
chr10	30299800	30309800	ENSG00000107951.16	0	-
chr9	112030776	112040776	ENSG00000106868.18	0	-
chr7	128287684	128297684	ENSG00000106344.9	0	-
chr19	39815349	39825349	ENSG00000105204.14	0	-
chr8	65592455	65602455	ENSG00000104442.11	0	-
chr16	19691936	19701936	ENSG00000103550.15	0	-
chr20	34260267	34280267	ENSG00000101444.13	0	-
chr22	29495878	29505878	ENSG00000100296.15	0	-
chr14	21197374	21207374	ENSG00000092199.20	0	-
chr20	2471816	2481816	ENSG00000088876.14	0	-
chr19	49325584	49340584	ENSG00000074219.15	0	-
chr3	185633129	185643129	ENSG00000073792.17	0	-
chr12	270056	280056	ENSG00000073614.13	0	-
chr1	205702821	205712821	ENSG00000069275.14	0	-
chr1	212353925	212363925	ENSG00000065600.14	0	-
chr16	75586867	75596867	ENSG00000065457.12	0	-
chr12	26894249	26904249	ENSG00000064102.16	0	-
chr1	19291990	19301990	ENSG00000053371.14	0	-
chr1	244393493	244408493	ENSG00000035687.10	0	-
chr6	155236133	155256133	ENSG00000029639.12	0	-
chr10	99695867	99710867	ENSG00000014919.14	0	-
chr1	32992985	33007985	ENSG00000004455.19	0	-

## Sheet: Ctrl_SERIPH2nd_1.dogs
chromosome	start	end	gene_id	unused_field	strand
chr1	169855456	169865456	ENSG00000000460.18	0	+
chr7	141655244	141665244	ENSG00000006530.19	0	+
chr1	231355023	231365023	ENSG00000010072.17	0	+
chr17	32381885	32411885	ENSG00000010244.20	0	+
chr14	60969965	60979965	ENSG00000020426.12	0	+
chr12	95302799	95312799	ENSG00000028203.20	0	+
chr5	55426065	55436065	ENSG00000039123.17	0	+
chr15	40732344	40747344	ENSG00000051180.18	0	+
chr6	1613897	1633897	ENSG00000054598.9	0	+
chr22	47175699	47185699	ENSG00000054611.15	0	+
chr2	202303666	202313666	ENSG00000055044.12	0	+
chr6	149591748	149601748	ENSG00000055211.15	0	+
chr12	911452	926452	ENSG00000060237.20	0	+
chr10	68792377	68802377	ENSG00000060339.15	0	+
chr1	15940456	15955456	ENSG00000065526.13	0	+
chr2	186511929	186521929	ENSG00000065548.20	0	+
chr1	42703805	42723805	ENSG00000065978.20	0	+
chr6	126203817	126428875	ENSG00000066651.21	0	+
chr11	612225	642225	ENSG00000070047.14	0	+
chr1	22101360	22126360	ENSG00000070831.19	0	+
chr4	5814305	5829305	ENSG00000072840.14	0	+
chr2	71437183	71447183	ENSG00000075292.21	0	+
chr14	103503831	103518831	ENSG00000075413.20	0	+
chr2	171750158	171775158	ENSG00000077380.17	0	+
chr11	74669117	74679117	ENSG00000077514.10	0	+
chr4	40158252	40168252	ENSG00000078177.16	0	+
chr2	216206303	216216303	ENSG00000079246.17	0	+
chr8	11839500	11849500	ENSG00000079459.15	0	+
chr2	151508013	151533013	ENSG00000080345.19	0	+
chr1	113685923	113695923	ENSG00000081026.20	0	+
chr17	48061545	48076545	ENSG00000082641.17	0	+
chr6	80351082	80431082	ENSG00000083123.16	0	+
chr13	73017823	73027823	ENSG00000083535.17	0	+
chrX	55758774	55788774	ENSG00000083750.14	0	+
chr1	40423326	40448326	ENSG00000084070.13	0	+
chr6	161117385	161132385	ENSG00000085511.21	0	+
chr1	46278482	46298482	ENSG00000085999.14	0	+
chr5	62629949	62639949	ENSG00000086200.18	0	+
chr19	54155708	54175708	ENSG00000088038.21	0	+
chr2	117832379	117842379	ENSG00000088205.14	0	+
chr20	31801805	31811805	ENSG00000088325.17	0	+
chr14	102730576	102740576	ENSG00000089902.11	0	+
chr14	76254342	76274342	ENSG00000089916.19	0	+
chr14	96567118	96577118	ENSG00000090060.20	0	+
chr15	43868414	43898414	ENSG00000092470.13	0	+
chr17	76781449	76791449	ENSG00000092931.13	0	+
chr22	19520612	19530612	ENSG00000093009.12	0	+
chr3	38421348	38441348	ENSG00000093217.12	0	+
chrX	75304885	75329885	ENSG00000094841.15	0	+
chr9	105776629	105861629	ENSG00000095209.13	0	+
chr10	92031437	92041437	ENSG00000095564.16	0	+
chr10	69507676	69517676	ENSG00000099282.11	0	+
chr22	35425431	35480431	ENSG00000100297.17	0	+
chr22	45342824	45352824	ENSG00000100376.13	0	+
chr14	96954846	97089846	ENSG00000100749.10	0	+
chr14	100282788	100292788	ENSG00000100811.15	0	+
chr18	13125053	13135053	ENSG00000101639.20	0	+
chrX	111760649	111775649	ENSG00000101901.14	0	+
chrX	115650861	115660861	ENSG00000102024.20	0	+
chrX	102938300	102953300	ENSG00000102128.8	0	+
chrX	21994837	22009837	ENSG00000102172.17	0	+
chrX	76178755	76188755	ENSG00000102390.13	0	+
chr16	682870	692870	ENSG00000103266.12	0	+
chr15	65891989	65921989	ENSG00000103769.11	0	+
chr15	44563029	44573029	ENSG00000104131.14	0	+
chr8	85481493	85491493	ENSG00000104267.11	0	+
chr8	15766649	15791649	ENSG00000104723.22	0	+
chr19	12813643	12823643	ENSG00000104889.8	0	+
chr19	46021318	46036318	ENSG00000104983.9	0	+
chr19	30016612	30056612	ENSG00000105176.19	0	+
chr7	24694193	24729193	ENSG00000105926.17	0	+
chr9	5776557	5791557	ENSG00000107036.13	0	+
chr9	35758600	35773600	ENSG00000107185.11	0	+
chr10	130184521	130194521	ENSG00000108010.13	0	+
chr10	111017307	111027307	ENSG00000108061.14	0	+
chr17	47949308	47964308	ENSG00000108439.12	0	+
chr4	108632886	108642886	ENSG00000109475.19	0	+
chr4	177362936	177372936	ENSG00000109674.5	0	+
chr4	26756223	26776223	ENSG00000109680.12	0	+
chr4	17844865	17854865	ENSG00000109805.11	0	+
chr11	63957319	63972319	ENSG00000110583.14	0	+
chr12	122062044	122152044	ENSG00000110987.10	0	+
chr12	101744140	101759140	ENSG00000111666.12	0	+
chr6	36605911	36615911	ENSG00000112081.19	0	+
chr6	133532128	133542128	ENSG00000112319.22	0	+
chr6	111231194	111246194	ENSG00000112394.19	0	+
chr6	170572870	170582870	ENSG00000112592.16	0	+
chr5	66082546	66097546	ENSG00000112851.17	0	+
chr5	667168	677168	ENSG00000112877.9	0	+
chr5	44820428	44840428	ENSG00000112996.12	0	+
chr5	80877147	80892147	ENSG00000113318.12	0	+
chr5	126837232	126892232	ENSG00000113368.13	0	+
chr5	33469531	33479531	ENSG00000113407.15	0	+
chr2	159232668	159242668	ENSG00000115183.16	0	+
chr2	74970128	75210128	ENSG00000115350.13	0	+
chr1	32858879	32868879	ENSG00000116497.19	0	+
chr1	117107453	117122453	ENSG00000116830.13	0	+
chr1	231566524	231581524	ENSG00000116918.16	0	+
chr1	145670980	145685980	ENSG00000117262.20	0	+
chr1	46369218	46379218	ENSG00000117481.13	0	+
chr1	93369493	93384493	ENSG00000117505.14	0	+
chr1	96823738	96833738	ENSG00000117569.21	0	+
chr4	17634105	17644105	ENSG00000118579.13	0	+
chr6	108684774	108709774	ENSG00000118689.16	0	+
chr13	75607472	75722472	ENSG00000118939.20	0	+
chr9	107332192	107347192	ENSG00000119318.14	0	+
chr9	129148946	129158946	ENSG00000119383.22	0	+
chr2	32316594	32356594	ENSG00000119820.12	0	+
chr10	94613905	94628905	ENSG00000119969.17	0	+
chr9	4885917	4895917	ENSG00000120158.12	0	+
chr1	31365527	31375527	ENSG00000121766.17	0	+
chrX	129592561	129602561	ENSG00000122126.19	0	+
chr10	58289586	58299586	ENSG00000122873.13	0	+
chr1	50974634	51009634	ENSG00000123080.13	0	+
chr1	51273447	51283447	ENSG00000123091.6	0	+
chr6	110895714	110905714	ENSG00000123505.21	0	+
chrX	13710504	13720504	ENSG00000123595.9	0	+
chr5	151492379	151517379	ENSG00000123643.15	0	+
chr20	58451101	58466101	ENSG00000124164.17	0	+
chr20	49097015	49107015	ENSG00000124207.18	0	+
chr6	2786952	2811952	ENSG00000124535.17	0	+
chr6	43450430	43460430	ENSG00000124574.17	0	+
chrX	102604159	102699159	ENSG00000125962.17	0	+
chr19	49626439	49636439	ENSG00000126464.15	0	+
chr17	30186475	30196475	ENSG00000126653.19	0	+
chr9	136929221	136944221	ENSG00000127191.20	0	+
chr12	69390870	69400870	ENSG00000127337.8	0	+
chr7	141791367	141811367	ENSG00000127366.5	0	+
chr7	131496632	131506632	ENSG00000128585.19	0	+
chr15	40394288	40404288	ENSG00000128944.14	0	+
chr7	56080670	56095670	ENSG00000129103.20	0	+
chr8	22006585	22021585	ENSG00000130227.18	0	+
chr19	5691881	5701881	ENSG00000130255.14	0	+
chr22	45845307	45865307	ENSG00000130638.18	0	+
chr17	67744531	67759531	ENSG00000130935.11	0	+
chr5	139628434	139638434	ENSG00000131508.18	0	+
chr7	134067137	134097137	ENSG00000131558.17	0	+
chr1	147295767	147305767	ENSG00000131778.21	0	+
chr11	6484683	6534683	ENSG00000132286.13	0	+
chr13	36829104	36844104	ENSG00000133111.4	0	+
chr13	33966558	33991558	ENSG00000133119.14	0	+
chr19	1981339	1991339	ENSG00000133275.17	0	+
chr7	152855378	152900378	ENSG00000133627.19	0	+
chr1	116990358	117000358	ENSG00000134247.11	0	+
chr18	10552766	10562766	ENSG00000134265.14	0	+
chr1	193264613	193279613	ENSG00000134371.16	0	+
chr19	47383247	47393247	ENSG00000134815.21	0	+
chr9	78330098	78365098	ENSG00000135069.15	0	+
chr11	34147670	34162670	ENSG00000135372.11	0	+
chr1	229660887	229670887	ENSG00000135763.11	0	+
chr2	218755416	218780416	ENSG00000135912.12	0	+
chr12	105169134	105194134	ENSG00000136051.16	0	+
chr7	6403998	6413998	ENSG00000136238.21	0	+
chr17	49835026	49850026	ENSG00000136504.15	0	+
chr2	159771027	159781027	ENSG00000136536.16	0	+
chr9	97673748	97683748	ENSG00000136937.14	0	+
chr9	37503701	37513701	ENSG00000137054.17	0	+
chr6	42939903	42949903	ENSG00000137161.19	0	+
chr1	93554661	93564661	ENSG00000137942.19	0	+
chr2	24822376	24832376	ENSG00000138092.12	0	+
chr10	89774939	89784939	ENSG00000138182.16	0	+
chr2	215349773	215369773	ENSG00000138363.16	0	+
chr12	34029694	34039694	ENSG00000139133.7	0	+
chr12	4694317	4704317	ENSG00000139180.12	0	+
chr13	77764242	77774242	ENSG00000139737.23	0	+
chr14	51257655	51282655	ENSG00000139921.14	0	+
chr15	77485955	77495955	ENSG00000140382.16	0	+
chr15	89631056	89641056	ENSG00000140534.15	0	+
chr16	2603190	2623190	ENSG00000140992.21	0	+
chr17	68422731	68432731	ENSG00000141337.13	0	+
chr1	23696835	23761835	ENSG00000142676.15	0	+
chr1	93139079	93154079	ENSG00000143033.19	0	+
chr1	165911618	165926618	ENSG00000143179.17	0	+
chr1	161363206	161373206	ENSG00000143252.18	0	+
chr1	219220700	219435700	ENSG00000143353.13	0	+
chr1	212107400	212147400	ENSG00000143476.19	0	+
chr1	246768137	246788137	ENSG00000143653.11	0	+
chr1	225790670	225800670	ENSG00000143742.15	0	+
chr2	138574458	138584458	ENSG00000144228.11	0	+
chr2	174430077	174440077	ENSG00000144306.16	0	+
chr2	173368997	173383997	ENSG00000144354.16	0	+
chr2	196763490	196773490	ENSG00000144395.18	0	+
chr2	231809254	231819254	ENSG00000144524.19	0	+
chr3	37366879	37376879	ENSG00000144674.20	0	+
chr3	49416476	49426476	ENSG00000145022.6	0	+
chr4	82461177	82471177	ENSG00000145293.18	0	+
chr5	134831121	134841121	ENSG00000145833.17	0	+
chr5	151812911	151832911	ENSG00000145907.17	0	+
chr2	241225993	241235993	ENSG00000146205.16	0	+
chr1	35422058	35432058	ENSG00000146463.13	0	+
chr7	139425496	139435496	ENSG00000146963.19	0	+
chr8	41545030	41555030	ENSG00000147536.12	0	+
chr8	73048123	73063123	ENSG00000147601.16	0	+
chr10	133422520	133477520	ENSG00000148824.20	0	+
chr11	61377890	61387890	ENSG00000149483.14	0	+
chr11	125041649	125056649	ENSG00000149548.16	0	+
chr14	31861226	31871226	ENSG00000151413.18	0	+
chr10	112818744	112883744	ENSG00000151532.16	0	+
chr2	172608669	172633669	ENSG00000152256.15	0	+
chr10	14904315	14914315	ENSG00000152455.17	0	+
chr10	123170467	123540467	ENSG00000154473.19	0	+
chr3	16350299	16390299	ENSG00000154814.15	0	+
chr8	91087095	91097095	ENSG00000155100.12	0	+
chr21	15880064	15895064	ENSG00000155313.17	0	+
chr5	154817605	154852605	ENSG00000155506.20	0	+
chr8	17302707	17312707	ENSG00000155975.11	0	+
chr21	29630751	29665751	ENSG00000156273.17	0	+
chrX	134428792	134443792	ENSG00000156531.19	0	+
chr6	38154624	38179624	ENSG00000156639.13	0	+
chr8	123470028	123480028	ENSG00000156795.9	0	+
chr1	52348671	52358671	ENSG00000157077.17	0	+
chr3	12192032	12262032	ENSG00000157152.17	0	+
chr15	59125045	59150045	ENSG00000157456.9	0	+
chr3	57278127	57288127	ENSG00000157500.13	0	+
chrX	110184260	110209260	ENSG00000157600.14	0	+
chr15	42720998	42735998	ENSG00000159433.12	0	+
chr16	67929676	67949676	ENSG00000159792.10	0	+
chr21	42913304	42923304	ENSG00000160194.19	0	+
chr21	43805757	43820757	ENSG00000160214.14	0	+
chr21	46572743	46582743	ENSG00000160305.20	0	+
chr5	179777283	179787283	ENSG00000161021.14	0	+
chr2	60931612	60941612	ENSG00000162924.17	0	+
chr2	183163114	183263114	ENSG00000163002.14	0	+
chr2	108885477	108905477	ENSG00000163006.13	0	+
chr3	31638548	31648548	ENSG00000163527.12	0	+
chr3	155944020	155969020	ENSG00000163655.17	0	+
chr3	57931461	57941461	ENSG00000163681.18	0	+
chr1	42852477	42862477	ENSG00000164011.19	0	+
chr4	174333380	174353380	ENSG00000164118.14	0	+
chr5	5490220	5550220	ENSG00000164151.12	0	+
chr8	93819234	93834234	ENSG00000164953.17	0	+
chr9	112669397	112699397	ENSG00000165185.16	0	+
chr8	31176138	31186138	ENSG00000165392.12	0	+
chr9	136427992	136437992	ENSG00000165688.15	0	+
chrX	134520513	134530513	ENSG00000165704.16	0	+
chr12	12471233	12481233	ENSG00000165714.12	0	+
chr10	98245624	98255624	ENSG00000166024.15	0	+
chr11	94876748	94891748	ENSG00000166025.19	0	+
chr10	100559998	100569998	ENSG00000166135.15	0	+
chr11	74842413	74877413	ENSG00000166439.7	0	+
chr17	39567559	39577559	ENSG00000167258.17	0	+
chr19	36238774	36253774	ENSG00000167635.13	0	+
chr19	4445018	4455018	ENSG00000167670.17	0	+
chr19	4502220	4512220	ENSG00000167674.16	0	+
chr11	61446839	61476839	ENSG00000167985.9	0	+
chr6	57059041	57169041	ENSG00000168116.16	0	+
chr1	229305894	229330894	ENSG00000168118.13	0	+
chr3	9479240	9499240	ENSG00000168137.21	0	+
chr4	26435131	26445131	ENSG00000168214.23	0	+
chr3	52295273	52315273	ENSG00000168237.19	0	+
chr2	241673857	241683857	ENSG00000168397.18	0	+
chr3	158695836	158730836	ENSG00000168827.16	0	+
chr3	161253532	161268532	ENSG00000169251.14	0	+
chr4	37863028	37873028	ENSG00000169299.15	0	+
chr15	78595269	78605269	ENSG00000169684.14	0	+
chr3	44660791	44670791	ENSG00000169981.12	0	+
chr3	23891640	23901640	ENSG00000170142.13	0	+
chr10	60796236	60806236	ENSG00000170312.18	0	+
chr17	15975746	15985746	ENSG00000170425.4	0	+
chr15	38487710	38507710	ENSG00000171262.11	0	+
chr2	10211725	10221725	ENSG00000171848.17	0	+
chr17	792509	802509	ENSG00000171861.12	0	+
chr5	70953942	70963942	ENSG00000172062.18	0	+
chr2	227561217	227571217	ENSG00000173744.19	0	+
chr11	66668380	66678380	ENSG00000173933.22	0	+
chr11	66606019	66616019	ENSG00000173992.10	0	+
chr1	241895148	241925148	ENSG00000174371.18	0	+
chr11	491399	501399	ENSG00000174915.13	0	+
chr3	141148613	141163613	ENSG00000175093.6	0	+
chr11	66244744	66254744	ENSG00000175115.13	0	+
chr10	131959834	131979834	ENSG00000175470.21	0	+
chr15	84627796	84647796	ENSG00000176371.15	0	+
chr12	56479708	56489708	ENSG00000176422.14	0	+
chr9	137109189	137119189	ENSG00000177239.17	0	+
chr19	57330770	57340770	ENSG00000178229.9	0	+
chr12	50120457	50135457	ENSG00000178449.10	0	+
chr17	8270491	8280491	ENSG00000178921.15	0	+
chr11	36232138	36277138	ENSG00000179241.14	0	+
chr1	28539300	28549300	ENSG00000180198.18	0	+
chr7	30370457	30430457	ENSG00000180233.12	0	+
chr7	30162765	30202765	ENSG00000180354.17	0	+
chr15	64686068	64701068	ENSG00000180357.11	0	+
chr3	144048719	144163719	ENSG00000181744.9	0	+
chr1	203871152	203881152	ENSG00000182004.14	0	+
chr3	23591794	23606794	ENSG00000182247.12	0	+
chr16	9121635	9146635	ENSG00000182831.13	0	+
chr12	132080460	132140460	ENSG00000183495.16	0	+
chr12	122626396	122656396	ENSG00000184445.12	0	+
chr12	132152473	132162473	ENSG00000184967.8	0	+
chr8	85284073	85299073	ENSG00000185015.8	0	+
chr15	78903078	78918078	ENSG00000185787.17	0	+
chr19	57447101	57457101	ENSG00000186230.7	0	+
chr19	57421934	57431934	ENSG00000186272.14	0	+
chrX	51408843	51493843	ENSG00000187690.4	0	+
chr8	38060365	38070365	ENSG00000187840.6	0	+
chr1	147993592	148013592	ENSG00000188092.16	0	+
chr19	37248740	37268740	ENSG00000188283.13	0	+
chr19	9351162	9386162	ENSG00000188321.15	0	+
chr7	64833681	64843681	ENSG00000197008.10	0	+
chr7	99632408	99672408	ENSG00000197037.12	0	+
chr12	53481162	53491162	ENSG00000197111.17	0	+
chr7	128092609	128102609	ENSG00000197157.12	0	+
chr5	178211183	178221183	ENSG00000197451.13	0	+
chr1	167791919	167801919	ENSG00000197965.13	0	+
chr13	113641509	113651509	ENSG00000198176.14	0	+
chr12	104350307	104360307	ENSG00000198431.18	0	+
chr19	57865117	57875117	ENSG00000198466.13	0	+
chr4	163520733	163545733	ENSG00000198498.11	0	+
chr2	237100474	237110474	ENSG00000198612.12	0	+
chr3	193697811	193707811	ENSG00000198836.12	0	+
chrX	102753540	102763540	ENSG00000198908.13	0	+
chr6	147737547	147892547	ENSG00000203727.4	0	+
chr1	52894998	52909998	ENSG00000203995.11	0	+
chrX	73687111	73697111	ENSG00000204116.12	0	+
chr19	57717301	57762301	ENSG00000204519.11	0	+
chr5	70078522	70088522	ENSG00000205571.16	0	+
chr1	168253021	168273021	ENSG00000213064.11	0	+
chr19	24129968	24144968	ENSG00000213096.11	0	+
chr9	120801787	120816787	ENSG00000214654.9	0	+
chr1	109096935	109106935	ENSG00000215717.8	0	+
chr7	102809552	102854552	ENSG00000222011.10	0	+
chr2	87636740	87656740	ENSG00000222041.13	0	+
chr17	81241310	81251310	ENSG00000224877.4	0	+
chr3	10294903	10314903	ENSG00000240288.8	0	+
chr12	57617245	57627245	ENSG00000240771.9	0	+
chr9	111670473	111765473	ENSG00000242616.5	0	+
chr3	112812819	112947819	ENSG00000242770.3	0	+
chr15	74516959	74536959	ENSG00000247240.11	0	+
chr2	197708395	197728395	ENSG00000247626.5	0	+
chr4	4821468	4851468	ENSG00000247708.9	0	+
chr5	77166909	77176909	ENSG00000250802.8	0	+
chr8	12202753	12237753	ENSG00000255052.6	0	+
chr3	101685669	101705669	ENSG00000256628.6	0	+
chr19	34229302	34239302	ENSG00000257103.10	0	+
chr19	47277755	47287755	ENSG00000257704.5	0	+
chr14	64944591	64964591	ENSG00000258289.11	0	+
chr15	51322480	51337480	ENSG00000259240.2	0	+
chr18	57738678	57753678	ENSG00000267040.9	0	+
chr9	112885767	112895767	ENSG00000271631.1	0	+
chr3	18041541	18316541	ENSG00000274840.6	0	+
chr15	30649529	30799529	ENSG00000285077.4	0	+
chr10	46815125	46840125	ENSG00000291069.2	0	+
chr9	92838458	92848458	ENSG00000291168.2	0	+
chr10	79923119	79933119	ENSG00000293431.1	0	+
chr4	415434	425434	ENSG00000293360.1	0	-
chr16	30260017	30285017	ENSG00000291266.2	0	-
chr16	70199481	70246777	ENSG00000223496.3	0	-
chr6	159654068	159669068	ENSG00000291237.2	0	-
chr17	64891424	64966424	ENSG00000291140.2	0	-
chr9	40870522	40900522	ENSG00000290923.2	0	-
chr9	96875845	96885845	ENSG00000290770.2	0	-
chr3	195944280	195959280	ENSG00000290763.2	0	-
chr7	102522132	102562132	ENSG00000285437.3	0	-
chr2	55537291	55547291	ENSG00000275052.6	0	-
chr20	62376294	62386294	ENSG00000273619.3	0	-
chr19	8353303	8368303	ENSG00000269386.7	0	-
chr19	58247269	58257269	ENSG00000268516.5	0	-
chr7	102622024	102665367	ENSG00000228049.8	0	-
chr1	145728867	145738867	ENSG00000265491.6	0	-
chr8	144252044	144262044	ENSG00000261236.9	0	-
chr14	30402074	30412074	ENSG00000257636.7	0	-
chr11	27036854	27046854	ENSG00000254560.7	0	-
chr14	24199614	24209614	ENSG00000254505.12	0	-
chr8	10744960	10764960	ENSG00000254093.10	0	-
chr8	47763107	47773107	ENSG00000253729.10	0	-
chr19	12515372	12525372	ENSG00000249709.8	0	-
chr21	32482966	32497966	ENSG00000242220.10	0	-
chr17	18665750	18680750	ENSG00000240445.6	0	-
chr17	15422263	15502263	ENSG00000175106.17	0	-
chrX	10837542	10847542	ENSG00000234129.11	0	-
chrX	73915434	73940434	ENSG00000230590.13	0	-
chrX	73800648	73820648	ENSG00000229807.15	0	-
chr2	27060469	27070469	ENSG00000228474.7	0	-
chr19	54426708	54436708	ENSG00000226696.9	0	-
chr19	36671594	36681594	ENSG00000225975.9	0	-
chr10	49434167	49454167	ENSG00000225830.17	0	-
chrX	103601075	103626075	ENSG00000224031.1	0	-
chr6	5087594	5102594	ENSG00000214113.12	0	-
chr22	38280690	38290690	ENSG00000213923.14	0	-
chr3	48663840	48673840	ENSG00000213672.9	0	-
chr15	72320923	72340923	ENSG00000213614.12	0	-
chr5	700354	710354	ENSG00000206077.15	0	-
chr16	28369396	28379396	ENSG00000205609.14	0	-
chr11	2934428	2944428	ENSG00000205531.15	0	-
chr12	111433484	111443484	ENSG00000204842.19	0	-
chr10	47491853	47501853	ENSG00000204172.12	0	-
chr22	42048333	42058333	ENSG00000198951.13	0	-
chr17	6568146	6578146	ENSG00000198920.11	0	-
chrX	119776496	119786496	ENSG00000198918.9	0	-
chr2	170980822	170990822	ENSG00000198586.15	0	-
chr20	3178733	3188733	ENSG00000198171.14	0	-
chr5	37066227	37106227	ENSG00000197603.17	0	-
chr8	94351959	94371959	ENSG00000197275.15	0	-
chr8	30558317	30578317	ENSG00000197265.10	0	-
chr6	34577287	34587287	ENSG00000196821.11	0	-
chr9	96780489	96815489	ENSG00000196597.14	0	-
chr1	117838484	117863484	ENSG00000196505.12	0	-
chr10	124609291	124619291	ENSG00000189319.15	0	-
chrX	100994345	101009345	ENSG00000188917.16	0	-
chr5	785604	795604	ENSG00000188818.13	0	-
chr9	137233583	137243583	ENSG00000188163.8	0	-
chr11	6730625	6765625	ENSG00000188124.4	0	-
chr8	53956551	53966551	ENSG00000187735.17	0	-
chrX	57073550	57118550	ENSG00000186787.11	0	-
chr17	1769484	1779484	ENSG00000186532.13	0	-
chr17	81529884	81539884	ENSG00000185504.18	0	-
chr10	74105254	74120254	ENSG00000185009.14	0	-
chr11	6781735	6791735	ENSG00000184933.6	0	-
chr6	169447210	169457210	ENSG00000184465.18	0	-
chr15	101566443	101621443	ENSG00000184277.14	0	-
chr2	19886630	19896630	ENSG00000183891.7	0	-
chr8	93713154	93728154	ENSG00000183808.13	0	-
chr17	81877834	81887834	ENSG00000183684.9	0	-
chr21	39164768	39174768	ENSG00000183527.13	0	-
chr10	123997667	124007667	ENSG00000182022.19	0	-
chr14	59359021	59429021	ENSG00000181619.12	0	-
chrX	14540387	14690387	ENSG00000181544.17	0	-
chr17	82379209	82389209	ENSG00000181396.14	0	-
chr17	202388	212388	ENSG00000181031.17	0	-
chr6	44092289	44112289	ENSG00000180992.8	0	-
chr22	27836668	27851668	ENSG00000180957.19	0	-
chr10	70192830	70202830	ENSG00000180817.13	0	-
chr8	449802	489802	ENSG00000180190.13	0	-
chr16	30408614	30423614	ENSG00000179958.10	0	-
chr17	734420	744420	ENSG00000179409.11	0	-
chr19	57783840	57803840	ENSG00000178935.5	0	-
chr15	74909790	74919790	ENSG00000178741.13	0	-
chr17	75308075	75318075	ENSG00000177885.16	0	-
chr12	79544978	79574978	ENSG00000177425.12	0	-
chr19	48701736	48711736	ENSG00000176909.13	0	-
chr7	73670917	73680917	ENSG00000176410.8	0	-
chr18	69988030	70003030	ENSG00000176225.16	0	-
chr3	154252545	154272545	ENSG00000174953.15	0	-
chr3	136123916	136148916	ENSG00000174579.5	0	-
chr2	95806918	95836918	ENSG00000174501.15	0	-
chr12	94266448	94306448	ENSG00000173588.17	0	-
chr19	57890295	57900295	ENSG00000173480.11	0	-
chr10	94318225	94333225	ENSG00000173145.12	0	-
chr4	83236535	83261535	ENSG00000173085.15	0	-
chr7	64494877	64519877	ENSG00000173041.13	0	-
chr3	129371320	129401320	ENSG00000172771.13	0	-
chr8	33355823	33370823	ENSG00000172728.17	0	-
chr10	45603374	45613374	ENSG00000172671.21	0	-
chr3	178950120	178960120	ENSG00000172667.12	0	-
chr17	30882335	30897335	ENSG00000172171.12	0	-
chr2	42422016	42442016	ENSG00000171126.8	0	-
chr2	28834792	28849792	ENSG00000171103.12	0	-
chr5	50381191	50396191	ENSG00000170571.13	0	-
chr15	33848781	33858781	ENSG00000169857.10	0	-
chr2	110626332	110636332	ENSG00000169679.16	0	-
chr15	75583082	75598082	ENSG00000169371.15	0	-
chr7	40106026	40126026	ENSG00000168303.9	0	-
chr17	41966420	41976420	ENSG00000168259.18	0	-
chr11	6801573	6891573	ENSG00000166368.3	0	-
chr15	49096067	49106067	ENSG00000166200.16	0	-
chr11	126182094	126202094	ENSG00000165526.10	0	-
chr8	124296188	124306188	ENSG00000164983.10	0	-
chr8	103373634	103398634	ENSG00000164933.13	0	-
chr7	21884973	21899973	ENSG00000164649.21	0	-
chr7	107186371	107201371	ENSG00000164597.16	0	-
chr4	3493611	3503611	ENSG00000163956.14	0	-
chr3	187110926	187120926	ENSG00000163923.11	0	-
chr3	128609967	128619967	ENSG00000163902.13	0	-
chr3	47485639	47495639	ENSG00000163832.17	0	-
chr3	108539863	108549863	ENSG00000163507.16	0	-
chr3	120309508	120324508	ENSG00000163428.5	0	-
chr1	151129747	151159747	ENSG00000163155.12	0	-
chr2	17648582	17663582	ENSG00000163029.17	0	-
chr2	151773983	151788983	ENSG00000162980.18	0	-
chr2	31840059	31865059	ENSG00000162959.15	0	-
chr1	77934054	77944054	ENSG00000162613.19	0	-
chr16	26406	46406	ENSG00000161980.7	0	-
chr17	44024327	44034327	ENSG00000161654.11	0	-
chr8	144491287	144511287	ENSG00000160957.16	0	-
chr19	40304535	40319535	ENSG00000160392.15	0	-
chr21	43752510	43772510	ENSG00000160213.11	0	-
chr21	42828012	42843012	ENSG00000160193.13	0	-
chr15	72741293	72751293	ENSG00000159322.19	0	-
chr21	32258223	32268223	ENSG00000159055.5	0	-
chr5	131388920	131423920	ENSG00000158987.23	0	-
chr3	138006986	138061986	ENSG00000158163.16	0	-
chr4	13136353	13361353	ENSG00000157869.17	0	-
chr7	140709326	140719326	ENSG00000157764.15	0	-
chr3	9827801	9837801	ENSG00000156990.15	0	-
chr15	73550002	73560002	ENSG00000156642.18	0	-
chr1	111105883	111115883	ENSG00000156171.16	0	-
chr9	74970789	74980789	ENSG00000156017.14	0	-
chr2	200963717	200973717	ENSG00000155744.11	0	-
chr1	112901846	112911846	ENSG00000155380.14	0	-
chr21	25540631	25585631	ENSG00000154719.15	0	-
chr3	33378335	33388335	ENSG00000153560.13	0	-
chr1	244820637	244840637	ENSG00000153187.22	0	-
chr13	27056149	27066149	ENSG00000152484.15	0	-
chr5	79362635	79372635	ENSG00000152413.16	0	-
chr11	107276600	107321600	ENSG00000152404.17	0	-
chr2	9478485	9488485	ENSG00000151694.16	0	-
chr10	77775777	77790777	ENSG00000151208.18	0	-
chr13	40545666	40555666	ENSG00000150907.11	0	-
chr5	10205506	10225506	ENSG00000150756.15	0	-
chr11	108135279	108155279	ENSG00000149308.19	0	-
chr11	47455932	47465932	ENSG00000149187.20	0	-
chr11	47149298	47164298	ENSG00000149182.16	0	-
chr11	57469063	57484063	ENSG00000149150.10	0	-
chr9	133396058	133406058	ENSG00000148300.13	0	-
chrX	136838003	136848003	ENSG00000147274.15	0	-
chr7	158598223	158628223	ENSG00000146918.21	0	-
chr7	12315200	12330200	ENSG00000146530.16	0	-
chr6	145844244	145864244	ENSG00000146414.18	0	-
chr6	87498458	87513458	ENSG00000146282.20	0	-
chr4	163100072	163110072	ENSG00000145414.10	0	-
chr4	67428761	67468761	ENSG00000145241.12	0	-
chr3	11546068	11556068	ENSG00000144560.16	0	-
chr3	11775441	11790441	ENSG00000144559.12	0	-
chr3	3590813	3700813	ENSG00000144455.15	0	-
chr2	73726781	73761781	ENSG00000144048.13	0	-
chr2	38551968	38561968	ENSG00000143889.16	0	-
chr1	150590850	150600850	ENSG00000143420.20	0	-
chr1	179089329	179099329	ENSG00000143322.22	0	-
chr1	156710795	156720795	ENSG00000143319.19	0	-
chr1	175919827	175944827	ENSG00000143207.22	0	-
chr1	67367809	67407809	ENSG00000142864.16	0	-
chr19	36309452	36334452	ENSG00000142065.15	0	-
chr17	16019064	16029064	ENSG00000141027.24	0	-
chr15	88469439	88494439	ENSG00000140543.16	0	-
chr15	77031403	77041403	ENSG00000140391.15	0	-
chr12	58862036	58872036	ENSG00000139263.13	0	-
chr12	31265583	31280583	ENSG00000139146.15	0	-
chr4	82341522	82351522	ENSG00000138668.21	0	-
chr10	73365100	73375100	ENSG00000138279.17	0	-
chr2	44306280	44316280	ENSG00000138078.17	0	-
chr11	78420619	78435619	ENSG00000137513.12	0	-
chr9	33911690	33921690	ENSG00000137073.25	0	-
chr9	97664908	97674908	ENSG00000136936.12	0	-
chr9	100267071	100302071	ENSG00000136891.15	0	-
chr9	111350684	111360684	ENSG00000136813.16	0	-
chr17	57970918	58000918	ENSG00000136450.13	0	-
chr15	79823584	79833584	ENSG00000136371.12	0	-
chr7	47951881	47961881	ENSG00000136273.15	0	-
chr1	180942711	180972711	ENSG00000135823.14	0	-
chr6	138883492	138903492	ENSG00000135597.20	0	-
chr6	109356513	109366513	ENSG00000135535.18	0	-
chr6	85497778	85607778	ENSG00000135316.20	0	-
chr9	85536538	85546538	ENSG00000135049.17	0	-
chr9	83627385	83657385	ENSG00000135018.15	0	-
chr2	9573966	9583966	ENSG00000134308.15	0	-
chr15	34125364	34140364	ENSG00000134152.12	0	-
chr14	70556256	70581256	ENSG00000133997.13	0	-
chr12	92030277	92140277	ENSG00000133639.6	0	-
chr13	45323470	45333470	ENSG00000133112.18	0	-
chr17	10662473	10672473	ENSG00000133028.13	0	-
chr13	19813481	19823481	ENSG00000132950.20	0	-
chr20	44486220	44496220	ENSG00000132824.15	0	-
chr1	71053250	71063250	ENSG00000132485.15	0	-
chr7	50434127	50444127	ENSG00000132436.14	0	-
chr17	4528896	4538896	ENSG00000132382.16	0	-
chr11	6515071	6595071	ENSG00000132275.12	0	-
chr15	101165726	101175726	ENSG00000131873.8	0	-
chr3	15525581	15560581	ENSG00000131373.16	0	-
chrX	75036047	75051047	ENSG00000131269.20	0	-
chr16	85661197	85676197	ENSG00000131153.10	0	-
chr6	149494494	149504494	ENSG00000131013.5	0	-
chr19	10123341	10133341	ENSG00000130816.18	0	-
chr19	47035908	47045908	ENSG00000130748.7	0	-
chr9	135922402	135932402	ENSG00000130560.10	0	-
chr2	239832449	239892449	ENSG00000130414.14	0	-
chr11	8351863	8391863	ENSG00000130413.17	0	-
chr6	158955083	158970083	ENSG00000130363.15	0	-
chr14	31436035	31446035	ENSG00000129480.14	0	-
chr1	25821912	25831912	ENSG00000127423.11	0	-
chrX	64905801	64915801	ENSG00000126970.17	0	-
chr14	55138109	55148109	ENSG00000126787.14	0	-
chr14	60633420	60643420	ENSG00000126778.13	0	-
chr13	113167535	113177535	ENSG00000126226.23	0	-
chr1	35584540	35599540	ENSG00000126067.13	0	-
chr1	23278770	23303770	ENSG00000125944.23	0	-
chrX	123590560	123600560	ENSG00000125676.21	0	-
chrX	119818807	119833807	ENSG00000125351.15	0	-
chr16	58504950	58519950	ENSG00000125107.20	0	-
chr5	65482765	65517765	ENSG00000123219.14	0	-
chr13	51910435	51930435	ENSG00000123191.19	0	-
chr12	113806737	113816737	ENSG00000122965.12	0	-
chr10	72995810	73005810	ENSG00000122884.14	0	-
chr10	73020154	73130154	ENSG00000122882.12	0	-
chr7	33004112	33014112	ENSG00000122643.25	0	-
chr1	90885297	90915297	ENSG00000122482.23	0	-
chr13	19659751	19674751	ENSG00000121390.20	0	-
chr12	101378115	101393115	ENSG00000120805.15	0	-
chr8	109195918	109240918	ENSG00000120526.13	0	-
chr9	121168132	121178132	ENSG00000119396.13	0	-
chr9	112200070	112215070	ENSG00000119314.18	0	-
chr1	236539004	236549004	ENSG00000119285.12	0	-
chr4	15594380	15604380	ENSG00000118564.16	0	-
chr15	80926288	80946288	ENSG00000117899.12	0	-
chr1	46030139	46040139	ENSG00000117461.16	0	-
chr1	44211069	44221069	ENSG00000117419.17	0	-
chr1	85604416	85649416	ENSG00000117174.12	0	-
chr1	119015283	119030283	ENSG00000116874.13	0	-
chr1	192987245	193012245	ENSG00000116750.15	0	-
chr1	66989349	66999349	ENSG00000116704.9	0	-
chr1	111429889	111439889	ENSG00000116455.14	0	-
chr1	29182656	29192656	ENSG00000116353.17	0	-
chr2	175057249	175072249	ENSG00000115966.19	0	-
chr2	42323545	42333545	ENSG00000115944.16	0	-
chr2	38733598	38743598	ENSG00000115875.20	0	-
chr2	99308981	99318981	ENSG00000115514.13	0	-
chr2	55277817	55287817	ENSG00000115355.19	0	-
chr2	96568169	96593169	ENSG00000114982.20	0	-
chr3	156524552	156539552	ENSG00000114850.8	0	-
chr3	131452201	131462201	ENSG00000114686.10	0	-
chr3	167668297	167683297	ENSG00000114209.16	0	-
chr15	25323727	25333727	ENSG00000114062.23	0	-
chr5	134128934	134148934	ENSG00000113558.20	0	-
chr5	32094711	32124711	ENSG00000113384.15	0	-
chr6	134950377	134960377	ENSG00000112339.16	0	-
chr6	110079816	110099816	ENSG00000112290.14	0	-
chr6	98853534	98868534	ENSG00000112234.10	0	-
chr6	118803441	118813441	ENSG00000111877.19	0	-
chr12	103760452	103770452	ENSG00000111696.13	0	-
chr12	10589189	10604189	ENSG00000111196.12	0	-
chr11	90185428	90200428	ENSG00000110172.13	0	-
chr11	47601696	47616696	ENSG00000109919.11	0	-
chr4	24507440	24517440	ENSG00000109606.14	0	-
chr17	50347856	50367856	ENSG00000108826.17	0	-
chr17	19894301	19904301	ENSG00000108599.16	0	-
chr10	796914	806914	ENSG00000107929.17	0	-
chr10	26948792	26973792	ENSG00000107890.18	0	-
chr10	117989915	118004915	ENSG00000107560.13	0	-
chr9	131566757	131576757	ENSG00000107263.20	0	-
chr7	128282684	128297684	ENSG00000106344.9	0	-
chr19	39815349	39825349	ENSG00000105204.14	0	-
chr16	87686484	87696484	ENSG00000104731.15	0	-
chr8	65592455	65602455	ENSG00000104442.11	0	-
chr15	48692927	48712927	ENSG00000103995.14	0	-
chr16	19691936	19701936	ENSG00000103550.15	0	-
chr13	95786579	95801579	ENSG00000102595.23	0	-
chr20	34260267	34280267	ENSG00000101444.13	0	-
chr20	33348436	33358436	ENSG00000101391.22	0	-
chr14	80446968	80476968	ENSG00000100629.18	0	-
chr14	53026744	53036744	ENSG00000100523.18	0	-
chr14	50093631	50108631	ENSG00000100483.15	0	-
chr22	39302869	39312869	ENSG00000100316.17	0	-
chr22	29495878	29505878	ENSG00000100296.15	0	-
chr22	42150012	42160012	ENSG00000100207.21	0	-
chr22	41663932	41673932	ENSG00000100138.15	0	-
chr22	21909424	21919424	ENSG00000100034.14	0	-
chr19	2410624	2425624	ENSG00000099800.9	0	-
chr14	21197374	21207374	ENSG00000092199.20	0	-
chr16	74437426	74447426	ENSG00000090863.13	0	-
chr20	13373890	13388890	ENSG00000089123.17	0	-
chr20	2471816	2481816	ENSG00000088876.14	0	-
chr20	1353976	1368976	ENSG00000088832.19	0	-
chr6	104708093	104728093	ENSG00000085382.13	0	-
chr1	53901573	53916573	ENSG00000081870.13	0	-
chr9	2670468	2720468	ENSG00000080608.11	0	-
chr18	46783217	46803217	ENSG00000078043.17	0	-
chr1	20791291	20806291	ENSG00000075151.24	0	-
chr15	66321190	66336190	ENSG00000075131.11	0	-
chr19	49325584	49340584	ENSG00000074219.15	0	-
chr3	185633129	185643129	ENSG00000073792.17	0	-
chr12	270056	280056	ENSG00000073614.13	0	-
chr19	43533305	43543305	ENSG00000073050.13	0	-
chr3	126427600	126437600	ENSG00000070476.16	0	-
chr12	12106024	12116024	ENSG00000070018.10	0	-
chr1	205697821	205712821	ENSG00000069275.14	0	-
chrX	49103395	49113395	ENSG00000068394.12	0	-
chr1	212348925	212363925	ENSG00000065600.14	0	-
chr16	75586867	75596867	ENSG00000065457.12	0	-
chr12	26894249	26904249	ENSG00000064102.16	0	-
chr12	96253241	96278241	ENSG00000059758.9	0	-
chr7	152114921	152134921	ENSG00000055609.21	0	-
chr1	19291990	19301990	ENSG00000053371.14	0	-
chr5	175671676	175916676	ENSG00000051596.11	0	-
chr3	121411425	121431425	ENSG00000051341.16	0	-
chr5	180223142	180233142	ENSG00000050748.19	0	-
chr1	244393493	244408493	ENSG00000035687.10	0	-
chr5	60576911	60596911	ENSG00000035499.14	0	-
chr2	3153924	3188924	ENSG00000032389.14	0	-
chr5	137922959	137937959	ENSG00000031003.12	0	-
chr6	155241133	155256133	ENSG00000029639.12	0	-
chr6	166892112	166922112	ENSG00000026297.18	0	-
chr11	94405569	94415569	ENSG00000020922.14	0	-
chr20	51986662	52051662	ENSG00000020256.21	0	-
chr17	43029291	43044291	ENSG00000012048.27	0	-
chr6	170520115	170535115	ENSG00000008018.10	0	-
chr16	178960	188960	ENSG00000007392.18	0	-
chr7	38712973	38722973	ENSG00000006715.17	0	-
chr12	47646248	47661248	ENSG00000005175.11	0	-
chr1	32992985	33007985	ENSG00000004455.19	0	-
chr7	92182497	92197497	ENSG00000001631.18	0	-

## Sheet: Ctrl_SERIPH2nd_2.dogs
chromosome	start	end	gene_id	unused_field	strand
chr7	141655244	141665244	ENSG00000006530.19	0	+
chr1	231355023	231365023	ENSG00000010072.17	0	+
chr17	32381885	32411885	ENSG00000010244.20	0	+
chr17	16045015	16055015	ENSG00000011295.17	0	+
chr14	60969965	60979965	ENSG00000020426.12	0	+
chr22	50524780	50534780	ENSG00000025770.20	0	+
chr12	95302799	95312799	ENSG00000028203.20	0	+
chr15	40732344	40742344	ENSG00000051180.18	0	+
chr6	1613897	1623897	ENSG00000054598.9	0	+
chr2	202303666	202318666	ENSG00000055044.12	0	+
chr6	149591748	149601748	ENSG00000055211.15	0	+
chr12	911452	926452	ENSG00000060237.20	0	+
chr10	68792377	68802377	ENSG00000060339.15	0	+
chr1	109600195	109610195	ENSG00000065135.13	0	+
chr1	15940456	15955456	ENSG00000065526.13	0	+
chr2	186511929	186521929	ENSG00000065548.20	0	+
chr1	42703805	42723805	ENSG00000065978.20	0	+
chr6	126203817	126338817	ENSG00000066651.21	0	+
chr11	612225	642225	ENSG00000070047.14	0	+
chr1	22101360	22131360	ENSG00000070831.19	0	+
chr4	5814305	5824305	ENSG00000072840.14	0	+
chr2	71437183	71447183	ENSG00000075292.21	0	+
chr14	103503831	103518831	ENSG00000075413.20	0	+
chr2	171750158	171775158	ENSG00000077380.17	0	+
chr4	40158252	40168252	ENSG00000078177.16	0	+
chr8	11839500	11849500	ENSG00000079459.15	0	+
chr2	151508013	151528013	ENSG00000080345.19	0	+
chr1	113685923	113695923	ENSG00000081026.20	0	+
chr17	48061545	48076545	ENSG00000082641.17	0	+
chr6	80351082	80426082	ENSG00000083123.16	0	+
chr13	73017823	73027823	ENSG00000083535.17	0	+
chrX	55758774	55788774	ENSG00000083750.14	0	+
chr1	40423326	40448326	ENSG00000084070.13	0	+
chr6	161117385	161137385	ENSG00000085511.21	0	+
chr1	46278482	46298482	ENSG00000085999.14	0	+
chr5	62629949	62639949	ENSG00000086200.18	0	+
chr19	54155708	54175708	ENSG00000088038.21	0	+
chr2	117832379	117842379	ENSG00000088205.14	0	+
chr20	31801805	31811805	ENSG00000088325.17	0	+
chr14	76254342	76274342	ENSG00000089916.19	0	+
chr14	96567118	96577118	ENSG00000090060.20	0	+
chr15	43868414	43903414	ENSG00000092470.13	0	+
chr17	76781449	76791449	ENSG00000092931.13	0	+
chr22	19520612	19530612	ENSG00000093009.12	0	+
chr3	38421348	38451348	ENSG00000093217.12	0	+
chrX	75304885	75329885	ENSG00000094841.15	0	+
chr9	105776629	105846629	ENSG00000095209.13	0	+
chr10	92031437	92041437	ENSG00000095564.16	0	+
chr9	130887675	130897675	ENSG00000097007.21	0	+
chr22	35425431	35470431	ENSG00000100297.17	0	+
chr14	96954846	97064846	ENSG00000100749.10	0	+
chr14	100282788	100292788	ENSG00000100811.15	0	+
chr20	5197887	5212887	ENSG00000101290.15	0	+
chr18	13125053	13135053	ENSG00000101639.20	0	+
chrX	111760649	111775649	ENSG00000101901.14	0	+
chrX	115650861	115660861	ENSG00000102024.20	0	+
chrX	102938300	102953300	ENSG00000102128.8	0	+
chrX	21994837	22009837	ENSG00000102172.17	0	+
chrX	76178755	76188755	ENSG00000102390.13	0	+
chr16	84779926	84789926	ENSG00000103194.17	0	+
chr16	682870	692870	ENSG00000103266.12	0	+
chr15	65891989	65921989	ENSG00000103769.11	0	+
chr15	44563029	44573029	ENSG00000104131.14	0	+
chr8	74518007	74528007	ENSG00000104381.15	0	+
chr8	15766649	15786649	ENSG00000104723.22	0	+
chr19	46021318	46036318	ENSG00000104983.9	0	+
chr19	30016612	30056612	ENSG00000105176.19	0	+
chr7	24694193	24724193	ENSG00000105926.17	0	+
chr9	5776557	5791557	ENSG00000107036.13	0	+
chr9	35758600	35778600	ENSG00000107185.11	0	+
chr10	130184521	130194521	ENSG00000108010.13	0	+
chr10	111017307	111027307	ENSG00000108061.14	0	+
chr17	58735611	58745611	ENSG00000108384.17	0	+
chr17	47949308	47964308	ENSG00000108439.12	0	+
chr4	41960803	41970803	ENSG00000109133.15	0	+
chr4	108632886	108642886	ENSG00000109475.19	0	+
chr4	177362936	177372936	ENSG00000109674.5	0	+
chr4	26756223	26776223	ENSG00000109680.12	0	+
chr11	63957319	63977319	ENSG00000110583.14	0	+
chr12	122062044	122152044	ENSG00000110987.10	0	+
chr12	69279829	69289829	ENSG00000111605.19	0	+
chr12	101744140	101754140	ENSG00000111666.12	0	+
chr6	36605911	36615911	ENSG00000112081.19	0	+
chr5	66082546	66097546	ENSG00000112851.17	0	+
chr5	667168	677168	ENSG00000112877.9	0	+
chr5	44820428	44840428	ENSG00000112996.12	0	+
chr5	80877147	80892147	ENSG00000113318.12	0	+
chr5	126837232	126902232	ENSG00000113368.13	0	+
chr5	33469531	33479531	ENSG00000113407.15	0	+
chr2	159232668	159242668	ENSG00000115183.16	0	+
chr2	74970128	75210128	ENSG00000115350.13	0	+
chr2	197553699	197573699	ENSG00000115540.16	0	+
chr1	32858879	32868879	ENSG00000116497.19	0	+
chr1	117107453	117117453	ENSG00000116830.13	0	+
chr1	231566524	231576524	ENSG00000116918.16	0	+
chr1	162601259	162611259	ENSG00000117143.15	0	+
chr1	145670980	145680980	ENSG00000117262.20	0	+
chr1	46369218	46384218	ENSG00000117481.13	0	+
chr1	93369493	93389493	ENSG00000117505.14	0	+
chr1	96823738	96833738	ENSG00000117569.21	0	+
chr4	17634105	17644105	ENSG00000118579.13	0	+
chr6	108684774	108709774	ENSG00000118689.16	0	+
chr13	75607472	75722472	ENSG00000118939.20	0	+
chr9	107332192	107342192	ENSG00000119318.14	0	+
chr2	32316594	32356594	ENSG00000119820.12	0	+
chr10	102229589	102244589	ENSG00000119915.5	0	+
chr10	99756187	99766187	ENSG00000119929.14	0	+
chr10	94613905	94623905	ENSG00000119969.17	0	+
chr9	4885917	4900917	ENSG00000120158.12	0	+
chr6	149811421	149821421	ENSG00000120265.22	0	+
chr4	153415118	153425118	ENSG00000121211.9	0	+
chr1	31365527	31375527	ENSG00000121766.17	0	+
chrX	129592561	129602561	ENSG00000122126.19	0	+
chr10	58289586	58299586	ENSG00000122873.13	0	+
chr1	50974634	51009634	ENSG00000123080.13	0	+
chr6	110895714	110905714	ENSG00000123505.21	0	+
chrX	13710504	13720504	ENSG00000123595.9	0	+
chr5	151492379	151517379	ENSG00000123643.15	0	+
chr20	58451101	58461101	ENSG00000124164.17	0	+
chr20	49097015	49107015	ENSG00000124207.18	0	+
chr6	2786952	2811952	ENSG00000124535.17	0	+
chrX	102604159	102709083	ENSG00000125962.17	0	+
chr19	36150356	36160356	ENSG00000126247.12	0	+
chr19	49626439	49636439	ENSG00000126464.15	0	+
chr17	30186475	30196475	ENSG00000126653.19	0	+
chr9	136929221	136944221	ENSG00000127191.20	0	+
chr12	69390870	69400870	ENSG00000127337.8	0	+
chr7	141791367	141816367	ENSG00000127366.5	0	+
chr7	131496632	131506632	ENSG00000128585.19	0	+
chr15	40394288	40404288	ENSG00000128944.14	0	+
chr7	56080670	56095670	ENSG00000129103.20	0	+
chr8	22006585	22016585	ENSG00000130227.18	0	+
chr19	5691881	5701881	ENSG00000130255.14	0	+
chr22	45845307	45865307	ENSG00000130638.18	0	+
chr17	67744531	67759531	ENSG00000130935.11	0	+
chr5	139628434	139638434	ENSG00000131508.18	0	+
chr1	147295767	147305767	ENSG00000131778.21	0	+
chr11	6484683	6534683	ENSG00000132286.13	0	+
chr13	36829104	36844104	ENSG00000133111.4	0	+
chr13	33966558	33986558	ENSG00000133119.14	0	+
chr19	1981339	1991339	ENSG00000133275.17	0	+
chr7	152855378	152900378	ENSG00000133627.19	0	+
chr1	116990358	117000358	ENSG00000134247.11	0	+
chr18	10552766	10562766	ENSG00000134265.14	0	+
chr1	193264613	193279613	ENSG00000134371.16	0	+
chr9	78330098	78355098	ENSG00000135069.15	0	+
chr11	34147670	34162670	ENSG00000135372.11	0	+
chr1	229660887	229670887	ENSG00000135763.11	0	+
chr2	218755416	218780416	ENSG00000135912.12	0	+
chr12	105169134	105199134	ENSG00000136051.16	0	+
chr7	6403998	6413998	ENSG00000136238.21	0	+
chr7	16706771	16716771	ENSG00000136261.17	0	+
chr17	49835026	49845026	ENSG00000136504.15	0	+
chr2	159771027	159781027	ENSG00000136536.16	0	+
chr10	17716824	17726824	ENSG00000136738.16	0	+
chr9	97673748	97683748	ENSG00000136937.14	0	+
chr9	37503701	37513701	ENSG00000137054.17	0	+
chr6	42939903	42949903	ENSG00000137161.19	0	+
chr2	24822376	24832376	ENSG00000138092.12	0	+
chr2	215349773	215369773	ENSG00000138363.16	0	+
chr2	202769757	202779757	ENSG00000138439.12	0	+
chr12	34029694	34039694	ENSG00000139133.7	0	+
chr14	51257655	51277655	ENSG00000139921.14	0	+
chr15	77485955	77505955	ENSG00000140382.16	0	+
chr15	89631056	89641056	ENSG00000140534.15	0	+
chr16	2603190	2623190	ENSG00000140992.21	0	+
chr17	68422731	68432731	ENSG00000141337.13	0	+
chr1	23696835	23761835	ENSG00000142676.15	0	+
chr1	43626579	43636579	ENSG00000142949.19	0	+
chr1	93139079	93154079	ENSG00000143033.19	0	+
chr1	165911618	165931618	ENSG00000143179.17	0	+
chr1	161363206	161373206	ENSG00000143252.18	0	+
chr1	219220700	219420700	ENSG00000143353.13	0	+
chr1	212107400	212147400	ENSG00000143476.19	0	+
chr1	246768137	246788137	ENSG00000143653.11	0	+
chr1	225790670	225805670	ENSG00000143742.15	0	+
chr2	138574458	138584458	ENSG00000144228.11	0	+
chr2	174430077	174440077	ENSG00000144306.16	0	+
chr2	173368997	173383997	ENSG00000144354.16	0	+
chr2	196763490	196773490	ENSG00000144395.18	0	+
chr2	231809254	231819254	ENSG00000144524.19	0	+
chr3	37366879	37376879	ENSG00000144674.20	0	+
chr3	49416476	49426476	ENSG00000145022.6	0	+
chr4	82461177	82471177	ENSG00000145293.18	0	+
chr5	1816051	1826051	ENSG00000145494.13	0	+
chr5	134831121	134841121	ENSG00000145833.17	0	+
chr5	151812911	151832911	ENSG00000145907.17	0	+
chr2	241225993	241235993	ENSG00000146205.16	0	+
chr1	35422058	35432058	ENSG00000146463.13	0	+
chr7	139425496	139435496	ENSG00000146963.19	0	+
chr8	41545030	41555030	ENSG00000147536.12	0	+
chr8	73048123	73068123	ENSG00000147601.16	0	+
chr10	133422520	133477520	ENSG00000148824.20	0	+
chr11	125676255	125686255	ENSG00000149554.16	0	+
chr10	112818744	112898744	ENSG00000151532.16	0	+
chr2	172608669	172633669	ENSG00000152256.15	0	+
chr10	14904315	14914315	ENSG00000152455.17	0	+
chr10	123170467	123540467	ENSG00000154473.19	0	+
chr3	12541549	12551549	ENSG00000154743.20	0	+
chr3	16350299	16375299	ENSG00000154814.15	0	+
chr8	91087095	91137095	ENSG00000155100.12	0	+
chr21	15880064	15895064	ENSG00000155313.17	0	+
chr5	154817605	154877605	ENSG00000155506.20	0	+
chr8	17302707	17312707	ENSG00000155975.11	0	+
chr21	29630751	29665751	ENSG00000156273.17	0	+
chrX	134428792	134438792	ENSG00000156531.19	0	+
chr6	38154624	38164624	ENSG00000156639.13	0	+
chr1	52348671	52358671	ENSG00000157077.17	0	+
chr3	12192032	12252032	ENSG00000157152.17	0	+
chr15	59125045	59155045	ENSG00000157456.9	0	+
chrX	110184260	110209260	ENSG00000157600.14	0	+
chr9	114646422	114656422	ENSG00000157693.16	0	+
chr15	42720998	42735998	ENSG00000159433.12	0	+
chr16	67929676	67949676	ENSG00000159792.10	0	+
chr1	1497848	1507848	ENSG00000160072.21	0	+
chr21	42913304	42923304	ENSG00000160194.19	0	+
chr21	43805757	43815757	ENSG00000160214.14	0	+
chr5	179777283	179787283	ENSG00000161021.14	0	+
chr2	60931612	60941612	ENSG00000162924.17	0	+
chr2	183163114	183263114	ENSG00000163002.14	0	+
chr2	108885477	108905477	ENSG00000163006.13	0	+
chr3	155944020	155969020	ENSG00000163655.17	0	+
chr3	57931461	57941461	ENSG00000163681.18	0	+
chr4	174333380	174343380	ENSG00000164118.14	0	+
chr5	5490220	5550220	ENSG00000164151.12	0	+
chr8	93819234	93829234	ENSG00000164953.17	0	+
chr9	112669397	112699397	ENSG00000165185.16	0	+
chr8	31176138	31186138	ENSG00000165392.12	0	+
chrX	134520513	134530513	ENSG00000165704.16	0	+
chr11	94876748	94906748	ENSG00000166025.19	0	+
chr10	100559998	100569998	ENSG00000166135.15	0	+
chr11	74842413	74877413	ENSG00000166439.7	0	+
chr17	39567559	39577559	ENSG00000167258.17	0	+
chr19	36238774	36253774	ENSG00000167635.13	0	+
chr19	4445018	4455018	ENSG00000167670.17	0	+
chr11	61446839	61476839	ENSG00000167985.9	0	+
chr6	57059041	57169041	ENSG00000168116.16	0	+
chr1	229305894	229330894	ENSG00000168118.13	0	+
chr3	9479240	9494240	ENSG00000168137.21	0	+
chr3	52295273	52315273	ENSG00000168237.19	0	+
chr3	158695836	158730836	ENSG00000168827.16	0	+
chr4	37863028	37873028	ENSG00000169299.15	0	+
chr15	78595269	78605269	ENSG00000169684.14	0	+
chr1	1311677	1321677	ENSG00000169972.14	0	+
chr3	44660791	44670791	ENSG00000169981.12	0	+
chr3	23891640	23901640	ENSG00000170142.13	0	+
chr17	15975746	15990746	ENSG00000170425.4	0	+
chr15	38487710	38507710	ENSG00000171262.11	0	+
chr2	10211725	10221725	ENSG00000171848.17	0	+
chr17	792509	807509	ENSG00000171861.12	0	+
chr5	70953942	70963942	ENSG00000172062.18	0	+
chr2	227561217	227571217	ENSG00000173744.19	0	+
chr11	66668380	66688380	ENSG00000173933.22	0	+
chr11	66606019	66616019	ENSG00000173992.10	0	+
chr1	241895148	241930148	ENSG00000174371.18	0	+
chr3	141148613	141163613	ENSG00000175093.6	0	+
chr11	66244744	66254744	ENSG00000175115.13	0	+
chr10	131959834	131979834	ENSG00000175470.21	0	+
chr15	84627796	84647796	ENSG00000176371.15	0	+
chr12	56479708	56494708	ENSG00000176422.14	0	+
chr9	137109189	137119189	ENSG00000177239.17	0	+
chr19	57330770	57340770	ENSG00000178229.9	0	+
chr12	50120457	50135457	ENSG00000178449.10	0	+
chr17	8270491	8280491	ENSG00000178921.15	0	+
chr11	36232138	36277138	ENSG00000179241.14	0	+
chr1	28539300	28549300	ENSG00000180198.18	0	+
chr7	30370457	30435457	ENSG00000180233.12	0	+
chr7	30162765	30202765	ENSG00000180354.17	0	+
chr15	64686068	64696068	ENSG00000180357.11	0	+
chr3	144048719	144158719	ENSG00000181744.9	0	+
chr1	228182257	228192257	ENSG00000181873.14	0	+
chr1	203871152	203881152	ENSG00000182004.14	0	+
chr3	23591794	23606794	ENSG00000182247.12	0	+
chr16	9121635	9146635	ENSG00000182831.13	0	+
chr12	132080460	132140460	ENSG00000183495.16	0	+
chr16	28735730	28745730	ENSG00000184110.16	0	+
chr12	122626396	122651396	ENSG00000184445.12	0	+
chr15	78903078	78923078	ENSG00000185787.17	0	+
chr19	57447101	57457101	ENSG00000186230.7	0	+
chr19	57421934	57431934	ENSG00000186272.14	0	+
chrX	51408843	51493843	ENSG00000187690.4	0	+
chr1	147993592	148013592	ENSG00000188092.16	0	+
chr19	9351162	9386162	ENSG00000188321.15	0	+
chr13	45284907	45294907	ENSG00000188342.14	0	+
chr7	64833681	64843681	ENSG00000197008.10	0	+
chr7	99632408	99652408	ENSG00000197037.12	0	+
chr12	53481162	53491162	ENSG00000197111.17	0	+
chr7	128092609	128102609	ENSG00000197157.12	0	+
chr5	178211183	178221183	ENSG00000197451.13	0	+
chr13	113641509	113651509	ENSG00000198176.14	0	+
chr12	104350307	104360307	ENSG00000198431.18	0	+
chr19	57865117	57875117	ENSG00000198466.13	0	+
chr1	28769784	28779784	ENSG00000198492.17	0	+
chr4	163520733	163540733	ENSG00000198498.11	0	+
chr2	237100474	237110474	ENSG00000198612.12	0	+
chr3	193697811	193707811	ENSG00000198836.12	0	+
chrX	102753540	102763540	ENSG00000198908.13	0	+
chr6	147737547	147912547	ENSG00000203727.4	0	+
chr6	126348875	126428875	ENSG00000203760.10	0	+
chr1	52894998	52904998	ENSG00000203995.11	0	+
chrX	73687111	73697111	ENSG00000204116.12	0	+
chr19	57717301	57742301	ENSG00000204519.11	0	+
chr5	70078522	70088522	ENSG00000205571.16	0	+
chr1	168253021	168273021	ENSG00000213064.11	0	+
chr19	24129968	24159968	ENSG00000213096.11	0	+
chr9	120801787	120816787	ENSG00000214654.9	0	+
chr1	109096935	109106935	ENSG00000215717.8	0	+
chr7	102809552	102854552	ENSG00000222011.10	0	+
chr2	87636740	87661740	ENSG00000222041.13	0	+
chr17	81241310	81251310	ENSG00000224877.4	0	+
chr3	10294903	10309903	ENSG00000240288.8	0	+
chr12	57617245	57627245	ENSG00000240771.9	0	+
chr9	111670473	111765473	ENSG00000242616.5	0	+
chr3	112812819	112947819	ENSG00000242770.3	0	+
chr15	74516959	74536959	ENSG00000247240.11	0	+
chr2	197708395	197743395	ENSG00000247626.5	0	+
chr4	4821468	4836468	ENSG00000247708.9	0	+
chr8	12202753	12237753	ENSG00000255052.6	0	+
chr3	101685669	101700669	ENSG00000256628.6	0	+
chr19	34229302	34239302	ENSG00000257103.10	0	+
chr19	47277755	47287755	ENSG00000257704.5	0	+
chr14	64944591	64969591	ENSG00000258289.11	0	+
chr15	51322480	51337480	ENSG00000259240.2	0	+
chr18	57738678	57753678	ENSG00000267040.9	0	+
chr3	18041541	18311541	ENSG00000274840.6	0	+
chr17	36608971	36628971	ENSG00000278619.6	0	+
chr15	30649529	30794529	ENSG00000285077.4	0	+
chr10	46815125	46840125	ENSG00000291069.2	0	+
chr9	92838458	92848458	ENSG00000291168.2	0	+
chr4	415434	425434	ENSG00000293360.1	0	-
chr16	30275017	30285017	ENSG00000291266.2	0	-
chr16	70199481	70246777	ENSG00000223496.3	0	-
chr6	159654068	159669068	ENSG00000291237.2	0	-
chr17	64891424	64966424	ENSG00000291140.2	0	-
chr9	40870522	40900522	ENSG00000290923.2	0	-
chr9	96875845	96885845	ENSG00000290770.2	0	-
chr7	102522918	102562132	ENSG00000285437.3	0	-
chr2	55537291	55547291	ENSG00000275052.6	0	-
chr20	62376294	62386294	ENSG00000273619.3	0	-
chr19	8348303	8368303	ENSG00000269386.7	0	-
chr19	58247269	58257269	ENSG00000268516.5	0	-
chr7	102622024	102665367	ENSG00000228049.8	0	-
chr1	145728867	145738867	ENSG00000265491.6	0	-
chr14	30402074	30412074	ENSG00000257636.7	0	-
chr14	24199614	24209614	ENSG00000254505.12	0	-
chr8	10744960	10764960	ENSG00000254093.10	0	-
chr8	90948083	90958083	ENSG00000253250.4	0	-
chr19	12515372	12525372	ENSG00000249709.8	0	-
chr17	18660750	18680750	ENSG00000240445.6	0	-
chr17	15426014	15502263	ENSG00000175106.17	0	-
chrX	10837542	10847542	ENSG00000234129.11	0	-
chr12	10814959	10824959	ENSG00000231887.10	0	-
chrX	73910434	73940434	ENSG00000230590.13	0	-
chrX	73800648	73820648	ENSG00000229807.15	0	-
chr5	80616225	80626225	ENSG00000228716.8	0	-
chr2	27060469	27070469	ENSG00000228474.7	0	-
chr19	54426708	54436708	ENSG00000226696.9	0	-
chr19	36671594	36681594	ENSG00000225975.9	0	-
chr10	49434167	49454167	ENSG00000225830.17	0	-
chrX	103601075	103626075	ENSG00000224031.1	0	-
chr2	68168856	68178856	ENSG00000221823.11	0	-
chr6	5087594	5102594	ENSG00000214113.12	0	-
chr20	35616030	35626030	ENSG00000214078.14	0	-
chr22	38280690	38290690	ENSG00000213923.14	0	-
chr3	48663840	48673840	ENSG00000213672.9	0	-
chr15	72320923	72340923	ENSG00000213614.12	0	-
chr16	28369396	28379396	ENSG00000205609.14	0	-
chr11	2934428	2944428	ENSG00000205531.15	0	-
chr12	111433484	111443484	ENSG00000204842.19	0	-
chr22	42048333	42058333	ENSG00000198951.13	0	-
chrX	119776496	119786496	ENSG00000198918.9	0	-
chr20	3178733	3188733	ENSG00000198171.14	0	-
chr5	37066227	37106227	ENSG00000197603.17	0	-
chr11	68876275	68891275	ENSG00000197345.14	0	-
chr8	94356959	94371959	ENSG00000197275.15	0	-
chr8	30558317	30578317	ENSG00000197265.10	0	-
chr2	196823003	196833003	ENSG00000197121.16	0	-
chr9	96780489	96815489	ENSG00000196597.14	0	-
chr1	117848484	117863484	ENSG00000196505.12	0	-
chr2	152641592	152651592	ENSG00000196504.22	0	-
chr19	37725832	37735832	ENSG00000189144.16	0	-
chr6	143412831	143422831	ENSG00000189007.17	0	-
chr4	42100852	42110852	ENSG00000188848.17	0	-
chr5	785604	795604	ENSG00000188818.13	0	-
chr9	137228583	137243583	ENSG00000188163.8	0	-
chr11	6730625	6765625	ENSG00000188124.4	0	-
chrX	57073550	57118550	ENSG00000186787.11	0	-
chr17	1769484	1779484	ENSG00000186532.13	0	-
chr17	81529884	81539884	ENSG00000185504.18	0	-
chr10	74110254	74120254	ENSG00000185009.14	0	-
chr11	6776735	6791735	ENSG00000184933.6	0	-
chr21	44753579	44768579	ENSG00000184787.20	0	-
chr6	169442210	169457210	ENSG00000184465.18	0	-
chr15	101576443	101621443	ENSG00000184277.14	0	-
chr8	93718154	93728154	ENSG00000183808.13	0	-
chr17	81877834	81887834	ENSG00000183684.9	0	-
chr21	39164768	39174768	ENSG00000183527.13	0	-
chr14	59354021	59429021	ENSG00000181619.12	0	-
chrX	14545387	14690387	ENSG00000181544.17	0	-
chr17	82379209	82389209	ENSG00000181396.14	0	-
chr6	44092289	44112289	ENSG00000180992.8	0	-
chr22	27836668	27851668	ENSG00000180957.19	0	-
chr10	70192830	70202830	ENSG00000180817.13	0	-
chr8	464802	489802	ENSG00000180190.13	0	-
chr16	30408614	30423614	ENSG00000179958.10	0	-
chr17	734420	744420	ENSG00000179409.11	0	-
chr19	57793840	57803840	ENSG00000178935.5	0	-
chr15	74909790	74919790	ENSG00000178741.13	0	-
chr17	75303075	75318075	ENSG00000177885.16	0	-
chr12	79544978	79574978	ENSG00000177425.12	0	-
chr19	48701736	48711736	ENSG00000176909.13	0	-
chr19	2923217	2933217	ENSG00000175691.10	0	-
chr3	154257545	154272545	ENSG00000174953.15	0	-
chr3	136113916	136148916	ENSG00000174579.5	0	-
chr2	95806918	95836918	ENSG00000174501.15	0	-
chr12	94271448	94306448	ENSG00000173588.17	0	-
chr19	57890295	57900295	ENSG00000173480.11	0	-
chr10	94318225	94333225	ENSG00000173145.12	0	-
chr4	83236535	83261535	ENSG00000173085.15	0	-
chr7	64494877	64519877	ENSG00000173041.13	0	-
chr3	129371320	129401320	ENSG00000172771.13	0	-
chr8	33360823	33370823	ENSG00000172728.17	0	-
chr10	45603374	45613374	ENSG00000172671.21	0	-
chr17	30882335	30897335	ENSG00000172171.12	0	-
chr2	42407016	42442016	ENSG00000171126.8	0	-
chr2	28824792	28849792	ENSG00000171103.12	0	-
chr15	33848781	33858781	ENSG00000169857.10	0	-
chr2	110626332	110636332	ENSG00000169679.16	0	-
chr15	75583082	75598082	ENSG00000169371.15	0	-
chr16	28087975	28097975	ENSG00000169180.13	0	-
chr7	40091026	40126026	ENSG00000168303.9	0	-
chr17	41966420	41976420	ENSG00000168259.18	0	-
chr11	6801573	6891573	ENSG00000166368.3	0	-
chr15	49096067	49106067	ENSG00000166200.16	0	-
chr11	126182094	126202094	ENSG00000165526.10	0	-
chr8	124296188	124306188	ENSG00000164983.10	0	-
chr8	103373634	103398634	ENSG00000164933.13	0	-
chr7	21884973	21899973	ENSG00000164649.21	0	-
chr7	107186371	107201371	ENSG00000164597.16	0	-
chr7	23494779	23504779	ENSG00000164548.13	0	-
chr3	47485639	47495639	ENSG00000163832.17	0	-
chr3	108539863	108549863	ENSG00000163507.16	0	-
chr1	151149747	151159747	ENSG00000163155.12	0	-
chr2	17653582	17663582	ENSG00000163029.17	0	-
chr2	151778983	151788983	ENSG00000162980.18	0	-
chr2	31840059	31865059	ENSG00000162959.15	0	-
chr1	77934054	77944054	ENSG00000162613.19	0	-
chr16	31406	46406	ENSG00000161980.7	0	-
chr17	44024327	44034327	ENSG00000161654.11	0	-
chr8	144496287	144511287	ENSG00000160957.16	0	-
chr19	40299535	40319535	ENSG00000160392.15	0	-
chr21	43757510	43772510	ENSG00000160213.11	0	-
chr21	42828012	42843012	ENSG00000160193.13	0	-
chr1	10446521	10456521	ENSG00000160049.13	0	-
chr5	131388920	131423920	ENSG00000158987.23	0	-
chr3	138006986	138061986	ENSG00000158163.16	0	-
chr4	13116353	13361353	ENSG00000157869.17	0	-
chr7	140709326	140719326	ENSG00000157764.15	0	-
chr3	9827801	9837801	ENSG00000156990.15	0	-
chr15	73550002	73560002	ENSG00000156642.18	0	-
chr1	111100883	111115883	ENSG00000156171.16	0	-
chr9	74970789	74980789	ENSG00000156017.14	0	-
chr2	200963717	200973717	ENSG00000155744.11	0	-
chr1	112901846	112911846	ENSG00000155380.14	0	-
chr21	25540631	25585631	ENSG00000154719.15	0	-
chr3	33378335	33388335	ENSG00000153560.13	0	-
chr1	244820637	244840637	ENSG00000153187.22	0	-
chr16	8842941	8852941	ENSG00000153048.12	0	-
chr4	22335070	22345070	ENSG00000152990.15	0	-
chr13	27051149	27066149	ENSG00000152484.15	0	-
chr5	79362635	79372635	ENSG00000152413.16	0	-
chr11	107276600	107321600	ENSG00000152404.17	0	-
chr2	9478485	9488485	ENSG00000151694.16	0	-
chr10	77780777	77790777	ENSG00000151208.18	0	-
chr13	40545666	40555666	ENSG00000150907.11	0	-
chr5	10195506	10225506	ENSG00000150756.15	0	-
chr11	108135279	108155279	ENSG00000149308.19	0	-
chr11	47154298	47164298	ENSG00000149182.16	0	-
chr11	57469063	57484063	ENSG00000149150.10	0	-
chr9	133396058	133406058	ENSG00000148300.13	0	-
chrX	136838003	136848003	ENSG00000147274.15	0	-
chr7	158598223	158628223	ENSG00000146918.21	0	-
chr7	130154712	130164712	ENSG00000146842.18	0	-
chr7	12310200	12330200	ENSG00000146530.16	0	-
chr6	145844244	145864244	ENSG00000146414.18	0	-
chr6	87493458	87513458	ENSG00000146282.20	0	-
chr4	163100072	163110072	ENSG00000145414.10	0	-
chr4	67433761	67468761	ENSG00000145241.12	0	-
chr3	11775441	11790441	ENSG00000144559.12	0	-
chr3	3640813	3700813	ENSG00000144455.15	0	-
chr2	73741781	73761781	ENSG00000144048.13	0	-
chr2	38546968	38561968	ENSG00000143889.16	0	-
chr1	223769892	223779892	ENSG00000143514.19	0	-
chr1	150590850	150600850	ENSG00000143420.20	0	-
chr1	179089329	179099329	ENSG00000143322.22	0	-
chr1	156710795	156720795	ENSG00000143319.19	0	-
chr1	175919827	175944827	ENSG00000143207.22	0	-
chr1	67387809	67407809	ENSG00000142864.16	0	-
chr19	36309452	36334452	ENSG00000142065.15	0	-
chr17	16019064	16029064	ENSG00000141027.24	0	-
chr15	84659528	84669528	ENSG00000140612.15	0	-
chr15	77031403	77041403	ENSG00000140391.15	0	-
chr12	31270583	31280583	ENSG00000139146.15	0	-
chr4	82341522	82351522	ENSG00000138668.21	0	-
chr10	73360100	73375100	ENSG00000138279.17	0	-
chr2	44306280	44316280	ENSG00000138078.17	0	-
chr11	78420619	78435619	ENSG00000137513.12	0	-
chr9	33911690	33921690	ENSG00000137073.25	0	-
chr9	97659908	97674908	ENSG00000136936.12	0	-
chr9	100277071	100302071	ENSG00000136891.15	0	-
chr17	57970918	58000918	ENSG00000136450.13	0	-
chr15	79818584	79833584	ENSG00000136371.12	0	-
chr7	47951881	47961881	ENSG00000136273.15	0	-
chr13	48043322	48053322	ENSG00000136146.16	0	-
chr1	180942711	180972711	ENSG00000135823.14	0	-
chr6	138888492	138903492	ENSG00000135597.20	0	-
chr6	109351513	109366513	ENSG00000135535.18	0	-
chr6	85502778	85607778	ENSG00000135316.20	0	-
chr7	105095703	105110703	ENSG00000135250.18	0	-
chr9	85536538	85546538	ENSG00000135049.17	0	-
chr9	83627385	83657385	ENSG00000135018.15	0	-
chr2	9573966	9583966	ENSG00000134308.15	0	-
chr15	34125364	34140364	ENSG00000134152.12	0	-
chr14	70556256	70581256	ENSG00000133997.13	0	-
chr12	92035277	92140277	ENSG00000133639.6	0	-
chr13	45323470	45333470	ENSG00000133112.18	0	-
chr17	10662473	10672473	ENSG00000133028.13	0	-
chr13	19813481	19823481	ENSG00000132950.20	0	-
chr20	44486220	44496220	ENSG00000132824.15	0	-
chr1	71053250	71063250	ENSG00000132485.15	0	-
chr7	50434127	50444127	ENSG00000132436.14	0	-
chr17	4528896	4538896	ENSG00000132382.16	0	-
chr11	6525071	6595071	ENSG00000132275.12	0	-
chr15	101165726	101175726	ENSG00000131873.8	0	-
chr3	15530581	15560581	ENSG00000131373.16	0	-
chr16	85661197	85676197	ENSG00000131153.10	0	-
chr6	149494494	149504494	ENSG00000131013.5	0	-
chr19	10123341	10133341	ENSG00000130816.18	0	-
chr19	47035908	47045908	ENSG00000130748.7	0	-
chr7	156984050	156994050	ENSG00000130675.15	0	-
chr9	135922402	135932402	ENSG00000130560.10	0	-
chr2	239832449	239892449	ENSG00000130414.14	0	-
chr11	8356863	8391863	ENSG00000130413.17	0	-
chr6	158955083	158970083	ENSG00000130363.15	0	-
chr14	31436035	31446035	ENSG00000129480.14	0	-
chr1	25821912	25831912	ENSG00000127423.11	0	-
chr14	63674215	63684215	ENSG00000126821.9	0	-
chr14	55138109	55148109	ENSG00000126787.14	0	-
chr14	60628420	60643420	ENSG00000126778.13	0	-
chr13	113167535	113177535	ENSG00000126226.23	0	-
chr1	35584540	35599540	ENSG00000126067.13	0	-
chr1	23278770	23303770	ENSG00000125944.23	0	-
chrX	123590560	123600560	ENSG00000125676.21	0	-
chrX	119813807	119833807	ENSG00000125351.15	0	-
chr16	58504950	58519950	ENSG00000125107.20	0	-
chr6	42996142	43011142	ENSG00000124733.5	0	-
chr6	34402446	34417446	ENSG00000124614.18	0	-
chr5	65482765	65517765	ENSG00000123219.14	0	-
chr13	51900435	51930435	ENSG00000123191.19	0	-
chr12	113806737	113816737	ENSG00000122965.12	0	-
chr10	72995810	73005810	ENSG00000122884.14	0	-
chr10	73020154	73130154	ENSG00000122882.12	0	-
chr7	33004112	33014112	ENSG00000122643.25	0	-
chr1	90890297	90915297	ENSG00000122482.23	0	-
chr13	19664751	19674751	ENSG00000121390.20	0	-
chr17	49588883	49598883	ENSG00000121067.20	0	-
chr12	101378115	101393115	ENSG00000120805.15	0	-
chr8	109200918	109240918	ENSG00000120526.13	0	-
chr2	23728663	23748663	ENSG00000119778.16	0	-
chr9	112200070	112215070	ENSG00000119314.18	0	-
chr1	236539004	236549004	ENSG00000119285.12	0	-
chr4	15584380	15604380	ENSG00000118564.16	0	-
chr15	80931288	80946288	ENSG00000117899.12	0	-
chr1	85614416	85649416	ENSG00000117174.12	0	-
chr1	119015283	119030283	ENSG00000116874.13	0	-
chr1	192987245	193012245	ENSG00000116750.15	0	-
chr1	66989349	66999349	ENSG00000116704.9	0	-
chr1	155325267	155335267	ENSG00000116539.14	0	-
chr1	111429889	111439889	ENSG00000116455.14	0	-
chr1	29182656	29192656	ENSG00000116353.17	0	-
chr2	175062249	175072249	ENSG00000115966.19	0	-
chr2	42323545	42333545	ENSG00000115944.16	0	-
chr2	38733598	38743598	ENSG00000115875.20	0	-
chr2	99308981	99318981	ENSG00000115514.13	0	-
chr2	55277817	55287817	ENSG00000115355.19	0	-
chr2	96578169	96593169	ENSG00000114982.20	0	-
chr3	156524552	156539552	ENSG00000114850.8	0	-
chr3	131452201	131462201	ENSG00000114686.10	0	-
chr3	167668297	167683297	ENSG00000114209.16	0	-
chr15	25323727	25333727	ENSG00000114062.23	0	-
chr5	134123934	134148934	ENSG00000113558.20	0	-
chr5	32094711	32124711	ENSG00000113384.15	0	-
chr6	110084816	110099816	ENSG00000112290.14	0	-
chr6	99532386	99542386	ENSG00000112237.14	0	-
chr6	98858534	98868534	ENSG00000112234.10	0	-
chr6	118803441	118813441	ENSG00000111877.19	0	-
chr12	103760452	103770452	ENSG00000111696.13	0	-
chr12	100018454	100028454	ENSG00000111647.14	0	-
chr12	112016688	112026688	ENSG00000111300.11	0	-
chr12	10589189	10604189	ENSG00000111196.12	0	-
chr11	90190428	90200428	ENSG00000110172.13	0	-
chr11	47606696	47616696	ENSG00000109919.11	0	-
chr4	24507440	24517440	ENSG00000109606.14	0	-
chr17	44839947	44849947	ENSG00000108883.14	0	-
chr17	50347856	50367856	ENSG00000108826.17	0	-
chr17	19894301	19904301	ENSG00000108599.16	0	-
chr10	791914	806914	ENSG00000107929.17	0	-
chr10	26948792	26973792	ENSG00000107890.18	0	-
chr10	117989915	118004915	ENSG00000107560.13	0	-
chr9	131566757	131576757	ENSG00000107263.20	0	-
chr9	136852114	136862114	ENSG00000107223.14	0	-
chr7	128282684	128297684	ENSG00000106344.9	0	-
chr19	39815349	39825349	ENSG00000105204.14	0	-
chr16	87686484	87696484	ENSG00000104731.15	0	-
chr8	65592455	65602455	ENSG00000104442.11	0	-
chr15	41299267	41309267	ENSG00000104147.10	0	-
chr15	48702927	48712927	ENSG00000103995.14	0	-
chr13	95791579	95801579	ENSG00000102595.23	0	-
chr20	34255267	34280267	ENSG00000101444.13	0	-
chr20	33348436	33358436	ENSG00000101391.22	0	-
chr14	80446968	80476968	ENSG00000100629.18	0	-
chr14	53026744	53036744	ENSG00000100523.18	0	-
chr22	39302869	39312869	ENSG00000100316.17	0	-
chr22	29495878	29505878	ENSG00000100296.15	0	-
chr22	42150012	42160012	ENSG00000100207.21	0	-
chr19	2410624	2425624	ENSG00000099800.9	0	-
chr14	21197374	21207374	ENSG00000092199.20	0	-
chr16	74437426	74447426	ENSG00000090863.13	0	-
chr20	13378890	13388890	ENSG00000089123.17	0	-
chr20	2471816	2481816	ENSG00000088876.14	0	-
chr20	1358976	1368976	ENSG00000088832.19	0	-
chr6	104708093	104728093	ENSG00000085382.13	0	-
chr9	2675468	2720468	ENSG00000080608.11	0	-
chr18	46788217	46803217	ENSG00000078043.17	0	-
chr1	20791291	20806291	ENSG00000075151.24	0	-
chr15	66321190	66336190	ENSG00000075131.11	0	-
chr19	49325584	49340584	ENSG00000074219.15	0	-
chr3	185633129	185643129	ENSG00000073792.17	0	-
chr12	270056	280056	ENSG00000073614.13	0	-
chr19	43533305	43543305	ENSG00000073050.13	0	-
chr3	126427600	126437600	ENSG00000070476.16	0	-
chr12	12106024	12116024	ENSG00000070018.10	0	-
chr1	205697821	205712821	ENSG00000069275.14	0	-
chr1	212348925	212363925	ENSG00000065600.14	0	-
chr16	75586867	75596867	ENSG00000065457.12	0	-
chr12	26894249	26904249	ENSG00000064102.16	0	-
chr12	96253241	96278241	ENSG00000059758.9	0	-
chr7	152114921	152134921	ENSG00000055609.21	0	-
chr1	19291990	19301990	ENSG00000053371.14	0	-
chr5	175656676	175916676	ENSG00000051596.11	0	-
chr3	121406425	121431425	ENSG00000051341.16	0	-
chr5	180223142	180233142	ENSG00000050748.19	0	-
chr6	42196693	42206693	ENSG00000048544.8	0	-
chr1	244393493	244408493	ENSG00000035687.10	0	-
chr5	137922959	137937959	ENSG00000031003.12	0	-
chr6	155241133	155256133	ENSG00000029639.12	0	-
chr6	166907112	166922112	ENSG00000026297.18	0	-
chr11	94405569	94415569	ENSG00000020922.14	0	-
chr20	51976662	52051662	ENSG00000020256.21	0	-
chr10	99700867	99710867	ENSG00000014919.14	0	-
chr17	43034291	43044291	ENSG00000012048.27	0	-
chr7	5610046	5620046	ENSG00000011275.19	0	-
chr6	170520115	170535115	ENSG00000008018.10	0	-
chr16	178960	188960	ENSG00000007392.18	0	-
chr12	47646248	47661248	ENSG00000005175.11	0	-
chr1	32992985	33007985	ENSG00000004455.19	0	-
chr7	92182497	92197497	ENSG00000001631.18	0	-

## Sheet: OSCHX_Conv_1.dogs
chromosome	start	end	gene_id	unused_field	strand
chr6	16151367	16181367	ENSG00000007944.16	0	+
chr1	231355023	231370023	ENSG00000010072.17	0	+
chr17	32381885	32436885	ENSG00000010244.20	0	+
chr1	23762059	23777059	ENSG00000011007.14	0	+
chr10	124988189	125003189	ENSG00000019995.6	0	+
chr1	109238773	109248773	ENSG00000031698.14	0	+
chr13	99986765	99996765	ENSG00000043355.12	0	+
chr1	19260128	19280128	ENSG00000053372.6	0	+
chr6	1613897	1653897	ENSG00000054598.9	0	+
chr2	101024032	101059032	ENSG00000071082.12	0	+
chr7	120977216	121067216	ENSG00000071243.17	0	+
chr4	5814305	5829305	ENSG00000072840.14	0	+
chr17	28750956	28815956	ENSG00000076604.16	0	+
chr2	216206303	216221303	ENSG00000079246.17	0	+
chr1	113685923	113695923	ENSG00000081026.20	0	+
chr9	33039916	33049916	ENSG00000086061.17	0	+
chr2	117832379	117842379	ENSG00000088205.14	0	+
chr17	76781449	76791449	ENSG00000092931.13	0	+
chr14	69773904	69828904	ENSG00000100650.17	0	+
chr14	103345025	103365025	ENSG00000100664.11	0	+
chr14	23645639	23655639	ENSG00000100867.16	0	+
chr14	39183220	39193220	ENSG00000100941.10	0	+
chrX	76178755	76193755	ENSG00000102390.13	0	+
chr16	682870	692870	ENSG00000103266.12	0	+
chr16	14669237	14679237	ENSG00000103429.12	0	+
chr16	30776307	30786307	ENSG00000103549.23	0	+
chr8	85481493	85496493	ENSG00000104267.11	0	+
chr8	30183639	30198639	ENSG00000104671.9	0	+
chr7	107202529	107232529	ENSG00000105856.15	0	+
chr9	79726882	79736882	ENSG00000106829.22	0	+
chr10	111017307	111037307	ENSG00000108061.14	0	+
chr10	58399220	58409220	ENSG00000108064.12	0	+
chr17	59950574	59960574	ENSG00000108443.15	0	+
chr17	50756219	50771219	ENSG00000108848.16	0	+
chr17	74839753	74854753	ENSG00000109066.15	0	+
chr4	177362936	177372936	ENSG00000109674.5	0	+
chr4	17844865	17874865	ENSG00000109805.11	0	+
chr12	118033545	118048545	ENSG00000111445.15	0	+
chr6	36605911	36675911	ENSG00000112081.19	0	+
chr6	63583588	63593588	ENSG00000112245.14	0	+
chr6	132817577	133022577	ENSG00000112306.9	0	+
chr6	133532128	133552128	ENSG00000112319.22	0	+
chr6	41933050	41948050	ENSG00000112578.12	0	+
chr5	667168	687168	ENSG00000112877.9	0	+
chr5	44820428	44830428	ENSG00000112996.12	0	+
chr5	80877147	80887147	ENSG00000113318.12	0	+
chr5	32604507	32614507	ENSG00000113387.14	0	+
chr3	160434965	160464965	ENSG00000113810.17	0	+
chr2	190965552	191000552	ENSG00000115419.15	0	+
chr1	93369493	93384493	ENSG00000117505.14	0	+
chr9	124353307	124363307	ENSG00000119408.18	0	+
chr6	149811421	149831421	ENSG00000120265.22	0	+
chr5	138469303	138479303	ENSG00000120738.8	0	+
chr13	27259609	27274609	ENSG00000122026.13	0	+
chr1	50974634	50984634	ENSG00000123080.13	0	+
chr12	50821162	50831162	ENSG00000123268.10	0	+
chr6	110895714	110930714	ENSG00000123505.21	0	+
chr20	43466046	43486046	ENSG00000124193.17	0	+
chr6	27893891	27998891	ENSG00000274641.2	0	+
chr6	36687397	36697397	ENSG00000124762.16	0	+
chr4	2732573	2747573	ENSG00000125386.17	0	+
chr11	64119173	64129173	ENSG00000126500.6	0	+
chr9	131234667	131244667	ENSG00000126883.20	0	+
chr22	39522690	39532690	ENSG00000128272.20	0	+
chr19	5691881	5716881	ENSG00000130255.14	0	+
chr1	28282491	28292491	ENSG00000130766.6	0	+
chr12	122862961	122872961	ENSG00000130787.15	0	+
chrX	153696591	153711591	ENSG00000130821.18	0	+
chr2	86142157	86157157	ENSG00000132300.20	0	+
chr17	7312466	7332466	ENSG00000132507.19	0	+
chr17	17217679	17232679	ENSG00000133030.23	0	+
chr11	10507877	10746435	ENSG00000133805.17	0	+
chr11	125090516	125130516	ENSG00000134955.13	0	+
chr7	87196337	87206337	ENSG00000135164.20	0	+
chr1	229660887	229670887	ENSG00000135763.11	0	+
chr1	182887982	182897982	ENSG00000135829.18	0	+
chr2	159771027	159781027	ENSG00000136536.16	0	+
chr10	17716824	17726824	ENSG00000136738.16	0	+
chr9	113264492	113274492	ENSG00000136868.12	0	+
chr9	37503701	37518701	ENSG00000137054.17	0	+
chr11	83260694	83270694	ENSG00000137494.15	0	+
chr2	24822376	24832376	ENSG00000138092.12	0	+
chr10	110511541	110551541	ENSG00000138166.7	0	+
chr10	68694586	68704586	ENSG00000138336.10	0	+
chr3	122881139	122891139	ENSG00000138463.10	0	+
chr12	34029694	34039694	ENSG00000139133.7	0	+
chr12	103988874	104008874	ENSG00000139372.15	0	+
chr12	109770495	109785495	ENSG00000139438.7	0	+
chr13	77764242	77774242	ENSG00000139737.23	0	+
chr15	22869362	22884362	ENSG00000140157.17	0	+
chr15	72742006	72782006	ENSG00000140463.16	0	+
chr15	89631056	89641056	ENSG00000140534.15	0	+
chr16	87405090	87455090	ENSG00000140941.15	0	+
chr16	2603190	2613190	ENSG00000140992.21	0	+
chr1	165911618	165926618	ENSG00000143179.17	0	+
chr1	161363206	161373206	ENSG00000143252.18	0	+
chr1	179920077	179940077	ENSG00000143337.19	0	+
chr1	183928532	183938532	ENSG00000143344.17	0	+
chr1	228099212	228114212	ENSG00000143761.18	0	+
chr4	151104652	151149652	ENSG00000145425.11	0	+
chr5	151812911	151867911	ENSG00000145907.17	0	+
chr5	181235808	181245808	ENSG00000146063.21	0	+
chr2	241225993	241245993	ENSG00000146205.16	0	+
chr6	89085160	89145160	ENSG00000146278.11	0	+
chr7	28825894	28940894	ENSG00000146592.18	0	+
chr7	65401136	65411136	ENSG00000146757.14	0	+
chrX	45112779	45127779	ENSG00000147050.19	0	+
chr8	73048123	73068123	ENSG00000147601.16	0	+
chr9	133362215	133377215	ENSG00000148291.11	0	+
chr11	43857741	43867741	ENSG00000149084.14	0	+
chr11	75422280	75462280	ENSG00000149273.16	0	+
chr10	110900006	110965006	ENSG00000150593.19	0	+
chr10	112818744	112828744	ENSG00000151532.16	0	+
chr10	132205762	132220762	ENSG00000151640.14	0	+
chr10	14904315	14949315	ENSG00000152455.17	0	+
chr10	89421605	89431605	ENSG00000152778.10	0	+
chr4	41268560	41278560	ENSG00000154277.14	0	+
chr10	123170467	123180467	ENSG00000154473.19	0	+
chr6	110968586	110978586	ENSG00000155115.8	0	+
chr11	76553031	76573031	ENSG00000158636.18	0	+
chr16	89740925	89805925	ENSG00000158805.13	0	+
chr1	153646306	153656306	ENSG00000160679.14	0	+
chr5	179838078	179858078	ENSG00000161011.21	0	+
chr1	28719353	28734353	ENSG00000162419.14	0	+
chr2	60931612	60941612	ENSG00000162924.17	0	+
chr17	76714384	76724384	ENSG00000163597.18	0	+
chr3	156706770	156751770	ENSG00000163659.14	0	+
chr1	42852477	42862477	ENSG00000164011.19	0	+
chr4	145129524	145149524	ENSG00000164163.12	0	+
chr8	103443579	103453579	ENSG00000164934.16	0	+
chr9	136427992	136442992	ENSG00000165688.15	0	+
chr11	8714759	8754759	ENSG00000166441.14	0	+
chr16	88809258	88819258	ENSG00000167513.10	0	+
chr19	4445018	4455018	ENSG00000167670.17	0	+
chr19	8374371	8394371	ENSG00000167772.13	0	+
chr3	39426255	39466255	ENSG00000168028.16	0	+
chr1	229305894	229315894	ENSG00000168118.13	0	+
chr4	26435131	26450131	ENSG00000168214.23	0	+
chr3	39529479	39559479	ENSG00000168314.20	0	+
chr2	85545281	85560281	ENSG00000168906.14	0	+
chr4	37863028	37873028	ENSG00000169299.15	0	+
chr16	31332892	31347892	ENSG00000169896.19	0	+
chr1	1311677	1321677	ENSG00000169972.14	0	+
chr3	44660791	44670791	ENSG00000169981.12	0	+
chr2	177226106	177266106	ENSG00000170144.24	0	+
chr4	143225212	143265212	ENSG00000170185.13	0	+
chr10	60796236	60811236	ENSG00000170312.18	0	+
chr4	6676755	6691755	ENSG00000170846.17	0	+
chr2	10211725	10221725	ENSG00000171848.17	0	+
chr17	792509	802509	ENSG00000171861.12	0	+
chr11	66668380	66678380	ENSG00000173933.22	0	+
chr3	23924374	23934374	ENSG00000174748.23	0	+
chr17	16480249	16495249	ENSG00000175061.21	0	+
chr17	43401137	43411137	ENSG00000175906.6	0	+
chr3	49023495	49033495	ENSG00000178057.16	0	+
chr19	57330770	57340770	ENSG00000178229.9	0	+
chr2	17788946	17798946	ENSG00000178295.16	0	+
chr17	8270491	8280491	ENSG00000178921.15	0	+
chr1	28578545	28588545	ENSG00000180098.10	0	+
chr1	28539300	28549300	ENSG00000180198.18	0	+
chr6	26139116	26154116	ENSG00000180573.10	0	+
chr7	112491062	112521062	ENSG00000181016.10	0	+
chr1	117628389	117693389	ENSG00000183508.6	0	+
chr8	37700019	37770019	ENSG00000183779.7	0	+
chr11	2403878	2418878	ENSG00000184281.16	0	+
chrX	155123077	155133077	ENSG00000185515.16	0	+
chr15	78903078	78913078	ENSG00000185787.17	0	+
chr17	15720787	15730787	ENSG00000187607.17	0	+
chr9	89363633	89428633	ENSG00000187742.16	0	+
chr10	38065088	38075088	ENSG00000189180.17	0	+
chr7	44824564	44834564	ENSG00000196262.16	0	+
chr1	228463104	228478104	ENSG00000196890.5	0	+
chr12	53481162	53511162	ENSG00000197111.17	0	+
chr6	28089563	28099563	ENSG00000197279.6	0	+
chr5	178211183	178256183	ENSG00000197451.13	0	+
chr6	111028263	111038263	ENSG00000197498.14	0	+
chr2	216579180	216589180	ENSG00000197756.11	0	+
chr6	35470785	35495785	ENSG00000198755.12	0	+
chr2	104858574	104873574	ENSG00000198914.5	0	+
chr1	52894998	52904998	ENSG00000203995.11	0	+
chr6	32981505	33001505	ENSG00000204256.16	0	+
chr8	80526265	80546265	ENSG00000205189.14	0	+
chr5	112164818	112184818	ENSG00000224032.10	0	+
chr11	58625733	58660733	ENSG00000242689.3	0	+
chr5	140549576	140564576	ENSG00000243056.2	0	+
chr3	128539314	128549314	ENSG00000244300.4	0	+
chr4	102844111	102854111	ENSG00000246560.4	0	+
chr11	8810276	8820276	ENSG00000255159.2	0	+
chr17	58171411	58191411	ENSG00000255713.2	0	+
chr12	53517608	53527608	ENSG00000257550.2	0	+
chr3	51397908	51412908	ENSG00000259956.2	0	+
chr1	149839767	149849767	ENSG00000270882.3	0	+
chr7	29013370	29033370	ENSG00000272568.7	0	+
chr6	26184655	26194655	ENSG00000274290.3	0	+
chr6	26227473	26237473	ENSG00000274750.4	0	+
chr6	26252075	26272075	ENSG00000275713.3	0	+
chr6	26205021	26215021	ENSG00000276966.3	0	+
chr4	415434	425434	ENSG00000293360.1	0	-
chr6	31449917	31530217	ENSG00000198563.15	0	-
chr5	36854424	36864424	ENSG00000285967.2	0	-
chr16	75704130	75714130	ENSG00000283755.2	0	-
chr6	26125764	26188709	ENSG00000277157.2	0	-
chr16	75678892	75693892	ENSG00000282757.4	0	-
chr6	26201199	26216199	ENSG00000273802.3	0	-
chr1	149844044	149854044	ENSG00000270276.3	0	-
chr11	2582307	2597307	ENSG00000269821.2	0	-
chr19	49823638	49838638	ENSG00000268006.2	0	-
chr9	136312302	136322302	ENSG00000262075.4	0	-
chr17	64309414	64319414	ENSG00000261371.7	0	-
chr20	36027279	36042279	ENSG00000260032.3	0	-
chr14	30402074	30412074	ENSG00000257636.7	0	-
chr4	99621528	99636528	ENSG00000248713.2	0	-
chr17	15426014	15436014	ENSG00000239704.13	0	-
chr3	127268782	127283782	ENSG00000239620.3	0	-
chr7	104804627	104894627	ENSG00000239569.6	0	-
chr16	29788635	29808635	ENSG00000238045.10	0	-
chr1	77871347	77881347	ENSG00000235927.4	0	-
chr1	173836423	173851423	ENSG00000234741.11	0	-
chrX	73775648	73820648	ENSG00000229807.15	0	-
chr7	104723596	104738596	ENSG00000226869.6	0	-
chr8	12122416	12132416	ENSG00000226430.7	0	-
chr10	49434167	49454167	ENSG00000225830.17	0	-
chr6	157279024	157289024	ENSG00000215712.12	0	-
chr16	69310139	69320139	ENSG00000213380.16	0	-
chr13	72698366	72708366	ENSG00000204899.6	0	-
chr5	181221896	181236896	ENSG00000204628.13	0	-
chr6	30575399	30600399	ENSG00000204569.11	0	-
chr6	31942086	31952086	ENSG00000204356.15	0	-
chr1	149752688	149782688	ENSG00000203814.7	0	-
chr22	42048333	42058333	ENSG00000198951.13	0	-
chr9	137289630	137299630	ENSG00000198435.4	0	-
chr4	87326514	87336514	ENSG00000198189.12	0	-
chr8	144705514	144720514	ENSG00000198169.10	0	-
chrX	72240678	72255678	ENSG00000198034.12	0	-
chr5	37096227	37106227	ENSG00000197603.17	0	-
chr6	113923027	113933027	ENSG00000196591.13	0	-
chr1	117838484	117863484	ENSG00000196505.12	0	-
chr2	152591592	152651592	ENSG00000196504.22	0	-
chr6	116247759	116267759	ENSG00000189241.8	0	-
chr19	37725832	37735832	ENSG00000189144.16	0	-
chr1	23954346	23964346	ENSG00000188529.16	0	-
chr1	983961	998961	ENSG00000188290.12	0	-
chr17	78408696	78423696	ENSG00000187775.17	0	-
chr8	100484751	100509751	ENSG00000186106.12	0	-
chr4	1967716	1982716	ENSG00000185049.17	0	-
chr22	20979103	20999103	ENSG00000184436.13	0	-
chr17	81499412	81509412	ENSG00000184009.14	0	-
chr2	19886630	19896630	ENSG00000183891.7	0	-
chr8	93703154	93728154	ENSG00000183808.13	0	-
chr17	81877834	81887834	ENSG00000183684.9	0	-
chrX	14680387	14690387	ENSG00000181544.17	0	-
chr10	97317496	97332496	ENSG00000181274.7	0	-
chr6	44092289	44112289	ENSG00000180992.8	0	-
chr17	57851242	57861242	ENSG00000180891.14	0	-
chr8	22672658	22687658	ENSG00000179388.9	0	-
chr3	128469422	128479422	ENSG00000179348.14	0	-
chr13	76860174	76880174	ENSG00000178695.6	0	-
chr3	49005487	49015487	ENSG00000178149.18	0	-
chr10	51685485	51695485	ENSG00000177613.9	0	-
chr18	49467242	49477242	ENSG00000177576.13	0	-
chr9	137085539	137110539	ENSG00000176978.17	0	-
chr11	33057187	33077187	ENSG00000176102.14	0	-
chr3	49696828	49716828	ENSG00000176020.9	0	-
chr1	32323826	32333826	ENSG00000175130.8	0	-
chr2	95811918	95836918	ENSG00000174501.15	0	-
chr15	65648045	65658045	ENSG00000174485.17	0	-
chr15	66460134	66490134	ENSG00000174446.13	0	-
chr8	100527881	100572881	ENSG00000174226.10	0	-
chr5	16431517	16451517	ENSG00000173545.6	0	-
chr21	41971830	41986830	ENSG00000173276.15	0	-
chr8	33360823	33370823	ENSG00000172728.17	0	-
chr3	178950120	178960120	ENSG00000172667.12	0	-
chr7	25018655	25118655	ENSG00000172115.10	0	-
chr5	1788380	1798380	ENSG00000171421.14	0	-
chr7	32848165	32868165	ENSG00000170852.13	0	-
chr17	82025135	82035135	ENSG00000169738.9	0	-
chr15	75583082	75598082	ENSG00000169371.15	0	-
chr6	3712613	3722613	ENSG00000168994.14	0	-
chr1	234582299	234602299	ENSG00000168264.13	0	-
chr16	2224401	2239401	ENSG00000167969.14	0	-
chr17	2307391	2322391	ENSG00000167721.12	0	-
chr12	49751139	49791139	ENSG00000167566.18	0	-
chr17	57699494	57744494	ENSG00000166329.3	0	-
chr11	93714947	93729947	ENSG00000166012.18	0	-
chr10	117267273	117277273	ENSG00000165650.13	0	-
chr9	83923310	83938310	ENSG00000165118.15	0	-
chr8	103388634	103398634	ENSG00000164933.13	0	-
chr8	100881522	100916522	ENSG00000164924.19	0	-
chr7	21884973	21899973	ENSG00000164649.21	0	-
chr4	173301375	173331375	ENSG00000164104.13	0	-
chr3	134055302	134065302	ENSG00000163785.15	0	-
chr4	39426746	39451746	ENSG00000163682.18	0	-
chr3	108539863	108549863	ENSG00000163507.16	0	-
chr1	155649445	155659445	ENSG00000163374.22	0	-
chr1	224370145	224385145	ENSG00000162923.18	0	-
chr1	89096131	89106131	ENSG00000162645.14	0	-
chr1	77934054	77944054	ENSG00000162613.19	0	-
chr16	36406	46406	ENSG00000161980.7	0	-
chr17	44024327	44034327	ENSG00000161654.11	0	-
chr4	1156931	1166931	ENSG00000159674.13	0	-
chr21	33493370	33503370	ENSG00000159131.18	0	-
chr11	6670384	6680384	ENSG00000158042.10	0	-
chr4	56327993	56337993	ENSG00000157426.15	0	-
chr2	200963717	200973717	ENSG00000155744.11	0	-
chr1	112896846	112911846	ENSG00000155380.14	0	-
chr21	26820754	26835754	ENSG00000154734.17	0	-
chr8	73929168	73939168	ENSG00000154582.19	0	-
chr1	244810637	244840637	ENSG00000153187.22	0	-
chr4	82397564	82422564	ENSG00000152795.19	0	-
chr11	107311600	107321600	ENSG00000152404.17	0	-
chr2	9473485	9488485	ENSG00000151694.16	0	-
chr4	98863760	98878760	ENSG00000151247.14	0	-
chr5	10210506	10225506	ENSG00000150756.15	0	-
chr8	73275241	73290241	ENSG00000147604.15	0	-
chr8	22605417	22620417	ENSG00000147439.15	0	-
chrX	136838003	136848003	ENSG00000147274.15	0	-
chr6	87503458	87513458	ENSG00000146282.20	0	-
chr3	12784484	12834484	ENSG00000144713.14	0	-
chr1	226979864	226989864	ENSG00000143776.21	0	-
chr1	211925398	211940398	ENSG00000143493.14	0	-
chr1	150580850	150600850	ENSG00000143420.20	0	-
chr1	156710795	156720795	ENSG00000143319.19	0	-
chr1	67312809	67407809	ENSG00000142864.16	0	-
chr19	36314452	36334452	ENSG00000142065.15	0	-
chr17	80114368	80134368	ENSG00000141543.13	0	-
chr12	31265583	31280583	ENSG00000139146.15	0	-
chr4	82331522	82351522	ENSG00000138668.21	0	-
chr15	55170796	55180796	ENSG00000137876.12	0	-
chr11	111716907	111726907	ENSG00000137713.17	0	-
chr11	85632741	85657741	ENSG00000137504.16	0	-
chr9	19335714	19375714	ENSG00000137154.14	0	-
chr3	185874557	185914557	ENSG00000136527.20	0	-
chr17	57960918	58000918	ENSG00000136450.13	0	-
chr7	47951881	47961881	ENSG00000136273.15	0	-
chr12	104786800	104801800	ENSG00000136052.11	0	-
chr6	87609859	87674859	ENSG00000135334.10	0	-
chr6	85429775	85504775	ENSG00000135317.15	0	-
chr6	85587778	85607778	ENSG00000135316.20	0	-
chr13	110626410	110641410	ENSG00000134905.18	0	-
chr12	92030277	92140277	ENSG00000133639.6	0	-
chr13	45313470	45333470	ENSG00000133112.18	0	-
chr17	75766433	75776433	ENSG00000132475.11	0	-
chr7	50434127	50444127	ENSG00000132436.14	0	-
chr1	46251195	46261195	ENSG00000132128.19	0	-
chr16	85661197	85676197	ENSG00000131153.10	0	-
chr6	149494494	149504494	ENSG00000131013.5	0	-
chrX	6647864	6667864	ENSG00000130021.16	0	-
chrX	53156276	53176276	ENSG00000126012.15	0	-
chr1	23288770	23303770	ENSG00000125944.23	0	-
chr20	2446633	2461633	ENSG00000125835.21	0	-
chr13	106474744	106489744	ENSG00000125266.9	0	-
chr16	58509950	58519950	ENSG00000125107.20	0	-
chr6	18193859	18223859	ENSG00000124795.18	0	-
chr6	27052656	27122656	ENSG00000124635.11	0	-
chr6	26007031	26017031	ENSG00000124610.5	0	-
chr12	113806737	113816737	ENSG00000122965.12	0	-
chr7	26151150	26171150	ENSG00000122566.24	0	-
chr3	113706457	113716457	ENSG00000121579.15	0	-
chr13	19664751	19674751	ENSG00000121390.20	0	-
chr1	173774549	173799549	ENSG00000120334.17	0	-
chr5	172756991	172766991	ENSG00000120129.7	0	-
chr10	110275729	110290729	ENSG00000119953.15	0	-
chr9	120845650	120855650	ENSG00000119403.16	0	-
chr1	236534004	236549004	ENSG00000119285.12	0	-
chr1	46020139	46040139	ENSG00000117461.16	0	-
chr1	45495913	45510913	ENSG00000117450.16	0	-
chr1	231322752	231332752	ENSG00000116903.7	0	-
chr1	185282930	185292930	ENSG00000116679.18	0	-
chr1	35131377	35176377	ENSG00000116560.12	0	-
chr1	111409889	111439889	ENSG00000116455.14	0	-
chr2	99308981	99318981	ENSG00000115514.13	0	-
chr2	231428530	231453530	ENSG00000115053.18	0	-
chr3	156524552	156539552	ENSG00000114850.8	0	-
chr5	134183977	134193977	ENSG00000113575.14	0	-
chr5	37278136	37288136	ENSG00000113569.18	0	-
chr5	134103934	134148934	ENSG00000113558.20	0	-
chr6	24669855	24704855	ENSG00000112308.15	0	-
chr6	122433347	122443347	ENSG00000111897.8	0	-
chr12	112016688	112026688	ENSG00000111300.11	0	-
chr12	12448281	12473281	ENSG00000111266.10	0	-
chr11	90190428	90200428	ENSG00000110172.13	0	-
chr4	2915558	2930558	ENSG00000109736.16	0	-
chr4	7048642	7058642	ENSG00000109519.15	0	-
chr4	102783515	102793515	ENSG00000109332.21	0	-
chr4	99783335	99878335	ENSG00000109270.14	0	-
chr19	55384744	55399744	ENSG00000108106.15	0	-
chr9	72316411	72351411	ENSG00000107372.14	0	-
chr9	37900897	37915897	ENSG00000107338.11	0	-
chr9	112030776	112040776	ENSG00000106868.18	0	-
chr7	106238297	106248297	ENSG00000105835.14	0	-
chr19	39810349	39825349	ENSG00000105204.14	0	-
chr16	87666484	87696484	ENSG00000104731.15	0	-
chr8	65592455	65602455	ENSG00000104442.11	0	-
chr16	19691936	19701936	ENSG00000103550.15	0	-
chr16	86520177	86530177	ENSG00000103248.20	0	-
chr13	51314076	51354076	ENSG00000102786.16	0	-
chrX	16804282	16839282	ENSG00000102054.19	0	-
chr20	34265267	34280267	ENSG00000101444.13	0	-
chr22	41500798	41525798	ENSG00000100413.18	0	-
chr22	39297869	39312869	ENSG00000100316.17	0	-
chr22	29495878	29505878	ENSG00000100296.15	0	-
chr14	21177374	21207374	ENSG00000092199.20	0	-
chr14	94028286	94048286	ENSG00000089737.20	0	-
chr13	72732168	72752168	ENSG00000083520.16	0	-
chr5	154877410	154887410	ENSG00000082516.9	0	-
chr6	132420866	132445866	ENSG00000079950.15	0	-
chr3	185633129	185643129	ENSG00000073792.17	0	-
chr12	270056	280056	ENSG00000073614.13	0	-
chrX	53359148	53374148	ENSG00000072501.20	0	-
chr10	1029151	1039151	ENSG00000067064.13	0	-
chr1	197074120	197084120	ENSG00000066279.20	0	-
chr2	20238690	20248690	ENSG00000055917.18	0	-
chr1	19291990	19301990	ENSG00000053371.14	0	-
chr1	244398493	244408493	ENSG00000035687.10	0	-
chr6	155246133	155256133	ENSG00000029639.12	0	-
chr16	2038707	2088707	ENSG00000008710.20	0	-
chr1	112513486	112523486	ENSG00000007341.20	0	-
chr13	76977597	76992597	ENSG00000005812.12	0	-

[truncated: 7 more sheets: OSCHX_Conv_2.dogs, OSCHX_hiAPGC_1.dogs, OSCHX_hiAPGC_2.dogs, OSCHX_SERIPH1st_1.dogs, OSCHX_SERIPH1st_2.dogs, OSCHX_SERIPH2nd_1.dogs, OSCHX_SERIPH2nd_2.dogs]
