# Supplementary material
Source: HighWire-hosted journal article supplement (doi:10.1101/rna.081061.126)
Supplement: Supplemental_Table_S3.xlsx [file Supplemental_Table_S3.xlsx]

## Sheet: all_samples_gene_processing_met
sample_id	condition	gene_id	gene_name	chrom	start	end	strand	gene_len	exon_len_total	intron_len_total	n_introns_used	exon_cov_mean	exon_cov_median	intron_cov_mean	intron_cov_median	GIF	EPPS	intron_cov_cv	IUS	junction_reads	total_reads	SJSS	TBS	usable	category
Ctrl_SERIPH1st_1	Ctrl_Conv1st	ENSG00000274847.1	MAFIP	GL000194.1	53593	115055	-	61462	1599	59863	3	14.2577	16.3803	11.0533	9.90049	0.434982	0.364349	0.590313	0.409687	23	2291	0.0100388	-0.690142	TRUE	pre_mRNA_like
Ctrl_SERIPH1st_1	Ctrl_Conv1st	ENSG00000290825.2	DDX11L16	chr1	11120	24894	+	13774	2898	10778	3	0	0	0	0	0	0	0	1	0	0	0	0	FALSE	low_coverage
Ctrl_SERIPH1st_1	Ctrl_Conv1st	ENSG00000310526.1	WASH7P	chr1	14355	30744	-	16389	6775	9614	11	10.4199	0.983978	1.24163	0.196514	0.105567	2.97107	2.3283	-1.3283	87	288	0.301978	5.77106	TRUE	mature_mRNA_like
Ctrl_SERIPH1st_1	Ctrl_Conv1st	ENSG00000243485.6	MIR1302-2HG	chr1	28588	31109	+	2521	1743	743	3	0	0	0	0	0	0	0	1	0	0	0	0	FALSE	low_coverage
Ctrl_SERIPH1st_1	Ctrl_Conv1st	ENSG00000237613.3	FAM138A	chr1	34552	37595	-	3043	1743	1300	3	0	0	0	0	0	0	0	1	15	15	0.993377	0	FALSE	low_coverage
Ctrl_SERIPH1st_1	Ctrl_Conv1st	ENSG00000186092.7	OR4F5	chr1	65418	71585	+	6167	2618	3463	1	0	0	0	0	0	0			0	0	0	0	FALSE	low_coverage
Ctrl_SERIPH1st_1	Ctrl_Conv1st	ENSG00000308415.1	DDX11L2	chr1	180930	184937	+	4007	3079	928	4	0	0	0	0	0	0	0	1	0	0	0	0	FALSE	low_coverage
Ctrl_SERIPH1st_1	Ctrl_Conv1st	ENSG00000310527.1	WASH9P	chr1	182145	201244	-	19099	7602	11497	11	6.30439	0.642807	3.74158	0.530989	0.368775	0.73736	1.55253	-0.55253	79	317	0.249133	2.34767	TRUE	partially_spliced
Ctrl_SERIPH1st_1	Ctrl_Conv1st	ENSG00000284733.2	OR4F29	chr1	450739	451678	-	939	939			0	0							7	7	0.985915	0	FALSE	low_coverage
Ctrl_SERIPH1st_1	Ctrl_Conv1st	ENSG00000284662.2	OR4F16	chr1	685715	686654	-	939	939			0	0							3	3	0.967742	0	FALSE	low_coverage
Ctrl_SERIPH1st_1	Ctrl_Conv1st	ENSG00000177757.3	FAM87B	chr1	817362	819842	+	2480	1960	520	1	0	0	0	0	0	0			2	2	0.952381	0	FALSE	low_coverage
Ctrl_SERIPH1st_1	Ctrl_Conv1st	ENSG00000230368.3	FAM41C	chr1	868051	877032	-	8981	2422	6538	4	0.00454165	0	0	0	0	0.0640779	0	1	1	1	0.909091	0.0577345	FALSE	low_coverage
Ctrl_SERIPH1st_1	Ctrl_Conv1st	ENSG00000187634.14	SAMD11	chr1	923922	944575	+	20653	4172	16481	13	50.4871	63.7516	5.61404	3.19062	0.099892	3.14619	0.819633	0.180367	368	1013	0.363242	0.804129	TRUE	mature_mRNA_like
Ctrl_SERIPH1st_1	Ctrl_Conv1st	ENSG00000188976.12	NOC2L	chr1	943526	960714	-	17188	7978	8925	17	110.829	192.541	3.05322	2.33835	0.0267869	5.13666	1.0312	-0.0312013	2253	3042	0.740607	0.951005	TRUE	mature_mRNA_like
Ctrl_SERIPH1st_1	Ctrl_Conv1st	ENSG00000187961.16	KLHL17	chr1	960575	965719	+	5144	3410	1431	5	30.8836	29.9379	5.45563	5.21053	0.149719	2.47948	0.886613	0.113387	104	402	0.258642	0.391758	TRUE	mature_mRNA_like
Ctrl_SERIPH1st_1	Ctrl_Conv1st	ENSG00000187583.12	PLEKHN1	chr1	966436	975865	+	9429	3520	5492	9	0.471023	0	0.13729	0	0.193827	1.26689	0.54969	0.45031	3	11	0.27027	-0.330223	FALSE	low_coverage
Ctrl_SERIPH1st_1	Ctrl_Conv1st	ENSG00000187642.11	PERM1	chr1	975193	982134	-	6941	4242	2636	3	0.0711931	0	0	0	0	0.775624	0	1	0	1	0	-1.29309	FALSE	low_coverage
Ctrl_SERIPH1st_1	Ctrl_Conv1st	ENSG00000188290.12	HES4	chr1	998961	1000172	-	1211	1118			247.789	260.512							210	940	0.22338	1.40056	TRUE	unclassified
Ctrl_SERIPH1st_1	Ctrl_Conv1st	ENSG00000187608.11	ISG15	chr1	1001137	1014540	+	13403	3498	9818	4	14.2662	10.0419	6.11184	5.31894	0.298459	1.20958	0.390502	0.609498	8	375	0.0213276	-0.771179	TRUE	unclassified
Ctrl_SERIPH1st_1	Ctrl_Conv1st	ENSG00000188157.16	AGRN	chr1	1020119	1056119	+	36000	10762	24087	22	49.2997	55.1968	1.67634	1.09091	0.0328205	4.79752	1.16348	-0.163482	1003	1908	0.525654	2.75534	TRUE	mature_mRNA_like
Ctrl_SERIPH1st_1	Ctrl_Conv1st	ENSG00000237330.3	RNF223	chr1	1070966	1074306	-	3340	1900	1440	1	0.317894	0.187694	0	0	0	2.06314			0	2	0	1.49384	FALSE	low_coverage
Ctrl_SERIPH1st_1	Ctrl_Conv1st	ENSG00000131591.19	C1orf159	chr1	1081810	1116361	-	34551	10322	24229	13	18.4247	10.0101	7.04094	7.08306	0.275406	1.37527	0.747275	0.252725	120	1210	0.0991654	0.425798	TRUE	unclassified
Ctrl_SERIPH1st_1	Ctrl_Conv1st	ENSG00000205231.1	TTLL10-AS1	chr1	1173055	1179555	-	6500	3532	2968	1	0	0	0	0	0	0			0	0	0	0	FALSE	low_coverage
Ctrl_SERIPH1st_1	Ctrl_Conv1st	ENSG00000162571.15	TTLL10	chr1	1173879	1197940	+	24061	6149	17881	14	0	0	0	0	0	0	0	1	0	0	0	0	FALSE	low_coverage
Ctrl_SERIPH1st_1	Ctrl_Conv1st	ENSG00000186891.14	TNFRSF18	chr1	1203507	1206592	-	3085	1271	1749	3	0	0	0	0	0	0	0	1	0	0	0	0	FALSE	low_coverage
Ctrl_SERIPH1st_1	Ctrl_Conv1st	ENSG00000186827.12	TNFRSF4	chr1	1211325	1214153	-	2828	1975	853	3	0	0	0	0	0	0	0	1	0	0	0	0	FALSE	low_coverage
Ctrl_SERIPH1st_1	Ctrl_Conv1st	ENSG00000078808.21	SDF4	chr1	1216886	1238870	-	21984	8253	13731	6	35.4795	35.1379	2.62887	2.45772	0.0688036	3.70467	1.05399	-0.0539908	475	1100	0.431779	6.82362	TRUE	mature_mRNA_like
Ctrl_SERIPH1st_1	Ctrl_Conv1st	ENSG00000176022.7	B3GALT6	chr1	1232236	1235041	+	2805	2805			91.1832	91.1832							2	858	0.00233073	1.14525	TRUE	unclassified
Ctrl_SERIPH1st_1	Ctrl_Conv1st	ENSG00000184163.3	C1QTNF12	chr1	1242445	1246722	-	4277	1794	2483	4	0.336678	0	0.121627	0	0.21785	0.978437	0.514032	0.485968	0	3	0	0.769213	FALSE	low_coverage
Ctrl_SERIPH1st_1	Ctrl_Conv1st	ENSG00000160087.22	UBE2J2	chr1	1253906	1274477	-	20571	5914	14580	10	40.988	22.2375	5.93155	5.3039	0.126151	2.76812	0.650269	0.349731	292	1099	0.265672	1.21845	TRUE	mature_mRNA_like
Ctrl_SERIPH1st_1	Ctrl_Conv1st	ENSG00000162572.21	SCNN1D	chr1	1280435	1292029	+	11594	4025	7302	12	2.71851	3.49968	0.874007	0.004902	0.236697	1.53293	1.4386	-0.438596	21	58	0.361446	0.120912	TRUE	partially_spliced
Ctrl_SERIPH1st_1	Ctrl_Conv1st	ENSG00000131584.20	ACAP3	chr1	1292375	1309609	-	17234	8994	7840	18	15.5287	23.4375	1.2324	0.164385	0.0730913	3.5521	2.07744	-1.07744	226	501	0.451008	2.18678	TRUE	mature_mRNA_like
Ctrl_SERIPH1st_1	Ctrl_Conv1st	ENSG00000169972.14	PUSL1	chr1	1308566	1311677	+	3111	2670	371	2	56.033	36.6757	2.97305	3.93306	0.0503002	4.19111	0.609045	0.390955	347	516	0.67235	0.21177	TRUE	mature_mRNA_like
Ctrl_SERIPH1st_1	Ctrl_Conv1st	ENSG00000127054.23	INTS11	chr1	1311584	1324687	-	13103	8279	4577	5	33.7577	30.7706	7.45969	4.71307	0.180546	2.16309	0.944136	0.0558639	572	1050	0.54471	1.50435	TRUE	partially_spliced
Ctrl_SERIPH1st_1	Ctrl_Conv1st	ENSG00000224051.8	CPTP	chr1	1324755	1328897	+	4142	3934	208	1	19.3658	20.8095	2.93269	2.93269	0.130933	2.68227			26	258	0.100736	0.971084	TRUE	mature_mRNA_like
Ctrl_SERIPH1st_1	Ctrl_Conv1st	ENSG00000169962.5	TAS1R3	chr1	1331279	1335314	+	4035	3475	475	4	0.0869064	0	0	0	0	0.902316	0	1	3	4	0.731707	0.438066	FALSE	low_coverage
Ctrl_SERIPH1st_1	Ctrl_Conv1st	ENSG00000107404.22	DVL1	chr1	1335275	1349945	-	14670	4409	9991	8	101.929	146.455	2.74507	2.03079	0.0261998	5.16438	0.740582	0.259418	898	1591	0.564389	3.00376	TRUE	mature_mRNA_like
Ctrl_SERIPH1st_1	Ctrl_Conv1st	ENSG00000162576.18	MXRA8	chr1	1352688	1361777	-	9089	3706	5214	4	2.56962	2.37056	0.0899499	0.05803	0.0325957	3.81294	1.13463	-0.134632	15	35	0.42735	4.03456	TRUE	mature_mRNA_like
Ctrl_SERIPH1st_1	Ctrl_Conv1st	ENSG00000175756.15	AURKAIP1	chr1	1373728	1375521	-	1793	1696			141.293	214.7							165	802	0.20571	3.30795	TRUE	unclassified
Ctrl_SERIPH1st_1	Ctrl_Conv1st	ENSG00000221978.14	CCNL2	chr1	1385710	1399339	-	13629	6955	6472	9	61.3679	52.0057	6.47667	4.26058	0.0953228	3.22441	0.777533	0.222467	396	1567	0.252696	1.43058	TRUE	mature_mRNA_like
Ctrl_SERIPH1st_1	Ctrl_Conv1st	ENSG00000224870.10	MRPL20-AS1	chr1	1399475	1402054	+	2579	2579			29.2152	29.2152							47	257	0.182808	-0.0848135	TRUE	unclassified
Ctrl_SERIPH1st_1	Ctrl_Conv1st	ENSG00000242485.7	MRPL20	chr1	1401907	1407306	-	5399	2781	2618	2	57.5516	46.5222	8.144	6.125	0.123777	2.80594	0.35439	0.64561	336	608	0.552541	-2.25876	TRUE	mature_mRNA_like
Ctrl_SERIPH1st_1	Ctrl_Conv1st	ENSG00000272455.1	MRPL20-DT	chr1	1409095	1410618	+	1523	1523			10.2613	10.2613							3	57	0.0525394	2.33106	TRUE	unclassified
Ctrl_SERIPH1st_1	Ctrl_Conv1st	ENSG00000235098.10	ANKRD65	chr1	1415636	1421769	-	6133	5427	706	2	0.055648	0	0	0	0	0.638287	0	1	1	2	0.47619	0	FALSE	low_coverage
Ctrl_SERIPH1st_1	Ctrl_Conv1st	ENSG00000225905.2	ANKRD65-AS1	chr1	1420244	1423287	+	3043	1222	1821	2	0.247136	0	0.165843	0.10182	0.323294	0.384926	0.50451	0.49549	3	5	0.588235	2.10762	FALSE	low_coverage
Ctrl_SERIPH1st_1	Ctrl_Conv1st	ENSG00000205116.4	TMEM88B	chr1	1425870	1430255	+	4385	3217	1168	1	0	0	0	0	0	0			3	3	0.967742	0	FALSE	low_coverage
Ctrl_SERIPH1st_1	Ctrl_Conv1st	ENSG00000179403.13	VWA1	chr1	1434860	1442882	+	8022	5118	2904	3	7.83724	4.86881	0.93354	0	0.105238	2.94104	1.20194	-0.201935	13	146	0.0889802	1.51406	TRUE	mature_mRNA_like
Ctrl_SERIPH1st_1	Ctrl_Conv1st	ENSG00000215915.10	ATAD3C	chr1	1449688	1470163	+	20475	3981	16494	11	0.343381	0	0.0548685	0	0.110122	1.5175	1.08961	-0.0896105	4	12	0.330579	-0.791922	FALSE	low_coverage
Ctrl_SERIPH1st_1	Ctrl_Conv1st	ENSG00000160072.21	ATAD3B	chr1	1471755	1497848	+	26093	7806	18287	13	33.4166	44.0441	7.25242	3.43944	0.17789	2.18858	1.54572	-0.545724	432	1327	0.325522	-0.684323	TRUE	partially_spliced
Ctrl_SERIPH1st_1	Ctrl_Conv1st	ENSG00000197785.15	ATAD3A	chr1	1512146	1534686	+	22540	3379	19105	16	89.8284	135.593	5.01926	3.08554	0.0528635	4.13477	0.870992	0.129008	709	1339	0.52946	1.3565	TRUE	mature_mRNA_like
Ctrl_SERIPH1st_1	Ctrl_Conv1st	ENSG00000205090.10	TMEM240	chr1	1534777	1540624	-	5847	2009	3757	2	0.907416	0.770088	1.87517	3.73286	0.650516	-0.971314	0.659995	0.340005	1	32	0.0311526	-1.88366	TRUE	pre_mRNA_like
Ctrl_SERIPH1st_1	Ctrl_Conv1st	ENSG00000160075.13	SSU72	chr1	1541672	1574884	-	33212	6943	26269	4	74.5571	188.029	5.79493	4.25084	0.0720296	3.66273	0.46878	0.53122	592	2246	0.263568	1.04179	TRUE	mature_mRNA_like
Ctrl_SERIPH1st_1	Ctrl_Conv1st	ENSG00000215014.5	SSU72-AS1	chr1	1574101	1577075	+	2974	2380	594	1	2.98109	1.66393	2.07407	2.07407	0.402329	0.503041			5	32	0.155763	0.311595	TRUE	partially_spliced
Ctrl_SERIPH1st_1	Ctrl_Conv1st	ENSG00000228594.4	FNDC10	chr1	1598011	1600135	-	2124	2124			18.1789	18.1789							0	128	0	3.95944	TRUE	unclassified
Ctrl_SERIPH1st_1	Ctrl_Conv1st	ENSG00000197530.14	MIB2	chr1	1615433	1630610	+	15177	10594	4203	8	14.6928	20.1386	2.76374	1.38165	0.15742	2.36892	0.875682	0.124318	333	563	0.591369	1.98419	TRUE	partially_spliced
Ctrl_SERIPH1st_1	Ctrl_Conv1st	ENSG00000189409.15	MMP23B	chr1	1631664	1635263	+	3599	2703	829	3	0.976692	0.192878	0	0	0	3.42853	0	1	6	13	0.458015	-4.02142	FALSE	low_coverage
Ctrl_SERIPH1st_1	Ctrl_Conv1st	ENSG00000248333.10	CDK11B	chr1	1635224	1659234	-	24010	4185	19186	17	23.2891	6.82353	2.11847	1.97403	0.0830526	3.3982	0.666906	0.333094	271	474	0.571609	3.0085	TRUE	mature_mRNA_like
Ctrl_SERIPH1st_1	Ctrl_Conv1st	ENSG00000189339.13	SLC35E2B	chr1	1659528	1693017	-	33489	11081	22404	11	32.8901	11.2267	2.72059	1.66623	0.0761841	3.54797	1.15317	-0.153168	134	1435	0.0933733	3.45267	TRUE	mature_mRNA_like
Ctrl_SERIPH1st_1	Ctrl_Conv1st	ENSG00000008128.24	CDK11A	chr1	1702378	1724482	-	22104	5333	16563	12	7.33677	1.70016	1.19278	0.722469	0.13822	2.5242	0.914645	0.0853553	106	215	0.492794	2.23871	TRUE	mature_mRNA_like
Ctrl_SERIPH1st_1	Ctrl_Conv1st	ENSG00000008130.16	NADK	chr1	1751231	1780544	-	29313	7590	21669	16	29.6295	23.1986	4.34589	4.13993	0.127537	2.74135	0.773473	0.226527	373	1062	0.351191	2.8417	TRUE	mature_mRNA_like
Ctrl_SERIPH1st_1	Ctrl_Conv1st	ENSG00000078369.20	GNB1	chr1	1785284	1892292	-	107008	12602	94368	29	103.521	7.54037	3.70525	3.2352	0.0345233	4.76718	0.492681	0.507319	2413	5521	0.437051	2.85261	TRUE	mature_mRNA_like
Ctrl_SERIPH1st_1	Ctrl_Conv1st	ENSG00000231050.4	GNB1-DT	chr1	1891174	1892835	+	1661	1574			4.93647	2.84615							5	32	0.155763	3.75489	TRUE	unclassified
Ctrl_SERIPH1st_1	Ctrl_Conv1st	ENSG00000169885.10	CALML6	chr1	1915107	1917296	+	2189	2040			0.888235	0.807155							2	6	0.327869	3.34955	FALSE	low_coverage
Ctrl_SERIPH1st_1	Ctrl_Conv1st	ENSG00000178821.14	TMEM52	chr1	1917588	1919329	-	1741	1651			6.75348	8.10354							7	37	0.188679	3.64393	TRUE	unclassified
Ctrl_SERIPH1st_1	Ctrl_Conv1st	ENSG00000142609.20	CFAP74	chr1	1921950	2003837	-	81887	10422	71465	38	0.0897141	0	0.0376268	0	0.165508	0.463066	1.0046	-0.0046004	0	12	0	0.988	FALSE	low_coverage
Ctrl_SERIPH1st_1	Ctrl_Conv1st	ENSG00000187730.10	GABRD	chr1	2019328	2030758	+	11430	5525	5774	6	0.858824	1.10909	0.108417	0.003584	0.101586	2.20179	0.546129	0.453871	8	18	0.441989	1.27567	FALSE	low_coverage
Ctrl_SERIPH1st_1	Ctrl_Conv1st	ENSG00000226969.2	PRKCZ-DT	chr1	2049201	2050176	-	975	846	129	1	1.68085	1.9404	0.682171	0.682171	0.276965	1.18701			1	5	0.196078	2.88663	TRUE	partially_spliced
Ctrl_SERIPH1st_1	Ctrl_Conv1st	ENSG00000067606.18	PRKCZ	chr1	2050410	2185395	+	134985	7983	126859	34	13.0279	5.16117	1.01919	0.962785	0.072042	3.55212	0.783764	0.216236	288	782	0.368239	1.05362	TRUE	mature_mRNA_like
Ctrl_SERIPH1st_1	Ctrl_Conv1st	ENSG00000182873.5	PRKCZ-AS1	chr1	2181793	2184389	-	2596	1734	862	2	6.21453	5.86214	5.28538	5.83414	0.45564	0.229627	0.126129	0.873871	0	53	0	-0.212057	TRUE	pre_mRNA_like
Ctrl_SERIPH1st_1	Ctrl_Conv1st	ENSG00000162585.18	FAAP20	chr1	2184460	2212720	-	28260	10916	17077	9	13.3747	0.942839	1.5888	0.376831	0.105474	2.99618	1.46305	-0.463052	156	584	0.267078	4.98233	TRUE	mature_mRNA_like
Ctrl_SERIPH1st_1	Ctrl_Conv1st	ENSG00000157933.12	SKI	chr1	2227387	2310213	+	82826	6687	76139	9	178.55	157.66	5.47135	1.19337	0.0297161	5.00296	1.02342	-0.0234195	702	5376	0.130578	1.67085	TRUE	mature_mRNA_like
Ctrl_SERIPH1st_1	Ctrl_Conv1st	ENSG00000116151.15	MORN1	chr1	2319207	2391707	-	72500	13715	58785	15	5.20365	3.75647	2.26236	1.01712	0.299017	1.16675	1.20855	-0.208549	46	683	0.0673401	-3.85428	TRUE	unclassified
Ctrl_SERIPH1st_1	Ctrl_Conv1st	ENSG00000157916.21	RER1	chr1	2390669	2405444	+	14775	8504	6271	6	36.5941	90.2857	4.87482	3.82003	0.117271	2.88283	0.614478	0.385522	458	1140	0.401719	1.73763	TRUE	mature_mRNA_like
Ctrl_SERIPH1st_1	Ctrl_Conv1st	ENSG00000157911.12	PEX10	chr1	2403963	2413797	-	9834	3792	6042	8	26.1875	21.7076	2.89689	2.80977	0.0992616	3.13284	0.661853	0.338147	66	390	0.169187	2.89613	TRUE	mature_mRNA_like
Ctrl_SERIPH1st_1	Ctrl_Conv1st	ENSG00000149527.18	PLCH2	chr1	2425979	2505532	+	79553	10809	68744	21	0.0257193	0	0.00328758	0	0.0254838	0.283539	0.132674	0.867326	1	2	0.47619	0.276421	FALSE	low_coverage
Ctrl_SERIPH1st_1	Ctrl_Conv1st	ENSG00000157881.17	PANK4	chr1	2508533	2526612	-	18079	5132	12947	19	29.916	36.3548	5.63752	2.26715	0.15812	2.38723	0.94174	0.0582596	342	761	0.44935	-0.00264833	TRUE	partially_spliced
Ctrl_SERIPH1st_1	Ctrl_Conv1st	ENSG00000197921.6	HES5	chr1	2528744	2530263	-	1519	1324			18.5325	19							9	82	0.109622	0.771142	TRUE	unclassified
Ctrl_SERIPH1st_1	Ctrl_Conv1st	ENSG00000238164.7	TNFRSF14-AS1	chr1	2540860	2557059	-	16199	9357	6842	6	0.105269	0	0.0767319	0	0.272098	0.215952	0.542473	0.457527	0	5	0	0.95017	FALSE	low_coverage
Ctrl_SERIPH1st_1	Ctrl_Conv1st	ENSG00000157873.19	TNFRSF14	chr1	2554243	2565382	+	11139	6827	4234	7	0.00703117	0	0.131318	0	0.550948	-1.11185	1.42088	-0.420883	0	2	0	0	FALSE	low_coverage
Ctrl_SERIPH1st_1	Ctrl_Conv1st	ENSG00000157870.18	PRXL2B	chr1	2586490	2591470	+	4980	3372	1515	4	12.0875	6.21594	0.0369635	0.0011235	0.00302374	6.47546	0.465978	0.534022	32	136	0.235121	2.74242	TRUE	mature_mRNA_like
Ctrl_SERIPH1st_1	Ctrl_Conv1st	ENSG00000142606.16	MMEL1	chr1	2590638	2633016	-	42378	3870	38448	22	0	0	0	0	0	0	0	1	0	0	0	0	FALSE	low_coverage
Ctrl_SERIPH1st_1	Ctrl_Conv1st	ENSG00000237058.2	MMEL1-AS1	chr1	2628687	2636624	+	7937	1721	6216	6	0	0	0	0	0	0	0	1	0	0	0	0	FALSE	low_coverage
Ctrl_SERIPH1st_1	Ctrl_Conv1st	ENSG00000215912.13	TTC34	chr1	2636985	2801693	-	164708	7780	156928	8	2.08188	0	0.0250051	0	0.0113305	4.12551	1.78433	-0.784327	0	67	0	2.34263	TRUE	mature_mRNA_like
Ctrl_SERIPH1st_1	Ctrl_Conv1st	ENSG00000169717.7	ACTRT2	chr1	3021466	3022903	+	1437	1437			0	0							0	0	0	0	FALSE	low_coverage
Ctrl_SERIPH1st_1	Ctrl_Conv1st	ENSG00000177133.15	PRDM16-DT	chr1	3059563	3070251	-	10688	6805	3818	2	0.133137	0	0	0	0	1.22118	0	1	0	3	0	1.93549	FALSE	low_coverage
Ctrl_SERIPH1st_1	Ctrl_Conv1st	ENSG00000142611.17	PRDM16	chr1	3069167	3438621	+	369454	9767	359687	19	1.68097	0.076923	0.0495011	0.028196	0.0270429	3.57443	0.869472	0.130528	21	114	0.184049	1.44128	TRUE	mature_mRNA_like
Ctrl_SERIPH1st_1	Ctrl_Conv1st	ENSG00000130762.16	ARHGEF16	chr1	3454549	3481127	+	26578	5844	20734	17	3.13433	3.30575	0.381836	0	0.105592	2.74685	1.18212	-0.182117	39	87	0.447761	0.00130278	TRUE	mature_mRNA_like
Ctrl_SERIPH1st_1	Ctrl_Conv1st	ENSG00000162591.18	MEGF6	chr1	3487941	3611543	-	123602	9065	114201	34	0.672256	0.503876	0.19738	0.026936	0.203561	1.37677	1.24984	-0.249835	12	96	0.12487	1.6438	FALSE	low_coverage
Ctrl_SERIPH1st_1	Ctrl_Conv1st	ENSG00000158109.16	TPRG1L	chr1	3624978	3630131	+	5153	2441	2712	4	29.7026	25.9808	1.9753	1.96439	0.0621594	3.84405	0.447884	0.552116	72	260	0.276817	0.871125	TRUE	mature_mRNA_like
Ctrl_SERIPH1st_1	Ctrl_Conv1st	ENSG00000116213.17	WRAP73	chr1	3630766	3652761	-	21995	7641	14354	6	18.042	30.6667	1.83656	2.16296	0.0919265	3.22777	0.376751	0.623249	234	547	0.42771	1.36167	TRUE	mature_mRNA_like
Ctrl_SERIPH1st_1	Ctrl_Conv1st	ENSG00000078900.17	TP73	chr1	3652515	3736201	+	83686	7373	76313	19	17.2163	18.964	0.937835	0.716994	0.0513765	4.06048	0.845974	0.154026	193	668	0.288879	2.06788	TRUE	mature_mRNA_like
Ctrl_SERIPH1st_1	Ctrl_Conv1st	ENSG00000227589.1	TP73-AS3	chr1	3658937	3668772	-	9835	754	9081	2	0	0	0	0	0	0	0	1	0	0	0	0	FALSE	low_coverage
Ctrl_SERIPH1st_1	Ctrl_Conv1st	ENSG00000235131.1	TP73-AS2	chr1	3712199	3714298	-	2099	351	1748	1	0	0	0	0	0	0			0	0	0	0	FALSE	low_coverage
Ctrl_SERIPH1st_1	Ctrl_Conv1st	ENSG00000293478.2	GFOD3P	chr1	3735510	3747373	-	11863	9700	2010	1	27.2838	16.5347	4.07761	4.07761	0.129607	2.71257			95	918	0.103475	-0.843175	TRUE	mature_mRNA_like
Ctrl_SERIPH1st_1	Ctrl_Conv1st	ENSG00000162592.10	CCDC27	chr1	3746459	3771645	+	25186	4238	20948	13	0	0	0.0226275	0	0.184522	-0.294282	0.849625	0.150375	0	2	0	-0.702643	FALSE	low_coverage
Ctrl_SERIPH1st_1	Ctrl_Conv1st	ENSG00000235169.12	SMIM1	chr1	3772654	3776709	+	4055	3931	124	1	0.73976	1.10372	0	0	0	3.06998			2	10	0.19802	2.04971	FALSE	low_coverage
Ctrl_SERIPH1st_1	Ctrl_Conv1st	ENSG00000130764.11	LRRC47	chr1	3778558	3796511	-	17953	4570	13299	7	62.6713	75.9351	4.70742	4.37784	0.0697615	3.70677	0.708443	0.291557	262	1167	0.224488	1.47654	TRUE	mature_mRNA_like
Ctrl_SERIPH1st_1	Ctrl_Conv1st	ENSG00000116198.15	CEP104	chr1	3812085	3857723	-	45638	12406	33141	25	16.1725	19.0788	2.27513	1.7584	0.122664	2.77636	0.830008	0.169992	402	924	0.435018	0.365034	TRUE	mature_mRNA_like
Ctrl_SERIPH1st_1	Ctrl_Conv1st	ENSG00000169598.18	DFFB	chr1	3857266	3885429	+	28163	3870	24293	9	17.9752	13.0963	2.71502	2.356	0.130591	2.68279	0.627928	0.372072	70	452	0.154833	0.274545	TRUE	mature_mRNA_like
Ctrl_SERIPH1st_1	Ctrl_Conv1st	ENSG00000198912.12	C1orf174	chr1	3889124	3900293	-	11169	4883	6286	2	32.6228	27.9754	2.21779	2.3791	0.0634731	3.81948	0.242028	0.757972	128	581	0.220272	3.86461	TRUE	mature_mRNA_like
Ctrl_SERIPH1st_1	Ctrl_Conv1st	ENSG00000196581.12	AJAP1	chr1	4654608	4792534	+	137926	14551	123375	7	0	0	0	0	0	0	0	1	0	0	0	0	FALSE	low_coverage
Ctrl_SERIPH1st_1	Ctrl_Conv1st	ENSG00000131697.19	NPHP4	chr1	5862803	5993455	-	130652	14192	116373	33	9.32427	11.1452	1.39001	1.35522	0.128535	2.66106	0.712129	0.287871	275	982	0.280012	0.00779159	TRUE	mature_mRNA_like
Ctrl_SERIPH1st_1	Ctrl_Conv1st	ENSG00000069424.16	KCNAB2	chr1	5990926	6101193	+	110267	17212	92762	24	3.10934	1.28361	1.15731	0.83228	0.265033	1.35194	0.809581	0.190419	65	536	0.121246	0.315708	TRUE	partially_spliced
Ctrl_SERIPH1st_1	Ctrl_Conv1st	ENSG00000116254.18	CHD5	chr1	6101786	6180321	-	78535	10094	68175	40	0.217555	0	0.042919	0	0.119063	1.15181	1.04681	-0.0468112	6	17	0.350877	0.700338	FALSE	low_coverage
Ctrl_SERIPH1st_1	Ctrl_Conv1st	ENSG00000116251.12	RPL22	chr1	6185019	6209389	-	24370	5008	19362	7	129.847	4.29498	4.73453	0.640571	0.0351536	4.7484	1.0862	-0.086197	1175	2488	0.472248	6.65248	TRUE	mature_mRNA_like
Ctrl_SERIPH1st_1	Ctrl_Conv1st	ENSG00000226944.2	RNF207-AS1	chr1	6204834	6206041	-	1207	867	340	1	3.38062	3.18027	0.626471	0.626471	0.152534	2.26037			5	12	0.413223	-1.04598	TRUE	partially_spliced
Ctrl_SERIPH1st_1	Ctrl_Conv1st	ENSG00000158286.14	RNF207	chr1	6205391	6221299	+	15908	7290	8362	11	3.23717	2.33161	1.23081	1.32293	0.269442	1.32633	1.37536	-0.375365	9	114	0.0788782	-0.457959	TRUE	unclassified
Ctrl_SERIPH1st_1	Ctrl_Conv1st	ENSG00000116237.17	ICMT	chr1	6221192	6235972	-	14780	5127	9653	5	146.177	151.184	3.65565	6.46086	0.024382	5.2835	0.399999	0.600001	368	2617	0.140614	2.12775	TRUE	mature_mRNA_like
Ctrl_SERIPH1st_1	Ctrl_Conv1st	ENSG00000225077.4	ICMT-DT	chr1	6234691	6239448	+	4757	2677	1960	5	0.433694	0.199209	0	0	0	2.41601	0	1	1	4	0.243902	2.81053	FALSE	low_coverage
Ctrl_SERIPH1st_1	Ctrl_Conv1st	ENSG00000173673.9	HES3	chr1	6244178	6245578	+	1400	710	690	3	0	0	0	0	0	0	0	1	0	0	0	0	FALSE	low_coverage
Ctrl_SERIPH1st_1	Ctrl_Conv1st	ENSG00000158292.8	GPR153	chr1	6247346	6261098	-	13752	4339	9413	5	15.029	14.1693	3.46542	2.21887	0.186368	2.08518	0.72358	0.27642	19	327	0.0580862	2.52911	TRUE	unclassified
Ctrl_SERIPH1st_1	Ctrl_Conv1st	ENSG00000097021.22	ACOT7	chr1	6264267	6393767	-	129500	3501	125999	13	70.7369	80.2488	1.65997	1.58342	0.0228971	5.33088	0.457106	0.542894	492	1525	0.322602	1.89204	TRUE	mature_mRNA_like
Ctrl_SERIPH1st_1	Ctrl_Conv1st	ENSG00000069812.12	HES2	chr1	6412417	6424690	-	12273	6121	5993	3	8.37951	3.4355	0.466043	0.621344	0.0520978	3.905	0.24295	0.75705	6	181	0.0331309	2.79138	TRUE	mature_mRNA_like
Ctrl_SERIPH1st_1	Ctrl_Conv1st	ENSG00000187017.18	ESPN	chr1	6424775	6461367	+	36592	6940	29415	17	2.15072	0.912371	0.227673	0	0.0918631	2.78006	1.48062	-0.480617	22	72	0.305132	1.33189	TRUE	mature_mRNA_like
Ctrl_SERIPH1st_1	Ctrl_Conv1st	ENSG00000215788.12	TNFRSF25	chr1	6460785	6466181	-	5396	4269	1106	5	1.31553	1.22911	0.291139	0	0.170589	1.85559	1.53333	-0.533333	7	20	0.348259	-0.621246	TRUE	partially_spliced
Ctrl_SERIPH1st_1	Ctrl_Conv1st	ENSG00000171680.24	PLEKHG5	chr1	6467121	6520074	-	52953	7482	45139	26	2.09035	0.793651	0.13454	0	0.0578693	3.22326	1.45849	-0.458486	20	73	0.273598	2.00408	TRUE	mature_mRNA_like
Ctrl_SERIPH1st_1	Ctrl_Conv1st	ENSG00000162408.12	NOL9	chr1	6521346	6554536	-	33190	7496	25667	12	87.7799	85.9062	3.89083	3.34534	0.0423973	4.46077	0.703782	0.296218	820	2532	0.323842	1.36763	TRUE	mature_mRNA_like
Ctrl_SERIPH1st_1	Ctrl_Conv1st	ENSG00000173662.21	TAS1R1	chr1	6555306	6579755	+	24449	2764	21685	5	0.0709117	0	0.0186307	0	0.0982932	0.526774	0.100051	0.899949	0	2	0	-0.862614	FALSE	low_coverage
Ctrl_SERIPH1st_1	Ctrl_Conv1st	ENSG00000204859.14	ZBTB48	chr1	6579993	6589280	+	9287	4914	4373	4	21.5395	26.7994	8.50011	6.94974	0.282025	1.33124	0.657965	0.342035	145	478	0.303284	-0.352485	TRUE	partially_spliced
Ctrl_SERIPH1st_1	Ctrl_Conv1st	ENSG00000162413.17	KLHL21	chr1	6590723	6614607	-	23884	6670	17214	4	42.5175	26.1834	3.54334	4.20648	0.0767606	3.54812	0.771816	0.228184	65	1147	0.0566646	5.09328	TRUE	mature_mRNA_like
Ctrl_SERIPH1st_1	Ctrl_Conv1st	ENSG00000116273.7	PHF13	chr1	6613730	6624030	+	10300	3632	6668	3	51.7134	54.5737	2.31794	2.07735	0.0428206	4.42148	0.291503	0.708497	106	681	0.155631	2.61095	TRUE	mature_mRNA_like
Ctrl_SERIPH1st_1	Ctrl_Conv1st	ENSG00000041988.17	THAP3	chr1	6624844	6635586	+	10742	4443	6299	5	13.4236	11.4996	2.46214	2.03644	0.154021	2.40006	0.753504	0.246496	59	253	0.233109	1.79388	TRUE	partially_spliced
Ctrl_SERIPH1st_1	Ctrl_Conv1st	ENSG00000007923.18	DNAJC11	chr1	6634167	6701924	-	67757	12242	55447	15	42.8387	27.648	3.44313	2.65855	0.0742344	3.59918	0.806272	0.193728	759	2390	0.31756	2.63804	TRUE	mature_mRNA_like
Ctrl_SERIPH1st_1	Ctrl_Conv1st	ENSG00000237436.2	CAMTA1-DT	chr1	6783891	6784843	-	952	745	150	1	0.871141	0.623494	0	0	0	3.27968			1	3	0.322581	-1.32181	FALSE	low_coverage
Ctrl_SERIPH1st_1	Ctrl_Conv1st	ENSG00000171735.21	CAMTA1	chr1	6785453	7769706	+	984253	15672	968532	35	11.1714	2.77717	0.437057	0.953771	0.0373284	4.39145	0.871751	0.128249	364	2001	0.1819	-0.583262	TRUE	mature_mRNA_like
Ctrl_SERIPH1st_1	Ctrl_Conv1st	ENSG00000237365.1	CAMTA1-AS3	chr1	7008375	7014279	-	5904	349	5555	1	0	0	0	0	0	0			0	0	0	0	FALSE	low_coverage
Ctrl_SERIPH1st_1	Ctrl_Conv1st	ENSG00000237402.2	CAMTA1-IT1	chr1	7312885	7370277	+	57392	806	56586	5	0.251861	0	0.141554	0.088267	0.286887	0.542657	0.419401	0.580599	0	28	0	-0.302865	FALSE	low_coverage
Ctrl_SERIPH1st_1	Ctrl_Conv1st	ENSG00000237728.3	CAMTA1-AS2	chr1	7379383	7389915	-	10532	1590	8942	4	0	0	0.135093	0	0.574636	-1.23323	0.617276	0.382724	0	4	0	0	FALSE	low_coverage
Ctrl_SERIPH1st_1	Ctrl_Conv1st	ENSG00000225126.2	CAMTA1-AS1	chr1	7440490	7441612	-	1122	799	225	1	0	0	0	0	0	0			2	2	0.952381	0	FALSE	low_coverage
Ctrl_SERIPH1st_1	Ctrl_Conv1st	ENSG00000049245.13	VAMP3	chr1	7771295	7781432	+	10137	2733	7404	5	106.295	128.956	8.75419	7.28285	0.0760246	3.58693	0.682732	0.317268	285	1186	0.240283	1.27348	TRUE	mature_mRNA_like
Ctrl_SERIPH1st_1	Ctrl_Conv1st	ENSG00000049246.16	PER3	chr1	7784290	7845181	+	60891	8387	52339	19	1.86443	1.99783	0.0823096	0.017385	0.0402149	3.42965	0.862753	0.137247	27	68	0.396476	0.929405	TRUE	mature_mRNA_like
Ctrl_SERIPH1st_1	Ctrl_Conv1st	ENSG00000049247.14	UTS2	chr1	7843082	7853512	-	10430	1793	8637	6	0	0	0	0	0	0	0	1	0	0	0	0	FALSE	low_coverage
Ctrl_SERIPH1st_1	Ctrl_Conv1st	ENSG00000049249.11	TNFRSF9	chr1	7915870	7943165	-	27295	6354	20941	10	0.32688	0	0.0288429	0	0.0632904	1.72822	1.0474	-0.0473987	1	9	0.10989	0.767993	FALSE	low_coverage
Ctrl_SERIPH1st_1	Ctrl_Conv1st	ENSG00000116288.14	PARK7	chr1	7954263	7985505	+	31242	3640	27602	9	105.701	59.5879	2.64314	2.6738	0.0243733	5.26938	0.517112	0.482888	1137	1530	0.743089	1.27883	TRUE	mature_mRNA_like
Ctrl_SERIPH1st_1	Ctrl_Conv1st	ENSG00000116285.14	ERRFI1	chr1	8004403	8026312	-	21909	7443	14345	7	12.9414	1.84963	1.28282	2.08698	0.0895556	3.23742	0.469518	0.530482	17	383	0.0443748	-2.01694	TRUE	mature_mRNA_like
Ctrl_SERIPH1st_1	Ctrl_Conv1st	ENSG00000238290.2	ERRFI1-DT	chr1	8026412	8187014	+	160602	7929	152589	10	0.113507	0	0	0	0	1.09429	0	1	0	3	0	-0.247077	FALSE	low_coverage
Ctrl_SERIPH1st_1	Ctrl_Conv1st	ENSG00000162426.17	SLC45A1	chr1	8318103	8344167	+	26064	2634	23430	9	0	0	0	0	0	0	0	1	0	0	0	0	FALSE	low_coverage
Ctrl_SERIPH1st_1	Ctrl_Conv1st	ENSG00000142599.21	RERE	chr1	8352396	8848921	-	496525	14288	482237	37	41.3077	43.4769	1.43365	1.27	0.0334641	4.75486	0.69952	0.30048	680	4286	0.158652	1.94452	TRUE	mature_mRNA_like
Ctrl_SERIPH1st_1	Ctrl_Conv1st	ENSG00000232912.6	RERE-AS1	chr1	8424644	8435013	+	10369	1178	9191	4	0	0	0.185399	0.219324	0.649613	-1.51298	0.920973	0.0790269	0	6	0	-2.47442	FALSE	low_coverage
Ctrl_SERIPH1st_1	Ctrl_Conv1st	ENSG00000074800.17	ENO1	chr1	8860976	8879289	-	18313	6561	11604	16	1321.32	496.275	24.7565	14.602	0.0183902	5.73233	0.690287	0.309713	16914	29826	0.567087	2.67184	TRUE	mature_mRNA_like
Ctrl_SERIPH1st_1	Ctrl_Conv1st	ENSG00000230679.2	ENO1-AS1	chr1	8878463	8880122	+	1659	1057	512	2	2.86944	2.12577	3.35352	3.64396	0.530371	-0.217874	0.264798	0.735202	2	18	0.110497	2.72838	TRUE	pre_mRNA_like
Ctrl_SERIPH1st_1	Ctrl_Conv1st	ENSG00000131686.15	CA6	chr1	8945866	8975092	+	29226	2662	26564	9	0	0	0	0	0	0	0	1	0	0	0	0	FALSE	low_coverage
Ctrl_SERIPH1st_1	Ctrl_Conv1st	ENSG00000197241.4	SLC2A7	chr1	9002972	9026423	-	23451	1944	21507	11	0	0	0	0	0	0	0	1	1	1	0.909091	0	FALSE	low_coverage
Ctrl_SERIPH1st_1	Ctrl_Conv1st	ENSG00000142583.19	SLC2A5	chr1	9035105	9088478	-	53373	6736	46481	13	0	0	0	0	0	0	0	1	1	1	0.909091	0	FALSE	low_coverage
Ctrl_SERIPH1st_1	Ctrl_Conv1st	ENSG00000180758.13	GPR157	chr1	9100304	9129122	-	28818	5324	23494	3	9.17694	8.09478	1.5235	0.749706	0.141059	2.51455	0.479503	0.520497	18	288	0.0624783	1.00045	TRUE	mature_mRNA_like
Ctrl_SERIPH1st_1	Ctrl_Conv1st	ENSG00000228526.9	MIR34AHG	chr1	9139554	9202826	-	63272	10504	52676	6	10.3839	0	4.52109	0.102134	0.301305	1.18188	1.8756	-0.875599	10	1169	0.00855359	6.1786	TRUE	unclassified
Ctrl_SERIPH1st_1	Ctrl_Conv1st	ENSG00000234546.6	LNCTAM34A	chr1	9181587	9198023	+	16436	7554	8810	10	3.27111	2.93937	2.04972	2.36017	0.378118	0.64908	0.689129	0.310871	4	147	0.0271924	-1.01877	TRUE	pre_mRNA_like
Ctrl_SERIPH1st_1	Ctrl_Conv1st	ENSG00000049239.14	H6PD	chr1	9234773	9271337	+	36564	10274	26290	7	10.9781	12.1266	1.41396	1.91892	0.113189	2.87131	0.464418	0.535582	30	501	0.0598683	1.77104	TRUE	mature_mRNA_like
Ctrl_SERIPH1st_1	Ctrl_Conv1st	ENSG00000171621.15	SPSB1	chr1	9292100	9369532	+	77432	7515	69917	10	6.61065	2.63889	1.05331	0.922949	0.135666	2.54068	0.851456	0.148544	14	413	0.0338901	0.483836	TRUE	mature_mRNA_like
Ctrl_SERIPH1st_1	Ctrl_Conv1st	ENSG00000171612.8	SLC25A33	chr1	9539464	9585173	+	45709	3978	41731	7	20.9703	44.3682	2.02444	1.95855	0.087658	3.31006	0.277974	0.722026	110	561	0.196043	1.49826	TRUE	mature_mRNA_like
Ctrl_SERIPH1st_1	Ctrl_Conv1st	ENSG00000188807.14	TMEM201	chr1	9588720	9614877	+	26157	7171	18986	12	54.8728	46.3194	4.71953	4.3075	0.0790642	3.51175	0.677514	0.322486	447	1610	0.277623	1.16833	TRUE	mature_mRNA_like
Ctrl_SERIPH1st_1	Ctrl_Conv1st	ENSG00000171608.19	PIK3CD	chr1	9629888	9730117	+	100229	11398	88347	20	0.872697	0.558564	0.0367755	0	0.0364305	2.83018	0.803999	0.196001	19	45	0.421286	2.34173	FALSE	low_coverage
Ctrl_SERIPH1st_1	Ctrl_Conv1st	ENSG00000179840.5	PIK3CD-AS1	chr1	9652609	9654586	-	1977	1823	154	1	0	0	0	0	0	0			0	0	0	0	FALSE	low_coverage
Ctrl_SERIPH1st_1	Ctrl_Conv1st	ENSG00000231789.5	PIK3CD-AS2	chr1	9672404	9687604	-	15200	1099	14101	3	11.7143	6.68633	0.492164	0.493467	0.0399924	4.31839	0.457515	0.542485	25	66	0.378215	-2.93323	TRUE	mature_mRNA_like
Ctrl_SERIPH1st_1	Ctrl_Conv1st	ENSG00000171603.19	CLSTN1	chr1	9728925	9823993	-	95068	5571	89497	21	134.428	129.706	1.67217	1.05637	0.0122772	6.24625	1.15013	-0.150129	1397	2994	0.466584	3.27106	TRUE	mature_mRNA_like
Ctrl_SERIPH1st_1	Ctrl_Conv1st	ENSG00000178585.16	CTNNBIP1	chr1	9848268	9910368	-	62100	10099	51982	11	4.67472	1.15763	0.695029	0.442895	0.127068	2.58634	0.803678	0.196322	30	279	0.107488	0.657889	TRUE	mature_mRNA_like
Ctrl_SERIPH1st_1	Ctrl_Conv1st	ENSG00000223989.1	CTNNBIP1-AS1	chr1	9848317	9850154	+	1837	424	1413	2	0	0	0	0	0	0	0	1	0	0	0	0	FALSE	low_coverage
Ctrl_SERIPH1st_1	Ctrl_Conv1st	ENSG00000162441.13	LZIC	chr1	9922112	9943407	-	21295	6466	14829	9	25.6387	26.4675	1.22233	0.965135	0.045337	4.28278	0.855989	0.144011	128	616	0.207758	0.674009	TRUE	mature_mRNA_like
Ctrl_SERIPH1st_1	Ctrl_Conv1st	ENSG00000173614.15	NMNAT1	chr1	9943427	9985501	+	42074	5294	36624	6	4.46184	3.9875	0.775147	0.436816	0.145241	2.38202	1.11022	-0.110222	19	176	0.107893	-0.590587	TRUE	mature_mRNA_like
Ctrl_SERIPH1st_1	Ctrl_Conv1st	ENSG00000162444.13	RBP7	chr1	9997053	10016021	+	18968	1134	17834	5	1.33157	1.06196	0	0	0	3.83953	0	1	3	5	0.588235	0.552446	TRUE	mature_mRNA_like
Ctrl_SERIPH1st_1	Ctrl_Conv1st	ENSG00000130939.21	UBE4B	chr1	10032831	10181244	+	148413	9326	138989	31	50.9513	73.0101	1.48099	1.28423	0.0281919	5.01305	0.640889	0.359111	1060	2276	0.465709	1.40432	TRUE	mature_mRNA_like
Ctrl_SERIPH1st_1	Ctrl_Conv1st	ENSG00000054523.21	KIF1B	chr1	10210532	10381606	+	171074	18955	152023	59	38.2006	40.1957	1.29644	0.919818	0.0327407	4.77755	0.956941	0.0430585	1107	3076	0.359871	1.30096	TRUE	mature_mRNA_like
Ctrl_SERIPH1st_1	Ctrl_Conv1st	ENSG00000142657.22	PGD	chr1	10398591	10420511	+	21920	3391	18529	13	192.891	260.045	2.8002	2.90512	0.014302	6.05623	0.826181	0.173819	1604	2357	0.680497	1.38997	TRUE	mature_mRNA_like
Ctrl_SERIPH1st_1	Ctrl_Conv1st	ENSG00000175279.22	CENPS	chr1	10430432	10442808	+	12376	1748	10628	5	16.762	15.6677	2.02512	2.07824	0.107222	2.98816	0.581381	0.418619	52	172	0.30215	-0.690058	TRUE	mature_mRNA_like
Ctrl_SERIPH1st_1	Ctrl_Conv1st	ENSG00000241563.4	CORT	chr1	10450030	10451998	+	1968	914	1054	1	3.12473	2.4112	0.077799	0.077799	0.0235574	4.18086			3	10	0.29703	3.79027	TRUE	mature_mRNA_like
Ctrl_SERIPH1st_1	Ctrl_Conv1st	ENSG00000160049.13	DFFA	chr1	10456521	10472549	-	16028	6690	9338	5	86.358	166.541	5.94035	2.70174	0.0642907	3.8393	1.46806	-0.468064	612	2135	0.286638	1.13456	TRUE	mature_mRNA_like
Ctrl_SERIPH1st_1	Ctrl_Conv1st	ENSG00000142655.14	PEX14	chr1	10472287	10630758	+	158471	2936	155535	11	50.8236	50.0423	1.74806	1.60011	0.0331879	4.78425	0.59345	0.40655	211	1409	0.149741	1.35055	TRUE	mature_mRNA_like
Ctrl_SERIPH1st_1	Ctrl_Conv1st	ENSG00000130940.15	CASZ1	chr1	10636603	10796650	-	160047	11336	148621	22	7.71348	6.32821	0.882446	0.775133	0.101478	2.99152	0.803025	0.196975	74	729	0.101495	2.1532	TRUE	mature_mRNA_like
Ctrl_SERIPH1st_1	Ctrl_Conv1st	ENSG00000175262.15	CIROZ	chr1	10946470	10982076	-	35606	3612	31994	11	0.16722	0	0	0	0	1.41803	0	1	0	2	0	0.646663	FALSE	low_coverage
Ctrl_SERIPH1st_1	Ctrl_Conv1st	ENSG00000120948.20	TARDBP	chr1	11012343	11030528	+	18185	7894	10276	8	118.077	48.0993	5.99056	3.7005	0.0482458	4.27823	0.651257	0.348743	902	3322	0.271515	-1.41076	TRUE	mature_mRNA_like
Ctrl_SERIPH1st_1	Ctrl_Conv1st	ENSG00000009724.19	MASP2	chr1	11022008	11047241	-	25233	5175	19975	11	0.635169	0	0.0483605	0	0.0617213	2.30897	1.58585	-0.585846	2	16	0.124224	-2.27662	FALSE	low_coverage
Ctrl_SERIPH1st_1	Ctrl_Conv1st	ENSG00000116649.11	SRM	chr1	11054583	11060053	-	5470	1927	3369	4	587.71	765.026	7.1401	5.65779	0.0120012	6.3432	0.663344	0.336656	2919	3864	0.755415	2.04015	TRUE	mature_mRNA_like
Ctrl_SERIPH1st_1	Ctrl_Conv1st	ENSG00000230337.5	EXOSC10-AS1	chr1	11060227	11102105	+	41878	6588	35290	5	2.28218	1.99382	0.237801	0.829858	0.0907646	2.81803	0.673911	0.326089	11	78	0.140845	0.0454282	TRUE	mature_mRNA_like
Ctrl_SERIPH1st_1	Ctrl_Conv1st	ENSG00000171824.15	EXOSC10	chr1	11066612	11099898	-	33286	6194	27028	22	88.1292	144.791	3.74586	1.76673	0.0407269	4.51988	0.91713	0.0828699	1627	2162	0.752509	-0.405998	TRUE	mature_mRNA_like
Ctrl_SERIPH1st_1	Ctrl_Conv1st	ENSG00000198793.15	MTOR	chr1	11106530	11262556	-	156026	13486	142323	56	69.5816	85.5515	2.39399	2.0277	0.033215	4.80425	0.566731	0.433269	2491	4265	0.584043	0.337965	TRUE	mature_mRNA_like
Ctrl_SERIPH1st_1	Ctrl_Conv1st	ENSG00000225602.5	MTOR-AS1	chr1	11143897	11149537	+	5640	763	4877	4	0.225426	0	0.13656	0.0145365	0.295593	0.460125	1.4278	-0.427796	2	3	0.645161	-2.39702	FALSE	low_coverage
Ctrl_SERIPH1st_1	Ctrl_Conv1st	ENSG00000171819.5	ANGPTL7	chr1	11189354	11195981	+	6627	2224	4403	4	0	0	0	0	0	0	0	1	0	0	0	0	FALSE	low_coverage
Ctrl_SERIPH1st_1	Ctrl_Conv1st	ENSG00000120942.14	UBIAD1	chr1	11273197	11296049	+	22852	5090	17762	4	41.4737	10.706	3.50738	3.19452	0.0778016	3.52665	0.0781293	0.921871	74	925	0.0799914	-1.69074	TRUE	mature_mRNA_like
Ctrl_SERIPH1st_1	Ctrl_Conv1st	ENSG00000204624.9	DISP3	chr1	11478904	11537583	+	58679	6452	52163	22	0.24907	0	0.0709508	0	0.168922	1.02994	0.868038	0.131962	7	18	0.38674	-4.02853e-05	FALSE	low_coverage
Ctrl_SERIPH1st_1	Ctrl_Conv1st	ENSG00000116661.12	FBXO2	chr1	11637017	11655785	-	18768	3391	15377	9	0.547331	0	0.0392792	0	0.0572075	2.21652	1.45808	-0.458084	5	9	0.549451	-0.927237	FALSE	low_coverage
Ctrl_SERIPH1st_1	Ctrl_Conv1st	ENSG00000132879.15	FBXO44	chr1	11650617	11663327	+	12710	4331	8296	5	10.1676	11.4167	0.727459	1.55314	0.0661622	3.63327	0.816426	0.183574	60	167	0.359066	6.32605	TRUE	mature_mRNA_like
Ctrl_SERIPH1st_1	Ctrl_Conv1st	ENSG00000116670.18	MAD2L2	chr1	11657229	11692605	-	35376	7914	27279	9	19.963	0.785714	0.591298	0.38824	0.0286283	4.85909	1.046	-0.0460038	407	581	0.700396	1.85099	TRUE	mature_mRNA_like
Ctrl_SERIPH1st_1	Ctrl_Conv1st	ENSG00000116663.12	FBXO6	chr1	11664188	11674354	+	10166	2147	8019	6	4.38891	4.95848	0.180072	0.0556375	0.0385677	4.0025	1.06351	-0.0635099	18	36	0.498615	4.19075	TRUE	mature_mRNA_like
Ctrl_SERIPH1st_1	Ctrl_Conv1st	ENSG00000162490.8	DRAXIN	chr1	11690957	11725857	+	34900	7964	26936	8	0.492843	0.466529	0.056059	0	0.0863905	1.92556	0.513201	0.486799	3	18	0.165746	1.13057	FALSE	low_coverage
Ctrl_SERIPH1st_1	Ctrl_Conv1st	ENSG00000177674.17	AGTRAP	chr1	11736083	11754802	+	18719	2435	16284	6	40.7101	22.9079	4.11864	3.47698	0.0916707	3.27407	0.469442	0.530558	119	554	0.214763	1.18394	TRUE	mature_mRNA_like
Ctrl_SERIPH1st_1	Ctrl_Conv1st	ENSG00000215910.8	C1orf167	chr1	11761786	11789585	+	27799	6695	21104	20	0.149963	0	0.00905042	0	0.0349419	1.19672	0.710973	0.289027	1	4	0.243902	-0.424176	FALSE	low_coverage
Ctrl_SERIPH1st_1	Ctrl_Conv1st	ENSG00000177553.6	C1orf167-AS1	chr1	11777076	11779619	-	2543	1868	675	2	0	0	0	0	0	0	0	1	0	0	0	0	FALSE	low_coverage
Ctrl_SERIPH1st_1	Ctrl_Conv1st	ENSG00000177000.14	MTHFR	chr1	11785722	11806455	-	20733	11534	9147	10	8.16941	9.34697	1.74232	0.392519	0.174028	2.16626	1.5293	-0.529296	72	369	0.195069	0.430516	TRUE	partially_spliced
Ctrl_SERIPH1st_1	Ctrl_Conv1st	ENSG00000011021.24	CLCN6	chr1	11806095	11848079	+	41984	8233	33571	26	10.9513	10.2126	2.50984	2.49578	0.185076	2.08218	0.61308	0.38692	122	585	0.208511	1.02562	TRUE	partially_spliced
Ctrl_SERIPH1st_1	Ctrl_Conv1st	ENSG00000175206.12	NPPA	chr1	11845708	11848345	-	2637	1120	1517	3	0	0	0	0	0	0	0	1	0	0	0	0	FALSE	low_coverage
Ctrl_SERIPH1st_1	Ctrl_Conv1st	ENSG00000120937.10	NPPB	chr1	11857463	11858976	-	1513	739	774	2	0	0	0	0	0	0	0	1	0	0	0	0	FALSE	low_coverage
Ctrl_SERIPH1st_1	Ctrl_Conv1st	ENSG00000116685.18	KIAA2013	chr1	11919590	11926428	-	6838	3281	3557	2	90.434	73.2318	13.7068	13.3186	0.131491	2.71308	0.810172	0.189828	203	1151	0.176353	0.506922	TRUE	mature_mRNA_like
Ctrl_SERIPH1st_1	Ctrl_Conv1st	ENSG00000083444.18	PLOD1	chr1	11934204	11975542	+	41338	5618	35645	21	58.5983	78.7012	2.38544	1.5843	0.039052	4.56174	0.758772	0.241228	771	1382	0.557847	1.94198	TRUE	mature_mRNA_like
Ctrl_SERIPH1st_1	Ctrl_Conv1st	ENSG00000116688.19	MFN2	chr1	11980180	12015211	+	35031	12200	22677	25	62.74	38.3788	2.64396	2.67805	0.0403756	4.51735	0.713076	0.286924	1431	2757	0.519024	2.0886	TRUE	mature_mRNA_like
Ctrl_SERIPH1st_1	Ctrl_Conv1st	ENSG00000116691.12	MIIP	chr1	12019465	12032046	+	12581	3242	9256	6	33.814	37.0033	2.78544	1.39351	0.0758986	3.55502	0.581017	0.418983	242	453	0.534098	0.845008	TRUE	mature_mRNA_like
Ctrl_SERIPH1st_1	Ctrl_Conv1st	ENSG00000120949.15	TNFRSF8	chr1	12063302	12144207	+	80905	3812	77093	14	0.9617	0.638298	0.0204558	0	0.0189028	3.1398	0.336471	0.663529	9	18	0.497238	1.27114	FALSE	low_coverage
Ctrl_SERIPH1st_1	Ctrl_Conv1st	ENSG00000028137.20	TNFRSF1B	chr1	12166976	12209228	+	42252	4008	38244	11	0	0	0	0	0	0	0	1	0	0	0	0	FALSE	low_coverage
Ctrl_SERIPH1st_1	Ctrl_Conv1st	ENSG00000048707.15	VPS13D	chr1	12230029	12512047	+	282018	20768	261233	76	23.2511	28.0226	1.07419	0.78394	0.0439787	4.31375	0.762938	0.237062	930	2548	0.364978	-1.03894	TRUE	mature_mRNA_like
Ctrl_SERIPH1st_1	Ctrl_Conv1st	ENSG00000162496.11	DHRS3	chr1	12567908	12620133	-	52225	5881	46344	10	6.69614	4.03893	0.98386	0.663874	0.12646	2.64854	0.96216	0.0378398	63	284	0.221753	-0.41627	TRUE	mature_mRNA_like
Ctrl_SERIPH1st_1	Ctrl_Conv1st	ENSG00000204518.3	AADACL4	chr1	12644084	12667076	+	22992	2027	20965	3	0	0	0	0	0	0	0	1	0	0	0	0	FALSE	low_coverage
Ctrl_SERIPH1st_1	Ctrl_Conv1st	ENSG00000188984.12	AADACL3	chr1	12716109	12728760	+	12651	4055	8596	3	0	0	0	0	0	0	0	1	0	0	0	0	FALSE	low_coverage
Ctrl_SERIPH1st_1	Ctrl_Conv1st	ENSG00000157330.10	CFAP107	chr1	12746199	12763699	+	17500	4133	13367	4	0	0	0	0	0	0	0	1	0	0	0	0	FALSE	low_coverage
Ctrl_SERIPH1st_1	Ctrl_Conv1st	ENSG00000116726.5	PRAMEF12	chr1	12773737	12777906	+	4169	2889	1280	2	0	0	0	0	0	0	0	1	0	0	0	0	FALSE	low_coverage
Ctrl_SERIPH1st_1	Ctrl_Conv1st	ENSG00000116721.9	PRAMEF1	chr1	12791396	12796628	+	5232	2439	2793	4	0	0	0	0	0	0	0	1	0	0	0	0	FALSE	low_coverage
Ctrl_SERIPH1st_1	Ctrl_Conv1st	ENSG00000239810.3	PRAMEF11	chr1	12824604	12831410	-	6806	1845	4961	3	0	0	0	0	0	0	0	1	0	0	0	0	FALSE	low_coverage
Ctrl_SERIPH1st_1	Ctrl_Conv1st	ENSG00000179172.10	HNRNPCL1	chr1	12847376	12848720	-	1344	1134	210	1	0	0	0	0	0	0			0	0	0	0	FALSE	low_coverage
Ctrl_SERIPH1st_1	Ctrl_Conv1st	ENSG00000120952.4	PRAMEF2	chr1	12857085	12861909	+	4824	1642	3182	3	0	0	0	0	0	0	0	1	0	0	0	0	FALSE	low_coverage
Ctrl_SERIPH1st_1	Ctrl_Conv1st	ENSG00000243073.4	PRAMEF4	chr1	12879211	12886201	-	6990	1840	5150	3	0	0	0	0	0	0	0	1	0	0	0	0	FALSE	low_coverage
Ctrl_SERIPH1st_1	Ctrl_Conv1st	ENSG00000187545.6	PRAMEF10	chr1	12892249	12898270	-	6021	2358	3663	3	0	0	0	0	0	0	0	1	0	0	0	0	FALSE	low_coverage
Ctrl_SERIPH1st_1	Ctrl_Conv1st	ENSG00000204510.6	PRAMEF7	chr1	12916609	12920751	+	4142	1909	2233	3	0	0	0	0	0	0	0	1	0	0	0	0	FALSE	low_coverage
Ctrl_SERIPH1st_1	Ctrl_Conv1st	ENSG00000232423.6	PRAMEF6	chr1	12938471	12947580	-	9109	1784	7325	4	0	0	0	0	0	0	0	1	0	0	0	0	FALSE	low_coverage
Ctrl_SERIPH1st_1	Ctrl_Conv1st	ENSG00000274764.6	PRAMEF27	chr1	13049475	13056575	-	7100	1947	5153	3	0	0	0	0	0	0	0	1	0	0	0	0	FALSE	low_coverage
Ctrl_SERIPH1st_1	Ctrl_Conv1st	ENSG00000277058.3	HNRNPCL3	chr1	13060768	13062878	+	2110	1897	213	1	0	0	0	0	0	0			0	0	0	0	FALSE	low_coverage
Ctrl_SERIPH1st_1	Ctrl_Conv1st	ENSG00000229571.7	PRAMEF25	chr1	13068676	13077884	+	9208	1997	7211	4	0	0	0	0	0	0	0	1	0	0	0	0	FALSE	low_coverage
Ctrl_SERIPH1st_1	Ctrl_Conv1st	ENSG00000275774.3	HNRNPCL2	chr1	13115487	13116854	-	1367	1156	211	1	0	0	0	0	0	0			0	0	0	0	FALSE	low_coverage
Ctrl_SERIPH1st_1	Ctrl_Conv1st	ENSG00000290772.2	PRAMEF36P	chr1	13127072	13132099	+	5027	2035	2992	3	0	0	0	0	0	0	0	1	0	0	0	0	FALSE	low_coverage
Ctrl_SERIPH1st_1	Ctrl_Conv1st	ENSG00000280267.7	PRAMEF26	chr1	13148904	13158116	-	9212	2433	6779	4	0	0	0	0	0	0	0	1	0	0	0	0	FALSE	low_coverage
Ctrl_SERIPH1st_1	Ctrl_Conv1st	ENSG00000179412.11	HNRNPCL4	chr1	13163913	13165631	-	1718	1718			0	0							0	0	0	0	FALSE	low_coverage
Ctrl_SERIPH1st_1	Ctrl_Conv1st	ENSG00000204505.5	PRAMEF9	chr1	13171847	13179459	+	7612	2465	5147	3	0	0	0	0	0	0	0	1	0	0	0	0	FALSE	low_coverage
Ctrl_SERIPH1st_1	Ctrl_Conv1st	ENSG00000279169.3	PRAMEF13	chr1	13196187	13201409	-	5222	2442	2780	4	0	0	0	0	0	0	0	1	0	0	0	0	FALSE	low_coverage
Ctrl_SERIPH1st_1	Ctrl_Conv1st	ENSG00000279804.3	PRAMEF18	chr1	13222694	13226154	-	3460	2125	1335	2	0	0	0	0	0	0	0	1	0	0	0	0	FALSE	low_coverage
Ctrl_SERIPH1st_1	Ctrl_Conv1st	ENSG00000270601.5	PRAMEF5	chr1	13254197	13263435	+	9238	1855	7383	3	0	0	0	0	0	0	0	1	0	0	0	0	FALSE	low_coverage
Ctrl_SERIPH1st_1	Ctrl_Conv1st	ENSG00000182330.11	PRAMEF8	chr1	13281303	13285137	-	3834	1611	2223	3	0	0	0	0	0	0	0	1	0	0	0	0	FALSE	low_coverage
Ctrl_SERIPH1st_1	Ctrl_Conv1st	ENSG00000237700.2	PRAMEF33	chr1	13303538	13308907	+	5369	1518	3851	3	0	0	0	0	0	0	0	1	0	0	0	0	FALSE	low_coverage
Ctrl_SERIPH1st_1	Ctrl_Conv1st	ENSG00000204501.7	PRAMEF15	chr1	13315580	13322598	+	7018	1865	5153	3	0	0	0	0	0	0	0	1	0	0	0	0	FALSE	low_coverage
Ctrl_SERIPH1st_1	Ctrl_Conv1st	ENSG00000204481.8	PRAMEF14	chr1	13341891	13347134	-	5243	2443	2800	4	0	0	0	0	0	0	0	1	0	0	0	0	FALSE	low_coverage
Ctrl_SERIPH1st_1	Ctrl_Conv1st	ENSG00000204480.9	PRAMEF19	chr1	13368430	13371947	-	3517	2123	1394	2	0	0	0	0	0	0	0	1	0	0	0	0	FALSE	low_coverage
Ctrl_SERIPH1st_1	Ctrl_Conv1st	ENSG00000204479.4	PRAMEF17	chr1	13389631	13392629	+	2998	1578	1420	2	0	0	0	0	0	0	0	1	0	0	0	0	FALSE	low_coverage
Ctrl_SERIPH1st_1	Ctrl_Conv1st	ENSG00000204478.11	PRAMEF20	chr1	13410449	13421328	+	10879	1597	9282	3	0	0	0	0	0	0	0	1	0	0	0	0	FALSE	low_coverage
Ctrl_SERIPH1st_1	Ctrl_Conv1st	ENSG00000162494.6	LRRC38	chr1	13474972	13514003	-	39031	2168	36863	1	0	0	0.008192	0.008192	0.0757172	-0.113594			0	1	0	0	FALSE	low_coverage
Ctrl_SERIPH1st_1	Ctrl_Conv1st	ENSG00000162493.18	PDPN	chr1	13583464	13617957	+	34493	3707	30708	7	37.0313	43.0794	1.49	1.22273	0.0385798	4.54553	0.684693	0.315307	171	612	0.279366	1.84549	TRUE	mature_mRNA_like
Ctrl_SERIPH1st_1	Ctrl_Conv1st	ENSG00000116731.23	PRDM2	chr1	13700187	13825079	+	124892	10933	113959	14	29.4507	4.40741	1.95596	1.1308	0.0620807	3.84531	0.709041	0.290959	66	1821	0.0362418	0.784024	TRUE	mature_mRNA_like
Ctrl_SERIPH1st_1	Ctrl_Conv1st	ENSG00000189337.17	KAZN	chr1	13892791	15118043	+	1225252	13860	1211392	19	9.25433	0.952084	0.2913	0.369198	0.0302002	4.57929	1.03866	-0.0386629	99	1608	0.0615633	3.20548	TRUE	mature_mRNA_like
Ctrl_SERIPH1st_1	Ctrl_Conv1st	ENSG00000234593.4	KAZN-AS1	chr1	14338824	14419973	-	81149	3313	77836	7	0	0	0	0	0	0	0	1	0	0	0	0	FALSE	low_coverage
Ctrl_SERIPH1st_1	Ctrl_Conv1st	ENSG00000175147.13	TMEM51-AS1	chr1	15111814	15153618	-	41804	11973	29831	4	0.771319	0.811419	0.420938	0.383453	0.325739	0.742089	0.48414	0.51586	0	73	0	-0.35259	TRUE	unclassified
Ctrl_SERIPH1st_1	Ctrl_Conv1st	ENSG00000171729.15	TMEM51	chr1	15152497	15220484	+	67987	3429	64558	5	8.40828	5.4362	1.62251	1.30996	0.160156	2.30436	0.246563	0.753437	9	447	0.0201297	0.106335	TRUE	unclassified
Ctrl_SERIPH1st_1	Ctrl_Conv1st	ENSG00000204464.8	TMEM51-AS2	chr1	15164190	15171666	-	7476	928	6548	3	0	0	0.138363	0.078401	0.580471	-1.25316	0.500225	0.499775	0	3	0	-0.65381	FALSE	low_coverage
Ctrl_SERIPH1st_1	Ctrl_Conv1st	ENSG00000142621.22	FHAD1	chr1	15236520	15400283	+	163763	13296	150467	42	0.887259	0	0.277722	0.205984	0.219546	1.3861	0.791987	0.208013	15	179	0.0837521	-0.713842	TRUE	unclassified
Ctrl_SERIPH1st_1	Ctrl_Conv1st	ENSG00000228140.3	EFHD2-AS1	chr1	15316843	15411229	-	94386	9279	85107	8	0.0325466	0	0.0106457	0	0.0743455	0.260552	0.0485132	0.951487	0	4	0	-0.400509	FALSE	low_coverage
Ctrl_SERIPH1st_1	Ctrl_Conv1st	ENSG00000233485.2	FHAD1-AS1	chr1	15326679	15343890	-	17211	3704	13507	5	0	0	0	0	0	0	0	1	0	0	0	0	FALSE	low_coverage
Ctrl_SERIPH1st_1	Ctrl_Conv1st	ENSG00000142634.14	EFHD2	chr1	15409848	15430339	+	20491	2573	17918	4	95.541	88.0203	1.6292	2.29212	0.0167492	5.78945	0.628498	0.371502	138	916	0.150639	2.70013	TRUE	mature_mRNA_like
Ctrl_SERIPH1st_1	Ctrl_Conv1st	ENSG00000162438.12	CTRC	chr1	15438441	15449242	+	10801	3483	7318	7	0.0445019	0	0.0612188	0	0.297582	-0.157932	0.449703	0.550297	0	2	0	-0.950167	FALSE	low_coverage
Ctrl_SERIPH1st_1	Ctrl_Conv1st	ENSG00000142615.9	CELA2A	chr1	15456727	15472091	+	15364	1519	13845	7	0	0	0	0	0	0	0	1	0	0	0	0	FALSE	low_coverage
Ctrl_SERIPH1st_1	Ctrl_Conv1st	ENSG00000215704.10	CELA2B	chr1	15465908	15491395	+	25487	1449	24038	10	0	0	0	0	0	0	0	1	0	0	0	0	FALSE	low_coverage
Ctrl_SERIPH1st_1	Ctrl_Conv1st	ENSG00000132906.19	CASP9	chr1	15490831	15526534	-	35703	5269	30434	11	10.142	5.80222	0.788329	0.74359	0.0714695	3.52725	0.723686	0.276314	69	261	0.264267	1.06618	TRUE	mature_mRNA_like
Ctrl_SERIPH1st_1	Ctrl_Conv1st	ENSG00000116138.14	DNAJC16	chr1	15526812	15592379	+	65567	8563	56922	17	17.5809	26.8092	0.961737	0.881814	0.0515881	4.05769	0.986613	0.0133873	196	685	0.28609	-3.52588	TRUE	mature_mRNA_like
Ctrl_SERIPH1st_1	Ctrl_Conv1st	ENSG00000116771.7	AGMAT	chr1	15571698	15585078	-	13380	3122	10258	6	0.676169	1	0.0588807	0	0.0705116	2.28843	0.973094	0.0269056	4	9	0.43956	0.19887	FALSE	low_coverage
Ctrl_SERIPH1st_1	Ctrl_Conv1st	ENSG00000197312.13	DDI2	chr1	15617457	15669044	+	51587	12178	39409	9	66.917	78.9336	2.96744	2.27122	0.0424015	4.44942	0.559477	0.440523	388	3112	0.124675	2.46813	TRUE	mature_mRNA_like
Ctrl_SERIPH1st_1	Ctrl_Conv1st	ENSG00000215695.2	RSC1A1	chr1	15659712	15662033	+	2321	2321			109.922	109.922							99	898	0.110233	0.0823735	TRUE	unclassified
Ctrl_SERIPH1st_1	Ctrl_Conv1st	ENSG00000116786.16	PLEKHM2	chr1	15681460	15734769	+	53309	5197	48030	21	58.6702	84.0301	1.70581	2.6779	0.0282064	5.02437	0.808247	0.191753	638	1291	0.494152	3.43787	TRUE	mature_mRNA_like
Ctrl_SERIPH1st_1	Ctrl_Conv1st	ENSG00000162461.9	SLC25A34	chr1	15736175	15741392	+	5217	3420	1699	4	0.18421	0	0.695704	0	0.709964	-1.48527	1.32117	-0.321169	0	6	0	-0.981036	FALSE	low_coverage
Ctrl_SERIPH1st_1	Ctrl_Conv1st	ENSG00000224459.3	SLC25A34-AS1	chr1	15739758	15749896	-	10138	987	9151	2	0	0	0	0	0	0	0	1	0	0	0	0	FALSE	low_coverage
Ctrl_SERIPH1st_1	Ctrl_Conv1st	ENSG00000162460.8	TMEM82	chr1	15742498	15747982	+	5484	1443	4041	5	0	0	0	0	0	0	0	1	0	0	0	0	FALSE	low_coverage
Ctrl_SERIPH1st_1	Ctrl_Conv1st	ENSG00000162458.14	FBLIM1	chr1	15756603	15786594	+	29991	5617	24346	11	6.9295	3.77656	0.542225	0.49142	0.0716118	3.45227	0.608688	0.391312	37	175	0.211308	1.87524	TRUE	mature_mRNA_like
Ctrl_SERIPH1st_1	Ctrl_Conv1st	ENSG00000179743.5	SPEN-AS1	chr1	15770782	15848147	-	77365	8243	69122	13	7.1793	0	1.09551	0	0.13081	2.60617	1.79875	-0.79875	0	455	0	-5.43679	TRUE	mature_mRNA_like
Ctrl_SERIPH1st_1	Ctrl_Conv1st	ENSG00000233954.7	UQCRHL	chr1	15807168	15809348	-	2180	2180			1.07982	1.07982							0	8	0	2.52687	TRUE	unclassified
Ctrl_SERIPH1st_1	Ctrl_Conv1st	ENSG00000065526.13	SPEN	chr1	15836094	15940456	+	104362	15120	89242	15	209.3	187.051	5.22895	5.36015	0.0243627	5.29627	0.630453	0.369547	1539	12124	0.126937	4.05926	TRUE	mature_mRNA_like
Ctrl_SERIPH1st_1	Ctrl_Conv1st	ENSG00000116809.13	ZBTB17	chr1	15940402	15976132	-	35730	7423	27907	12	10.8378	4.47892	1.35851	1.38685	0.110481	2.90675	0.726461	0.273539	162	395	0.410023	2.55786	TRUE	mature_mRNA_like
Ctrl_SERIPH1st_1	Ctrl_Conv1st	ENSG00000183888.4	SRARP	chr1	16004235	16008807	+	4572	3039	1533	1	0	0	0	0	0	0			0	0	0	0	FALSE	low_coverage
Ctrl_SERIPH1st_1	Ctrl_Conv1st	ENSG00000173641.19	HSPB7	chr1	16014027	16020597	-	6570	3449	3121	3	0.262685	0.0455	0	0	0	1.85872	0	1	0	3	0	2.36035	FALSE	low_coverage
Ctrl_SERIPH1st_1	Ctrl_Conv1st	ENSG00000186510.13	CLCNKA	chr1	16018145	16034109	+	15964	5187	10540	22	0.00886832	0	0.0241935	0	0.181822	-0.190006	0.633158	0.366842	0	1	0	-0.70368	FALSE	low_coverage
Ctrl_SERIPH1st_1	Ctrl_Conv1st	ENSG00000184908.21	CLCNKB	chr1	16040251	16057367	+	17116	6921	10097	22	0.436931	0	0.112905	0	0.173744	1.33453	0.820774	0.179226	7	15	0.463576	2.59723	FALSE	low_coverage
Ctrl_SERIPH1st_1	Ctrl_Conv1st	ENSG00000185519.10	FAM131C	chr1	16057768	16073651	-	15883	1720	14163	6	1.58023	2.35931	0.259055	0	0.133583	2.22638	0.818397	0.181603	8	23	0.34632	0.304518	TRUE	mature_mRNA_like
Ctrl_SERIPH1st_1	Ctrl_Conv1st	ENSG00000142627.14	EPHA2	chr1	16124336	16156069	-	31733	4156	27488	16	10.307	9.70224	0.364013	0.0044645	0.0337956	4.48725	1.13925	-0.139249	59	176	0.335037	0.891391	TRUE	mature_mRNA_like
Ctrl_SERIPH1st_1	Ctrl_Conv1st	ENSG00000227959.3	EPHA2-AS1	chr1	16155071	16183148	+	28077	4422	23655	6	0.264812	0	0.141323	0.076722	0.27922	0.596189	0.871352	0.128648	0	15	0	-1.13905	FALSE	low_coverage
Ctrl_SERIPH1st_1	Ctrl_Conv1st	ENSG00000142632.18	ARHGEF19	chr1	16197853	16212893	-	15040	7447	7421	11	0.702162	1.3398	0.475542	0	0.372185	0.478971	1.48923	-0.489233	11	29	0.378007	3.13774	TRUE	partially_spliced
Ctrl_SERIPH1st_1	Ctrl_Conv1st	ENSG00000132881.13	CPLANE2	chr1	16231691	16237183	-	5492	1673	3819	4	17.9402	16.6667	0.960723	0.29344	0.0505618	4.0881	1.27854	-0.278538	54	117	0.461144	0.88532	TRUE	mature_mRNA_like
Ctrl_SERIPH1st_1	Ctrl_Conv1st	ENSG00000037637.12	FBXO42	chr1	16246839	16352487	-	105648	9938	95669	13	15.0531	13.8412	1.40905	1.0147	0.0850761	3.32791	0.900469	0.0995306	159	952	0.166999	1.53721	TRUE	mature_mRNA_like
Ctrl_SERIPH1st_1	Ctrl_Conv1st	ENSG00000055070.18	SZRD1	chr1	16352574	16398147	+	45573	4791	40782	9	164.246	3.86857	2.41322	3.63775	0.0144713	6.03106	0.739239	0.260761	594	2954	0.201076	7.89623	TRUE	mature_mRNA_like
Ctrl_SERIPH1st_1	Ctrl_Conv1st	ENSG00000187144.11	SPATA21	chr1	16387116	16437424	-	50308	4506	45718	20	0.030182	0	0.00872736	0	0.0628277	0.259815	0.382699	0.617301	1	3	0.322581	0.363145	FALSE	low_coverage
Ctrl_SERIPH1st_1	Ctrl_Conv1st	ENSG00000157191.21	NECAP2	chr1	16440706	16460081	+	19375	5527	13763	7	31.9669	54.7891	2.69876	2.86523	0.0776271	3.51823	0.428683	0.571317	211	717	0.294241	1.81122	TRUE	mature_mRNA_like
Ctrl_SERIPH1st_1	Ctrl_Conv1st	ENSG00000290842.2	CROCCP3	chr1	16458752	16499257	-	40505	7604	32737	15	3.88243	3.5012	1.75954	1.34688	0.306435	1.0987	0.815612	0.184388	19	294	0.0646039	0.724363	TRUE	unclassified
Ctrl_SERIPH1st_1	Ctrl_Conv1st	ENSG00000219481.11	NBPF1	chr1	16562318	16613562	-	51244	12212	39032	32	13.521	11.274	2.2715	1.11108	0.142928	2.52197	2.20606	-1.20606	224	857	0.261346	-3.49882	TRUE	mature_mRNA_like
Ctrl_SERIPH1st_1	Ctrl_Conv1st	ENSG00000058453.18	CROCC	chr1	16740272	16972964	+	232692	9016	223425	35	5.8049	4.96774	0.445107	0.668203	0.0700954	3.4373	1.15859	-0.158588	116	508	0.228302	3.54571	TRUE	mature_mRNA_like
Ctrl_SERIPH1st_1	Ctrl_Conv1st	ENSG00000117122.15	MFAP2	chr1	16974497	16981616	-	7119	3792	3327	10	12.7276	3.85629	0.323715	0	0.0246147	4.92001	1.78291	-0.782913	77	164	0.469226	4.47063	TRUE	mature_mRNA_like
Ctrl_SERIPH1st_1	Ctrl_Conv1st	ENSG00000159363.19	ATP13A2	chr1	16985957	17011928	-	25971	5253	20283	21	78.7213	82.5519	2.49204	1.14667	0.0306473	4.92643	1.09297	-0.0929662	1025	1547	0.66253	1.75204	TRUE	mature_mRNA_like
Ctrl_SERIPH1st_1	Ctrl_Conv1st	ENSG00000117118.13	SDHB	chr1	17018663	17054151	-	35488	3071	32284	10	89.7564	49.315	3.87935	4.06653	0.041386	4.49702	0.385796	0.614204	874	1337	0.653653	1.20509	TRUE	mature_mRNA_like
Ctrl_SERIPH1st_1	Ctrl_Conv1st	ENSG00000117115.14	PADI2	chr1	17066760	17119459	-	52699	6122	46480	15	2.20124	2.48077	0.0652108	0	0.0275563	3.80003	0.66578	0.33422	19	55	0.344828	1.91529	TRUE	mature_mRNA_like
Ctrl_SERIPH1st_1	Ctrl_Conv1st	ENSG00000142623.11	PADI1	chr1	17205127	17246007	+	40880	4903	35977	14	0	0	0.00839443	0	0.0774433	-0.116291	0.0452313	0.954769	0	1	0	-0.317594	FALSE	low_coverage
Ctrl_SERIPH1st_1	Ctrl_Conv1st	ENSG00000142619.4	PADI3	chr1	17249097	17284233	+	35136	3189	31863	14	0.186892	0	0.0284343	0	0.090174	1.15948	0.445012	0.554988	1	5	0.196078	0.894853	FALSE	low_coverage
Ctrl_SERIPH1st_1	Ctrl_Conv1st	ENSG00000159339.13	PADI4	chr1	17308194	17364004	+	55810	2971	52839	17	0	0	0	0	0	0	0	1	0	0	0	0	FALSE	low_coverage
Ctrl_SERIPH1st_1	Ctrl_Conv1st	ENSG00000276747.1	PADI6	chr1	17372195	17401699	+	29504	2396	27108	15	0	0	0	0	0	0	0	1	0	0	0	0	FALSE	low_coverage
Ctrl_SERIPH1st_1	Ctrl_Conv1st	ENSG00000179051.15	RCC2	chr1	17406754	17439772	-	33018	4343	28675	12	476.998	552.987	13.8881	13.1584	0.0282862	5.09201	0.535889	0.464111	2177	8246	0.264004	3.73742	TRUE	mature_mRNA_like
Ctrl_SERIPH1st_1	Ctrl_Conv1st	ENSG00000227751.1	RCC2-AS1	chr1	17406759	17407382	+	623	311	312	1	0.575563	0.365306	0.394231	0.394231	0.368511	0.450904			0	1	0	-2.09747	FALSE	low_coverage
Ctrl_SERIPH1st_1	Ctrl_Conv1st	ENSG00000074964.18	ARHGEF10L	chr1	17539367	17697876	+	158509	8508	150001	34	4.0536	4.99219	0.547576	0.50509	0.116477	2.68124	0.671516	0.328484	86	390	0.220456	0.621004	TRUE	mature_mRNA_like
Ctrl_SERIPH1st_1	Ctrl_Conv1st	ENSG00000117148.9	ACTL8	chr1	17755332	17827063	+	71731	2249	69482	6	0.939973	0	0.0130393	0	0.0123829	3.20165	0.0973099	0.90269	3	10	0.29703	0.431632	FALSE	low_coverage
Ctrl_SERIPH1st_1	Ctrl_Conv1st	ENSG00000117154.13	IGSF21	chr1	18107709	18378483	+	270774	3121	267653	10	0	0	0.00338129	0	0.032707	-0.0479752	0.0369505	0.96305	0	3	0	-0.000171565	FALSE	low_coverage
Ctrl_SERIPH1st_1	Ctrl_Conv1st	ENSG00000230035.3	IGSF21-AS1	chr1	18159970	18179346	-	19376	1228	18111	5	0	0	0	0	0	0	0	1	0	0	0	0	FALSE	low_coverage
Ctrl_SERIPH1st_1	Ctrl_Conv1st	ENSG00000179023.9	KLHDC7A	chr1	18480929	18485974	+	5045	5045			0.059861	0.059861							0	1	0	-1.58369	FALSE	low_coverage
Ctrl_SERIPH1st_1	Ctrl_Conv1st	ENSG00000009709.14	PAX7	chr1	18630845	18748876	+	118031	7565	110466	12	1.82221	1	0.197735	0.116058	0.0932739	2.69066	1.03834	-0.0383364	8	119	0.0671704	1.11946	TRUE	mature_mRNA_like
Ctrl_SERIPH1st_1	Ctrl_Conv1st	ENSG00000179002.6	TAS1R2	chr1	18839598	18859660	-	20062	2520	17542	5	0	0	0.0344315	0	0.256127	-0.426871	0.277828	0.722172	0	2	0	0	FALSE	low_coverage
Ctrl_SERIPH1st_1	Ctrl_Conv1st	ENSG00000159423.18	ALDH4A1	chr1	18871424	18902799	-	31375	4343	26952	15	7.62491	6.75532	0.928428	0.753117	0.107291	2.90908	0.818941	0.181059	48	194	0.247295	1.74609	TRUE	mature_mRNA_like
Ctrl_SERIPH1st_1	Ctrl_Conv1st	ENSG00000169991.12	IFFO2	chr1	18904279	18956676	-	52397	6242	46155	9	15.749	16.1142	1.05239	0.677015	0.0622666	3.78169	0.807536	0.192464	50	490	0.10202	1.50179	TRUE	mature_mRNA_like
Ctrl_SERIPH1st_1	Ctrl_Conv1st	ENSG00000127481.15	UBR4	chr1	19074509	19210266	-	135757	24661	110855	102	83.8402	113.193	2.83122	2.26262	0.0326285	4.83979	0.780483	0.219517	5518	7933	0.695567	0.190836	TRUE	mature_mRNA_like
Ctrl_SERIPH1st_1	Ctrl_Conv1st	ENSG00000230424.4	EMC1-AS1	chr1	19210329	19240709	+	30380	2046	28334	5	2.26931	1.3716	2.03727	2.22292	0.462325	0.148696	1.07843	-0.0784278	2	208	0.00961076	-2.67238	TRUE	unclassified
Ctrl_SERIPH1st_1	Ctrl_Conv1st	ENSG00000127463.17	EMC1	chr1	19215659	19251552	-	35893	15030	20679	16	31.8633	36	2.20161	2.0952	0.0644406	3.7957	0.516673	0.483327	841	1754	0.479448	1.57809	TRUE	mature_mRNA_like
Ctrl_SERIPH1st_1	Ctrl_Conv1st	ENSG00000053372.6	MRTO4	chr1	19251795	19260128	+	8333	2565	5768	7	161.365	182.256	7.05635	5.3579	0.0418721	4.49585	0.729803	0.270197	620	1541	0.40231	4.47897	TRUE	mature_mRNA_like
Ctrl_SERIPH1st_1	Ctrl_Conv1st	ENSG00000211454.16	AKR7L	chr1	19265981	19274194	-	8213	2768	5445	6	2.39162	1.84536	1.46428	1.26174	0.370151	0.671585	0.45236	0.54764	13	53	0.244821	0.31288	TRUE	pre_mRNA_like
Ctrl_SERIPH1st_1	Ctrl_Conv1st	ENSG00000162482.6	AKR7A3	chr1	19282495	19288823	-	6328	1411	4917	6	3.48831	2.26852	0.992068	0.883888	0.216591	1.71624	0.620958	0.379042	14	40	0.349127	1.30786	TRUE	partially_spliced
Ctrl_SERIPH1st_1	Ctrl_Conv1st	ENSG00000053371.14	AKR7A2	chr1	19301990	19312144	-	10154	3753	6401	6	57.2057	131.25	6.02406	4.55856	0.0951221	3.22612	0.70144	0.29856	392	855	0.458426	1.05079	TRUE	mature_mRNA_like
Ctrl_SERIPH1st_1	Ctrl_Conv1st	ENSG00000040487.14	SLC66A1	chr1	19312283	19329300	+	17017	2788	14229	9	22.2493	21.0139	1.67348	2.5	0.0696624	3.65557	0.862164	0.137836	83	288	0.288094	1.5141	TRUE	mature_mRNA_like
Ctrl_SERIPH1st_1	Ctrl_Conv1st	ENSG00000077549.20	CAPZB	chr1	19338774	19485600	-	146826	19251	127481	11	22.0807	10.6016	2.77897	2.45113	0.111338	2.94568	1.25565	-0.255648	555	2607	0.21288	1.52868	TRUE	mature_mRNA_like
Ctrl_SERIPH1st_1	Ctrl_Conv1st	ENSG00000173436.16	MICOS10	chr1	19484402	19629821	+	145419	5503	139916	9	22.9382	9.35503	1.03809	3.71116	0.0431168	4.33934	0.477623	0.522377	306	907	0.337339	4.54903	TRUE	mature_mRNA_like
Ctrl_SERIPH1st_1	Ctrl_Conv1st	ENSG00000235185.2	MICOS10-DT	chr1	19566700	19596873	-	30173	913	29260	4	0.100767	0	0.00717698	0	0.034514	0.905525	0.169998	0.830002	0	1	0	-0.415276	FALSE	low_coverage
Ctrl_SERIPH1st_1	Ctrl_Conv1st	ENSG00000158747.16	NBL1	chr1	19596978	19658456	+	61478	11254	50128	8	11.5435	2.96525	5.30843	0.55333	0.313145	1.10625	1.23648	-0.236475	369	1324	0.27868	0.049497	TRUE	partially_spliced
Ctrl_SERIPH1st_1	Ctrl_Conv1st	ENSG00000158748.4	HTR6	chr1	19664874	19680966	+	16092	3800	12292	2	0.397368	0.632324	0	0	0	2.31431	0	1	1	5	0.196078	2.04514	FALSE	low_coverage
Ctrl_SERIPH1st_1	Ctrl_Conv1st	ENSG00000162542.15	TMCO4	chr1	19682206	19800500	-	118294	7647	110647	23	1.36773	1.52806	0.405181	0.216753	0.216338	1.53871	0.798381	0.201619	15	185	0.0810373	-1.31442	TRUE	unclassified
Ctrl_SERIPH1st_1	Ctrl_Conv1st	ENSG00000178828.7	RNF186	chr1	19814028	19815283	-	1255	1255			0	0							0	0	0	0	FALSE	low_coverage
Ctrl_SERIPH1st_1	Ctrl_Conv1st	ENSG00000235434.2	RNF186-AS1	chr1	19814353	19819502	+	5149	460	4689	1	0	0	0	0	0	0			0	0	0	0	FALSE	low_coverage
Ctrl_SERIPH1st_1	Ctrl_Conv1st	ENSG00000169914.7	OTUD3	chr1	19882394	19912945	+	30551	6885	23666	8	27.5519	21.8297	3.69289	3.0293	0.117815	2.86601	0.37396	0.62604	65	929	0.0699602	2.05296	TRUE	mature_mRNA_like
Ctrl_SERIPH1st_1	Ctrl_Conv1st	ENSG00000188784.4	PLA2G2E	chr1	19920008	19923617	-	3609	785	2824	3	0	0	0	0	0	0	0	1	0	0	0	0	FALSE	low_coverage
Ctrl_SERIPH1st_1	Ctrl_Conv1st	ENSG00000188257.13	PLA2G2A	chr1	19975430	19980462	-	5032	2921	2111	2	0	0	0	0	0	0	0	1	0	0	0	0	FALSE	low_coverage
Ctrl_SERIPH1st_1	Ctrl_Conv1st	ENSG00000127472.12	PLA2G5	chr1	20028178	20091911	+	63733	9937	53715	15	0	0	0	0	0	0	0	1	0	0	0	0	FALSE	low_coverage
Ctrl_SERIPH1st_1	Ctrl_Conv1st	ENSG00000117215.15	PLA2G2D	chr1	20111938	20119566	-	7628	2681	4947	3	0.112644	0	0	0	0	1.08844	0	1	0	1	0	1.21372	FALSE	low_coverage
Ctrl_SERIPH1st_1	Ctrl_Conv1st	ENSG00000158786.5	PLA2G2F	chr1	20139322	20150381	+	11059	6438	4621	3	0	0	0	0	0	0	0	1	0	0	0	0	FALSE	low_coverage
Ctrl_SERIPH1st_1	Ctrl_Conv1st	ENSG00000187980.7	PLA2G2C	chr1	20161252	20186518	-	25266	3855	21411	5	0	0	0	0	0	0	0	1	0	0	0	0	FALSE	low_coverage
Ctrl_SERIPH1st_1	Ctrl_Conv1st	ENSG00000162543.7	UBXN10	chr1	20183292	20196050	+	12758	8696	4062	3	0	0	0	0	0	0	0	1	0	0	0	0	FALSE	low_coverage
Ctrl_SERIPH1st_1	Ctrl_Conv1st	ENSG00000158816.17	VWA5B1	chr1	20290874	20359534	+	68660	11181	57479	25	0.0540203	0	0.0682859	0	0.30717	-0.127794	1.08457	-0.0845651	0	15	0	0.931001	FALSE	low_coverage
Ctrl_SERIPH1st_1	Ctrl_Conv1st	ENSG00000162545.7	CAMK2N1	chr1	20482390	20486210	-	3820	2605	1215	2	4.75624	5.19158	0.373662	0.38331	0.0714473	3.35791	0.307008	0.692992	4	44	0.0907029	0.0115801	TRUE	mature_mRNA_like
Ctrl_SERIPH1st_1	Ctrl_Conv1st	ENSG00000090432.8	MUL1	chr1	20499444	20508151	-	8707	2431	6276	3	53.9223	54.5905	2.72435	1.27735	0.048009	4.25756	0.636876	0.363124	81	495	0.163603	2.26833	TRUE	mature_mRNA_like
Ctrl_SERIPH1st_1	Ctrl_Conv1st	ENSG00000183114.8	FAM43B	chr1	20552572	20555020	+	2448	2448			2.56209	2.56209							0	21	0	0.590202	TRUE	unclassified
Ctrl_SERIPH1st_1	Ctrl_Conv1st	ENSG00000158825.7	CDA	chr1	20588931	20618908	+	29977	1205	28772	5	1.62739	0.210894	0.0262408	0.027013	0.0149637	3.77434	0.134043	0.865957	2	9	0.21978	1.3256	TRUE	mature_mRNA_like
Ctrl_SERIPH1st_1	Ctrl_Conv1st	ENSG00000158828.9	PINK1	chr1	20633457	20651511	+	18054	4901	13153	5	40.6786	53.5224	1.70782	0.651564	0.0401969	4.49549	0.737836	0.262164	295	740	0.398595	1.10893	TRUE	mature_mRNA_like
Ctrl_SERIPH1st_1	Ctrl_Conv1st	ENSG00000117242.7	PINK1-AS	chr1	20642656	20652193	-	9537	4443	5094	2	20.205	3.06863	2.28563	2.23656	0.101176	3.0894	0.660427	0.339573	1	377	0.00265182	-5.37655	TRUE	mature_mRNA_like
Ctrl_SERIPH1st_1	Ctrl_Conv1st	ENSG00000244038.11	DDOST	chr1	20651766	20661544	-	9778	2721	6965	9	212.966	329.49	5.7921	2.76568	0.0264651	5.17638	0.588595	0.411405	1426	2073	0.687859	1.76621	TRUE	mature_mRNA_like
Ctrl_SERIPH1st_1	Ctrl_Conv1st	ENSG00000117245.14	KIF17	chr1	20664010	20718017	-	54007	4518	49425	16	4.79438	4.29484	0.497643	0.389862	0.0922925	3.03377	0.721862	0.278138	34	156	0.217809	0.214995	TRUE	mature_mRNA_like
Ctrl_SERIPH1st_1	Ctrl_Conv1st	ENSG00000189410.13	SH2D5	chr1	20719723	20732837	-	13114	5515	7442	8	5.82702	4.08889	2.23072	1.97898	0.273448	1.34653	0.44282	0.55718	14	165	0.0847971	1.52094	TRUE	unclassified
Ctrl_SERIPH1st_1	Ctrl_Conv1st	ENSG00000127483.21	HP1BP3	chr1	20739094	20787323	-	48229	11510	36719	13	47.9732	66.0046	4.77747	3.05301	0.0903956	3.30103	1.7461	-0.746102	628	2434	0.258001	0.357116	TRUE	mature_mRNA_like
Ctrl_SERIPH1st_1	Ctrl_Conv1st	ENSG00000075151.24	EIF4G3	chr1	20806291	21177285	-	370994	11885	359103	44	75.1639	95.4473	2.56947	1.83385	0.0330125	4.81733	0.587963	0.412037	1895	6084	0.311468	0.651403	TRUE	mature_mRNA_like
Ctrl_SERIPH1st_1	Ctrl_Conv1st	ENSG00000117298.16	ECE1	chr1	21217246	21345572	-	128326	7308	121018	24	43.4265	41.913	1.7263	1.19146	0.0381478	4.5749	0.516588	0.483412	417	1758	0.237188	1.49493	TRUE	mature_mRNA_like
Ctrl_SERIPH1st_1	Ctrl_Conv1st	ENSG00000231105.2	ECE1-AS1	chr1	21293289	21299874	+	6585	2579	4006	2	0.0604885	0	0	0	0	0.68247	0	1	0	2	0	-0.84018	FALSE	low_coverage
Ctrl_SERIPH1st_1	Ctrl_Conv1st	ENSG00000142794.20	NBPF3	chr1	21440098	21485005	+	44907	6841	38066	25	10.2313	12.5252	2.54666	1.26415	0.197754	1.96477	0.952313	0.0476872	126	558	0.225766	-0.237419	TRUE	partially_spliced
Ctrl_SERIPH1st_1	Ctrl_Conv1st	ENSG00000162551.15	ALPL	chr1	21509396	21578410	+	69014	2980	66034	13	2.39497	2.0412	0.109837	0	0.0421673	3.57168	0.698863	0.301137	18	49	0.366599	1.20474	TRUE	mature_mRNA_like
Ctrl_SERIPH1st_1	Ctrl_Conv1st	ENSG00000076864.22	RAP1GAP	chr1	21596214	21669846	-	73632	8908	64724	36	2.35317	2.94175	0.15478	0	0.0593494	3.26732	1.0144	-0.0144028	43	103	0.417071	2.20959	TRUE	mature_mRNA_like
Ctrl_SERIPH1st_1	Ctrl_Conv1st	ENSG00000090686.17	USP48	chr1	21678297	21783606	-	105309	9500	95809	29	21.8027	31.0146	2.26068	2.29123	0.0935578	3.21384	0.72014	0.27986	533	1421	0.375062	0.543275	TRUE	mature_mRNA_like
Ctrl_SERIPH1st_1	Ctrl_Conv1st	ENSG00000187942.12	LDLRAD2	chr1	21812264	21825225	+	12961	4494	8467	4	0	0	0	0	0	0	0	1	0	0	0	0	FALSE	low_coverage
Ctrl_SERIPH1st_1	Ctrl_Conv1st	ENSG00000142798.20	HSPG2	chr1	21822243	21937310	-	115067	18118	95300	79	11.2741	10.8092	0.582382	0	0.0487083	4.05904	1.45222	-0.452215	543	866	0.626948	1.75728	TRUE	mature_mRNA_like
Ctrl_SERIPH1st_1	Ctrl_Conv1st	ENSG00000219073.8	CELA3B	chr1	21977021	21998642	+	21621	1540	20081	10	0	0	0	0	0	0	0	1	0	0	0	0	FALSE	low_coverage
Ctrl_SERIPH1st_1	Ctrl_Conv1st	ENSG00000142789.20	CELA3A	chr1	22001656	22012542	+	10886	1226	9660	8	0	0	0	0	0	0	0	1	0	0	0	0	FALSE	low_coverage
Ctrl_SERIPH1st_1	Ctrl_Conv1st	ENSG00000285752.1	CDC42-AS1	chr1	22028316	22052927	-	24611	2574	22037	2	0	0	0.0137046	0.0072185	0.120528	-0.18529	0.0673251	0.932675	0	1	0	0	FALSE	low_coverage
Ctrl_SERIPH1st_1	Ctrl_Conv1st	ENSG00000070831.19	CDC42	chr1	22052626	22101360	+	48734	24538	24196	12	35.6008	5.02946	2.4135	2.48543	0.0633226	3.82819	0.377531	0.622469	1173	3116	0.376432	3.5507	TRUE	mature_mRNA_like
Ctrl_SERIPH1st_1	Ctrl_Conv1st	ENSG00000230068.2	CDC42-IT1	chr1	22059196	22064199	+	5003	692	4311	1	2.68064	2.85742	2.30967	2.30967	0.453739	0.206577			302	344	0.877652	1.68897	TRUE	partially_spliced
Ctrl_SERIPH1st_1	Ctrl_Conv1st	ENSG00000162552.16	WNT4	chr1	22117312	22143969	-	26657	4708	21858	5	0.0497027	0	0.0276329	0	0.155823	0.230099	0.722921	0.277079	0	3	0	0.370369	FALSE	low_coverage
Ctrl_SERIPH1st_1	Ctrl_Conv1st	ENSG00000184677.19	ZBTB40	chr1	22428837	22531157	+	102320	9292	93028	20	33.4007	42.0522	1.46487	2.32436	0.0418947	4.42007	0.620247	0.379753	354	1493	0.237091	3.64459	TRUE	mature_mRNA_like
Ctrl_SERIPH1st_1	Ctrl_Conv1st	ENSG00000237200.1	ZBTB40-IT1	chr1	22517473	22519708	+	2235	273	1962	1	6.79853	5.66927	5.16565	5.16565	0.42818	0.389679			46	93	0.494092	-1.31618	TRUE	partially_spliced
Ctrl_SERIPH1st_1	Ctrl_Conv1st	ENSG00000070886.12	EPHA8	chr1	22563488	22603595	+	40107	5434	34513	14	3.15219	1.23529	0.500999	0	0.133486	2.43598	0.995169	0.00483078	24	115	0.208514	-1.33618	TRUE	mature_mRNA_like
Ctrl_SERIPH1st_1	Ctrl_Conv1st	ENSG00000173372.19	C1QA	chr1	22635056	22639681	+	4625	2957	1668	2	0	0	0	0	0	0	0	1	0	0	0	0	FALSE	low_coverage
Ctrl_SERIPH1st_1	Ctrl_Conv1st	ENSG00000159189.14	C1QC	chr1	22642557	22648110	+	5553	2695	2858	1	0	0	0	0	0	0			0	0	0	0	FALSE	low_coverage
Ctrl_SERIPH1st_1	Ctrl_Conv1st	ENSG00000173369.19	C1QB	chr1	22652712	22661637	+	8925	3077	5848	3	0	0	0	0	0	0	0	1	0	0	0	0	FALSE	low_coverage
Ctrl_SERIPH1st_1	Ctrl_Conv1st	ENSG00000133216.17	EPHB2	chr1	22710838	22921500	+	210662	12516	198146	17	7.50655	19.5145	0.646135	0.519615	0.0782939	3.34973	0.557641	0.442359	154	741	0.207799	0.949573	TRUE	mature_mRNA_like
Ctrl_SERIPH1st_1	Ctrl_Conv1st	ENSG00000215906.9	LACTBL1	chr1	22953042	22972866	-	19824	1950	17874	7	0	0	0	0	0	0	0	1	0	0	0	0	FALSE	low_coverage
Ctrl_SERIPH1st_1	Ctrl_Conv1st	ENSG00000227868.7	TEX46	chr1	23010833	23019100	-	8267	794	7473	3	0.128463	0	0.428476	0.450037	0.65223	-1.20987	0.22987	0.77013	0	11	0	0.158178	FALSE	low_coverage
Ctrl_SERIPH1st_1	Ctrl_Conv1st	ENSG00000004487.19	KDM1A	chr1	23019394	23083693	+	64299	18377	45922	11	39.9157	48.4795	3.51008	3.2004	0.0806437	3.47046	0.488004	0.511996	1823	2984	0.610904	2.46757	TRUE	mature_mRNA_like
Ctrl_SERIPH1st_1	Ctrl_Conv1st	ENSG00000169641.16	LUZP1	chr1	23084029	23178152	-	94123	9818	84305	8	35.7559	3.37076	1.35055	1.02368	0.0362988	4.62754	0.732308	0.267692	32	1554	0.0205907	3.26382	TRUE	mature_mRNA_like
Ctrl_SERIPH1st_1	Ctrl_Conv1st	ENSG00000179546.6	HTR1D	chr1	23190177	23217547	-	27370	4110	23260	5	0.661314	0	0.038951	0.030029	0.0486726	2.45391	0.269603	0.730397	0	12	0	1.6559	FALSE	low_coverage
Ctrl_SERIPH1st_1	Ctrl_Conv1st	ENSG00000125944.23	HNRNPR	chr1	23303770	23344358	-	40588	10064	30502	13	115.593	105.679	6.25346	4.98975	0.0512804	4.18662	0.665108	0.334892	1868	4530	0.412353	2.07531	TRUE	mature_mRNA_like
Ctrl_SERIPH1st_1	Ctrl_Conv1st	ENSG00000125945.16	ZNF436	chr1	23359447	23369836	-	10389	4786	5603	3	13.2875	13.2054	0.350705	0.599591	0.0255277	4.89256	0.314491	0.685509	18	220	0.081781	2.11639	TRUE	mature_mRNA_like
Ctrl_SERIPH1st_1	Ctrl_Conv1st	ENSG00000249087.10	ZNF436-AS1	chr1	23368484	23371858	+	3374	3042	332	1	2.44576	1.27006	0	0	0	4.67002			0	25	0	1.47369	TRUE	mature_mRNA_like
Ctrl_SERIPH1st_1	Ctrl_Conv1st	ENSG00000204219.12	TCEA3	chr1	23370590	23425169	-	54579	7013	47566	16	0.135035	0	0.0244713	0	0.0942993	0.917063	0.383416	0.616584	4	8	0.493827	-0.20949	FALSE	low_coverage
Ctrl_SERIPH1st_1	Ctrl_Conv1st	ENSG00000088280.22	ASAP3	chr1	23428560	23484637	-	56077	5226	50489	22	7.42939	7.48467	0.532631	0.217232	0.0660667	3.5731	1.14031	-0.140311	80	221	0.361827	1.65399	TRUE	mature_mRNA_like
Ctrl_SERIPH1st_1	Ctrl_Conv1st	ENSG00000007968.8	E2F2	chr1	23506437	23531233	-	24796	5462	19334	6	28.2966	26.4675	3.19913	2.31959	0.101252	3.10556	0.475278	0.524722	104	729	0.142642	1.6889	TRUE	mature_mRNA_like
Ctrl_SERIPH1st_1	Ctrl_Conv1st	ENSG00000117318.10	ID3	chr1	23557916	23559883	-	1967	1916			132.312	135.714							228	848	0.268836	1.24094	TRUE	unclassified
Ctrl_SERIPH1st_1	Ctrl_Conv1st	ENSG00000197880.11	MDS2	chr1	23581494	23640574	+	59080	2209	56871	8	0	0	0	0	0	0	0	1	0	0	0	0	FALSE	low_coverage
Ctrl_SERIPH1st_1	Ctrl_Conv1st	ENSG00000142676.15	RPL11	chr1	23691684	23696835	+	5151	2741	2410	5	219.683	155.748	10.9432	11.2196	0.0474291	4.31486	0.420113	0.579887	1784	2124	0.839885	0.375952	TRUE	mature_mRNA_like
Ctrl_SERIPH1st_1	Ctrl_Conv1st	ENSG00000236810.9	ELOA-AS1	chr1	23706900	23778340	-	71440	4758	66682	9	3.5061	1.63311	0.74095	1.63611	0.170449	2.10035	0.913652	0.0863483	5	221	0.0226142	-4.87983	TRUE	unclassified
Ctrl_SERIPH1st_1	Ctrl_Conv1st	ENSG00000011007.14	ELOA	chr1	23743447	23762059	+	18612	5429	13183	11	93.9899	87.2562	3.11864	3.18586	0.0320819	4.86952	0.508182	0.491818	477	1845	0.258523	3.08138	TRUE	mature_mRNA_like
Ctrl_SERIPH1st_1	Ctrl_Conv1st	ENSG00000057757.11	PITHD1	chr1	23778392	23788232	+	9840	2198	7642	5	73.8358	70.9294	3.88001	2.55333	0.0498614	4.21543	0.954267	0.0457328	126	641	0.196537	0.991418	TRUE	mature_mRNA_like
Ctrl_SERIPH1st_1	Ctrl_Conv1st	ENSG00000011009.13	LYPLA2	chr1	23791109	23795544	+	4435	3348	901	4	58.5744	101.814	2.07658	1.99551	0.0341819	4.75259	0.252933	0.747067	307	664	0.46228	4.61183	TRUE	mature_mRNA_like
Ctrl_SERIPH1st_1	Ctrl_Conv1st	ENSG00000117308.16	GALE	chr1	23795598	23800781	-	5183	4207	792	2	11.0654	30.2687	1.15404	0.84448	0.0936766	3.15438	0.859549	0.140451	85	158	0.537634	3.21103	TRUE	mature_mRNA_like
Ctrl_SERIPH1st_1	Ctrl_Conv1st	ENSG00000117305.16	HMGCL	chr1	23801876	23838620	-	36744	5894	30850	13	4.66322	1.4212	0.682658	0.362832	0.125353	2.60548	1.54024	-0.540242	15	162	0.0925355	4.43006	TRUE	mature_mRNA_like
Ctrl_SERIPH1st_1	Ctrl_Conv1st	ENSG00000179163.13	FUCA1	chr1	23845076	23868356	-	23280	2109	21171	7	23.0251	24.213	0.286618	0.188545	0.0122425	5.90241	0.83702	0.16298	85	183	0.464227	-0.087806	TRUE	mature_mRNA_like
Ctrl_SERIPH1st_1	Ctrl_Conv1st	ENSG00000188822.8	CNR2	chr1	23870514	23913362	-	42848	5265	37583	1	0.11453	0.0585665	0	0	0	1.10118			0	2	0	0.555018	FALSE	low_coverage
Ctrl_SERIPH1st_1	Ctrl_Conv1st	ENSG00000189266.14	PNRC2	chr1	23956838	23963776	+	6938	3399	3465	3	77.8803	0.182432	1.23261	0.51083	0.0155608	5.87078	1.1252	-0.125199	274	897	0.305429	9.35765	TRUE	mature_mRNA_like
Ctrl_SERIPH1st_1	Ctrl_Conv1st	ENSG00000188529.16	SRSF10	chr1	23964346	23980927	-	16581	11860	4721	4	65.1018	61.1906	16.4921	19.226	0.201876	1.97442	0.496924	0.503076	715	2853	0.250605	-0.570001	TRUE	partially_spliced
Ctrl_SERIPH1st_1	Ctrl_Conv1st	ENSG00000142661.20	MYOM3	chr1	24056034	24112190	-	56156	9800	46228	33	0.996633	0.596553	0.202691	0	0.155997	1.85716	0.950292	0.0497084	21	64	0.327613	-0.966808	TRUE	partially_spliced
Ctrl_SERIPH1st_1	Ctrl_Conv1st	ENSG00000230703.1	MYOM3-AS1	chr1	24066773	24083565	+	16792	461	16331	2	0	0	0	0	0	0	0	1	0	0	0	0	FALSE	low_coverage
Ctrl_SERIPH1st_1	Ctrl_Conv1st	ENSG00000142677.5	IL22RA1	chr1	24119770	24143165	-	23395	2962	20433	6	0.101958	0	0	0	0	1.01405	0	1	0	1	0	0.516402	FALSE	low_coverage
Ctrl_SERIPH1st_1	Ctrl_Conv1st	ENSG00000185436.13	IFNLR1	chr1	24154167	24187959	-	33792	4940	28852	7	10.1715	8.27866	1.28158	1.28961	0.11093	2.89425	0.424607	0.575393	34	291	0.116798	2.00741	TRUE	mature_mRNA_like
Ctrl_SERIPH1st_1	Ctrl_Conv1st	ENSG00000158055.17	GRHL3	chr1	24199557	24364482	+	164925	4266	160593	20	0.52977	0.17881	0.0627609	0	0.0906254	1.95207	1.44013	-0.440134	3	41	0.0729927	1.66801	FALSE	low_coverage
Ctrl_SERIPH1st_1	Ctrl_Conv1st	ENSG00000232298.3	GRHL3-AS1	chr1	24307555	24321903	-	14348	1044	13304	4	3.09004	1.41641	2.31577	2.00198	0.420605	0.401091	0.631397	0.368603	0	115	0	-1.50328	TRUE	pre_mRNA_like
Ctrl_SERIPH1st_1	Ctrl_Conv1st	ENSG00000001460.19	STPG1	chr1	24355885	24416934	-	61049	9624	51425	11	6.08229	9.11212	1.31475	0.950357	0.175369	2.1276	0.454012	0.545988	67	421	0.159107	1.14733	TRUE	partially_spliced
Ctrl_SERIPH1st_1	Ctrl_Conv1st	ENSG00000001461.20	NIPAL3	chr1	24413526	24476735	+	63209	14280	48929	18	18.1321	20.6337	3.00311	2.37951	0.141421	2.5547	0.449393	0.550607	160	1356	0.117985	1.41558	TRUE	mature_mRNA_like
Ctrl_SERIPH1st_1	Ctrl_Conv1st	ENSG00000286061.3	RCAN3AS	chr1	24496253	24556046	-	59793	4765	55028	14	0.324869	0	0.0797775	0	0.158086	1.2408	1.43423	-0.434228	0	20	0	2.10785	FALSE	low_coverage
Ctrl_SERIPH1st_1	Ctrl_Conv1st	ENSG00000117602.14	RCAN3	chr1	24502339	24541040	+	38701	7645	31056	6	21.846	9.71839	0.597147	0.445503	0.026489	4.97635	0.574703	0.425297	35	622	0.0562611	3.43141	TRUE	mature_mRNA_like
Ctrl_SERIPH1st_1	Ctrl_Conv1st	ENSG00000184454.8	NCMAP	chr1	24556075	24609328	+	53253	4971	48282	6	0	0	0	0	0	0	0	1	0	0	0	0	FALSE	low_coverage
Ctrl_SERIPH1st_1	Ctrl_Conv1st	ENSG00000133226.20	SRRM1	chr1	24631715	24673281	+	41566	8109	33457	22	103.497	62.3103	4.22566	3.95078	0.0391909	4.58192	0.818812	0.181188	1793	3280	0.54663	5.15137	TRUE	mature_mRNA_like
Ctrl_SERIPH1st_1	Ctrl_Conv1st	ENSG00000169504.16	CLIC4	chr1	24745341	24844321	+	98980	4507	94473	6	98.6499	123.883	1.23687	1.19672	0.0123704	6.20685	0.617177	0.382823	364	1876	0.19402	2.44311	TRUE	mature_mRNA_like
Ctrl_SERIPH1st_1	Ctrl_Conv1st	ENSG00000020633.19	RUNX3	chr1	24899510	24965121	-	65611	4922	60680	6	2.55892	1.97484	0.178527	0.140501	0.0629181	3.25495	0.780883	0.219117	8	78	0.102433	3.26743	TRUE	mature_mRNA_like
Ctrl_SERIPH1st_1	Ctrl_Conv1st	ENSG00000229162.1	RUNX3-AS1	chr1	24961344	24963097	+	1753	820	933	2	0	0	0	0	0	0	0	1	1	1	0.909091	0	FALSE	low_coverage
Ctrl_SERIPH1st_1	Ctrl_Conv1st	ENSG00000117614.11	SYF2	chr1	25222275	25232504	-	10229	3796	6422	5	10.5364	12.7232	1.69371	1.50427	0.137364	2.56799	0.518889	0.481111	57	172	0.331203	1.07869	TRUE	mature_mRNA_like
Ctrl_SERIPH1st_1	Ctrl_Conv1st	ENSG00000117616.19	RSRP1	chr1	25242247	25338244	-	95997	6911	89076	11	13.1415	1.67961	0.594773	0.963801	0.0429865	4.25238	0.982253	0.017747	25	483	0.0517491	3.05053	TRUE	mature_mRNA_like
Ctrl_SERIPH1st_1	Ctrl_Conv1st	ENSG00000187010.21	RHD	chr1	25272392	25330445	+	58053	3313	54740	10	0	0	0	0	0	0	0	1	0	0	0	0	FALSE	low_coverage
Ctrl_SERIPH1st_1	Ctrl_Conv1st	ENSG00000183726.12	TMEM50A	chr1	25338294	25362362	+	24068	4690	19376	5	55.4303	97.5907	2.08268	2.22158	0.0361495	4.6691	0.195722	0.804278	400	1000	0.39996	1.90985	TRUE	mature_mRNA_like
Ctrl_SERIPH1st_1	Ctrl_Conv1st	ENSG00000188672.19	RHCE	chr1	25362248	25430192	-	67944	2433	65511	13	0.0690505	0	0.0619743	0	0.268258	0.0616893	1.25665	-0.25665	0	14	0	-1.39492	FALSE	low_coverage
Ctrl_SERIPH1st_1	Ctrl_Conv1st	ENSG00000204178.12	MACO1	chr1	25430852	25500209	+	69357	4089	65268	11	36.6212	41.4751	1.79581	1.90043	0.0466239	4.27573	0.396292	0.603708	242	892	0.27127	1.28605	TRUE	mature_mRNA_like
Ctrl_SERIPH1st_1	Ctrl_Conv1st	ENSG00000157978.14	LDLRAP1	chr1	25543572	25591200	+	47628	6915	40614	12	17.2007	7.32124	2.39632	3.02764	0.121659	2.79296	0.707708	0.292292	84	723	0.116167	-3.40277	TRUE	mature_mRNA_like
Ctrl_SERIPH1st_1	Ctrl_Conv1st	ENSG00000117643.17	MAN1C1	chr1	25616790	25786205	+	169415	9709	159706	16	1.16593	1	0.204776	0.163243	0.139237	2.05437	0.877371	0.122629	8	146	0.054757	0.569425	TRUE	mature_mRNA_like
Ctrl_SERIPH1st_1	Ctrl_Conv1st	ENSG00000162430.18	SELENON	chr1	25800192	25818221	+	18029	4403	13543	12	156.343	140.438	5.15838	3.88519	0.0319205	4.89487	0.596126	0.403874	780	2532	0.308045	2.54739	TRUE	mature_mRNA_like
Ctrl_SERIPH1st_1	Ctrl_Conv1st	ENSG00000117640.19	MTFR1L	chr1	25818639	25832947	+	14308	6949	7261	4	23.0885	12.0614	2.59771	1.65267	0.10074	3.1036	0.798853	0.201147	188	601	0.31276	1.93492	TRUE	mature_mRNA_like
Ctrl_SERIPH1st_1	Ctrl_Conv1st	ENSG00000127423.11	AUNIP	chr1	25831912	25859458	-	27546	2408	25138	3	53.6553	42.0643	2.94737	2.43125	0.0519794	4.14077	0.81881	0.18119	39	684	0.0570092	2.34718	TRUE	mature_mRNA_like
Ctrl_SERIPH1st_1	Ctrl_Conv1st	ENSG00000182749.7	PAQR7	chr1	25861483	25875874	-	14391	5089	9302	3	3.13932	2.05969	0.797033	0.602554	0.197464	1.85246	0.505085	0.494915	6	79	0.0758534	1.39533	TRUE	unclassified
Ctrl_SERIPH1st_1	Ctrl_Conv1st	ENSG00000117632.24	STMN1	chr1	25884180	25907237	-	23057	7396	15585	6	47.6222	0.656542	1.22759	0.621011	0.0250786	5.16778	1.0737	-0.0737036	414	1238	0.334383	-7.47041	TRUE	mature_mRNA_like
Ctrl_SERIPH1st_1	Ctrl_Conv1st	ENSG00000158006.15	PAFAH2	chr1	25959766	25999206	-	39440	5419	34021	11	9.19838	16.2293	1.63446	1.85089	0.1495	2.42249	0.4233	0.5767	64	354	0.18074	0.248132	TRUE	mature_mRNA_like
Ctrl_SERIPH1st_1	Ctrl_Conv1st	ENSG00000158008.11	EXTL1	chr1	26019883	26036464	+	16581	4542	12039	10	0.0664906	0	0.0501703	0	0.231561	0.148841	1.58947	-0.589474	0	3	0	0.684181	FALSE	low_coverage
Ctrl_SERIPH1st_1	Ctrl_Conv1st	ENSG00000158014.16	SLC30A2	chr1	26037251	26046136	-	8885	3567	5318	8	1.78441	2.3011	0.0490786	0	0.0253834	3.65997	0.774184	0.225816	13	22	0.588235	-0.472165	TRUE	mature_mRNA_like
Ctrl_SERIPH1st_1	Ctrl_Conv1st	ENSG00000158022.7	TRIM63	chr1	26051300	26068436	-	17136	2576	14560	8	0	0	0	0	0	0	0	1	0	0	0	0	FALSE	low_coverage
Ctrl_SERIPH1st_1	Ctrl_Conv1st	ENSG00000175087.11	PDIK1L	chr1	26111156	26125555	+	14399	4637	9762	4	17.4186	11.0262	1.27453	1.00851	0.0678192	3.67187	0.996814	0.00318558	21	311	0.0675024	1.74926	TRUE	mature_mRNA_like
Ctrl_SERIPH1st_1	Ctrl_Conv1st	ENSG00000197245.7	FAM110D	chr1	26159046	26163962	+	4916	4455	461	2	0.135578	0	0	0	0	1.23621	0	1	0	2	0	2.07653	FALSE	low_coverage
Ctrl_SERIPH1st_1	Ctrl_Conv1st	ENSG00000282872.2	C1orf232	chr1	26164100	26168963	-	4863	1203	3660	3	0	0	0	0	0	0	0	1	0	0	0	0	FALSE	low_coverage
Ctrl_SERIPH1st_1	Ctrl_Conv1st	ENSG00000236782.9	ZNF593OS	chr1	26169515	26171832	-	2317	2074	243	1	0.36162	0.20183	0	0	0	2.20671			1	3	0.322581	0.781058	FALSE	low_coverage
Ctrl_SERIPH1st_1	Ctrl_Conv1st	ENSG00000142684.9	ZNF593	chr1	26169907	26170873	+	966	732	234	1	109.571	114.742	4.08974	4.08974	0.0359504	4.71018			78	273	0.28561	-0.204047	TRUE	mature_mRNA_like
Ctrl_SERIPH1st_1	Ctrl_Conv1st	ENSG00000142675.19	CNKSR1	chr1	26177475	26189884	+	12409	3968	7916	12	4.15675	4.09986	0.851819	0.843981	0.166743	2.16099	0.679221	0.320779	35	80	0.436954	0.634302	TRUE	partially_spliced
Ctrl_SERIPH1st_1	Ctrl_Conv1st	ENSG00000188782.9	CATSPER4	chr1	26190560	26202968	+	12408	2030	10378	9	0	0	0.0582	0	0.367889	-0.66175	1.69919	-0.699194	0	2	0	-1.39158	FALSE	low_coverage
Ctrl_SERIPH1st_1	Ctrl_Conv1st	ENSG00000293494.3	ZPLD2P	chr1	26216111	26229976	+	13865	2710	11155	6	0	0	0.135365	0	0.575128	-1.2349	0.633031	0.366969	0	5	0	0	FALSE	low_coverage
Ctrl_SERIPH1st_1	Ctrl_Conv1st	ENSG00000130695.17	CEP85	chr1	26233668	26278814	+	45146	5888	39163	18	41.0024	46.969	1.81059	1.52372	0.0421921	4.42713	1.04271	-0.0427058	347	1042	0.332981	1.21793	TRUE	mature_mRNA_like
Ctrl_SERIPH1st_1	Ctrl_Conv1st	ENSG00000142669.16	SH3BGRL3	chr1	26280056	26281522	+	1466	905	561	1	62.6088	48.5534	0.269162	0.269162	0.00427391	7.40827			111	190	0.583903	3.00249	TRUE	mature_mRNA_like
Ctrl_SERIPH1st_1	Ctrl_Conv1st	ENSG00000158062.22	UBXN11	chr1	26281327	26318363	-	37036	4706	32071	12	27.4322	30.9144	2.21552	2.23473	0.074477	3.57171	1.02251	-0.0225088	222	673	0.329817	5.98142	TRUE	mature_mRNA_like
Ctrl_SERIPH1st_1	Ctrl_Conv1st	ENSG00000169442.9	CD52	chr1	26317957	26320523	+	2566	934	1632	2	0.32334	0	0	0	0	2.08182	0	1	0	1	0	2.29778	FALSE	low_coverage
Ctrl_SERIPH1st_1	Ctrl_Conv1st	ENSG00000176092.17	CRYBG2	chr1	26321697	26360080	-	38383	6895	31231	20	0.391443	0	0.0873491	0	0.150916	1.3913	0.80015	0.19985	9	18	0.497238	2.25483	FALSE	low_coverage
Ctrl_SERIPH1st_1	Ctrl_Conv1st	ENSG00000176083.19	ZNF683	chr1	26361633	26374522	-	12889	2806	9990	10	0	0	0	0	0	0	0	1	0	0	0	0	FALSE	low_coverage
Ctrl_SERIPH1st_1	Ctrl_Conv1st	ENSG00000131914.11	LIN28A	chr1	26410816	26429728	+	18912	3975	14937	3	0	0	0	0	0	0	0	1	0	0	0	0	FALSE	low_coverage
Ctrl_SERIPH1st_1	Ctrl_Conv1st	ENSG00000225891.3	DHDDS-AS1	chr1	26429547	26473892	-	44345	3477	40868	10	1.36152	1.06173	0.670133	0.508945	0.314373	0.924288	0.982995	0.0170053	3	109	0.0274977	-3.58229	TRUE	unclassified
Ctrl_SERIPH1st_1	Ctrl_Conv1st	ENSG00000117682.19	DHDDS	chr1	26432281	26471322	+	39041	7217	31824	13	20.3608	11.6234	2.30977	2.77518	0.101436	3.0859	0.630363	0.369637	158	746	0.211768	0.88909	TRUE	mature_mRNA_like
Ctrl_SERIPH1st_1	Ctrl_Conv1st	ENSG00000198830.14	HMGN2	chr1	26472012	26478209	+	6197	5072	1014	2	306.064	186.412	14.5	14.7634	0.0452186	4.39027	0.126557	0.873443	1806	5241	0.344584	-3.59342	TRUE	mature_mRNA_like
Ctrl_SERIPH1st_1	Ctrl_Conv1st	ENSG00000117676.15	RPS6KA1	chr1	26529755	26575030	+	45275	5889	39251	25	21.3909	22.4099	0.8812	0.718447	0.0393884	4.45303	0.990373	0.00962676	306	534	0.572926	2.132	TRUE	mature_mRNA_like
Ctrl_SERIPH1st_1	Ctrl_Conv1st	ENSG00000117713.22	ARID1A	chr1	26693235	26782104	+	88869	16790	71995	22	70.3815	107.403	3.83256	2.51357	0.0515724	4.16371	0.723729	0.276271	1256	4868	0.258006	2.27132	TRUE	mature_mRNA_like
Ctrl_SERIPH1st_1	Ctrl_Conv1st	ENSG00000060642.13	PIGV	chr1	26787053	26800659	+	13606	8510	5096	3	4.13913	3.97598	1.35714	1.03138	0.242508	1.54063	0.744882	0.255118	11	141	0.0779589	0.174258	TRUE	unclassified
Ctrl_SERIPH1st_1	Ctrl_Conv1st	ENSG00000204160.13	ZDHHC18	chr1	26826687	26857604	+	30917	5460	25457	8	34.2449	67.7536	2.69289	2.56697	0.0727067	3.62026	0.575827	0.424173	256	853	0.300082	1.72418	TRUE	mature_mRNA_like
Ctrl_SERIPH1st_1	Ctrl_Conv1st	ENSG00000175793.12	SFN	chr1	26863148	26864456	+	1308	1308			1.61621	1.61621							1	8	0.123457	-2.63862	TRUE	unclassified
Ctrl_SERIPH1st_1	Ctrl_Conv1st	ENSG00000142751.16	GPN2	chr1	26876131	26890283	-	14152	4966	9158	5	31.8083	25.9241	6.92509	1.45303	0.178328	2.18334	0.957778	0.042222	200	744	0.268781	-0.107345	TRUE	partially_spliced
Ctrl_SERIPH1st_1	Ctrl_Conv1st	ENSG00000226698.1	GPN2-AS1	chr1	26876132	26878245	+	2113	306	1807	1	0	0	0	0	0	0			1	1	0.909091	0	FALSE	low_coverage
Ctrl_SERIPH1st_1	Ctrl_Conv1st	ENSG00000198746.14	GPATCH3	chr1	26890487	26900467	-	9980	2226	7754	6	22.0557	23.5	1.00529	1.6253	0.0434043	4.32518	0.711873	0.288127	60	192	0.312337	0.249391	TRUE	mature_mRNA_like
Ctrl_SERIPH1st_1	Ctrl_Conv1st	ENSG00000090273.15	NUDC	chr1	26900237	26946885	+	46648	3397	42970	11	65.1934	35.8117	2.32204	4.60965	0.0343418	4.75264	0.621748	0.378252	582	1086	0.535862	5.14901	TRUE	mature_mRNA_like
Ctrl_SERIPH1st_1	Ctrl_Conv1st	ENSG00000131910.5	NR0B2	chr1	26911488	26913975	-	2487	1165	1322	1	0	0	0	0	0	0			0	0	0	0	FALSE	low_coverage
Ctrl_SERIPH1st_1	Ctrl_Conv1st	ENSG00000175707.11	KDF1	chr1	26949555	26960788	-	11233	2493	8740	4	0	0	0	0	0	0	0	1	0	0	0	0	FALSE	low_coverage
Ctrl_SERIPH1st_1	Ctrl_Conv1st	ENSG00000253368.5	TRNP1	chr1	26993691	27001912	+	8221	3005	5216	1	18.8033	16.7081	7.10794	7.10794	0.273264	1.39098			59	316	0.18665	1.02248	TRUE	partially_spliced
Ctrl_SERIPH1st_1	Ctrl_Conv1st	ENSG00000158246.8	TENT5B	chr1	27005019	27012850	-	7831	2382	5449	1	2.53484	2.16027	0	0	0	4.71965			0	20	0	2.58776	TRUE	mature_mRNA_like
Ctrl_SERIPH1st_1	Ctrl_Conv1st	ENSG00000090020.12	SLC9A1	chr1	27098808	27166981	-	68173	6368	61805	13	24.903	24.6706	0.988157	1.09091	0.038019	4.52214	0.647699	0.352301	134	732	0.183035	0.951884	TRUE	mature_mRNA_like
Ctrl_SERIPH1st_1	Ctrl_Conv1st	ENSG00000224311.2	WDTC1-DT	chr1	27229105	27234514	-	5409	1586	3720	3	0	0	0	0	0	0	0	1	0	0	0	0	FALSE	low_coverage
Ctrl_SERIPH1st_1	Ctrl_Conv1st	ENSG00000142784.17	WDTC1	chr1	27233775	27308711	+	74936	6867	67958	19	52.5145	68.738	1.09924	0.559377	0.0204647	5.45527	0.813624	0.186376	552	1457	0.378835	2.72762	TRUE	mature_mRNA_like
Ctrl_SERIPH1st_1	Ctrl_Conv1st	ENSG00000186501.16	TMEM222	chr1	27322138	27336401	+	14263	4483	9684	4	35.6763	43.1593	10.3039	7.64103	0.223608	1.78188	0.240857	0.759143	235	871	0.269774	1.39661	TRUE	partially_spliced
Ctrl_SERIPH1st_1	Ctrl_Conv1st	ENSG00000142765.19	SYTL1	chr1	27342008	27353937	+	11929	5747	6096	8	1.69114	0.74965	0.276575	0.181689	0.133759	2.24987	1.02434	-0.0243404	8	39	0.204604	2.78004	TRUE	mature_mRNA_like
Ctrl_SERIPH1st_1	Ctrl_Conv1st	ENSG00000142733.19	MAP3K6	chr1	27355179	27366972	-	11793	5522	5636	16	10.0599	12.8984	0.672108	0.498123	0.0620481	3.71795	1	-1.135e-06	143	197	0.72552	0.938315	TRUE	mature_mRNA_like
Ctrl_SERIPH1st_1	Ctrl_Conv1st	ENSG00000142748.15	FCN3	chr1	27369107	27374854	-	5747	2759	2988	5	0	0	0	0	0	0	0	1	0	0	0	0	FALSE	low_coverage
Ctrl_SERIPH1st_1	Ctrl_Conv1st	ENSG00000174950.12	CD164L2	chr1	27379175	27383333	-	4158	2141	2017	4	0	0	0	0	0	0	0	1	0	0	0	0	FALSE	low_coverage
Ctrl_SERIPH1st_1	Ctrl_Conv1st	ENSG00000181773.8	GPR3	chr1	27392621	27395814	+	3193	2163	946	1	0.976884	0	0	0	0	3.42879			1	8	0.123457	3.73323	FALSE	low_coverage
Ctrl_SERIPH1st_1	Ctrl_Conv1st	ENSG00000158195.12	WASF2	chr1	27404225	27490308	-	86083	7249	78740	13	127.01	75.3559	1.64994	1.64407	0.012814	6.18263	0.704473	0.295527	620	3510	0.176633	3.87632	TRUE	mature_mRNA_like
Ctrl_SERIPH1st_1	Ctrl_Conv1st	ENSG00000126705.16	AHDC1	chr1	27534034	27604431	-	70397	8444	61881	8	22.1896	7.57257	1.75943	1.88141	0.0731599	3.58344	0.398861	0.601139	74	989	0.0748155	2.07454	TRUE	mature_mRNA_like
Ctrl_SERIPH1st_1	Ctrl_Conv1st	ENSG00000000938.14	FGR	chr1	27612063	27635565	-	23502	4772	18429	17	0	0	0	0	0	0	0	1	0	0	0	0	FALSE	low_coverage
Ctrl_SERIPH1st_1	Ctrl_Conv1st	ENSG00000126709.16	IFI6	chr1	27666063	27672212	-	6149	936	5131	3	13.188	8.53846	0.0565193	0	0.00423538	6.40764	0.373246	0.626754	7	44	0.15873	4.03044	TRUE	mature_mRNA_like
Ctrl_SERIPH1st_1	Ctrl_Conv1st	ENSG00000009780.17	FAM76A	chr1	27725960	27763116	+	37156	4082	33074	10	15.9833	29.0909	0.970702	1.0704	0.0569192	3.90894	0.480972	0.519028	111	325	0.341433	1.25546	TRUE	mature_mRNA_like
Ctrl_SERIPH1st_1	Ctrl_Conv1st	ENSG00000117758.15	STX12	chr1	27773194	27824443	+	51249	3880	47369	9	29.2732	31.6651	1.11626	1.17647	0.0366113	4.59398	0.239044	0.760956	156	556	0.280525	1.68095	TRUE	mature_mRNA_like
Ctrl_SERIPH1st_1	Ctrl_Conv1st	ENSG00000117751.19	PPP1R8	chr1	27830781	27851676	+	20895	2815	18080	6	100.315	119.729	5.55382	4.78912	0.0524099	4.15061	0.534713	0.465287	346	1278	0.270714	1.88596	TRUE	mature_mRNA_like
Ctrl_SERIPH1st_1	Ctrl_Conv1st	ENSG00000130775.17	THEMIS2	chr1	27872542	27886685	+	14143	4626	9517	5	1.63035	2.17791	0.0949879	0	0.0520385	3.14961	0.469836	0.530164	9	28	0.320285	1.03738	TRUE	mature_mRNA_like
Ctrl_SERIPH1st_1	Ctrl_Conv1st	ENSG00000117748.11	RPA2	chr1	27891523	27914746	-	23223	2019	21204	7	208.275	331.729	5.9128	4.05408	0.0275927	5.115	0.43759	0.56241	865	1824	0.474206	1.37963	TRUE	mature_mRNA_like
Ctrl_SERIPH1st_1	Ctrl_Conv1st	ENSG00000130768.16	SMPDL3B	chr1	27934999	27959157	+	24158	2801	21273	10	6.63941	5.24347	1.0227	0.798021	0.131756	2.58564	0.737785	0.262215	40	134	0.298285	1.21491	TRUE	mature_mRNA_like
Ctrl_SERIPH1st_1	Ctrl_Conv1st	ENSG00000158156.9	XKR8	chr1	27959587	27968093	+	8506	5180	3326	2	16.3307	9.36744	1.15244	0.611519	0.0655421	3.71359	0.859456	0.140544	11	294	0.0374022	3.39965	TRUE	mature_mRNA_like
Ctrl_SERIPH1st_1	Ctrl_Conv1st	ENSG00000158161.17	EYA3	chr1	27970343	28088731	-	118388	7060	111306	21	78.7521	88.6495	2.13274	2.07789	0.0263351	5.14226	0.523618	0.476382	549	2653	0.206928	2.6361	TRUE	mature_mRNA_like
Ctrl_SERIPH1st_1	Ctrl_Conv1st	ENSG00000169403.13	PTAFR	chr1	28147165	28194083	-	46918	5308	41610	9	0.603994	0	0.137155	0.116505	0.163056	1.56974	0.572446	0.427554	0	30	0	-0.24373	FALSE	low_coverage
Ctrl_SERIPH1st_1	Ctrl_Conv1st	ENSG00000126698.12	DNAJC8	chr1	28199455	28233032	-	33577	2894	30545	9	197.56	135.103	2.56631	2.77326	0.012817	6.21203	0.907116	0.0928841	598	2175	0.27493	2.25889	TRUE	mature_mRNA_like
Ctrl_SERIPH1st_1	Ctrl_Conv1st	ENSG00000130770.19	ATP5IF1	chr1	28236083	28246906	+	10823	2253	8480	1	62.6671	32.0535	0.211675	0.211675	0.00336105	7.65382			111	480	0.231202	-8.79222	TRUE	mature_mRNA_like
Ctrl_SERIPH1st_1	Ctrl_Conv1st	ENSG00000130766.6	SESN2	chr1	28259472	28282491	+	23019	3795	19224	10	55.8356	46.4516	3.83609	3.24706	0.0641791	3.82893	0.45828	0.54172	241	955	0.25233	1.54441	TRUE	mature_mRNA_like
Ctrl_SERIPH1st_1	Ctrl_Conv1st	ENSG00000130772.14	MED18	chr1	28329001	28335965	+	6964	2017	4947	3	19.2479	16.0487	1.40004	0.905629	0.0674785	3.6891	0.923556	0.0764439	56	154	0.3634	1.21328	TRUE	mature_mRNA_like
Ctrl_SERIPH1st_1	Ctrl_Conv1st	ENSG00000204138.14	PHACTR4	chr1	28369562	28500364	+	130802	7796	123006	21	50.6111	39.2686	1.66764	1.54833	0.0318382	4.8424	0.716304	0.283696	467	2015	0.23175	2.4584	TRUE	mature_mRNA_like
Ctrl_SERIPH1st_1	Ctrl_Conv1st	ENSG00000180198.18	RCC1	chr1	28505942	28539300	+	33358	7856	25436	21	106.513	19.2738	24.6506	8.38248	0.187795	2.10685	1.58174	-0.581742	1373	4897	0.28037	0.661286	TRUE	partially_spliced
Ctrl_SERIPH1st_1	Ctrl_Conv1st	ENSG00000242125.3	SNHG3	chr1	28505979	28510892	+	4913	4088	825	2	98.5778	91.763	66.0133	67.9675	0.400831	0.577784	0.0808374	0.919163	54	1558	0.0346576	-0.55625	TRUE	pre_mRNA_like
Ctrl_SERIPH1st_1	Ctrl_Conv1st	ENSG00000180098.10	TRNAU1AP	chr1	28553000	28578545	+	25545	4395	21150	7	25.0146	31.1451	3.05366	3.01897	0.108408	2.99342	0.524795	0.475205	293	587	0.499063	0.170753	TRUE	mature_mRNA_like
Ctrl_SERIPH1st_1	Ctrl_Conv1st	ENSG00000197989.16	SNHG12	chr1	28578535	28583132	-	4597	4597			31.6452	31.6452							171	488	0.350338	4.38113	TRUE	unclassified
Ctrl_SERIPH1st_1	Ctrl_Conv1st	ENSG00000120656.15	TAF12	chr1	28587828	28648364	-	60536	9256	51181	10	7.01761	1.96842	1.39141	0.828342	0.163522	2.25471	1.1032	-0.103203	109	459	0.237421	-0.418359	TRUE	partially_spliced
Ctrl_SERIPH1st_1	Ctrl_Conv1st	ENSG00000188060.8	RAB42	chr1	28592199	28595449	+	3250	2301	949	1	0	0	0	0	0	0			0	0	0	0	FALSE	low_coverage
Ctrl_SERIPH1st_1	Ctrl_Conv1st	ENSG00000229388.2	TAF12-DT	chr1	28643158	28648829	+	5671	1295	4376	2	15.1305	3.1204	2.13848	1.82813	0.123121	2.76637	0.914769	0.0852314	0	108	0	1.64944	TRUE	mature_mRNA_like
Ctrl_SERIPH1st_1	Ctrl_Conv1st	ENSG00000162419.14	GMEB1	chr1	28668279	28719353	+	51074	8197	42785	11	13.9057	17.3354	1.03235	0.723706	0.0686491	3.62863	0.751564	0.248436	118	530	0.2226	1.82289	TRUE	mature_mRNA_like
Ctrl_SERIPH1st_1	Ctrl_Conv1st	ENSG00000198492.17	YTHDF2	chr1	28736620	28769784	+	33164	3866	29229	5	181.824	42.3104	5.76838	7.78942	0.0307331	4.95423	0.506597	0.493403	357	2909	0.122718	-2.6611	TRUE	mature_mRNA_like
Ctrl_SERIPH1st_1	Ctrl_Conv1st	ENSG00000116329.12	OPRD1	chr1	28812169	28871267	+	59098	9317	49781	2	2.58731	0.514286	0.16663	0.248645	0.0583858	3.33325	0.272941	0.727059	1	109	0.0091659	2.41276	TRUE	mature_mRNA_like
Ctrl_SERIPH1st_1	Ctrl_Conv1st	ENSG00000159023.24	EPB41	chr1	28887090	29120046	+	232956	21153	211803	30	47.7801	34.9225	1.62626	1.53096	0.0328495	4.79371	0.876789	0.123211	1299	4526	0.287002	2.44564	TRUE	mature_mRNA_like
Ctrl_SERIPH1st_1	Ctrl_Conv1st	ENSG00000253304.3	TMEM200B	chr1	29119428	29123918	-	4490	2621	1869	2	1.34071	0	0.308721	0.394153	0.176469	1.81759	0.38513	0.61487	0	14	0	3.31039	TRUE	unclassified
Ctrl_SERIPH1st_1	Ctrl_Conv1st	ENSG00000116350.19	SRSF4	chr1	29147742	29181922	-	34180	8846	25334	7	71.3832	76.54	11.9129	12.4827	0.142847	2.57302	0.478226	0.521774	518	3122	0.165914	1.09728	TRUE	mature_mRNA_like
Ctrl_SERIPH1st_1	Ctrl_Conv1st	ENSG00000116353.17	MECR	chr1	29192656	29230945	-	38289	4216	34073	15	33.8909	29.1527	7.43912	8.47539	0.179559	2.17268	0.436099	0.563901	221	1326	0.166654	0.318612	TRUE	partially_spliced
Ctrl_SERIPH1st_1	Ctrl_Conv1st	ENSG00000060656.21	PTPRU	chr1	29236504	29326813	+	90309	6693	83527	31	108.407	125.596	2.10483	1.89141	0.0190289	5.62098	0.708369	0.291631	1560	3004	0.51929	0.881556	TRUE	mature_mRNA_like
Ctrl_SERIPH1st_1	Ctrl_Conv1st	ENSG00000162510.6	MATN1	chr1	30711276	30723585	-	12309	4604	7705	7	0.0655951	0	0	0	0	0.72766	0	1	1	1	0.909091	0.370105	FALSE	low_coverage
Ctrl_SERIPH1st_1	Ctrl_Conv1st	ENSG00000186056.12	MATN1-AS1	chr1	30718503	30726846	+	8343	4105	4238	3	1.20585	1.30495	1.16328	1.18769	0.471131	0.0478052	0.662082	0.337918	0	33	0	-0.0887365	TRUE	pre_mRNA_like
Ctrl_SERIPH1st_1	Ctrl_Conv1st	ENSG00000162511.9	LAPTM5	chr1	30732464	30757855	-	25391	3370	22021	7	0.179229	0	0.0137142	0	0.0468153	1.29603	0.503127	0.496873	0	3	0	0.842343	FALSE	low_coverage
Ctrl_SERIPH1st_1	Ctrl_Conv1st	ENSG00000162512.17	SDC3	chr1	30869465	30908810	-	39345	7117	32228	7	26.2828	1.74107	2.35637	1.90316	0.0819914	3.425	0.339211	0.660789	65	877	0.0741079	2.56362	TRUE	mature_mRNA_like
Ctrl_SERIPH1st_1	Ctrl_Conv1st	ENSG00000134644.17	PUM1	chr1	30931504	31065991	-	134487	7286	127201	28	154.478	163.915	7.95096	8.65724	0.0489201	4.26303	0.456155	0.543845	1813	7143	0.253811	1.57596	TRUE	mature_mRNA_like
Ctrl_SERIPH1st_1	Ctrl_Conv1st	ENSG00000084628.11	NKAIN1	chr1	31179343	31239966	-	60623	3824	56799	7	10.8957	8.47783	0.375782	0	0.0330461	4.53049	0.75415	0.24585	12	212	0.0565771	1.7603	TRUE	mature_mRNA_like
Ctrl_SERIPH1st_1	Ctrl_Conv1st	ENSG00000060688.14	SNRNP40	chr1	31259567	31296788	-	37221	3983	33235	10	120.829	140.584	6.52977	6.79067	0.0512307	4.18905	0.47153	0.52847	1062	2334	0.454993	0.44006	TRUE	mature_mRNA_like
Ctrl_SERIPH1st_1	Ctrl_Conv1st	ENSG00000121766.17	ZCCHC17	chr1	31296981	31365527	+	68546	2825	65721	12	44.6712	20.5616	2.32422	2.18839	0.0493513	4.20698	0.309443	0.690557	133	935	0.142231	1.0319	TRUE	mature_mRNA_like
Ctrl_SERIPH1st_1	Ctrl_Conv1st	ENSG00000121769.9	FABP3	chr1	31364009	31376850	-	12841	2703	10138	7	0.446911	0.219512	0.119156	0	0.178894	1.31935	0.832648	0.167352	1	9	0.10989	1.51049	FALSE	low_coverage
Ctrl_SERIPH1st_1	Ctrl_Conv1st	ENSG00000168528.13	SERINC2	chr1	31409564	31434680	+	25116	3629	21487	14	4.34638	4.78395	0.651231	0.180203	0.127752	2.5653	1.51002	-0.510022	30	99	0.302725	0.868442	TRUE	mature_mRNA_like
Ctrl_SERIPH1st_1	Ctrl_Conv1st	ENSG00000293391.1	LDC1P	chr1	31500084	31508566	+	8482	3317	5165	5	0	0	0	0	0	0	0	1	0	0	0	0	FALSE	low_coverage
Ctrl_SERIPH1st_1	Ctrl_Conv1st	ENSG00000142910.17	TINAGL1	chr1	31576484	31587689	+	11205	6112	4827	5	0.0494109	0	0	0	0	0.579285	0	1	1	1	0.909091	0.924807	FALSE	low_coverage
Ctrl_SERIPH1st_1	Ctrl_Conv1st	ENSG00000121764.13	HCRTR1	chr1	31617659	31632518	+	14859	2538	12321	10	0.0394011	0	0.0899278	0	0.392135	-0.446209	1.12923	-0.129229	0	4	0	-1.60063	FALSE	low_coverage
Ctrl_SERIPH1st_1	Ctrl_Conv1st	ENSG00000162517.14	PEF1	chr1	31629865	31644896	-	15031	2223	12808	6	193.212	90.7741	10.9304	10.6012	0.053517	4.13137	0.22391	0.77609	365	1896	0.1925	3.21312	TRUE	mature_mRNA_like
Ctrl_SERIPH1st_1	Ctrl_Conv1st	ENSG00000235790.8	PEF1-AS1	chr1	31642598	31660162	+	17564	6632	10898	10	0.27307	0	0.0781794	0	0.173251	1.06612	0.658477	0.341523	0	9	0	-2.15023	FALSE	low_coverage
Ctrl_SERIPH1st_1	Ctrl_Conv1st	ENSG00000084636.19	COL16A1	chr1	31652259	31704319	-	52060	9256	42197	66	0.0529386	0	0.0241723	0	0.136481	0.300609	0.787381	0.212619	2	5	0.392157	0.47169	FALSE	low_coverage
Ctrl_SERIPH1st_1	Ctrl_Conv1st	ENSG00000121753.13	ADGRB2	chr1	31727116	31764893	-	37777	7756	29690	29	6.09502	7.36826	1.08057	0.55771	0.148519	2.39163	1.14456	-0.144563	87	266	0.326945	0.339659	TRUE	mature_mRNA_like
Ctrl_SERIPH1st_1	Ctrl_Conv1st	ENSG00000134668.14	SPOCD1	chr1	31790421	31816022	-	25601	7056	18545	13	0.196854	0	0.0715555	0	0.194228	0.791076	1.53461	-0.534609	1	9	0.10989	-0.24075	FALSE	low_coverage
Ctrl_SERIPH1st_1	Ctrl_Conv1st	ENSG00000184007.22	PTP4A2	chr1	31906420	31944856	-	38436	6708	31705	15	132.005	7.62791	3.67958	3.86815	0.0270987	5.12731	0.554897	0.445103	724	3361	0.215406	2.76761	TRUE	mature_mRNA_like
Ctrl_SERIPH1st_1	Ctrl_Conv1st	ENSG00000121774.19	KHDRBS1	chr1	32013686	32060850	+	47164	3820	43344	11	305.243	436.302	5.34312	5.82682	0.0171978	5.80986	0.242109	0.757891	1814	4668	0.388595	-1.80056	TRUE	mature_mRNA_like
Ctrl_SERIPH1st_1	Ctrl_Conv1st	ENSG00000121775.19	TMEM39B	chr1	32072030	32102866	+	30836	2919	27850	14	36.8873	26.3346	3.08172	2.20455	0.0769104	3.53915	1.13758	-0.137584	234	650	0.359945	0.451088	TRUE	mature_mRNA_like
Ctrl_SERIPH1st_1	Ctrl_Conv1st	ENSG00000025800.14	KPNA6	chr1	32108055	32176563	+	68508	7457	61051	14	118.2	110.61	2.74161	1.87486	0.0226501	5.3796	0.800727	0.199273	609	3515	0.173253	3.57875	TRUE	mature_mRNA_like
Ctrl_SERIPH1st_1	Ctrl_Conv1st	ENSG00000084652.17	TXLNA	chr1	32178096	32198299	+	20203	7149	13050	9	123.928	146.01	8.33533	7.78947	0.0629733	3.87807	0.479362	0.520638	661	3325	0.198791	2.89745	TRUE	mature_mRNA_like
Ctrl_SERIPH1st_1	Ctrl_Conv1st	ENSG00000160050.17	CCDC28B	chr1	32200382	32205453	+	5071	5002			7.65894	3.84484							81	129	0.627421	3.55107	TRUE	unclassified
Ctrl_SERIPH1st_1	Ctrl_Conv1st	ENSG00000224066.1	IQCC-AS1	chr1	32204768	32206814	-	2046	1357	514	2	4.89315	2.35632	3.86576	3.92245	0.43637	0.332352	0.036587	0.963413	2	34	0.058651	0.922121	TRUE	pre_mRNA_like
Ctrl_SERIPH1st_1	Ctrl_Conv1st	ENSG00000160051.13	IQCC	chr1	32205647	32208688	+	3041	2492	549	3	17.423	11.6348	6.35519	0.630252	0.266151	1.44071	1.26099	-0.260989	18	157	0.114577	0.405315	TRUE	partially_spliced
Ctrl_SERIPH1st_1	Ctrl_Conv1st	ENSG00000222046.4	DCDC2B	chr1	32209078	32216196	+	7118	1884	5234	6	0.541401	0.025114	0.234238	0.019221	0.267505	0.940353	0.817081	0.182919	2	10	0.19802	-1.42313	FALSE	low_coverage
Ctrl_SERIPH1st_1	Ctrl_Conv1st	ENSG00000160055.20	TMEM234	chr1	32214471	32222359	-	7888	3571	4222	2	17.1025	17.7182	2.47158	3.02273	0.125626	2.74189	0.258383	0.741617	56	245	0.228478	0.882017	TRUE	mature_mRNA_like
Ctrl_SERIPH1st_1	Ctrl_Conv1st	ENSG00000084623.13	EIF3I	chr1	32221076	32245397	+	24321	9526	14795	6	100.073	3.20034	1.66773	1.40606	0.0163759	5.82445	1.03543	-0.0354344	2682	3262	0.82217	-7.05511	TRUE	mature_mRNA_like
Ctrl_SERIPH1st_1	Ctrl_Conv1st	ENSG00000291132.2	MTMR9LP	chr1	32223617	32241824	-	18207	5420	12645	5	0.0118082	0	0.109134	0	0.493949	-0.903403	0.561718	0.438282	6	7	0.84507	1.64651	FALSE	low_coverage
Ctrl_SERIPH1st_1	Ctrl_Conv1st	ENSG00000183615.7	FAM167B	chr1	32247221	32248856	+	1635	947	688	1	0.144667	0.14859	0.876453	0.876453	0.781765	-1.99673			1	6	0.163934	-1.92662	TRUE	unclassified
Ctrl_SERIPH1st_1	Ctrl_Conv1st	ENSG00000182866.19	LCK	chr1	32251243	32286170	+	34927	3512	31259	9	0	0	0.0119963	0	0.107113	-0.163451	0.0513845	0.948615	0	2	0	-0.364374	FALSE	low_coverage
Ctrl_SERIPH1st_1	Ctrl_Conv1st	ENSG00000116478.14	HDAC1	chr1	32291920	32333635	+	41715	4206	37365	9	178.207	293.26	3.3298	3.1985	0.0183322	5.7001	1.27361	-0.273614	1884	2917	0.645847	3.32942	TRUE	mature_mRNA_like
Ctrl_SERIPH1st_1	Ctrl_Conv1st	ENSG00000175130.8	MARCKSL1	chr1	32333826	32336233	-	2407	1981	426	1	842.403	705.89	6.06573	6.06573	0.00714819	7.09427			424	5563	0.0762165	2.69251	TRUE	mature_mRNA_like
Ctrl_SERIPH1st_1	Ctrl_Conv1st	ENSG00000162526.7	TSSK3	chr1	32351520	32364312	+	12792	1849	10943	4	3.82585	1.05989	4.42529	4.58556	0.529903	-0.205006	0.462736	0.537264	1	186	0.00537346	-2.22641	TRUE	pre_mRNA_like
Ctrl_SERIPH1st_1	Ctrl_Conv1st	ENSG00000225828.2	FAM229A	chr1	32361269	32364278	-	3009	2845	164	1	34.6007	26.7375	14.0061	14.0061	0.287559	1.29865			2	353	0.00566412	-1.52618	TRUE	unclassified
Ctrl_SERIPH1st_1	Ctrl_Conv1st	ENSG00000160058.20	BSDC1	chr1	32364632	32394731	-	30099	6888	23211	12	65.6083	75.3515	5.92374	4.63434	0.0826968	3.44734	0.633784	0.366216	372	1973	0.188536	2.10138	TRUE	mature_mRNA_like
Ctrl_SERIPH1st_1	Ctrl_Conv1st	ENSG00000273274.3	ZBTB8B	chr1	32465049	32496686	+	31637	13988	17647	4	1.43816	0.991895	0.216297	0.233994	0.123284	2.28185	0.33383	0.66617	6	81	0.0739827	0.236055	TRUE	mature_mRNA_like
Ctrl_SERIPH1st_1	Ctrl_Conv1st	ENSG00000160062.16	ZBTB8A	chr1	32539141	32605941	+	66800	8465	58335	11	9.67868	4.54248	1.24937	1.17349	0.11329	2.85735	0.734928	0.265072	57	520	0.109594	1.32358	TRUE	mature_mRNA_like
Ctrl_SERIPH1st_1	Ctrl_Conv1st	ENSG00000176261.17	ZBTB8OS	chr1	32600171	32650969	-	50798	3607	47164	8	17.1234	14.8061	2.37749	3.45761	0.121295	2.79742	0.666958	0.333042	106	584	0.181476	-2.93332	TRUE	mature_mRNA_like
Ctrl_SERIPH1st_1	Ctrl_Conv1st	ENSG00000162521.19	RBBP4	chr1	32651141	32686211	+	35070	9470	25235	9	166.199	268.516	6.7314	6.19558	0.0389031	4.60545	0.633863	0.366137	2770	5837	0.474551	1.45234	TRUE	mature_mRNA_like
Ctrl_SERIPH1st_1	Ctrl_Conv1st	ENSG00000162520.16	SYNC	chr1	32679905	32703596	-	23691	3824	19867	7	0.824791	0	0.0758543	0	0.0758054	2.39475	0.417369	0.582631	0	16	0	1.80049	FALSE	low_coverage
Ctrl_SERIPH1st_1	Ctrl_Conv1st	ENSG00000162522.12	NHSL3	chr1	32741695	32774970	+	33275	6154	27028	7	43.4485	35.8214	1.25762	0.462991	0.0280681	5.00347	1.02363	-0.0236263	144	1005	0.143269	3.79505	TRUE	mature_mRNA_like
Ctrl_SERIPH1st_1	Ctrl_Conv1st	ENSG00000134684.14	YARS1	chr1	32775236	32818031	-	42795	9862	32933	12	74.4217	40.7244	4.3628	3.71395	0.0553061	4.06164	0.773398	0.226602	1451	2938	0.493857	1.32488	TRUE	mature_mRNA_like
Ctrl_SERIPH1st_1	Ctrl_Conv1st	ENSG00000116497.19	S100PBP	chr1	32816407	32858879	+	42472	10786	31686	16	18.2454	8.62264	3.8731	2.53521	0.174319	2.20708	0.698432	0.301568	135	1071	0.126039	0.0117111	TRUE	partially_spliced
Ctrl_SERIPH1st_1	Ctrl_Conv1st	ENSG00000160097.21	FNDC5	chr1	32862267	32872482	-	10215	3354	6861	6	1.64908	1.46132	0.115581	0.0511	0.0619851	3.02029	1.27227	-0.272269	7	22	0.316742	3.1995	TRUE	mature_mRNA_like
Ctrl_SERIPH1st_1	Ctrl_Conv1st	ENSG00000121905.11	HPCA	chr1	32881497	32898441	+	16944	3730	13214	7	0.540214	0.692294	0.280612	0	0.304739	0.750236	0.906004	0.0939964	2	19	0.104712	-1.43728	FALSE	low_coverage
Ctrl_SERIPH1st_1	Ctrl_Conv1st	ENSG00000121900.20	TMEM54	chr1	32894592	32901440	-	6848	1474	5374	6	9.45047	5.11144	0.552289	0.267888	0.0546671	3.87199	0.819454	0.180546	29	57	0.507881	2.52924	TRUE	mature_mRNA_like
Ctrl_SERIPH1st_1	Ctrl_Conv1st	ENSG00000116514.18	RNF19B	chr1	32929035	32964915	-	35880	8271	27609	11	15.738	28.3933	1.14861	0.71206	0.0676186	3.66499	0.608518	0.391482	156	540	0.288835	0.774181	TRUE	mature_mRNA_like
Ctrl_SERIPH1st_1	Ctrl_Conv1st	ENSG00000004455.19	AK2	chr1	33007985	33080996	-	73011	18123	54793	7	74.9197	19.563	1.67166	5.93386	0.0217972	5.4041	0.646012	0.353988	1856	4838	0.383622	8.35097	TRUE	mature_mRNA_like
Ctrl_SERIPH1st_1	Ctrl_Conv1st	ENSG00000142920.19	AZIN2	chr1	33081103	33123492	+	42389	9622	32767	7	1.9867	3.33653	0.985412	0.674167	0.320761	0.942979	0.657185	0.342815	21	171	0.122735	-2.01487	TRUE	partially_spliced
Ctrl_SERIPH1st_1	Ctrl_Conv1st	ENSG00000116525.14	TRIM62	chr1	33145398	33182059	-	36661	3976	32685	5	12.6494	5.21114	1.1002	1.10729	0.079439	3.40908	0.317924	0.682076	5	289	0.0172951	0.35624	TRUE	mature_mRNA_like
Ctrl_SERIPH1st_1	Ctrl_Conv1st	ENSG00000160094.16	ZNF362	chr1	33256358	33300719	+	44361	3517	40844	9	42.3949	46.0627	3.28144	2.02233	0.0716841	3.65158	0.783026	0.216974	139	945	0.147074	0.482955	TRUE	mature_mRNA_like
Ctrl_SERIPH1st_1	Ctrl_Conv1st	ENSG00000184389.9	A3GALT2	chr1	33306765	33321098	-	14333	1023	13310	4	0	0	0.294441	0.131361	0.746476	-1.97981	0.605455	0.394545	0	13	0	-1.19059	FALSE	low_coverage
Ctrl_SERIPH1st_1	Ctrl_Conv1st	ENSG00000134686.22	PHC2	chr1	33323622	33431095	-	107473	5733	101740	22	49.7232	9.33962	2.93567	2.06804	0.0556432	4.03673	0.973597	0.0264029	394	1949	0.202145	3.84069	TRUE	mature_mRNA_like
Ctrl_SERIPH1st_1	Ctrl_Conv1st	ENSG00000233246.2	PHC2-AS1	chr1	33350021	33363247	+	13226	822	12404	2	4.33333	2.21495	2.4189	2.0113	0.353009	0.815599	0.541536	0.458464	0	112	0	-2.35186	TRUE	unclassified
Ctrl_SERIPH1st_1	Ctrl_Conv1st	ENSG00000121903.16	ZSCAN20	chr1	33472596	33501643	+	29047	10621	18426	7	13.1685	11.5885	1.93113	1.7689	0.127051	2.70765	0.448442	0.551558	34	586	0.0580106	2.5006	TRUE	mature_mRNA_like
Ctrl_SERIPH1st_1	Ctrl_Conv1st	ENSG00000121904.19	CSMD2	chr1	33513997	34165842	-	651845	18114	633731	77	0.0333444	0	0.00273149	0	0.0200733	0.376278	0.133688	0.866312	2	8	0.246914	0.0796434	FALSE	low_coverage
Ctrl_SERIPH1st_1	Ctrl_Conv1st	ENSG00000176256.11	HMGB4	chr1	33860474	33864791	+	4317	2561	1756	4	0	0	0	0	0	0	0	1	0	0	0	0	FALSE	low_coverage
Ctrl_SERIPH1st_1	Ctrl_Conv1st	ENSG00000231163.7	CSMD2-AS1	chr1	33868952	33893726	+	24774	2636	22105	10	0	0	0	0	0	0	0	1	0	0	0	0	FALSE	low_coverage
Ctrl_SERIPH1st_1	Ctrl_Conv1st	ENSG00000142698.15	C1orf94	chr1	34166882	34219131	+	52249	3339	48910	7	0	0	0	0	0	0	0	1	0	0	0	0	FALSE	low_coverage
Ctrl_SERIPH1st_1	Ctrl_Conv1st	ENSG00000163866.10	SMIM12	chr1	34712736	34859805	-	147069	10919	136055	5	17.2399	0.040816	0.230083	0.220072	0.0130953	5.71512	1.36308	-0.363084	16	734	0.0217954	-5.53143	TRUE	mature_mRNA_like
Ctrl_SERIPH1st_1	Ctrl_Conv1st	ENSG00000189280.4	GJB5	chr1	34755033	34758512	+	3479	1395	2084	1	0	0	0	0	0	0			0	0	0	0	FALSE	low_coverage
Ctrl_SERIPH1st_1	Ctrl_Conv1st	ENSG00000189433.8	GJB4	chr1	34759739	34763724	+	3985	3188	797	1	0	0	0	0	0	0			0	0	0	0	FALSE	low_coverage
Ctrl_SERIPH1st_1	Ctrl_Conv1st	ENSG00000188910.9	GJB3	chr1	34781213	34786369	+	5156	2362	2794	2	0.127858	0.010417	0	0	0	1.18814	0	1	0	1	0	-1.50794	FALSE	low_coverage
Ctrl_SERIPH1st_1	Ctrl_Conv1st	ENSG00000187513.10	GJA4	chr1	34792996	34795756	+	2760	2422	338	2	0	0	0	0	0	0	0	1	0	0	0	0	FALSE	low_coverage
Ctrl_SERIPH1st_1	Ctrl_Conv1st	ENSG00000116544.12	DLGAP3	chr1	34865435	34929650	-	64215	4042	60173	12	1.05393	0.509278	0.0238978	0	0.0202897	3.21934	0.205745	0.794255	1	20	0.0497512	0.838908	TRUE	mature_mRNA_like
Ctrl_SERIPH1st_1	Ctrl_Conv1st	ENSG00000293382.1	GPR199P	chr1	34975698	34978706	-	3008	1887	1121	2	3.24218	1.34416	1.78769	1.74141	0.348486	0.824169	0.433486	0.566514	0	29	0	0.864986	TRUE	unclassified
Ctrl_SERIPH1st_1	Ctrl_Conv1st	ENSG00000243749.3	TMEM35B	chr1	34981379	34985347	-	3968	1071	2897	2	30.5836	33.8284	3.11391	3.10761	0.0921344	3.25506	0.0143429	0.985657	16	140	0.114204	2.59253	TRUE	mature_mRNA_like
Ctrl_SERIPH1st_1	Ctrl_Conv1st	ENSG00000163867.18	ZMYM6	chr1	34986143	35031951	-	45808	10398	35155	12	12.1696	20.4165	1.03852	0.82818	0.0780365	3.42986	0.783639	0.216361	212	545	0.388919	-0.615903	TRUE	mature_mRNA_like
Ctrl_SERIPH1st_1	Ctrl_Conv1st	ENSG00000197056.13	ZMYM1	chr1	35032171	35118818	+	86647	8876	77684	16	14.0346	11.7326	2.43243	1.25218	0.146824	2.48063	1.29911	-0.299112	122	1049	0.11629	5.3427	TRUE	mature_mRNA_like
Ctrl_SERIPH1st_1	Ctrl_Conv1st	ENSG00000116560.12	SFPQ	chr1	35176377	35193446	-	17069	7720	9171	11	305.903	420.232	41.1367	12.8215	0.118502	2.89154	1.07735	-0.0773539	2640	9182	0.287516	-2.20569	TRUE	mature_mRNA_like
Ctrl_SERIPH1st_1	Ctrl_Conv1st	ENSG00000146463.13	ZMYM4	chr1	35268666	35422058	+	153392	7947	145445	31	92.013	105.964	2.88358	1.60434	0.0303546	4.94829	0.767726	0.232274	1491	3840	0.388271	1.94423	TRUE	mature_mRNA_like
Ctrl_SERIPH1st_1	Ctrl_Conv1st	ENSG00000227409.1	ZMYM4-AS1	chr1	35358821	35366077	-	7256	459	6797	1	0	0	0	0	0	0			0	0	0	0	FALSE	low_coverage
Ctrl_SERIPH1st_1	Ctrl_Conv1st	ENSG00000142687.20	KIAA0319L	chr1	35393882	35557950	-	164068	22466	141503	30	19.9343	7.78289	1.89215	2.15039	0.0862953	3.33007	0.706648	0.293352	764	2394	0.319118	-0.26359	TRUE	mature_mRNA_like
Ctrl_SERIPH1st_1	Ctrl_Conv1st	ENSG00000020129.17	NCDN	chr1	35557455	35567274	+	9819	5023	4732	7	82.8921	100.354	14.4453	14.5824	0.148252	2.51242	0.508108	0.491892	460	1621	0.283758	0.287128	TRUE	mature_mRNA_like
Ctrl_SERIPH1st_1	Ctrl_Conv1st	ENSG00000239636.4	TFAP2E-AS1	chr1	35569806	35577808	-	8002	1115	6887	3	1.60987	1.53521	1.60113	1.66347	0.48358	0.0073875	0.466579	0.533421	2	43	0.0464037	-0.136693	TRUE	pre_mRNA_like
Ctrl_SERIPH1st_1	Ctrl_Conv1st	ENSG00000116819.9	TFAP2E	chr1	35573313	35595328	+	22015	4308	17707	6	1.95311	1.7861	0.390636	0.220886	0.159851	2.06509	0.885346	0.114654	4	51	0.0782779	-0.92358	TRUE	unclassified
Ctrl_SERIPH1st_1	Ctrl_Conv1st	ENSG00000126067.13	PSMB2	chr1	35599540	35641526	-	41986	4528	37367	5	230.683	1018.44	3.45896	3.80933	0.0147666	6.01894	0.3605	0.6395	1623	3922	0.413809	1.09499	TRUE	mature_mRNA_like
Ctrl_SERIPH1st_1	Ctrl_Conv1st	ENSG00000142686.9	C1orf216	chr1	35713874	35718894	-	5020	3229	1791	1	15.9539	13.6116	4.72641	4.72641	0.227447	1.7339			4	205	0.0195027	1.49936	TRUE	unclassified
Ctrl_SERIPH1st_1	Ctrl_Conv1st	ENSG00000092853.15	CLSPN	chr1	35720217	35770002	-	49785	9615	40170	26	46.193	43.1628	3.11601	1.43223	0.0630655	3.84745	1.00451	-0.00450611	565	1927	0.293187	0.61548	TRUE	mature_mRNA_like
Ctrl_SERIPH1st_1	Ctrl_Conv1st	ENSG00000232335.1	CLSPN-AS1	chr1	35739388	35743576	+	4188	539	3649	1	0	0	0	0	0	0			0	0	0	0	FALSE	low_coverage
Ctrl_SERIPH1st_1	Ctrl_Conv1st	ENSG00000302368.1	CLSPN-DT	chr1	35770086	35806944	+	36858	575	36283	2	0	0	0.231844	0.343732	0.698654	-1.73051	0.293373	0.706627	1	29	0.0343643	-1.33169	FALSE	low_coverage
Ctrl_SERIPH1st_1	Ctrl_Conv1st	ENSG00000134698.12	AGO4	chr1	35808015	35857890	+	49875	7423	42452	17	19.2841	27.128	1.68956	1.75837	0.0801737	3.4372	0.805566	0.194434	220	720	0.305513	1.31133	TRUE	mature_mRNA_like
Ctrl_SERIPH1st_1	Ctrl_Conv1st	ENSG00000092847.15	AGO1	chr1	35869807	35930532	+	60725	14115	46610	20	94.5086	153.847	3.26574	4.05393	0.0333666	4.81298	0.649467	0.350533	1339	4959	0.270009	4.64783	TRUE	mature_mRNA_like
Ctrl_SERIPH1st_1	Ctrl_Conv1st	ENSG00000126070.21	AGO3	chr1	35930695	36072500	+	141805	21191	120614	22	16.0953	51.8462	2.15374	1.77382	0.117376	2.84519	0.85603	0.14397	448	2014	0.222432	0.954824	TRUE	mature_mRNA_like
Ctrl_SERIPH1st_1	Ctrl_Conv1st	ENSG00000092850.13	TEKT2	chr1	36084093	36088278	+	4185	2487	1472	5	0.886208	0.674458	0.029212	0	0.0287684	2.93215	0.780637	0.219363	8	12	0.661157	1.6816	FALSE	low_coverage
Ctrl_SERIPH1st_1	Ctrl_Conv1st	ENSG00000116863.12	ADPRS	chr1	36088877	36093932	+	5055	1665	3306	4	55.567	46.5897	6.77253	5.47871	0.108466	3.01791	0.449298	0.550702	111	386	0.28749	1.54716	TRUE	mature_mRNA_like
Ctrl_SERIPH1st_1	Ctrl_Conv1st	ENSG00000171812.13	COL8A2	chr1	36095238	36125222	-	29984	4669	25315	3	0.129364	0	0.0119296	0	0.0494401	1.03505	0.086513	0.913487	0	3	0	0.741195	FALSE	low_coverage
Ctrl_SERIPH1st_1	Ctrl_Conv1st	ENSG00000054116.13	TRAPPC3	chr1	36136569	36156053	-	19484	3527	15957	5	65.7567	29.8885	4.35665	5.08148	0.0620487	3.8853	0.633335	0.366665	165	1007	0.163837	6.01404	TRUE	mature_mRNA_like
Ctrl_SERIPH1st_1	Ctrl_Conv1st	ENSG00000116871.17	MAP7D1	chr1	36155578	36180849	+	25271	5271	20000	15	69.6615	76.1967	3.2963	0.673611	0.045119	4.3604	1.15854	-0.158537	774	1451	0.533388	2.62893	TRUE	mature_mRNA_like
Ctrl_SERIPH1st_1	Ctrl_Conv1st	ENSG00000054118.16	THRAP3	chr1	36224391	36305376	+	80985	6090	74895	17	173.491	121.507	5.14921	5.76403	0.0288083	5.04745	0.831813	0.168187	1179	4819	0.244651	2.95062	TRUE	mature_mRNA_like
Ctrl_SERIPH1st_1	Ctrl_Conv1st	ENSG00000214193.12	SH3D21	chr1	36306367	36329340	+	22973	8142	14481	13	6.0915	6.95938	1.08943	1.18116	0.149628	2.38002	0.894622	0.105378	37	224	0.165105	0.826603	TRUE	mature_mRNA_like
Ctrl_SERIPH1st_1	Ctrl_Conv1st	ENSG00000142694.8	EVA1B	chr1	36322029	36324154	-	2125	1579	492	2	4.51995	2.30301	0.0853661	0.0857145	0.0181425	4.63943	0.461539	0.538461	2	26	0.0766284	5.10971	TRUE	mature_mRNA_like
Ctrl_SERIPH1st_1	Ctrl_Conv1st	ENSG00000196182.12	STK40	chr1	36339619	36385927	-	46308	10698	35550	15	39.7844	43.1135	3.31688	2.9798	0.0767774	3.54507	0.545549	0.454451	284	1813	0.156638	2.61398	TRUE	mature_mRNA_like
Ctrl_SERIPH1st_1	Ctrl_Conv1st	ENSG00000181817.7	LSM10	chr1	36391237	36397945	-	6708	2286	4422	4	52.479	8.23765	3.06965	2.36141	0.0551613	4.05209	0.452124	0.547876	55	450	0.122195	-2.41542	TRUE	mature_mRNA_like
Ctrl_SERIPH1st_1	Ctrl_Conv1st	ENSG00000116885.19	OSCP1	chr1	36415826	36450451	-	34625	4573	30027	13	4.27859	5.22165	0.537683	0.461679	0.109368	2.77956	0.742379	0.257621	40	120	0.333056	1.04033	TRUE	mature_mRNA_like
Ctrl_SERIPH1st_1	Ctrl_Conv1st	ENSG00000116898.13	MRPS15	chr1	36455717	36464418	-	8701	3056	5645	8	78.1469	152.088	7.87848	8.04343	0.0914768	3.29385	0.580961	0.419039	603	954	0.632009	0.562148	TRUE	mature_mRNA_like
Ctrl_SERIPH1st_1	Ctrl_Conv1st	ENSG00000119535.21	CSF3R	chr1	36465668	36483322	-	17654	11158	6288	10	0	0	0	0	0	0	0	1	0	0	0	0	FALSE	low_coverage
Ctrl_SERIPH1st_1	Ctrl_Conv1st	ENSG00000163873.10	GRIK3	chr1	36795526	37034515	-	238989	10497	228492	15	0.258741	0.156214	0.0196109	0	0.0518326	1.58459	0.352902	0.647098	8	24	0.33195	0.182373	FALSE	low_coverage
Ctrl_SERIPH1st_1	Ctrl_Conv1st	ENSG00000233621.4	LITATS1	chr1	37333697	37474432	-	140735	10169	130565	16	0.4438	0	0.0392524	0	0.0673223	1.96537	0.605672	0.394328	1	32	0.0311526	-1.28073	FALSE	low_coverage
Ctrl_SERIPH1st_1	Ctrl_Conv1st	ENSG00000163874.12	ZC3H12A	chr1	37474495	37484379	+	9884	3832	6052	5	10.382	8.27639	4.25165	1.21642	0.288567	1.26829	0.810871	0.189129	27	218	0.123796	0.910319	TRUE	partially_spliced
Ctrl_SERIPH1st_1	Ctrl_Conv1st	ENSG00000163875.17	MEAF6	chr1	37489992	37514806	-	24814	6105	18709	8	51.667	91.2069	4.01678	2.0497	0.0720063	3.65244	1.21704	-0.217038	325	1303	0.249405	1.63734	TRUE	mature_mRNA_like
Ctrl_SERIPH1st_1	Ctrl_Conv1st	ENSG00000163877.11	SNIP1	chr1	37534448	37554293	-	19845	5718	14127	4	17.1548	20.9061	3.28187	3.16074	0.159806	2.3511	0.345934	0.654066	90	485	0.185529	1.1221	TRUE	partially_spliced
Ctrl_SERIPH1st_1	Ctrl_Conv1st	ENSG00000163879.12	DNALI1	chr1	37556918	37566857	+	9939	4456	5483	4	0.12904	0	0.390845	0	0.630512	-1.09967	1.45026	-0.450256	1	9	0.10989	-1.26928	FALSE	low_coverage
Ctrl_SERIPH1st_1	Ctrl_Conv1st	ENSG00000134697.14	GNL2	chr1	37566814	37595955	-	29141	5766	23375	16	63.1223	127.151	5.77917	4.32048	0.0837543	3.42675	0.726865	0.273135	971	1668	0.582099	0.0173648	TRUE	mature_mRNA_like
Ctrl_SERIPH1st_1	Ctrl_Conv1st	ENSG00000169218.15	RSPO1	chr1	37610801	37635604	-	24803	4389	20402	9	0	0	0	0	0	0	0	1	0	0	0	0	FALSE	low_coverage
Ctrl_SERIPH1st_1	Ctrl_Conv1st	ENSG00000116922.16	AIRIM	chr1	37681569	37692296	-	10727	5522	5160	2	48.17	54.7375	8.2095	8.31457	0.145353	2.5383	0.0644316	0.935568	234	1030	0.227162	1.03451	TRUE	mature_mRNA_like
Ctrl_SERIPH1st_1	Ctrl_Conv1st	ENSG00000134690.12	CDCA8	chr1	37692480	37709719	+	17239	2421	14818	9	128.994	125.348	6.00985	5.40508	0.0444831	4.40114	0.495952	0.504048	347	1339	0.259129	1.45625	TRUE	mature_mRNA_like
Ctrl_SERIPH1st_1	Ctrl_Conv1st	ENSG00000183317.18	EPHA10	chr1	37713879	37765133	-	51254	8152	43102	23	0.436825	0	0.0973968	0	0.153569	1.44335	0.743292	0.256708	3	26	0.114943	0.868164	FALSE	low_coverage
Ctrl_SERIPH1st_1	Ctrl_Conv1st	ENSG00000185090.16	MANEAL	chr1	37793846	37804557	+	10711	3242	7469	4	96.8779	58.8002	8.93199	6.17161	0.0843357	3.42454	0.70007	0.29993	261	1273	0.205011	-1.04732	TRUE	mature_mRNA_like
Ctrl_SERIPH1st_1	Ctrl_Conv1st	ENSG00000196449.5	YRDC	chr1	37802944	37808208	-	5264	1848	3416	4	99.9394	119.233	9.51054	9.64749	0.0868146	3.37981	0.146449	0.853551	206	725	0.284099	1.21924	TRUE	mature_mRNA_like
Ctrl_SERIPH1st_1	Ctrl_Conv1st	ENSG00000197982.14	C1orf122	chr1	37806978	37809454	+	2476	2231	245	1	42.6997	77.5974	1.24082	1.24082	0.0281744	4.99642			80	324	0.246837	7.34827	TRUE	mature_mRNA_like
Ctrl_SERIPH1st_1	Ctrl_Conv1st	ENSG00000188786.11	MTF1	chr1	37809573	37859614	-	50041	8233	41808	11	27.9202	41.7908	2.30186	2.22354	0.0759136	3.54425	0.600199	0.399801	145	1089	0.133137	2.0961	TRUE	mature_mRNA_like
Ctrl_SERIPH1st_1	Ctrl_Conv1st	ENSG00000204084.15	INPP5B	chr1	37860695	37947077	-	86382	9035	77347	27	21.939	23.9472	1.1124	1.09724	0.048049	4.18412	0.824643	0.175357	336	957	0.35106	2.18723	TRUE	mature_mRNA_like
Ctrl_SERIPH1st_1	Ctrl_Conv1st	ENSG00000230955.1	INPP5B-AS1	chr1	37860696	37861580	+	884	481	403	1	0.101871	0.0620255	0	0	0	1.01344			0	1	0	-1.51403	FALSE	low_coverage
Ctrl_SERIPH1st_1	Ctrl_Conv1st	ENSG00000183431.13	SF3A3	chr1	37956974	37990517	-	33543	4513	29030	18	144.997	173.965	4.36225	4.84672	0.0291869	5.0231	0.532629	0.467371	1378	2613	0.527343	0.230472	TRUE	mature_mRNA_like
Ctrl_SERIPH1st_1	Ctrl_Conv1st	ENSG00000183386.12	FHL3	chr1	37994393	38006380	-	11987	7497	4368	7	16.2257	7.17453	3.47253	1.5858	0.175396	2.19213	0.982508	0.0174922	79	463	0.17059	2.19162	TRUE	partially_spliced
Ctrl_SERIPH1st_1	Ctrl_Conv1st	ENSG00000183520.13	UTP11	chr1	38009110	38024820	+	15710	3665	12045	8	60.8859	111.026	5.80125	4.26264	0.0868616	3.36939	0.748718	0.251282	517	978	0.528576	1.48599	TRUE	mature_mRNA_like
Ctrl_SERIPH1st_1	Ctrl_Conv1st	ENSG00000224592.6	MIR3659HG	chr1	38031124	38119530	+	88406	2552	85780	9	0.927508	0	0.307018	0.136197	0.230058	1.33599	0.662527	0.337473	3	97	0.030896	-0.157951	TRUE	unclassified
Ctrl_SERIPH1st_1	Ctrl_Conv1st	ENSG00000185668.8	POU3F1	chr1	38043828	38046793	-	2965	2965			3.55818	3.55818							1	36	0.0277008	2.20003	TRUE	unclassified
Ctrl_SERIPH1st_1	Ctrl_Conv1st	ENSG00000116954.9	RRAGC	chr1	38838197	38859772	-	21575	5140	16402	6	28.9461	20.2316	1.30844	1.28791	0.0431052	4.36618	0.403752	0.596248	135	567	0.238053	0.918407	TRUE	mature_mRNA_like
Ctrl_SERIPH1st_1	Ctrl_Conv1st	ENSG00000228436.5	RRAGC-DT	chr1	38859885	38965038	+	105153	3296	101857	11	1.94842	0.437538	0.674671	0.934727	0.247759	1.40286	0.825483	0.174517	2	256	0.00780945	-4.12386	TRUE	unclassified
Ctrl_SERIPH1st_1	Ctrl_Conv1st	ENSG00000214114.10	MYCBP	chr1	38862492	38873378	-	10886	2855	8019	5	55.4319	24.3142	2.67989	2.97824	0.0460368	4.32022	0.759952	0.240048	90	600	0.149975	2.54958	TRUE	mature_mRNA_like
Ctrl_SERIPH1st_1	Ctrl_Conv1st	ENSG00000131233.10	GJA9	chr1	38874068	38881587	-	7519	2439	5080	1	0	0	0	0	0	0			0	0	0	0	FALSE	low_coverage
Ctrl_SERIPH1st_1	Ctrl_Conv1st	ENSG00000158315.12	RHBDL2	chr1	38885806	38941830	-	56024	2984	53040	9	0	0	0	0	0	0	0	1	0	0	0	0	FALSE	low_coverage
Ctrl_SERIPH1st_1	Ctrl_Conv1st	ENSG00000174574.17	AKIRIN1	chr1	38991271	39006059	+	14788	2692	12096	4	181.593	245.028	10.3662	7.54695	0.0539737	4.1177	0.635202	0.364798	405	2067	0.195927	1.06906	TRUE	mature_mRNA_like
Ctrl_SERIPH1st_1	Ctrl_Conv1st	ENSG00000168653.12	NDUFS5	chr1	39026317	39034636	+	8319	1026	7145	2	99.5312	36.3388	2.76963	2.57947	0.0270469	5.11766	0.134968	0.865032	259	425	0.609268	-2.27343	TRUE	mature_mRNA_like
Ctrl_SERIPH1st_1	Ctrl_Conv1st	ENSG00000127603.32	MACF1	chr1	39081315	39487177	+	405862	70573	334800	96	29.4669	46.3333	1.2522	1.05592	0.0406305	4.45061	0.935348	0.0646516	3601	8358	0.43084	3.39659	TRUE	mature_mRNA_like
Ctrl_SERIPH1st_1	Ctrl_Conv1st	ENSG00000183682.9	BMP8A	chr1	39491068	39529869	+	38801	6203	32598	6	0.579397	0.64037	0.237039	0	0.258653	1.01134	0.838802	0.161198	1	38	0.0262467	0.383642	FALSE	low_coverage
Ctrl_SERIPH1st_1	Ctrl_Conv1st	ENSG00000291129.2	PPIEL	chr1	39522279	39559698	-	37419	7601	29680	13	7.8666	6.15909	2.28211	2.8275	0.222673	1.74172	0.559158	0.440842	20	430	0.0465008	0.41062	TRUE	unclassified
Ctrl_SERIPH1st_1	Ctrl_Conv1st	ENSG00000090621.16	PABPC4	chr1	39560708	39576868	-	16160	10352	5736	10	141.241	119.137	17.7148	14.7074	0.111375	2.98803	0.404247	0.595753	2976	5231	0.568905	-0.0771555	TRUE	mature_mRNA_like
Ctrl_SERIPH1st_1	Ctrl_Conv1st	ENSG00000228060.4	PABPC4-AS1	chr1	39565033	39573860	+	8827	1481	7346	4	0	0	0.131909	0.081805	0.568796	-1.21356	0.477292	0.522708	1	4	0.243902	-0.881884	FALSE	low_coverage
Ctrl_SERIPH1st_1	Ctrl_Conv1st	ENSG00000163909.9	HEYL	chr1	39623434	39639643	-	16209	4107	12102	4	10.7711	7.38095	0.34829	0.323586	0.0310435	4.59993	0.604551	0.395449	6	163	0.0367872	4.25198	TRUE	mature_mRNA_like
Ctrl_SERIPH1st_1	Ctrl_Conv1st	ENSG00000116981.5	NT5C1A	chr1	39651228	39673328	-	22100	9134	12966	6	4.32625	3.93628	0.303717	0.0056275	0.0642112	3.45467	1.18176	-0.181762	6	145	0.0413508	2.92731	TRUE	mature_mRNA_like
Ctrl_SERIPH1st_1	Ctrl_Conv1st	ENSG00000116983.14	HPCAL4	chr1	39678647	39691485	-	12838	4821	8017	5	2.71707	1.47827	0.0374207	0	0.0131094	4.35752	0.241888	0.758112	5	45	0.110865	4.48522	TRUE	mature_mRNA_like
Ctrl_SERIPH1st_1	Ctrl_Conv1st	ENSG00000084072.18	PPIE	chr1	39692181	39763914	+	71733	11209	60395	12	22.6179	13.6491	1.04822	3.35691	0.0441055	4.30636	0.746669	0.253331	437	1057	0.413395	7.02268	TRUE	mature_mRNA_like
Ctrl_SERIPH1st_1	Ctrl_Conv1st	ENSG00000116985.12	BMP8B	chr1	39757181	39788865	-	31684	4826	26858	6	12.9453	14.2276	2.34236	1.5463	0.152223	2.41718	0.472437	0.527563	27	417	0.0647327	1.45426	TRUE	unclassified
Ctrl_SERIPH1st_1	Ctrl_Conv1st	ENSG00000198754.5	OXCT2	chr1	39769522	39771348	-	1826	1826			3.82147	3.82147							2	27	0.0738007	0.0847917	TRUE	unclassified
Ctrl_SERIPH1st_1	Ctrl_Conv1st	ENSG00000285905.1	BMP8B-AS1	chr1	39779968	39781418	+	1450	1218	232	1	0	0	0	0	0	0			0	0	0	0	FALSE	low_coverage
Ctrl_SERIPH1st_1	Ctrl_Conv1st	ENSG00000043514.17	TRIT1	chr1	39838109	39883511	-	45402	6533	38869	12	19.195	35.1515	6.74239	6.89069	0.25895	1.49566	0.329366	0.670634	218	1296	0.168197	0.638448	TRUE	partially_spliced
Ctrl_SERIPH1st_1	Ctrl_Conv1st	ENSG00000236546.2	MYCL-AS1	chr1	39882859	39899103	+	16244	1764	14480	2	0.513605	0.205722	0.0625688	0.032564	0.0925335	1.91626	0.245647	0.754353	0	6	0	-0.000578619	FALSE	low_coverage
Ctrl_SERIPH1st_1	Ctrl_Conv1st	ENSG00000116990.12	MYCL	chr1	39895427	39902256	-	6829	4967	1862	2	9.9539	6.64428	1.37863	0.782145	0.120588	2.76543	0.88664	0.11336	17	173	0.0982091	1.13152	TRUE	mature_mRNA_like
Ctrl_SERIPH1st_1	Ctrl_Conv1st	ENSG00000168389.19	MFSD2A	chr1	39955111	39969968	+	14857	4031	10735	11	7.36194	12.959	1.5157	0.176955	0.16883	2.2074	1.15799	-0.157986	78	156	0.49968	0.812507	TRUE	partially_spliced
Ctrl_SERIPH1st_1	Ctrl_Conv1st	ENSG00000131236.19	CAP1	chr1	40039734	40072767	+	33033	6313	26720	18	164.464	264.508	2.50561	2.40859	0.0149975	5.98088	0.709334	0.290666	2303	3696	0.623089	4.22528	TRUE	mature_mRNA_like
Ctrl_SERIPH1st_1	Ctrl_Conv1st	ENSG00000131238.19	PPT1	chr1	40072709	40097267	-	24558	3379	21179	11	181.18	132.207	2.86024	2.43464	0.0155329	5.93636	0.594855	0.405145	677	2247	0.301277	2.47415	TRUE	mature_mRNA_like
Ctrl_SERIPH1st_1	Ctrl_Conv1st	ENSG00000117000.9	RLF	chr1	40161386	40240921	+	79535	6232	73303	7	52.2437	49.3955	2.85658	2.48101	0.0517494	4.14602	0.277411	0.722589	141	1791	0.0787226	1.97488	TRUE	mature_mRNA_like
Ctrl_SERIPH1st_1	Ctrl_Conv1st	ENSG00000188800.6	TMCO2	chr1	40245946	40251684	+	5738	846	4892	3	0	0	0	0	0	0	0	1	1	1	0.909091	0	FALSE	low_coverage
Ctrl_SERIPH1st_1	Ctrl_Conv1st	ENSG00000259943.3	ZMPSTE24-DT	chr1	40256332	40257994	-	1662	1662			8.89109	8.89109							0	49	0	-1.5309	TRUE	unclassified
Ctrl_SERIPH1st_1	Ctrl_Conv1st	ENSG00000084073.11	ZMPSTE24	chr1	40258040	40294180	+	36140	4022	32118	13	95.3836	96.6663	2.98493	3.1812	0.0303135	4.95194	0.385561	0.614439	704	1598	0.440523	0.553096	TRUE	mature_mRNA_like
Ctrl_SERIPH1st_1	Ctrl_Conv1st	ENSG00000049089.16	COL9A2	chr1	40300486	40317813	-	17327	4313	12269	26	3.93091	2.10435	0.277121	0	0.0643267	3.418	1.78953	-0.789528	20	68	0.293686	2.83213	TRUE	mature_mRNA_like
Ctrl_SERIPH1st_1	Ctrl_Conv1st	ENSG00000084070.13	SMAP2	chr1	40344849	40423326	+	78477	3631	74846	14	71.4803	60.7892	1.92248	2.60379	0.0261552	5.14536	0.80206	0.19794	290	1347	0.215277	6.91212	TRUE	mature_mRNA_like
Ctrl_SERIPH1st_1	Ctrl_Conv1st	ENSG00000284677.1	ZFP69B-DT	chr1	40436198	40450039	-	13841	673	13085	3	1.43091	0	0.123729	0.09719	0.0747774	2.77456	0.313	0.687	0	10	0	-2.28348	TRUE	mature_mRNA_like
Ctrl_SERIPH1st_1	Ctrl_Conv1st	ENSG00000187801.16	ZFP69B	chr1	40450052	40464142	+	14090	3039	11051	4	8.39421	5.39596	0.73568	0.817026	0.0797063	3.34546	0.650533	0.349467	21	117	0.179334	0.918891	TRUE	mature_mRNA_like
Ctrl_SERIPH1st_1	Ctrl_Conv1st	ENSG00000187815.11	ZFP69	chr1	40477232	40496530	+	19298	4561	14737	5	10.0285	16.2351	1.49216	1.79165	0.128406	2.66936	0.684511	0.315489	44	226	0.194604	-0.653914	TRUE	mature_mRNA_like
Ctrl_SERIPH1st_1	Ctrl_Conv1st	ENSG00000238287.2	EXO5-DT	chr1	40486788	40508720	-	21932	2194	19738	6	2.232	0	1.84654	1.5938	0.441911	0.260654	0.520574	0.479426	1	140	0.00713776	-0.86805	TRUE	pre_mRNA_like
Ctrl_SERIPH1st_1	Ctrl_Conv1st	ENSG00000164002.13	EXO5	chr1	40508440	40517724	+	9284	4630	4607	2	17.4063	7.39628	2.68374	2.5439	0.132924	2.65277	0.0801271	0.919873	29	315	0.0920343	1.17998	TRUE	mature_mRNA_like
Ctrl_SERIPH1st_1	Ctrl_Conv1st	ENSG00000117010.18	ZNF684	chr1	40531572	40548168	+	16596	4522	12074	5	4.22269	3.23621	1.51483	0.844729	0.259498	1.42055	0.785861	0.214139	14	125	0.11191	-0.331399	TRUE	partially_spliced
Ctrl_SERIPH1st_1	Ctrl_Conv1st	ENSG00000117016.11	RIMS3	chr1	40620678	40665690	-	45012	7386	37626	8	7.21324	9.95565	0.524637	0.488474	0.0669361	3.54942	0.504745	0.495255	31	243	0.12752	2.82364	TRUE	mature_mRNA_like
Ctrl_SERIPH1st_1	Ctrl_Conv1st	ENSG00000272145.3	NFYC-AS1	chr1	40669088	40692086	-	22998	2636	20362	5	11.264	0	1.3894	0.081446	0.108943	2.93167	1.34845	-0.348452	0	193	0	-5.79752	TRUE	mature_mRNA_like
Ctrl_SERIPH1st_1	Ctrl_Conv1st	ENSG00000066136.22	NFYC	chr1	40691569	40771606	+	80037	10951	68918	28	33.0668	3.37328	3.94456	3.35751	0.10629	3.03568	0.70552	0.29448	767	2118	0.362117	1.92277	TRUE	mature_mRNA_like
Ctrl_SERIPH1st_1	Ctrl_Conv1st	ENSG00000117013.18	KCNQ4	chr1	40783674	40840452	+	56778	4667	52111	17	4.83651	5.34104	1.54921	1.09497	0.238865	1.58171	0.934856	0.0651442	29	344	0.0842778	1.08925	TRUE	unclassified
Ctrl_SERIPH1st_1	Ctrl_Conv1st	ENSG00000179862.7	CITED4	chr1	40861053	40862363	-	1310	1310			4.0229	4.0229							0	18	0	2.25725	TRUE	unclassified
Ctrl_SERIPH1st_1	Ctrl_Conv1st	ENSG00000171793.18	CTPS1	chr1	40979299	41012565	+	33266	12522	20582	17	80.7435	122.166	9.8471	9.31891	0.108579	3.02278	0.399745	0.600255	2064	4064	0.507862	0.899963	TRUE	mature_mRNA_like
Ctrl_SERIPH1st_1	Ctrl_Conv1st	ENSG00000281207.1	SLFNL1-AS1	chr1	41014589	41043890	+	29301	4800	24501	3	14.239	3.56944	5.46843	2.90046	0.27608	1.3646	0.93413	0.0658699	0	684	0	-3.81325	TRUE	unclassified
Ctrl_SERIPH1st_1	Ctrl_Conv1st	ENSG00000171790.17	SLFNL1	chr1	41015588	41024551	-	8963	5632	3331	3	0.361151	0.200185	0	0	0	2.20524	0	1	0	7	0	-1.17697	FALSE	low_coverage
Ctrl_SERIPH1st_1	Ctrl_Conv1st	ENSG00000010803.19	SCMH1	chr1	41027201	41242306	-	215105	4679	210426	21	64.592	64.7326	3.07695	2.44633	0.0454036	4.34787	0.656247	0.343753	567	3176	0.178521	0.401952	TRUE	mature_mRNA_like
Ctrl_SERIPH1st_1	Ctrl_Conv1st	ENSG00000235358.3	SCMH1-DT	chr1	41241771	41338644	+	96873	7754	89119	12	0.127418	0	0.098823	0	0.302914	0.193864	0.962797	0.0372026	0	33	0	-1.78616	FALSE	low_coverage
Ctrl_SERIPH1st_1	Ctrl_Conv1st	ENSG00000204060.8	FOXO6	chr1	41361921	41383590	+	21669	2495	19174	2	8.13427	7.69215	1.24121	1.1711	0.130992	2.6181	0.100665	0.899335	7	152	0.0460224	0.830969	TRUE	mature_mRNA_like
Ctrl_SERIPH1st_1	Ctrl_Conv1st	ENSG00000229901.1	FOXO6-AS1	chr1	41375003	41375669	-	666	394	272	1	0	0	0	0	0	0			0	0	0	0	FALSE	low_coverage
Ctrl_SERIPH1st_1	Ctrl_Conv1st	ENSG00000127129.11	EDN2	chr1	41478773	41484686	-	5913	1653	4260	7	0	0	0	0	0	0	0	1	0	0	0	0	FALSE	low_coverage
Ctrl_SERIPH1st_1	Ctrl_Conv1st	ENSG00000127124.16	HIVEP3	chr1	41506364	42035925	-	529561	14625	514936	15	5.47118	2.28767	0.338333	0.380763	0.0572523	3.66788	0.529024	0.470976	27	850	0.031761	1.25636	TRUE	mature_mRNA_like
Ctrl_SERIPH1st_1	Ctrl_Conv1st	ENSG00000044012.4	GUCA2B	chr1	42153409	42155820	+	2411	604	1807	2	0	0	0	0	0	0	0	1	0	0	0	0	FALSE	low_coverage
Ctrl_SERIPH1st_1	Ctrl_Conv1st	ENSG00000197273.5	GUCA2A	chr1	42162689	42164745	-	2056	840	1216	2	0	0	0	0	0	0	0	1	0	0	0	0	FALSE	low_coverage
Ctrl_SERIPH1st_1	Ctrl_Conv1st	ENSG00000198815.10	FOXJ3	chr1	42176534	42335913	-	159379	9529	149757	15	49.4366	59.051	3.42839	3.27585	0.0647294	3.81141	0.688823	0.311177	544	3294	0.165144	1.17777	TRUE	mature_mRNA_like
Ctrl_SERIPH1st_1	Ctrl_Conv1st	ENSG00000177181.16	RIMKLA	chr1	42380791	42424232	+	43441	10638	32803	5	5.69647	7.73789	0.656342	0.444832	0.101714	2.93806	0.81367	0.18633	15	276	0.0543281	2.03635	TRUE	mature_mRNA_like
Ctrl_SERIPH1st_1	Ctrl_Conv1st	ENSG00000066185.14	ZMYND12	chr1	42430328	42456253	-	25925	2181	23744	7	0.312701	0	0.0453167	0	0.0989411	1.50589	0.511221	0.488779	0	7	0	-1.70484	FALSE	low_coverage
Ctrl_SERIPH1st_1	Ctrl_Conv1st	ENSG00000127125.10	PPCS	chr1	42456116	42473385	+	17269	3412	13818	3	18.6046	10.0196	2.40838	7.60819	0.114071	2.89857	0.602218	0.397782	47	324	0.145017	-4.07936	TRUE	mature_mRNA_like
Ctrl_SERIPH1st_1	Ctrl_Conv1st	ENSG00000186409.19	CCDC30	chr1	42463220	42657190	+	193970	25199	168654	34	0.51883	0	0.177778	0.0580455	0.223169	1.15561	1.22283	-0.22283	3	145	0.0206754	-2.04353	FALSE	low_coverage
Ctrl_SERIPH1st_1	Ctrl_Conv1st	ENSG00000171960.13	PPIH	chr1	42658184	42676758	+	18574	5787	12787	8	54.0873	134.805	11.4521	7.18978	0.17447	2.2298	0.644977	0.355023	716	1540	0.464905	-0.134704	TRUE	partially_spliced
Ctrl_SERIPH1st_1	Ctrl_Conv1st	ENSG00000065978.20	YBX1	chr1	42682407	42703805	+	21398	4444	16954	7	623.892	868.13	25.5953	23.6546	0.0394024	4.60195	0.476303	0.523697	2771	10739	0.258029	-0.605358	TRUE	mature_mRNA_like
Ctrl_SERIPH1st_1	Ctrl_Conv1st	ENSG00000164007.11	CLDN19	chr1	42733092	42740254	-	7162	3602	3560	3	0	0	0	0	0	0	0	1	0	0	0	0	FALSE	low_coverage
Ctrl_SERIPH1st_1	Ctrl_Conv1st	ENSG00000117385.17	P3H1	chr1	42746334	42767084	-	20750	7095	13655	14	29.3232	44.828	3.50817	2.61971	0.10653	3.02762	0.814648	0.185352	441	854	0.516333	0.475305	TRUE	mature_mRNA_like
Ctrl_SERIPH1st_1	Ctrl_Conv1st	ENSG00000164008.18	C1orf50	chr1	42767244	42779491	+	12247	5657	6590	5	13.9484	11.5662	4.46479	4.44806	0.241168	1.62178	0.519841	0.480159	71	367	0.193408	0.807253	TRUE	partially_spliced
Ctrl_SERIPH1st_1	Ctrl_Conv1st	ENSG00000293683.2	TMEM269-DT	chr1	42775812	42784895	-	9083	852	8231	3	0	0	0	0	0	0	0	1	0	0	0	0	FALSE	low_coverage
Ctrl_SERIPH1st_1	Ctrl_Conv1st	ENSG00000274386.6	TMEM269	chr1	42784990	42816619	+	31629	4398	27231	13	0.601637	0.137755	0.916272	0.826648	0.566331	-0.53449	0.946025	0.0539751	1	94	0.010627	-3.8098	TRUE	unclassified
Ctrl_SERIPH1st_1	Ctrl_Conv1st	ENSG00000177868.13	SVBP	chr1	42807039	42817397	-	10358	1804	8554	3	18.6951	20.4806	1.19991	1.20342	0.0600103	3.85388	0.630329	0.369671	40	147	0.271924	-0.520326	TRUE	mature_mRNA_like
Ctrl_SERIPH1st_1	Ctrl_Conv1st	ENSG00000164010.16	ERMAP	chr1	42817077	42845907	+	28830	7845	20796	11	3.30198	2	0.895028	0.361091	0.208291	1.77356	0.773032	0.226968	16	149	0.107311	0.150862	TRUE	partially_spliced
Ctrl_SERIPH1st_1	Ctrl_Conv1st	ENSG00000228192.11	ZNF691-DT	chr1	42832521	42891484	-	58963	4293	54670	8	1.89541	1.92146	0.187982	0.95569	0.0860964	2.79263	0.723783	0.276217	4	62	0.0644122	3.51228	TRUE	mature_mRNA_like
Ctrl_SERIPH1st_1	Ctrl_Conv1st	ENSG00000164011.19	ZNF691	chr1	42846572	42852477	+	5905	4669	1236	3	33.635	22.7845	18.254	14.6704	0.351113	0.87815	0.147559	0.852441	24	608	0.0394672	1.1766	TRUE	unclassified
Ctrl_SERIPH1st_1	Ctrl_Conv1st	ENSG00000117394.25	SLC2A1	chr1	42925352	42958893	-	33541	6614	26742	6	44.8945	39.0846	2.60396	2.46145	0.0547068	4.0566	0.324924	0.675076	431	1223	0.352383	2.6214	TRUE	mature_mRNA_like
Ctrl_SERIPH1st_1	Ctrl_Conv1st	ENSG00000227533.8	SLC2A1-DT	chr1	42959027	42996814	+	37787	4611	33176	6	1.34982	0.861111	0.486074	0.683385	0.251086	1.30671	0.451599	0.548401	0	76	0	-1.7762	TRUE	unclassified
Ctrl_SERIPH1st_1	Ctrl_Conv1st	ENSG00000186973.12	CFAP144	chr1	43145152	43156396	+	11244	843	10401	4	1.47687	1.36889	0.532545	0.481089	0.252461	1.31782	0.551457	0.448543	3	23	0.12987	-0.522169	TRUE	partially_spliced
Ctrl_SERIPH1st_1	Ctrl_Conv1st	ENSG00000117395.14	EBNA1BP2	chr1	43164174	43270936	-	106762	3561	103118	14	76.9983	0	0.231764	0.008672	0.00299707	7.8604	1.62453	-0.624535	834	992	0.840641	6.30071	TRUE	mature_mRNA_like
Ctrl_SERIPH1st_1	Ctrl_Conv1st	ENSG00000243710.9	CFAP57	chr1	43172329	43254358	+	82029	5583	76365	23	0.237328	0	0.0340208	0	0.0916143	1.33169	0.957236	0.0427645	4	13	0.305344	-0.637743	FALSE	low_coverage
Ctrl_SERIPH1st_1	Ctrl_Conv1st	ENSG00000179178.12	TMEM125	chr1	43269978	43274007	+	4029	4029			0	0							0	0	0	0	FALSE	low_coverage
Ctrl_SERIPH1st_1	Ctrl_Conv1st	ENSG00000253313.7	C1orf210	chr1	43281865	43285908	-	4043	3899	144	1	0	0	0	0	0	0			0	0	0	0	FALSE	low_coverage
Ctrl_SERIPH1st_1	Ctrl_Conv1st	ENSG00000066056.16	TIE1	chr1	43300970	43323108	+	22138	6716	15319	19	0	0	0	0	0	0	0	1	0	0	0	0	FALSE	low_coverage
Ctrl_SERIPH1st_1	Ctrl_Conv1st	ENSG00000117400.19	MPL	chr1	43337807	43354466	+	16659	3983	12676	12	0.14361	0	0.00252444	0	0.0102563	1.24861	0.278758	0.721242	0	2	0	0.805953	FALSE	low_coverage
Ctrl_SERIPH1st_1	Ctrl_Conv1st	ENSG00000234694.3	CDC20-DT	chr1	43351246	43358861	-	7615	1808	5807	2	1.33407	0.883465	0.757362	0.769837	0.345601	0.742141	0.13074	0.86926	0	23	0	0.479879	TRUE	unclassified
Ctrl_SERIPH1st_1	Ctrl_Conv1st	ENSG00000117399.15	CDC20	chr1	43358927	43363207	+	4280	2075	1835	4	327.632	319.048	6.61689	4.187	0.0197904	5.60858	0.573653	0.426347	1800	2315	0.777504	-1.56291	TRUE	mature_mRNA_like
Ctrl_SERIPH1st_1	Ctrl_Conv1st	ENSG00000066322.16	ELOVL1	chr1	43363395	43368075	-	4680	4093	506	3	48.5409	92.5323	6.58893	7.14286	0.1193	2.86232	0.294491	0.705509	284	677	0.419436	2.57694	TRUE	mature_mRNA_like
Ctrl_SERIPH1st_1	Ctrl_Conv1st	ENSG00000229431.2	MED8-AS1	chr1	43367477	43389155	+	21678	3150	18437	7	1.54825	0	0.458534	0.145903	0.217646	1.56122	0.970274	0.0297264	1	46	0.021692	-3.43399	TRUE	unclassified
Ctrl_SERIPH1st_1	Ctrl_Conv1st	ENSG00000159479.18	MED8	chr1	43383916	43389808	-	5892	2704	3188	5	60.0055	56.8962	3.62484	4.05287	0.0568778	4.01225	0.44649	0.55351	210	587	0.35769	2.68007	TRUE	mature_mRNA_like
Ctrl_SERIPH1st_1	Ctrl_Conv1st	ENSG00000198198.17	SZT2	chr1	43389881	43454247	+	64366	26354	37344	55	15.8059	21.4805	2.29359	1.16235	0.126025	2.73231	0.980421	0.0195788	842	1674	0.502957	1.67191	TRUE	mature_mRNA_like
Ctrl_SERIPH1st_1	Ctrl_Conv1st	ENSG00000229372.1	SZT2-AS1	chr1	43447775	43448644	-	869	699	170	1	0.515021	0.472359	0	0	0	2.62064			0	2	0	-1.84955	FALSE	low_coverage
Ctrl_SERIPH1st_1	Ctrl_Conv1st	ENSG00000178922.19	HYI	chr1	43450606	43453999	-	3393	3146	103	1	10.8598	13.8128	0	0	0	6.77608			71	116	0.611542	-1.75023	TRUE	mature_mRNA_like
Ctrl_SERIPH1st_1	Ctrl_Conv1st	ENSG00000229348.1	HYI-AS1	chr1	43453926	43456995	+	3069	545	2524	1	2.08073	4.05618	1.08875	1.08875	0.333003	0.875371			1	15	0.0662252	-3.08384	TRUE	unclassified
Ctrl_SERIPH1st_1	Ctrl_Conv1st	ENSG00000142949.19	PTPRF	chr1	43525085	43626579	+	101494	14475	86678	37	148.965	216.507	4.96729	3.0679	0.0322484	4.87858	1.00049	-0.000488115	4486	8619	0.520472	2.72536	TRUE	mature_mRNA_like
Ctrl_SERIPH1st_1	Ctrl_Conv1st	ENSG00000066135.14	KDM4A	chr1	43649255	43705518	+	56263	6155	50108	26	79.3675	88.7792	3.64848	2.96521	0.0438962	4.40599	0.707461	0.292539	932	2242	0.415682	1.27578	TRUE	mature_mRNA_like
Ctrl_SERIPH1st_1	Ctrl_Conv1st	ENSG00000236200.8	KDM4A-AS1	chr1	43685122	43708138	-	23016	5009	18007	4	0.902575	0.544437	0.921808	0.94872	0.479015	-0.0274135	0.597048	0.402952	2	71	0.0281294	-0.332675	TRUE	pre_mRNA_like
Ctrl_SERIPH1st_1	Ctrl_Conv1st	ENSG00000126091.22	ST3GAL3	chr1	43705823	43931167	+	225344	19691	205595	29	2.77782	2.24799	1.04916	0.961783	0.267168	1.32439	0.993533	0.00646722	51	913	0.0558537	-0.014606	TRUE	unclassified
Ctrl_SERIPH1st_1	Ctrl_Conv1st	ENSG00000229444.2	ST3GAL3-AS1	chr1	43708982	43727343	-	18361	926	17435	3	0	0	0	0	0	0	0	1	0	0	0	0	FALSE	low_coverage
Ctrl_SERIPH1st_1	Ctrl_Conv1st	ENSG00000117407.18	ARTN	chr1	43933319	43937244	+	3925	3511	282	2	0.565081	0.533569	0	0	0	2.73353	0	1	2	8	0.246914	1.01759	FALSE	low_coverage
Ctrl_SERIPH1st_1	Ctrl_Conv1st	ENSG00000117408.12	IPO13	chr1	43946829	43968024	+	21195	5263	15493	15	71.9458	79.1222	5.2252	3.06453	0.0676217	3.75801	0.517863	0.482137	757	1548	0.488986	-0.872846	TRUE	mature_mRNA_like
Ctrl_SERIPH1st_1	Ctrl_Conv1st	ENSG00000132768.15	DPH2	chr1	43969977	43973373	+	3396	2962	273	1	138.941	127.384	3.55678	3.55678	0.0249427	5.24879			255	1378	0.185037	1.33009	TRUE	mature_mRNA_like
Ctrl_SERIPH1st_1	Ctrl_Conv1st	ENSG00000117410.15	ATP6V0B	chr1	43974486	43978295	+	3809	3266	543	3	99.6029	83.4359	2.09208	1.99219	0.0205519	5.50726	0.78769	0.21231	760	1088	0.698465	1.64156	TRUE	mature_mRNA_like
Ctrl_SERIPH1st_1	Ctrl_Conv1st	ENSG00000117411.19	B4GALT2	chr1	43978942	43991173	+	12231	6250	5791	5	87.8341	126.435	5.72026	3.33023	0.0610784	3.91727	0.545105	0.454895	866	1940	0.446369	-0.285012	TRUE	mature_mRNA_like
Ctrl_SERIPH1st_1	Ctrl_Conv1st	ENSG00000159214.14	CCDC24	chr1	43991358	43996529	+	5171	3620	1394	2	3.29116	2.4	0.970588	0.842839	0.222523	1.66338	0.202225	0.797775	14	46	0.303688	2.49559	TRUE	partially_spliced
Ctrl_SERIPH1st_1	Ctrl_Conv1st	ENSG00000196517.14	SLC6A9	chr1	43991499	44031467	-	39968	6972	32689	18	4.37909	4	0.946985	0.376505	0.174525	2.09696	1.15706	-0.157057	52	208	0.24988	1.34089	TRUE	partially_spliced
Ctrl_SERIPH1st_1	Ctrl_Conv1st	ENSG00000171872.5	KLF17	chr1	44118820	44135140	+	16320	3160	13160	3	0	0	0	0	0	0	0	1	0	0	0	0	FALSE	low_coverage
Ctrl_SERIPH1st_1	Ctrl_Conv1st	ENSG00000283039.1	KLF18	chr1	44137820	44141631	-	3811	3159	652	1	0	0	0	0	0	0			0	0	0	0	FALSE	low_coverage
Ctrl_SERIPH1st_1	Ctrl_Conv1st	ENSG00000178028.15	DMAP1	chr1	44213426	44220681	+	7255	5627	1628	7	39.6824	37.6002	2.17199	1.69857	0.0517702	4.1301	0.694947	0.305053	220	755	0.291352	-0.570936	TRUE	mature_mRNA_like
Ctrl_SERIPH1st_1	Ctrl_Conv1st	ENSG00000117419.17	ERI3	chr1	44221069	44355267	-	134198	3099	131099	16	141.611	41.73	7.24554	7.70889	0.048642	4.26994	0.481621	0.518379	700	4639	0.150891	0.423209	TRUE	mature_mRNA_like
Ctrl_SERIPH1st_1	Ctrl_Conv1st	ENSG00000233602.1	ERI3-IT1	chr1	44243407	44244273	-	866	619	247	1	12.9838	19.9917	21.749	21.749	0.624382	-0.73978			437	492	0.888031	-0.363939	TRUE	partially_spliced
Ctrl_SERIPH1st_1	Ctrl_Conv1st	ENSG00000187147.20	RNF220	chr1	44405184	44651724	+	246540	9691	236827	18	61.0085	27.8813	1.80903	6.92297	0.0287523	5.00046	0.794216	0.205784	1067	3409	0.312986	1.88808	TRUE	mature_mRNA_like
Ctrl_SERIPH1st_1	Ctrl_Conv1st	ENSG00000126106.14	TMEM53	chr1	44635237	44674481	-	39244	3561	35683	4	7.16456	7.28273	0.939019	0.602604	0.114465	2.80565	0.654878	0.345122	13	199	0.0652938	-1.09817	TRUE	mature_mRNA_like
Ctrl_SERIPH1st_1	Ctrl_Conv1st	ENSG00000198520.13	ARMH1	chr1	44674691	44725591	+	50900	3516	47142	12	0.0318544	0	0.3485	0.151652	0.725506	-1.76616	1.11093	-0.110931	0	56	0	-1.5273	FALSE	low_coverage
Ctrl_SERIPH1st_1	Ctrl_Conv1st	ENSG00000142945.14	KIF2C	chr1	44739816	44767767	+	27951	3668	23968	17	78.3909	96.6175	2.69213	2.51807	0.0331612	4.81309	0.509148	0.490852	805	1179	0.682724	1.35194	TRUE	mature_mRNA_like
Ctrl_SERIPH1st_1	Ctrl_Conv1st	ENSG00000142937.13	RPS8	chr1	44775250	44778779	+	3529	2847	647	2	1562.23	1160.97	36.323	28.7548	0.022721	5.42271	0.403085	0.596915	13934	14926	0.933533	1.10463	TRUE	mature_mRNA_like
Ctrl_SERIPH1st_1	Ctrl_Conv1st	ENSG00000142959.7	BEST4	chr1	44781835	44791550	-	9715	3537	6091	10	0.0853831	0	0	0	0	0.89051	0	1	1	1	0.909091	0	FALSE	low_coverage
Ctrl_SERIPH1st_1	Ctrl_Conv1st	ENSG00000173846.15	PLK3	chr1	44800345	44805995	+	5650	3387	1891	6	7.10895	9.23148	0.304601	0.30132	0.0405402	4.15522	0.838607	0.161393	57	83	0.685921	0.134778	TRUE	mature_mRNA_like
Ctrl_SERIPH1st_1	Ctrl_Conv1st	ENSG00000188396.5	DYNLT4	chr1	44805887	44807417	-	1530	1426	104	1	0.0399718	0.0449525	0	0	0	0.485136			0	1	0	-1.16468	FALSE	low_coverage
Ctrl_SERIPH1st_1	Ctrl_Conv1st	ENSG00000222009.10	BTBD19	chr1	44808522	44817381	+	8859	5275	3435	6	2.1873	2.19449	1.45269	0.949755	0.388421	0.558872	0.988908	0.011092	8	57	0.140105	-0.80606	TRUE	partially_spliced
Ctrl_SERIPH1st_1	Ctrl_Conv1st	ENSG00000117425.16	PTCH2	chr1	44819153	44843253	-	24100	6024	17451	15	2.82138	2.60297	0.969171	0	0.249109	1.45016	1.54287	-0.54287	18	114	0.157756	-0.824281	TRUE	partially_spliced
Ctrl_SERIPH1st_1	Ctrl_Conv1st	ENSG00000070785.18	EIF2B3	chr1	44850521	44986722	-	136201	3411	132790	18	64.5567	60.4231	2.52157	2.17027	0.0375355	4.6243	0.615096	0.384904	600	1873	0.320325	1.01017	TRUE	mature_mRNA_like
Ctrl_SERIPH1st_1	Ctrl_Conv1st	ENSG00000126107.16	HECTD3	chr1	45002539	45011369	-	8830	5168	3278	13	61.827	78.6506	3.45241	3.28959	0.0528058	4.1237	0.676144	0.323856	607	1112	0.545814	0.841007	TRUE	mature_mRNA_like
Ctrl_SERIPH1st_1	Ctrl_Conv1st	ENSG00000126088.15	UROD	chr1	45010949	45015575	+	4626	4029	521	2	86.2326	67.0239	16.9232	11.6972	0.163896	2.3424	0.798608	0.201392	865	1188	0.728053	5.62649	TRUE	partially_spliced
Ctrl_SERIPH1st_1	Ctrl_Conv1st	ENSG00000162415.8	ZSWIM5	chr1	45016394	45306209	-	289815	6099	283716	15	21.4625	25.8635	0.60569	0.629104	0.0273224	4.93335	1.54839	-0.54839	150	1012	0.148207	3.12843	TRUE	mature_mRNA_like
Ctrl_SERIPH1st_1	Ctrl_Conv1st	ENSG00000186603.7	HPDL	chr1	45326894	45328710	+	1816	1816			0	0							0	0	0	0	FALSE	low_coverage
Ctrl_SERIPH1st_1	Ctrl_Conv1st	ENSG00000132781.23	MUTYH	chr1	45329162	45340893	-	11731	5985	5494	9	13.1965	13.8576	2.95377	3.11183	0.181767	2.12238	0.603627	0.396373	158	322	0.490531	2.33188	TRUE	partially_spliced
Ctrl_SERIPH1st_1	Ctrl_Conv1st	ENSG00000132773.13	TOE1	chr1	45340011	45343976	+	3965	2401	1314	4	59.9284	70.8191	16.1857	16.5756	0.212371	1.88204	0.550007	0.449993	208	563	0.369384	1.33559	TRUE	partially_spliced
Ctrl_SERIPH1st_1	Ctrl_Conv1st	ENSG00000070759.18	TESK2	chr1	45343876	45491203	-	147327	4443	142842	14	13.2057	15.5337	0.581131	0.649138	0.0418476	4.28797	0.924524	0.075476	86	476	0.180634	1.04099	TRUE	mature_mRNA_like
Ctrl_SERIPH1st_1	Ctrl_Conv1st	ENSG00000280670.4	CCDC163	chr1	45493865	45500163	-	6298	2822	3369	5	10.6084	9.58536	0.44583	0.223704	0.0399694	4.29415	0.691874	0.308126	15	106	0.141376	1.42771	TRUE	mature_mRNA_like
Ctrl_SERIPH1st_1	Ctrl_Conv1st	ENSG00000132763.16	MMACHC	chr1	45500299	45513382	+	13083	5049	8034	3	32.4884	53.7528	3.18596	2.98941	0.089057	3.30997	0.328086	0.671914	141	636	0.221663	1.87109	TRUE	mature_mRNA_like
Ctrl_SERIPH1st_1	Ctrl_Conv1st	ENSG00000117450.16	PRDX1	chr1	45510913	45542816	-	31903	3818	27986	8	419.354	40.4	2.17477	4.99334	0.00515801	7.52665	0.847752	0.152248	3629	5548	0.654098	10.7337	TRUE	mature_mRNA_like
Ctrl_SERIPH1st_1	Ctrl_Conv1st	ENSG00000117448.15	AKR1A1	chr1	45550474	45570051	+	19577	3350	16182	6	113.702	126.615	4.10759	4.78976	0.0348367	4.75739	0.409915	0.590085	959	1496	0.641	1.90347	TRUE	mature_mRNA_like
Ctrl_SERIPH1st_1	Ctrl_Conv1st	ENSG00000132780.18	NASP	chr1	45583580	45618905	+	35325	8658	26539	16	97.5124	128.058	10.4762	6.4328	0.0969224	3.20624	1.45482	-0.454819	1238	3758	0.329422	3.06663	TRUE	mature_mRNA_like
Ctrl_SERIPH1st_1	Ctrl_Conv1st	ENSG00000159588.16	CCDC17	chr1	45620043	45624058	-	4015	3324	445	2	1.95156	0.85029	0.602247	0.565306	0.226937	1.54667	0.54908	0.45092	1	24	0.0414938	-3.42085	TRUE	unclassified
Ctrl_SERIPH1st_1	Ctrl_Conv1st	ENSG00000159592.12	GPBP1L1	chr1	45627283	45688408	-	61125	9658	51419	17	55.6702	22.514	5.998	4.23288	0.0971049	3.19309	0.79642	0.20358	759	2829	0.268283	1.87209	TRUE	mature_mRNA_like
Ctrl_SERIPH1st_1	Ctrl_Conv1st	ENSG00000159596.8	TMEM69	chr1	45688148	45694443	+	6295	4202	2093	1	40.3065	56.6621	6.92356	6.92356	0.146282	2.52431			161	613	0.2626	2.1927	TRUE	mature_mRNA_like
Ctrl_SERIPH1st_1	Ctrl_Conv1st	ENSG00000197429.12	IPP	chr1	45694323	45750653	-	56330	3915	52413	12	10.4559	8.61011	0.915803	0.580829	0.0798312	3.37736	1.37147	-0.371472	43	300	0.143286	1.20573	TRUE	mature_mRNA_like
Ctrl_SERIPH1st_1	Ctrl_Conv1st	ENSG00000086015.24	MAST2	chr1	45786986	46036228	+	249242	8269	240973	32	47.8075	56.962	1.21447	1.97316	0.0247235	5.1877	0.878329	0.121671	771	2297	0.335641	2.45047	TRUE	mature_mRNA_like
Ctrl_SERIPH1st_1	Ctrl_Conv1st	ENSG00000117461.16	PIK3R3	chr1	46040139	46133338	-	93199	7495	85636	10	31.1924	37.6392	1.7042	1.03558	0.0516478	4.11638	0.556593	0.443407	189	1269	0.148924	0.876275	TRUE	mature_mRNA_like
Ctrl_SERIPH1st_1	Ctrl_Conv1st	ENSG00000117472.11	TSPAN1	chr1	46173793	46185968	+	12175	3547	8593	12	0	0	0	0	0	0	0	1	0	0	0	0	FALSE	low_coverage
Ctrl_SERIPH1st_1	Ctrl_Conv1st	ENSG00000250719.2	P3R3URF	chr1	46175485	46176488	-	1003	405	598	1	0	0	0	0	0	0			0	0	0	0	FALSE	low_coverage
Ctrl_SERIPH1st_1	Ctrl_Conv1st	ENSG00000085998.16	POMGNT1	chr1	46188680	46220305	-	31625	9200	22073	7	28.7441	27.5556	0.0779686	0	0.00269581	7.34051	1.12089	-0.120891	691	890	0.776317	8.11931	TRUE	mature_mRNA_like
Ctrl_SERIPH1st_1	Ctrl_Conv1st	ENSG00000171357.6	LURAP1	chr1	46203333	46221256	+	17923	1849	16074	1	10.8697	9.01117	1.40544	1.40544	0.11357	2.86526			1	144	0.00693963	0.892567	TRUE	mature_mRNA_like
Ctrl_SERIPH1st_1	Ctrl_Conv1st	ENSG00000085999.14	RAD54L	chr1	46246460	46278482	+	32022	4126	27805	19	92.0434	98.3286	4.20209	4.35045	0.0436148	4.42077	0.693656	0.306344	775	1655	0.46825	0.0641599	TRUE	mature_mRNA_like
Ctrl_SERIPH1st_1	Ctrl_Conv1st	ENSG00000132128.19	LRRC41	chr1	46261195	46303616	-	42421	8614	33710	10	80.2422	74.0021	2.65203	5.96398	0.0319544	4.86759	0.70984	0.29016	647	2601	0.248741	-4.52541	TRUE	mature_mRNA_like
Ctrl_SERIPH1st_1	Ctrl_Conv1st	ENSG00000173660.13	UQCRH	chr1	46300899	46316796	+	15897	1982	13850	5	86.4157	11.6159	7.40065	10.861	0.0788004	3.52788	0.534618	0.465382	444	919	0.483081	2.05562	TRUE	mature_mRNA_like
Ctrl_SERIPH1st_1	Ctrl_Conv1st	ENSG00000117481.13	NSUN4	chr1	46340718	46369218	+	28500	8390	20110	7	24.2353	33.0561	4.41338	3.87474	0.153516	2.43077	0.309813	0.690187	141	984	0.143278	0.533216	TRUE	partially_spliced
Ctrl_SERIPH1st_1	Ctrl_Conv1st	ENSG00000117480.17	FAAH	chr1	46394264	46415754	+	21490	4975	16347	12	4.62211	4.36439	0.824739	0.773842	0.148686	2.35231	0.991051	0.00894873	36	125	0.28777	1.74045	TRUE	mature_mRNA_like
Ctrl_SERIPH1st_1	Ctrl_Conv1st	ENSG00000197587.13	DMBX1	chr1	46489821	46516218	+	26397	5832	20565	4	3.36608	3.36871	0.412983	0.14467	0.106465	2.75632	0.687819	0.312181	12	94	0.127524	0.706197	TRUE	mature_mRNA_like
Ctrl_SERIPH1st_1	Ctrl_Conv1st	ENSG00000282881.4	TMEM275	chr1	46532165	46544566	-	12401	2560	9796	5	0	0	0	0	0	0	0	1	0	0	0	0	FALSE	low_coverage
Ctrl_SERIPH1st_1	Ctrl_Conv1st	ENSG00000269956.3	MKNK1-AS1	chr1	46538610	46570255	+	31645	2740	28905	7	0	0	0.0104135	0	0.0943138	-0.142917	0.0707571	0.929243	0	1	0	-0.397317	FALSE	low_coverage
Ctrl_SERIPH1st_1	Ctrl_Conv1st	ENSG00000162456.10	KNCN	chr1	46545640	46551647	-	6007	2933	3074	4	0	0	0	0	0	0	0	1	0	0	0	0	FALSE	low_coverage
Ctrl_SERIPH1st_1	Ctrl_Conv1st	ENSG00000079277.23	MKNK1	chr1	46557406	46616843	-	59437	12395	47002	18	9.21033	6.29488	1.91139	2.2743	0.170329	2.21064	0.567104	0.432896	125	680	0.183797	3.17758	TRUE	partially_spliced
Ctrl_SERIPH1st_1	Ctrl_Conv1st	ENSG00000142961.17	MOB3C	chr1	46607718	46616862	-	9144	6128	3016	2	0.897356	0.916256	0	0	0	3.31811	0	1	6	21	0.28436	1.77051	FALSE	low_coverage
Ctrl_SERIPH1st_1	Ctrl_Conv1st	ENSG00000123472.14	ATPAF1	chr1	46632070	46673867	-	41797	6377	35420	11	88.6799	98.9789	4.62157	5.02265	0.0494807	4.2329	0.420385	0.579615	566	2432	0.232721	1.94597	TRUE	mature_mRNA_like
Ctrl_SERIPH1st_1	Ctrl_Conv1st	ENSG00000186118.9	TEX38	chr1	46668854	46673594	+	4740	1464	3276	2	0.168033	0	0	0	0	1.42241	0	1	0	2	0	-1.44888	FALSE	low_coverage
Ctrl_SERIPH1st_1	Ctrl_Conv1st	ENSG00000228237.6	EFCAB14-AS1	chr1	46674035	46692098	+	18063	763	17300	4	0	0	0.043526	0.0473435	0.303262	-0.521312	0.427067	0.572933	2	3	0.645161	-0.0864154	FALSE	low_coverage
Ctrl_SERIPH1st_1	Ctrl_Conv1st	ENSG00000159658.15	EFCAB14	chr1	46674658	46719146	-	44488	16312	28176	8	28.8889	13.0012	3.11957	3.10393	0.0971572	3.17056	0.316251	0.683749	289	1866	0.154868	0.389872	TRUE	mature_mRNA_like
Ctrl_SERIPH1st_1	Ctrl_Conv1st	ENSG00000142973.17	CYP4B1	chr1	46757837	46819413	+	61576	3612	57964	20	0	0	0	0	0	0	0	1	0	0	0	0	FALSE	low_coverage
Ctrl_SERIPH1st_1	Ctrl_Conv1st	ENSG00000290456.1	CYP4Z2P	chr1	46843094	46900437	-	57343	1436	55828	10	0	0	0	0	0	0	0	1	0	0	0	0	FALSE	low_coverage
Ctrl_SERIPH1st_1	Ctrl_Conv1st	ENSG00000187048.15	CYP4A11	chr1	46928861	46941594	-	12733	4597	8010	10	0	0	0	0	0	0	0	1	0	0	0	0	FALSE	low_coverage
Ctrl_SERIPH1st_1	Ctrl_Conv1st	ENSG00000186377.9	CYP4X1	chr1	47023665	47050751	+	27086	2450	24553	10	2.2298	2.49432	0.225797	0.067181	0.0883542	2.83816	0.91354	0.0864605	11	37	0.296496	0.760884	TRUE	mature_mRNA_like
Ctrl_SERIPH1st_1	Ctrl_Conv1st	ENSG00000186160.5	CYP4Z1	chr1	47067230	47118318	+	51088	2252	48757	10	0	0	0	0	0	0	0	1	0	0	0	0	FALSE	low_coverage
Ctrl_SERIPH1st_1	Ctrl_Conv1st	ENSG00000225506.3	CYP4A22-AS1	chr1	47096652	47181087	-	84435	3016	81419	8	0.831896	1	0.235965	0.475642	0.202049	1.47186	0.549046	0.450954	1	72	0.0138696	-0.0964513	TRUE	unclassified
Ctrl_SERIPH1st_1	Ctrl_Conv1st	ENSG00000162365.14	CYP4A22	chr1	47137418	47149742	+	12324	3895	8303	9	0	0	0	0	0	0	0	1	0	0	0	0	FALSE	low_coverage
Ctrl_SERIPH1st_1	Ctrl_Conv1st	ENSG00000162366.9	PDZK1IP1	chr1	47183581	47191398	-	7817	1807	6010	7	0.167128	0	0	0	0	1.41753	0	1	0	1	0	-1.19364	FALSE	low_coverage
Ctrl_SERIPH1st_1	Ctrl_Conv1st	ENSG00000162367.13	TAL1	chr1	47216289	47232225	-	15936	5705	10231	8	0.82752	0	0.118072	0	0.112924	2.08857	0.846595	0.153405	0	20	0	3.44017	FALSE	low_coverage
Ctrl_SERIPH1st_1	Ctrl_Conv1st	ENSG00000123473.18	STIL	chr1	47250138	47314892	-	64754	8700	56054	18	32.2479	27.1609	2.25247	2.14245	0.0650996	3.78142	0.835823	0.164177	301	1361	0.221145	0.384341	TRUE	mature_mRNA_like
Ctrl_SERIPH1st_1	Ctrl_Conv1st	ENSG00000162368.16	CMPK1	chr1	47333789	47394866	+	61077	4437	56640	7	50.3293	81.8476	1.92853	1.90344	0.0368337	4.63575	0.364015	0.635985	298	1113	0.267721	0.744467	TRUE	mature_mRNA_like
Ctrl_SERIPH1st_1	Ctrl_Conv1st	ENSG00000186790.6	FOXE3	chr1	47416284	47418052	+	1768	1768			0.170814	0.170814							0	1	0	2.74144	FALSE	low_coverage
Ctrl_SERIPH1st_1	Ctrl_Conv1st	ENSG00000237424.1	FOXD2-AS1	chr1	47432132	47434641	-	2509	2509			32.6843	32.6843							1	287	0.00348311	0.040901	TRUE	unclassified
Ctrl_SERIPH1st_1	Ctrl_Conv1st	ENSG00000186564.6	FOXD2	chr1	47438043	47440691	+	2648	2648			16.6681	16.6681							0	152	0	1.20265	TRUE	unclassified
Ctrl_SERIPH1st_1	Ctrl_Conv1st	ENSG00000269113.5	TRABD2B	chr1	47760527	47997385	-	236858	7629	229229	7	8.88295	18.5081	1.6083	1.46578	0.151852	2.39462	0.705181	0.294819	78	1457	0.053531	-0.561128	TRUE	unclassified
Ctrl_SERIPH1st_1	Ctrl_Conv1st	ENSG00000117834.14	SLC5A9	chr1	48222684	48248644	+	25960	4535	21425	15	0	0	0	0	0	0	0	1	0	0	0	0	FALSE	low_coverage
Ctrl_SERIPH1st_1	Ctrl_Conv1st	ENSG00000132122.13	SPATA6	chr1	48295372	48472279	-	176907	6009	170898	16	4.39374	7.08696	0.379045	0.409335	0.0777881	3.22968	0.483645	0.516355	48	306	0.156811	-0.390693	TRUE	mature_mRNA_like
Ctrl_SERIPH1st_1	Ctrl_Conv1st	ENSG00000186094.18	AGBL4	chr1	48532853	50023954	-	1491101	7501	1483600	15	0	0	0.0010899	0	0.0107814	-0.0156388	0.0115158	0.988484	0	6	0	-0.000318465	FALSE	low_coverage
Ctrl_SERIPH1st_1	Ctrl_Conv1st	ENSG00000162373.14	BEND5	chr1	48727518	48776969	-	49451	2142	47309	5	0	0	0.0109917	0	0.0990314	-0.150451	0.130605	0.869395	0	2	0	0.267324	FALSE	low_coverage
Ctrl_SERIPH1st_1	Ctrl_Conv1st	ENSG00000230114.1	AGBL4-AS1	chr1	49257410	49269285	+	11875	566	11309	3	0	0	0	0	0	0	0	1	0	0	0	0	FALSE	low_coverage
Ctrl_SERIPH1st_1	Ctrl_Conv1st	ENSG00000225623.1	AGBL4-IT1	chr1	49374200	49472085	-	97885	514	97371	3	0	0	0	0	0	0	0	1	0	0	0	0	FALSE	low_coverage
Ctrl_SERIPH1st_1	Ctrl_Conv1st	ENSG00000162374.19	ELAVL4	chr1	50024028	50203772	+	179744	8368	171376	22	0	0	0	0	0	0	0	1	0	0	0	0	FALSE	low_coverage
Ctrl_SERIPH1st_1	Ctrl_Conv1st	ENSG00000237337.2	ELAVL4-AS1	chr1	50174145	50175927	-	1782	1077	705	1	0	0	0	0	0	0			0	0	0	0	FALSE	low_coverage
Ctrl_SERIPH1st_1	Ctrl_Conv1st	ENSG00000142700.13	DMRTA2	chr1	50417549	50423468	-	5919	3197	2722	2	2.27307	2.27872	1.14989	1.15507	0.326399	0.924953	0.0475942	0.952406	0	35	0	0.539149	TRUE	unclassified
Ctrl_SERIPH1st_1	Ctrl_Conv1st	ENSG00000225767.2	FAF1-AS1	chr1	50419180	50471151	+	51971	3237	48734	9	0.0525178	0	0.00890546	0	0.0551684	0.485902	0.104726	0.895274	0	2	0	-0.472384	FALSE	low_coverage
Ctrl_SERIPH1st_1	Ctrl_Conv1st	ENSG00000185104.22	FAF1	chr1	50437027	50960279	-	523252	7696	515528	23	43.364	91.3146	2.45051	2.01208	0.0533711	4.09096	0.631909	0.368091	833	5344	0.155873	0.398338	TRUE	mature_mRNA_like
Ctrl_SERIPH1st_1	Ctrl_Conv1st	ENSG00000123080.13	CDKN2C	chr1	50960744	50974634	+	13890	3105	10785	4	68.5063	52.4562	1.01919	3.49525	0.0146382	5.93781	0.978184	0.0218163	162	749	0.21626	7.21598	TRUE	mature_mRNA_like
Ctrl_SERIPH1st_1	Ctrl_Conv1st	ENSG00000204006.11	C1orf185	chr1	51102220	51148086	+	45866	1114	44731	5	0.479354	0	0.0420289	0.00438	0.0676378	2.02826	0.407608	0.592392	2	8	0.246914	-0.729821	FALSE	low_coverage
Ctrl_SERIPH1st_1	Ctrl_Conv1st	ENSG00000123091.6	RNF11	chr1	51235624	51273447	+	37823	3625	34198	4	64.2072	55.7436	3.36891	2.04864	0.0497799	4.21243	0.685015	0.314985	208	1166	0.178372	0.513813	TRUE	mature_mRNA_like
Ctrl_SERIPH1st_1	Ctrl_Conv1st	ENSG00000085831.17	TTC39A	chr1	51287257	51345116	-	57859	9560	48210	24	5.09812	8.83688	0.711097	0.507422	0.120337	2.68004	0.887791	0.112209	75	277	0.27066	2.99946	TRUE	mature_mRNA_like
Ctrl_SERIPH1st_1	Ctrl_Conv1st	ENSG00000261664.6	TTC39A-AS1	chr1	51329615	51335410	+	5795	2066	3662	3	0.292352	0	0.0824689	0	0.173684	1.1045	0.385742	0.614258	0	3	0	-2.16262	FALSE	low_coverage
Ctrl_SERIPH1st_1	Ctrl_Conv1st	ENSG00000085832.19	EPS15	chr1	51354262	51519387	-	165125	8428	156697	30	52.3786	75.4776	1.6054	1.31202	0.0296834	4.94355	0.528319	0.471681	1017	2314	0.43948	1.25265	TRUE	mature_mRNA_like
Ctrl_SERIPH1st_1	Ctrl_Conv1st	ENSG00000227070.3	EPS15-AS1	chr1	51518139	51600571	+	82432	4816	77589	12	0.261628	0	0.338038	0.009326	0.483142	-0.276549	1.34733	-0.347326	3	92	0.0325733	-3.2239	FALSE	low_coverage
Ctrl_SERIPH1st_1	Ctrl_Conv1st	ENSG00000117859.20	OSBPL9	chr1	51577178	51798427	+	221249	10354	210744	30	42.0106	25.3888	1.97738	2.93336	0.0448508	4.34135	0.804792	0.195208	1020	2843	0.358763	3.50897	TRUE	mature_mRNA_like
Ctrl_SERIPH1st_1	Ctrl_Conv1st	ENSG00000078618.24	NRDC	chr1	51787516	51878805	-	91289	8493	82729	35	68.2028	101.829	2.27759	1.76184	0.0322695	4.84437	0.936373	0.0636267	1527	2562	0.595995	1.86983	TRUE	mature_mRNA_like
Ctrl_SERIPH1st_1	Ctrl_Conv1st	ENSG00000169213.8	RAB3B	chr1	51907955	51990700	-	82745	13108	69637	4	9.79287	9.67473	0.274624	0.248764	0.02701	4.72287	0.425387	0.574613	29	492	0.0589311	3.08402	TRUE	mature_mRNA_like
Ctrl_SERIPH1st_1	Ctrl_Conv1st	ENSG00000117862.15	TXNDC12	chr1	52020129	52055772	-	35643	3485	32158	9	88.0146	103.208	5.85469	3.04377	0.0623042	3.88728	1.76157	-0.761569	409	1651	0.247714	1.89458	TRUE	mature_mRNA_like
Ctrl_SERIPH1st_1	Ctrl_Conv1st	ENSG00000198841.4	KTI12	chr1	52032102	52033810	-	1708	1708			68.5785	68.5785							137	527	0.259913	0.476782	TRUE	unclassified
Ctrl_SERIPH1st_1	Ctrl_Conv1st	ENSG00000228369.2	TXNDC12-AS1	chr1	52050917	52052683	+	1766	391	1375	2	0	0	0	0	0	0	0	1	0	0	0	0	FALSE	low_coverage
Ctrl_SERIPH1st_1	Ctrl_Conv1st	ENSG00000134717.19	BTF3L4	chr1	52056198	52090716	+	34518	6373	28145	8	46.3248	24.8998	5.41698	4.43313	0.104491	3.07294	0.620628	0.379372	393	1495	0.262859	1.59884	TRUE	mature_mRNA_like
Ctrl_SERIPH1st_1	Ctrl_Conv1st	ENSG00000157077.17	ZFYVE9	chr1	52141887	52348671	+	206784	8373	198411	20	40.8377	55.1981	1.6081	1.71378	0.037797	4.58296	0.505929	0.494071	463	2212	0.209303	0.714734	TRUE	mature_mRNA_like
Ctrl_SERIPH1st_1	Ctrl_Conv1st	ENSG00000154222.16	CC2D1B	chr1	52345722	52366318	-	20596	9714	10565	20	22.4656	29.8096	3.37075	2.81595	0.129962	2.70081	0.647111	0.352889	424	851	0.498179	-1.70809	TRUE	mature_mRNA_like
Ctrl_SERIPH1st_1	Ctrl_Conv1st	ENSG00000085840.14	ORC1	chr1	52372009	52404471	-	32462	4338	28124	16	60.2342	70.9333	2.54981	2.60453	0.0405479	4.50901	0.488234	0.511766	503	1113	0.451891	-0.233222	TRUE	mature_mRNA_like
Ctrl_SERIPH1st_1	Ctrl_Conv1st	ENSG00000134748.14	PRPF38A	chr1	52404059	52420836	+	16777	6041	10652	9	74.313	106.351	5.40687	5.01464	0.0677384	3.75625	0.540075	0.459925	629	1695	0.37107	1.19641	TRUE	mature_mRNA_like
Ctrl_SERIPH1st_1	Ctrl_Conv1st	ENSG00000134744.15	TUT4	chr1	52408281	52553487	-	145206	16531	128501	30	30.4587	29.5862	2.43144	1.97909	0.073702	3.59355	0.731216	0.268784	860	2734	0.314546	0.652036	TRUE	mature_mRNA_like
Ctrl_SERIPH1st_1	Ctrl_Conv1st	ENSG00000116157.6	GPX7	chr1	52602370	52609051	+	6681	1692	4989	2	0	0	0	0	0	0	0	1	0	0	0	0	FALSE	low_coverage
Ctrl_SERIPH1st_1	Ctrl_Conv1st	ENSG00000182183.15	SHISAL2A	chr1	52633167	52669683	+	36516	2684	33832	6	0	0	0	0	0	0	0	1	0	0	0	0	FALSE	low_coverage
Ctrl_SERIPH1st_1	Ctrl_Conv1st	ENSG00000162377.7	COA7	chr1	52684448	52698355	-	13907	4156	9751	3	79.6975	62.9721	2.50282	2.13734	0.0304108	4.9382	0.690427	0.309573	74	1194	0.0619714	4.20103	TRUE	mature_mRNA_like
Ctrl_SERIPH1st_1	Ctrl_Conv1st	ENSG00000162378.14	ZYG11B	chr1	52726446	52827336	+	100890	8325	92565	15	52.6189	51.9778	1.84887	1.52195	0.0338822	4.75761	0.566544	0.433456	321	2040	0.157345	1.86702	TRUE	mature_mRNA_like
Ctrl_SERIPH1st_1	Ctrl_Conv1st	ENSG00000203995.11	ZYG11A	chr1	52842510	52894998	+	52488	4694	47625	11	45.251	52.9447	5.10453	4.09237	0.101169	3.12329	0.606025	0.393975	265	1531	0.173078	0.894245	TRUE	mature_mRNA_like
Ctrl_SERIPH1st_1	Ctrl_Conv1st	ENSG00000121310.18	ECHDC2	chr1	52895909	52927212	-	31303	11596	19586	10	9.75172	9.83587	6.93123	9.31027	0.412992	0.4866	0.585046	0.414954	44	836	0.0526253	-0.364934	TRUE	pre_mRNA_like
Ctrl_SERIPH1st_1	Ctrl_Conv1st	ENSG00000116171.20	SCP2	chr1	52927275	53051698	+	124423	8347	116076	17	27.5772	26.836	0.835952	0.417415	0.0293181	4.88612	0.683245	0.316755	494	1091	0.452754	2.49843	TRUE	mature_mRNA_like
Ctrl_SERIPH1st_1	Ctrl_Conv1st	ENSG00000174348.15	PODN	chr1	53061292	53093681	+	32389	17166	15209	13	0	0	0	0	0	0	0	1	1	1	0.909091	0	FALSE	low_coverage
Ctrl_SERIPH1st_1	Ctrl_Conv1st	ENSG00000162383.13	SLC1A7	chr1	53087178	53142638	-	55460	5413	50047	10	0.111583	0	0.018103	0	0.0788163	0.841179	0.134011	0.865989	0	5	0	0.44681	FALSE	low_coverage
Ctrl_SERIPH1st_1	Ctrl_Conv1st	ENSG00000157184.8	CPT2	chr1	53196791	53214197	+	17406	10155	7169	5	11.3933	5.88781	1.66578	1.99632	0.126588	2.70241	0.980882	0.0191176	53	427	0.124093	1.64542	TRUE	mature_mRNA_like
Ctrl_SERIPH1st_1	Ctrl_Conv1st	ENSG00000162384.15	CZIB	chr1	53214098	53220652	-	6554	4522	1979	2	38.2921	64.3984	3.53259	3.29981	0.0842604	3.40174	0.256145	0.743855	155	605	0.256156	0.514954	TRUE	mature_mRNA_like
Ctrl_SERIPH1st_1	Ctrl_Conv1st	ENSG00000259818.1	CZIB-DT	chr1	53220662	53224253	+	3591	3591			0.968532	0.968532							0	12	0	-2.349	FALSE	low_coverage
Ctrl_SERIPH1st_1	Ctrl_Conv1st	ENSG00000162385.12	MAGOH	chr1	53226889	53238621	-	11732	1593	10139	5	48.5166	73.6327	4.80531	4.59358	0.08995	3.30903	0.617345	0.382655	120	422	0.284293	0.538263	TRUE	mature_mRNA_like
Ctrl_SERIPH1st_1	Ctrl_Conv1st	ENSG00000226754.4	MAGOH-DT	chr1	53238536	53246482	+	7946	2433	5505	3	2.30251	1	0.116621	0.109222	0.0462943	3.47129	0.341206	0.658794	3	21	0.14218	-4.51672	TRUE	mature_mRNA_like
Ctrl_SERIPH1st_1	Ctrl_Conv1st	ENSG00000157193.19	LRP8	chr1	53242363	53328469	-	86106	19668	66365	25	15.1623	12.8787	6.13144	4.64269	0.286599	1.29234	0.54487	0.45513	370	2357	0.156973	0.288405	TRUE	partially_spliced
Ctrl_SERIPH1st_1	Ctrl_Conv1st	ENSG00000225675.3	LRP8-DT	chr1	53328219	53363914	+	35695	1622	34073	4	0.451911	1.02564	0.102016	0.268541	0.156005	1.44997	0.641489	0.358511	1	14	0.070922	-2.0362	FALSE	low_coverage
Ctrl_SERIPH1st_1	Ctrl_Conv1st	ENSG00000293595.1	SLC25A3P1	chr1	53437034	53440020	-	2986	2781	205	1	0	0	0	0	0	0			1	1	0.909091	0	FALSE	low_coverage
Ctrl_SERIPH1st_1	Ctrl_Conv1st	ENSG00000143006.7	DMRTB1	chr1	53459398	53467488	+	8090	2440	5650	3	0	0	0	0	0	0	0	1	0	0	0	0	FALSE	low_coverage
Ctrl_SERIPH1st_1	Ctrl_Conv1st	ENSG00000174332.7	GLIS1	chr1	53506231	53739164	-	232933	3447	229486	12	3.047	1.85714	0.371456	0.335253	0.105574	2.73878	0.657472	0.342528	8	320	0.0249922	0.0193126	TRUE	mature_mRNA_like
Ctrl_SERIPH1st_1	Ctrl_Conv1st	ENSG00000058804.13	NDC1	chr1	53765459	53838560	-	73101	4856	68151	16	174.781	199.628	3.83821	3.39987	0.0214762	5.47269	0.415752	0.584248	1545	3704	0.417105	0.593513	TRUE	mature_mRNA_like
Ctrl_SERIPH1st_1	Ctrl_Conv1st	ENSG00000058799.16	YIPF1	chr1	53847530	53890683	-	43153	7517	35555	13	14.2722	28.8591	1.74321	1.376	0.108171	2.96298	0.579543	0.420457	174	565	0.30791	0.360134	TRUE	mature_mRNA_like
Ctrl_SERIPH1st_1	Ctrl_Conv1st	ENSG00000211452.12	DIO1	chr1	53891238	53911086	+	19848	2282	17566	6	0	0	0.0171924	0	0.146702	-0.228879	0.124884	0.875116	0	1	0	0	FALSE	low_coverage
Ctrl_SERIPH1st_1	Ctrl_Conv1st	ENSG00000081870.13	IFT25	chr1	53916573	53946588	-	30015	3669	26178	8	29.9011	14.3248	2.53262	2.29856	0.0778462	3.51044	0.68527	0.31473	280	587	0.47692	-0.619295	TRUE	mature_mRNA_like
Ctrl_SERIPH1st_1	Ctrl_Conv1st	ENSG00000116212.17	LRRC42	chr1	53946044	53968168	+	22124	3154	18859	7	26.6969	28.4494	1.72024	1.63886	0.060323	3.87987	0.255575	0.744425	171	389	0.439476	-0.285026	TRUE	mature_mRNA_like
Ctrl_SERIPH1st_1	Ctrl_Conv1st	ENSG00000203985.12	LDLRAD1	chr1	54007297	54018194	-	10897	2384	8513	5	0	0	0	0	0	0	0	1	0	0	0	0	FALSE	low_coverage
Ctrl_SERIPH1st_1	Ctrl_Conv1st	ENSG00000116209.13	TMEM59	chr1	54026680	54053504	-	26824	9332	17492	9	26.2458	47.1302	3.11411	2.90424	0.105707	3.03508	0.503528	0.496472	472	1000	0.471953	-0.262223	TRUE	mature_mRNA_like
Ctrl_SERIPH1st_1	Ctrl_Conv1st	ENSG00000116205.15	TCEANC2	chr1	54052866	54112519	+	59653	12407	47235	6	12.0006	14.7908	1.44687	1.38557	0.1068	2.96766	0.435862	0.564138	63	725	0.0868846	1.75405	TRUE	mature_mRNA_like
Ctrl_SERIPH1st_1	Ctrl_Conv1st	ENSG00000157211.12	CDCP2	chr1	54132686	54153770	-	21084	3510	17574	5	0.19943	0.105263	0.267099	0.3	0.471466	-0.29395	0.382913	0.617087	1	19	0.052356	0.245479	FALSE	low_coverage
Ctrl_SERIPH1st_1	Ctrl_Conv1st	ENSG00000215883.12	CYB5RL	chr1	54169650	54200073	-	30423	9470	20953	9	20.0445	14.5005	3.3799	2.51062	0.143677	2.53327	0.557719	0.442281	78	869	0.089748	2.055	TRUE	mature_mRNA_like
Ctrl_SERIPH1st_1	Ctrl_Conv1st	ENSG00000116221.16	MRPL37	chr1	54184040	54225464	+	41424	2549	38782	9	370.284	417.861	7.99154	9.2386	0.0211207	5.51646	0.674626	0.325374	2161	4177	0.517345	8.1397	TRUE	mature_mRNA_like
Ctrl_SERIPH1st_1	Ctrl_Conv1st	ENSG00000157216.18	SSBP3	chr1	54225431	54413479	-	188048	6930	181026	24	47.9315	33.62	2.96593	1.99844	0.0581584	3.96958	0.746083	0.253917	621	2904	0.213836	1.2969	TRUE	mature_mRNA_like
Ctrl_SERIPH1st_1	Ctrl_Conv1st	ENSG00000198711.5	SSBP3-AS1	chr1	54236439	54239063	+	2624	2624			0.179878	0.179878							0	2	0	1.42182	FALSE	low_coverage
Ctrl_SERIPH1st_1	Ctrl_Conv1st	ENSG00000162390.19	ACOT11	chr1	54542256	54639192	+	96936	10843	86093	19	1.33505	2.00758	0.354256	0.1819	0.197985	1.65953	0.891458	0.108542	11	150	0.0732845	-0.940872	TRUE	unclassified
Ctrl_SERIPH1st_1	Ctrl_Conv1st	ENSG00000162391.13	FAM151A	chr1	54609177	54623556	-	14379	2084	12295	8	0	0	0	0	0	0	0	1	0	0	0	0	FALSE	low_coverage
Ctrl_SERIPH1st_1	Ctrl_Conv1st	ENSG00000184313.21	MROH7	chr1	54641753	54710266	+	68513	9088	59425	25	0	0	0.0350862	0	0.259732	-0.433881	0.720078	0.279922	0	7	0	-0.585106	FALSE	low_coverage
Ctrl_SERIPH1st_1	Ctrl_Conv1st	ENSG00000243725.8	TTC4	chr1	54715834	54742657	+	26823	3532	23291	9	51.6065	91.237	4.43253	4.20123	0.0789563	3.51196	0.405555	0.594445	425	955	0.44498	-0.734225	TRUE	mature_mRNA_like
Ctrl_SERIPH1st_1	Ctrl_Conv1st	ENSG00000162396.7	PARS2	chr1	54756593	54764546	-	7953	3024	4929	1	22.7126	15.5013	2.65977	2.65977	0.104418	3.04721			3	277	0.0108264	2.41949	TRUE	mature_mRNA_like
Ctrl_SERIPH1st_1	Ctrl_Conv1st	ENSG00000006555.12	TTC22	chr1	54779711	54801323	-	21612	6111	15455	4	0	0	0	0	0	0	0	1	0	0	0	0	FALSE	low_coverage
Ctrl_SERIPH1st_1	Ctrl_Conv1st	ENSG00000162398.12	CIMAP2	chr1	54806062	54842252	+	36190	1777	34315	9	0	0	0.0176016	0	0.149671	-0.233907	0.0754321	0.924568	0	2	0	0	FALSE	low_coverage
Ctrl_SERIPH1st_1	Ctrl_Conv1st	ENSG00000116133.14	DHCR24	chr1	54849626	54887207	-	37581	6292	31289	14	191.992	99.3678	4.13756	2.42398	0.0210853	5.50242	0.780717	0.219283	1442	4461	0.323239	2.24956	TRUE	mature_mRNA_like
Ctrl_SERIPH1st_1	Ctrl_Conv1st	ENSG00000233203.8	DHCR24-DT	chr1	54886799	54992290	+	105491	5048	100419	7	1.32032	0	0.017168	0	0.011943	3.59957	1.78021	-0.780211	3	28	0.106762	-1.86821	TRUE	mature_mRNA_like
Ctrl_SERIPH1st_1	Ctrl_Conv1st	ENSG00000143001.7	TMEM61	chr1	54886832	54992296	+	105464	1825	103639	4	0.460822	0	0.0719419	0	0.113695	1.70562	0.288257	0.711743	3	28	0.106762	-1.85697	FALSE	low_coverage
Ctrl_SERIPH1st_1	Ctrl_Conv1st	ENSG00000162399.9	BSND	chr1	54998932	55017172	+	18240	9761	8479	3	0	0	0	0	0	0	0	1	0	0	0	0	FALSE	low_coverage
Ctrl_SERIPH1st_1	Ctrl_Conv1st	ENSG00000169174.14	PCSK9	chr1	55039444	55064852	+	25408	6108	19300	15	0.41241	0.084424	0.102124	0	0.166182	1.34206	1.33504	-0.335041	4	15	0.264901	1.19344	FALSE	low_coverage
Ctrl_SERIPH1st_1	Ctrl_Conv1st	ENSG00000162402.16	USP24	chr1	55066358	55215753	-	149395	12417	136888	69	97.0664	98.4437	3.77474	3.06255	0.0373955	4.64829	0.637908	0.362092	2876	5742	0.500862	1.85972	TRUE	mature_mRNA_like
Ctrl_SERIPH1st_1	Ctrl_Conv1st	ENSG00000231090.2	MIR4422HG	chr1	55217644	55324691	+	107047	2568	104479	2	0	0	0.00287107	0.001689	0.0279094	-0.0408373	0.0166095	0.983391	0	1	0	0.128839	FALSE	low_coverage
Ctrl_SERIPH1st_1	Ctrl_Conv1st	ENSG00000162407.10	PLPP3	chr1	56494760	56645301	-	150541	5346	145195	8	15.639	19.1511	1.02114	1.58008	0.0609266	3.81131	0.570001	0.429999	102	774	0.131766	4.00195	TRUE	mature_mRNA_like
Ctrl_SERIPH1st_1	Ctrl_Conv1st	ENSG00000162409.13	PRKAA2	chr1	56645313	56715335	+	70022	9355	60667	8	23.2191	34.7234	2.33865	1.8218	0.0911478	3.25736	0.479852	0.520148	177	1199	0.147611	1.76275	TRUE	mature_mRNA_like
Ctrl_SERIPH1st_1	Ctrl_Conv1st	ENSG00000187889.14	FYB2	chr1	56718788	56819696	-	100908	4726	96097	21	0	0	0	0	0	0	0	1	0	0	0	0	FALSE	low_coverage
Ctrl_SERIPH1st_1	Ctrl_Conv1st	ENSG00000157131.13	C8A	chr1	56854767	56918223	+	63456	4674	58782	11	0	0	0	0	0	0	0	1	0	0	0	0	FALSE	low_coverage
Ctrl_SERIPH1st_1	Ctrl_Conv1st	ENSG00000021852.15	C8B	chr1	56929098	56974383	-	45285	4117	41168	16	0	0	0	0	0	0	0	1	0	0	0	0	FALSE	low_coverage
Ctrl_SERIPH1st_1	Ctrl_Conv1st	ENSG00000173406.17	DAB1	chr1	56994777	58546734	-	1551957	9664	1542162	27	1.74617	0	0.27317	0.035112	0.128894	2.30663	2.17053	-1.17053	153	1471	0.104004	-2.37212	TRUE	mature_mRNA_like
Ctrl_SERIPH1st_1	Ctrl_Conv1st	ENSG00000226759.9	DAB1-AS1	chr1	57860531	57880907	+	20376	4342	15947	12	0	0	0	0	0	0	0	1	0	0	0	0	FALSE	low_coverage
Ctrl_SERIPH1st_1	Ctrl_Conv1st	ENSG00000162600.13	OMA1	chr1	58415383	58546838	-	131455	6241	125117	13	16.3368	24.7345	1.26828	1.31958	0.0716335	3.5865	0.626748	0.373252	145	881	0.164567	-1.67193	TRUE	mature_mRNA_like
Ctrl_SERIPH1st_1	Ctrl_Conv1st	ENSG00000184292.7	TACSTD2	chr1	58575432	58577252	-	1820	1820			0	0							0	0	0	0	FALSE	low_coverage
Ctrl_SERIPH1st_1	Ctrl_Conv1st	ENSG00000162601.13	MYSM1	chr1	58643439	58700090	-	56651	27812	28749	15	15.7155	13.0627	4.30231	1.80899	0.213855	1.84501	0.978667	0.0213332	285	1878	0.151749	0.454286	TRUE	partially_spliced
Ctrl_SERIPH1st_1	Ctrl_Conv1st	ENSG00000177606.9	JUN	chr1	58776844	58784048	-	7204	3624	3580	3	309.642	0	2.07961	0	0.00666922	7.15086	1.30519	-0.305188	6	3771	0.00159105	-12.0934	TRUE	mature_mRNA_like
Ctrl_SERIPH1st_1	Ctrl_Conv1st	ENSG00000234807.10	JUN-DT	chr1	58784165	59240555	+	456390	21091	435209	51	0.122801	0	0.018621	0	0.0771303	0.909398	0.390472	0.609528	0	36	0	-0.78328	FALSE	low_coverage
Ctrl_SERIPH1st_1	Ctrl_Conv1st	ENSG00000224609.9	FGGY-DT	chr1	59131924	59296538	-	164614	8158	156456	9	0.526354	0	0.0130709	0	0.0204417	2.46975	1.89937	-0.899369	0	21	0	-0.71327	FALSE	low_coverage
Ctrl_SERIPH1st_1	Ctrl_Conv1st	ENSG00000172456.19	FGGY	chr1	59295909	59810647	+	514738	12957	501531	38	0.634483	0.286387	0.143756	0.118334	0.163686	1.59129	0.938876	0.061124	19	269	0.0706057	-0.390978	FALSE	low_coverage
Ctrl_SERIPH1st_1	Ctrl_Conv1st	ENSG00000134709.14	HOOK1	chr1	59814785	59876369	+	61584	9562	51949	24	4.92261	8.01685	0.274269	0.091592	0.0517793	3.74629	1.12909	-0.129086	82	204	0.401764	1.06094	TRUE	mature_mRNA_like
Ctrl_SERIPH1st_1	Ctrl_Conv1st	ENSG00000134716.12	CYP2J2	chr1	59893307	59926822	-	33515	3022	30493	9	2.52151	2.50666	0.165349	0.092581	0.0593318	3.30443	0.53642	0.46358	13	42	0.308789	-0.322605	TRUE	mature_mRNA_like
Ctrl_SERIPH1st_1	Ctrl_Conv1st	ENSG00000162598.14	C1orf87	chr1	59987268	60073770	-	86502	4422	82080	15	0	0	0	0	0	0	0	1	0	0	0	0	FALSE	low_coverage
Ctrl_SERIPH1st_1	Ctrl_Conv1st	ENSG00000162599.19	NFIA	chr1	60865258	61462788	+	597530	59495	537960	26	9.46392	2.78028	1.65481	2.26294	0.147504	2.44629	0.615743	0.384257	287	4863	0.0590159	5.3294	TRUE	mature_mRNA_like
Ctrl_SERIPH1st_1	Ctrl_Conv1st	ENSG00000237928.7	NFIA-AS2	chr1	60912674	61056885	-	144211	6845	137366	13	0	0	0.00659568	0	0.0618757	-0.092149	0.550703	0.449297	0	3	0	-0.18854	FALSE	low_coverage
Ctrl_SERIPH1st_1	Ctrl_Conv1st	ENSG00000237853.7	NFIA-AS1	chr1	61248944	61253541	-	4597	873	3724	3	0	0	0	0	0	0	0	1	0	0	0	0	FALSE	low_coverage
Ctrl_SERIPH1st_1	Ctrl_Conv1st	ENSG00000162604.14	TM2D1	chr1	61673635	61725423	-	51788	5803	45985	11	16.9624	15.1806	3.87994	4.91963	0.185267	2.10001	0.641366	0.358634	185	927	0.199547	-0.714549	TRUE	partially_spliced
Ctrl_SERIPH1st_1	Ctrl_Conv1st	ENSG00000271200.1	PATJ-DT	chr1	61741997	61742424	-	427	427			0	0							0	0	0	0	FALSE	low_coverage
Ctrl_SERIPH1st_1	Ctrl_Conv1st	ENSG00000132849.22	PATJ	chr1	61742476	62178675	+	436199	11813	424288	48	9.57149	15.2488	0.550645	0.533617	0.0538679	3.8938	0.572693	0.427307	303	1158	0.261635	-0.744984	TRUE	mature_mRNA_like
Ctrl_SERIPH1st_1	Ctrl_Conv1st	ENSG00000240563.4	L1TD1	chr1	62194256	62235060	+	40804	7741	32971	9	0	0	0	0	0	0	0	1	0	0	0	0	FALSE	low_coverage
Ctrl_SERIPH1st_1	Ctrl_Conv1st	ENSG00000132854.20	KANK4	chr1	62236164	62319434	-	83270	7117	76153	11	0.0424336	0	0	0	0	0.510289	0	1	0	1	0	0.164649	FALSE	low_coverage
Ctrl_SERIPH1st_1	Ctrl_Conv1st	ENSG00000162607.14	USP1	chr1	62436040	62451804	+	15764	7024	8740	7	67.6351	86.2867	6.90114	4.4331	0.0924637	3.27424	0.643402	0.356598	468	1790	0.261438	1.23605	TRUE	mature_mRNA_like
Ctrl_SERIPH1st_1	Ctrl_Conv1st	ENSG00000116641.19	DOCK7	chr1	62454297	62688464	-	234167	24968	208990	57	16.4579	42.5193	0.985669	0.781848	0.0561841	3.93086	0.729935	0.270065	1161	2060	0.563565	-0.052332	TRUE	mature_mRNA_like
Ctrl_SERIPH1st_1	Ctrl_Conv1st	ENSG00000132855.6	ANGPTL3	chr1	62597463	62607196	+	9733	4310	5423	5	0	0	0	0	0	0	0	1	0	0	0	0	FALSE	low_coverage
Ctrl_SERIPH1st_1	Ctrl_Conv1st	ENSG00000235545.2	DOCK7-DT	chr1	62688481	62748354	+	59873	2066	57807	3	0.644724	0.735039	0.652707	1.09025	0.467076	-0.0153812	0.475206	0.524794	0	131	0	-2.71685	TRUE	pre_mRNA_like
Ctrl_SERIPH1st_1	Ctrl_Conv1st	ENSG00000125703.16	ATG4C	chr1	62783820	62865999	+	82179	4989	77190	15	18.2788	27.7737	2.22709	2.04307	0.10808	2.98145	0.419628	0.580372	182	877	0.207502	-0.243923	TRUE	mature_mRNA_like
Ctrl_SERIPH1st_1	Ctrl_Conv1st	ENSG00000230798.8	FOXD3-AS1	chr1	63320055	63324801	-	4746	3790	949	4	2.51266	1.30825	0.917808	1.39048	0.259968	1.36006	1.02285	-0.0228485	4	35	0.11396	0.899485	TRUE	partially_spliced
Ctrl_SERIPH1st_1	Ctrl_Conv1st	ENSG00000142856.19	ITGB3BP	chr1	63320883	63593721	-	272838	8144	264694	19	11.2515	9.57172	1.09591	2.69259	0.0880432	3.2467	0.867671	0.132329	118	1279	0.0922524	-0.858965	TRUE	mature_mRNA_like
Ctrl_SERIPH1st_1	Ctrl_Conv1st	ENSG00000187140.6	FOXD3	chr1	63322566	63325128	+	2562	2562			13.5059	13.5059							0	115	0	1.22756	TRUE	unclassified
Ctrl_SERIPH1st_1	Ctrl_Conv1st	ENSG00000088035.19	ALG6	chr1	63367574	63438553	+	70979	5487	65443	16	15.7115	19.8503	1.13765	1.08009	0.0671212	3.6753	0.680287	0.319713	188	538	0.349377	0.552206	TRUE	mature_mRNA_like
Ctrl_SERIPH1st_1	Ctrl_Conv1st	ENSG00000203965.14	EFCAB7	chr1	63523371	63572693	+	49322	5789	43508	14	10.3588	11.4881	1.08284	1.25473	0.0938201	3.14439	0.50811	0.49189	146	357	0.408849	-0.888606	TRUE	mature_mRNA_like
Ctrl_SERIPH1st_1	Ctrl_Conv1st	ENSG00000116652.7	DLEU2L	chr1	63547081	63550636	+	3555	3555			1.34571	1.34571							17	33	0.513595	-2.31717	TRUE	unclassified
Ctrl_SERIPH1st_1	Ctrl_Conv1st	ENSG00000079739.18	PGM1	chr1	63593240	63660245	+	67005	4412	62519	15	32.7813	41.9924	1.27267	1.14115	0.0372627	4.58221	0.614257	0.385743	275	748	0.367598	0.153295	TRUE	mature_mRNA_like
Ctrl_SERIPH1st_1	Ctrl_Conv1st	ENSG00000185483.13	ROR1	chr1	63774016	64181498	+	407482	6718	400764	9	17.7504	27.7868	1.10164	1.03675	0.0581278	3.89288	0.819853	0.180147	94	1870	0.0502647	-0.165727	TRUE	mature_mRNA_like
Ctrl_SERIPH1st_1	Ctrl_Conv1st	ENSG00000223949.9	ROR1-AS1	chr1	64094378	64171342	-	76964	4637	72145	6	0	0	0.00370073	0	0.0356866	-0.052426	0.0171963	0.982804	0	1	0	-0.157876	FALSE	low_coverage
Ctrl_SERIPH1st_1	Ctrl_Conv1st	ENSG00000177414.14	UBE2U	chr1	64203622	64267368	+	63746	1842	61904	11	0	0	0	0	0	0	0	1	0	0	0	0	FALSE	low_coverage
Ctrl_SERIPH1st_1	Ctrl_Conv1st	ENSG00000158966.17	CACHD1	chr1	64469764	64693058	+	223294	7386	215818	28	56.5244	85.2403	3.00783	2.65953	0.0504397	4.18744	0.404853	0.595147	920	3562	0.258275	0.785532	TRUE	mature_mRNA_like
Ctrl_SERIPH1st_1	Ctrl_Conv1st	ENSG00000162437.16	RAVER2	chr1	64744860	64833233	+	88373	6320	82053	11	45.1733	80.5546	2.98787	2.75149	0.0619106	3.87397	0.586108	0.413892	421	1770	0.23784	1.46218	TRUE	mature_mRNA_like
Ctrl_SERIPH1st_1	Ctrl_Conv1st	ENSG00000162434.15	JAK1	chr1	64833222	65067754	-	234532	13686	220720	40	39.6386	24.5008	2.57459	1.5942	0.0608461	3.89315	0.94363	0.0563703	1146	3706	0.30922	0.954525	TRUE	mature_mRNA_like
Ctrl_SERIPH1st_1	Ctrl_Conv1st	ENSG00000162433.16	AK4	chr1	65146901	65232145	+	85244	7854	77366	7	61.8072	55.891	2.58174	2.48825	0.0400338	4.52887	0.465858	0.534142	343	2283	0.150234	1.63526	TRUE	mature_mRNA_like
Ctrl_SERIPH1st_1	Ctrl_Conv1st	ENSG00000116675.16	DNAJC6	chr1	65248218	65415871	+	167653	6958	160598	21	23.2156	32.44	1.25982	0.723368	0.0512636	4.0998	1.22454	-0.224539	333	1212	0.27473	0.635737	TRUE	mature_mRNA_like
Ctrl_SERIPH1st_1	Ctrl_Conv1st	ENSG00000229294.1	DNAJC6-AS1	chr1	65279455	65306521	-	27066	512	26554	1	0	0	0	0	0	0			0	0	0	0	FALSE	low_coverage
Ctrl_SERIPH1st_1	Ctrl_Conv1st	ENSG00000213625.9	LEPROT	chr1	65420586	65436007	+	15421	5237	10184	5	24.0808	12.2926	3.84368	3.71652	0.137154	2.61625	0.316283	0.683717	55	556	0.0989031	3.12185	TRUE	mature_mRNA_like
Ctrl_SERIPH1st_1	Ctrl_Conv1st	ENSG00000116678.20	LEPR	chr1	65420651	65641559	+	220908	11370	209538	23	11.2881	30.063	1.38894	0.635514	0.108705	2.93518	0.801278	0.198722	285	1399	0.203702	-0.268513	TRUE	mature_mRNA_like
Ctrl_SERIPH1st_1	Ctrl_Conv1st	ENSG00000184588.18	PDE4B	chr1	65792513	66374579	+	582066	8930	573044	26	0.356103	0	0.0210122	0	0.0440401	1.91421	0.329851	0.670149	3	51	0.0587084	0.0832327	FALSE	low_coverage
Ctrl_SERIPH1st_1	Ctrl_Conv1st	ENSG00000227466.1	PDE4B-AS1	chr1	66042499	66050718	-	8219	456	7763	2	0	0	0	0	0	0	0	1	0	0	0	0	FALSE	low_coverage
Ctrl_SERIPH1st_1	Ctrl_Conv1st	ENSG00000118473.24	SGIP1	chr1	66533266	66751139	+	217873	25708	192119	30	0	0	0	0	0	0	0	1	0	0	0	0	FALSE	low_coverage
Ctrl_SERIPH1st_1	Ctrl_Conv1st	ENSG00000152760.11	DYNLT5	chr1	66751740	66779051	+	27311	3402	23909	9	0	0	0	0	0	0	0	1	0	0	0	0	FALSE	low_coverage
Ctrl_SERIPH1st_1	Ctrl_Conv1st	ENSG00000172410.5	INSL5	chr1	66797739	66801276	-	3537	736	2801	1	0	0	0	0	0	0			0	0	0	0	FALSE	low_coverage
Ctrl_SERIPH1st_1	Ctrl_Conv1st	ENSG00000152763.18	DNAI4	chr1	66812884	66924890	-	112006	6727	105279	21	1.28661	0	0.496481	0.0702	0.263653	1.21701	2.37308	-1.37308	12	204	0.0587947	-3.64905	TRUE	unclassified
Ctrl_SERIPH1st_1	Ctrl_Conv1st	ENSG00000198160.15	MIER1	chr1	66924894	66988619	+	63725	8273	55452	17	16.6215	20.7377	5.09053	4.51891	0.233381	1.68775	0.71359	0.28641	197	1408	0.139905	0.216979	TRUE	partially_spliced
Ctrl_SERIPH1st_1	Ctrl_Conv1st	ENSG00000116704.9	SLC35D1	chr1	66999349	67054159	-	54810	6285	48427	11	31.4305	38.9892	3.08322	2.7821	0.0890749	3.30819	0.554038	0.445962	138	1163	0.118648	1.01296	TRUE	mature_mRNA_like
Ctrl_SERIPH1st_1	Ctrl_Conv1st	ENSG00000203963.12	C1orf141	chr1	67092164	67231853	-	139689	5022	134667	9	0	0	0.00224282	0	0.0219363	-0.0319996	0.0097651	0.990235	0	1	0	-0.10039	FALSE	low_coverage
Ctrl_SERIPH1st_1	Ctrl_Conv1st	ENSG00000162594.17	IL23R	chr1	67138906	67259979	+	121073	4561	116512	14	0	0	0	0	0	0	0	1	0	0	0	0	FALSE	low_coverage
Ctrl_SERIPH1st_1	Ctrl_Conv1st	ENSG00000081985.15	IL12RB2	chr1	67307363	67398724	+	91361	7703	83541	18	0.335973	0	0.0232461	0	0.0506209	1.8227	0.257536	0.742464	5	15	0.331126	-0.308711	FALSE	low_coverage
Ctrl_SERIPH1st_1	Ctrl_Conv1st	ENSG00000142864.16	SERBP1	chr1	67407809	67430415	-	22606	7727	14783	8	246.388	321.981	21.1683	17.6924	0.0790877	3.53474	0.320687	0.679313	1720	7439	0.231211	1.10551	TRUE	mature_mRNA_like
Ctrl_SERIPH1st_1	Ctrl_Conv1st	ENSG00000116717.13	GADD45A	chr1	67685200	67688334	+	3134	1925	1209	2	18.5138	17.2629	7.14309	6.46951	0.277328	1.36169	0.132578	0.867422	59	148	0.398379	2.11378	TRUE	partially_spliced
Ctrl_SERIPH1st_1	Ctrl_Conv1st	ENSG00000172380.7	GNG12	chr1	67701465	67833476	-	132011	9850	122161	19	25.3618	1.96288	1.62221	1.39731	0.0598955	3.886	0.551991	0.448009	47	1491	0.0315204	2.05295	TRUE	mature_mRNA_like
Ctrl_SERIPH1st_1	Ctrl_Conv1st	ENSG00000232284.10	GNG12-AS1	chr1	67832192	68202987	+	370795	6085	364710	21	0.128677	0	0.0719338	0.02574	0.239292	0.411458	0.555776	0.444224	1	90	0.0110988	-0.438838	FALSE	low_coverage
Ctrl_SERIPH1st_1	Ctrl_Conv1st	ENSG00000162595.9	DIRAS3	chr1	68045885	68051717	-	5832	2840	2992	2	0.609507	0.55812	0.100935	0.054375	0.124544	1.82009	0.352227	0.647773	0	8	0	0.598468	FALSE	low_coverage
Ctrl_SERIPH1st_1	Ctrl_Conv1st	ENSG00000116729.15	WLS	chr1	68098472	68233120	-	134648	4469	130130	18	84.1904	79.1281	4.73018	4.55352	0.0531358	4.12522	0.398718	0.601282	822	3311	0.248256	0.232276	TRUE	mature_mRNA_like
Ctrl_SERIPH1st_1	Ctrl_Conv1st	ENSG00000116745.8	RPE65	chr1	68428821	68451103	-	22282	4307	17975	13	0	0	0	0	0	0	0	1	0	0	0	0	FALSE	low_coverage
Ctrl_SERIPH1st_1	Ctrl_Conv1st	ENSG00000024526.18	DEPDC1	chr1	68474151	68497230	-	23079	5913	17166	11	65.9058	94.8711	5.10637	3.21339	0.0718073	3.66424	1.16268	-0.162684	623	1594	0.390816	1.1057	TRUE	mature_mRNA_like
Ctrl_SERIPH1st_1	Ctrl_Conv1st	ENSG00000233589.1	DEPDC1-AS2	chr1	68479128	68483539	+	4411	960	3451	1	0	0	0	0	0	0			0	0	0	0	FALSE	low_coverage
Ctrl_SERIPH1st_1	Ctrl_Conv1st	ENSG00000234264.2	DEPDC1-AS1	chr1	68496670	68538627	+	41957	1252	40705	2	0	0	0.155804	0.208486	0.609075	-1.35504	0.284885	0.715115	0	21	0	0.668927	FALSE	low_coverage
Ctrl_SERIPH1st_1	Ctrl_Conv1st	ENSG00000033122.22	LRRC7	chr1	69567921	70151945	+	584024	30043	553981	31	0.245215	0	0.0541428	0.008584	0.135575	1.16323	0.52574	0.47426	5	124	0.0402901	-0.300157	FALSE	low_coverage
Ctrl_SERIPH1st_1	Ctrl_Conv1st	ENSG00000293134.1	PIN1P1	chr1	69919321	69920317	+	996	996			0	0							0	0	0	0	FALSE	low_coverage
Ctrl_SERIPH1st_1	Ctrl_Conv1st	ENSG00000237919.5	LRRC7-AS1	chr1	70013981	70031222	-	17241	948	16293	3	0	0	0	0	0	0	0	1	0	0	0	0	FALSE	low_coverage
Ctrl_SERIPH1st_1	Ctrl_Conv1st	ENSG00000066557.7	LRRC40	chr1	70143410	70205639	-	62229	4451	57778	16	32.6115	52.1481	2.56168	2.15987	0.072624	3.61939	0.952902	0.0470977	355	979	0.362578	0.525297	TRUE	mature_mRNA_like
Ctrl_SERIPH1st_1	Ctrl_Conv1st	ENSG00000116754.15	SRSF11	chr1	70205669	70253052	+	47383	8608	38775	14	69.7878	61.2195	10.6267	10.5706	0.131985	2.70383	0.842963	0.157037	1076	3381	0.31824	1.77279	TRUE	mature_mRNA_like
Ctrl_SERIPH1st_1	Ctrl_Conv1st	ENSG00000118454.14	ANKRD13C	chr1	70258998	70354734	-	95736	6442	89294	15	34.2035	32.5954	2.74724	2.61788	0.074148	3.59072	0.364008	0.635992	209	1553	0.13457	-0.494697	TRUE	mature_mRNA_like
Ctrl_SERIPH1st_1	Ctrl_Conv1st	ENSG00000197568.16	ANKRD13C-DT	chr1	70354779	70385339	+	30560	1332	29228	5	26.6967	15.921	0.417032	0.753772	0.0153243	5.69566	0.780447	0.219553	61	160	0.381012	-4.4563	TRUE	mature_mRNA_like
Ctrl_SERIPH1st_1	Ctrl_Conv1st	ENSG00000116761.13	CTH	chr1	70406193	70442771	+	36578	5555	31023	13	10.236	10.0682	1.00928	1.36952	0.0889606	3.21998	0.700541	0.299459	72	297	0.242343	1.20679	TRUE	mature_mRNA_like
Ctrl_SERIPH1st_1	Ctrl_Conv1st	ENSG00000235782.2	PTGER3-AS1	chr1	70838905	70951493	+	112588	1149	111439	3	0	0	0	0	0	0	0	1	0	0	0	0	FALSE	low_coverage
Ctrl_SERIPH1st_1	Ctrl_Conv1st	ENSG00000050628.22	PTGER3	chr1	70852352	71047816	-	195464	10287	185177	9	0.699816	0	0.0328768	0.007352	0.0394826	2.58958	1.11822	-0.118221	8	46	0.173536	-1.34303	FALSE	low_coverage
Ctrl_SERIPH1st_1	Ctrl_Conv1st	ENSG00000235079.2	ZRANB2-AS1	chr1	71047496	71067483	+	19987	2295	17692	3	0	0	0	0	0	0	0	1	0	0	0	0	FALSE	low_coverage
Ctrl_SERIPH1st_1	Ctrl_Conv1st	ENSG00000132485.15	ZRANB2	chr1	71063250	71081289	-	18039	5055	12924	8	96.3753	142.568	16.657	8.41668	0.147235	2.5254	0.891892	0.108108	938	2343	0.400324	0.458636	TRUE	mature_mRNA_like
Ctrl_SERIPH1st_1	Ctrl_Conv1st	ENSG00000229956.12	ZRANB2-DT	chr1	71081323	71489976	+	408653	16141	392365	35	0.514714	0	0.267865	0.08426	0.303503	0.740737	1.00143	-0.00143206	4	380	0.0105235	-2.18074	FALSE	low_coverage
Ctrl_SERIPH1st_1	Ctrl_Conv1st	ENSG00000172260.15	NEGR1	chr1	71395942	72282539	-	886597	13208	873389	9	0.208964	0	0.0455159	0.016545	0.128402	1.08626	0.294637	0.705363	1	142	0.0070373	-0.6231	FALSE	low_coverage
Ctrl_SERIPH1st_1	Ctrl_Conv1st	ENSG00000228853.1	NEGR1-IT1	chr1	71794231	71837012	-	42781	534	42247	2	0	0	0	0	0	0	0	1	0	0	0	0	FALSE	low_coverage
Ctrl_SERIPH1st_1	Ctrl_Conv1st	ENSG00000162620.16	LRRIQ3	chr1	74026014	74198187	-	172173	8759	163414	10	1.07649	0	0.122731	0.0105815	0.094465	2.40112	0.774566	0.225434	12	98	0.122324	-2.63671	TRUE	mature_mRNA_like
Ctrl_SERIPH1st_1	Ctrl_Conv1st	ENSG00000254685.9	FPGT	chr1	74198237	74234086	+	35849	5622	30227	5	6.62522	5.58546	0.622423	0.610348	0.0847106	3.21867	0.694183	0.305817	25	187	0.133618	-4.14642	TRUE	mature_mRNA_like
Ctrl_SERIPH1st_1	Ctrl_Conv1st	ENSG00000116783.16	TNNI3K	chr1	74235284	74544432	+	309148	4839	304129	27	0.257285	0	0.0454643	0	0.112885	1.29641	0.641585	0.358415	4	50	0.0798403	-0.587303	FALSE	low_coverage
Ctrl_SERIPH1st_1	Ctrl_Conv1st	ENSG00000162621.7	LRRC53	chr1	74469375	74512611	-	43236	4358	38878	4	0	0	0	0	0	0	0	1	0	0	0	0	FALSE	low_coverage
Ctrl_SERIPH1st_1	Ctrl_Conv1st	ENSG00000178965.14	ERICH3	chr1	74568116	74673792	-	105676	8827	96849	19	0	0	0.00311822	0	0.0302393	-0.0442993	0.0277054	0.972295	0	1	0	-0.131269	FALSE	low_coverage
Ctrl_SERIPH1st_1	Ctrl_Conv1st	ENSG00000234497.6	ERICH3-AS1	chr1	74577429	74626098	+	48669	5528	43141	5	0	0	0	0	0	0	0	1	0	0	0	0	FALSE	low_coverage
Ctrl_SERIPH1st_1	Ctrl_Conv1st	ENSG00000116791.15	CRYZ	chr1	74701487	74733104	-	31617	11196	20330	12	8.38746	6.87047	1.11653	1.03363	0.116257	2.80256	0.824577	0.175423	189	389	0.485736	0.944405	TRUE	mature_mRNA_like
Ctrl_SERIPH1st_1	Ctrl_Conv1st	ENSG00000162623.17	TYW3	chr1	74733151	74767555	+	34404	5122	29282	12	36.5396	16.6688	4.55604	4.25905	0.110595	2.97623	0.856195	0.143805	235	1070	0.219606	0.0418187	TRUE	mature_mRNA_like
Ctrl_SERIPH1st_1	Ctrl_Conv1st	ENSG00000162624.17	LHX8	chr1	75128433	75161533	+	33100	5092	28008	11	1.07364	1.08723	0.308733	0.150174	0.208269	1.52176	0.904064	0.0959357	7	47	0.14862	1.00662	TRUE	partially_spliced
Ctrl_SERIPH1st_1	Ctrl_Conv1st	ENSG00000224149.1	LHX8-AS1	chr1	75129973	75132576	-	2603	2203	400	1	0	0	0	0	0	0			0	0	0	0	FALSE	low_coverage
Ctrl_SERIPH1st_1	Ctrl_Conv1st	ENSG00000137968.17	SLC44A5	chr1	75202128	75611114	-	408986	6299	402687	26	13.2073	18.23	0.822681	0.843562	0.0582222	3.85025	1.12853	-0.128528	143	1386	0.103167	1.17878	TRUE	mature_mRNA_like
Ctrl_SERIPH1st_1	Ctrl_Conv1st	ENSG00000117054.16	ACADM	chr1	75724430	75787575	+	63145	13865	49188	13	14.0035	9.87127	2.88255	2.04741	0.169702	2.24143	2.36468	-1.36468	468	1229	0.380766	-0.485696	TRUE	partially_spliced
Ctrl_SERIPH1st_1	Ctrl_Conv1st	ENSG00000137955.17	RABGGTB	chr1	75786187	75795086	+	8899	5935	2964	6	72.0581	82.0017	31.052	20.8376	0.300862	1.21184	0.647908	0.352092	572	1739	0.328906	-0.474641	TRUE	partially_spliced
Ctrl_SERIPH1st_1	Ctrl_Conv1st	ENSG00000057468.7	MSH4	chr1	75796881	75913242	+	116361	3270	113091	19	0.577676	0	0.147297	0	0.178548	1.45435	1.56518	-0.565177	1	62	0.0161031	-1.89968	FALSE	low_coverage
Ctrl_SERIPH1st_1	Ctrl_Conv1st	ENSG00000154007.7	ASB17	chr1	75918872	75932404	-	13532	1080	12452	2	0	0	0	0	0	0	0	1	0	0	0	0	FALSE	low_coverage
Ctrl_SERIPH1st_1	Ctrl_Conv1st	ENSG00000184005.12	ST6GALNAC3	chr1	76074745	76634603	+	559858	7200	552658	5	3.59417	5.64654	0.434958	0.297108	0.105339	2.78775	0.591653	0.408347	17	887	0.0191636	-1.24721	TRUE	mature_mRNA_like
Ctrl_SERIPH1st_1	Ctrl_Conv1st	ENSG00000117069.16	ST6GALNAC5	chr1	76867446	77067546	+	200100	6092	194008	6	1.39314	1.60244	0.3024	0.273545	0.168417	1.89165	1.03778	-0.03778	12	224	0.0535475	-1.24038	TRUE	unclassified
Ctrl_SERIPH1st_1	Ctrl_Conv1st	ENSG00000142892.16	PIGK	chr1	77088986	77219508	-	130522	5768	124754	12	28.6378	57.134	1.48786	1.25073	0.0492251	4.17779	0.466094	0.533906	332	1172	0.283252	0.0807022	TRUE	mature_mRNA_like
Ctrl_SERIPH1st_1	Ctrl_Conv1st	ENSG00000154027.19	AK5	chr1	77282018	77559966	+	277948	6948	271000	19	1.48187	0.962769	0.061561	0.041115	0.0374589	3.29148	0.399818	0.600182	20	90	0.221976	-0.572904	TRUE	mature_mRNA_like
Ctrl_SERIPH1st_1	Ctrl_Conv1st	ENSG00000233099.2	AK5-AS1	chr1	77346045	77412951	-	66906	1084	65822	4	0	0	0.00458806	0	0.0438679	-0.0647182	0.0252058	0.974794	0	1	0	0.202228	FALSE	low_coverage
Ctrl_SERIPH1st_1	Ctrl_Conv1st	ENSG00000036549.14	ZZZ3	chr1	77562415	77683422	-	121007	10266	110654	16	33.7409	40.8264	3.90352	2.88864	0.10342	3.07943	0.715211	0.284789	533	2604	0.204677	0.651268	TRUE	mature_mRNA_like
Ctrl_SERIPH1st_1	Ctrl_Conv1st	ENSG00000077254.15	USP33	chr1	77694724	77759884	-	65160	8264	56706	25	40.7119	45.5799	2.59775	1.86292	0.0598427	3.91916	0.818102	0.181898	683	1620	0.421579	1.05031	TRUE	mature_mRNA_like
Ctrl_SERIPH1st_1	Ctrl_Conv1st	ENSG00000180488.18	MIGA1	chr1	77779623	77879540	+	99917	10419	89472	15	10.7954	17.0224	1.73393	1.52274	0.137294	2.57071	0.641942	0.358058	202	899	0.224669	0.163457	TRUE	mature_mRNA_like
Ctrl_SERIPH1st_1	Ctrl_Conv1st	ENSG00000235927.4	NEXN-AS1	chr1	77881347	77889539	-	8192	2292	5900	2	0.474694	0	0.371865	0.192422	0.392859	0.284422	0.658029	0.341971	0	11	0	-0.73401	FALSE	low_coverage
Ctrl_SERIPH1st_1	Ctrl_Conv1st	ENSG00000162614.20	NEXN	chr1	77888479	77943895	+	55416	4555	50775	12	0.641712	0	0.229621	0.0450055	0.236398	1.17005	0.759999	0.240001	2	49	0.0407332	-0.38864	FALSE	low_coverage
Ctrl_SERIPH1st_1	Ctrl_Conv1st	ENSG00000162613.19	FUBP1	chr1	77944054	77979527	-	35473	8036	27044	16	138.466	301.348	13.5448	10.5086	0.0890459	3.34414	0.49367	0.50633	2623	4964	0.528394	1.7316	TRUE	mature_mRNA_like
Ctrl_SERIPH1st_1	Ctrl_Conv1st	ENSG00000162616.10	DNAJB4	chr1	77979069	78018529	+	39460	6325	33135	7	12.5619	11.9278	6.19158	6.04873	0.328405	1.009	0.679746	0.320254	23	955	0.0240812	-1.43425	TRUE	unclassified
Ctrl_SERIPH1st_1	Ctrl_Conv1st	ENSG00000137960.7	GIPC2	chr1	77979541	78138448	+	158907	4190	154717	7	1.08998	0	1.79986	0	0.601993	-0.674961	2.07578	-1.07578	25	974	0.0256647	-5.74537	TRUE	unclassified
Ctrl_SERIPH1st_1	Ctrl_Conv1st	ENSG00000237413.6	MGC27382	chr1	78222432	78369464	+	147032	3509	143523	14	0	0	0.0016723	0	0.016448	-0.0239267	0.0126649	0.987335	0	1	0	0	FALSE	low_coverage
Ctrl_SERIPH1st_1	Ctrl_Conv1st	ENSG00000122420.11	PTGFR	chr1	78303883	78540701	+	236818	6224	230594	8	0	0	0.00496988	0	0.0473458	-0.0699754	0.384243	0.615757	0	4	0	0.125223	FALSE	low_coverage
Ctrl_SERIPH1st_1	Ctrl_Conv1st	ENSG00000137959.18	IFI44L	chr1	78619901	78646145	+	26244	12017	14150	9	0.150786	0	0.0638869	0	0.203026	0.613759	0.596161	0.403839	4	9	0.43956	-0.281717	FALSE	low_coverage
Ctrl_SERIPH1st_1	Ctrl_Conv1st	ENSG00000137965.12	IFI44	chr1	78647077	78664412	+	17335	3497	13838	9	0	0	0	0	0	0	0	1	0	0	0	0	FALSE	low_coverage
Ctrl_SERIPH1st_1	Ctrl_Conv1st	ENSG00000162618.16	ADGRL4	chr1	78889763	79282124	-	392361	5828	386353	26	0	0	0	0	0	0	0	1	0	0	0	0	FALSE	low_coverage
Ctrl_SERIPH1st_1	Ctrl_Conv1st	ENSG00000117114.22	ADGRL2	chr1	81306111	81993940	+	687829	26490	661339	40	27.4475	5.44301	0.686456	0.765694	0.0243132	5.13041	1.17986	-0.179863	1056	3943	0.26781	5.7606	TRUE	mature_mRNA_like
Ctrl_SERIPH1st_1	Ctrl_Conv1st	ENSG00000137941.18	TTLL7	chr1	83865023	83999164	-	134141	10586	123469	30	7.87682	14.6381	1.05157	0.562505	0.116473	2.79221	0.900526	0.0994737	180	711	0.253129	-0.550955	TRUE	mature_mRNA_like
Ctrl_SERIPH1st_1	Ctrl_Conv1st	ENSG00000233061.1	TTLL7-IT1	chr1	83979117	83984300	-	5183	2921	2262	1	2.42212	2.06261	1.85146	1.85146	0.423329	0.370081			20	58	0.344234	0.243133	TRUE	partially_spliced
Ctrl_SERIPH1st_1	Ctrl_Conv1st	ENSG00000271576.3	PRKACB-DT	chr1	84076328	84078555	-	2227	2082	106	1	9.09174	0	0	0	0	6.52227			0	63	0	5.88582	TRUE	mature_mRNA_like
Ctrl_SERIPH1st_1	Ctrl_Conv1st	ENSG00000142875.22	PRKACB	chr1	84078061	84238498	+	160437	6931	153506	19	16.654	6.2057	1.52601	0.614802	0.0834794	3.3651	0.790593	0.209407	134	1168	0.114716	-0.428069	TRUE	mature_mRNA_like
Ctrl_SERIPH1st_1	Ctrl_Conv1st	ENSG00000203943.9	SAMD13	chr1	84298365	84389957	+	91592	3405	88187	9	1.92893	0.704981	0.188418	0.221931	0.0849745	2.81449	1.36284	-0.362841	3	77	0.0389105	-2.11493	TRUE	mature_mRNA_like
Ctrl_SERIPH1st_1	Ctrl_Conv1st	ENSG00000137976.8	DNASE2B	chr1	84398483	84415018	+	16535	1524	15011	5	0	0	0	0	0	0	0	1	0	0	0	0	FALSE	low_coverage
Ctrl_SERIPH1st_1	Ctrl_Conv1st	ENSG00000117133.12	RPF1	chr1	84479256	84498352	+	19096	2292	16804	8	80.5951	151.753	3.94186	3.23384	0.0465737	4.31939	0.422269	0.577731	488	837	0.582965	1.13977	TRUE	mature_mRNA_like
Ctrl_SERIPH1st_1	Ctrl_Conv1st	ENSG00000174021.13	GNG5	chr1	84498283	84507237	-	8954	5574	3294	3	66.2384	11.6817	3.77656	4.2449	0.0538624	4.09699	0.258721	0.741279	1078	1275	0.845424	-0.878339	TRUE	mature_mRNA_like
Ctrl_SERIPH1st_1	Ctrl_Conv1st	ENSG00000122432.19	SPATA1	chr1	84506299	84567379	+	61080	4365	56620	17	0.096449	0	0.0299011	0	0.132101	0.596741	1.36903	-0.369033	0	7	0	-0.867151	FALSE	low_coverage
Ctrl_SERIPH1st_1	Ctrl_Conv1st	ENSG00000117151.14	CTBS	chr1	84549610	84574480	-	24870	6960	17910	6	4.06135	15.629	1.19587	0.841967	0.223226	1.68313	0.808215	0.191785	67	174	0.384836	-1.19794	TRUE	partially_spliced
Ctrl_SERIPH1st_1	Ctrl_Conv1st	ENSG00000117155.18	SSX2IP	chr1	84643705	84690955	-	47250	12682	34568	15	11.2575	13.394	2.98389	1.7262	0.208062	1.88082	0.793472	0.206528	234	821	0.284984	0.464726	TRUE	partially_spliced
Ctrl_SERIPH1st_1	Ctrl_Conv1st	ENSG00000171517.7	LPAR3	chr1	84811600	84893540	-	81940	4601	77339	8	11.1784	3.9322	1.25159	1.59451	0.0998875	3.06083	0.609206	0.390794	31	502	0.0617407	-0.267159	TRUE	mature_mRNA_like
Ctrl_SERIPH1st_1	Ctrl_Conv1st	ENSG00000153898.14	MCOLN2	chr1	84925582	84997115	-	71533	3444	68089	15	25.6797	23.9036	3.47855	2.88297	0.118891	2.84879	0.974631	0.0253695	125	1087	0.114985	1.58469	TRUE	mature_mRNA_like
Ctrl_SERIPH1st_1	Ctrl_Conv1st	ENSG00000162643.14	DNAI3	chr1	84999146	85133138	+	133992	4039	129953	24	2.28126	2.045	0.314876	0.109601	0.116788	2.52097	0.650933	0.349067	32	168	0.190363	-0.984551	TRUE	mature_mRNA_like
Ctrl_SERIPH1st_1	Ctrl_Conv1st	ENSG00000055732.14	MCOLN3	chr1	85018081	85048679	-	30598	7589	22930	11	5.54236	7.12602	1.50065	0.787029	0.210087	1.81764	1.50146	-0.501455	45	255	0.176401	1.24817	TRUE	partially_spliced
Ctrl_SERIPH1st_1	Ctrl_Conv1st	ENSG00000097096.11	SYDE2	chr1	85156850	85201724	-	44874	7151	37723	6	12.8933	15.5733	2.86123	2.63333	0.180467	2.1335	0.736858	0.263142	34	670	0.0507387	0.0396276	TRUE	unclassified
Ctrl_SERIPH1st_1	Ctrl_Conv1st	ENSG00000162642.15	C1orf52	chr1	85249952	85259672	-	9720	3483	6237	5	35.7496	36.1402	9.75277	13.3615	0.213865	1.86336	0.303724	0.696276	175	619	0.282668	-0.708609	TRUE	partially_spliced
Ctrl_SERIPH1st_1	Ctrl_Conv1st	ENSG00000142867.15	BCL10	chr1	85265775	85276632	-	10857	4346	6511	3	20.2188	16.7108	1.68622	1.21662	0.076629	3.50783	0.320557	0.679443	91	331	0.274841	0.228265	TRUE	mature_mRNA_like
Ctrl_SERIPH1st_1	Ctrl_Conv1st	ENSG00000223653.7	BCL10-AS1	chr1	85276387	85448124	+	171737	5228	166509	6	0.115532	0	0.0434032	0	0.167622	0.587823	1.34016	-0.340156	0	26	0	-1.19509	FALSE	low_coverage
Ctrl_SERIPH1st_1	Ctrl_Conv1st	ENSG00000153904.22	DDAH1	chr1	85318480	85578363	-	259883	4587	255296	8	55.4245	59.717	0.531011	0.331074	0.00947296	6.45931	0.688408	0.311592	141	1300	0.108453	3.50827	TRUE	mature_mRNA_like
Ctrl_SERIPH1st_1	Ctrl_Conv1st	ENSG00000142871.19	CCN1	chr1	85580755	85584589	+	3834	3703	131	1	14.9511	15.4347	2.64886	2.64886	0.149653	2.45297			49	185	0.264722	-2.43292	TRUE	mature_mRNA_like
Ctrl_SERIPH1st_1	Ctrl_Conv1st	ENSG00000117174.12	ZNHIT6	chr1	85649416	85708433	-	59017	6272	52574	8	36.276	49.8116	3.48716	2.58274	0.0874783	3.34207	0.330107	0.669893	229	1376	0.166412	0.950808	TRUE	mature_mRNA_like
Ctrl_SERIPH1st_1	Ctrl_Conv1st	ENSG00000171502.15	COL24A1	chr1	85729232	86156943	-	427711	9568	417880	60	1.73579	1	0.0871399	0	0.0453163	3.29421	0.597065	0.402935	23	177	0.12987	-1.24314	TRUE	mature_mRNA_like
Ctrl_SERIPH1st_1	Ctrl_Conv1st	ENSG00000122417.17	ODF2L	chr1	86346823	86396342	-	49519	11465	37827	18	6.96206	5.48905	3.02472	2.67041	0.29987	1.17636	1.11891	-0.118909	109	651	0.167409	-0.0922375	TRUE	partially_spliced
Ctrl_SERIPH1st_1	Ctrl_Conv1st	ENSG00000137975.8	CLCA2	chr1	86424170	86456553	+	32383	4406	27977	15	0	0	0	0	0	0	0	1	0	0	0	0	FALSE	low_coverage
Ctrl_SERIPH1st_1	Ctrl_Conv1st	ENSG00000016490.17	CLCA1	chr1	86468367	86501400	+	33033	4451	28582	14	0	0	0	0	0	0	0	1	0	0	0	0	FALSE	low_coverage
Ctrl_SERIPH1st_1	Ctrl_Conv1st	ENSG00000016602.10	CLCA4	chr1	86547075	86580758	+	33683	3489	30194	13	0	0	0	0	0	0	0	1	0	0	0	0	FALSE	low_coverage
Ctrl_SERIPH1st_1	Ctrl_Conv1st	ENSG00000236915.3	CLCA4-AS1	chr1	86569023	86704484	-	135461	8476	126968	10	0.779023	0	0.0548093	0.01857	0.0586929	2.50541	0.9556	0.0443997	2	47	0.0424628	-1.99838	FALSE	low_coverage
Ctrl_SERIPH1st_1	Ctrl_Conv1st	ENSG00000291014.1	CLCA3P	chr1	86634272	86655376	+	21104	3437	17573	14	0	0	0	0	0	0	0	1	0	0	0	0	FALSE	low_coverage
Ctrl_SERIPH1st_1	Ctrl_Conv1st	ENSG00000097033.16	SH3GLB1	chr1	86704519	86748184	+	43665	7119	36546	12	54.8452	53.5376	3.18659	3.27834	0.0548166	4.06333	0.413261	0.586739	401	1693	0.236844	1.59476	TRUE	mature_mRNA_like
Ctrl_SERIPH1st_1	Ctrl_Conv1st	ENSG00000183291.18	SELENOF	chr1	86862444	86914424	-	51980	2201	49779	6	161.496	186.582	4.40318	4.26773	0.0265254	5.1653	0.346182	0.653818	386	1921	0.200927	0.780059	TRUE	mature_mRNA_like
Ctrl_SERIPH1st_1	Ctrl_Conv1st	ENSG00000153936.18	HS2ST1	chr1	86914634	87109982	+	195348	8469	186790	9	41.5546	18.0381	1.54223	1.9384	0.0357024	4.66475	0.942651	0.057349	307	2136	0.14372	1.10496	TRUE	mature_mRNA_like
Ctrl_SERIPH1st_1	Ctrl_Conv1st	ENSG00000143013.14	LMO4	chr1	87328427	87348923	+	20496	6886	13463	6	24.4657	11.8547	5.55961	6.13567	0.184549	2.11787	0.554566	0.445434	237	815	0.290762	-0.330606	TRUE	partially_spliced
Ctrl_SERIPH1st_1	Ctrl_Conv1st	ENSG00000237505.9	PKN2-AS1	chr1	87620802	88685450	-	1064648	34219	1030405	66	0.222976	0	0.0327677	0	0.0921106	1.28252	2.09181	-1.09181	0	138	0	-1.1421	FALSE	low_coverage
Ctrl_SERIPH1st_1	Ctrl_Conv1st	ENSG00000065243.21	PKN2	chr1	88684221	88836255	+	152034	6978	144632	17	79.1834	112.308	2.85599	3.08038	0.0347701	4.7453	0.500343	0.499657	1065	3228	0.329915	1.11576	TRUE	mature_mRNA_like
Ctrl_SERIPH1st_1	Ctrl_Conv1st	ENSG00000137947.13	GTF2B	chr1	88852632	88891944	-	39312	2524	36744	7	40.6466	38.9654	2.46239	1.54938	0.0569879	3.99112	0.475526	0.524474	206	648	0.317852	0.741867	TRUE	mature_mRNA_like
Ctrl_SERIPH1st_1	Ctrl_Conv1st	ENSG00000137944.18	KYAT3	chr1	88935772	88992953	-	57181	2196	54892	14	42.3912	41.8186	5.2845	1.21803	0.110611	2.98028	1.14963	-0.149626	235	1281	0.183436	-1.77168	TRUE	mature_mRNA_like
Ctrl_SERIPH1st_1	Ctrl_Conv1st	ENSG00000213516.10	RBMXL1	chr1	88979455	88992960	-	13505	5087	8418	2	32.7922	34.0601	5.1656	5.16794	0.13573	2.64308	0.07798	0.92202	53	730	0.0725928	2.34967	TRUE	mature_mRNA_like
Ctrl_SERIPH1st_1	Ctrl_Conv1st	ENSG00000117226.14	GBP3	chr1	89006665	89022894	-	16229	4394	11747	10	0	0	0	0	0	0	0	1	0	0	0	0	FALSE	low_coverage
Ctrl_SERIPH1st_1	Ctrl_Conv1st	ENSG00000117228.12	GBP1	chr1	89051504	89072769	-	21265	7276	13987	9	0.0415064	0	0	0	0	0.500867	0	1	0	1	0	0.55925	FALSE	low_coverage
Ctrl_SERIPH1st_1	Ctrl_Conv1st	ENSG00000162645.14	GBP2	chr1	89106131	89150456	-	44325	9857	34468	13	0	0	0	0	0	0	0	1	0	0	0	0	FALSE	low_coverage
Ctrl_SERIPH1st_1	Ctrl_Conv1st	ENSG00000213512.4	GBP7	chr1	89131741	89176062	-	44321	2485	41836	10	0	0	0	0	0	0	0	1	0	0	0	0	FALSE	low_coverage
Ctrl_SERIPH1st_1	Ctrl_Conv1st	ENSG00000162654.10	GBP4	chr1	89181143	89198942	-	17799	6141	11658	10	0	0	0	0	0	0	0	1	0	0	0	0	FALSE	low_coverage
Ctrl_SERIPH1st_1	Ctrl_Conv1st	ENSG00000154451.16	GBP5	chr1	89256188	89272890	-	16702	10990	5712	7	0	0	0	0	0	0	0	1	0	0	0	0	FALSE	low_coverage
Ctrl_SERIPH1st_1	Ctrl_Conv1st	ENSG00000183347.16	GBP6	chr1	89363894	89388160	+	24266	4849	19417	10	0	0	0	0	0	0	0	1	0	0	0	0	FALSE	low_coverage
Ctrl_SERIPH1st_1	Ctrl_Conv1st	ENSG00000290525.2	GBP1P1	chr1	89407578	89427272	+	19694	4155	15539	10	1.62479	0.528434	0.284253	0.0046535	0.141487	2.16629	1.28688	-0.286877	10	37	0.269542	3.4025	TRUE	mature_mRNA_like
Ctrl_SERIPH1st_1	Ctrl_Conv1st	ENSG00000197147.16	LRRC8B	chr1	89524828	89597861	+	73033	8549	64484	10	21.4515	6.98969	2.31065	1.73141	0.0968332	3.16029	0.789627	0.210373	58	1113	0.0521067	1.34094	TRUE	mature_mRNA_like
Ctrl_SERIPH1st_1	Ctrl_Conv1st	ENSG00000231999.9	LRRC8C-DT	chr1	89581290	89633008	-	51718	12737	38981	7	0.946534	0	0.100895	0.076186	0.0879316	2.3811	0.663406	0.336594	1	54	0.0184843	-2.78651	TRUE	unclassified
Ctrl_SERIPH1st_1	Ctrl_Conv1st	ENSG00000171488.16	LRRC8C	chr1	89632706	89769903	+	137197	11803	125394	8	15.9304	0.840223	1.19918	0.725343	0.0696002	3.62513	0.729141	0.270859	94	1133	0.0829583	-3.19604	TRUE	mature_mRNA_like
Ctrl_SERIPH1st_1	Ctrl_Conv1st	ENSG00000272931.1	LRRC8D-DT	chr1	89820173	89820868	-	695	695			2.60575	2.60575							0	6	0	-0.972998	TRUE	unclassified
Ctrl_SERIPH1st_1	Ctrl_Conv1st	ENSG00000171492.15	LRRC8D	chr1	89820977	89936611	+	115634	6681	108866	12	23.2821	3.07838	3.46483	2.89419	0.129058	2.7135	0.566033	0.433967	31	1781	0.017405	0.173694	TRUE	mature_mRNA_like
Ctrl_SERIPH1st_1	Ctrl_Conv1st	ENSG00000162664.18	ZNF326	chr1	89995109	90035533	+	40424	11057	29231	10	30.0841	44.7252	4.78759	5.47002	0.136899	2.62659	0.40777	0.59223	312	1577	0.197831	0.912544	TRUE	mature_mRNA_like
Ctrl_SERIPH1st_1	Ctrl_Conv1st	ENSG00000143032.8	BARHL2	chr1	90711538	90717302	-	5764	2044	3720	2	1.90264	2.23894	0.224194	0.225861	0.100678	2.62698	0.20688	0.79312	2	17	0.116959	-1.00001	TRUE	mature_mRNA_like
Ctrl_SERIPH1st_1	Ctrl_Conv1st	ENSG00000122482.23	ZNF644	chr1	90915297	91022376	-	107079	8723	98356	7	46.3719	38.4845	3.84265	3.80816	0.0763726	3.55912	0.469402	0.530598	142	2616	0.0542793	1.29653	TRUE	mature_mRNA_like
Ctrl_SERIPH1st_1	Ctrl_Conv1st	ENSG00000162669.16	HFM1	chr1	91260765	91404856	-	144091	5814	137869	35	2.57585	1.87314	0.48158	0.222157	0.152523	2.20195	0.983332	0.0166683	30	273	0.10985	-1.106	TRUE	partially_spliced
Ctrl_SERIPH1st_1	Ctrl_Conv1st	ENSG00000097046.14	CDC7	chr1	91500534	91527360	+	26826	5841	20895	9	62.609	132.94	6.40593	4.30106	0.0926853	3.26884	0.646445	0.353555	691	1669	0.413996	0.227396	TRUE	mature_mRNA_like
Ctrl_SERIPH1st_1	Ctrl_Conv1st	ENSG00000069702.12	TGFBR3	chr1	91680342	91906335	-	225993	8911	217082	27	23.0694	21.1146	1.08961	1.29893	0.0449156	4.28366	0.497028	0.502972	292	1477	0.197685	1.73054	TRUE	mature_mRNA_like
Ctrl_SERIPH1st_1	Ctrl_Conv1st	ENSG00000137948.19	BRDT	chr1	91949342	92014426	+	65084	4635	60287	22	0	0	0	0	0	0	0	1	0	0	0	0	FALSE	low_coverage
Ctrl_SERIPH1st_1	Ctrl_Conv1st	ENSG00000172031.8	EPHX4	chr1	92029474	92063538	+	34064	2760	31304	6	5.95145	10.1812	0.346346	0.141107	0.0541351	3.76105	0.862679	0.137321	31	91	0.340285	-0.73344	TRUE	mature_mRNA_like
Ctrl_SERIPH1st_1	Ctrl_Conv1st	ENSG00000230667.7	SETSIP	chr1	92074532	92075411	-	879	879			0	0							0	0	0	0	FALSE	low_coverage
Ctrl_SERIPH1st_1	Ctrl_Conv1st	ENSG00000189195.16	BTBD8	chr1	92080304	92184725	+	104421	8342	96079	18	2.11688	2.4467	0.430396	0.203367	0.162581	2.06339	0.874772	0.125228	20	198	0.100959	0.0178002	TRUE	partially_spliced
Ctrl_SERIPH1st_1	Ctrl_Conv1st	ENSG00000203910.9	C1orf146	chr1	92217914	92245813	+	27899	1086	26813	6	0	0	0	0	0	0	0	1	0	0	0	0	FALSE	low_coverage
Ctrl_SERIPH1st_1	Ctrl_Conv1st	ENSG00000174842.18	GLMN	chr1	92245787	92299009	-	53222	4087	49088	18	17.3731	30.0669	5.28638	1.84719	0.232271	1.69775	0.879371	0.120629	168	1107	0.151748	-0.205154	TRUE	partially_spliced
Ctrl_SERIPH1st_1	Ctrl_Conv1st	ENSG00000122484.10	RPAP2	chr1	92299027	92402056	+	103029	17223	85806	14	14.4414	35.5	3.60947	2.26544	0.198859	1.97089	0.615045	0.384955	189	1872	0.100956	0.144282	TRUE	partially_spliced
Ctrl_SERIPH1st_1	Ctrl_Conv1st	ENSG00000162676.14	GFI1	chr1	92472359	92486925	-	14566	6487	8005	8	4.97734	4.51019	1.41012	0.946346	0.217361	1.74941	0.84742	0.15258	15	146	0.102669	1.26619	TRUE	partially_spliced
Ctrl_SERIPH1st_1	Ctrl_Conv1st	ENSG00000067208.18	EVI5	chr1	92508695	92792416	-	283721	14892	268791	32	12.5836	15.7948	1.42236	1.23812	0.100834	3.05859	0.523189	0.476811	205	1907	0.107493	0.448198	TRUE	mature_mRNA_like
Ctrl_SERIPH1st_1	Ctrl_Conv1st	ENSG00000122406.15	RPL5	chr1	92831989	92841924	+	9935	3710	6201	7	768.733	330	34.2053	32.9862	0.0425948	4.48617	0.478636	0.521364	7875	10245	0.76866	-2.80166	TRUE	mature_mRNA_like
Ctrl_SERIPH1st_1	Ctrl_Conv1st	ENSG00000154511.13	DIPK1A	chr1	92832736	92961522	-	128786	4206	124580	6	13.3405	14.6667	1.04143	0.49623	0.0719124	3.55767	0.618463	0.381537	60	621	0.0966028	-0.11864	TRUE	mature_mRNA_like
Ctrl_SERIPH1st_1	Ctrl_Conv1st	ENSG00000143033.19	MTF2	chr1	93079234	93139079	+	59845	5964	53881	16	44.4831	49.9811	3.88038	3.23614	0.0800683	3.48552	1.24841	-0.248406	442	1587	0.278495	1.3134	TRUE	mature_mRNA_like
Ctrl_SERIPH1st_1	Ctrl_Conv1st	ENSG00000117500.14	TMED5	chr1	93149741	93180516	-	30775	9388	21387	6	50.0941	19.6149	4.93823	4.01267	0.0895706	3.31653	0.868532	0.131468	462	1924	0.240112	1.65182	TRUE	mature_mRNA_like
Ctrl_SERIPH1st_1	Ctrl_Conv1st	ENSG00000122483.19	CCDC18	chr1	93179894	93279048	+	99154	7955	91199	31	10.1209	9.12524	2.39392	2.02508	0.18977	2.03504	0.621425	0.378575	137	1004	0.136441	-0.618295	TRUE	partially_spliced
Ctrl_SERIPH1st_1	Ctrl_Conv1st	ENSG00000223745.9	CCDC18-AS1	chr1	93262185	93346025	-	83840	7017	76743	17	3.60382	1.07273	0.777452	0.646776	0.173489	2.07762	0.896495	0.103505	18	285	0.0631357	-1.93218	TRUE	unclassified
Ctrl_SERIPH1st_1	Ctrl_Conv1st	ENSG00000117505.14	DR1	chr1	93345906	93369493	+	23587	10925	12662	3	50.8825	134.317	5.76473	3.96791	0.101586	3.11986	0.472276	0.527724	290	2100	0.138089	-1.29392	TRUE	mature_mRNA_like
Ctrl_SERIPH1st_1	Ctrl_Conv1st	ENSG00000137942.19	FNBP1L	chr1	93448054	93554661	+	106607	6020	100587	16	26.7289	23.8775	2.44342	1.97113	0.0834719	3.39895	0.74825	0.25175	193	1364	0.141485	0.961311	TRUE	mature_mRNA_like
Ctrl_SERIPH1st_1	Ctrl_Conv1st	ENSG00000137936.19	BCAR3	chr1	93561740	93847488	-	285748	8530	277218	28	5.14127	3.93814	0.744764	0.280103	0.124417	2.6333	1.27388	-0.273879	62	837	0.0740652	-0.471704	TRUE	mature_mRNA_like
Ctrl_SERIPH1st_1	Ctrl_Conv1st	ENSG00000224093.8	BCAR3-AS1	chr1	93591963	93610605	+	18642	4855	13787	7	0.35654	0.078298	0.377892	0.219636	0.452874	-0.0659455	0.8147	0.1853	1	23	0.04329	0.8948	FALSE	low_coverage
Ctrl_SERIPH1st_1	Ctrl_Conv1st	ENSG00000067334.14	DNTTIP2	chr1	93866283	93879918	-	13635	7518	6117	6	23.7292	24.1474	5.71032	3.44785	0.193311	2.03604	0.622843	0.377157	96	713	0.134623	-3.09464	TRUE	partially_spliced
Ctrl_SERIPH1st_1	Ctrl_Conv1st	ENSG00000023909.11	GCLM	chr1	93885198	93909513	-	24315	5561	18754	8	25.5183	27.1471	2.07822	2.06265	0.0750357	3.55595	0.638065	0.361935	141	606	0.232635	1.10096	TRUE	mature_mRNA_like
Ctrl_SERIPH1st_1	Ctrl_Conv1st	ENSG00000198691.14	ABCA4	chr1	93992833	94121148	-	128315	8547	119695	52	0.106002	0	0.00252309	0	0.0120997	1.00671	0.149027	0.850973	3	4	0.731707	0.304928	FALSE	low_coverage
Ctrl_SERIPH1st_1	Ctrl_Conv1st	ENSG00000137962.14	ARHGAP29	chr1	94148987	94275068	-	126081	18608	107377	24	8.98388	15.3196	0.677277	0.649866	0.0693849	3.54681	0.914149	0.0858509	184	800	0.229971	3.95366	TRUE	mature_mRNA_like
Ctrl_SERIPH1st_1	Ctrl_Conv1st	ENSG00000226835.5	ARHGAP29-AS1	chr1	94246950	94411036	+	164086	5771	158289	19	0	0	0.00381581	0	0.0367556	-0.0540262	0.128634	0.871366	0	2	0	0	FALSE	low_coverage
Ctrl_SERIPH1st_1	Ctrl_Conv1st	ENSG00000117528.15	ABCD3	chr1	94418241	94518666	+	100425	7943	92218	24	37.9223	66.6095	2.51374	1.70932	0.0620124	3.86266	0.755353	0.244647	697	1780	0.391551	0.638638	TRUE	mature_mRNA_like
Ctrl_SERIPH1st_1	Ctrl_Conv1st	ENSG00000117525.15	F3	chr1	94529172	94541851	-	12679	2996	9683	6	1.91288	2.3746	0.368687	0.235213	0.154808	2.10257	0.904265	0.0957352	12	31	0.385852	0.00863048	TRUE	partially_spliced
Ctrl_SERIPH1st_1	Ctrl_Conv1st	ENSG00000293271.2	SLC44A3-AS1	chr1	94585555	94855426	-	269871	12880	256991	24	0.446273	0.17434	0.227272	0.0899535	0.293806	0.73913	0.747363	0.252637	8	215	0.037192	-1.04966	FALSE	low_coverage
Ctrl_SERIPH1st_1	Ctrl_Conv1st	ENSG00000143036.18	SLC44A3	chr1	94820277	94895246	+	74969	3056	71913	19	1.82853	1.26357	0.128864	0	0.0626346	3.07494	0.482138	0.517862	17	50	0.339321	-0.413505	TRUE	mature_mRNA_like
Ctrl_SERIPH1st_1	Ctrl_Conv1st	ENSG00000117519.17	CNN3	chr1	94896948	94927696	-	30748	2838	27829	8	174.07	174.926	4.52959	4.56211	0.0253476	5.23347	0.614842	0.385158	887	2072	0.428068	1.27794	TRUE	mature_mRNA_like
Ctrl_SERIPH1st_1	Ctrl_Conv1st	ENSG00000235501.10	CNN3-DT	chr1	94926380	95067545	+	141165	5920	135198	12	2.96537	0.08526	0.145653	0.106848	0.0453604	3.64137	1.29651	-0.296508	4	124	0.0322321	-3.20553	TRUE	mature_mRNA_like
Ctrl_SERIPH1st_1	Ctrl_Conv1st	ENSG00000172339.11	ALG14	chr1	94974404	95072951	-	98547	9641	88906	6	9.93901	15.3083	1.56799	1.30197	0.13509	2.58943	0.452763	0.547237	153	787	0.194384	-0.35651	TRUE	mature_mRNA_like
Ctrl_SERIPH1st_1	Ctrl_Conv1st	ENSG00000152078.11	TLCD4	chr1	95117291	95197607	+	80316	10772	69544	8	3.63572	4.84615	0.588145	0.430299	0.136023	2.4406	0.933087	0.0669133	25	270	0.0925583	0.581202	TRUE	mature_mRNA_like
Ctrl_SERIPH1st_1	Ctrl_Conv1st	ENSG00000226026.8	RWDD3-DT	chr1	95161675	95234108	-	72433	5485	66948	5	0.0517776	0	0.00846929	0	0.0528515	0.484672	0.181848	0.818152	1	3	0.322581	-0.476769	FALSE	low_coverage
Ctrl_SERIPH1st_1	Ctrl_Conv1st	ENSG00000122481.18	RWDD3	chr1	95234188	95247685	+	13497	2525	10874	4	19.4091	14.9146	4.238	4.08387	0.178464	2.16905	0.385043	0.614957	37	322	0.114871	1.061	TRUE	partially_spliced
Ctrl_SERIPH1st_1	Ctrl_Conv1st	ENSG00000117569.21	PTBP2	chr1	96721572	96823738	+	102166	20214	81866	12	10.242	17.565	5.54636	4.96703	0.349083	0.873125	0.644983	0.355017	297	2213	0.134201	1.01815	TRUE	partially_spliced
Ctrl_SERIPH1st_1	Ctrl_Conv1st	ENSG00000188641.15	DPYD	chr1	97077742	97995000	-	917258	7601	909657	33	6.77424	5.17922	0.313358	0.283573	0.043597	4.05574	0.538714	0.461286	118	1124	0.104973	-0.173427	TRUE	mature_mRNA_like
Ctrl_SERIPH1st_1	Ctrl_Conv1st	ENSG00000232878.3	DPYD-AS1	chr1	97095922	97322955	+	227033	1479	225554	6	0	0	0.00115275	0	0.0113961	-0.0165355	0.0617964	0.938204	0	1	0	0.0540473	FALSE	low_coverage
Ctrl_SERIPH1st_1	Ctrl_Conv1st	ENSG00000232542.1	DPYD-IT1	chr1	97394153	97420141	-	25988	401	25587	1	1.32668	1	0.326494	0.326494	0.18623	1.74207			0	30	0	-1.18037	TRUE	unclassified
Ctrl_SERIPH1st_1	Ctrl_Conv1st	ENSG00000235777.1	DPYD-AS2	chr1	97796920	97798066	+	1146	974	172	1	0	0	0	0	0	0			0	0	0	0	FALSE	low_coverage
Ctrl_SERIPH1st_1	Ctrl_Conv1st	ENSG00000225206.13	MIR137HG	chr1	97933473	98054717	-	121244	13528	107648	13	0	0	0	0	0	0	0	1	0	0	0	0	FALSE	low_coverage
Ctrl_SERIPH1st_1	Ctrl_Conv1st	ENSG00000162627.18	SNX7	chr1	98661671	98760504	+	98833	2130	96703	11	39.069	33.0315	1.10014	0.862952	0.0273197	5.02844	0.759439	0.240561	180	633	0.284315	-0.488985	TRUE	mature_mRNA_like
Ctrl_SERIPH1st_1	Ctrl_Conv1st	ENSG00000117598.15	PLPPR5	chr1	98890244	99227929	-	337685	4859	332826	9	0.248611	0.176587	0.00181473	0	0.00517864	1.77567	0.054568	0.945432	1	6	0.163934	0.20045	FALSE	low_coverage
Ctrl_SERIPH1st_1	Ctrl_Conv1st	ENSG00000232825.4	PLPPR5-AS1	chr1	99004275	99244794	+	240519	7333	233186	8	0	0	0.00259021	0	0.0252481	-0.0368931	0.421868	0.578132	0	2	0	-0.115979	FALSE	low_coverage
Ctrl_SERIPH1st_1	Ctrl_Conv1st	ENSG00000117600.15	PLPPR4	chr1	99264291	99309590	+	45299	5201	40098	6	0.436839	0	0.00359113	0	0.00664495	2.37359	0.022804	0.977196	2	8	0.246914	1.22239	FALSE	low_coverage
Ctrl_SERIPH1st_1	Ctrl_Conv1st	ENSG00000099260.13	PALMD	chr1	99645498	99695178	+	49680	9325	40355	7	0.276354	0.427858	0.02592	0	0.0644336	1.57958	0.400551	0.599449	3	12	0.247934	0.219384	FALSE	low_coverage
Ctrl_SERIPH1st_1	Ctrl_Conv1st	ENSG00000156869.15	FRRS1	chr1	99703969	99766635	-	62666	8624	53965	17	5.59624	7.7193	0.860372	0.636364	0.131222	2.56834	1.05311	-0.0531144	86	318	0.270355	1.22096	TRUE	mature_mRNA_like
Ctrl_SERIPH1st_1	Ctrl_Conv1st	ENSG00000162688.18	AGL	chr1	99849776	99924024	+	74248	8895	65166	31	43.8804	65.7412	0.79144	0.495895	0.0176772	5.62458	0.929063	0.070937	959	1472	0.65145	-0.42271	TRUE	mature_mRNA_like
Ctrl_SERIPH1st_1	Ctrl_Conv1st	ENSG00000117620.16	SLC35A3	chr1	99969350	100035634	+	66284	18815	47430	12	8.93016	8.4834	2.50668	1.96927	0.217276	1.79254	0.853332	0.146668	190	961	0.19769	1.59569	TRUE	partially_spliced
Ctrl_SERIPH1st_1	Ctrl_Conv1st	ENSG00000156875.15	MFSD14A	chr1	100038075	100083945	+	45870	3568	42302	12	68.1973	93.7551	3.62347	2.46199	0.0503814	4.19711	0.571962	0.428038	483	1332	0.362585	1.01583	TRUE	mature_mRNA_like
Ctrl_SERIPH1st_1	Ctrl_Conv1st	ENSG00000241073.1	MFSD14A-AS1	chr1	100057989	100084471	-	26482	384	26098	1	7.17969	4.72089	0.647827	0.647827	0.0817188	3.2831			0	71	0	-4.48082	TRUE	mature_mRNA_like
Ctrl_SERIPH1st_1	Ctrl_Conv1st	ENSG00000156876.10	SASS6	chr1	100083562	100132955	-	49393	3972	45347	14	38.1893	50.9715	3.90824	1.99283	0.0926177	3.2559	0.816573	0.183427	350	1102	0.317576	0.162308	TRUE	mature_mRNA_like
Ctrl_SERIPH1st_1	Ctrl_Conv1st	ENSG00000122435.12	TRMT13	chr1	100133044	100150496	+	17452	4237	13125	8	20.4709	29.4906	10.1068	7.03745	0.329452	1.01107	0.645039	0.354961	76	733	0.103669	1.32645	TRUE	partially_spliced
Ctrl_SERIPH1st_1	Ctrl_Conv1st	ENSG00000122477.15	LRRC39	chr1	100148423	100178267	-	29844	4107	25737	11	1.0935	1.23752	0.357462	0.268258	0.230478	1.38347	0.924174	0.0758255	8	46	0.173536	-1.42936	TRUE	partially_spliced
Ctrl_SERIPH1st_1	Ctrl_Conv1st	ENSG00000137992.16	DBT	chr1	100182221	100249873	-	67652	12561	55091	13	13.3734	26.6285	2.12748	2.00673	0.136369	2.59663	0.662022	0.337978	126	954	0.132062	1.35136	TRUE	mature_mRNA_like
Ctrl_SERIPH1st_1	Ctrl_Conv1st	ENSG00000224616.5	RTCA-AS1	chr1	100251527	100266182	-	14655	10037	4532	1	2.58175	1.22905	0.276699	0.276699	0.0935285	2.83169			1	91	0.0109769	-4.04869	TRUE	mature_mRNA_like
Ctrl_SERIPH1st_1	Ctrl_Conv1st	ENSG00000137996.14	RTCA	chr1	100266159	100292769	+	26610	3111	23499	13	63.7181	78.3986	4.95502	5.67141	0.0720488	3.65818	0.624475	0.375525	468	1056	0.44314	-0.0678415	TRUE	mature_mRNA_like
Ctrl_SERIPH1st_1	Ctrl_Conv1st	ENSG00000079335.22	CDC14A	chr1	100325628	100520277	+	194649	6747	187902	23	11.632	10.7077	1.2178	0.987989	0.0940405	3.15424	0.606199	0.393801	143	1026	0.139363	1.56752	TRUE	mature_mRNA_like
Ctrl_SERIPH1st_1	Ctrl_Conv1st	ENSG00000181656.7	GPR88	chr1	100538138	100542021	+	3883	3492	391	1	0	0	0	0	0	0			0	0	0	0	FALSE	low_coverage
Ctrl_SERIPH1st_1	Ctrl_Conv1st	ENSG00000162692.13	VCAM1	chr1	100719683	100739045	+	19362	6107	13255	8	0	0	0	0	0	0	0	1	0	0	0	0	FALSE	low_coverage
Ctrl_SERIPH1st_1	Ctrl_Conv1st	ENSG00000162694.15	EXTL2	chr1	100872371	100896000	-	23629	4735	18894	8	16.9128	7.31608	5.04192	3.49555	0.22861	1.72624	0.551206	0.448794	23	584	0.0393768	0.960436	TRUE	unclassified
Ctrl_SERIPH1st_1	Ctrl_Conv1st	ENSG00000162695.14	SLC30A7	chr1	100896060	100996260	+	100200	9285	90915	13	30.7779	49.5845	2.85045	2.50328	0.084512	3.38757	0.909498	0.0905024	235	1821	0.129043	0.390337	TRUE	mature_mRNA_like
Ctrl_SERIPH1st_1	Ctrl_Conv1st	ENSG00000117543.23	DPH5	chr1	100989622	101026110	-	36488	6299	30189	8	19.9203	28.2951	4.72781	5.03422	0.191037	2.05202	0.348565	0.651435	174	896	0.194175	-0.0984153	TRUE	partially_spliced
Ctrl_SERIPH1st_1	Ctrl_Conv1st	ENSG00000233184.10	DPH5-DT	chr1	101025824	101090513	+	64689	9959	54730	8	3.16227	3	2.81622	1.21282	0.46331	0.161772	0.758618	0.241382	26	622	0.0417939	-1.96456	TRUE	unclassified
Ctrl_SERIPH1st_1	Ctrl_Conv1st	ENSG00000225938.4	S1PR1-DT	chr1	101228768	101236815	-	8047	2982	5065	1	0.144199	0.728814	0.034353	0.034353	0.123327	0.862026			0	2	0	1.80906	FALSE	low_coverage
Ctrl_SERIPH1st_1	Ctrl_Conv1st	ENSG00000170989.11	S1PR1	chr1	101235365	101243713	+	8348	5458	2811	6	3.15317	0.266014	0.290644	0.117902	0.0820144	3.05792	1.00978	-0.00978032	4	60	0.0665557	-0.370181	TRUE	mature_mRNA_like
Ctrl_SERIPH1st_1	Ctrl_Conv1st	ENSG00000118733.18	OLFM3	chr1	101802559	101997020	-	194461	4550	189911	10	0	0	0	0	0	0	0	1	0	0	0	0	FALSE	low_coverage
Ctrl_SERIPH1st_1	Ctrl_Conv1st	ENSG00000060718.23	COL11A1	chr1	102876466	103108872	-	232406	9091	223085	68	0	0	0	0	0	0	0	1	0	0	0	0	FALSE	low_coverage
Ctrl_SERIPH1st_1	Ctrl_Conv1st	ENSG00000224613.8	RNPC3-DT	chr1	103400535	103525924	-	125389	4740	120649	11	0.021308	0	0.234532	0	0.659093	-1.46347	1.21608	-0.216079	0	95	0	-2.87682	FALSE	low_coverage
Ctrl_SERIPH1st_1	Ctrl_Conv1st	ENSG00000185946.17	RNPC3	chr1	103525674	103555239	+	29565	7378	22187	11	13.1675	46.4385	3.44869	2.89847	0.206308	1.90254	0.544026	0.455974	169	580	0.291329	-0.358098	TRUE	partially_spliced
Ctrl_SERIPH1st_1	Ctrl_Conv1st	ENSG00000240038.8	AMY2B	chr1	103553814	103579534	+	25720	7491	18134	10	2.44373	0.689846	0.605382	0	0.192239	1.85047	0.991532	0.00846803	11	106	0.103676	-3.37564	TRUE	partially_spliced
Ctrl_SERIPH1st_1	Ctrl_Conv1st	ENSG00000243480.8	AMY2A	chr1	103617426	103625780	+	8354	1599	6661	8	0	0	0	0	0	0	0	1	0	0	0	0	FALSE	low_coverage
Ctrl_SERIPH1st_1	Ctrl_Conv1st	ENSG00000237763.11	AMY1A	chr1	103650591	103664629	+	14038	3071	10615	11	0	0	0	0	0	0	0	1	0	0	0	0	FALSE	low_coverage
Ctrl_SERIPH1st_1	Ctrl_Conv1st	ENSG00000174876.18	AMY1B	chr1	103687414	103701064	-	13650	2426	10887	10	0	0	0	0	0	0	0	1	0	0	0	0	FALSE	low_coverage
Ctrl_SERIPH1st_1	Ctrl_Conv1st	ENSG00000187733.8	AMY1C	chr1	103745125	103758726	+	13601	2329	11037	10	0	0	0	0	0	0	0	1	0	0	0	0	FALSE	low_coverage
Ctrl_SERIPH1st_1	Ctrl_Conv1st	ENSG00000293061.2	THAP3P1	chr1	104056760	104226678	+	169918	3654	166264	7	0	0	0	0	0	0	0	1	0	0	0	0	FALSE	low_coverage
Ctrl_SERIPH1st_1	Ctrl_Conv1st	ENSG00000198890.9	PRMT6	chr1	107056673	107067636	+	10963	4340	6623	2	57.1002	3.00458	0.495697	0.534113	0.00859154	6.5853	0.0832959	0.916704	1	837	0.0011946	-9.55467	TRUE	mature_mRNA_like
Ctrl_SERIPH1st_1	Ctrl_Conv1st	ENSG00000162631.21	NTNG1	chr1	107140006	107484923	+	344917	10496	334421	16	0	0	0.000903	0	0.00894919	-0.0129691	0.011921	0.988079	0	1	0	0	FALSE	low_coverage
Ctrl_SERIPH1st_1	Ctrl_Conv1st	ENSG00000134215.17	VAV3	chr1	107571160	107965180	-	394020	7360	386660	39	1.74755	0.161708	0.111788	0.03714	0.057054	3.12492	0.765782	0.234218	15	188	0.0797448	0.110506	TRUE	mature_mRNA_like
Ctrl_SERIPH1st_1	Ctrl_Conv1st	ENSG00000230489.3	VAV3-AS1	chr1	107964366	108076020	+	111654	5540	106114	12	0	0	0.00250672	0	0.0244542	-0.0357185	0.0935028	0.906497	0	1	0	0.110239	FALSE	low_coverage
Ctrl_SERIPH1st_1	Ctrl_Conv1st	ENSG00000085491.18	SLC25A24	chr1	108134042	108200849	-	66807	6726	60081	11	25.7817	58.0589	1.64148	1.29609	0.05964	3.89355	0.510147	0.489853	330	910	0.362598	0.712811	TRUE	mature_mRNA_like
Ctrl_SERIPH1st_1	Ctrl_Conv1st	ENSG00000196427.14	NBPF4	chr1	108222463	108244081	-	21618	3463	18155	15	0	0	0	0	0	0	0	1	0	0	0	0	FALSE	low_coverage
Ctrl_SERIPH1st_1	Ctrl_Conv1st	ENSG00000186086.19	NBPF6	chr1	108450281	108471920	+	21639	3504	18135	15	0	0	0	0	0	0	0	1	0	0	0	0	FALSE	low_coverage
Ctrl_SERIPH1st_1	Ctrl_Conv1st	ENSG00000162636.17	EEIG2	chr1	108560035	108644900	+	84865	9432	75365	8	12.4427	9.29455	1.10477	1.06049	0.0809503	3.38002	0.496561	0.503439	86	670	0.128339	1.76042	TRUE	mature_mRNA_like
Ctrl_SERIPH1st_1	Ctrl_Conv1st	ENSG00000162639.17	HENMT1	chr1	108648284	108661526	-	13242	3434	9808	7	0	0	0	0	0	0	0	1	0	0	0	0	FALSE	low_coverage
Ctrl_SERIPH1st_1	Ctrl_Conv1st	ENSG00000134186.13	PRPF38B	chr1	108692309	108702928	+	10619	6955	3582	5	41.0282	56.8113	12.9489	12.5915	0.239453	1.6562	0.567285	0.432715	170	1110	0.153139	0.401065	TRUE	partially_spliced
Ctrl_SERIPH1st_1	Ctrl_Conv1st	ENSG00000143107.11	FNDC7	chr1	108712906	108746052	+	33146	6394	26669	11	0.0944637	0	0	0	0	0.959501	0	1	0	2	0	0.684675	FALSE	low_coverage
Ctrl_SERIPH1st_1	Ctrl_Conv1st	ENSG00000116266.12	STXBP3	chr1	108746633	108809525	+	62892	6164	56728	19	18.2127	31.8423	2.11716	1.38742	0.103631	3.04606	0.849361	0.150639	291	778	0.373988	0.168782	TRUE	mature_mRNA_like
Ctrl_SERIPH1st_1	Ctrl_Conv1st	ENSG00000162641.20	AKNAD1	chr1	108815897	108963484	-	147587	5039	142363	15	0.640206	0	3.05714	0	0.805073	-2.09262	2.73752	-1.73752	394	1466	0.26874	-6.6134	TRUE	unclassified
Ctrl_SERIPH1st_1	Ctrl_Conv1st	ENSG00000203897.5	SPATA42	chr1	108857159	108858529	+	1370	914	456	2	0	0	0	0	0	0	0	1	0	0	0	0	FALSE	low_coverage
Ctrl_SERIPH1st_1	Ctrl_Conv1st	ENSG00000121957.16	GPSM2	chr1	108875349	108934545	+	59196	22015	37154	18	6.89871	14.7437	0.937476	0.546854	0.118127	2.75401	1.09832	-0.0983196	236	626	0.376937	0.261481	TRUE	mature_mRNA_like
Ctrl_SERIPH1st_1	Ctrl_Conv1st	ENSG00000121940.18	CLCC1	chr1	108881884	108963527	-	81643	20143	61449	16	17.2256	11.8636	1.47485	2.68673	0.0784474	3.45962	0.677785	0.322215	394	1464	0.269107	-6.25001	TRUE	mature_mRNA_like
Ctrl_SERIPH1st_1	Ctrl_Conv1st	ENSG00000085433.18	WDR47	chr1	108970210	109042169	-	71959	4805	67154	18	16.0722	14.5799	1.08548	1.1788	0.0628981	3.76998	0.701214	0.298786	129	503	0.25641	0.896755	TRUE	mature_mRNA_like
Ctrl_SERIPH1st_1	Ctrl_Conv1st	ENSG00000197780.11	TAF13	chr1	109062495	109076012	-	13517	2764	10753	4	17.5984	17.3517	1.76686	1.49238	0.0907697	3.24494	0.680771	0.319229	20	226	0.0884564	1.8894	TRUE	mature_mRNA_like
Ctrl_SERIPH1st_1	Ctrl_Conv1st	ENSG00000273382.1	TMEM167B-DT	chr1	109087970	109090858	-	2888	2888			5.61808	5.61808							0	57	0	-0.0866889	TRUE	unclassified
Ctrl_SERIPH1st_1	Ctrl_Conv1st	ENSG00000215717.8	TMEM167B	chr1	109090366	109096935	+	6569	4011	2558	3	17.0863	8.90595	2.28421	1.15	0.117316	2.84967	0.785002	0.214998	53	248	0.213624	1.85037	TRUE	mature_mRNA_like
Ctrl_SERIPH1st_1	Ctrl_Conv1st	ENSG00000179902.14	CFAP276	chr1	109105950	109113857	-	7907	1265	6642	4	0	0	0	0	0	0	0	1	0	0	0	0	FALSE	low_coverage
Ctrl_SERIPH1st_1	Ctrl_Conv1st	ENSG00000116299.18	ELAPOR1	chr1	109113174	109206781	+	93607	9702	83827	22	0.124407	0	0.0537655	0	0.193281	0.545388	0.190359	0.809641	4	19	0.209424	-1.23437	FALSE	low_coverage
Ctrl_SERIPH1st_1	Ctrl_Conv1st	ENSG00000031698.14	SARS1	chr1	109213843	109238773	+	24930	4759	20171	12	86.8201	84.2526	5.31144	3.72644	0.0575881	4.00561	0.781673	0.218327	961	1739	0.552585	1.13531	TRUE	mature_mRNA_like
Ctrl_SERIPH1st_1	Ctrl_Conv1st	ENSG00000143126.8	CELSR2	chr1	109249538	109275751	+	26213	12830	13295	24	34.0328	30.8628	1.31418	0.630228	0.0370745	4.59312	1.14904	-0.149044	518	1513	0.342344	0.238533	TRUE	mature_mRNA_like
Ctrl_SERIPH1st_1	Ctrl_Conv1st	ENSG00000134222.17	PSRC1	chr1	109279544	109284107	-	4563	3770	671	3	28.6504	26.4434	1.98361	1.38929	0.0645411	3.78643	0.820962	0.179038	200	366	0.546299	2.59716	TRUE	mature_mRNA_like
Ctrl_SERIPH1st_1	Ctrl_Conv1st	ENSG00000221986.8	MYBPHL	chr1	109292362	109307213	-	14851	3343	11508	7	0.0149566	0	0.157456	0	0.578006	-1.16324	0.567269	0.432731	0	7	0	-1.9348	FALSE	low_coverage
Ctrl_SERIPH1st_1	Ctrl_Conv1st	ENSG00000134243.13	SORT1	chr1	109309567	109397967	-	88400	9365	78916	24	66.5879	77.8333	1.859	1.19682	0.0271201	5.08923	0.753861	0.246139	751	2569	0.29232	2.66846	TRUE	mature_mRNA_like
Ctrl_SERIPH1st_1	Ctrl_Conv1st	ENSG00000143106.14	PSMA5	chr1	109399041	109426471	-	27430	5901	21512	9	51.4376	194.029	6.7705	4.57069	0.116116	2.90714	0.537154	0.462846	935	1501	0.622877	-0.663564	TRUE	mature_mRNA_like
Ctrl_SERIPH1st_1	Ctrl_Conv1st	ENSG00000143028.10	SYPL2	chr1	109466541	109482134	+	15593	4130	11386	4	14.9734	13.719	2.86316	1.58479	0.159628	2.34679	1.10225	-0.10225	35	317	0.110375	2.38713	TRUE	partially_spliced
Ctrl_SERIPH1st_1	Ctrl_Conv1st	ENSG00000162650.18	ATXN7L2	chr1	109483478	109492812	+	9334	5430	3877	9	15.3586	17.2418	6.06603	4.292	0.281819	1.32599	0.957883	0.0421174	118	357	0.33044	0.652053	TRUE	partially_spliced
Ctrl_SERIPH1st_1	Ctrl_Conv1st	ENSG00000174151.16	CYB561D1	chr1	109494051	109502932	+	8881	5722	3159	4	8.46295	9.30596	1.68218	1.68892	0.164193	2.26447	0.808049	0.191951	7	179	0.0390843	-2.14354	TRUE	unclassified
Ctrl_SERIPH1st_1	Ctrl_Conv1st	ENSG00000181754.8	AMIGO1	chr1	109504177	109509738	-	5561	5141	420	1	2.2943	2.24763	2.01905	2.01905	0.457487	0.176188			4	43	0.0928074	-1.63737	TRUE	unclassified
Ctrl_SERIPH1st_1	Ctrl_Conv1st	ENSG00000156097.13	GPR61	chr1	109539871	109548406	+	8535	5057	3478	2	0.0597196	0	0.260495	0.403025	0.619909	-1.17444	0.801203	0.198797	0	4	0	2.51533	FALSE	low_coverage
Ctrl_SERIPH1st_1	Ctrl_Conv1st	ENSG00000065135.13	GNAI3	chr1	109548583	109600195	+	51612	9170	42442	7	42.0603	180.112	1.8862	1.63793	0.0428229	4.4078	0.355347	0.644653	619	1553	0.398558	1.61053	TRUE	mature_mRNA_like
Ctrl_SERIPH1st_1	Ctrl_Conv1st	ENSG00000134183.14	GNAT2	chr1	109601406	109619929	-	18523	3193	15330	10	1.14344	1.15504	0.211089	0.0485475	0.145126	1.99894	0.625979	0.374021	6	26	0.229885	-0.898726	TRUE	mature_mRNA_like
Ctrl_SERIPH1st_1	Ctrl_Conv1st	ENSG00000116337.21	AMPD2	chr1	109616103	109632055	+	15952	9481	6314	12	36.9048	42.0041	7.00269	1.0552	0.159125	2.38127	1.34604	-0.346037	656	1320	0.496932	2.75815	TRUE	partially_spliced
Ctrl_SERIPH1st_1	Ctrl_Conv1st	ENSG00000168765.20	GSTM4	chr1	109656098	109665496	+	9398	5382	3856	3	0.27146	0.198967	0	0	0	1.89321	0	1	6	7	0.84507	-1.87049	FALSE	low_coverage
Ctrl_SERIPH1st_1	Ctrl_Conv1st	ENSG00000213366.14	GSTM2	chr1	109667347	109709551	+	42204	12852	29111	7	1.51159	4.81667	0.111264	0	0.064581	2.93137	1.88755	-0.887548	36	78	0.460948	-3.97406	TRUE	mature_mRNA_like
Ctrl_SERIPH1st_1	Ctrl_Conv1st	ENSG00000134184.14	GSTM1	chr1	109687339	109709039	+	21700	5230	16290	4	0	0	0.015347	0	0.133051	-0.20598	0.0824982	0.917502	2	3	0.645161	0.468868	FALSE	low_coverage
Ctrl_SERIPH1st_1	Ctrl_Conv1st	ENSG00000134201.13	GSTM5	chr1	109711745	109775428	+	63683	6524	57072	2	0	0	0.0197644	0.009929	0.165027	-0.260199	0.0903219	0.909678	3	6	0.491803	-0.211739	FALSE	low_coverage
Ctrl_SERIPH1st_1	Ctrl_Conv1st	ENSG00000134202.13	GSTM3	chr1	109733931	109741038	-	7107	4759	2176	4	10.5528	40.4896	0.0261949	0	0.00245293	6.39944	0.512602	0.487398	109	168	0.648424	-0.576047	TRUE	mature_mRNA_like
Ctrl_SERIPH1st_1	Ctrl_Conv1st	ENSG00000198758.12	EPS8L3	chr1	109750077	109764062	-	13985	3695	10002	13	0	0	0	0	0	0	0	1	0	0	0	0	FALSE	low_coverage
Ctrl_SERIPH1st_1	Ctrl_Conv1st	ENSG00000184371.15	CSF1	chr1	109910241	109930993	+	20752	5674	15000	10	9.22471	8.40936	1.7456	1.65814	0.157683	2.33697	0.685534	0.314466	28	264	0.10602	0.914618	TRUE	partially_spliced
Ctrl_SERIPH1st_1	Ctrl_Conv1st	ENSG00000168710.19	AHCYL1	chr1	109984764	110023742	+	38978	5133	33785	15	128.064	202.248	6.23306	5.67988	0.0463779	4.33895	0.761935	0.238065	1344	2897	0.463912	2.55622	TRUE	mature_mRNA_like
Ctrl_SERIPH1st_1	Ctrl_Conv1st	ENSG00000143093.16	STRIP1	chr1	110031576	110074641	+	43065	7383	35594	20	41.246	38.4611	9.25257	7.99005	0.182862	2.14431	0.695171	0.304829	573	2121	0.270143	-1.68116	TRUE	partially_spliced
Ctrl_SERIPH1st_1	Ctrl_Conv1st	ENSG00000156150.9	ALX3	chr1	110059869	110070672	-	10803	1976	8827	3	0	0	0.0342133	0	0.254917	-0.424528	0.353291	0.646709	0	1	0	0.95017	FALSE	low_coverage
Ctrl_SERIPH1st_1	Ctrl_Conv1st	ENSG00000186150.5	UBL4B	chr1	110112442	110113947	+	1505	1505			0.200664	0.200664							2	3	0.645161	-1.73697	FALSE	low_coverage
Ctrl_SERIPH1st_1	Ctrl_Conv1st	ENSG00000197106.8	SLC6A17	chr1	110150493	110202202	+	51709	6651	45058	11	0.172907	0	0.0484264	0	0.150705	0.878659	1.61409	-0.614088	3	14	0.212766	0.553845	FALSE	low_coverage
Ctrl_SERIPH1st_1	Ctrl_Conv1st	ENSG00000227091.2	SLC6A17-AS1	chr1	110165947	110172489	-	6542	1660	4882	4	0	0	0	0	0	0	0	1	0	0	0	0	FALSE	low_coverage
Ctrl_SERIPH1st_1	Ctrl_Conv1st	ENSG00000224965.2	KCNC4-DT	chr1	110208423	110212592	-	4169	2291	1878	3	3.05412	0	0.615549	0	0.16329	2.14012	1.08117	-0.0811659	2	27	0.0738007	5.40902	TRUE	unclassified
Ctrl_SERIPH1st_1	Ctrl_Conv1st	ENSG00000116396.15	KCNC4	chr1	110210313	110283100	+	72787	26071	46716	5	13.8244	12.1535	3.68501	5.94495	0.209264	1.87924	1.00187	-0.00186951	69	1778	0.0388055	-5.90388	TRUE	unclassified
Ctrl_SERIPH1st_1	Ctrl_Conv1st	ENSG00000227963.3	RBM15-AS1	chr1	110286374	110339216	-	52842	6570	46272	11	4.04033	1.98934	1.53218	1.10337	0.270106	1.34295	1.16393	-0.163933	8	325	0.0246078	-1.18838	TRUE	unclassified
Ctrl_SERIPH1st_1	Ctrl_Conv1st	ENSG00000162775.17	RBM15	chr1	110338505	110346681	+	8176	4670	3506	2	117.434	77.8209	44.7094	48.5543	0.27557	1.39121	0.126513	0.873487	30	2382	0.0125939	-0.658345	TRUE	unclassified
Ctrl_SERIPH1st_1	Ctrl_Conv1st	ENSG00000224699.13	LAMTOR5-AS1	chr1	110347115	110443817	+	96702	15877	80783	24	8.84651	0.926371	6.83076	0.634058	0.432949	0.368312	1.61947	-0.61947	33	2335	0.0141322	-5.90905	TRUE	unclassified
Ctrl_SERIPH1st_1	Ctrl_Conv1st	ENSG00000168679.19	SLC16A4	chr1	110362847	110391082	-	28235	3297	24938	10	2.81468	4.00595	0.16529	0.0686155	0.0536661	3.45769	0.999282	0.000717979	19	45	0.421286	-0.93042	TRUE	mature_mRNA_like
Ctrl_SERIPH1st_1	Ctrl_Conv1st	ENSG00000134248.15	LAMTOR5	chr1	110401248	110407942	-	6694	2388	4306	2	80.5574	129.579	2.06967	2.08491	0.0250181	5.21626	0.117316	0.882684	270	673	0.401129	0.881705	TRUE	mature_mRNA_like
Ctrl_SERIPH1st_1	Ctrl_Conv1st	ENSG00000143125.6	PROK1	chr1	110451148	110457358	+	6210	1393	4817	2	0	0	0	0	0	0	0	1	0	0	0	0	FALSE	low_coverage
Ctrl_SERIPH1st_1	Ctrl_Conv1st	ENSG00000235407.2	CYMP-AS1	chr1	110487679	110490281	-	2602	2374	228	1	0	0	0	0	0	0			0	0	0	0	FALSE	low_coverage
Ctrl_SERIPH1st_1	Ctrl_Conv1st	ENSG00000143105.7	KCNA10	chr1	110517216	110519175	-	1959	1959			0	0							0	0	0	0	FALSE	low_coverage
Ctrl_SERIPH1st_1	Ctrl_Conv1st	ENSG00000177301.17	KCNA2	chr1	110519836	110631474	-	111638	18995	92590	16	0.0158992	0	0	0	0	0.212871	0	1	0	1	0	-0.124553	FALSE	low_coverage
Ctrl_SERIPH1st_1	Ctrl_Conv1st	ENSG00000177272.10	KCNA3	chr1	110653559	110674940	-	21381	10130	11251	3	1.53919	1.71969	0.161052	0.183475	0.0894614	2.65057	0.0935433	0.906457	3	58	0.0516351	-0.994363	TRUE	mature_mRNA_like
Ctrl_SERIPH1st_1	Ctrl_Conv1st	ENSG00000143119.16	CD53	chr1	110871175	110899936	+	28761	2492	26269	11	0	0	0	0	0	0	0	1	0	0	0	0	FALSE	low_coverage
Ctrl_SERIPH1st_1	Ctrl_Conv1st	ENSG00000121931.17	LRIF1	chr1	110946651	110963988	-	17337	4063	13274	3	24.236	26.5556	3.02486	2.3184	0.110554	2.96123	0.287906	0.712094	30	467	0.0642261	0.907194	TRUE	mature_mRNA_like
Ctrl_SERIPH1st_1	Ctrl_Conv1st	ENSG00000156171.16	DRAM2	chr1	111115883	111140225	-	24342	7966	16376	11	19.0625	18.5208	6.65217	4.58854	0.257689	1.50486	0.699826	0.300174	230	870	0.264337	0.41101	TRUE	partially_spliced
Ctrl_SERIPH1st_1	Ctrl_Conv1st	ENSG00000134255.17	CEPT1	chr1	111139478	111185507	+	46029	9947	36082	12	23.5103	15.7945	6.42173	4.34987	0.213829	1.85609	0.628047	0.371953	271	1555	0.174265	0.986387	TRUE	partially_spliced
Ctrl_SERIPH1st_1	Ctrl_Conv1st	ENSG00000162777.18	DENND2D	chr1	111185968	111204535	-	18567	6720	11762	11	0	0	0	0	0	0	0	1	0	0	0	0	FALSE	low_coverage
Ctrl_SERIPH1st_1	Ctrl_Conv1st	ENSG00000064886.15	CHI3L2	chr1	111200770	111243440	+	42670	3295	39375	14	0	0	0.0306796	0	0.234769	-0.386034	0.122384	0.877616	0	4	0	0	FALSE	low_coverage
Ctrl_SERIPH1st_1	Ctrl_Conv1st	ENSG00000290764.1	CHIAP2	chr1	111280058	111286116	+	6058	2837	3126	7	0	0	0	0	0	0	0	1	0	0	0	0	FALSE	low_coverage
Ctrl_SERIPH1st_1	Ctrl_Conv1st	ENSG00000134216.19	CHIA	chr1	111290850	111320566	+	29716	4643	24986	8	0	0	0	0	0	0	0	1	0	0	0	0	FALSE	low_coverage
Ctrl_SERIPH1st_1	Ctrl_Conv1st	ENSG00000173947.14	CIMAP3	chr1	111346599	111353013	+	6414	3949	2465	4	0.076475	0	0	0	0	0.819464	0	1	1	1	0.909091	0.940357	FALSE	low_coverage
Ctrl_SERIPH1st_1	Ctrl_Conv1st	ENSG00000085465.14	OVGP1	chr1	111414318	111427735	-	13417	2520	10897	9	5.9881	5.70898	1.38185	1.64008	0.184988	2.03859	0.363648	0.636352	19	103	0.184287	0.628156	TRUE	partially_spliced
Ctrl_SERIPH1st_1	Ctrl_Conv1st	ENSG00000116455.14	WDR77	chr1	111439889	111449256	-	9367	2685	6682	10	259.688	266.542	16.484	14.4193	0.0596659	3.96947	0.578438	0.421562	836	2701	0.309504	1.21256	TRUE	mature_mRNA_like
Ctrl_SERIPH1st_1	Ctrl_Conv1st	ENSG00000116459.12	ATP5PB	chr1	111448110	111465941	+	17831	6687	11144	8	102.906	145.042	6.24031	2.10123	0.0571213	4.02204	1.09404	-0.094038	1842	2525	0.729476	0.536539	TRUE	mature_mRNA_like
Ctrl_SERIPH1st_1	Ctrl_Conv1st	ENSG00000143110.13	C1orf162	chr1	111473791	111478512	+	4721	2837	1884	6	1.23757	1.05407	0.979299	0.625203	0.422681	0.309525	1.02104	-0.0210436	2	18	0.110497	-0.0958015	TRUE	partially_spliced
Ctrl_SERIPH1st_1	Ctrl_Conv1st	ENSG00000121933.19	TMIGD3	chr1	111483347	111563962	-	80615	2428	78187	7	0.248764	0	0.00386283	0	0.0109544	1.74757	0.0174275	0.982573	0	3	0	0.321655	FALSE	low_coverage
Ctrl_SERIPH1st_1	Ctrl_Conv1st	ENSG00000282608.2	ADORA3	chr1	111499428	111503633	-	4205	2560	1645	1	0	0	0	0	0	0			0	0	0	0	FALSE	low_coverage
Ctrl_SERIPH1st_1	Ctrl_Conv1st	ENSG00000116473.16	RAP1A	chr1	111542217	111716691	+	174474	11042	163432	18	18.2591	6.2	1.40281	3.10241	0.0709855	3.61076	0.414409	0.585591	412	1441	0.285893	5.72692	TRUE	mature_mRNA_like
Ctrl_SERIPH1st_1	Ctrl_Conv1st	ENSG00000197852.12	INKA2	chr1	111680629	111755824	-	75195	6393	68802	4	6.06992	0	0.308363	0.335375	0.0475995	3.91733	0.62307	0.37693	5	200	0.0249875	-3.04117	TRUE	mature_mRNA_like
Ctrl_SERIPH1st_1	Ctrl_Conv1st	ENSG00000227811.4	INKA2-AS1	chr1	111739578	111747798	+	8220	2527	5693	3	0.378314	0.221239	0.256455	0.31524	0.349028	0.424238	0.680687	0.319313	0	8	0	-1.02889e-06	FALSE	low_coverage
Ctrl_SERIPH1st_1	Ctrl_Conv1st	ENSG00000064703.14	DDX20	chr1	111754831	111775602	+	20771	8874	11897	10	33.5815	20.5339	1.63915	1.55198	0.0464078	4.2755	0.810584	0.189416	335	1059	0.316306	-4.3161	TRUE	mature_mRNA_like
Ctrl_SERIPH1st_1	Ctrl_Conv1st	ENSG00000171385.12	KCND3	chr1	111770661	111989668	-	219007	19570	199437	10	0.220286	0	0.0234363	0	0.0681837	1.3756	0.267155	0.732845	1	30	0.0332226	-0.259521	FALSE	low_coverage
Ctrl_SERIPH1st_1	Ctrl_Conv1st	ENSG00000232558.1	KCND3-IT1	chr1	111853761	111856905	-	3144	376	2768	1	0	0	0	0	0	0			1	1	0.909091	0	FALSE	low_coverage
Ctrl_SERIPH1st_1	Ctrl_Conv1st	ENSG00000237556.1	KCND3-AS1	chr1	111909335	111910931	+	1596	777	819	3	0	0	0	0	0	0	0	1	0	0	0	0	FALSE	low_coverage
Ctrl_SERIPH1st_1	Ctrl_Conv1st	ENSG00000143079.16	CTTNBP2NL	chr1	112396201	112463456	+	67255	8126	59129	10	16.4675	10.2571	1.26807	1.09308	0.071098	3.59814	0.849191	0.150809	73	699	0.10442	1.67663	TRUE	mature_mRNA_like
Ctrl_SERIPH1st_1	Ctrl_Conv1st	ENSG00000134245.19	WNT2B	chr1	112466540	112530165	+	63625	12555	51070	8	0.927439	1	0.182651	0.035783	0.15094	1.86196	0.650021	0.349979	3	70	0.042796	0.739852	TRUE	unclassified
Ctrl_SERIPH1st_1	Ctrl_Conv1st	ENSG00000007341.20	ST7L	chr1	112523486	112620825	-	97339	8310	88993	23	12.6634	11.3867	2.78567	2.51469	0.179153	2.14504	1.18259	-0.182588	157	1182	0.132814	-0.698706	TRUE	partially_spliced
Ctrl_SERIPH1st_1	Ctrl_Conv1st	ENSG00000116489.14	CAPZA1	chr1	112619172	112671616	+	52444	4320	48124	12	166.01	131.677	4.41794	3.2742	0.0259074	5.20033	0.790197	0.209803	1036	3105	0.333645	2.4025	TRUE	mature_mRNA_like
Ctrl_SERIPH1st_1	Ctrl_Conv1st	ENSG00000155363.20	MOV10	chr1	112673140	112702383	+	29243	10394	18754	16	36.9098	42.9602	3.57838	1.55772	0.0881633	3.33076	1.41722	-0.417217	746	1504	0.495978	2.26159	TRUE	mature_mRNA_like
Ctrl_SERIPH1st_1	Ctrl_Conv1st	ENSG00000155366.18	RHOC	chr1	112701126	112707845	-	6719	5259	1425	3	71.9479	24.7763	0.59579	0.045455	0.00820153	6.69416	1.02396	-0.023961	513	1264	0.405822	4.05723	TRUE	mature_mRNA_like
Ctrl_SERIPH1st_1	Ctrl_Conv1st	ENSG00000155367.17	PPM1J	chr1	112709993	112715336	-	5343	2733	2610	9	6.90633	10.8535	0.717241	0.608871	0.092864	3.09982	0.868216	0.131784	40	70	0.570613	1.9799	TRUE	mature_mRNA_like
Ctrl_SERIPH1st_1	Ctrl_Conv1st	ENSG00000261595.2	PPM1J-DT	chr1	112715401	112717796	+	2395	2325			0	0							0	0	0	0	FALSE	low_coverage
Ctrl_SERIPH1st_1	Ctrl_Conv1st	ENSG00000184599.14	TAFA3	chr1	112718904	112727235	+	8331	1677	6654	5	0	0	0.0453863	0	0.312177	-0.539891	0.873464	0.126536	0	1	0	0	FALSE	low_coverage
Ctrl_SERIPH1st_1	Ctrl_Conv1st	ENSG00000226419.10	SLC16A1-AS1	chr1	112849482	113047059	+	197577	16600	180977	26	11.6736	2.45161	1.96785	2.63996	0.143205	2.50935	0.87423	0.12577	36	1853	0.0194269	3.29665	TRUE	mature_mRNA_like
Ctrl_SERIPH1st_1	Ctrl_Conv1st	ENSG00000155380.14	SLC16A1	chr1	112911846	112957593	-	45747	6864	38718	11	196.672	4.5449	5.45958	4.37259	0.0269967	5.14541	0.719921	0.280079	1412	5210	0.271012	3.81616	TRUE	mature_mRNA_like
Ctrl_SERIPH1st_1	Ctrl_Conv1st	ENSG00000238198.3	LRIG2-DT	chr1	113011686	113073113	-	61427	3086	58341	4	0.00745296	0	0.0711509	0.046991	0.398373	-0.671564	0.364271	0.635729	1	14	0.070922	-0.708765	FALSE	low_coverage
Ctrl_SERIPH1st_1	Ctrl_Conv1st	ENSG00000198799.13	LRIG2	chr1	113073178	113132260	+	59082	12540	46542	19	21.349	31.9224	2.88868	1.95863	0.118692	2.84333	0.721768	0.278232	251	1345	0.186603	1.36169	TRUE	mature_mRNA_like
Ctrl_SERIPH1st_1	Ctrl_Conv1st	ENSG00000081026.20	MAGI3	chr1	113390500	113685923	+	295423	8521	286902	24	38.9793	52.7153	1.67348	1.54018	0.0410642	4.46175	0.746688	0.253312	446	2714	0.164327	0.123507	TRUE	mature_mRNA_like
Ctrl_SERIPH1st_1	Ctrl_Conv1st	ENSG00000116793.17	PHTF1	chr1	113696051	113759908	-	63857	8209	55573	20	14.2898	19.8852	1.73232	1.30668	0.10745	2.97331	0.759566	0.240434	206	716	0.287669	0.20058	TRUE	mature_mRNA_like
Ctrl_SERIPH1st_1	Ctrl_Conv1st	ENSG00000081019.15	RSBN1	chr1	113761831	113812476	-	50645	6819	43826	8	22.4766	37.6076	2.30858	2.26954	0.0927694	3.22857	0.679275	0.320725	131	849	0.154281	0.114871	TRUE	mature_mRNA_like
Ctrl_SERIPH1st_1	Ctrl_Conv1st	ENSG00000226167.2	AP4B1-AS1	chr1	113812378	113901237	+	88859	5903	82956	14	0.511604	0	0.0109214	0	0.0175438	2.46306	0.36007	0.63993	1	13	0.0763359	-1.3062	FALSE	low_coverage
Ctrl_SERIPH1st_1	Ctrl_Conv1st	ENSG00000134242.17	PTPN22	chr1	113813810	113871753	-	57943	4572	53371	23	0	0	0.0218283	0	0.179173	-0.284849	0.35849	0.64151	0	4	0	0.601414	FALSE	low_coverage
Ctrl_SERIPH1st_1	Ctrl_Conv1st	ENSG00000188761.13	BCL2L15	chr1	113876815	113887581	-	10766	9095	1671	2	0.479384	1	0.16517	0.12766	0.221838	1.1276	0.560748	0.439252	0	16	0	-0.578386	FALSE	low_coverage
Ctrl_SERIPH1st_1	Ctrl_Conv1st	ENSG00000134262.16	AP4B1	chr1	113894193	113905722	-	11529	6596	4933	8	9.9339	18.411	4.64504	3.13522	0.316443	1.08039	0.502111	0.497889	76	297	0.255806	-0.0726179	TRUE	partially_spliced
Ctrl_SERIPH1st_1	Ctrl_Conv1st	ENSG00000118655.9	DCLRE1B	chr1	113904402	113914086	+	9684	4937	4663	3	42.9637	44.341	2.96054	3.27458	0.0643256	3.81462	0.677335	0.322665	112	755	0.148325	0.939549	TRUE	mature_mRNA_like
Ctrl_SERIPH1st_1	Ctrl_Conv1st	ENSG00000235527.8	HIPK1-AS1	chr1	113911899	113929551	-	17652	3630	14022	4	0.898623	0	0.0215375	0	0.0211119	3.03854	0.428753	0.571247	0	12	0	-2.95015	FALSE	low_coverage
Ctrl_SERIPH1st_1	Ctrl_Conv1st	ENSG00000163349.23	HIPK1	chr1	113929323	113977869	+	48546	9658	38693	22	72.2463	72.736	2.25374	1.74013	0.030211	4.94189	0.515708	0.484292	830	2616	0.317266	1.3652	TRUE	mature_mRNA_like
Ctrl_SERIPH1st_1	Ctrl_Conv1st	ENSG00000116774.13	OLFML3	chr1	113979023	114035572	+	56549	2909	53564	3	0.275352	0	0	0	0	1.90824	0	1	0	3	0	-0.559159	FALSE	low_coverage
Ctrl_SERIPH1st_1	Ctrl_Conv1st	ENSG00000134207.17	SYT6	chr1	114089290	114153880	-	64590	5065	59525	9	0.773346	0.332203	0.335825	0.201048	0.277732	1.0028	0.721979	0.278021	1	80	0.0124844	-0.406141	TRUE	unclassified
Ctrl_SERIPH1st_1	Ctrl_Conv1st	ENSG00000197323.13	TRIM33	chr1	114392780	114511244	-	118464	9837	108627	21	53.5386	90.2146	3.04652	2.223	0.0537446	4.09144	0.938828	0.0611724	813	2868	0.283463	1.98313	TRUE	mature_mRNA_like
Ctrl_SERIPH1st_1	Ctrl_Conv1st	ENSG00000116752.7	BCAS2	chr1	114567551	114581648	-	14097	1472	12625	7	113.809	204.975	3.536	3.7485	0.0301077	4.96939	0.700557	0.299443	456	714	0.638566	0.489333	TRUE	mature_mRNA_like
Ctrl_SERIPH1st_1	Ctrl_Conv1st	ENSG00000175984.17	DENND2C	chr1	114582847	114670451	-	87604	7566	80038	22	6.05022	5.32117	0.381494	0.172915	0.0584063	3.67505	0.956422	0.0435779	66	259	0.254728	1.45797	TRUE	mature_mRNA_like
Ctrl_SERIPH1st_1	Ctrl_Conv1st	ENSG00000116748.22	AMPD1	chr1	114673089	114695618	-	22529	3082	19366	14	0.00324467	0	0	0	0	0.0460673	0	1	2	2	0.952381	0	FALSE	low_coverage
Ctrl_SERIPH1st_1	Ctrl_Conv1st	ENSG00000213281.6	NRAS	chr1	114704468	114716771	-	12303	4493	7793	7	142.509	217.476	2.74567	1.5779	0.0188895	5.64715	0.811024	0.188976	495	2206	0.224378	1.69684	TRUE	mature_mRNA_like
Ctrl_SERIPH1st_1	Ctrl_Conv1st	ENSG00000009307.18	CSDE1	chr1	114716912	114758704	-	41792	14188	27560	21	220.96	143.917	8.78414	6.21469	0.0382179	4.63706	0.646941	0.353059	7265	11271	0.644569	2.39495	TRUE	mature_mRNA_like
Ctrl_SERIPH1st_1	Ctrl_Conv1st	ENSG00000052723.13	SIKE1	chr1	114769478	114780699	-	11221	5908	5270	3	50.4445	51.7801	3.58102	3.98867	0.0661615	3.77937	0.163791	0.836209	117	1059	0.110471	1.80324	TRUE	mature_mRNA_like
Ctrl_SERIPH1st_1	Ctrl_Conv1st	ENSG00000198765.12	SYCP1	chr1	114854862	114995370	+	140508	4278	136052	32	0	0	0	0	0	0	0	1	0	0	0	0	FALSE	low_coverage
Ctrl_SERIPH1st_1	Ctrl_Conv1st	ENSG00000134200.4	TSHB	chr1	115029825	115034302	+	4477	528	3949	2	0	0	0	0	0	0	0	1	0	0	0	0	FALSE	low_coverage
Ctrl_SERIPH1st_1	Ctrl_Conv1st	ENSG00000134198.11	TSPAN2	chr1	115048010	115089503	-	41493	3413	38080	8	1.8995	4.69444	0.700263	0.273593	0.259379	1.3211	0.867668	0.132332	9	111	0.0810081	-1.68257	TRUE	unclassified
Ctrl_SERIPH1st_1	Ctrl_Conv1st	ENSG00000228035.2	NGF-AS1	chr1	115229325	115368072	+	138747	5911	132750	10	0.102182	0	0	0	0	1.01566	0	1	0	2	0	0.195482	FALSE	low_coverage
Ctrl_SERIPH1st_1	Ctrl_Conv1st	ENSG00000134259.7	NGF	chr1	115285903	115338770	-	52867	6003	46864	9	0.112111	0	0.0886824	0	0.294829	0.168857	0.470037	0.529963	0	16	0	-0.720791	FALSE	low_coverage
Ctrl_SERIPH1st_1	Ctrl_Conv1st	ENSG00000173218.16	VANGL1	chr1	115641853	115698224	+	56371	10031	46317	10	29.5187	30.331	4.08522	3.85199	0.121209	2.82313	0.419147	0.580853	195	1617	0.120586	1.60813	TRUE	mature_mRNA_like
Ctrl_SERIPH1st_1	Ctrl_Conv1st	ENSG00000118729.16	CASQ2	chr1	115698037	115837921	-	139884	13292	126535	17	2.30974	0.283554	0.416217	0	0.147284	2.22283	2.18299	-1.18299	4	282	0.0141794	-3.60121	TRUE	mature_mRNA_like
Ctrl_SERIPH1st_1	Ctrl_Conv1st	ENSG00000177551.6	NHLH2	chr1	115836376	115843917	-	7541	7541			4.19374	4.19374							3	106	0.0282752	6.62629	TRUE	unclassified
Ctrl_SERIPH1st_1	Ctrl_Conv1st	ENSG00000163393.14	SLC22A15	chr1	115976476	116070054	+	93578	5335	88243	12	3.73796	4.99291	1.23886	1.19897	0.244023	1.51933	0.661621	0.338379	34	432	0.0786855	0.532926	TRUE	unclassified
Ctrl_SERIPH1st_1	Ctrl_Conv1st	ENSG00000173212.6	MAB21L3	chr1	116111398	116138149	+	26751	6927	19752	7	0.0435973	0	0	0	0	0.522028	0	1	0	1	0	0.460819	FALSE	low_coverage
Ctrl_SERIPH1st_1	Ctrl_Conv1st	ENSG00000163399.17	ATP1A1	chr1	116372667	116410261	+	37594	7516	30078	29	430.219	691.517	6.41878	4.66587	0.0146971	6.04466	0.636963	0.363037	8479	11425	0.742138	1.92235	TRUE	mature_mRNA_like
Ctrl_SERIPH1st_1	Ctrl_Conv1st	ENSG00000203865.13	ATP1A1-AS1	chr1	116378436	116421301	-	42865	14104	28761	14	1.52319	0.615786	0.877299	0.288374	0.350852	0.731955	0.98388	0.0161199	10	157	0.0636537	-3.24445	TRUE	unclassified
Ctrl_SERIPH1st_1	Ctrl_Conv1st	ENSG00000116815.17	CD58	chr1	116514533	116571039	-	56506	1784	54722	5	13.8901	9.95402	2.54159	2.28681	0.15374	2.40493	0.181614	0.818386	43	548	0.0784528	-0.63898	TRUE	unclassified
Ctrl_SERIPH1st_1	Ctrl_Conv1st	ENSG00000143061.19	IGSF3	chr1	116574398	116667820	-	93422	7573	85849	13	44.1011	51.003	1.47088	1.60891	0.0322054	4.81443	0.572887	0.427113	249	1532	0.162522	1.82751	TRUE	mature_mRNA_like
Ctrl_SERIPH1st_1	Ctrl_Conv1st	ENSG00000116824.6	CD2	chr1	116754369	116769229	+	14860	1794	13010	3	0	0	0	0	0	0	0	1	0	0	0	0	FALSE	low_coverage
Ctrl_SERIPH1st_1	Ctrl_Conv1st	ENSG00000134247.11	PTGFRN	chr1	116909893	116990358	+	80465	6515	73950	8	107.015	88.2053	3.88502	3.61945	0.0350002	4.74843	0.245037	0.754963	404	3287	0.122905	2.21188	TRUE	mature_mRNA_like
Ctrl_SERIPH1st_1	Ctrl_Conv1st	ENSG00000134256.14	CD101	chr1	117001720	117036552	+	34832	5838	28994	9	3.53631	2.59323	0.616231	0.115836	0.144909	2.34398	0.848073	0.151927	19	131	0.144928	-0.118376	TRUE	mature_mRNA_like
Ctrl_SERIPH1st_1	Ctrl_Conv1st	ENSG00000236137.2	CD101-AS1	chr1	117025480	117060845	-	35365	4071	31179	5	2.41906	1.36753	1.01895	1.52783	0.288002	1.17073	0.443882	0.556118	0	140	0	-1.22542	TRUE	unclassified
Ctrl_SERIPH1st_1	Ctrl_Conv1st	ENSG00000116830.13	TTF2	chr1	117060293	117107453	+	47160	10415	36658	23	56.6294	93.6759	5.59207	4.45418	0.0897294	3.31707	0.783724	0.216276	966	2661	0.363008	1.8648	TRUE	mature_mRNA_like
Ctrl_SERIPH1st_1	Ctrl_Conv1st	ENSG00000134253.10	TRIM45	chr1	117111059	117122587	-	11528	4368	7154	5	7.58883	8.82609	1.45513	1.50324	0.159136	2.30573	0.256449	0.743551	23	146	0.157426	0.931896	TRUE	partially_spliced
Ctrl_SERIPH1st_1	Ctrl_Conv1st	ENSG00000134258.19	VTCN1	chr1	117143586	117210960	-	67374	5414	61960	6	0	0	0	0	0	0	0	1	0	0	0	0	FALSE	low_coverage
Ctrl_SERIPH1st_1	Ctrl_Conv1st	ENSG00000198162.12	MAN1A2	chr1	117367448	117528872	+	161424	9667	151757	13	36.3777	72.2086	1.81775	1.44818	0.0474666	4.24952	0.370568	0.629432	434	2102	0.20646	0.309858	TRUE	mature_mRNA_like
Ctrl_SERIPH1st_1	Ctrl_Conv1st	ENSG00000236866.6	TENT5C-DT	chr1	117596829	117606654	-	9825	1380	8445	4	0	0	0	0	0	0	0	1	0	0	0	0	FALSE	low_coverage
Ctrl_SERIPH1st_1	Ctrl_Conv1st	ENSG00000183508.6	TENT5C	chr1	117606047	117628389	+	22342	6099	16243	3	12.5804	3.86834	1.7434	3.0295	0.120869	2.78216	0.295098	0.704902	7	350	0.0199943	2.22943	TRUE	mature_mRNA_like
Ctrl_SERIPH1st_1	Ctrl_Conv1st	ENSG00000196505.12	GDAP2	chr1	117863484	117929662	-	66178	11245	54908	14	16.8217	29.9089	2.04559	1.62266	0.107848	2.97943	0.678466	0.321534	198	1010	0.19602	1.55408	TRUE	mature_mRNA_like
Ctrl_SERIPH1st_1	Ctrl_Conv1st	ENSG00000065183.17	WDR3	chr1	117929062	117966543	+	37481	11324	26016	29	40.1801	108.397	2.97632	2.1299	0.0688065	3.71079	0.82819	0.17181	1227	1783	0.688127	-0.296678	TRUE	mature_mRNA_like
Ctrl_SERIPH1st_1	Ctrl_Conv1st	ENSG00000155761.14	SPAG17	chr1	117953589	118185228	-	231639	9828	221533	48	0.0965608	0	0.0378183	0	0.161355	0.512209	0.465985	0.534015	0	31	0	-0.411517	FALSE	low_coverage
Ctrl_SERIPH1st_1	Ctrl_Conv1st	ENSG00000092607.15	TBX15	chr1	118883045	118989556	-	106511	4344	102167	9	1.01611	0	0.149716	0.109898	0.118275	2.16012	0.672624	0.327376	0	66	0	-0.239529	TRUE	mature_mRNA_like
Ctrl_SERIPH1st_1	Ctrl_Conv1st	ENSG00000116874.13	WARS2	chr1	119030283	119140673	-	110390	4844	105450	7	27.7948	29.6747	1.6938	1.70641	0.057245	3.95891	0.301194	0.698806	112	1052	0.106454	1.1828	TRUE	mature_mRNA_like
Ctrl_SERIPH1st_1	Ctrl_Conv1st	ENSG00000224238.2	WARS2-IT1	chr1	119047404	119064785	+	17381	2060	15321	1	0	0	0	0	0	0			0	0	0	0	FALSE	low_coverage
Ctrl_SERIPH1st_1	Ctrl_Conv1st	ENSG00000231365.8	WARS2-AS1	chr1	119140390	119362600	+	222210	12600	209610	13	17.3965	8.56269	3.31354	2.91379	0.159228	2.35772	0.966326	0.0336741	45	3051	0.0147488	-5.29317	TRUE	unclassified
Ctrl_SERIPH1st_1	Ctrl_Conv1st	ENSG00000116882.16	HAO2	chr1	119368726	119394258	+	25532	2329	23203	10	0.178617	0	0.0702066	0	0.201267	0.710998	1.10578	-0.105783	2	7	0.28169	0.479548	FALSE	low_coverage
Ctrl_SERIPH1st_1	Ctrl_Conv1st	ENSG00000230921.1	HAO2-IT1	chr1	119368945	119370331	+	1386	311	1075	1	0	0	0	0	0	0			0	0	0	0	FALSE	low_coverage
Ctrl_SERIPH1st_1	Ctrl_Conv1st	ENSG00000203859.11	HSD3B2	chr1	119413724	119423035	+	9311	3670	5641	3	0	0	0.32122	0	0.762594	-2.07457	1.07364	-0.0736362	0	6	0	0.640195	FALSE	low_coverage
Ctrl_SERIPH1st_1	Ctrl_Conv1st	ENSG00000203857.10	HSD3B1	chr1	119507197	119515054	+	7857	2443	5359	2	0.123618	0	0	0	0	1.16104	0	1	0	1	0	1.18951	FALSE	low_coverage
Ctrl_SERIPH1st_1	Ctrl_Conv1st	ENSG00000143067.6	ZNF697	chr1	119619376	119648454	-	29078	5767	23311	2	15.4234	15.8065	2.79821	1.74727	0.152727	2.42122	0.669962	0.330038	14	517	0.0270741	1.22174	TRUE	unclassified
Ctrl_SERIPH1st_1	Ctrl_Conv1st	ENSG00000092621.14	PHGDH	chr1	119648410	119744227	+	95817	9196	86523	22	95.4548	12.0012	1.90466	5.23328	0.0195431	5.5749	0.787924	0.212076	2091	3475	0.601709	8.36099	TRUE	mature_mRNA_like
Ctrl_SERIPH1st_1	Ctrl_Conv1st	ENSG00000134240.13	HMGCS2	chr1	119747978	119769092	-	21114	4757	16357	9	0	0	0	0	0	0	0	1	0	0	0	0	FALSE	low_coverage
Ctrl_SERIPH1st_1	Ctrl_Conv1st	ENSG00000134193.16	REG4	chr1	119794016	119811580	-	17564	3414	14150	6	0.0878735	0	0	0	0	0.909762	0	1	1	1	0.909091	-0.00819045	FALSE	low_coverage
Ctrl_SERIPH1st_1	Ctrl_Conv1st	ENSG00000134249.7	ADAM30	chr1	119893532	119896515	-	2983	2983			0	0							0	0	0	0	FALSE	low_coverage
Ctrl_SERIPH1st_1	Ctrl_Conv1st	ENSG00000134250.22	NOTCH2	chr1	119911552	120100779	-	189227	16744	172435	39	121.248	138.733	1.95537	2.45774	0.0158583	5.8836	0.592569	0.407431	2654	7892	0.336286	4.9212	TRUE	mature_mRNA_like
Ctrl_SERIPH1st_1	Ctrl_Conv1st	ENSG00000265808.5	SEC22B	chr1	120150897	120176520	-	25623	9183	16342	6	27.8276	45.6818	4.37566	5.24241	0.135456	2.64152	0.471566	0.528434	370	1091	0.339107	0.192132	TRUE	mature_mRNA_like
Ctrl_SERIPH1st_1	Ctrl_Conv1st	ENSG00000270231.6	NBPF8	chr1	120415034	120469676	+	54642	8168	46474	28	12.3838	15.5922	3.86915	1.16682	0.236602	1.65316	1.0815	-0.0814988	169	942	0.179386	-0.696148	TRUE	partially_spliced
Ctrl_SERIPH1st_1	Ctrl_Conv1st	ENSG00000293296.1	PFN1P2	chr1	120432203	120434037	-	1834	1834			0	0							0	0	0	0	FALSE	low_coverage
Ctrl_SERIPH1st_1	Ctrl_Conv1st	ENSG00000286106.3	NOTCH2NLR	chr1	120723911	120794851	+	70940	2372	68568	3	0	0	0.0305245	0	0.23386	-0.384321	0.212853	0.787147	4	11	0.36036	-0.64814	FALSE	low_coverage
Ctrl_SERIPH1st_1	Ctrl_Conv1st	ENSG00000273136.9	NBPF26	chr1	120723944	120842229	+	118285	7206	110899	36	1.74147	0.712264	0.0501177	0	0.0264951	3.61669	1.05084	-0.0508391	45	66	0.680787	1.60891	TRUE	mature_mRNA_like
Ctrl_SERIPH1st_1	Ctrl_Conv1st	ENSG00000263353.4	PPIAL4A	chr1	120889770	120890530	+	760	760			0	0							0	0	0	0	FALSE	low_coverage
Ctrl_SERIPH1st_1	Ctrl_Conv1st	ENSG00000291135.2	FCGR1BP	chr1	121042601	121103109	+	60508	7920	52588	13	0.0757576	0	0.12615	0	0.417844	-0.363696	1.76246	-0.762457	0	24	0	2.3176	FALSE	low_coverage
Ctrl_SERIPH1st_1	Ctrl_Conv1st	ENSG00000291123.2	H2BP1	chr1	121085894	121118640	-	32746	8929	23817	8	0.119498	0	0.0503003	0	0.186437	0.546362	1.25927	-0.259269	0	8	0	0.395803	FALSE	low_coverage
Ctrl_SERIPH1st_1	Ctrl_Conv1st	ENSG00000188610.13	FAM72B	chr1	121167645	121185539	-	17894	3033	14861	4	27.6749	26.0409	0.999395	0.492546	0.0347322	4.659	0.650755	0.349245	71	329	0.21574	-0.321683	TRUE	mature_mRNA_like
Ctrl_SERIPH1st_1	Ctrl_Conv1st	ENSG00000171943.13	SRGAP2C	chr1	121184810	121392874	+	208064	7357	200683	10	17.792	31.2261	2.01381	2.15277	0.101167	3.0814	0.465742	0.534258	217	1786	0.121494	0.177752	TRUE	mature_mRNA_like
Ctrl_SERIPH1st_1	Ctrl_Conv1st	ENSG00000230806.2	SRGAP2-AS1	chr1	121360155	121398806	-	38651	2861	35694	4	0	0	0	0	0	0	0	1	0	0	0	0	FALSE	low_coverage
Ctrl_SERIPH1st_1	Ctrl_Conv1st	ENSG00000291141.2	EMBP1	chr1	121519011	121596933	+	77922	7591	70331	14	2.83243	3.11765	1.04295	0.833285	0.262353	1.35933	0.522482	0.477518	15	319	0.0470072	1.43854	TRUE	unclassified
Ctrl_SERIPH1st_1	Ctrl_Conv1st	ENSG00000273213.4	H3-7	chr1	143894543	143905977	-	11434	3970	7464	2	0.228464	0	0	0	0	1.71573	0	1	0	6	0	-1.86595	FALSE	low_coverage
Ctrl_SERIPH1st_1	Ctrl_Conv1st	ENSG00000263513.7	FAM72C	chr1	143955286	143971986	-	16700	2395	14305	3	5.0263	12.151	0.380706	0.293103	0.0691311	3.41469	0.569607	0.430393	17	60	0.282862	-0.971232	TRUE	mature_mRNA_like
Ctrl_SERIPH1st_1	Ctrl_Conv1st	ENSG00000271567.2	PPIAL4E	chr1	144372874	144373634	-	760	760			0.128947	0.128947							1	1	0.909091	-2.40551	FALSE	low_coverage
Ctrl_SERIPH1st_1	Ctrl_Conv1st	ENSG00000266338.8	NBPF15	chr1	144421389	144461676	-	40287	9788	30499	24	21.818	24.9884	4.8658	2.5901	0.181669	2.14202	1.14848	-0.14848	227	1217	0.186509	-0.0744819	TRUE	partially_spliced
Ctrl_SERIPH1st_1	Ctrl_Conv1st	ENSG00000279782.3	PPIAL4F	chr1	144592892	144593652	+	760	760			0	0							0	0	0	0	FALSE	low_coverage
Ctrl_SERIPH1st_1	Ctrl_Conv1st	ENSG00000305955.1	KMT2CP1	chr1	144643605	144679583	+	35978	2276	33669	8	0	0	0	0	0	0	0	1	0	0	0	0	FALSE	low_coverage
Ctrl_SERIPH1st_1	Ctrl_Conv1st	ENSG00000288905.3	LSP1P5	chr1	144715581	144789172	+	73591	6129	67462	11	0	0	0.0626723	0	0.385267	-0.701969	0.722733	0.277267	0	14	0	-1.0665	FALSE	low_coverage
Ctrl_SERIPH1st_1	Ctrl_Conv1st	ENSG00000196369.13	SRGAP2B	chr1	144887190	145095528	-	208338	7858	200480	11	5.45864	10.2081	1.48805	1.99269	0.21117	1.80747	0.526993	0.473007	52	1140	0.04561	0.393522	TRUE	unclassified
Ctrl_SERIPH1st_1	Ctrl_Conv1st	ENSG00000215784.7	FAM72D	chr1	145095970	145112696	+	16726	2426	14300	3	15.6241	29.2677	0.645105	0.720344	0.0394097	4.39939	0.201315	0.798685	34	157	0.216423	-1.48158	TRUE	mature_mRNA_like
Ctrl_SERIPH1st_1	Ctrl_Conv1st	ENSG00000289549.1	PPIAL4D	chr1	145241414	145242174	-	760	760			0	0							0	0	0	0	FALSE	low_coverage
Ctrl_SERIPH1st_1	Ctrl_Conv1st	ENSG00000162825.18	NBPF20	chr1	145289899	145425603	-	135704	19689	116015	142	3.55005	0	1.23429	0	0.252703	1.45185	2.77764	-1.77764	109	715	0.152426	-2.45088	TRUE	partially_spliced
Ctrl_SERIPH1st_1	Ctrl_Conv1st	ENSG00000291005.2	NBPF25P	chr1	145572344	145608551	-	36207	5335	30872	22	0.746017	0	0.227974	0	0.212268	1.36711	1.42622	-0.426222	9	40	0.224439	1.15133	FALSE	low_coverage
Ctrl_SERIPH1st_1	Ctrl_Conv1st	ENSG00000117262.20	GPR89A	chr1	145607981	145670980	+	62999	5975	57006	16	9.22745	2.94346	1.7442	1.65425	0.157538	2.33849	0.907669	0.0923309	106	517	0.204989	-0.874694	TRUE	partially_spliced
Ctrl_SERIPH1st_1	Ctrl_Conv1st	ENSG00000174827.15	PDZK1	chr1	145670847	145708148	-	37301	5947	31354	17	0.164789	0	0.0554315	0	0.173104	0.768563	0.599361	0.400639	4	12	0.330579	0.43355	FALSE	low_coverage
Ctrl_SERIPH1st_1	Ctrl_Conv1st	ENSG00000117281.17	CD160	chr1	145719442	145740760	+	21318	5475	15843	4	0	0	0	0	0	0	0	1	0	0	0	0	FALSE	low_coverage
Ctrl_SERIPH1st_1	Ctrl_Conv1st	ENSG00000265491.6	RNF115	chr1	145738867	145824095	-	85228	11059	74169	8	15.0793	62.6528	1.81169	1.71583	0.106626	2.98919	0.357989	0.642011	197	1014	0.194261	1.53513	TRUE	mature_mRNA_like
Ctrl_SERIPH1st_1	Ctrl_Conv1st	ENSG00000186141.11	POLR3C	chr1	145823958	145844721	+	20763	12481	8282	9	22.9802	24.7676	4.33844	4.56209	0.15823	2.37853	0.63534	0.36466	528	1084	0.48704	-0.358429	TRUE	partially_spliced
Ctrl_SERIPH1st_1	Ctrl_Conv1st	ENSG00000186364.13	NUDT17	chr1	145845602	145848954	+	3352	1684	1668	6	13.3023	14.0709	3.55276	2.35796	0.20954	1.87542	0.804352	0.195648	28	95	0.294427	0.374621	TRUE	partially_spliced
Ctrl_SERIPH1st_1	Ctrl_Conv1st	ENSG00000131788.17	PIAS3	chr1	145848520	145859836	-	11316	4807	6429	10	36.9322	38.9607	1.53212	1.03252	0.039729	4.50396	0.790268	0.209732	196	627	0.31255	0.907938	TRUE	mature_mRNA_like
Ctrl_SERIPH1st_1	Ctrl_Conv1st	ENSG00000198483.14	ANKRD35	chr1	145866559	145886088	-	19529	3396	16133	14	0	0	0	0	0	0	0	1	3	3	0.967742	0	FALSE	low_coverage
Ctrl_SERIPH1st_1	Ctrl_Conv1st	ENSG00000143127.14	ITGA10	chr1	145891205	145910111	-	18906	6244	12566	26	0.0967329	0	0.116505	0	0.371937	-0.138161	0.944949	0.0550514	3	10	0.29703	-1.25125	FALSE	low_coverage
Ctrl_SERIPH1st_1	Ctrl_Conv1st	ENSG00000131779.12	PEX11B	chr1	145911348	145918730	-	7382	1732	5650	4	37.5167	31.9569	1.54035	1.38444	0.0393378	4.5193	0.594436	0.405564	49	249	0.196708	1.68336	TRUE	mature_mRNA_like
Ctrl_SERIPH1st_1	Ctrl_Conv1st	ENSG00000293505.1	GNRHR2	chr1	145919012	145925341	+	6329	2647	3682	2	1.04269	0.079696	0.244432	0.139189	0.176215	1.73014	0.581921	0.418079	0	15	0	-3.64955	TRUE	unclassified
Ctrl_SERIPH1st_1	Ctrl_Conv1st	ENSG00000265241.9	RBM8A	chr1	145921064	145928067	-	7003	6201	802	4	111.631	97.0607	1.83292	0.694485	0.0161399	5.85311	1.02617	-0.0261653	709	2324	0.305064	-0.104414	TRUE	mature_mRNA_like
Ctrl_SERIPH1st_1	Ctrl_Conv1st	ENSG00000234222.7	LIX1L-AS1	chr1	145926589	145959179	+	32590	3365	29138	13	0.655869	0	0.675064	0	0.471765	-0.0361781	1.65941	-0.659412	2	74	0.0269906	-3.73377	TRUE	unclassified
Ctrl_SERIPH1st_1	Ctrl_Conv1st	ENSG00000271601.5	LIX1L	chr1	145933422	145958017	-	24595	3991	20604	5	59.7334	66.9803	1.11595	1.12621	0.0183094	5.6208	0.50928	0.49072	168	877	0.19154	3.0326	TRUE	mature_mRNA_like
Ctrl_SERIPH1st_1	Ctrl_Conv1st	ENSG00000272031.4	ANKRD34A	chr1	145959440	145964575	-	5135	4012	1123	3	5.62338	5.27204	4.30632	1.912	0.429357	0.377292	0.581328	0.418672	12	95	0.126183	0.00309709	TRUE	pre_mRNA_like
Ctrl_SERIPH1st_1	Ctrl_Conv1st	ENSG00000121851.14	POLR3GL	chr1	145964689	145978848	+	14159	1927	12232	5	10.6466	20.1929	0.498937	0.612413	0.0443676	4.16533	0.788679	0.211321	53	90	0.588235	2.65614	TRUE	mature_mRNA_like
Ctrl_SERIPH1st_1	Ctrl_Conv1st	ENSG00000265972.7	TXNIP	chr1	145992434	145996580	-	4146	3605	477	3	22.3479	18.617	4.98952	1.13393	0.181851	2.14098	1.14477	-0.144772	140	281	0.498043	0.239071	TRUE	partially_spliced
Ctrl_SERIPH1st_1	Ctrl_Conv1st	ENSG00000168509.21	HJV	chr1	146017467	146036746	-	19279	3666	15613	3	0	0	0.239288	0	0.705265	-1.76251	0.64767	0.35233	3	16	0.186335	-2.89902	FALSE	low_coverage
Ctrl_SERIPH1st_1	Ctrl_Conv1st	ENSG00000271425.10	NBPF10	chr1	146064710	146229000	-	164290	14155	150135	94	4.15705	0	0.802171	0	0.158556	2.23838	1.7394	-0.739401	117	603	0.193998	0.34003	TRUE	partially_spliced
Ctrl_SERIPH1st_1	Ctrl_Conv1st	ENSG00000264343.8	NOTCH2NLA	chr1	146145928	146229073	-	83145	13006	70139	8	2.87191	2.77534	0.617574	0.446086	0.172051	2.05019	1.56809	-0.568086	14	273	0.0512633	2.05683	TRUE	unclassified
Ctrl_SERIPH1st_1	Ctrl_Conv1st	ENSG00000270339.4	PPIAL4H	chr1	146344005	146344765	-	760	760			0	0							3	3	0.967742	0	FALSE	low_coverage
Ctrl_SERIPH1st_1	Ctrl_Conv1st	ENSG00000268043.10	NBPF12	chr1	146938323	146996202	+	57879	7903	49976	37	13.6653	11.2355	3.17318	1.76655	0.187336	2.07227	0.863178	0.136822	161	897	0.179467	-0.257956	TRUE	partially_spliced
Ctrl_SERIPH1st_1	Ctrl_Conv1st	ENSG00000131791.9	PRKAB2	chr1	147155105	147173716	-	18611	5795	12816	8	35.7372	50.3768	4.91487	5.5802	0.120604	2.83717	0.647803	0.352197	125	901	0.138719	3.02475	TRUE	mature_mRNA_like
Ctrl_SERIPH1st_1	Ctrl_Conv1st	ENSG00000131781.14	FMO5	chr1	147175350	147243050	-	67700	8064	59546	9	0.296255	0	0.130185	0	0.247293	0.783635	0.666517	0.333483	3	35	0.0854701	-1.36882	FALSE	low_coverage
Ctrl_SERIPH1st_1	Ctrl_Conv1st	ENSG00000131778.21	CHD1L	chr1	147242642	147295767	+	53125	4425	48620	24	85.3575	90.8155	9.47507	9.40587	0.0998084	3.15785	0.560898	0.439102	1004	2807	0.357664	0.830667	TRUE	mature_mRNA_like
Ctrl_SERIPH1st_1	Ctrl_Conv1st	ENSG00000116128.12	BCL9	chr1	147541500	147626216	+	84716	6331	78385	10	61.1401	60.5457	1.68042	2.30817	0.0267071	5.10418	0.565777	0.434223	239	1733	0.137903	2.97748	TRUE	mature_mRNA_like
Ctrl_SERIPH1st_1	Ctrl_Conv1st	ENSG00000162836.13	ACP6	chr1	147629651	147670531	-	40880	12024	28810	7	12.7144	18.6923	4.85318	3.32574	0.274694	1.37134	0.738264	0.261736	163	977	0.16682	0.403604	TRUE	partially_spliced
Ctrl_SERIPH1st_1	Ctrl_Conv1st	ENSG00000265107.4	GJA5	chr1	147756198	147773362	-	17164	4571	12593	4	2.82061	0.641509	0.481776	0.299248	0.1416	2.32773	0.605668	0.394332	0	63	0	1.93659	TRUE	mature_mRNA_like
Ctrl_SERIPH1st_1	Ctrl_Conv1st	ENSG00000121634.6	GJA8	chr1	147902794	147909269	+	6475	1392	5083	1	0	0	0	0	0	0			0	0	0	0	FALSE	low_coverage
Ctrl_SERIPH1st_1	Ctrl_Conv1st	ENSG00000188092.16	GPR89B	chr1	147928392	147993592	+	65200	5247	59953	12	6.97656	5.50909	2.2718	2.13744	0.243016	1.57707	0.468452	0.531548	52	575	0.0904191	-0.313314	TRUE	unclassified
Ctrl_SERIPH1st_1	Ctrl_Conv1st	ENSG00000263956.9	NBPF11	chr1	148102041	148152342	-	50301	6248	44053	26	13.3777	13.9508	4.05845	3.14692	0.231433	1.69646	0.593434	0.406566	90	877	0.102611	-0.229942	TRUE	partially_spliced
Ctrl_SERIPH1st_1	Ctrl_Conv1st	ENSG00000291232.2	PDE4DIPP6	chr1	148402101	148432549	+	30448	7248	23180	9	0.547737	0.195217	0.514236	0.207177	0.442554	0.0766154	1.01434	-0.014343	5	55	0.0907441	-1.93405	TRUE	unclassified
Ctrl_SERIPH1st_1	Ctrl_Conv1st	ENSG00000236334.3	PPIAL4G	chr1	148482547	148483302	-	755	755			0	0							0	0	0	0	FALSE	low_coverage
Ctrl_SERIPH1st_1	Ctrl_Conv1st	ENSG00000270629.7	NBPF14	chr1	148531384	148679742	-	148358	11985	136373	75	7.19074	0.232323	1.25181	0	0.146538	2.43117	1.36614	-0.366141	113	857	0.13184	0.997094	TRUE	mature_mRNA_like
Ctrl_SERIPH1st_1	Ctrl_Conv1st	ENSG00000286019.4	NOTCH2NLB	chr1	148597330	148679746	-	82416	9203	73213	5	5.29599	7.17979	0.820141	1.688	0.131938	2.55196	0.648129	0.351871	36	365	0.0986031	1.28404	TRUE	mature_mRNA_like
Ctrl_SERIPH1st_1	Ctrl_Conv1st	ENSG00000177144.8	NUDT4B	chr1	148748773	148752415	+	3642	3642			0	0							0	0	0	0	FALSE	low_coverage
Ctrl_SERIPH1st_1	Ctrl_Conv1st	ENSG00000178104.22	PDE4DIP	chr1	148808139	149048286	+	240147	37693	202358	55	11.5	1.77907	0.556044	0.247338	0.0457421	4.14419	1.43618	-0.43618	573	1817	0.315338	3.30069	TRUE	mature_mRNA_like
Ctrl_SERIPH1st_1	Ctrl_Conv1st	ENSG00000269713.10	NBPF9	chr1	149052185	149103591	-	51406	15550	35759	27	15.2316	16.6476	3.16085	1.03103	0.170927	2.23318	1.02483	-0.0248252	262	1170	0.223912	-0.959857	TRUE	partially_spliced
Ctrl_SERIPH1st_1	Ctrl_Conv1st	ENSG00000286219.2	NOTCH2NLC	chr1	149390620	149471833	+	81213	9139	72074	6	5.7282	3.81154	1.5344	1.28586	0.208404	1.83429	0.463796	0.536204	3	547	0.00548346	0.264866	TRUE	unclassified
Ctrl_SERIPH1st_1	Ctrl_Conv1st	ENSG00000271383.10	NBPF19	chr1	149475044	149556361	+	81317	13941	67376	93	4.48469	0	0.458012	0	0.0908267	3.03846	2.57171	-1.57171	47	313	0.150112	-0.442431	TRUE	mature_mRNA_like
Ctrl_SERIPH1st_1	Ctrl_Conv1st	ENSG00000288867.1	PPIAL4C	chr1	149583847	149584607	+	760	760			0.397368	0.397368							0	2	0	-3.71207	FALSE	low_coverage
Ctrl_SERIPH1st_1	Ctrl_Conv1st	ENSG00000150337.15	FCGR1A	chr1	149782649	149792526	+	9877	3030	6770	4	0	0	0	0	0	0	0	1	0	0	0	0	FALSE	low_coverage
Ctrl_SERIPH1st_1	Ctrl_Conv1st	ENSG00000203814.7	H2BC18	chr1	149782688	149812373	-	29685	1798	27887	4	1245.58	0.022727	0.421558	0.670953	0.0003383	11.2218	0.728601	0.271399	9	7495	0.00120078	-9.27723	TRUE	mature_mRNA_like
Ctrl_SERIPH1st_1	Ctrl_Conv1st	ENSG00000183598.4	H3C13	chr1	149813224	149813693	-	469	469			844.648	844.648							3	1325	0.00226398	-0.725826	TRUE	unclassified
Ctrl_SERIPH1st_1	Ctrl_Conv1st	ENSG00000270882.3	H4C14	chr1	149832656	149839767	+	7111	1878	5233	2	1.99095	1.85915	0.444869	0.234536	0.175434	1.94018	0.701078	0.298922	5	21	0.236967	-1.23569	TRUE	partially_spliced
Ctrl_SERIPH1st_1	Ctrl_Conv1st	ENSG00000203811.2	H3C14	chr1	149840686	149841208	-	522	522			4.33525	4.33525							4	13	0.305344	-0.844963	TRUE	unclassified
Ctrl_SERIPH1st_1	Ctrl_Conv1st	ENSG00000288825.1	H2AC18	chr1	149842217	149842750	-	533	533			20.6173	20.6173							5	46	0.10846	0.255111	TRUE	unclassified
Ctrl_SERIPH1st_1	Ctrl_Conv1st	ENSG00000288859.2	H2AC19	chr1	149851060	149851652	+	592	592			6.4527	6.4527							1	16	0.0621118	-1.74759	TRUE	unclassified
Ctrl_SERIPH1st_1	Ctrl_Conv1st	ENSG00000203852.4	H3C15	chr1	149852607	149853125	+	518	518			5.06178	5.06178							2	13	0.152672	-2.11272	TRUE	unclassified
Ctrl_SERIPH1st_1	Ctrl_Conv1st	ENSG00000270276.3	H4C15	chr1	149854044	149861159	-	7115	1878	5237	2	0.839191	0	0.163452	0.0861685	0.148237	1.83388	0.462852	0.537148	6	17	0.350877	-1.12934	TRUE	unclassified
Ctrl_SERIPH1st_1	Ctrl_Conv1st	ENSG00000184678.11	H2BC21	chr1	149884458	149886682	-	2224	2224			310.947	310.947							6	2326	0.00257942	-8.26474	TRUE	unclassified
Ctrl_SERIPH1st_1	Ctrl_Conv1st	ENSG00000184260.6	H2AC20	chr1	149886917	149887411	+	494	494			2371.52	2371.52							6	3901	0.00153803	-0.0237431	TRUE	unclassified
Ctrl_SERIPH1st_1	Ctrl_Conv1st	ENSG00000184270.6	H2AC21	chr1	149887468	149887965	-	497	497			757.08	757.08							2	1253	0.00159604	0.15837	TRUE	unclassified
Ctrl_SERIPH1st_1	Ctrl_Conv1st	ENSG00000178096.10	BOLA1	chr1	149887889	149900798	+	12909	1461	11448	2	15.8179	5.05166	0.511443	3.91816	0.0311298	4.70229	0.86475	0.13525	13	103	0.126091	2.97917	TRUE	mature_mRNA_like
Ctrl_SERIPH1st_1	Ctrl_Conv1st	ENSG00000159164.11	SV2A	chr1	149903317	149918572	-	15255	4958	10297	14	16.2182	13.6135	0.59192	0.007144	0.0350038	4.55974	0.932065	0.0679346	87	292	0.297843	1.58689	TRUE	mature_mRNA_like
Ctrl_SERIPH1st_1	Ctrl_Conv1st	ENSG00000143368.11	SF3B4	chr1	149923316	149927803	-	4487	1704	2783	6	342.326	385.86	15.2659	7.11086	0.0426789	4.47799	0.594349	0.405651	1243	2091	0.594424	-0.837155	TRUE	mature_mRNA_like
Ctrl_SERIPH1st_1	Ctrl_Conv1st	ENSG00000014914.22	MTMR11	chr1	149928650	149937523	-	8873	4613	4084	11	1.08151	1.02386	0.687806	0	0.367946	0.584718	1.24324	-0.243238	13	27	0.479705	0.545529	TRUE	partially_spliced
Ctrl_SERIPH1st_1	Ctrl_Conv1st	ENSG00000264522.7	OTUD7B	chr1	149937811	150010758	-	72947	12671	60276	12	18.209	24.9732	2.3542	2.11652	0.113932	2.89922	0.65613	0.34387	198	1250	0.158387	1.19637	TRUE	mature_mRNA_like
Ctrl_SERIPH1st_1	Ctrl_Conv1st	ENSG00000136631.17	VPS45	chr1	150067278	150145329	+	78051	12971	64992	18	17.1035	18.2428	2.69279	2.20608	0.135341	2.62292	0.473819	0.526181	405	1333	0.303803	-0.351775	TRUE	mature_mRNA_like
Ctrl_SERIPH1st_1	Ctrl_Conv1st	ENSG00000023902.14	PLEKHO1	chr1	150149182	150164720	+	15538	6629	8909	8	13.3384	9.2221	5.54002	2.07447	0.291912	1.25259	1.01674	-0.016736	116	463	0.250486	-2.01813	TRUE	partially_spliced
Ctrl_SERIPH1st_1	Ctrl_Conv1st	ENSG00000143401.16	ANP32E	chr1	150218416	150236202	-	17786	3650	14135	7	122.701	55.1422	3.42405	2.75394	0.0271266	5.12294	0.518446	0.481554	404	1658	0.243652	1.97028	TRUE	mature_mRNA_like
Ctrl_SERIPH1st_1	Ctrl_Conv1st	ENSG00000118298.13	CA14	chr1	150257250	150265078	+	7828	3299	4529	9	0.113671	0	0.0505631	0	0.191357	0.505021	1.03336	-0.0333602	0	2	0	-1.83778	FALSE	low_coverage
Ctrl_SERIPH1st_1	Ctrl_Conv1st	ENSG00000117362.14	APH1A	chr1	150265398	150269580	-	4182	3473	597	3	146.655	80.2311	3.47069	4.83233	0.0231031	5.36107	0.493968	0.506032	439	1704	0.257614	3.07366	TRUE	mature_mRNA_like
Ctrl_SERIPH1st_1	Ctrl_Conv1st	ENSG00000118292.10	C1orf54	chr1	150268033	150281735	+	13702	3897	9763	6	0.464716	0.586812	0.0453754	0	0.0743747	1.95774	0.738365	0.261635	4	8	0.493827	-0.155597	FALSE	low_coverage
Ctrl_SERIPH1st_1	Ctrl_Conv1st	ENSG00000159208.16	CIART	chr1	150282542	150287093	+	4551	2849	1610	3	0.896455	1.78916	0.101863	0	0.0927447	2.30343	0.536629	0.463371	4	9	0.43956	1.37233	FALSE	low_coverage
Ctrl_SERIPH1st_1	Ctrl_Conv1st	ENSG00000266472.7	MRPS21	chr1	150293853	150308981	+	15128	1530	13598	1	147.623	158.812	7.19643	7.19643	0.0464527	4.33956			167	1088	0.153479	-0.252815	TRUE	mature_mRNA_like
Ctrl_SERIPH1st_1	Ctrl_Conv1st	ENSG00000117360.14	PRPF3	chr1	150321478	150353233	+	31755	6049	25706	15	46.5841	66.2814	3.32545	2.93371	0.0664963	3.76857	0.585247	0.414753	613	1235	0.496316	0.757159	TRUE	mature_mRNA_like
Ctrl_SERIPH1st_1	Ctrl_Conv1st	ENSG00000163125.17	RPRD2	chr1	150363090	150476566	+	113476	9281	104195	12	58.689	60.1928	1.74824	1.25312	0.0288788	4.99132	0.641467	0.358533	337	2431	0.13862	1.88252	TRUE	mature_mRNA_like
Ctrl_SERIPH1st_1	Ctrl_Conv1st	ENSG00000143374.19	TARS2	chr1	150487324	150507613	+	20289	4157	16055	16	74.4828	94.9437	1.66702	2.42163	0.0218626	5.39945	0.83348	0.16652	780	1126	0.692656	0.0546967	TRUE	mature_mRNA_like
Ctrl_SERIPH1st_1	Ctrl_Conv1st	ENSG00000143369.16	ECM1	chr1	150507988	150513789	+	5801	3433	2289	5	3.01282	2	0.372652	0.354207	0.106916	2.71937	0.715824	0.284176	4	41	0.0973236	1.15882	TRUE	mature_mRNA_like
Ctrl_SERIPH1st_1	Ctrl_Conv1st	ENSG00000228126.2	FALEC	chr1	150515666	150537267	+	21601	3245	18287	5	0.730663	0.976744	0.569749	0.638246	0.406844	0.310642	0.937914	0.0620856	1	45	0.0221729	-2.56951	TRUE	unclassified
Ctrl_SERIPH1st_1	Ctrl_Conv1st	ENSG00000237781.3	ADAMTSL4-AS2	chr1	150548561	150557724	-	9163	665	8403	4	2.42256	1.78312	1.21385	1.10802	0.324871	0.941083	0.245069	0.754931	0	42	0	0.437837	TRUE	unclassified
Ctrl_SERIPH1st_1	Ctrl_Conv1st	ENSG00000143382.17	ADAMTSL4	chr1	150549368	150560937	+	11569	6553	4819	18	0.617885	0	0.152729	0	0.175427	1.50616	1.18892	-0.188918	4	16	0.248447	2.98501	FALSE	low_coverage
Ctrl_SERIPH1st_1	Ctrl_Conv1st	ENSG00000203804.5	ADAMTSL4-AS1	chr1	150560201	150562115	-	1914	1914			2.75601	2.75601							0	20	0	-0.640564	TRUE	unclassified
Ctrl_SERIPH1st_1	Ctrl_Conv1st	ENSG00000143384.14	MCL1	chr1	150560894	150579738	-	18844	6222	12622	3	140.604	3.13399	2.72009	2.21022	0.0189654	5.64078	0.363158	0.636842	243	3032	0.0801425	-6.29081	TRUE	mature_mRNA_like
Ctrl_SERIPH1st_1	Ctrl_Conv1st	ENSG00000143420.20	ENSA	chr1	150600850	150629612	-	28762	4754	24008	6	103.129	86.6949	13.6317	12.6211	0.11665	2.91026	0.276817	0.723183	507	2743	0.184827	-4.40139	TRUE	mature_mRNA_like
Ctrl_SERIPH1st_1	Ctrl_Conv1st	ENSG00000143457.12	GOLPH3L	chr1	150646227	150697219	-	50992	3978	47012	6	50.1966	36.8368	2.09368	1.98487	0.0399631	4.51904	0.450938	0.549062	157	993	0.158091	1.32025	TRUE	mature_mRNA_like
Ctrl_SERIPH1st_1	Ctrl_Conv1st	ENSG00000143452.16	HORMAD1	chr1	150698059	150720895	-	22836	2412	20342	14	0	0	0	0	0	0	0	1	1	1	0.909091	0	FALSE	low_coverage
Ctrl_SERIPH1st_1	Ctrl_Conv1st	ENSG00000163131.13	CTSS	chr1	150730078	150765957	-	35879	7064	28815	9	0.128256	0	0.0417838	0	0.154732	0.686959	0.289141	0.710859	2	8	0.246914	0.905813	FALSE	low_coverage
Ctrl_SERIPH1st_1	Ctrl_Conv1st	ENSG00000143387.15	CTSK	chr1	150794879	150809577	-	14698	8471	6227	2	1.07496	1.03328	0.552594	0.67835	0.31987	0.848357	0.579207	0.420793	9	45	0.199557	-0.0667844	TRUE	partially_spliced
Ctrl_SERIPH1st_1	Ctrl_Conv1st	ENSG00000143437.22	ARNT	chr1	150808616	150876771	-	68155	7742	60413	25	34.9472	25.216	1.4874	1.19019	0.040712	4.46456	0.826551	0.173449	579	1207	0.479662	2.757	TRUE	mature_mRNA_like
Ctrl_SERIPH1st_1	Ctrl_Conv1st	ENSG00000283324.1	CTXND2	chr1	150887135	150913292	+	26157	1229	24928	1	0	0	0	0	0	0			0	0	0	0	FALSE	low_coverage
Ctrl_SERIPH1st_1	Ctrl_Conv1st	ENSG00000143379.14	SETDB1	chr1	150926262	150964744	+	38482	7406	30806	18	63.9403	75.6188	2.82789	2.43277	0.0422905	4.45105	0.625862	0.374138	1006	1878	0.535648	1.29754	TRUE	mature_mRNA_like
Ctrl_SERIPH1st_1	Ctrl_Conv1st	ENSG00000143418.21	CERS2	chr1	150960582	150977396	-	16814	6521	10056	18	149.597	14.3704	4.44859	4.28845	0.0288596	5.04048	0.892076	0.107924	1835	3410	0.538107	1.40609	TRUE	mature_mRNA_like
Ctrl_SERIPH1st_1	Ctrl_Conv1st	ENSG00000259357.2	CERS2-AS1	chr1	150965244	150966256	+	1012	778	167	1	0.789203	1.45454	0.502994	0.502994	0.361295	0.560369			2	4	0.487805	2.30815	TRUE	partially_spliced
Ctrl_SERIPH1st_1	Ctrl_Conv1st	ENSG00000143412.11	ANXA9	chr1	150981320	150996077	+	14757	2970	11448	11	0.305051	0.505443	0	0	0	2.0181	0	1	2	3	0.645161	-1.46574	FALSE	low_coverage
Ctrl_SERIPH1st_1	Ctrl_Conv1st	ENSG00000143409.19	MINDY1	chr1	150995124	151008376	-	13252	6333	6855	9	16.3603	23.9091	1.28505	0.329243	0.0724159	3.57099	1.00171	-0.00170732	75	380	0.197316	0.275988	TRUE	mature_mRNA_like
Ctrl_SERIPH1st_1	Ctrl_Conv1st	ENSG00000143363.18	PRUNE1	chr1	151008419	151035713	+	27294	3156	24138	8	49.8679	52.9319	1.32066	0.962563	0.0257495	5.13637	0.59157	0.40843	176	633	0.277997	2.1335	TRUE	mature_mRNA_like
Ctrl_SERIPH1st_1	Ctrl_Conv1st	ENSG00000163141.21	BNIPL	chr1	151036320	151047720	+	11400	3809	7591	9	1.00263	1.10647	0.297062	0.006211	0.212235	1.47351	0.993145	0.00685488	5	23	0.21645	0.0807247	TRUE	partially_spliced
Ctrl_SERIPH1st_1	Ctrl_Conv1st	ENSG00000143443.10	C1orf56	chr1	151047750	151051986	+	4236	2320	1916	3	16.028	3.3304	2.28758	2.28297	0.12422	2.75595	0.300703	0.699297	5	139	0.0359454	-3.84778	TRUE	mature_mRNA_like
Ctrl_SERIPH1st_1	Ctrl_Conv1st	ENSG00000197622.14	CDC42SE1	chr1	151050970	151070325	-	19355	5276	14079	8	67.276	13.0258	4.36338	4.39525	0.0608227	3.91603	0.92656	0.0734399	162	1393	0.116287	4.84389	TRUE	mature_mRNA_like
Ctrl_SERIPH1st_1	Ctrl_Conv1st	ENSG00000213190.5	MLLT11	chr1	151057870	151069544	+	11674	3813	7827	4	15.893	0	0.578383	0.108662	0.0349025	4.5592	1.14784	-0.147844	44	219	0.200822	2.53535	TRUE	mature_mRNA_like
Ctrl_SERIPH1st_1	Ctrl_Conv1st	ENSG00000143458.13	GABPB2	chr1	151070513	151125542	+	55029	10170	44859	11	10.6524	12.0259	1.17423	0.984721	0.0984548	3.07696	0.876481	0.123519	112	544	0.205845	0.774684	TRUE	mature_mRNA_like
Ctrl_SERIPH1st_1	Ctrl_Conv1st	ENSG00000143434.18	SEMA6C	chr1	151131684	151147813	-	16129	7368	8761	18	8.13722	10.1959	0.911996	0.792844	0.0996803	3.02495	0.762413	0.237587	78	228	0.341955	0.728446	TRUE	mature_mRNA_like
Ctrl_SERIPH1st_1	Ctrl_Conv1st	ENSG00000163154.7	TNFAIP8L2	chr1	151156620	151160255	+	3635	1715	1920	1	0	0	0	0	0	0			3	3	0.967742	0	FALSE	low_coverage
Ctrl_SERIPH1st_1	Ctrl_Conv1st	ENSG00000163156.13	SCNM1	chr1	151156663	151170296	+	13633	3266	10269	4	34.8166	27.8166	0.546597	5.21404	0.0154131	5.7549	0.717752	0.282248	294	403	0.729348	8.13124	TRUE	mature_mRNA_like
Ctrl_SERIPH1st_1	Ctrl_Conv1st	ENSG00000163155.12	LYSMD1	chr1	151159747	151165948	-	6201	2508	3693	2	36.2927	38.3205	2.13945	1.32656	0.0555239	4.02243	0.929901	0.0700986	36	334	0.107752	1.07073	TRUE	mature_mRNA_like
Ctrl_SERIPH1st_1	Ctrl_Conv1st	ENSG00000163157.16	TMOD4	chr1	151169983	151176284	-	6301	2289	3920	8	2.92966	1.04167	1.38342	0.898332	0.313481	1.03023	1.2932	-0.293202	0	41	0	-2.21549	TRUE	unclassified
Ctrl_SERIPH1st_1	Ctrl_Conv1st	ENSG00000163159.16	VPS72	chr1	151176303	151195321	-	19018	1859	17159	6	205.646	175.454	1.46308	1.42899	0.00706089	7.04033	1.08977	-0.0897706	565	1360	0.415411	3.86116	TRUE	mature_mRNA_like
Ctrl_SERIPH1st_1	Ctrl_Conv1st	ENSG00000143398.21	PIP5K1A	chr1	151197948	151249538	+	51590	5468	46031	19	160.958	183.56	5.95103	3.80047	0.035633	4.73426	0.702878	0.297122	1448	3855	0.375606	1.56817	TRUE	mature_mRNA_like
Ctrl_SERIPH1st_1	Ctrl_Conv1st	ENSG00000159352.17	PSMD4	chr1	151254708	151267479	+	12771	3096	9586	8	134.873	131.496	6.65523	5.77294	0.0469908	4.32052	0.747992	0.252008	1211	1611	0.75166	3.39156	TRUE	mature_mRNA_like
Ctrl_SERIPH1st_1	Ctrl_Conv1st	ENSG00000232671.9	ZNF687-AS1	chr1	151273344	151282013	-	8669	1926	6743	3	2.70976	2.50279	0.726976	0.688779	0.20555	1.76453	0.693946	0.306054	4	36	0.110803	-2.63055	TRUE	partially_spliced
Ctrl_SERIPH1st_1	Ctrl_Conv1st	ENSG00000143373.19	ZNF687	chr1	151281501	151292180	+	10679	6963	3716	10	55.4008	44.356	5.40097	3.52479	0.0886832	3.33475	0.643487	0.356513	290	1355	0.214006	2.36975	TRUE	mature_mRNA_like
Ctrl_SERIPH1st_1	Ctrl_Conv1st	ENSG00000143393.18	PI4KB	chr1	151291791	151328394	-	36603	6829	29710	14	91.3759	70.165	4.66819	3.19856	0.0485541	4.26188	1.19102	-0.191016	743	2543	0.292163	1.34902	TRUE	mature_mRNA_like
Ctrl_SERIPH1st_1	Ctrl_Conv1st	ENSG00000237976.3	RFX5-AS1	chr1	151327810	151348027	+	20217	1622	18595	3	2.00493	2.36793	0.0672763	0.054827	0.0309714	3.65347	0.960771	0.0392295	8	15	0.529801	1.79555	TRUE	mature_mRNA_like
Ctrl_SERIPH1st_1	Ctrl_Conv1st	ENSG00000143390.19	RFX5	chr1	151340639	151347339	-	6700	4933	1556	6	88.7456	93.0223	6.37275	4.67733	0.0669278	3.77885	0.960128	0.0398716	385	1494	0.25768	2.01982	TRUE	mature_mRNA_like
Ctrl_SERIPH1st_1	Ctrl_Conv1st	ENSG00000143416.22	SELENBP1	chr1	151364301	151372716	-	8415	3574	4750	8	12.4969	12.038	0.883789	0.415138	0.0655595	3.67858	0.940625	0.0593751	96	164	0.585009	3.37351	TRUE	mature_mRNA_like
Ctrl_SERIPH1st_1	Ctrl_Conv1st	ENSG00000159377.12	PSMB4	chr1	151399555	151401941	+	2386	2133	253	1	351.603	405.586	5.12648	5.12648	0.0143667	6.07238			2236	2501	0.894007	0.127657	TRUE	mature_mRNA_like
Ctrl_SERIPH1st_1	Ctrl_Conv1st	ENSG00000143442.24	POGZ	chr1	151402723	151459494	-	56771	12192	44480	19	78.755	100.059	5.85085	4.74542	0.0690726	3.72803	0.839073	0.160927	1382	4077	0.338966	1.57273	TRUE	mature_mRNA_like
Ctrl_SERIPH1st_1	Ctrl_Conv1st	ENSG00000143375.16	CGN	chr1	151510138	151538692	+	28554	7113	21342	22	7.03543	4.11429	0.617655	0.330597	0.0796658	3.31364	0.959199	0.0408007	66	212	0.311174	2.27272	TRUE	mature_mRNA_like
Ctrl_SERIPH1st_1	Ctrl_Conv1st	ENSG00000143367.18	TUFT1	chr1	151540304	151583583	+	43279	3899	39380	12	18.5486	19.4264	1.6322	0.817278	0.08048	3.42839	0.768629	0.231371	126	457	0.275651	1.08548	TRUE	mature_mRNA_like
Ctrl_SERIPH1st_1	Ctrl_Conv1st	ENSG00000143376.15	SNX27	chr1	151612005	151699091	+	87086	16711	70375	14	36.0494	12.6251	1.55471	1.06387	0.0412346	4.44932	1.17262	-0.17262	409	2380	0.171842	2.83045	TRUE	mature_mRNA_like
Ctrl_SERIPH1st_1	Ctrl_Conv1st	ENSG00000159409.15	CELF3	chr1	151700057	151716803	-	16746	6774	9972	11	0.0444344	0	0	0	0	0.530415	0	1	2	3	0.645161	0.677173	FALSE	low_coverage
Ctrl_SERIPH1st_1	Ctrl_Conv1st	ENSG00000178796.13	RIIAD1	chr1	151710432	151729805	+	19373	2276	17097	11	0	0	0	0	0	0	0	1	2	2	0.952381	0	FALSE	low_coverage
Ctrl_SERIPH1st_1	Ctrl_Conv1st	ENSG00000143436.11	MRPL9	chr1	151759646	151763496	-	3850	1740	2031	6	157.48	156.067	5.62875	3.29651	0.034488	4.78172	0.759615	0.240385	387	956	0.404769	0.724409	TRUE	mature_mRNA_like
Ctrl_SERIPH1st_1	Ctrl_Conv1st	ENSG00000143450.19	OAZ3	chr1	151762898	151771334	+	8436	4633	3791	5	0.977336	0.795539	0	0	0	3.4294	0	1	8	17	0.467836	-0.983106	FALSE	low_coverage
Ctrl_SERIPH1st_1	Ctrl_Conv1st	ENSG00000182134.18	TDRKH	chr1	151769798	151791416	-	21618	6222	15123	17	12.4221	12.7884	1.06804	0.253782	0.0785898	3.42231	1.17613	-0.176126	152	323	0.470443	3.20016	TRUE	mature_mRNA_like
Ctrl_SERIPH1st_1	Ctrl_Conv1st	ENSG00000203288.7	TDRKH-AS1	chr1	151790708	151794403	+	3695	1675	2020	2	2.19343	1.89813	0.416832	0.738555	0.153798	2.14974	0.74807	0.25193	3	17	0.175439	-0.410513	TRUE	partially_spliced
Ctrl_SERIPH1st_1	Ctrl_Conv1st	ENSG00000213171.3	LINGO4	chr1	151800263	151805419	-	5156	2644	2512	1	0	0	0	0	0	0			0	0	0	0	FALSE	low_coverage
Ctrl_SERIPH1st_1	Ctrl_Conv1st	ENSG00000143365.21	RORC	chr1	151806070	151831845	-	25775	6517	19258	8	0	0	0	0	0	0	0	1	0	0	0	0	FALSE	low_coverage
Ctrl_SERIPH1st_1	Ctrl_Conv1st	ENSG00000225556.3	C2CD4D	chr1	151837817	151840557	-	2740	2177	525	2	0	0	0	0	0	0	0	1	0	0	0	0	FALSE	low_coverage
Ctrl_SERIPH1st_1	Ctrl_Conv1st	ENSG00000234614.2	C2CD4D-AS1	chr1	151841876	151851549	+	9673	1670	8003	2	0	0	0	0	0	0	0	1	2	2	0.952381	0	FALSE	low_coverage
Ctrl_SERIPH1st_1	Ctrl_Conv1st	ENSG00000196407.12	THEM5	chr1	151847100	151853712	-	6612	1161	5451	5	0	0	0	0	0	0	0	1	0	0	0	0	FALSE	low_coverage
Ctrl_SERIPH1st_1	Ctrl_Conv1st	ENSG00000159445.14	THEM4	chr1	151870865	151909637	-	38772	6937	31835	6	15.5035	17.6923	2.51503	2.01236	0.13881	2.57697	0.973462	0.0265382	83	627	0.132355	0.978238	TRUE	mature_mRNA_like
Ctrl_SERIPH1st_1	Ctrl_Conv1st	ENSG00000197747.10	S100A10	chr1	151982902	151993859	-	10957	1754	9203	5	240.405	47.2295	5.53363	5.40824	0.0224909	5.41586	0.26903	0.73097	579	1588	0.364587	2.8323	TRUE	mature_mRNA_like
Ctrl_SERIPH1st_1	Ctrl_Conv1st	ENSG00000163191.7	S100A11	chr1	152032503	152047907	-	15404	678	14726	3	275.993	221.336	1.01752	3.6009	0.0036719	7.94871	0.680874	0.319126	173	673	0.25702	8.77404	TRUE	mature_mRNA_like
Ctrl_SERIPH1st_1	Ctrl_Conv1st	ENSG00000182898.4	TCHHL1	chr1	152084140	152089064	-	4924	3606	1318	2	0	0	0	0	0	0	0	1	0	0	0	0	FALSE	low_coverage
Ctrl_SERIPH1st_1	Ctrl_Conv1st	ENSG00000159450.13	TCHH	chr1	152106316	152115444	-	9128	6985	2143	2	0.129706	0	0	0	0	1.19979	0	1	0	3	0	1.68041	FALSE	low_coverage
Ctrl_SERIPH1st_1	Ctrl_Conv1st	ENSG00000215853.3	RPTN	chr1	152153594	152159228	-	5634	3569	2065	2	0	0	0	0	0	0	0	1	0	0	0	0	FALSE	low_coverage
Ctrl_SERIPH1st_1	Ctrl_Conv1st	ENSG00000236427.3	CCDST	chr1	152165552	152445456	+	279904	18687	261123	24	2.29759	0.66213	0.619647	0.318669	0.205369	1.73622	1.39642	-0.39642	14	685	0.020435	-2.00122	TRUE	unclassified
Ctrl_SERIPH1st_1	Ctrl_Conv1st	ENSG00000197915.7	HRNR	chr1	152212075	152224193	-	12118	9629	2489	2	0	0	0	0	0	0	0	1	0	0	0	0	FALSE	low_coverage
Ctrl_SERIPH1st_1	Ctrl_Conv1st	ENSG00000143631.11	FLG	chr1	152302164	152325239	-	23075	12793	10282	2	0.0708201	0	0	0	0	0.772477	0	1	0	3	0	1.20695	FALSE	low_coverage
Ctrl_SERIPH1st_1	Ctrl_Conv1st	ENSG00000143520.6	FLG2	chr1	152348734	152360006	-	11272	9124	2148	2	0	0	0	0	0	0	0	1	0	0	0	0	FALSE	low_coverage
Ctrl_SERIPH1st_1	Ctrl_Conv1st	ENSG00000143536.7	CRNN	chr1	152409242	152414263	-	5021	1902	3119	2	0	0	0	0	0	0	0	1	0	0	0	0	FALSE	low_coverage
Ctrl_SERIPH1st_1	Ctrl_Conv1st	ENSG00000186207.5	LCE5A	chr1	152510802	152512177	+	1375	860	515	1	0	0	0	0	0	0			0	0	0	0	FALSE	low_coverage
Ctrl_SERIPH1st_1	Ctrl_Conv1st	ENSG00000169509.6	CRCT1	chr1	152514481	152516008	+	1527	718	809	1	0	0	0	0	0	0			0	0	0	0	FALSE	low_coverage
Ctrl_SERIPH1st_1	Ctrl_Conv1st	ENSG00000185966.4	LCE3E	chr1	152565653	152566780	-	1127	619	508	1	0	0	0	0	0	0			0	0	0	0	FALSE	low_coverage
Ctrl_SERIPH1st_1	Ctrl_Conv1st	ENSG00000163202.5	LCE3D	chr1	152579380	152580516	-	1136	625	511	1	0	0	0	0	0	0			0	0	0	0	FALSE	low_coverage
Ctrl_SERIPH1st_1	Ctrl_Conv1st	ENSG00000244057.5	LCE3C	chr1	152600233	152601086	+	853	476	377	1	0	0	0	0	0	0			0	0	0	0	FALSE	low_coverage
Ctrl_SERIPH1st_1	Ctrl_Conv1st	ENSG00000187238.5	LCE3B	chr1	152613810	152614098	+	288	288			0	0							0	0	0	0	FALSE	low_coverage
Ctrl_SERIPH1st_1	Ctrl_Conv1st	ENSG00000185962.1	LCE3A	chr1	152622833	152623103	-	270	270			0	0							0	0	0	0	FALSE	low_coverage
Ctrl_SERIPH1st_1	Ctrl_Conv1st	ENSG00000187223.4	LCE2D	chr1	152663379	152664659	+	1280	625	655	1	0	0	0	0	0	0			0	0	0	0	FALSE	low_coverage
Ctrl_SERIPH1st_1	Ctrl_Conv1st	ENSG00000187180.4	LCE2C	chr1	152675278	152676569	+	1291	625	666	1	0	0	0	0	0	0			0	0	0	0	FALSE	low_coverage
Ctrl_SERIPH1st_1	Ctrl_Conv1st	ENSG00000159455.9	LCE2B	chr1	152686122	152687397	+	1275	608	667	1	0	0	0	0	0	0			0	0	0	0	FALSE	low_coverage
Ctrl_SERIPH1st_1	Ctrl_Conv1st	ENSG00000187173.4	LCE2A	chr1	152698344	152699442	+	1098	611	487	1	0	0	0	0	0	0			0	0	0	0	FALSE	low_coverage
Ctrl_SERIPH1st_1	Ctrl_Conv1st	ENSG00000187170.6	LCE4A	chr1	152708159	152709434	+	1275	615	660	1	0	0	0	0	0	0			0	0	0	0	FALSE	low_coverage
Ctrl_SERIPH1st_1	Ctrl_Conv1st	ENSG00000198854.5	KPLCE	chr1	152719521	152720470	+	949	949			0	0							0	0	0	0	FALSE	low_coverage
Ctrl_SERIPH1st_1	Ctrl_Conv1st	ENSG00000203786.7	KPRP	chr1	152758024	152762056	+	4032	2531	1501	1	0	0	0	0	0	0			0	0	0	0	FALSE	low_coverage
Ctrl_SERIPH1st_1	Ctrl_Conv1st	ENSG00000240386.4	LCE1F	chr1	152775139	152777024	+	1885	726	1159	1	0	0	0	0	0	0			0	0	0	0	FALSE	low_coverage
Ctrl_SERIPH1st_1	Ctrl_Conv1st	ENSG00000186226.9	LCE1E	chr1	152786213	152788426	+	2213	1299	914	1	0	0	0	0	0	0			0	0	0	0	FALSE	low_coverage
Ctrl_SERIPH1st_1	Ctrl_Conv1st	ENSG00000172155.10	LCE1D	chr1	152796720	152798181	+	1461	460	1001	1	0	0	0	0	0	0			0	0	0	0	FALSE	low_coverage
Ctrl_SERIPH1st_1	Ctrl_Conv1st	ENSG00000197084.6	LCE1C	chr1	152804831	152806651	-	1820	718	1102	1	0	0	0	0	0	0			0	0	0	0	FALSE	low_coverage
Ctrl_SERIPH1st_1	Ctrl_Conv1st	ENSG00000196734.9	LCE1B	chr1	152811970	152813108	+	1138	1138			0	0							0	0	0	0	FALSE	low_coverage
Ctrl_SERIPH1st_1	Ctrl_Conv1st	ENSG00000186844.6	LCE1A	chr1	152827472	152828097	+	625	625			0	0							0	0	0	0	FALSE	low_coverage
Ctrl_SERIPH1st_1	Ctrl_Conv1st	ENSG00000235942.3	LCE6A	chr1	152842855	152843983	+	1128	640	488	1	0	0	0	0	0	0			0	0	0	0	FALSE	low_coverage
Ctrl_SERIPH1st_1	Ctrl_Conv1st	ENSG00000285946.2	LCE7A	chr1	152859995	152861252	+	1257	612	645	1	0	0	0	0	0	0			0	0	0	0	FALSE	low_coverage
Ctrl_SERIPH1st_1	Ctrl_Conv1st	ENSG00000163206.6	SMCP	chr1	152878321	152885047	+	6726	770	5956	1	0	0	0	0	0	0			0	0	0	0	FALSE	low_coverage
Ctrl_SERIPH1st_1	Ctrl_Conv1st	ENSG00000163207.7	IVL	chr1	152908545	152911886	+	3341	2152	1189	1	0	0	0	0	0	0			0	0	0	0	FALSE	low_coverage
Ctrl_SERIPH1st_1	Ctrl_Conv1st	ENSG00000283227.2	SPRR5	chr1	152947205	152949255	+	2050	762	1288	1	0	0	0	0	0	0			0	0	0	0	FALSE	low_coverage
Ctrl_SERIPH1st_1	Ctrl_Conv1st	ENSG00000184148.4	SPRR4	chr1	152970647	152972574	+	1927	751	1176	1	0	0	0	0	0	0			0	0	0	0	FALSE	low_coverage
Ctrl_SERIPH1st_1	Ctrl_Conv1st	ENSG00000169474.5	SPRR1A	chr1	152984080	152985814	+	1734	662	1072	1	0	0	0	0	0	0			0	0	0	0	FALSE	low_coverage
Ctrl_SERIPH1st_1	Ctrl_Conv1st	ENSG00000163209.15	SPRR3	chr1	153001746	153003856	+	2110	1441	669	3	0	0	0	0	0	0	0	1	0	0	0	0	FALSE	low_coverage
Ctrl_SERIPH1st_1	Ctrl_Conv1st	ENSG00000169469.9	SPRR1B	chr1	153031202	153032900	+	1698	619	1079	1	0	0	0	0	0	0			0	0	0	0	FALSE	low_coverage
Ctrl_SERIPH1st_1	Ctrl_Conv1st	ENSG00000163216.7	SPRR2D	chr1	153039731	153041931	-	2200	1052	1148	3	0	0	0	0	0	0	0	1	0	0	0	0	FALSE	low_coverage
Ctrl_SERIPH1st_1	Ctrl_Conv1st	ENSG00000241794.2	SPRR2A	chr1	153056119	153057512	-	1393	677	716	1	0	0	0	0	0	0			0	0	0	0	FALSE	low_coverage
Ctrl_SERIPH1st_1	Ctrl_Conv1st	ENSG00000196805.8	SPRR2B	chr1	153070225	153071611	-	1386	676	710	1	0	0	0	0	0	0			0	0	0	0	FALSE	low_coverage
Ctrl_SERIPH1st_1	Ctrl_Conv1st	ENSG00000203785.9	SPRR2E	chr1	153093134	153106184	-	13050	735	12315	2	0	0	0	0	0	0	0	1	0	0	0	0	FALSE	low_coverage
Ctrl_SERIPH1st_1	Ctrl_Conv1st	ENSG00000244094.2	SPRR2F	chr1	153112120	153113516	-	1396	675	721	1	0	0	0	0	0	0			0	0	0	0	FALSE	low_coverage
Ctrl_SERIPH1st_1	Ctrl_Conv1st	ENSG00000159516.9	SPRR2G	chr1	153149581	153150890	-	1309	589	720	1	0	0	0	0	0	0			0	0	0	0	FALSE	low_coverage
Ctrl_SERIPH1st_1	Ctrl_Conv1st	ENSG00000203784.3	LELP1	chr1	153203429	153205120	+	1691	536	1155	1	0	0	0	0	0	0			0	0	0	0	FALSE	low_coverage
Ctrl_SERIPH1st_1	Ctrl_Conv1st	ENSG00000203783.5	PRR9	chr1	153217583	153219310	+	1727	1222	505	1	0	0	0	0	0	0			0	0	0	0	FALSE	low_coverage
Ctrl_SERIPH1st_1	Ctrl_Conv1st	ENSG00000203782.6	LORICRIN	chr1	153259686	153262124	+	2438	1245	1193	1	0	0	0	0	0	0			0	0	0	0	FALSE	low_coverage
Ctrl_SERIPH1st_1	Ctrl_Conv1st	ENSG00000159527.4	PGLYRP3	chr1	153297115	153312952	-	15837	2229	13608	7	0	0	0	0	0	0	0	1	0	0	0	0	FALSE	low_coverage
Ctrl_SERIPH1st_1	Ctrl_Conv1st	ENSG00000163218.15	PGLYRP4	chr1	153330119	153348841	-	18722	2273	16449	8	0	0	0	0	0	0	0	1	0	0	0	0	FALSE	low_coverage
Ctrl_SERIPH1st_1	Ctrl_Conv1st	ENSG00000163220.12	S100A9	chr1	153357766	153361027	+	3261	744	2517	2	0	0	0	0	0	0	0	1	0	0	0	0	FALSE	low_coverage
Ctrl_SERIPH1st_1	Ctrl_Conv1st	ENSG00000163221.9	S100A12	chr1	153373710	153375621	-	1911	485	1426	2	0	0	0	0	0	0	0	1	0	0	0	0	FALSE	low_coverage
Ctrl_SERIPH1st_1	Ctrl_Conv1st	ENSG00000143546.11	S100A8	chr1	153390031	153391142	-	1111	960	151	1	0	0	0	0	0	0			0	0	0	0	FALSE	low_coverage
Ctrl_SERIPH1st_1	Ctrl_Conv1st	ENSG00000184330.12	S100A7A	chr1	153416519	153423222	+	6703	4458	2245	3	0	0	0	0	0	0	0	1	0	0	0	0	FALSE	low_coverage
Ctrl_SERIPH1st_1	Ctrl_Conv1st	ENSG00000143556.10	S100A7	chr1	153457743	153460651	-	2908	1087	1821	3	0	0	0	0	0	0	0	1	0	0	0	0	FALSE	low_coverage
Ctrl_SERIPH1st_1	Ctrl_Conv1st	ENSG00000197956.11	S100A6	chr1	153534590	153536549	-	1959	1697	262	1	0	0	0	0	0	0			0	0	0	0	FALSE	low_coverage
Ctrl_SERIPH1st_1	Ctrl_Conv1st	ENSG00000196420.9	S100A5	chr1	153537146	153541765	-	4619	1064	3555	4	0	0	0.0849505	0	0.459315	-0.88714	0.38781	0.61219	0	1	0	1.66854	FALSE	low_coverage
Ctrl_SERIPH1st_1	Ctrl_Conv1st	ENSG00000196154.13	S100A4	chr1	153543612	153550136	-	6524	1346	5130	3	2.22214	0	0	0	0	4.53738	0	1	2	10	0.19802	4.02589	TRUE	mature_mRNA_like
Ctrl_SERIPH1st_1	Ctrl_Conv1st	ENSG00000188015.11	S100A3	chr1	153547328	153550151	-	2823	1604	1123	2	0	0	0	0	0	0	0	1	0	0	0	0	FALSE	low_coverage
Ctrl_SERIPH1st_1	Ctrl_Conv1st	ENSG00000196754.14	S100A2	chr1	153560949	153568674	-	7725	3337	4388	6	0.687744	0.227586	0.427302	0.430895	0.351676	0.579098	0.993855	0.00614468	1	14	0.070922	-1.96225	TRUE	unclassified
Ctrl_SERIPH1st_1	Ctrl_Conv1st	ENSG00000188643.12	S100A16	chr1	153606881	153614012	-	7131	2996	4019	7	0.293057	0	0	0	0	1.97474	0	1	0	3	0	2.35183	FALSE	low_coverage
Ctrl_SERIPH1st_1	Ctrl_Conv1st	ENSG00000189334.10	S100A14	chr1	153614254	153616996	-	2742	1324	1413	4	0.141239	0	0.0813872	0.0306605	0.252265	0.411389	0.541694	0.458306	0	1	0	0	FALSE	low_coverage
Ctrl_SERIPH1st_1	Ctrl_Conv1st	ENSG00000189171.17	S100A13	chr1	153618611	153634442	-	15831	7234	8597	3	12.4941	12.813	2.14063	1.66483	0.145278	2.49077	0.935273	0.0647268	133	364	0.365284	-0.452145	TRUE	mature_mRNA_like
Ctrl_SERIPH1st_1	Ctrl_Conv1st	ENSG00000160678.13	S100A1	chr1	153627925	153632044	+	4119	3073	1046	2	0.196551	0.143289	0	0	0	1.56828	0	1	2	2	0.952381	0.430192	FALSE	low_coverage
Ctrl_SERIPH1st_1	Ctrl_Conv1st	ENSG00000160679.14	CHTOP	chr1	153633981	153646306	+	12325	6100	6225	3	99.7816	117.129	24.1112	26.1576	0.194456	2.04455	0.592597	0.407403	570	2538	0.224577	1.0031	TRUE	partially_spliced
Ctrl_SERIPH1st_1	Ctrl_Conv1st	ENSG00000143553.12	SNAPIN	chr1	153658695	153663930	+	5235	1937	3298	2	64.5648	49.7635	3.4527	3.45833	0.0506874	4.18599	0.163068	0.836932	190	455	0.417491	-3.35498	TRUE	mature_mRNA_like
Ctrl_SERIPH1st_1	Ctrl_Conv1st	ENSG00000143621.18	ILF2	chr1	153661787	153671028	-	9241	2346	6895	12	732.204	1004.22	5.98216	6.64606	0.00810277	6.91171	0.402308	0.597692	4837	5863	0.82499	1.07646	TRUE	mature_mRNA_like
Ctrl_SERIPH1st_1	Ctrl_Conv1st	ENSG00000169418.11	NPR1	chr1	153677964	153694110	+	16146	5851	10123	22	3.24885	3.93382	0.269782	0	0.0745536	3.17892	1.10072	-0.100724	49	73	0.670315	0.172217	TRUE	mature_mRNA_like
Ctrl_SERIPH1st_1	Ctrl_Conv1st	ENSG00000143624.15	INTS3	chr1	153728049	153774808	+	46759	10467	36232	24	68.5499	131.98	3.435	3.29987	0.0476522	4.27947	0.603276	0.396724	1517	2809	0.540031	1.46599	TRUE	mature_mRNA_like
Ctrl_SERIPH1st_1	Ctrl_Conv1st	ENSG00000143554.15	SLC27A3	chr1	153774353	153780158	+	5805	5471	334	1	9.13891	9.16341	2.22156	2.22156	0.193845	1.99263			69	170	0.405644	0.309789	TRUE	partially_spliced
Ctrl_SERIPH1st_1	Ctrl_Conv1st	ENSG00000143614.12	GATAD2B	chr1	153789029	153923360	-	134331	9624	124707	21	91.7643	42.225	2.54856	2.92468	0.0269937	5.11623	0.855266	0.144734	673	4030	0.166993	2.59442	TRUE	mature_mRNA_like
Ctrl_SERIPH1st_1	Ctrl_Conv1st	ENSG00000198837.11	DENND4B	chr1	153928863	153946744	-	17881	8391	9214	17	57.0044	51.4506	5.43043	4.63018	0.0868385	3.36814	0.684694	0.315306	906	1767	0.512704	0.624449	TRUE	mature_mRNA_like
Ctrl_SERIPH1st_1	Ctrl_Conv1st	ENSG00000160741.18	CRTC2	chr1	153947668	153958634	-	10966	3656	7214	11	56.8301	54.4001	4.95301	3.9403	0.0800381	3.49398	0.827846	0.172154	424	815	0.520182	1.72849	TRUE	mature_mRNA_like
Ctrl_SERIPH1st_1	Ctrl_Conv1st	ENSG00000143570.20	SLC39A1	chr1	153959098	153968667	-	9569	4416	5117	6	102.557	3.13429	2.05237	0.895651	0.0196007	5.57576	0.949273	0.0507269	178	1546	0.115128	6.18896	TRUE	mature_mRNA_like
Ctrl_SERIPH1st_1	Ctrl_Conv1st	ENSG00000143578.17	CREB3L4	chr1	153963718	153974364	+	10646	3915	6731	7	9.67918	11.3556	2.09493	4.21053	0.176429	2.15554	0.587435	0.412565	38	174	0.218265	1.62128	TRUE	partially_spliced
Ctrl_SERIPH1st_1	Ctrl_Conv1st	ENSG00000143543.16	JTB	chr1	153974268	153977674	-	3406	1482	1924	3	276.382	289.846	10.9657	16.6987	0.0381485	4.64302	0.409355	0.590645	618	1438	0.429734	-0.90015	TRUE	mature_mRNA_like
Ctrl_SERIPH1st_1	Ctrl_Conv1st	ENSG00000272654.3	JTB-DT	chr1	153977682	153979160	+	1478	1478			8.37821	8.37821							0	45	0	-1.85569	TRUE	unclassified
Ctrl_SERIPH1st_1	Ctrl_Conv1st	ENSG00000143545.11	RAB13	chr1	153981616	153986377	-	4761	2770	1991	3	26.774	40.7939	0.978905	0.798946	0.0351455	4.63857	0.725774	0.274226	208	257	0.809024	0.185495	TRUE	mature_mRNA_like
Ctrl_SERIPH1st_1	Ctrl_Conv1st	ENSG00000177954.15	RPS27	chr1	153990748	153992333	+	1585	1219	366	1	259.062	188.175	5.80328	5.80328	0.021902	5.4562			965	1063	0.907723	-3.32299	TRUE	mature_mRNA_like
Ctrl_SERIPH1st_1	Ctrl_Conv1st	ENSG00000143552.10	NUP210L	chr1	153992689	154155116	-	162427	5884	156376	37	0.112169	0	0.0346857	0	0.140511	0.655615	0.387593	0.612407	4	22	0.180995	-0.51067	FALSE	low_coverage
Ctrl_SERIPH1st_1	Ctrl_Conv1st	ENSG00000143549.23	TPM3	chr1	154155307	154194648	-	39341	15205	24102	16	50.5441	6.19562	3.45179	2.808	0.0638087	3.83378	1.09399	-0.0939851	425	2843	0.149485	4.42351	TRUE	mature_mRNA_like
Ctrl_SERIPH1st_1	Ctrl_Conv1st	ENSG00000163263.7	CFAP141	chr1	154199084	154206333	-	7249	674	6575	3	0.566765	1.00385	0.283802	0.487097	0.298561	0.796817	0.256246	0.743754	0	8	0	0.781741	FALSE	low_coverage
Ctrl_SERIPH1st_1	Ctrl_Conv1st	ENSG00000143612.22	C1orf43	chr1	154206667	154220681	-	14014	2742	11193	8	228.61	229.476	8.24256	7.39875	0.0347857	4.77688	0.8201	0.1799	878	2400	0.365818	1.05324	TRUE	mature_mRNA_like
Ctrl_SERIPH1st_1	Ctrl_Conv1st	ENSG00000143569.21	UBAP2L	chr1	154220178	154271510	+	51332	8081	43155	28	243.667	229.965	9.00769	7.00421	0.0356352	4.74228	0.738717	0.261283	5018	7881	0.636713	1.60553	TRUE	mature_mRNA_like
Ctrl_SERIPH1st_1	Ctrl_Conv1st	ENSG00000143575.17	HAX1	chr1	154269392	154275882	+	6490	3559	2913	1	89.8013	42.55	28.1411	28.1411	0.238398	1.67055			909	1391	0.65344	1.02774	TRUE	partially_spliced
Ctrl_SERIPH1st_1	Ctrl_Conv1st	ENSG00000143595.14	AQP10	chr1	154321089	154325325	+	4236	2295	1941	4	0.320261	0	0	0	0	2.07129	0	1	5	5	0.980392	0	FALSE	low_coverage
Ctrl_SERIPH1st_1	Ctrl_Conv1st	ENSG00000143515.21	ATP8B2	chr1	154325519	154351307	+	25788	7773	17876	29	85.785	96.3115	2.78334	1.94182	0.0313905	4.89659	0.893661	0.106339	1168	2390	0.488682	2.28337	TRUE	mature_mRNA_like
Ctrl_SERIPH1st_1	Ctrl_Conv1st	ENSG00000228013.2	IL6R-AS1	chr1	154402327	154406564	-	4237	1886	2351	2	0	0	0	0	0	0	0	1	0	0	0	0	FALSE	low_coverage
Ctrl_SERIPH1st_1	Ctrl_Conv1st	ENSG00000160712.14	IL6R	chr1	154405192	154469450	+	64258	7209	57049	13	3.57054	3.45703	0.135024	0.089033	0.0354808	3.96511	0.46164	0.53836	31	112	0.276539	2.12583	TRUE	mature_mRNA_like
Ctrl_SERIPH1st_1	Ctrl_Conv1st	ENSG00000169291.11	SHE	chr1	154469771	154502472	-	32701	8800	23901	5	0	0	0	0	0	0	0	1	0	0	0	0	FALSE	low_coverage
Ctrl_SERIPH1st_1	Ctrl_Conv1st	ENSG00000163239.13	TDRD10	chr1	154502218	154548147	+	45929	2781	43148	13	0	0	0	0	0	0	0	1	0	0	0	0	FALSE	low_coverage
Ctrl_SERIPH1st_1	Ctrl_Conv1st	ENSG00000160714.12	UBE2Q1	chr1	154548549	154559028	-	10479	4275	6135	9	88.0087	103.162	5.47726	2.81008	0.0585266	3.98165	0.752833	0.247167	676	1368	0.494116	2.01431	TRUE	mature_mRNA_like
Ctrl_SERIPH1st_1	Ctrl_Conv1st	ENSG00000229780.2	UBE2Q1-AS1	chr1	154553608	154555028	+	1420	443	977	1	0	0	0	0	0	0			0	0	0	0	FALSE	low_coverage
Ctrl_SERIPH1st_1	Ctrl_Conv1st	ENSG00000160716.6	CHRNB2	chr1	154567777	154580013	+	12236	5882	6354	5	0.101326	0	0	0	0	1.00953	0	1	0	2	0	0	FALSE	low_coverage
Ctrl_SERIPH1st_1	Ctrl_Conv1st	ENSG00000160710.20	ADAR	chr1	154581694	154628013	-	46319	12864	33455	17	149.949	121.006	3.4894	2.89764	0.0227266	5.38555	0.810503	0.189497	1937	6830	0.283598	4.66874	TRUE	mature_mRNA_like
Ctrl_SERIPH1st_1	Ctrl_Conv1st	ENSG00000143603.20	KCNN3	chr1	154697454	154870281	-	172827	13599	159228	10	0.0852267	0	0.0388498	0.042927	0.173377	0.415768	0.269408	0.730592	2	26	0.0766284	0.2582	FALSE	low_coverage
Ctrl_SERIPH1st_1	Ctrl_Conv1st	ENSG00000163344.7	PMVK	chr1	154924731	154937008	-	12277	1536	10741	6	22.5723	20.6236	1.54408	1.41292	0.063762	3.78557	0.510012	0.489988	76	174	0.436531	0.393637	TRUE	mature_mRNA_like
Ctrl_SERIPH1st_1	Ctrl_Conv1st	ENSG00000163346.18	PBXIP1	chr1	154944058	154956451	-	12393	4531	7672	10	8.0448	4.42677	0.650547	0.626968	0.0739649	3.43986	0.8708	0.1292	37	141	0.262225	2.79687	TRUE	mature_mRNA_like
Ctrl_SERIPH1st_1	Ctrl_Conv1st	ENSG00000163348.4	PYGO2	chr1	154957025	154963853	-	6828	3664	3164	4	97.3272	74.6084	21.7769	6.61406	0.182686	2.15492	1.17504	-0.175044	89	1457	0.0610802	1.30868	TRUE	unclassified
Ctrl_SERIPH1st_1	Ctrl_Conv1st	ENSG00000271380.1	PYGO2-AS1	chr1	154961824	154962623	+	799	799			15.2015	15.2015							0	53	0	1.11993	TRUE	unclassified
Ctrl_SERIPH1st_1	Ctrl_Conv1st	ENSG00000160691.20	SHC1	chr1	154962283	154974395	-	12112	4407	7537	11	38.0919	48.6703	2.54743	2.18228	0.0625301	3.8506	0.756972	0.243028	223	628	0.355039	2.76806	TRUE	mature_mRNA_like
Ctrl_SERIPH1st_1	Ctrl_Conv1st	ENSG00000173207.14	CKS1B	chr1	154974640	154979251	+	4611	2457	2073	3	83.1237	28.3591	10.0314	10.1014	0.107569	3.03817	0.231321	0.768679	448	754	0.594086	2.20821	TRUE	mature_mRNA_like
Ctrl_SERIPH1st_1	Ctrl_Conv1st	ENSG00000160688.20	FLAD1	chr1	154983337	154993111	+	9774	4019	5755	4	58.8656	64.845	7.23267	9.10595	0.109258	3.00746	0.2022	0.7978	302	932	0.324	0.186939	TRUE	mature_mRNA_like
Ctrl_SERIPH1st_1	Ctrl_Conv1st	ENSG00000163352.6	LENEP	chr1	154993585	154994315	+	730	730			1.73562	1.73562							1	7	0.140845	-4.70424	TRUE	unclassified
Ctrl_SERIPH1st_1	Ctrl_Conv1st	ENSG00000160685.15	ZBTB7B	chr1	155002542	155018525	+	15983	8539	7333	9	12.7514	4.93424	5.56553	3.37521	0.302197	1.18164	0.623658	0.376342	61	503	0.121248	1.26831	TRUE	partially_spliced
Ctrl_SERIPH1st_1	Ctrl_Conv1st	ENSG00000163354.15	DCST2	chr1	155018519	155033781	-	15262	3071	12096	13	0.513839	0	0.189401	0	0.235797	1.08479	0.882612	0.117388	0	13	0	-1.54783	FALSE	low_coverage
Ctrl_SERIPH1st_1	Ctrl_Conv1st	ENSG00000163357.11	DCST1	chr1	155033823	155050930	+	17107	3193	13736	15	0.241152	0	0	0	0	1.77042	0	1	0	4	0	1.32198	FALSE	low_coverage
Ctrl_SERIPH1st_1	Ctrl_Conv1st	ENSG00000232093.2	DCST1-AS1	chr1	155045190	155051172	-	5982	1518	4464	3	6.89789	7.56973	3.22312	2.14151	0.315342	1.07438	0.526967	0.473033	12	84	0.142687	-0.798539	TRUE	partially_spliced
Ctrl_SERIPH1st_1	Ctrl_Conv1st	ENSG00000143537.15	ADAM15	chr1	155050565	155062780	+	12215	6676	4957	11	33.851	54.9431	2.26609	1.80668	0.0625697	3.84288	0.920429	0.0795712	581	798	0.727979	1.157	TRUE	mature_mRNA_like
Ctrl_SERIPH1st_1	Ctrl_Conv1st	ENSG00000243364.8	EFNA4	chr1	155063736	155069553	+	5817	1257	4560	3	16.4821	12.3855	1.87171	1.78329	0.101427	3.07211	0.604799	0.395201	20	97	0.205973	1.42344	TRUE	mature_mRNA_like
Ctrl_SERIPH1st_1	Ctrl_Conv1st	ENSG00000143590.15	EFNA3	chr1	155078822	155087538	+	8716	1958	6758	5	14.1338	16.4689	0.566736	0.545757	0.0382916	4.41606	0.825892	0.174108	13	106	0.122526	3.05009	TRUE	mature_mRNA_like
Ctrl_SERIPH1st_1	Ctrl_Conv1st	ENSG00000169242.13	EFNA1	chr1	155127875	155134899	+	7024	2165	4859	4	6.97552	7.04762	1.07718	0.882241	0.132125	2.58751	0.609071	0.390929	18	68	0.264317	0.704069	TRUE	mature_mRNA_like
Ctrl_SERIPH1st_1	Ctrl_Conv1st	ENSG00000169241.20	SLC50A1	chr1	155135343	155138857	+	3514	2345	1106	4	29.1514	32.4745	2.65823	2.06894	0.0833049	3.40669	0.80821	0.19179	127	241	0.526752	2.28404	TRUE	mature_mRNA_like
Ctrl_SERIPH1st_1	Ctrl_Conv1st	ENSG00000179085.9	DPM3	chr1	155139885	155140595	-	710	631			124.276	78.3613							0	262	0	5.61576	TRUE	unclassified
Ctrl_SERIPH1st_1	Ctrl_Conv1st	ENSG00000163463.14	KRTCAP2	chr1	155169407	155173475	-	4068	3826	167	1	75.5463	183.575	8.86826	8.86826	0.104932	3.07637			811	973	0.833419	-0.860569	TRUE	mature_mRNA_like
Ctrl_SERIPH1st_1	Ctrl_Conv1st	ENSG00000163462.19	TRIM46	chr1	155173786	155184971	+	11185	4533	6652	14	0.756673	0.59375	0.114251	0	0.117673	1.99944	0.811862	0.188138	4	14	0.283688	0.904688	FALSE	low_coverage
Ctrl_SERIPH1st_1	Ctrl_Conv1st	ENSG00000185499.17	MUC1	chr1	155185823	155192916	-	7093	2401	4513	5	0.38484	0	0.114779	0	0.191421	1.17465	1.37128	-0.371277	2	6	0.327869	-2.66732	FALSE	low_coverage
Ctrl_SERIPH1st_1	Ctrl_Conv1st	ENSG00000231064.10	THBS3-AS1	chr1	155194805	155207322	+	12517	4918	7574	9	3.80419	1.58553	1.30169	1.10884	0.250042	1.47786	0.966692	0.0333083	4	95	0.042061	-4.25458	TRUE	unclassified
Ctrl_SERIPH1st_1	Ctrl_Conv1st	ENSG00000169231.14	THBS3	chr1	155195586	155209051	-	13465	4637	8555	17	3.23959	2.69144	1.72519	0.010336	0.340625	0.871626	1.69434	-0.694344	26	101	0.257171	-1.34126	TRUE	partially_spliced
Ctrl_SERIPH1st_1	Ctrl_Conv1st	ENSG00000173171.15	MTX1	chr1	155208694	155213824	+	5130	3282	1756	4	24.4391	21.356	4.02847	5.20105	0.141016	2.5714	0.506642	0.493358	221	291	0.759189	-0.20034	TRUE	mature_mRNA_like
Ctrl_SERIPH1st_1	Ctrl_Conv1st	ENSG00000291137.2	GBA1LP	chr1	155210694	155228027	-	17333	9852	7399	7	4.38439	2.53162	2.94729	2.19712	0.396585	0.557385	0.978077	0.0219227	27	220	0.122672	-0.649511	TRUE	partially_spliced
Ctrl_SERIPH1st_1	Ctrl_Conv1st	ENSG00000177628.17	GBA1	chr1	155234446	155245178	-	10732	4132	6428	10	64.4298	65.992	4.40432	2.30357	0.0638918	3.84058	0.830373	0.169627	683	982	0.695449	1.85443	TRUE	mature_mRNA_like
Ctrl_SERIPH1st_1	Ctrl_Conv1st	ENSG00000160767.24	ENTREP3	chr1	155247204	155255795	-	8591	4965	3532	8	143.403	175.111	1.86891	2.93768	0.0128561	6.18754	0.738257	0.261743	994	2395	0.415014	0.0506411	TRUE	mature_mRNA_like
Ctrl_SERIPH1st_1	Ctrl_Conv1st	ENSG00000116521.13	SCAMP3	chr1	155255978	155262433	-	6455	3862	2593	5	83.2504	108.11	3.27189	4.23327	0.0377719	4.62756	0.283425	0.716575	736	1107	0.6648	0.602147	TRUE	mature_mRNA_like
Ctrl_SERIPH1st_1	Ctrl_Conv1st	ENSG00000176444.20	CLK2	chr1	155262867	155278491	-	15624	3658	11872	8	100.789	104.398	5.41021	7.18526	0.0508962	4.19451	0.651349	0.348651	520	1452	0.358102	8.94413	TRUE	mature_mRNA_like
Ctrl_SERIPH1st_1	Ctrl_Conv1st	ENSG00000143630.11	HCN3	chr1	155277327	155289848	+	12521	4376	8145	6	8.79296	7.08714	1.31602	0.814564	0.128908	2.65082	1.0199	-0.0199025	20	164	0.121877	2.16628	TRUE	mature_mRNA_like
Ctrl_SERIPH1st_1	Ctrl_Conv1st	ENSG00000143627.19	PKLR	chr1	155289292	155301438	-	12146	3168	8692	8	0.0953285	0	0	0	0	0.965902	0	1	1	2	0.47619	0.786262	FALSE	low_coverage
Ctrl_SERIPH1st_1	Ctrl_Conv1st	ENSG00000160752.16	FDPS	chr1	155304785	155320666	+	15881	6394	9487	7	65.0188	107.59	6.25076	1.58245	0.0875831	3.35807	1.09822	-0.09822	1195	1585	0.753896	3.48329	TRUE	mature_mRNA_like
Ctrl_SERIPH1st_1	Ctrl_Conv1st	ENSG00000225855.8	RUSC1-AS1	chr1	155316855	155324385	-	7530	4189	3278	6	3.8582	3.73917	3.25625	2.77877	0.451351	0.237993	0.508581	0.491419	1	91	0.0109769	-0.397455	TRUE	pre_mRNA_like
Ctrl_SERIPH1st_1	Ctrl_Conv1st	ENSG00000160753.18	RUSC1	chr1	155320738	155331118	+	10380	6444	3888	6	35.1909	31.9276	1.75772	1.31563	0.0474435	4.24769	0.853287	0.146713	398	779	0.510846	4.60482	TRUE	mature_mRNA_like
Ctrl_SERIPH1st_1	Ctrl_Conv1st	ENSG00000116539.14	ASH1L	chr1	155335267	155563162	-	227895	13783	214030	31	56.8547	50.0652	2.00583	1.70227	0.0340199	4.75735	0.551216	0.448784	671	4059	0.165308	1.17507	TRUE	mature_mRNA_like
Ctrl_SERIPH1st_1	Ctrl_Conv1st	ENSG00000227773.1	ASH1L-IT1	chr1	155396009	155396978	-	969	448	521	1	0	0	0.579655	0.579655	0.852867	-2.7648			20	21	0.947867	-3.50818	FALSE	low_coverage
Ctrl_SERIPH1st_1	Ctrl_Conv1st	ENSG00000235919.6	ASH1L-AS1	chr1	155562025	155570755	+	8730	8036	694	1	6.27663	3.24367	2.4755	2.4755	0.279651	1.30794			1	175	0.00571102	-1.16752	TRUE	unclassified
Ctrl_SERIPH1st_1	Ctrl_Conv1st	ENSG00000125459.19	MSTO1	chr1	155563234	155616511	+	53277	5864	47049	2	20.9475	20.6311	1.50067	1.29828	0.066554	3.7169	0.145924	0.854076	209	661	0.31614	1.16241	TRUE	mature_mRNA_like
Ctrl_SERIPH1st_1	Ctrl_Conv1st	ENSG00000163374.22	YY1AP1	chr1	155659445	155689334	-	29889	8892	20902	15	43.6153	16.7531	4.30739	3.67229	0.0896949	3.31014	0.75477	0.24523	376	1609	0.233671	1.84012	TRUE	mature_mRNA_like
Ctrl_SERIPH1st_1	Ctrl_Conv1st	ENSG00000132676.17	DAP3	chr1	155687832	155739014	+	51182	5048	45973	18	56.1916	45.625	4.71538	4.13363	0.0772925	3.5472	0.775818	0.224182	766	1678	0.456469	1.54176	TRUE	mature_mRNA_like
Ctrl_SERIPH1st_1	Ctrl_Conv1st	ENSG00000116580.21	GON4L	chr1	155749658	155859400	-	109742	12076	97666	31	31.7718	28.5339	2.06826	1.49628	0.0609387	3.87767	0.931448	0.0685517	522	1965	0.265635	1.43281	TRUE	mature_mRNA_like
Ctrl_SERIPH1st_1	Ctrl_Conv1st	ENSG00000132718.10	SYT11	chr1	155859448	155885199	+	25751	5300	20451	3	16.3732	14.6992	0.455088	0.49492	0.0268833	4.89126	0.536915	0.463085	23	320	0.0718525	2.52674	TRUE	mature_mRNA_like
Ctrl_SERIPH1st_1	Ctrl_Conv1st	ENSG00000143622.13	RIT1	chr1	155897807	155911408	-	13601	4045	9555	5	11.7842	9.98438	1.355	0.833333	0.102348	3.02995	0.946571	0.0534292	32	206	0.155264	1.05031	TRUE	mature_mRNA_like
Ctrl_SERIPH1st_1	Ctrl_Conv1st	ENSG00000132680.12	KHDC4	chr1	155913042	155934413	-	21371	5648	15723	13	93.8929	162.066	7.16931	6.98083	0.0708694	3.69266	0.694836	0.305164	1007	2151	0.468133	1.04839	TRUE	mature_mRNA_like
Ctrl_SERIPH1st_1	Ctrl_Conv1st	ENSG00000173080.6	RXFP4	chr1	155941637	155943087	+	1450	1450			0	0							0	0	0	0	FALSE	low_coverage
Ctrl_SERIPH1st_1	Ctrl_Conv1st	ENSG00000116584.23	ARHGEF2	chr1	155946850	156007070	-	60220	9297	50923	34	30.9037	33.7206	1.53139	0.891784	0.0470688	4.24827	1.10165	-0.101647	475	1221	0.388994	6.30148	TRUE	mature_mRNA_like
Ctrl_SERIPH1st_1	Ctrl_Conv1st	ENSG00000273002.2	ARHGEF2-AS2	chr1	155978634	155982986	+	4352	2473	1879	4	1.98585	1.2	1.33262	1.74784	0.38983	0.541974	0.7272	0.2728	0	25	0	0.264849	TRUE	unclassified
Ctrl_SERIPH1st_1	Ctrl_Conv1st	ENSG00000224276.1	ARHGEF2-AS1	chr1	155991389	156001787	+	10398	401	9997	1	0	0	0	0	0	0			0	0	0	0	FALSE	low_coverage
Ctrl_SERIPH1st_1	Ctrl_Conv1st	ENSG00000163479.15	SSR2	chr1	156009040	156020968	-	11928	6838	5090	4	83.6223	97.6036	1.18861	1.05047	0.0139983	6.02173	0.936639	0.0633608	881	1928	0.456927	1.03381	TRUE	mature_mRNA_like
Ctrl_SERIPH1st_1	Ctrl_Conv1st	ENSG00000160803.9	UBQLN4	chr1	156035298	156053798	-	18500	3884	14616	10	168.572	225.979	3.8672	4.58404	0.0224134	5.40996	0.770637	0.229363	1069	2378	0.449519	0.500731	TRUE	mature_mRNA_like
Ctrl_SERIPH1st_1	Ctrl_Conv1st	ENSG00000116586.13	LAMTOR2	chr1	156054737	156058510	+	3773	1452	2321	3	56.0888	78.9335	2.59931	1.34762	0.0442149	4.37962	0.664571	0.335429	204	293	0.696008	-1.03711	TRUE	mature_mRNA_like
Ctrl_SERIPH1st_1	Ctrl_Conv1st	ENSG00000132698.16	RAB25	chr1	156061147	156070514	+	9367	1711	7603	3	0.99474	1.02027	0.133632	0	0.108788	2.22828	0.90101	0.0989896	2	9	0.21978	1.61823	TRUE	unclassified
Ctrl_SERIPH1st_1	Ctrl_Conv1st	ENSG00000254726.3	MEX3A	chr1	156072012	156082465	-	10453	6591	3862	1	37.8281	25.9382	1.75867	1.75867	0.0443139	4.35092			18	857	0.0210011	2.88373	TRUE	mature_mRNA_like
Ctrl_SERIPH1st_1	Ctrl_Conv1st	ENSG00000160789.26	LMNA	chr1	156082571	156140081	+	57510	8695	48691	22	26.4196	2.8417	1.24953	0.917229	0.0449973	4.29652	0.834398	0.165602	429	973	0.440859	2.41092	TRUE	mature_mRNA_like
Ctrl_SERIPH1st_1	Ctrl_Conv1st	ENSG00000196189.15	SEMA4A	chr1	156147365	156178869	+	31504	8537	22745	13	0.530631	0	0	0	0	2.6568	0	1	5	15	0.331126	2.20563	FALSE	low_coverage
Ctrl_SERIPH1st_1	Ctrl_Conv1st	ENSG00000160785.15	SLC25A44	chr1	156193931	156212796	+	18865	9250	9615	2	32.2291	43.5724	4.1013	4.13198	0.112579	2.94392	0.0135028	0.986497	95	1127	0.0842871	2.55563	TRUE	mature_mRNA_like
Ctrl_SERIPH1st_1	Ctrl_Conv1st	ENSG00000160783.20	PMF1	chr1	156212988	156240423	+	27435	3083	24352	8	148.861	74.9741	4.97783	4.40987	0.0323363	4.87458	0.572778	0.427222	584	1948	0.299779	2.43959	TRUE	mature_mRNA_like
Ctrl_SERIPH1st_1	Ctrl_Conv1st	ENSG00000242252.2	BGLAP	chr1	156242183	156243317	+	1134	964	170	1	12.5384	12.0469	1.21176	1.21176	0.0874911	3.26823			31	55	0.562613	1.66638	TRUE	mature_mRNA_like
Ctrl_SERIPH1st_1	Ctrl_Conv1st	ENSG00000160781.18	PAQR6	chr1	156243319	156248117	-	4798	3566	1215	5	3.35754	3.29851	2.89959	3.03953	0.456116	0.204983	0.613719	0.386281	10	57	0.175131	-0.442637	TRUE	pre_mRNA_like
Ctrl_SERIPH1st_1	Ctrl_Conv1st	ENSG00000198952.9	SMG5	chr1	156249222	156282844	-	33622	5402	28220	20	205.35	210.424	6.45882	5.81587	0.0304792	4.96921	0.530048	0.469952	1896	4308	0.440101	0.763739	TRUE	mature_mRNA_like
Ctrl_SERIPH1st_1	Ctrl_Conv1st	ENSG00000163472.20	TMEM79	chr1	156282934	156293185	+	10251	3468	6783	4	6.83708	4.4342	0.966092	1.51263	0.122241	2.702	0.700858	0.299142	13	102	0.127326	-0.715873	TRUE	mature_mRNA_like
Ctrl_SERIPH1st_1	Ctrl_Conv1st	ENSG00000198715.14	GLMP	chr1	156290088	156295689	-	5601	3471	2130	6	93.1976	55.9364	11.3427	9.189	0.108397	3.02741	0.495163	0.504837	469	1161	0.403927	-3.27017	TRUE	mature_mRNA_like
Ctrl_SERIPH1st_1	Ctrl_Conv1st	ENSG00000189030.10	VHLL	chr1	156298623	156299307	-	684	684			0	0							0	0	0	0	FALSE	low_coverage
Ctrl_SERIPH1st_1	Ctrl_Conv1st	ENSG00000163468.16	CCT3	chr1	156308959	156367873	-	58914	3954	54868	16	568.36	761.908	4.95456	9.43398	0.00864046	6.81333	1.26339	-0.263385	5894	8408	0.700991	9.5635	TRUE	mature_mRNA_like
Ctrl_SERIPH1st_1	Ctrl_Conv1st	ENSG00000163467.13	TSACC	chr1	156337313	156346995	+	9682	1152	8471	4	2.81424	3.6	0.741707	0.712002	0.202877	1.79173	0.629655	0.370345	11	34	0.322581	-0.0696897	TRUE	partially_spliced
Ctrl_SERIPH1st_1	Ctrl_Conv1st	ENSG00000132677.14	RHBG	chr1	156369208	156385219	+	16011	3482	12529	10	0.0212521	0	0.136403	0	0.529402	-0.963241	0.864503	0.135497	0	6	0	0.330975	FALSE	low_coverage
Ctrl_SERIPH1st_1	Ctrl_Conv1st	ENSG00000125462.21	MIR9-1HG	chr1	156404242	156456987	-	52745	18058	34687	21	0.353195	0	0.187332	0.060341	0.292466	0.657411	1.0836	-0.0835996	6	44	0.136054	0.0980659	FALSE	low_coverage
Ctrl_SERIPH1st_1	Ctrl_Conv1st	ENSG00000116604.20	MEF2D	chr1	156463726	156501266	-	37540	13312	24172	18	21.5925	28.6473	4.26949	3.38856	0.164452	2.31166	0.591055	0.408945	299	1305	0.229101	1.25925	TRUE	partially_spliced
Ctrl_SERIPH1st_1	Ctrl_Conv1st	ENSG00000183856.12	IQGAP3	chr1	156525404	156572604	-	47200	6742	40275	34	55.5761	52.3077	2.67886	2.18324	0.0459063	4.32449	0.974796	0.0252039	858	1612	0.532225	0.554445	TRUE	mature_mRNA_like
Ctrl_SERIPH1st_1	Ctrl_Conv1st	ENSG00000187862.13	TTC24	chr1	156579722	156587719	+	7997	3782	4215	9	0	0	0	0	0	0	0	1	0	0	0	0	FALSE	low_coverage
Ctrl_SERIPH1st_1	Ctrl_Conv1st	ENSG00000163382.14	NAXE	chr1	156591742	156609507	+	17765	11638	6031	3	29.2547	3.82095	0.536395	0.33743	0.017945	5.52752	0.625695	0.374305	749	1147	0.652951	-6.26958	TRUE	mature_mRNA_like
Ctrl_SERIPH1st_1	Ctrl_Conv1st	ENSG00000160818.17	GPATCH4	chr1	156594300	156601496	-	7196	4622	2574	3	32.2536	28.7893	12.7988	8.35644	0.283457	1.32669	0.42614	0.57386	94	609	0.154326	1.00084	TRUE	partially_spliced
Ctrl_SERIPH1st_1	Ctrl_Conv1st	ENSG00000229953.2	BCAN-AS2	chr1	156614739	156661503	-	46764	4265	42438	9	4.32005	0	1.27534	0	0.223925	1.68427	1.70488	-0.704884	1	243	0.00411353	-4.86582	TRUE	unclassified
Ctrl_SERIPH1st_1	Ctrl_Conv1st	ENSG00000132702.14	HAPLN2	chr1	156619330	156626361	+	7031	3229	3758	3	0.294518	0.095904	0.0875466	0.055925	0.181607	1.07284	0.748907	0.251093	0	5	0	0.825013	FALSE	low_coverage
Ctrl_SERIPH1st_1	Ctrl_Conv1st	ENSG00000272068.1	BCAN-AS1	chr1	156637782	156641004	-	3222	3222			0.346369	0.346369							1	7	0.140845	-2.85862	FALSE	low_coverage
Ctrl_SERIPH1st_1	Ctrl_Conv1st	ENSG00000132692.20	BCAN	chr1	156641389	156659532	+	18143	4992	13151	15	0.0604968	0	0	0	0	0.682544	0	1	0	1	0	0	FALSE	low_coverage
Ctrl_SERIPH1st_1	Ctrl_Conv1st	ENSG00000132688.12	NES	chr1	156668762	156677407	-	8645	5568	3077	3	3.4463	5.14208	0.00194999	0	0.000549563	5.12038	0.10554	0.89446	5	67	0.0745156	2.3601	TRUE	mature_mRNA_like
Ctrl_SERIPH1st_1	Ctrl_Conv1st	ENSG00000143320.10	CRABP2	chr1	156699596	156708094	-	8498	1561	6937	7	23.7796	18.4201	2.38576	0.923488	0.0908328	3.26402	1.01606	-0.0160629	86	187	0.459647	0.865333	TRUE	mature_mRNA_like
Ctrl_SERIPH1st_1	Ctrl_Conv1st	ENSG00000143319.19	ISG20L2	chr1	156720795	156728766	-	7971	6324	1647	3	95.9342	99.985	15.606	17.3333	0.139788	2.61224	0.182016	0.817984	366	2126	0.172146	-1.30729	TRUE	mature_mRNA_like
Ctrl_SERIPH1st_1	Ctrl_Conv1st	ENSG00000143303.13	METTL25B	chr1	156728441	156736960	+	8519	3182	5303	7	30.4887	31.4468	10.0503	5.30724	0.247308	1.59147	1.0679	-0.0679037	82	502	0.163314	-1.67457	TRUE	partially_spliced
Ctrl_SERIPH1st_1	Ctrl_Conv1st	ENSG00000143314.13	MRPL24	chr1	156737293	156741590	-	4297	3726	369	2	29.621	43.449	4.72358	4.53987	0.137135	2.62331	0.105109	0.894891	158	380	0.41568	1.66454	TRUE	mature_mRNA_like
Ctrl_SERIPH1st_1	Ctrl_Conv1st	ENSG00000143321.19	HDGF	chr1	156742108	156766925	-	24817	3720	21097	9	518.302	10.0815	5.27212	2.95395	0.0100676	6.59244	1.2465	-0.246496	1874	6811	0.275139	8.55866	TRUE	mature_mRNA_like
Ctrl_SERIPH1st_1	Ctrl_Conv1st	ENSG00000143294.16	PRCC	chr1	156750609	156800817	+	50208	4183	46025	9	172.368	162.713	4.77988	8.76685	0.0269671	5.14334	0.370065	0.629935	771	3143	0.245299	5.0679	TRUE	mature_mRNA_like
Ctrl_SERIPH1st_1	Ctrl_Conv1st	ENSG00000027869.14	SH2D2A	chr1	156806234	156817014	-	10780	3294	7393	6	0.410443	0.105311	0.0213716	0	0.0401861	2.07232	0.713447	0.286553	3	5	0.588235	0.406693	FALSE	low_coverage
Ctrl_SERIPH1st_1	Ctrl_Conv1st	ENSG00000198400.15	NTRK1	chr1	156815635	156881850	+	66215	5209	60998	19	0.55001	0.216749	0.308862	0.195876	0.32211	0.668846	0.779379	0.220621	3	74	0.0404858	-0.23056	FALSE	low_coverage
Ctrl_SERIPH1st_1	Ctrl_Conv1st	ENSG00000027644.5	INSRR	chr1	156840062	156859117	-	19055	5200	13599	18	0.0573077	0	0.0426502	0	0.213296	0.141107	0.954999	0.0450009	0	3	0	-0.460795	FALSE	low_coverage
Ctrl_SERIPH1st_1	Ctrl_Conv1st	ENSG00000187800.15	PEAR1	chr1	156893665	156916432	+	22767	5683	16722	18	0.106106	0	0.0535822	0	0.206333	0.424375	1.29862	-0.298624	0	5	0	0.39938	FALSE	low_coverage
Ctrl_SERIPH1st_1	Ctrl_Conv1st	ENSG00000160838.15	LRRC71	chr1	156920630	156933094	+	12464	2650	9388	10	0	0	0.0321688	0	0.243392	-0.402381	0.567314	0.432686	0	1	0	0.854331	FALSE	low_coverage
Ctrl_SERIPH1st_1	Ctrl_Conv1st	ENSG00000132694.21	ARHGEF11	chr1	156934839	157046903	-	112064	10022	101855	40	37.738	46.7632	1.90382	1.51969	0.0479048	4.23901	0.687721	0.312279	777	1911	0.406572	1.39572	TRUE	mature_mRNA_like
Ctrl_SERIPH1st_1	Ctrl_Conv1st	ENSG00000253831.4	ETV3L	chr1	157092042	157117877	-	25835	2544	23204	9	0	0	0	0	0	0	0	1	0	0	0	0	FALSE	low_coverage
Ctrl_SERIPH1st_1	Ctrl_Conv1st	ENSG00000117036.12	ETV3	chr1	157121190	157138474	-	17284	6707	10577	4	39.8546	33.9465	3.07119	3.21993	0.0713802	3.65527	0.125889	0.874111	72	1002	0.0718491	2.2332	TRUE	mature_mRNA_like
Ctrl_SERIPH1st_1	Ctrl_Conv1st	ENSG00000143297.20	FCRL5	chr1	157513376	157552515	-	39139	12414	26648	16	0	0	0	0	0	0	0	1	0	0	0	0	FALSE	low_coverage
Ctrl_SERIPH1st_1	Ctrl_Conv1st	ENSG00000163518.11	FCRL4	chr1	157573746	157598085	-	24339	3882	20369	9	0	0	0	0	0	0	0	1	0	0	0	0	FALSE	low_coverage
Ctrl_SERIPH1st_1	Ctrl_Conv1st	ENSG00000160856.22	FCRL3	chr1	157674320	157700901	-	26581	6492	19923	11	0	0	0	0	0	0	0	1	0	0	0	0	FALSE	low_coverage
Ctrl_SERIPH1st_1	Ctrl_Conv1st	ENSG00000227217.2	FCRL3-AS1	chr1	157691761	157696644	+	4883	1097	3786	2	0	0	0	0	0	0	0	1	0	0	0	0	FALSE	low_coverage
Ctrl_SERIPH1st_1	Ctrl_Conv1st	ENSG00000132704.17	FCRL2	chr1	157745732	157777269	-	31537	5195	26148	7	0	0	0	0	0	0	0	1	0	0	0	0	FALSE	low_coverage
Ctrl_SERIPH1st_1	Ctrl_Conv1st	ENSG00000163534.17	FCRL1	chr1	157792248	157820183	-	27935	6201	21687	9	0	0	0.0139254	0	0.122233	-0.18809	0.071795	0.928205	0	1	0	0	FALSE	low_coverage
Ctrl_SERIPH1st_1	Ctrl_Conv1st	ENSG00000073754.6	CD5L	chr1	157830910	157898256	-	67346	2469	64877	7	0	0	0	0	0	0	0	1	0	0	0	0	FALSE	low_coverage
Ctrl_SERIPH1st_1	Ctrl_Conv1st	ENSG00000183853.19	KIRREL1	chr1	157993272	158100262	+	106990	7872	99029	13	39.2152	46.0596	2.30585	1.2256	0.0554011	4.03047	1.06691	-0.0669085	333	1790	0.186023	1.60174	TRUE	mature_mRNA_like
Ctrl_SERIPH1st_1	Ctrl_Conv1st	ENSG00000226520.1	KIRREL1-IT1	chr1	158025549	158031166	+	5617	587	5030	1	3.65928	2.67098	1.85706	1.85706	0.330653	0.941771			31	71	0.436006	1.00219	TRUE	partially_spliced
Ctrl_SERIPH1st_1	Ctrl_Conv1st	ENSG00000288460.1	SMIM42	chr1	158127286	158128301	-	1015	1015			0	0							0	0	0	0	FALSE	low_coverage
Ctrl_SERIPH1st_1	Ctrl_Conv1st	ENSG00000158473.9	CD1D	chr1	158178014	158186427	+	8413	4407	3910	5	0	0	0	0	0	0	0	1	0	0	0	0	FALSE	low_coverage
Ctrl_SERIPH1st_1	Ctrl_Conv1st	ENSG00000158477.8	CD1A	chr1	158254423	158258269	+	3846	1809	2037	5	0	0	0	0	0	0	0	1	0	0	0	0	FALSE	low_coverage
Ctrl_SERIPH1st_1	Ctrl_Conv1st	ENSG00000158481.13	CD1C	chr1	158289922	158294774	+	4852	2442	2410	5	0	0	0	0	0	0	0	1	0	0	0	0	FALSE	low_coverage
Ctrl_SERIPH1st_1	Ctrl_Conv1st	ENSG00000158485.12	CD1B	chr1	158327950	158331531	-	3581	1395	2186	5	0	0	0	0	0	0	0	1	0	0	0	0	FALSE	low_coverage
Ctrl_SERIPH1st_1	Ctrl_Conv1st	ENSG00000158488.17	CD1E	chr1	158353695	158357553	+	3858	2203	1655	6	0	0	0	0	0	0	0	1	0	0	0	0	FALSE	low_coverage
Ctrl_SERIPH1st_1	Ctrl_Conv1st	ENSG00000186306.1	OR10T2	chr1	158398521	158399466	-	945	945			0	0							0	0	0	0	FALSE	low_coverage
Ctrl_SERIPH1st_1	Ctrl_Conv1st	ENSG00000180708.6	OR10K2	chr1	158418209	158426237	-	8028	3023	5005	1	0	0	0	0	0	0			0	0	0	0	FALSE	low_coverage
Ctrl_SERIPH1st_1	Ctrl_Conv1st	ENSG00000173285.5	OR10K1	chr1	158461573	158470857	+	9284	3936	5289	2	0	0	0	0	0	0	0	1	0	0	0	0	FALSE	low_coverage
Ctrl_SERIPH1st_1	Ctrl_Conv1st	ENSG00000198965.5	OR10R2	chr1	158472219	158480936	+	8717	1159	7558	1	0	0	0	0	0	0			0	0	0	0	FALSE	low_coverage
Ctrl_SERIPH1st_1	Ctrl_Conv1st	ENSG00000197532.3	OR6Y1	chr1	158544549	158554405	-	9856	5128	4728	1	0	0	0	0	0	0			0	0	0	0	FALSE	low_coverage
Ctrl_SERIPH1st_1	Ctrl_Conv1st	ENSG00000186440.3	OR6P1	chr1	158560605	158570580	-	9975	3255	6720	2	0	0	0	0	0	0	0	1	0	0	0	0	FALSE	low_coverage
Ctrl_SERIPH1st_1	Ctrl_Conv1st	ENSG00000279111.2	OR10X1	chr1	158578918	158579899	-	981	981			0	0							0	0	0	0	FALSE	low_coverage
Ctrl_SERIPH1st_1	Ctrl_Conv1st	ENSG00000198967.5	OR10Z1	chr1	158605267	158612514	+	7247	6323	924	1	0	0	0	0	0	0			0	0	0	0	FALSE	low_coverage
Ctrl_SERIPH1st_1	Ctrl_Conv1st	ENSG00000163554.15	SPTA1	chr1	158610703	158686715	-	76012	10108	65904	52	0	0	0	0	0	0	0	1	0	0	0	0	FALSE	low_coverage
Ctrl_SERIPH1st_1	Ctrl_Conv1st	ENSG00000196171.3	OR6K2	chr1	158699677	158700652	-	975	975			0	0							0	0	0	0	FALSE	low_coverage
Ctrl_SERIPH1st_1	Ctrl_Conv1st	ENSG00000203757.2	OR6K3	chr1	158716326	158720720	-	4394	1875	2519	1	0	0	0	0	0	0			0	0	0	0	FALSE	low_coverage
Ctrl_SERIPH1st_1	Ctrl_Conv1st	ENSG00000197403.5	OR6N1	chr1	158747813	158772195	-	24382	2726	21656	2	0	0	0	0	0	0	0	1	0	0	0	0	FALSE	low_coverage
Ctrl_SERIPH1st_1	Ctrl_Conv1st	ENSG00000180433.6	OR6K6	chr1	158754719	158755891	+	1172	1172			0	0							0	0	0	0	FALSE	low_coverage
Ctrl_SERIPH1st_1	Ctrl_Conv1st	ENSG00000188340.3	OR6N2	chr1	158774221	158781204	-	6983	3455	3528	1	0	0	0	0	0	0			0	0	0	0	FALSE	low_coverage
Ctrl_SERIPH1st_1	Ctrl_Conv1st	ENSG00000163563.9	MNDA	chr1	158831331	158849506	+	18175	2077	16098	6	0	0	0	0	0	0	0	1	0	0	0	0	FALSE	low_coverage
Ctrl_SERIPH1st_1	Ctrl_Conv1st	ENSG00000163564.15	PYHIN1	chr1	158930795	158977059	+	46264	3484	42780	10	0	0	0	0	0	0	0	1	0	0	0	0	FALSE	low_coverage
Ctrl_SERIPH1st_1	Ctrl_Conv1st	ENSG00000163565.21	IFI16	chr1	158999952	159055156	+	55204	5322	49882	13	0.0351371	0	0.00230545	0	0.0167739	0.401541	0.172404	0.827596	0	1	0	0	FALSE	low_coverage
Ctrl_SERIPH1st_1	Ctrl_Conv1st	ENSG00000289721.1	PYDC5	chr1	158999970	159002751	-	2781	2781			0	0							0	0	0	0	FALSE	low_coverage
Ctrl_SERIPH1st_1	Ctrl_Conv1st	ENSG00000163568.18	AIM2	chr1	159056128	159188222	-	132094	8899	123195	15	0	0	0	0	0	0	0	1	0	0	0	0	FALSE	low_coverage
Ctrl_SERIPH1st_1	Ctrl_Conv1st	ENSG00000225670.5	CADM3-AS1	chr1	159170319	159211455	-	41136	6805	34331	9	0	0	0	0	0	0	0	1	0	0	0	0	FALSE	low_coverage
Ctrl_SERIPH1st_1	Ctrl_Conv1st	ENSG00000162706.14	CADM3	chr1	159171608	159203313	+	31705	3994	27711	11	0	0	0	0	0	0	0	1	0	0	0	0	FALSE	low_coverage
Ctrl_SERIPH1st_1	Ctrl_Conv1st	ENSG00000213088.15	ACKR1	chr1	159204567	159206500	+	1933	1520	278	1	0	0	0	0	0	0			0	0	0	0	FALSE	low_coverage
Ctrl_SERIPH1st_1	Ctrl_Conv1st	ENSG00000179639.11	FCER1A	chr1	159289713	159308224	+	18511	1165	17346	5	0	0	0	0	0	0	0	1	0	0	0	0	FALSE	low_coverage
Ctrl_SERIPH1st_1	Ctrl_Conv1st	ENSG00000196266.6	OR10J3	chr1	159313719	159314659	-	940	940			0	0							0	0	0	0	FALSE	low_coverage
Ctrl_SERIPH1st_1	Ctrl_Conv1st	ENSG00000249730.1	OR10J4	chr1	159432203	159433138	+	935	935			0	0							0	0	0	0	FALSE	low_coverage
Ctrl_SERIPH1st_1	Ctrl_Conv1st	ENSG00000196184.10	OR10J1	chr1	159437844	159443078	+	5234	3557	1677	1	0	0	0	0	0	0			0	0	0	0	FALSE	low_coverage
Ctrl_SERIPH1st_1	Ctrl_Conv1st	ENSG00000184155.8	OR10J5	chr1	159535077	159536007	-	930	930			0	0							0	0	0	0	FALSE	low_coverage
Ctrl_SERIPH1st_1	Ctrl_Conv1st	ENSG00000132703.4	APCS	chr1	159587825	159588865	+	1040	925	115	1	0	0	0	0	0	0			0	0	0	0	FALSE	low_coverage
Ctrl_SERIPH1st_1	Ctrl_Conv1st	ENSG00000132693.12	CRP	chr1	159712288	159714589	-	2301	2015	286	1	0	0	0	0	0	0			0	0	0	0	FALSE	low_coverage
Ctrl_SERIPH1st_1	Ctrl_Conv1st	ENSG00000158716.10	DUSP23	chr1	159780931	159782543	+	1612	869	743	1	2.77906	2.80219	0.407806	0.407806	0.124072	2.50325			3	9	0.32967	-0.0494046	TRUE	mature_mRNA_like
Ctrl_SERIPH1st_1	Ctrl_Conv1st	ENSG00000181036.15	FCRL6	chr1	159800510	159816262	+	15752	2682	12994	8	0	0	0	0	0	0	0	1	0	0	0	0	FALSE	low_coverage
Ctrl_SERIPH1st_1	Ctrl_Conv1st	ENSG00000158714.12	SLAMF8	chr1	159826692	159837492	+	10800	3320	7400	3	0	0	0	0	0	0	0	1	0	0	0	0	FALSE	low_coverage
Ctrl_SERIPH1st_1	Ctrl_Conv1st	ENSG00000188004.11	SNHG28	chr1	159834479	159855071	-	20592	5656	14936	5	0.266796	0	0.060659	0	0.141907	1.19098	0.289546	0.710454	0	8	0	1.20938	FALSE	low_coverage
Ctrl_SERIPH1st_1	Ctrl_Conv1st	ENSG00000243284.1	VSIG8	chr1	159854315	159862657	-	8342	1818	6524	6	0	0	0.416309	0.175818	0.806317	-2.36823	0.777882	0.222118	0	9	0	-0.629801	FALSE	low_coverage
Ctrl_SERIPH1st_1	Ctrl_Conv1st	ENSG00000213085.10	CFAP45	chr1	159872363	159900165	-	27802	2627	25175	12	0.740769	0	0.315154	0.134092	0.272643	1.01806	0.967401	0.0325987	3	33	0.0906344	1.07103	TRUE	unclassified
Ctrl_SERIPH1st_1	Ctrl_Conv1st	ENSG00000158710.16	TAGLN2	chr1	159918106	159925525	-	7419	6663	653	3	318.746	71.9765	8.66003	7.78035	0.0264423	5.18578	0.538289	0.461711	2042	7094	0.287845	5.21986	TRUE	mature_mRNA_like
Ctrl_SERIPH1st_1	Ctrl_Conv1st	ENSG00000085552.19	IGSF9	chr1	159927038	159949468	-	22430	7388	14739	16	2.78858	2.41118	0.632065	0	0.179531	1.98032	2.21569	-1.21569	31	100	0.30969	1.55609	TRUE	partially_spliced
Ctrl_SERIPH1st_1	Ctrl_Conv1st	ENSG00000162723.10	SLAMF9	chr1	159951491	159954237	-	2746	1139	1607	3	0	0	0	0	0	0	0	1	0	0	0	0	FALSE	low_coverage
Ctrl_SERIPH1st_1	Ctrl_Conv1st	ENSG00000177807.12	KCNJ10	chr1	159998650	160070483	-	71833	6615	65218	5	0.0913075	0	3.04099	0	0.940814	-4.03725	1.81762	-0.817624	0	668	0	0.453025	TRUE	unclassified
Ctrl_SERIPH1st_1	Ctrl_Conv1st	ENSG00000143315.8	PIGM	chr1	160024952	160031990	-	7038	7038			27.7506	27.7506							0	656	0	-2.94823	TRUE	unclassified
Ctrl_SERIPH1st_1	Ctrl_Conv1st	ENSG00000162728.6	KCNJ9	chr1	160081500	160090563	+	9063	4448	4615	4	0.0647482	0	0	0	0	0.720262	0	1	1	1	0.909091	-1.04237	FALSE	low_coverage
Ctrl_SERIPH1st_1	Ctrl_Conv1st	ENSG00000162729.15	IGSF8	chr1	160091339	160101109	-	9770	3363	6311	9	25.6598	6.70641	0.823166	0	0.0309659	4.80239	1.19309	-0.193088	150	305	0.491642	4.16263	TRUE	mature_mRNA_like
Ctrl_SERIPH1st_1	Ctrl_Conv1st	ENSG00000018625.16	ATP1A2	chr1	160115757	160143595	+	27838	6327	21511	22	0	0	0	0	0	0	0	1	0	0	0	0	FALSE	low_coverage
Ctrl_SERIPH1st_1	Ctrl_Conv1st	ENSG00000132681.17	ATP1A4	chr1	160151585	160186980	+	35395	6271	29124	22	0.00111625	0	0	0	0	0.0160148	0	1	1	1	0.909091	0.00947617	FALSE	low_coverage
Ctrl_SERIPH1st_1	Ctrl_Conv1st	ENSG00000143318.14	CASQ1	chr1	160190384	160201886	+	11502	2257	9155	11	0.901196	0	0	0	0	3.32365	0	1	1	8	0.123457	-0.967738	FALSE	low_coverage
Ctrl_SERIPH1st_1	Ctrl_Conv1st	ENSG00000227741.2	PEA15-AS1	chr1	160202192	160208869	-	6677	1731	4890	3	1.23975	0.923077	1.45849	2.50745	0.521217	-0.218186	0.490566	0.509434	1	33	0.0302115	-2.59567	TRUE	pre_mRNA_like
Ctrl_SERIPH1st_1	Ctrl_Conv1st	ENSG00000162734.14	PEA15	chr1	160205334	160215404	+	10070	7588	2482	3	51.612	81.5948	8.78767	9.87245	0.145252	2.54062	0.354905	0.645095	215	1381	0.155673	3.71457	TRUE	mature_mRNA_like
Ctrl_SERIPH1st_1	Ctrl_Conv1st	ENSG00000132716.20	DCAF8	chr1	160215714	160263388	-	47674	11063	36611	21	60.3756	50.8138	6.5108	4.62679	0.0971959	3.19346	1.16861	-0.168608	589	3032	0.194255	1.76613	TRUE	mature_mRNA_like
Ctrl_SERIPH1st_1	Ctrl_Conv1st	ENSG00000228606.5	DCAF8-DT	chr1	160261681	160281935	+	20254	2404	17850	3	0.586938	0	0.0845377	0	0.109579	1.89626	0.79864	0.20136	1	11	0.0900901	-2.53751	FALSE	low_coverage
Ctrl_SERIPH1st_1	Ctrl_Conv1st	ENSG00000162735.20	PEX19	chr1	160276806	160286348	-	9542	4470	5072	8	95.3633	96.8453	1.74211	1.66897	0.017922	5.69551	0.773862	0.226138	355	1450	0.244811	3.53667	TRUE	mature_mRNA_like
Ctrl_SERIPH1st_1	Ctrl_Conv1st	ENSG00000122218.18	COPA	chr1	160288593	160343566	-	54973	17703	37099	22	63.5646	155.283	2.84	1.95912	0.0427038	4.43661	0.745674	0.254326	2730	4107	0.664703	1.77586	TRUE	mature_mRNA_like
Ctrl_SERIPH1st_1	Ctrl_Conv1st	ENSG00000162736.19	NCSTN	chr1	160343293	160358957	+	15664	11489	4175	9	40.1098	48.8533	3.30132	3.36639	0.0758729	3.56338	0.488562	0.511438	879	1588	0.553492	2.57277	TRUE	mature_mRNA_like
Ctrl_SERIPH1st_1	Ctrl_Conv1st	ENSG00000171786.6	NHLH1	chr1	160367070	160372846	+	5776	2557	3219	1	2.37857	1.83086	2.05033	2.05033	0.452721	0.204952			2	44	0.0453515	0.299761	TRUE	unclassified
Ctrl_SERIPH1st_1	Ctrl_Conv1st	ENSG00000162738.8	VANGL2	chr1	160400563	160428678	+	28115	5362	22753	7	22.793	25.3001	0.902518	0.506834	0.0379281	4.51321	0.866495	0.133505	72	477	0.150912	4.11027	TRUE	mature_mRNA_like
Ctrl_SERIPH1st_1	Ctrl_Conv1st	ENSG00000162739.15	SLAMF6	chr1	160485029	160523273	-	38244	2757	35487	7	0	0	0	0	0	0	0	1	0	0	0	0	FALSE	low_coverage
Ctrl_SERIPH1st_1	Ctrl_Conv1st	ENSG00000066294.16	CD84	chr1	160541094	160579516	-	38422	9255	29167	7	0	0	0	0	0	0	0	1	0	0	0	0	FALSE	low_coverage
Ctrl_SERIPH1st_1	Ctrl_Conv1st	ENSG00000117090.17	SLAMF1	chr1	160608099	160647044	-	38945	4018	34927	7	0	0	0	0	0	0	0	1	0	0	0	0	FALSE	low_coverage
Ctrl_SERIPH1st_1	Ctrl_Conv1st	ENSG00000117091.11	CD48	chr1	160678745	160711831	-	33086	3254	29832	3	0	0	0	0	0	0	0	1	0	0	0	0	FALSE	low_coverage
Ctrl_SERIPH1st_1	Ctrl_Conv1st	ENSG00000026751.18	SLAMF7	chr1	160739056	160754821	+	15765	4833	10932	5	0	0	0.138126	0	0.580055	-1.25173	0.526912	0.473088	0	5	0	-1.54351	FALSE	low_coverage
Ctrl_SERIPH1st_1	Ctrl_Conv1st	ENSG00000122224.20	LY9	chr1	160796073	160828483	+	32410	9343	23046	11	0	0	0	0	0	0	0	1	0	0	0	0	FALSE	low_coverage
Ctrl_SERIPH1st_1	Ctrl_Conv1st	ENSG00000122223.14	CD244	chr1	160830159	160862904	-	32745	2906	29756	7	0	0	0	0	0	0	0	1	0	0	0	0	FALSE	low_coverage
Ctrl_SERIPH1st_1	Ctrl_Conv1st	ENSG00000179914.6	ITLN1	chr1	160876538	160893012	-	16474	2278	14108	11	0	0	0	0	0	0	0	1	0	0	0	0	FALSE	low_coverage
Ctrl_SERIPH1st_1	Ctrl_Conv1st	ENSG00000158764.8	ITLN2	chr1	160944265	160954889	-	10624	2485	8109	6	0	0	0	0	0	0	0	1	0	0	0	0	FALSE	low_coverage
Ctrl_SERIPH1st_1	Ctrl_Conv1st	ENSG00000158769.20	F11R	chr1	160995210	161023123	-	27913	6717	21196	10	15.4308	18.6821	0.765333	0.002066	0.0469639	4.16574	1.46986	-0.469862	97	401	0.241835	3.51891	TRUE	mature_mRNA_like
Ctrl_SERIPH1st_1	Ctrl_Conv1st	ENSG00000215845.12	TSTD1	chr1	161037630	161038977	-	1347	1197	150	1	1.50794	0.821201	0	0	0	4.00714			1	7	0.140845	5.23644	TRUE	mature_mRNA_like
Ctrl_SERIPH1st_1	Ctrl_Conv1st	ENSG00000158773.15	USF1	chr1	161039248	161045977	-	6729	2549	4117	9	59.093	63.795	2.01409	2.25651	0.0329061	4.80732	0.756741	0.243259	294	532	0.552528	3.20424	TRUE	mature_mRNA_like
Ctrl_SERIPH1st_1	Ctrl_Conv1st	ENSG00000186517.14	ARHGAP30	chr1	161046945	161069970	-	23025	5064	17790	8	0.381517	0.131783	0.205621	0	0.299243	0.655841	0.799994	0.200006	4	20	0.199005	-0.0263316	FALSE	low_coverage
Ctrl_SERIPH1st_1	Ctrl_Conv1st	ENSG00000143217.10	NECTIN4	chr1	161070987	161090045	-	19058	3633	15425	9	7.15056	3.32667	0.235397	0.077116	0.0314451	4.43415	1.42902	-0.429024	19	100	0.18981	5.08153	TRUE	mature_mRNA_like
Ctrl_SERIPH1st_1	Ctrl_Conv1st	ENSG00000228917.2	NECTIN4-AS1	chr1	161083813	161092327	+	8514	2474	5966	4	0	0	0	0	0	0	0	1	0	0	0	0	FALSE	low_coverage
Ctrl_SERIPH1st_1	Ctrl_Conv1st	ENSG00000162755.15	KLHDC9	chr1	161098360	161100346	+	1986	1720	264	1	6.28372	7.9308	0.897727	0.897727	0.12329	2.67768			8	37	0.215633	0.748033	TRUE	mature_mRNA_like
Ctrl_SERIPH1st_1	Ctrl_Conv1st	ENSG00000143256.6	PFDN2	chr1	161100555	161118069	-	17514	635	16879	3	47.789	62.6618	3.56153	2.8266	0.0692224	3.70918	0.505571	0.494429	90	309	0.291168	0.599705	TRUE	mature_mRNA_like
Ctrl_SERIPH1st_1	Ctrl_Conv1st	ENSG00000158793.15	NIT1	chr1	161118081	161125445	+	7364	3798	3540	5	18.222	28.8397	4.80565	3.98496	0.207788	1.90106	0.672042	0.327958	93	288	0.322805	-2.15419	TRUE	partially_spliced
Ctrl_SERIPH1st_1	Ctrl_Conv1st	ENSG00000158796.18	DEDD	chr1	161120972	161133280	-	12308	8516	3792	6	16.9602	52.9721	1.95992	0.937504	0.103044	3.04998	0.895387	0.104613	128	509	0.251424	3.66447	TRUE	mature_mRNA_like
Ctrl_SERIPH1st_1	Ctrl_Conv1st	ENSG00000143222.13	UFC1	chr1	161152775	161158856	+	6081	2270	3790	5	71.0938	36.3542	0.795251	0.654696	0.0110468	6.31332	0.709523	0.290477	367	550	0.667151	3.93217	TRUE	mature_mRNA_like
Ctrl_SERIPH1st_1	Ctrl_Conv1st	ENSG00000143258.17	USP21	chr1	161159449	161165723	+	6274	3764	2424	9	60.5128	69.7603	8.46122	9.03279	0.122495	2.82373	0.655107	0.344893	382	835	0.45743	0.2063	TRUE	mature_mRNA_like
Ctrl_SERIPH1st_1	Ctrl_Conv1st	ENSG00000143224.19	PPOX	chr1	161165836	161178013	+	12177	5084	7041	8	14.5625	16.0204	2.03678	1.0124	0.121968	2.77862	1.15093	-0.150927	125	295	0.423585	-2.2311	TRUE	mature_mRNA_like
Ctrl_SERIPH1st_1	Ctrl_Conv1st	ENSG00000158850.16	B4GALT3	chr1	161171305	161178652	-	7347	4601	2746	4	63.4542	122.243	6.66133	4.71749	0.0948696	3.23261	0.460578	0.539422	417	1038	0.401695	2.07513	TRUE	mature_mRNA_like
Ctrl_SERIPH1st_1	Ctrl_Conv1st	ENSG00000158859.11	ADAMTS4	chr1	161184301	161200509	-	16208	10465	5743	8	0.230483	0.25784	0	0	0	1.72458	0	1	6	9	0.659341	-2.19084	FALSE	low_coverage
Ctrl_SERIPH1st_1	Ctrl_Conv1st	ENSG00000158864.14	NDUFS2	chr1	161197103	161214723	+	17620	8979	8641	10	41.469	4.18182	1.89909	0.769548	0.0436892	4.3781	1.03155	-0.031555	1099	1299	0.84597	7.98919	TRUE	mature_mRNA_like
Ctrl_SERIPH1st_1	Ctrl_Conv1st	ENSG00000158869.12	FCER1G	chr1	161215233	161220699	+	5466	1068	4398	5	0	0	0.0686678	0	0.407119	-0.754185	0.375273	0.624727	1	2	0.47619	0	FALSE	low_coverage
Ctrl_SERIPH1st_1	Ctrl_Conv1st	ENSG00000158874.13	APOA2	chr1	161222289	161224305	-	2016	1200	789	3	0.503333	0	0	0	0	2.59295	0	1	1	3	0.322581	3.44343	FALSE	low_coverage
Ctrl_SERIPH1st_1	Ctrl_Conv1st	ENSG00000158882.16	TOMM40L	chr1	161225938	161233754	+	7816	6466	1350	6	21.2771	35.3548	3.84815	3.52895	0.152551	2.43682	0.716258	0.283742	149	477	0.312304	-1.74052	TRUE	partially_spliced
Ctrl_SERIPH1st_1	Ctrl_Conv1st	ENSG00000143257.14	NR1I3	chr1	161229665	161238262	-	8597	3361	5236	6	0	0	0	0	0	0	0	1	1	1	0.909091	0	FALSE	low_coverage
Ctrl_SERIPH1st_1	Ctrl_Conv1st	ENSG00000248485.3	PCP4L1	chr1	161258135	161285450	+	27315	1937	25300	2	0.147135	0	0	0	0	1.3053	0	1	1	2	0.47619	0.430532	FALSE	low_coverage
Ctrl_SERIPH1st_1	Ctrl_Conv1st	ENSG00000158887.21	MPZ	chr1	161304734	161309968	-	5234	2150	3084	4	1.80651	0	0	0	0	4.25286	0	1	1	14	0.070922	4.68673	TRUE	mature_mRNA_like
Ctrl_SERIPH1st_1	Ctrl_Conv1st	ENSG00000143252.18	SDHC	chr1	161314380	161363206	+	48826	2123	46703	11	163.308	11.1213	2.75742	2.24234	0.0165944	5.83762	0.809263	0.190737	850	1601	0.530885	1.59642	TRUE	mature_mRNA_like
Ctrl_SERIPH1st_1	Ctrl_Conv1st	ENSG00000188931.5	CFAP126	chr1	161364732	161367885	-	3153	783	2370	4	0	0	0.254852	0	0.718193	-1.82722	0.917683	0.0823172	0	2	0	-2.88587	FALSE	low_coverage
Ctrl_SERIPH1st_1	Ctrl_Conv1st	ENSG00000143226.17	FCGR2A	chr1	161505414	161524013	+	18599	5494	13105	9	0.21478	0	0	0	0	1.65434	0	1	1	4	0.243902	0.624073	FALSE	low_coverage
Ctrl_SERIPH1st_1	Ctrl_Conv1st	ENSG00000173110.8	HSPA6	chr1	161524539	161526894	+	2355	2355			0.384713	0.384713							0	3	0	-3.78816	FALSE	low_coverage
Ctrl_SERIPH1st_1	Ctrl_Conv1st	ENSG00000203747.14	FCGR3A	chr1	161541758	161550968	-	9210	5099	4071	7	0	0	0	0	0	0	0	1	0	0	0	0	FALSE	low_coverage
Ctrl_SERIPH1st_1	Ctrl_Conv1st	ENSG00000244682.8	FCGR2C	chr1	161581338	161605662	+	24324	3141	21165	12	0	0	0	0	0	0	0	1	0	0	0	0	FALSE	low_coverage
Ctrl_SERIPH1st_1	Ctrl_Conv1st	ENSG00000162747.14	FCGR3B	chr1	161623195	161631963	-	8768	2802	5944	4	0	0	0	0	0	0	0	1	0	0	0	0	FALSE	low_coverage
Ctrl_SERIPH1st_1	Ctrl_Conv1st	ENSG00000072694.23	FCGR2B	chr1	161662802	161679490	+	16688	7790	8857	4	0	0	0	0	0	0	0	1	0	0	0	0	FALSE	low_coverage
Ctrl_SERIPH1st_1	Ctrl_Conv1st	ENSG00000293173.2	RPL31P11	chr1	161683694	161702299	-	18605	1605	17000	1	0	0	0	0	0	0			0	0	0	0	FALSE	low_coverage
Ctrl_SERIPH1st_1	Ctrl_Conv1st	ENSG00000132185.19	FCRLA	chr1	161706957	161714352	+	7395	3289	4106	3	0	0	0	0	0	0	0	1	1	1	0.909091	0	FALSE	low_coverage
Ctrl_SERIPH1st_1	Ctrl_Conv1st	ENSG00000162746.15	FCRLB	chr1	161721543	161728143	+	6600	2611	3896	5	0.574493	0	0	0	0	2.7538	0	1	1	6	0.163934	3.10026	FALSE	low_coverage
Ctrl_SERIPH1st_1	Ctrl_Conv1st	ENSG00000226889.5	ATF6-DT	chr1	161748536	161766488	-	17952	4621	13331	6	2.67128	0	0.350161	0.0545125	0.112179	2.62204	0.782614	0.217386	0	57	0	2.20789	TRUE	mature_mRNA_like
Ctrl_SERIPH1st_1	Ctrl_Conv1st	ENSG00000081721.13	DUSP12	chr1	161749757	161757238	+	7481	1866	5531	6	43.1377	38.7817	5.70024	2.75395	0.116479	2.89811	0.695155	0.304845	129	379	0.34028	-0.977672	TRUE	mature_mRNA_like
Ctrl_SERIPH1st_1	Ctrl_Conv1st	ENSG00000118217.8	ATF6	chr1	161766260	161977574	+	211314	14300	196942	22	28.5429	74.6717	1.65769	1.62812	0.0547081	4.02643	0.304737	0.695263	721	2457	0.293435	-0.145104	TRUE	mature_mRNA_like
Ctrl_SERIPH1st_1	Ctrl_Conv1st	ENSG00000162745.11	OLFML2B	chr1	161983191	162023869	-	40678	3430	37248	7	4.25802	4.19876	0.337897	0.331686	0.0719556	3.31501	0.402382	0.597618	6	91	0.0658617	0.094702	TRUE	mature_mRNA_like
Ctrl_SERIPH1st_1	Ctrl_Conv1st	ENSG00000198929.14	NOS1AP	chr1	162069690	162370475	+	300785	7854	292931	11	6.58709	9.39175	0.996644	1.09223	0.129708	2.60828	0.485221	0.514779	49	1149	0.0426421	0.232094	TRUE	mature_mRNA_like
Ctrl_SERIPH1st_1	Ctrl_Conv1st	ENSG00000171722.14	SPATA46	chr1	162373202	162376874	-	3672	1925	1747	2	0	0	0	0	0	0	0	1	0	0	0	0	FALSE	low_coverage
Ctrl_SERIPH1st_1	Ctrl_Conv1st	ENSG00000239887.6	C1orf226	chr1	162378840	162386812	+	7972	4313	3659	2	12.1206	7.24644	2.2282	1.83613	0.154214	2.39202	0.427565	0.572435	12	207	0.057943	2.30159	TRUE	unclassified
Ctrl_SERIPH1st_1	Ctrl_Conv1st	ENSG00000198574.7	SH2D1B	chr1	162395267	162412138	-	16871	2795	14076	3	0	0	0.021455	0	0.17665	-0.280422	0.544692	0.455308	0	1	0	0.675111	FALSE	low_coverage
Ctrl_SERIPH1st_1	Ctrl_Conv1st	ENSG00000152332.17	UHMK1	chr1	162497250	162529631	+	32381	9248	23133	7	51.4181	64.1781	2.49125	3.12789	0.0461262	4.31336	0.563052	0.436948	202	1779	0.113541	1.70829	TRUE	mature_mRNA_like
Ctrl_SERIPH1st_1	Ctrl_Conv1st	ENSG00000259788.2	UAP1-DT	chr1	162529889	162561422	-	31533	3647	27886	6	0.165616	0	0.0362907	0	0.120205	0.962653	0.239459	0.760541	0	6	0	-0.336991	FALSE	low_coverage
Ctrl_SERIPH1st_1	Ctrl_Conv1st	ENSG00000117143.15	UAP1	chr1	162561480	162601259	+	39779	5629	34150	10	44.685	72.4392	3.06135	2.20033	0.0639828	3.82441	0.578841	0.421159	406	1189	0.341435	0.288569	TRUE	mature_mRNA_like
Ctrl_SERIPH1st_1	Ctrl_Conv1st	ENSG00000162733.20	DDR2	chr1	162630862	162787405	+	156543	12119	144424	23	0.61911	0.863669	0.147856	0.000858	0.170544	1.53671	0.918006	0.0819936	14	97	0.144181	0.7029	FALSE	low_coverage
Ctrl_SERIPH1st_1	Ctrl_Conv1st	ENSG00000132196.17	HSD17B7	chr1	162790701	162812823	+	22122	4829	17293	10	8.15614	6.93284	1.60261	0.965261	0.162557	2.27772	0.582483	0.417517	55	224	0.245426	-0.00834354	TRUE	partially_spliced
Ctrl_SERIPH1st_1	Ctrl_Conv1st	ENSG00000185860.15	CCDC190	chr1	162824457	162868957	-	44500	6057	38443	5	0.0498595	0	0	0	0	0.58361	0	1	0	1	0	0	FALSE	low_coverage
Ctrl_SERIPH1st_1	Ctrl_Conv1st	ENSG00000117152.14	RGS4	chr1	163068774	163076802	+	8028	4729	3297	5	0.520194	0.362288	0.0703672	0	0.101898	1.86407	0.519017	0.480983	3	9	0.32967	2.47105	FALSE	low_coverage
Ctrl_SERIPH1st_1	Ctrl_Conv1st	ENSG00000143248.14	RGS5	chr1	163111120	163321791	-	210671	6657	204014	12	2.29232	4.93033	1.29996	0.361565	0.352075	0.773027	1.21885	-0.218855	17	936	0.0181605	-2.98752	TRUE	unclassified
Ctrl_SERIPH1st_1	Ctrl_Conv1st	ENSG00000232892.2	RGS5-AS1	chr1	163161674	163213023	+	51349	2888	48461	4	0	0	0	0	0	0	0	1	0	0	0	0	FALSE	low_coverage
Ctrl_SERIPH1st_1	Ctrl_Conv1st	ENSG00000143228.14	NUF2	chr1	163266575	163355766	+	89191	3448	85743	17	30.9084	31.6874	1.32395	3.35456	0.0409481	4.44469	0.640794	0.359206	256	734	0.348726	5.86345	TRUE	mature_mRNA_like
Ctrl_SERIPH1st_1	Ctrl_Conv1st	ENSG00000185630.20	PBX1	chr1	164555583	164899296	+	343713	23367	320346	29	20.796	3.56682	1.60572	1.59658	0.0713599	3.61477	0.73437	0.26563	326	3336	0.0977189	0.471467	TRUE	mature_mRNA_like
Ctrl_SERIPH1st_1	Ctrl_Conv1st	ENSG00000233693.1	PBX1-AS1	chr1	164769115	164774641	-	5526	1963	3563	3	0	0	0	0	0	0	0	1	0	0	0	0	FALSE	low_coverage
Ctrl_SERIPH1st_1	Ctrl_Conv1st	ENSG00000162761.14	LMX1A	chr1	165201866	165356715	-	154849	4185	150664	12	0	0	0	0	0	0	0	1	0	0	0	0	FALSE	low_coverage
Ctrl_SERIPH1st_1	Ctrl_Conv1st	ENSG00000224702.1	LMX1A-AS2	chr1	165210626	165213090	+	2464	692	1772	2	0	0	0	0	0	0	0	1	0	0	0	0	FALSE	low_coverage
Ctrl_SERIPH1st_1	Ctrl_Conv1st	ENSG00000238022.3	LMX1A-AS1	chr1	165215932	165219104	+	3172	803	2273	1	0	0	0	0	0	0			0	0	0	0	FALSE	low_coverage
Ctrl_SERIPH1st_1	Ctrl_Conv1st	ENSG00000143171.14	RXRG	chr1	165400921	165445355	-	44434	2691	41743	11	0.40877	0.130631	0.111109	0	0.179242	1.26903	0.512121	0.487879	3	19	0.157068	-0.738757	FALSE	low_coverage
Ctrl_SERIPH1st_1	Ctrl_Conv1st	ENSG00000237463.8	LRRC52-AS1	chr1	165450146	165582155	-	132009	7925	123909	25	0	0	0	0	0	0	0	1	0	0	0	0	FALSE	low_coverage
Ctrl_SERIPH1st_1	Ctrl_Conv1st	ENSG00000162763.4	LRRC52	chr1	165543999	165563957	+	19958	1372	18586	1	0	0	0	0	0	0			0	0	0	0	FALSE	low_coverage
Ctrl_SERIPH1st_1	Ctrl_Conv1st	ENSG00000143198.14	MGST3	chr1	165630873	165661796	+	30923	12017	18790	11	13.3879	4.77615	2.27073	2.12992	0.144095	2.50826	0.729334	0.270666	385	682	0.564433	0.76219	TRUE	mature_mRNA_like
Ctrl_SERIPH1st_1	Ctrl_Conv1st	ENSG00000143149.14	ALDH9A1	chr1	165662215	165698597	-	36382	3042	33340	10	106.412	111.574	1.59025	1.64863	0.0147106	5.97763	0.408678	0.591322	649	1256	0.516679	1.7995	TRUE	mature_mRNA_like
Ctrl_SERIPH1st_1	Ctrl_Conv1st	ENSG00000143183.19	TMCO1	chr1	165724292	165827755	-	103463	5512	97951	12	65.2954	52.8127	0.751355	0.83468	0.0113589	6.26328	0.898579	0.101421	567	1446	0.392089	6.36631	TRUE	mature_mRNA_like
Ctrl_SERIPH1st_1	Ctrl_Conv1st	ENSG00000224358.1	TMCO1-AS1	chr1	165768928	165775176	+	6248	2150	4098	1	7.91535	7.59265	3.57272	3.57272	0.30831	1.12592			1	108	0.00925069	0.513884	TRUE	unclassified
Ctrl_SERIPH1st_1	Ctrl_Conv1st	ENSG00000143179.17	UCK2	chr1	165827585	165911618	+	84033	7012	77021	11	116.288	45.8478	8.55568	6.59218	0.0684763	3.74915	0.721854	0.278146	637	4922	0.129416	1.65393	TRUE	mature_mRNA_like
Ctrl_SERIPH1st_1	Ctrl_Conv1st	ENSG00000188859.7	FAM78B	chr1	166057425	166167001	-	109576	5719	103857	2	0.633677	1.26143	0.377057	0.332834	0.339466	0.620984	0.122547	0.877453	1	142	0.0070373	-1.22078	TRUE	unclassified
Ctrl_SERIPH1st_1	Ctrl_Conv1st	ENSG00000203307.2	FAM78B-AS1	chr1	166081182	166087483	+	6301	594	5707	2	0	0	0.0529178	0.034673	0.346054	-0.612756	0.257461	0.742539	0	1	0	1.37671	FALSE	low_coverage
Ctrl_SERIPH1st_1	Ctrl_Conv1st	ENSG00000290604.2	FMO9P	chr1	166598993	166625243	+	26250	1415	24835	7	0	0	0	0	0	0	0	1	0	0	0	0	FALSE	low_coverage
Ctrl_SERIPH1st_1	Ctrl_Conv1st	ENSG00000143157.13	POGK	chr1	166839313	166860347	+	21034	10293	10741	4	50.6514	64.4629	8.53012	8.46099	0.143892	2.556	0.692656	0.307344	173	2044	0.0846338	-1.04245	TRUE	mature_mRNA_like
Ctrl_SERIPH1st_1	Ctrl_Conv1st	ENSG00000152382.7	TADA1	chr1	166856509	166876360	-	19851	3038	16813	7	35.9819	59.6073	5.99405	3.16622	0.142458	2.5658	0.48179	0.51821	200	701	0.285266	0.827139	TRUE	mature_mRNA_like
Ctrl_SERIPH1st_1	Ctrl_Conv1st	ENSG00000143195.14	ILDR2	chr1	166895710	166975540	-	79830	13946	65802	11	4.48767	5.50817	0.420094	0.353079	0.0838886	3.14092	0.710588	0.289412	20	300	0.0666445	1.77104	TRUE	mature_mRNA_like
Ctrl_SERIPH1st_1	Ctrl_Conv1st	ENSG00000143194.13	MAEL	chr1	166975581	167022214	+	46633	3148	43390	13	0.0959339	0	0.0486978	0	0.199066	0.397983	0.374184	0.625816	0	8	0	-1.04601	FALSE	low_coverage
Ctrl_SERIPH1st_1	Ctrl_Conv1st	ENSG00000143167.13	GPA33	chr1	167048288	167166479	-	118191	5169	113022	16	0	0	0	0	0	0	0	1	0	0	0	0	FALSE	low_coverage
Ctrl_SERIPH1st_1	Ctrl_Conv1st	ENSG00000198842.10	STYXL2	chr1	167094074	167129165	+	35091	4274	30817	6	0	0	0	0	0	0	0	1	0	0	0	0	FALSE	low_coverage
Ctrl_SERIPH1st_1	Ctrl_Conv1st	ENSG00000272205.3	POU2F1-DT	chr1	167203893	167222321	-	18428	3083	15345	3	1.87577	0	0.075269	0.023346	0.036698	3.49477	0.950238	0.0497618	0	23	0	-3.70068	TRUE	mature_mRNA_like
Ctrl_SERIPH1st_1	Ctrl_Conv1st	ENSG00000143190.24	POU2F1	chr1	167220875	167427345	+	206470	16031	190439	28	42.7227	18.7349	1.98935	1.63893	0.0443931	4.35725	0.744531	0.255469	517	3551	0.145589	1.87523	TRUE	mature_mRNA_like
Ctrl_SERIPH1st_1	Ctrl_Conv1st	ENSG00000198821.13	CD247	chr1	167425026	167518640	-	93614	9361	84253	15	0.0669799	0	0.0319754	0	0.160716	0.339406	1.14858	-0.148576	1	11	0.0900901	0.256054	FALSE	low_coverage
Ctrl_SERIPH1st_1	Ctrl_Conv1st	ENSG00000143162.10	CREG1	chr1	167529116	167553822	-	24706	3303	21403	5	49.5849	80.3835	1.5773	0.626001	0.0307693	4.88859	1.10055	-0.100546	206	660	0.312074	-5.04288	TRUE	mature_mRNA_like
Ctrl_SERIPH1st_1	Ctrl_Conv1st	ENSG00000198771.12	RCSD1	chr1	167629659	167708706	+	79047	8326	70625	12	0.0362719	0	0.0171044	0	0.111519	0.218693	0.322499	0.677501	2	7	0.28169	-0.154423	FALSE	low_coverage
Ctrl_SERIPH1st_1	Ctrl_Conv1st	ENSG00000197965.13	MPZL1	chr1	167721191	167791919	+	70728	7156	63572	10	97.4786	29.8522	3.58384	3.31029	0.0354266	4.72728	0.834493	0.165507	481	3090	0.155658	2.98472	TRUE	mature_mRNA_like
Ctrl_SERIPH1st_1	Ctrl_Conv1st	ENSG00000143199.18	ADCY10	chr1	167809385	167914215	-	104830	6141	98516	32	0.336427	0	0.072374	0	0.142244	1.3402	0.640283	0.359717	2	32	0.0623053	-1.23723	FALSE	low_coverage
Ctrl_SERIPH1st_1	Ctrl_Conv1st	ENSG00000143158.12	MPC2	chr1	167916674	167937502	-	20828	3472	17268	5	36.3223	117.118	1.67199	1.99012	0.043891	4.36138	0.644216	0.355784	248	520	0.476831	0.00199882	TRUE	mature_mRNA_like
Ctrl_SERIPH1st_1	Ctrl_Conv1st	ENSG00000143164.17	DCAF6	chr1	167935782	168076223	+	140441	6750	133642	26	33.7693	32.5253	1.68764	1.28752	0.0474631	4.24385	0.685462	0.314538	487	1516	0.321219	0.507923	TRUE	mature_mRNA_like
Ctrl_SERIPH1st_1	Ctrl_Conv1st	ENSG00000143147.16	GPR161	chr1	168079541	168137685	-	58144	16614	41530	10	8.94511	3.5679	1.83063	1.50487	0.168322	2.22807	0.461346	0.538654	39	750	0.0519931	1.71044	TRUE	unclassified
Ctrl_SERIPH1st_1	Ctrl_Conv1st	ENSG00000143155.14	TIPRL	chr1	168178917	168202114	+	23197	3239	19958	7	66.2603	123.312	2.12842	2.80022	0.031077	4.89623	0.562575	0.437425	351	860	0.408092	0.052964	TRUE	mature_mRNA_like
Ctrl_SERIPH1st_1	Ctrl_Conv1st	ENSG00000213064.11	SFT2D2	chr1	168225937	168253021	+	27084	11217	15780	7	83.5177	108.944	4.16654	3.5279	0.0474634	4.29267	0.656657	0.343343	244	3342	0.073008	3.05429	TRUE	mature_mRNA_like
Ctrl_SERIPH1st_1	Ctrl_Conv1st	ENSG00000293109.1	ANKRD36BP1	chr1	168245564	168247343	-	1779	1779			0	0							0	0	0	0	FALSE	low_coverage
Ctrl_SERIPH1st_1	Ctrl_Conv1st	ENSG00000143178.13	TBX19	chr1	168280876	168314426	+	33550	3810	29740	7	1.92336	1.88566	0.514122	0.509629	0.202611	1.72015	0.422916	0.577084	5	79	0.0632111	0.501818	TRUE	unclassified
Ctrl_SERIPH1st_1	Ctrl_Conv1st	ENSG00000143185.4	XCL2	chr1	168540767	168543997	-	3230	562	2668	2	0	0	0	0	0	0	0	1	0	0	0	0	FALSE	low_coverage
Ctrl_SERIPH1st_1	Ctrl_Conv1st	ENSG00000143184.5	XCL1	chr1	168576604	168582069	+	5465	1227	4238	2	3.62266	4.39362	1.3537	0.980587	0.266668	1.3566	0.587689	0.412311	17	40	0.42394	0.561777	TRUE	partially_spliced
Ctrl_SERIPH1st_1	Ctrl_Conv1st	ENSG00000143196.6	DPT	chr1	168695456	168729206	-	33750	1781	31969	4	0	0	0	0	0	0	0	1	0	0	0	0	FALSE	low_coverage
Ctrl_SERIPH1st_1	Ctrl_Conv1st	ENSG00000143153.15	ATP1B1	chr1	169105696	169310992	+	205296	12352	192944	14	11.2923	1.72603	0.1865	0.94031	0.016107	5.31339	0.782346	0.217654	160	586	0.272991	-4.87976	TRUE	mature_mRNA_like
Ctrl_SERIPH1st_1	Ctrl_Conv1st	ENSG00000143156.15	NME7	chr1	169132530	169367948	-	235418	5718	229700	15	10.8727	21.5414	0.911781	0.517735	0.0767204	3.43895	0.649128	0.350872	187	907	0.206151	-0.013818	TRUE	mature_mRNA_like
Ctrl_SERIPH1st_1	Ctrl_Conv1st	ENSG00000117475.15	BLZF1	chr1	169367969	169396540	+	28571	5750	22724	8	18.7553	27.6162	3.44389	3.19426	0.15444	2.41156	0.508944	0.491056	172	623	0.276039	0.0989021	TRUE	partially_spliced
Ctrl_SERIPH1st_1	Ctrl_Conv1st	ENSG00000117477.14	CCDC181	chr1	169394869	169460669	-	65800	6298	59502	10	3.54144	2.73797	0.541898	0.412859	0.129537	2.50409	0.729789	0.270211	14	186	0.0752284	2.52121	TRUE	mature_mRNA_like
Ctrl_SERIPH1st_1	Ctrl_Conv1st	ENSG00000117479.16	SLC19A2	chr1	169463908	169485944	-	22036	4364	17672	4	30.3041	27.9439	6.05212	6.1554	0.166011	2.30511	0.24657	0.75343	111	798	0.13908	1.13828	TRUE	partially_spliced
Ctrl_SERIPH1st_1	Ctrl_Conv1st	ENSG00000198734.13	F5	chr1	169511950	169586588	-	74638	9373	65265	24	0.0322202	0	0	0	0	0.402943	0	1	0	1	0	0	FALSE	low_coverage
Ctrl_SERIPH1st_1	Ctrl_Conv1st	ENSG00000174175.18	SELP	chr1	169588420	169630193	-	41773	4459	37314	15	0	0	0	0	0	0	0	1	0	0	0	0	FALSE	low_coverage
Ctrl_SERIPH1st_1	Ctrl_Conv1st	ENSG00000000460.18	FIRRM	chr1	169662006	169855456	+	193450	8061	185389	34	26.6235	39.1333	1.00312	1.34814	0.0361791	4.59844	1.58721	-0.587205	510	1345	0.379154	5.56928	TRUE	mature_mRNA_like
Ctrl_SERIPH1st_1	Ctrl_Conv1st	ENSG00000188404.11	SELL	chr1	169690664	169712202	-	21538	3070	18468	10	0.393485	0	0.0162985	0	0.0319713	2.08517	0.312565	0.687435	0	5	0	0.846923	FALSE	low_coverage
Ctrl_SERIPH1st_1	Ctrl_Conv1st	ENSG00000007908.16	SELE	chr1	169722639	169764705	-	42066	4586	37480	14	0	0	0	0	0	0	0	1	0	0	0	0	FALSE	low_coverage
Ctrl_SERIPH1st_1	Ctrl_Conv1st	ENSG00000171806.13	METTL18	chr1	169792528	169794991	-	2463	2217	179	1	13.1592	9.2243	0.072626	0.072626	0.00544756	6.2632			11	99	0.110999	1.50027	TRUE	mature_mRNA_like
Ctrl_SERIPH1st_1	Ctrl_Conv1st	ENSG00000000457.15	SCYL3	chr1	169846980	169894267	-	47287	7840	39439	17	6.64196	9.50711	1.7592	1.51369	0.206936	1.85849	0.555399	0.444601	74	408	0.181328	0.687575	TRUE	partially_spliced
Ctrl_SERIPH1st_1	Ctrl_Conv1st	ENSG00000075945.13	KIFAP3	chr1	169921325	170085208	-	163883	4978	158905	22	26.7384	39.5794	0.84054	0.641958	0.0303674	4.83467	0.634765	0.365235	317	893	0.354943	0.139196	TRUE	mature_mRNA_like
Ctrl_SERIPH1st_1	Ctrl_Conv1st	ENSG00000232959.1	KIFAP3-AS1	chr1	170024076	170024683	+	607	341	266	1	0	0	0	0	0	0			0	0	0	0	FALSE	low_coverage
Ctrl_SERIPH1st_1	Ctrl_Conv1st	ENSG00000203740.5	NTMT2	chr1	170145958	170168866	+	22908	2322	20586	5	0.695091	0.644535	0.155931	0.136414	0.163962	1.63536	0.53676	0.46324	0	16	0	0.441472	FALSE	low_coverage
Ctrl_SERIPH1st_1	Ctrl_Conv1st	ENSG00000231407.7	GORAB-AS1	chr1	170460451	170538383	-	77932	6765	71167	13	0.333925	0	0.0720277	0	0.142361	1.3348	2.19042	-1.19042	0	25	0	-2.01058	FALSE	low_coverage
Ctrl_SERIPH1st_1	Ctrl_Conv1st	ENSG00000120370.14	GORAB	chr1	170531818	170553834	+	22016	11246	10770	5	4.32474	3.65533	1.68747	2.18296	0.276081	1.30768	0.712608	0.287392	30	223	0.134469	-0.513088	TRUE	partially_spliced
Ctrl_SERIPH1st_1	Ctrl_Conv1st	ENSG00000116132.12	PRRX1	chr1	170662727	170739421	+	76694	8248	68349	6	0.701988	0.266214	0.208869	0.258486	0.206626	1.37658	0.591578	0.408422	1	67	0.0149031	0.358022	FALSE	low_coverage
Ctrl_SERIPH1st_1	Ctrl_Conv1st	ENSG00000231424.4	FMO1-AS1	chr1	170748572	171251857	-	503285	9616	493669	17	0.252184	0	0.276546	0.273551	0.439848	-0.0964949	0.688052	0.311948	4	466	0.00858185	-1.91183	FALSE	low_coverage
Ctrl_SERIPH1st_1	Ctrl_Conv1st	ENSG00000117501.16	MROH9	chr1	170935428	171064765	+	129337	3873	125464	22	0	0	0	0	0	0	0	1	0	0	0	0	FALSE	low_coverage
Ctrl_SERIPH1st_1	Ctrl_Conv1st	ENSG00000007933.14	FMO3	chr1	171085112	171118675	+	33563	5610	27927	12	0.0538324	0	0	0	0	0.62136	0	1	0	1	0	0.378452	FALSE	low_coverage
Ctrl_SERIPH1st_1	Ctrl_Conv1st	ENSG00000293458.1	FMO6P	chr1	171137739	171161568	+	23829	2530	21295	7	0	0	0	0	0	0	0	1	0	0	0	0	FALSE	low_coverage
Ctrl_SERIPH1st_1	Ctrl_Conv1st	ENSG00000094963.15	FMO2	chr1	171185248	171212686	+	27438	6278	21073	8	0	0	0	0	0	0	0	1	0	0	0	0	FALSE	low_coverage
Ctrl_SERIPH1st_1	Ctrl_Conv1st	ENSG00000010932.17	FMO1	chr1	171248470	171285978	+	37508	3602	33906	10	0.127152	0	0.00430601	0	0.0186039	1.12283	0.146439	0.853561	2	2	0.952381	0.492626	FALSE	low_coverage
Ctrl_SERIPH1st_1	Ctrl_Conv1st	ENSG00000076258.11	FMO4	chr1	171314090	171343741	+	29651	4341	25310	10	3.77471	3.68532	1.0529	1.00817	0.213674	1.74881	0.58896	0.41104	21	144	0.145732	0.904203	TRUE	partially_spliced
Ctrl_SERIPH1st_1	Ctrl_Conv1st	ENSG00000117523.18	PRRC2C	chr1	171485529	171593511	+	107982	14189	93793	34	220.234	320.991	5.33372	4.20712	0.0236353	5.34161	0.778184	0.221816	5246	12113	0.433085	1.57152	TRUE	mature_mRNA_like
Ctrl_SERIPH1st_1	Ctrl_Conv1st	ENSG00000283683.2	MYOCOS	chr1	171600620	171638799	+	38179	3180	34999	7	0.00691823	0	0.0684022	0	0.390155	-0.655403	0.920666	0.0793344	1	9	0.10989	-0.757663	FALSE	low_coverage
Ctrl_SERIPH1st_1	Ctrl_Conv1st	ENSG00000034971.18	MYOC	chr1	171635416	171652688	-	17272	2275	14997	4	0	0	0	0	0	0	0	1	0	0	0	0	FALSE	low_coverage
Ctrl_SERIPH1st_1	Ctrl_Conv1st	ENSG00000117533.16	VAMP4	chr1	171700159	171743206	-	43047	5370	37677	8	9.0702	29.525	1.08525	1.00752	0.105822	2.95176	0.668718	0.331282	70	300	0.233256	1.46811	TRUE	mature_mRNA_like
Ctrl_SERIPH1st_1	Ctrl_Conv1st	ENSG00000010165.21	METTL13	chr1	171781659	171814023	+	32364	3831	28533	8	61.721	62.9039	2.41661	2.88289	0.0376198	4.61855	0.813035	0.186965	303	1017	0.297906	-5.8064	TRUE	mature_mRNA_like
Ctrl_SERIPH1st_1	Ctrl_Conv1st	ENSG00000197959.15	DNM3	chr1	171817886	172418466	+	600580	11851	588729	26	2.35043	5.14546	0.338468	0.278838	0.121362	2.48249	0.593582	0.406418	57	760	0.0749901	-0.0814541	TRUE	mature_mRNA_like
Ctrl_SERIPH1st_1	Ctrl_Conv1st	ENSG00000233540.1	DNM3-IT1	chr1	171864186	171864687	+	501	396	105	1	1.15152	0.788928	1.40952	1.40952	0.529689	-0.270418			9	11	0.810811	1.45606	TRUE	partially_spliced
Ctrl_SERIPH1st_1	Ctrl_Conv1st	ENSG00000230630.6	DNM3OS	chr1	172138396	172144840	-	6444	3195	3249	2	0	0	0	0	0	0	0	1	0	0	0	0	FALSE	low_coverage
Ctrl_SERIPH1st_1	Ctrl_Conv1st	ENSG00000135845.11	PIGC	chr1	172370188	172444148	-	73960	5291	68655	10	22.1663	1.54685	0.455859	0.241273	0.0200623	5.324	0.741414	0.258586	11	495	0.0222177	-4.17796	TRUE	mature_mRNA_like
Ctrl_SERIPH1st_1	Ctrl_Conv1st	ENSG00000180999.11	C1orf105	chr1	172420684	172468831	+	48147	1728	46419	12	0	0	0.00650598	0	0.0610856	-0.0909344	0.102558	0.897442	0	1	0	-0.273898	FALSE	low_coverage
Ctrl_SERIPH1st_1	Ctrl_Conv1st	ENSG00000094975.15	SUCO	chr1	172532348	172611833	+	79485	7893	71592	24	24.348	26.3523	1.76499	0.735001	0.0673325	3.71248	0.86681	0.13319	274	1062	0.257979	1.05165	TRUE	mature_mRNA_like
Ctrl_SERIPH1st_1	Ctrl_Conv1st	ENSG00000117560.9	FASLG	chr1	172659101	172666876	+	7775	1827	5948	3	0	0	0	0	0	0	0	1	0	0	0	0	FALSE	low_coverage
Ctrl_SERIPH1st_1	Ctrl_Conv1st	ENSG00000120337.10	TNFSF18	chr1	173039201	173050941	-	11740	2744	8996	2	0	0	0	0	0	0	0	1	0	0	0	0	FALSE	low_coverage
Ctrl_SERIPH1st_1	Ctrl_Conv1st	ENSG00000117586.13	TNFSF4	chr1	173162644	173477583	-	314939	11948	302991	17	1.17183	0.350394	0.600638	0.074399	0.320774	0.860162	1.40462	-0.404618	8	655	0.0122119	-2.6578	TRUE	unclassified
Ctrl_SERIPH1st_1	Ctrl_Conv1st	ENSG00000203739.7	PRDX6-AS1	chr1	173417788	173489407	-	71619	5247	66372	11	3.5405	1.12998	1.64229	1.11453	0.310875	1.06315	0.66224	0.33776	12	428	0.0280308	0.167558	TRUE	unclassified
Ctrl_SERIPH1st_1	Ctrl_Conv1st	ENSG00000117592.10	PRDX6	chr1	173476813	173489064	+	12251	2984	9267	6	324.985	345.785	15.0787	11.0673	0.0443277	4.4207	0.681749	0.318251	1848	3720	0.496761	2.29057	TRUE	mature_mRNA_like
Ctrl_SERIPH1st_1	Ctrl_Conv1st	ENSG00000162753.13	SLC9C2	chr1	173500459	173603072	-	102613	5123	97490	30	0	0	0.0123808	0	0.110168	-0.168395	0.422778	0.577222	0	4	0	0.477263	FALSE	low_coverage
Ctrl_SERIPH1st_1	Ctrl_Conv1st	ENSG00000183831.8	ANKRD45	chr1	173608335	173669851	-	61516	4125	57391	5	0.146424	0.582734	0	0	0	1.30114	0	1	2	2	0.952381	0.1214	FALSE	low_coverage
Ctrl_SERIPH1st_1	Ctrl_Conv1st	ENSG00000232113.3	TEX50	chr1	173635337	173637130	+	1793	812	981	1	0	0	0	0	0	0			0	0	0	0	FALSE	low_coverage
Ctrl_SERIPH1st_1	Ctrl_Conv1st	ENSG00000076321.12	KLHL20	chr1	173714918	173786820	+	71902	4547	67355	13	15.1113	11.6735	1.65219	1.50577	0.0979743	3.11791	0.867216	0.132784	83	602	0.137851	-0.209065	TRUE	mature_mRNA_like
Ctrl_SERIPH1st_1	Ctrl_Conv1st	ENSG00000120334.17	CENPL	chr1	173799549	173824883	-	25334	5282	20052	6	15.9928	19.5722	1.61615	1.43572	0.0912616	3.22917	0.670193	0.329807	43	395	0.108833	0.602754	TRUE	mature_mRNA_like
Ctrl_SERIPH1st_1	Ctrl_Conv1st	ENSG00000117593.13	DARS2	chr1	173824539	173858808	+	34269	7466	26803	14	68.0788	128.921	1.95459	1.5338	0.0278697	5.0524	0.511917	0.488083	909	1878	0.484	-0.49324	TRUE	mature_mRNA_like
Ctrl_SERIPH1st_1	Ctrl_Conv1st	ENSG00000234741.11	GAS5	chr1	173851423	173868940	-	17517	5626	11876	3	86.3793	1.70549	6.72474	3.42711	0.0721507	3.66351	0.973518	0.0264824	613	1889	0.324493	-4.84525	TRUE	mature_mRNA_like
Ctrl_SERIPH1st_1	Ctrl_Conv1st	ENSG00000270084.2	GAS5-AS1	chr1	173862472	173863941	+	1469	814	655	1	4.16339	4.94533	9.89313	9.89313	0.698839	-1.22894			0	33	0	-1.7728	TRUE	unclassified
Ctrl_SERIPH1st_1	Ctrl_Conv1st	ENSG00000185278.17	ZBTB37	chr1	173868081	173903547	+	35466	19607	15859	5	11.4522	12.6932	1.01526	0.561338	0.0807846	3.37272	0.808778	0.191222	53	803	0.0659943	1.47138	TRUE	mature_mRNA_like
Ctrl_SERIPH1st_1	Ctrl_Conv1st	ENSG00000117601.16	SERPINC1	chr1	173903518	173917543	-	14025	2573	11354	8	0.212204	0	0.00502034	0	0.0158259	1.57182	0.0722479	0.927752	1	2	0.47619	-0.642227	FALSE	low_coverage
Ctrl_SERIPH1st_1	Ctrl_Conv1st	ENSG00000135870.14	RC3H1	chr1	173931083	174022357	-	91274	12193	79081	19	39.3989	81.9276	3.30868	2.01562	0.077292	3.53453	0.69344	0.30656	733	2487	0.294721	1.38693	TRUE	mature_mRNA_like
Ctrl_SERIPH1st_1	Ctrl_Conv1st	ENSG00000236535.1	RC3H1-IT1	chr1	174009266	174016206	-	6940	448	6492	1	2.29241	3.35496	3.88524	3.88524	0.6189	-0.736203			68	155	0.438427	0.181986	TRUE	partially_spliced
Ctrl_SERIPH1st_1	Ctrl_Conv1st	ENSG00000224977.3	RC3H1-DT	chr1	174021680	174023628	+	1948	1304	644	1	0.640337	0.349665	0	0	0	2.88818			0	3	0	0	FALSE	low_coverage
Ctrl_SERIPH1st_1	Ctrl_Conv1st	ENSG00000227373.7	RABGAP1L-DT	chr1	174110267	174160394	-	50127	9524	40581	6	0.126837	0	0.0669772	0.026093	0.227957	0.442008	0.446365	0.553635	0	13	0	3.73354e-05	FALSE	low_coverage
Ctrl_SERIPH1st_1	Ctrl_Conv1st	ENSG00000152061.24	RABGAP1L	chr1	174159409	174995308	+	835899	16071	819828	41	12.2963	10.9545	0.722122	0.739538	0.0550464	3.91441	0.688417	0.311583	277	2638	0.105	-0.165551	TRUE	mature_mRNA_like
Ctrl_SERIPH1st_1	Ctrl_Conv1st	ENSG00000203737.5	GPR52	chr1	174447963	174449545	+	1582	1582			0.927307	0.927307							45	51	0.880626	3.88005	FALSE	low_coverage
Ctrl_SERIPH1st_1	Ctrl_Conv1st	ENSG00000223525.1	RABGAP1L-IT1	chr1	174896957	174897996	+	1039	737	302	1	1.48982	1.0619	0.870861	0.870861	0.35391	0.71153			6	11	0.540541	-5.13363	TRUE	partially_spliced
Ctrl_SERIPH1st_1	Ctrl_Conv1st	ENSG00000229531.7	RABGAP1L-AS1	chr1	174934946	174954277	-	19331	991	18340	5	0	0	0.046674	0	0.318216	-0.552614	0.268149	0.731851	0	3	0	-0.604811	FALSE	low_coverage
Ctrl_SERIPH1st_1	Ctrl_Conv1st	ENSG00000116161.19	CACYBP	chr1	174999162	175012027	+	12865	4627	8221	5	75.681	56.8472	5.45785	4.75833	0.0671828	3.76924	0.541259	0.458741	710	1319	0.538246	0.611064	TRUE	mature_mRNA_like
Ctrl_SERIPH1st_1	Ctrl_Conv1st	ENSG00000120333.5	MRPS14	chr1	175010788	175023432	-	12644	2674	9970	5	50.5138	16.0979	5.31023	3.81352	0.0949543	3.22577	1.25288	-0.252878	62	629	0.0985535	3.44448	TRUE	mature_mRNA_like
Ctrl_SERIPH1st_1	Ctrl_Conv1st	ENSG00000120332.18	TNN	chr1	175067508	175148075	+	80567	6317	74250	20	0	0	0.00406733	0	0.0390836	-0.0575172	0.0355895	0.964411	0	1	0	0	FALSE	low_coverage
Ctrl_SERIPH1st_1	Ctrl_Conv1st	ENSG00000235750.11	KIAA0040	chr1	175156985	175193265	-	36280	7799	28303	4	0.707398	0.014773	0.229269	0.180425	0.221159	1.29402	0.404952	0.595048	3	40	0.074813	0.727505	FALSE	low_coverage
Ctrl_SERIPH1st_1	Ctrl_Conv1st	ENSG00000116147.19	TNR	chr1	175315193	175743595	-	428402	13470	414932	22	0	0	0.000727894	0	0.00722634	-0.0104633	0.00517247	0.994828	0	1	0	0	FALSE	low_coverage
Ctrl_SERIPH1st_1	Ctrl_Conv1st	ENSG00000235628.1	TNR-IT1	chr1	175538774	175556818	-	18044	630	17414	1	0	0	0	0	0	0			0	0	0	0	FALSE	low_coverage
Ctrl_SERIPH1st_1	Ctrl_Conv1st	ENSG00000143207.22	COP1	chr1	175944827	176207510	-	262683	4521	258162	23	33.6014	33.6969	1.66993	1.38068	0.0472113	4.25105	0.438246	0.561754	328	1953	0.167938	0.0574868	TRUE	mature_mRNA_like
Ctrl_SERIPH1st_1	Ctrl_Conv1st	ENSG00000236021.5	COP1-DT	chr1	176207343	176447919	+	240576	7874	232702	14	0.804039	0	0.0536651	0	0.0560352	2.55659	1.09039	-0.0903944	0	63	0	-1.69298	FALSE	low_coverage
Ctrl_SERIPH1st_1	Ctrl_Conv1st	ENSG00000116183.11	PAPPA2	chr1	176463170	176845601	+	382431	10926	371505	25	0.138202	0	0.00486654	0	0.0200212	1.18363	0.0988952	0.901105	0	11	0	-0.000229517	FALSE	low_coverage
Ctrl_SERIPH1st_1	Ctrl_Conv1st	ENSG00000152092.18	ASTN1	chr1	176857301	177164973	-	307672	9363	298309	26	0.424757	0.08741	0.0247596	0	0.045057	2.0725	0.346728	0.653272	9	39	0.230179	0.147425	FALSE	low_coverage
Ctrl_SERIPH1st_1	Ctrl_Conv1st	ENSG00000198797.8	BRINP2	chr1	177170889	177282422	+	111533	4748	106785	9	0.190817	0	0	0	0	1.54011	0	1	1	3	0.322581	0.345688	FALSE	low_coverage
Ctrl_SERIPH1st_1	Ctrl_Conv1st	ENSG00000120341.20	SEC16B	chr1	177923955	177984303	-	60348	8361	51903	31	0.149264	0	0.0447758	0	0.152278	0.783857	1.07079	-0.0707938	3	12	0.247934	-0.169969	FALSE	low_coverage
Ctrl_SERIPH1st_1	Ctrl_Conv1st	ENSG00000254154.9	CRYZL2P-SEC16B	chr1	177928787	178038007	-	109220	492	2892	1	0.898374	0.324841	0.251729	0.251729	0.201367	1.50512			5	21	0.236967	-0.340119	TRUE	partially_spliced
Ctrl_SERIPH1st_1	Ctrl_Conv1st	ENSG00000293477.2	CRYZL2P	chr1	178006132	178037999	-	31867	9959	21908	8	0.236369	0	0.0166149	0	0.04707	1.52829	0.526894	0.473106	2	9	0.21978	-0.433621	FALSE	low_coverage
Ctrl_SERIPH1st_1	Ctrl_Conv1st	ENSG00000224687.3	RASAL2-AS1	chr1	178090676	178094444	-	3768	3410	358	2	1.98065	1.69623	1.33799	2.06466	0.391381	0.532979	0.953803	0.0461967	1	24	0.0414938	-0.606125	TRUE	unclassified
Ctrl_SERIPH1st_1	Ctrl_Conv1st	ENSG00000075391.19	RASAL2	chr1	178093767	178484147	+	390380	20508	369872	27	13.9459	28.599	1.15629	1.13142	0.0760604	3.48291	0.650268	0.349732	318	2387	0.133216	0.589452	TRUE	mature_mRNA_like
Ctrl_SERIPH1st_1	Ctrl_Conv1st	ENSG00000188585.10	CLEC20A	chr1	178479239	178499634	-	20395	3375	17020	12	0	0	0	0	0	0	0	1	0	0	0	0	FALSE	low_coverage
Ctrl_SERIPH1st_1	Ctrl_Conv1st	ENSG00000240021.10	TEX35	chr1	178513108	178548602	+	35494	4007	31407	14	0.729723	0	0.727131	0	0.467051	0.00451415	2.04768	-1.04768	1	91	0.0109769	4.65483	TRUE	unclassified
Ctrl_SERIPH1st_1	Ctrl_Conv1st	ENSG00000213057.5	C1orf220	chr1	178542751	178548889	+	6138	2775	3363	3	5.34559	6.10893	3.4942	3.9563	0.39086	0.599416	0.380131	0.619869	1	93	0.0107411	0.665226	TRUE	pre_mRNA_like
Ctrl_SERIPH1st_1	Ctrl_Conv1st	ENSG00000273062.1	RALGPS2-AS1	chr1	178724305	178726285	-	1980	1980			2.68131	2.68131							0	18	0	1.70403	TRUE	unclassified
Ctrl_SERIPH1st_1	Ctrl_Conv1st	ENSG00000116191.20	RALGPS2	chr1	178725164	178921842	+	196678	9445	187233	20	20.3549	28.3214	0.989617	0.764494	0.0461478	4.23055	0.482949	0.517051	250	1258	0.198712	1.46264	TRUE	mature_mRNA_like
Ctrl_SERIPH1st_1	Ctrl_Conv1st	ENSG00000116194.14	ANGPTL1	chr1	178849534	178872204	-	22670	5217	17453	7	0.115775	0	0	0	0	1.10953	0	1	0	2	0	0.916938	FALSE	low_coverage
Ctrl_SERIPH1st_1	Ctrl_Conv1st	ENSG00000116199.13	FAM20B	chr1	179025803	179076567	+	50764	6622	44107	8	73.4838	92.8104	2.33802	1.90899	0.0307951	4.91561	0.525148	0.474852	331	1968	0.168183	3.33958	TRUE	mature_mRNA_like
Ctrl_SERIPH1st_1	Ctrl_Conv1st	ENSG00000186283.15	TOR3A	chr1	179081853	179098023	+	16170	3494	12676	7	56.5323	44.8915	4.98162	4.49968	0.0808521	3.47827	0.770509	0.229491	251	869	0.288805	-0.0149722	TRUE	mature_mRNA_like
Ctrl_SERIPH1st_1	Ctrl_Conv1st	ENSG00000143322.22	ABL2	chr1	179099329	179229684	-	130355	16676	113679	12	36.6953	47.8472	2.17593	1.77546	0.0558344	4.01499	0.315601	0.684399	320	2874	0.111339	2.30681	TRUE	mature_mRNA_like
Ctrl_SERIPH1st_1	Ctrl_Conv1st	ENSG00000057252.14	SOAT1	chr1	179293439	179358680	+	65241	7802	57439	20	42.5504	65.0185	1.19546	0.947916	0.0272651	5.04102	0.592356	0.407644	489	1338	0.365444	2.15777	TRUE	mature_mRNA_like
Ctrl_SERIPH1st_1	Ctrl_Conv1st	ENSG00000162779.22	AXDND1	chr1	179365719	179554735	+	189016	6089	182927	29	0.237313	0	0.023441	0	0.0649778	1.45027	0.664353	0.335647	4	19	0.209424	-0.41984	FALSE	low_coverage
Ctrl_SERIPH1st_1	Ctrl_Conv1st	ENSG00000116218.14	NPHS2	chr1	179550493	179575952	-	25459	1919	23540	7	0	0	0	0	0	0	0	1	0	0	0	0	FALSE	low_coverage
Ctrl_SERIPH1st_1	Ctrl_Conv1st	ENSG00000162782.17	TDRD5	chr1	179591612	179691272	+	99660	4440	95220	16	0.731757	0.238806	0.0443184	0.001414	0.0505874	2.52691	0.295019	0.704981	10	25	0.398406	0.303203	FALSE	low_coverage
Ctrl_SERIPH1st_1	Ctrl_Conv1st	ENSG00000143340.8	FAM163A	chr1	179743290	179817055	+	73765	3965	69800	4	0.228499	0	0.0778796	0	0.191643	0.884988	0.302471	0.697529	0	21	0	0	FALSE	low_coverage
Ctrl_SERIPH1st_1	Ctrl_Conv1st	ENSG00000169905.14	TOR1AIP2	chr1	179839966	179883034	-	43068	19439	23629	11	53.8281	62.7949	4.57561	4.94727	0.0782105	3.52781	0.698078	0.301922	297	3857	0.0770009	2.15028	TRUE	mature_mRNA_like
Ctrl_SERIPH1st_1	Ctrl_Conv1st	ENSG00000143337.19	TOR1AIP1	chr1	179882041	179920077	+	38036	4692	33344	14	49.0448	88.4737	1.55764	1.60213	0.0307213	4.88983	1.07022	-0.0702154	291	940	0.309542	1.14264	TRUE	mature_mRNA_like
Ctrl_SERIPH1st_1	Ctrl_Conv1st	ENSG00000135837.19	CEP350	chr1	179954673	180114880	+	160207	30098	130020	43	22.4718	31.731	2.16897	1.12392	0.0876681	3.31441	0.723883	0.276117	1076	3203	0.335925	0.497349	TRUE	mature_mRNA_like
Ctrl_SERIPH1st_1	Ctrl_Conv1st	ENSG00000116260.17	QSOX1	chr1	180154868	180204030	+	49162	9276	39886	11	15.9017	39.8099	2.30632	1.71311	0.125973	2.73332	0.838103	0.161897	238	797	0.298582	1.32866	TRUE	mature_mRNA_like
Ctrl_SERIPH1st_1	Ctrl_Conv1st	ENSG00000121454.7	LHX4	chr1	180230187	180278984	+	48797	6161	42636	5	6.5986	5.0108	1.08324	0.785225	0.139201	2.50112	0.530106	0.469894	16	290	0.0551534	1.69832	TRUE	mature_mRNA_like
Ctrl_SERIPH1st_1	Ctrl_Conv1st	ENSG00000230124.9	ACBD6	chr1	180269652	180502954	-	233302	8363	224939	17	31.6218	23.3023	2.74661	2.61658	0.0796849	3.47816	1.13683	-0.136827	348	2956	0.117723	0.519351	TRUE	mature_mRNA_like
Ctrl_SERIPH1st_1	Ctrl_Conv1st	ENSG00000236719.6	OVAAL	chr1	180509379	180566523	+	57144	2957	54100	9	0	0	0	0	0	0	0	1	0	0	0	0	FALSE	low_coverage
Ctrl_SERIPH1st_1	Ctrl_Conv1st	ENSG00000143324.15	XPR1	chr1	180632015	180890279	+	258264	8946	249318	15	40.3214	71.7325	0.850492	0.862857	0.0206071	5.4103	0.514063	0.485937	584	1910	0.305743	1.67356	TRUE	mature_mRNA_like
Ctrl_SERIPH1st_1	Ctrl_Conv1st	ENSG00000135835.13	KIAA1614	chr1	180912896	180951614	+	38718	10452	28266	9	0.471297	0.30527	0.196632	0.177091	0.256055	0.945568	1.23464	-0.234641	2	36	0.0554017	-0.0791095	FALSE	low_coverage
Ctrl_SERIPH1st_1	Ctrl_Conv1st	ENSG00000232586.1	KIAA1614-AS1	chr1	180949698	180954887	-	5189	1440	3749	1	9.1	7.25946	5.13337	5.13337	0.358141	0.813894			2	113	0.0176835	1.87999	TRUE	unclassified
Ctrl_SERIPH1st_1	Ctrl_Conv1st	ENSG00000135823.14	STX6	chr1	180972711	181023121	-	50410	6477	43933	8	26.0113	49.6882	3.05065	2.62431	0.104611	3.05095	0.504949	0.495051	151	1017	0.148461	2.03093	TRUE	mature_mRNA_like
Ctrl_SERIPH1st_1	Ctrl_Conv1st	ENSG00000153029.17	MR1	chr1	181033373	181061938	+	28565	9441	19124	8	3.73318	2.35507	0.487712	0.286066	0.112873	2.70536	0.842389	0.157611	25	150	0.166556	2.25179	TRUE	mature_mRNA_like
Ctrl_SERIPH1st_1	Ctrl_Conv1st	ENSG00000162783.11	IER5	chr1	181088699	181092900	+	4201	4201			78.6137	78.6137							0	1101	0	-3.34878	TRUE	unclassified
Ctrl_SERIPH1st_1	Ctrl_Conv1st	ENSG00000198216.14	CACNA1E	chr1	181317689	181813262	+	495573	22018	473555	53	0.0410573	0	0.00509969	0	0.0348919	0.424523	0.173419	0.826581	0	11	0	-0.0820169	FALSE	low_coverage
Ctrl_SERIPH1st_1	Ctrl_Conv1st	ENSG00000179930.6	ZNF648	chr1	182054569	182061712	-	7143	3649	3494	1	0.248288	0.129281	0	0	0	1.80028			0	3	0	2.38673	FALSE	low_coverage
Ctrl_SERIPH1st_1	Ctrl_Conv1st	ENSG00000135821.20	GLUL	chr1	182378097	182392206	-	14109	12287	1745	3	228.744	74.6458	13.7943	10.1861	0.0568511	4.04181	0.814209	0.185791	2465	9458	0.260623	-5.27547	TRUE	mature_mRNA_like
Ctrl_SERIPH1st_1	Ctrl_Conv1st	ENSG00000203730.3	TEDDM1	chr1	182398116	182400667	-	2551	2551			0	0							1	1	0.909091	0	FALSE	low_coverage
Ctrl_SERIPH1st_1	Ctrl_Conv1st	ENSG00000121446.20	RGSL1	chr1	182409191	182560599	+	151408	9063	142345	28	0.0294604	0	0.000245887	0	0.00189572	0.368968	0.0230535	0.976946	0	1	0	-0.0928659	FALSE	low_coverage
Ctrl_SERIPH1st_1	Ctrl_Conv1st	ENSG00000135828.12	RNASEL	chr1	182573633	182589272	-	15639	6160	9479	7	3.89172	6.02592	0.379998	0.260345	0.0869219	3.05591	0.790356	0.209644	22	93	0.236305	0.475854	TRUE	mature_mRNA_like
Ctrl_SERIPH1st_1	Ctrl_Conv1st	ENSG00000143333.8	RGS16	chr1	182598622	182604394	-	5772	2413	3359	4	40	33.4615	4.52962	3.8405	0.101494	3.11464	0.572336	0.427664	53	374	0.141673	2.85734	TRUE	mature_mRNA_like
Ctrl_SERIPH1st_1	Ctrl_Conv1st	ENSG00000135824.13	RGS8	chr1	182641815	182684587	-	42772	6700	36072	9	0	0	0	0	0	0	0	1	0	0	0	0	FALSE	low_coverage
Ctrl_SERIPH1st_1	Ctrl_Conv1st	ENSG00000135838.15	NPL	chr1	182789292	182831017	+	41725	10016	31709	13	2.39417	4.18979	0.788609	0.55286	0.240226	1.48894	0.629555	0.370445	30	165	0.181708	-0.921586	TRUE	partially_spliced
Ctrl_SERIPH1st_1	Ctrl_Conv1st	ENSG00000287808.2	DHX9-AS1	chr1	182837184	182839561	-	2377	1244	1041	1	1.7291	1.396	1.09798	1.09798	0.375112	0.610526			3	11	0.27027	-1.27855	TRUE	partially_spliced
Ctrl_SERIPH1st_1	Ctrl_Conv1st	ENSG00000135829.18	DHX9	chr1	182839301	182887982	+	48681	6097	42308	27	369.899	493.985	12.2314	9.26151	0.0320001	4.90711	0.575944	0.424056	6308	9257	0.681423	0.964772	TRUE	mature_mRNA_like
Ctrl_SERIPH1st_1	Ctrl_Conv1st	ENSG00000157060.16	SHCBP1L	chr1	182899864	182953525	-	53661	2982	50679	10	0	0	0	0	0	0	0	1	0	0	0	0	FALSE	low_coverage
Ctrl_SERIPH1st_1	Ctrl_Conv1st	ENSG00000135862.7	LAMC1	chr1	183023419	183145592	+	122173	8497	113445	26	207.183	241.086	2.51143	2.1807	0.0119709	6.31062	0.678731	0.321269	3227	6828	0.472606	2.34513	TRUE	mature_mRNA_like
Ctrl_SERIPH1st_1	Ctrl_Conv1st	ENSG00000224468.3	LAMC1-AS1	chr1	183138401	183141282	-	2881	479	2402	2	0	0	0	0	0	0	0	1	0	0	0	0	FALSE	low_coverage
Ctrl_SERIPH1st_1	Ctrl_Conv1st	ENSG00000058085.16	LAMC2	chr1	183186056	183245127	+	59071	6975	52003	20	0.326595	0	0.0143839	0	0.0326181	1.89898	0.845709	0.154291	6	11	0.540541	1.33633	FALSE	low_coverage
Ctrl_SERIPH1st_1	Ctrl_Conv1st	ENSG00000157064.12	NMNAT2	chr1	183248236	183418380	-	170144	6943	163201	12	0.0869943	0	0.00182593	0	0.00967021	0.876889	0.0470707	0.952929	0	3	0	0.234767	FALSE	low_coverage
Ctrl_SERIPH1st_1	Ctrl_Conv1st	ENSG00000232860.11	SMG7-AS1	chr1	183448117	183472983	-	24866	5241	19625	2	0.288113	0	0	0	0	1.95648	0	1	0	5	0	-1.59639	FALSE	low_coverage
Ctrl_SERIPH1st_1	Ctrl_Conv1st	ENSG00000116698.23	SMG7	chr1	183471956	183598246	+	126290	8576	117714	30	93.0787	109.014	1.92291	2.41029	0.0202195	5.5255	1.04685	-0.046854	1393	3424	0.406822	-2.9048	TRUE	mature_mRNA_like
Ctrl_SERIPH1st_1	Ctrl_Conv1st	ENSG00000116701.17	NCF2	chr1	183554460	183593499	-	39039	4841	34136	17	0.0623838	0	0	0	0	0.699408	0	1	1	1	0.909091	0	FALSE	low_coverage
Ctrl_SERIPH1st_1	Ctrl_Conv1st	ENSG00000162704.16	ARPC5	chr1	183620845	183635783	-	14938	10650	4288	2	20.5203	19.7903	4.45942	5.27687	0.17781	2.17714	0.556232	0.443768	129	795	0.162244	-0.797865	TRUE	partially_spliced
Ctrl_SERIPH1st_1	Ctrl_Conv1st	ENSG00000143344.17	RGL1	chr1	183636084	183928532	+	292448	5350	287098	20	14.4045	15.0887	0.880031	0.841673	0.0572024	3.88753	0.519487	0.480513	133	1101	0.120788	0.515704	TRUE	mature_mRNA_like
Ctrl_SERIPH1st_1	Ctrl_Conv1st	ENSG00000173627.8	APOBEC4	chr1	183646274	183653316	-	7042	2782	4260	1	0	0	0	0	0	0			0	0	0	0	FALSE	low_coverage
Ctrl_SERIPH1st_1	Ctrl_Conv1st	ENSG00000198756.12	COLGALT2	chr1	183929853	184037729	-	107876	7806	100070	12	7.49206	8.74326	0.690387	0.366341	0.0833555	3.26386	1.10218	-0.102177	60	426	0.140812	0.746757	TRUE	mature_mRNA_like
Ctrl_SERIPH1st_1	Ctrl_Conv1st	ENSG00000198860.15	TSEN15	chr1	184051650	184123978	+	72328	10197	62059	11	9.96401	1.33018	1.73812	0.96506	0.147272	2.4529	1.15008	-0.150081	128	700	0.182831	-4.12461	TRUE	mature_mRNA_like
Ctrl_SERIPH1st_1	Ctrl_Conv1st	ENSG00000271387.2	C1orf21-DT	chr1	184385232	184386910	-	1678	1648			1.12743	1.44407							0	8	0	3.75587	TRUE	unclassified
Ctrl_SERIPH1st_1	Ctrl_Conv1st	ENSG00000116667.16	C1orf21	chr1	184386097	184629019	+	242922	12215	230606	16	14.45	1.52874	1.74129	1.68891	0.106885	2.98223	0.410767	0.589233	153	1929	0.0793116	0.44351	TRUE	mature_mRNA_like
Ctrl_SERIPH1st_1	Ctrl_Conv1st	ENSG00000116406.21	EDEM3	chr1	184690236	184754907	-	64671	18579	46092	18	17.3347	33.8783	2.12929	2.2256	0.108837	2.96731	0.553982	0.446018	431	1403	0.307177	1.35407	TRUE	mature_mRNA_like
Ctrl_SERIPH1st_1	Ctrl_Conv1st	ENSG00000135842.18	NIBAN1	chr1	184790723	184974611	-	183888	8547	175341	15	0.90991	1.01158	0.0667214	0.037559	0.0619724	2.59872	0.70514	0.29486	6	65	0.0921659	0.676759	FALSE	low_coverage
Ctrl_SERIPH1st_1	Ctrl_Conv1st	ENSG00000121481.13	RNF2	chr1	185044864	185102603	+	57739	6178	51561	10	36.8996	30.1772	3.47053	1.66467	0.0857553	3.3733	0.780766	0.219234	364	1364	0.266843	1.04486	TRUE	mature_mRNA_like
Ctrl_SERIPH1st_1	Ctrl_Conv1st	ENSG00000121486.13	TRMT1L	chr1	185118084	185157072	-	38988	5004	33866	14	32.6994	44.888	2.16057	1.66331	0.0618013	3.85891	0.670416	0.329584	354	793	0.44635	-0.394677	TRUE	mature_mRNA_like
Ctrl_SERIPH1st_1	Ctrl_Conv1st	ENSG00000116668.14	SWT1	chr1	185156102	185291983	+	135881	5865	129940	20	3.52208	3.61265	0.387048	0.356185	0.0965417	2.89468	0.747253	0.252747	28	238	0.117598	-0.442775	TRUE	mature_mRNA_like
Ctrl_SERIPH1st_1	Ctrl_Conv1st	ENSG00000116679.18	IVNS1ABP	chr1	185292930	185317780	-	24850	12525	12091	13	38.8881	59.7784	10.8658	4.80499	0.217953	1.83003	0.851	0.149	815	2070	0.393701	0.337917	TRUE	partially_spliced
Ctrl_SERIPH1st_1	Ctrl_Conv1st	ENSG00000293113.2	GS1-279B7.1	chr1	185321156	185335081	-	13925	1253	12672	7	0	0	0	0	0	0	0	1	0	0	0	0	FALSE	low_coverage
Ctrl_SERIPH1st_1	Ctrl_Conv1st	ENSG00000261729.3	GS1-204I12.4	chr1	185565551	185680908	+	115357	3158	112199	10	0.0189994	0	0.00754013	0	0.0595872	0.146079	0.542392	0.457608	0	3	0	0.120701	FALSE	low_coverage
Ctrl_SERIPH1st_1	Ctrl_Conv1st	ENSG00000143341.12	HMCN1	chr1	185734390	186190949	+	456559	18739	437820	107	3.09883	2.96566	0.165296	0.003571	0.049135	3.59187	0.865708	0.134292	146	436	0.334786	0.485137	TRUE	mature_mRNA_like
Ctrl_SERIPH1st_1	Ctrl_Conv1st	ENSG00000116690.14	PRG4	chr1	186296269	186314567	+	18298	5058	13240	12	0	0	0	0	0	0	0	1	0	0	0	0	FALSE	low_coverage
Ctrl_SERIPH1st_1	Ctrl_Conv1st	ENSG00000047410.14	TPR	chr1	186311651	186375693	-	64042	12350	51445	47	54.4273	66.4857	2.7794	2.19721	0.0485004	4.24314	1.06524	-0.0652397	1787	2731	0.654315	0.459537	TRUE	mature_mRNA_like
Ctrl_SERIPH1st_1	Ctrl_Conv1st	ENSG00000157181.17	ODR4	chr1	186375504	186421378	+	45874	4323	41551	15	22.2609	36.8242	2.50745	1.79262	0.100829	3.10027	0.84108	0.15892	197	669	0.294425	-0.300985	TRUE	mature_mRNA_like
Ctrl_SERIPH1st_1	Ctrl_Conv1st	ENSG00000229739.5	PDC-AS1	chr1	186423480	186521147	+	97667	7021	90538	9	1.03048	0.211068	0.251143	0.205349	0.181774	1.6868	0.619188	0.380812	1	100	0.00999001	-1.71298	TRUE	unclassified
Ctrl_SERIPH1st_1	Ctrl_Conv1st	ENSG00000116703.14	PDC	chr1	186443565	186461114	-	17549	1331	16218	4	0	0	0	0	0	0	0	1	0	0	0	0	FALSE	low_coverage
Ctrl_SERIPH1st_1	Ctrl_Conv1st	ENSG00000073756.13	PTGS2	chr1	186671790	186680922	-	9132	5484	3620	8	0.165208	0	0	0	0	1.40712	0	1	0	3	0	2.10694	FALSE	low_coverage
Ctrl_SERIPH1st_1	Ctrl_Conv1st	ENSG00000273129.4	PACERR	chr1	186680107	186683165	+	3058	3058			0	0							0	0	0	0	FALSE	low_coverage
Ctrl_SERIPH1st_1	Ctrl_Conv1st	ENSG00000116711.11	PLA2G4A	chr1	186828948	186988986	+	160038	3118	156826	18	12.1607	10.0359	0.32939	0.222594	0.0261627	4.83561	0.527943	0.472057	96	299	0.320963	0.742915	TRUE	mature_mRNA_like
Ctrl_SERIPH1st_1	Ctrl_Conv1st	ENSG00000162670.12	BRINP3	chr1	190097657	190478404	-	380747	4321	376426	12	4.03495	3.52683	0.225612	0.292166	0.0517392	3.66664	0.816618	0.183382	14	341	0.0410437	-0.281468	TRUE	mature_mRNA_like
Ctrl_SERIPH1st_1	Ctrl_Conv1st	ENSG00000237457.7	BRINP3-DT	chr1	190474870	190481555	+	6685	4264	2421	3	0.424249	0.11038	0	0	0	2.39025	0	1	1	6	0.163934	2.95652	FALSE	low_coverage
Ctrl_SERIPH1st_1	Ctrl_Conv1st	ENSG00000150681.10	RGS18	chr1	192158461	192185815	+	27354	2801	24553	6	0	0	0	0	0	0	0	1	0	0	0	0	FALSE	low_coverage
Ctrl_SERIPH1st_1	Ctrl_Conv1st	ENSG00000285280.3	RGS2-AS1	chr1	192167785	192986946	-	819161	16727	802434	52	0.149339	0	0.0270639	0	0.0979145	0.972557	1.0923	-0.0922985	2	81	0.0246609	-0.930147	FALSE	low_coverage
Ctrl_SERIPH1st_1	Ctrl_Conv1st	ENSG00000253148.1	RGS21	chr1	192316991	192367285	+	50294	1794	48500	4	0	0	0	0	0	0	0	1	0	0	0	0	FALSE	low_coverage
Ctrl_SERIPH1st_1	Ctrl_Conv1st	ENSG00000090104.13	RGS1	chr1	192575762	192580024	+	4262	4074	181	1	0	0	0	0	0	0			0	0	0	0	FALSE	low_coverage
Ctrl_SERIPH1st_1	Ctrl_Conv1st	ENSG00000127074.16	RGS13	chr1	192636060	192660311	+	24251	6005	18246	5	0.0178185	0	0.0106871	0	0.0831644	0.0900793	0.0735629	0.926437	0	1	0	0.500751	FALSE	low_coverage
Ctrl_SERIPH1st_1	Ctrl_Conv1st	ENSG00000116741.8	RGS2	chr1	192809038	192812275	+	3237	2088	1068	3	5.92241	3.9021	1.24906	1.01587	0.171776	2.15838	0.808923	0.191077	24	46	0.520607	1.55465	TRUE	partially_spliced
Ctrl_SERIPH1st_1	Ctrl_Conv1st	ENSG00000116750.15	UCHL5	chr1	193012245	193060080	-	47835	6832	40843	13	21.9982	45.6106	5.13447	3.26094	0.18854	2.07782	0.738877	0.261123	260	1208	0.215214	0.291092	TRUE	partially_spliced
Ctrl_SERIPH1st_1	Ctrl_Conv1st	ENSG00000116747.14	RO60	chr1	193059444	193091777	+	32333	9272	22964	12	64.6804	49.0039	5.63395	3.94839	0.0800113	3.49796	1.71527	-0.715272	506	2437	0.207624	1.76741	TRUE	mature_mRNA_like
Ctrl_SERIPH1st_1	Ctrl_Conv1st	ENSG00000023572.10	GLRX2	chr1	193090865	193106114	-	15249	6210	8956	4	10.4087	11.5422	2.4138	2.29775	0.186791	2.06364	0.567848	0.432152	45	288	0.156196	1.71373	TRUE	partially_spliced
Ctrl_SERIPH1st_1	Ctrl_Conv1st	ENSG00000134371.16	CDC73	chr1	193115731	193264613	+	148882	20519	128266	25	11.8067	48.5766	2.48314	2.1468	0.172562	2.20458	0.504704	0.495296	426	1875	0.227188	0.267172	TRUE	partially_spliced
Ctrl_SERIPH1st_1	Ctrl_Conv1st	ENSG00000162630.7	B3GALT2	chr1	193178729	193186613	-	7884	3548	4336	1	0.0806087	0.240336	0	0	0	0.852868			0	1	0	-1.14292	FALSE	low_coverage
Ctrl_SERIPH1st_1	Ctrl_Conv1st	ENSG00000162687.19	KCNT2	chr1	196225778	196609225	-	383447	7192	376255	32	2.73192	2.61177	0.315018	0.29236	0.100103	2.77054	0.753207	0.246793	42	461	0.0910865	0.0670124	TRUE	mature_mRNA_like
Ctrl_SERIPH1st_1	Ctrl_Conv1st	ENSG00000000971.18	CFH	chr1	196651753	196752476	+	100723	15284	85364	29	0	0	0	0	0	0	0	1	0	0	0	0	FALSE	low_coverage
Ctrl_SERIPH1st_1	Ctrl_Conv1st	ENSG00000116785.16	CFHR3	chr1	196774741	196797364	+	22623	6289	16334	5	0.543966	0.208251	0.130158	0.088692	0.168136	1.48436	1.17175	-0.17175	1	19	0.052356	2.26886	FALSE	low_coverage
Ctrl_SERIPH1st_1	Ctrl_Conv1st	ENSG00000244414.9	CFHR1	chr1	196819313	196837159	+	17846	3479	14367	7	0	0	0.0420408	0	0.295977	-0.506305	0.678324	0.321676	1	3	0.322581	0	FALSE	low_coverage
Ctrl_SERIPH1st_1	Ctrl_Conv1st	ENSG00000134365.16	CFHR4	chr1	196888013	196920294	+	32281	7339	24864	12	0.0243902	0	0	0	0	0.314873	0	1	1	1	0.909091	0.244692	FALSE	low_coverage
Ctrl_SERIPH1st_1	Ctrl_Conv1st	ENSG00000080910.15	CFHR2	chr1	196943730	196964115	+	20385	8714	11671	6	0	0	0	0	0	0	0	1	0	0	0	0	FALSE	low_coverage
Ctrl_SERIPH1st_1	Ctrl_Conv1st	ENSG00000134389.12	CFHR5	chr1	196975009	197009678	+	34669	4705	29964	11	0	0	0	0	0	0	0	1	0	0	0	0	FALSE	low_coverage
Ctrl_SERIPH1st_1	Ctrl_Conv1st	ENSG00000143278.6	F13B	chr1	197038736	197067260	-	28524	2897	25540	11	0.104246	0	0	0	0	1.03031	0	1	1	1	0.909091	0	FALSE	low_coverage
Ctrl_SERIPH1st_1	Ctrl_Conv1st	ENSG00000066279.20	ASPM	chr1	197084120	197146694	-	62574	11994	50494	25	73.6722	70.6701	4.43732	3.95967	0.0567363	4.02316	0.592707	0.407293	1072	3697	0.289957	-0.0987641	TRUE	mature_mRNA_like
Ctrl_SERIPH1st_1	Ctrl_Conv1st	ENSG00000177888.9	ZBTB41	chr1	197153681	197201449	-	47768	9162	38606	12	8.3115	6.97619	0.826478	0.518267	0.0894652	3.18254	1.60744	-0.607442	43	362	0.118752	0.449974	TRUE	mature_mRNA_like
Ctrl_SERIPH1st_1	Ctrl_Conv1st	ENSG00000134376.18	CRB1	chr1	197268203	197478455	+	210252	12721	197531	14	0.0237404	0	0.0258238	0	0.172661	-0.0240892	1.01083	-0.0108339	0	18	0	-0.10302	FALSE	low_coverage
Ctrl_SERIPH1st_1	Ctrl_Conv1st	ENSG00000213047.14	DENND1B	chr1	197504747	197775706	-	270959	13213	257746	24	4.96019	8.66667	0.787454	0.566075	0.134662	2.51145	0.763311	0.236689	81	898	0.0901904	0.26695	TRUE	mature_mRNA_like
Ctrl_SERIPH1st_1	Ctrl_Conv1st	ENSG00000203724.12	C1orf53	chr1	197902448	197907368	+	4920	810	4110	3	6.74691	5.07962	0.727494	0.724221	0.0960464	3.04863	0.59308	0.40692	9	28	0.320285	-0.988863	TRUE	mature_mRNA_like
Ctrl_SERIPH1st_1	Ctrl_Conv1st	ENSG00000143355.16	LHX9	chr1	197911901	197935478	+	23577	10442	13050	7	1.09031	1.61084	0.14023	0	0.105393	2.30885	1.12009	-0.120085	9	44	0.204082	-0.0737127	TRUE	mature_mRNA_like
Ctrl_SERIPH1st_1	Ctrl_Conv1st	ENSG00000151414.16	NEK7	chr1	198156882	198322451	+	165569	7078	158491	20	23.9532	6.5	1.98	1.29684	0.0760566	3.53158	0.656555	0.343445	163	1612	0.10111	0.575652	TRUE	mature_mRNA_like
Ctrl_SERIPH1st_1	Ctrl_Conv1st	ENSG00000151418.12	ATP6V1G3	chr1	198523221	198540945	-	17724	678	17046	4	0	0	0	0	0	0	0	1	0	0	0	0	FALSE	low_coverage
Ctrl_SERIPH1st_1	Ctrl_Conv1st	ENSG00000081237.23	PTPRC	chr1	198629899	198759346	+	129447	17421	111842	30	0	0	0	0	0	0	0	1	0	0	0	0	FALSE	low_coverage
Ctrl_SERIPH1st_1	Ctrl_Conv1st	ENSG00000261573.2	PTPRC-AS1	chr1	198657552	198671462	-	13910	483	13427	3	0	0	0	0	0	0	0	1	0	0	0	0	FALSE	low_coverage
Ctrl_SERIPH1st_1	Ctrl_Conv1st	ENSG00000229989.7	MIR181A1HG	chr1	198739202	198937683	-	198481	14462	183954	13	3.25342	0	1.1231	0.803899	0.250886	1.4551	1.25583	-0.255829	3	845	0.00354988	-4.61865	TRUE	unclassified
Ctrl_SERIPH1st_1	Ctrl_Conv1st	ENSG00000116833.15	NR5A2	chr1	200027596	200177420	+	149824	7623	142115	11	1.30788	0.774648	0.185392	0.217268	0.116359	2.30251	1.02034	-0.0203367	5	121	0.0412882	-0.941961	TRUE	mature_mRNA_like
Ctrl_SERIPH1st_1	Ctrl_Conv1st	ENSG00000162702.9	ZNF281	chr1	200404939	200410056	-	5117	4908	209	1	55.3985	28.4172	3.33014	3.33014	0.0566075	4.01611			0	910	0	-1.56897	TRUE	mature_mRNA_like
Ctrl_SERIPH1st_1	Ctrl_Conv1st	ENSG00000118193.13	KIF14	chr1	200551496	200620771	-	69275	7431	61844	30	26.132	31.8291	1.17997	0.87038	0.0430457	4.35715	0.985365	0.0146353	332	896	0.370494	-0.784753	TRUE	mature_mRNA_like
Ctrl_SERIPH1st_1	Ctrl_Conv1st	ENSG00000118197.15	DDX59	chr1	200623895	200670049	-	46154	6727	39427	11	10.8279	11.7185	0.911761	0.691915	0.0770093	3.43307	1.10386	-0.103857	64	365	0.175294	-5.51751	TRUE	mature_mRNA_like
Ctrl_SERIPH1st_1	Ctrl_Conv1st	ENSG00000260088.2	DDX59-AS1	chr1	200669488	200694250	+	24762	1308	23454	5	1.64067	0.874227	0.215315	0.214463	0.11008	2.46478	1.36825	-0.368246	2	24	0.0829876	-1.44378	TRUE	mature_mRNA_like
Ctrl_SERIPH1st_1	Ctrl_Conv1st	ENSG00000118200.17	CAMSAP2	chr1	200738892	200860707	+	121815	8445	113341	16	44.3094	50.1223	1.90681	1.43998	0.0411694	4.46789	0.75071	0.24929	377	1971	0.191264	0.932915	TRUE	mature_mRNA_like
Ctrl_SERIPH1st_1	Ctrl_Conv1st	ENSG00000170128.5	GPR25	chr1	200872980	200874178	+	1198	1198			0	0							0	0	0	0	FALSE	low_coverage
Ctrl_SERIPH1st_1	Ctrl_Conv1st	ENSG00000163362.12	INAVA	chr1	200891002	200915742	+	24740	5635	19081	16	3.06566	1.13602	0.415335	0.196025	0.115983	2.61893	0.870295	0.129705	26	84	0.309156	1.12755	TRUE	mature_mRNA_like
Ctrl_SERIPH1st_1	Ctrl_Conv1st	ENSG00000116852.15	KIF21B	chr1	200969389	201023714	-	54325	12164	41905	30	1.7865	1.92264	0.162892	0	0.0794832	2.84317	1.15375	-0.153755	35	95	0.368034	1.50463	TRUE	mature_mRNA_like
Ctrl_SERIPH1st_1	Ctrl_Conv1st	ENSG00000081248.13	CACNA1S	chr1	201039511	201112451	-	72940	7283	65567	43	0	0	0.000167656	0	0.00167375	-0.00241674	0.00102621	0.998974	1	1	0.909091	-0.00723378	FALSE	low_coverage
Ctrl_SERIPH1st_1	Ctrl_Conv1st	ENSG00000232237.5	ASCL5	chr1	201113942	201127184	-	13242	2036	11206	1	0.147839	0.077778	0.02695	0.02695	0.0980751	0.965145			0	2	0	0.813774	FALSE	low_coverage
Ctrl_SERIPH1st_1	Ctrl_Conv1st	ENSG00000116857.18	TMEM9	chr1	201134771	201172330	-	37559	4106	33453	6	51.3833	24.5224	4.17365	7.49873	0.0749887	3.59057	0.658432	0.341568	230	1167	0.19707	4.37485	TRUE	mature_mRNA_like
Ctrl_SERIPH1st_1	Ctrl_Conv1st	ENSG00000163395.17	IGFN1	chr1	201190823	201228952	+	38129	12117	26012	23	0	0	0.01161	0	0.104023	-0.158467	0.211182	0.788818	0	1	0	0.338008	FALSE	low_coverage
Ctrl_SERIPH1st_1	Ctrl_Conv1st	ENSG00000081277.13	PKP1	chr1	201283451	201332993	+	49542	6211	43237	14	0	0	0	0	0	0	0	1	0	0	0	0	FALSE	low_coverage
Ctrl_SERIPH1st_1	Ctrl_Conv1st	ENSG00000118194.23	TNNT2	chr1	201359001	201379773	-	20772	9345	11427	14	0	0	0	0	0	0	0	1	0	0	0	0	FALSE	low_coverage
Ctrl_SERIPH1st_1	Ctrl_Conv1st	ENSG00000159166.16	LAD1	chr1	201380832	201399915	-	19083	3523	15488	11	0	0	0	0	0	0	0	1	0	0	0	0	FALSE	low_coverage
Ctrl_SERIPH1st_1	Ctrl_Conv1st	ENSG00000159173.20	TNNI1	chr1	201403783	201429866	-	26083	7488	18595	12	0	0	0	0	0	0	0	1	0	0	0	0	FALSE	low_coverage
Ctrl_SERIPH1st_1	Ctrl_Conv1st	ENSG00000174307.7	PHLDA3	chr1	201464277	201469237	-	4960	3243	1717	3	18.7857	11.5817	1.9237	0.945652	0.092444	3.22222	0.614877	0.385123	30	216	0.138825	-0.0395205	TRUE	mature_mRNA_like
Ctrl_SERIPH1st_1	Ctrl_Conv1st	ENSG00000159176.15	CSRP1	chr1	201483529	201513100	-	29571	11278	18227	7	6.90495	0	0.545345	0.226569	0.0722283	3.44023	0.689756	0.310244	43	293	0.146708	4	TRUE	mature_mRNA_like
Ctrl_SERIPH1st_1	Ctrl_Conv1st	ENSG00000224536.3	CSRP1-AS1	chr1	201507190	201584527	+	77337	7176	70161	9	0.249025	0.164423	0.235117	0.17445	0.4025	0.058666	0.751772	0.248228	4	63	0.0633914	-0.0988005	FALSE	low_coverage
Ctrl_SERIPH1st_1	Ctrl_Conv1st	ENSG00000134369.18	NAV1	chr1	201538981	201826969	+	287988	23226	264647	33	8.66878	17.9495	0.483051	0.288219	0.0522114	3.91068	1.06354	-0.063537	269	1102	0.244079	2.93752	TRUE	mature_mRNA_like
Ctrl_SERIPH1st_1	Ctrl_Conv1st	ENSG00000231871.5	IPO9-AS1	chr1	201688258	201829559	-	141301	1274	140027	5	3.7394	0.833429	0.48777	2.18041	0.112723	2.70756	0.636815	0.363185	0	246	0	-2.43163	TRUE	mature_mRNA_like
Ctrl_SERIPH1st_1	Ctrl_Conv1st	ENSG00000198700.11	IPO9	chr1	201829103	201884291	+	55188	12054	43134	25	102.882	225.203	5.68	5.52455	0.0522721	4.15518	0.711418	0.288582	2290	4965	0.461219	2.99764	TRUE	mature_mRNA_like
Ctrl_SERIPH1st_1	Ctrl_Conv1st	ENSG00000198892.8	SHISA4	chr1	201888678	201892587	+	3909	2028	1881	3	2.5646	5.6525	0.649123	0.930736	0.19589	1.83064	0.634761	0.365239	10	22	0.452489	1.33272	TRUE	partially_spliced
Ctrl_SERIPH1st_1	Ctrl_Conv1st	ENSG00000163431.15	LMOD1	chr1	201896455	201946551	-	50096	3930	46166	2	0.689313	0.639831	0.184551	0.0939815	0.189504	1.47191	0.484487	0.515513	2	38	0.0524934	-0.640432	FALSE	low_coverage
Ctrl_SERIPH1st_1	Ctrl_Conv1st	ENSG00000134375.12	TIMM17A	chr1	201955475	201970664	+	15189	3603	11586	6	33.1302	18.1347	4.43932	2.91184	0.117849	2.87194	0.638048	0.361952	314	571	0.549816	0.353985	TRUE	mature_mRNA_like
Ctrl_SERIPH1st_1	Ctrl_Conv1st	ENSG00000176393.12	RNPEP	chr1	201982371	202006147	+	23776	3749	20027	13	105.704	109.555	5.33045	3.38775	0.0479639	4.28418	0.721092	0.278908	695	1678	0.414159	1.33172	TRUE	mature_mRNA_like
Ctrl_SERIPH1st_1	Ctrl_Conv1st	ENSG00000234678.3	ELF3-AS1	chr1	201995695	202010463	-	14768	5795	8973	3	0.178775	0.056779	0.27215	0	0.493988	-0.416784	0.769293	0.230707	6	12	0.495868	-0.119887	FALSE	low_coverage
Ctrl_SERIPH1st_1	Ctrl_Conv1st	ENSG00000163435.16	ELF3	chr1	202007944	202017183	+	9239	7186	1956	4	0.464097	0.482658	0.146728	0	0.20642	1.19302	0.653562	0.346438	5	12	0.413223	0.751171	FALSE	low_coverage
Ctrl_SERIPH1st_1	Ctrl_Conv1st	ENSG00000170075.10	GPR37L1	chr1	202122885	202133592	+	10707	7581	3126	2	0	0	0	0	0	0	0	1	0	0	0	0	FALSE	low_coverage
Ctrl_SERIPH1st_1	Ctrl_Conv1st	ENSG00000143862.9	ARL8A	chr1	202133403	202144743	-	11340	1975	9365	5	63.1954	83.478	2.75771	2.59657	0.0417499	4.46917	0.524014	0.475986	195	503	0.387597	2.08895	TRUE	mature_mRNA_like
Ctrl_SERIPH1st_1	Ctrl_Conv1st	ENSG00000143851.18	PTPN7	chr1	202147011	202161588	-	14577	6114	8463	9	0	0	0	0	0	0	0	1	0	0	0	0	FALSE	low_coverage
Ctrl_SERIPH1st_1	Ctrl_Conv1st	ENSG00000293457.2	PTPRVP	chr1	202168050	202189455	+	21405	5864	15435	17	0	0	0.038484	0	0.277895	-0.46972	0.249073	0.750927	0	2	0	-0.945033	FALSE	low_coverage
Ctrl_SERIPH1st_1	Ctrl_Conv1st	ENSG00000133067.19	LGR6	chr1	202193691	202319781	+	126090	4976	121114	22	0.121383	0	0.0316563	0	0.125104	0.749766	0.604775	0.395225	0	15	0	0.388799	FALSE	low_coverage
Ctrl_SERIPH1st_1	Ctrl_Conv1st	ENSG00000077152.13	UBE2T	chr1	202328713	202341984	-	13271	2306	10965	6	45.6813	13.8201	4.11911	4.17942	0.0825466	3.43975	0.617077	0.382923	288	503	0.572451	-0.798689	TRUE	mature_mRNA_like
Ctrl_SERIPH1st_1	Ctrl_Conv1st	ENSG00000077157.24	PPP1R12B	chr1	202348665	202592706	+	244041	21151	222803	31	9.95173	13.1619	1.07338	1.0942	0.0964829	3.0987	0.830346	0.169654	179	1501	0.119246	1.38551	TRUE	mature_mRNA_like
Ctrl_SERIPH1st_1	Ctrl_Conv1st	ENSG00000143858.13	SYT2	chr1	202590595	202710526	-	119931	8157	111774	11	2.34314	0.866766	0.128393	0.001418	0.0499284	3.41915	0.470445	0.529555	7	112	0.0624442	0.991622	TRUE	mature_mRNA_like
Ctrl_SERIPH1st_1	Ctrl_Conv1st	ENSG00000226862.1	SYT2-AS1	chr1	202604267	202605293	+	1026	314	712	1	0	0	0.424157	0.424157	0.809217	-2.39			0	1	0	0	FALSE	low_coverage
Ctrl_SERIPH1st_1	Ctrl_Conv1st	ENSG00000117139.19	KDM5B	chr1	202724494	202808487	-	83993	24917	59027	24	20.5648	21.1894	1.8027	1.07906	0.0802358	3.44106	1.83823	-0.838227	885	2068	0.427929	1.89952	TRUE	mature_mRNA_like
Ctrl_SERIPH1st_1	Ctrl_Conv1st	ENSG00000228288.11	PCAT6	chr1	202810826	202827227	+	16401	5369	10987	6	0.455764	0	0.0792757	0	0.124836	1.63229	0.426294	0.573706	0	11	0	-2.14344	FALSE	low_coverage
Ctrl_SERIPH1st_1	Ctrl_Conv1st	ENSG00000293264.2	ACTG1P25	chr1	202861712	202875241	+	13529	2825	10704	3	2.67292	0.252215	0.247477	0.276454	0.0819353	2.99642	0.693566	0.306434	3	34	0.0879765	2.67743	TRUE	mature_mRNA_like
Ctrl_SERIPH1st_1	Ctrl_Conv1st	ENSG00000183155.6	RABIF	chr1	202878281	202889149	-	10868	3131	7737	1	18.9019	25.5056	2.52436	2.52436	0.117269	2.85611			31	264	0.11738	1.93084	TRUE	mature_mRNA_like
Ctrl_SERIPH1st_1	Ctrl_Conv1st	ENSG00000117153.17	KLHL12	chr1	202891095	202928636	-	37541	3605	33936	13	41.8976	44.089	2.91932	2.07611	0.0649937	3.79801	0.827704	0.172296	238	838	0.283976	1.38297	TRUE	mature_mRNA_like
Ctrl_SERIPH1st_1	Ctrl_Conv1st	ENSG00000159346.14	ADIPOR1	chr1	202940089	202958572	-	18483	5421	12981	10	115.537	57.8188	3.38456	3.07332	0.0284366	5.05248	0.35996	0.64004	675	2239	0.30146	3.29726	TRUE	mature_mRNA_like
Ctrl_SERIPH1st_1	Ctrl_Conv1st	ENSG00000159348.14	CYB5R1	chr1	202961117	202967277	-	6160	5276	802	3	16.8478	17.1264	4.24813	4.41438	0.200422	1.96263	0.784247	0.215753	142	310	0.457917	-0.562637	TRUE	partially_spliced
Ctrl_SERIPH1st_1	Ctrl_Conv1st	ENSG00000163444.13	TMEM183A	chr1	203007355	203024848	+	17493	4145	13348	9	95.5889	85.916	4.02427	4.05728	0.0403585	4.53614	0.6992	0.3008	836	1497	0.558413	0.529453	TRUE	mature_mRNA_like
Ctrl_SERIPH1st_1	Ctrl_Conv1st	ENSG00000143847.17	PPFIA4	chr1	203026490	203078740	+	52250	10080	42074	34	1.1126	0.319385	0.213505	0	0.149712	1.95154	1.22424	-0.224242	13	67	0.193741	0.704745	TRUE	mature_mRNA_like
Ctrl_SERIPH1st_1	Ctrl_Conv1st	ENSG00000122180.6	MYOG	chr1	203083128	203086013	-	2885	1592	1293	2	0	0	0	0	0	0	0	1	0	0	0	0	FALSE	low_coverage
Ctrl_SERIPH1st_1	Ctrl_Conv1st	ENSG00000163485.19	ADORA1	chr1	203090653	203167407	+	76754	4894	71860	6	0.682468	0	0.0443641	0.0368385	0.0536555	2.43832	0.946343	0.0536574	2	22	0.0904977	1.12165	FALSE	low_coverage
Ctrl_SERIPH1st_1	Ctrl_Conv1st	ENSG00000234775.2	ADORA1-AS2	chr1	203115467	203128367	-	12900	3059	9841	3	0	0	0.0306876	0	0.234816	-0.386122	0.137486	0.862514	0	1	0	-0.832169	FALSE	low_coverage
Ctrl_SERIPH1st_1	Ctrl_Conv1st	ENSG00000224671.2	ADORA1-AS1	chr1	203144693	203152579	-	7886	353	7533	3	0	0	0	0	0	0	0	1	0	0	0	0	FALSE	low_coverage
Ctrl_SERIPH1st_1	Ctrl_Conv1st	ENSG00000133055.11	MYBPH	chr1	203167810	203175880	-	8070	2482	5499	8	0	0	0	0	0	0	0	1	0	0	0	0	FALSE	low_coverage
Ctrl_SERIPH1st_1	Ctrl_Conv1st	ENSG00000133048.14	CHI3L1	chr1	203178930	203186796	-	7866	3601	4223	7	0	0	0	0	0	0	0	1	0	0	0	0	FALSE	low_coverage
Ctrl_SERIPH1st_1	Ctrl_Conv1st	ENSG00000133063.17	CHIT1	chr1	203212826	203273641	-	60815	7889	52892	19	0	0	0	0	0	0	0	1	0	0	0	0	FALSE	low_coverage
Ctrl_SERIPH1st_1	Ctrl_Conv1st	ENSG00000233791.8	BTG2-DT	chr1	203292300	203321067	-	28767	4949	23818	6	0	0	0.0120078	0	0.107205	-0.163599	0.442327	0.557673	0	1	0	0	FALSE	low_coverage
Ctrl_SERIPH1st_1	Ctrl_Conv1st	ENSG00000159388.6	BTG2	chr1	203305490	203309602	+	4112	2757	1355	1	90.6431	100.447	5.9417	5.9417	0.0614543	3.90876			32	860	0.037205	1.47027	TRUE	mature_mRNA_like
Ctrl_SERIPH1st_1	Ctrl_Conv1st	ENSG00000122176.13	FMOD	chr1	203340622	203351758	-	11136	3858	7278	4	0.078279	0	0.124485	0	0.411161	-0.332481	1.39911	-0.399107	0	4	0	-0.96302	FALSE	low_coverage
Ctrl_SERIPH1st_1	Ctrl_Conv1st	ENSG00000188783.7	PRELP	chr1	203475776	203491352	+	15576	6053	9523	3	0.149677	0	0	0	0	1.32007	0	1	0	3	0	1.55502	FALSE	low_coverage
Ctrl_SERIPH1st_1	Ctrl_Conv1st	ENSG00000188770.11	OPTC	chr1	203494120	203508949	+	14829	1682	13147	8	0	0	0	0	0	0	0	1	0	0	0	0	FALSE	low_coverage
Ctrl_SERIPH1st_1	Ctrl_Conv1st	ENSG00000058668.17	ATP2B4	chr1	203626777	203744081	+	117304	9704	107600	24	54.8011	59.9959	1.56275	1.4702	0.027677	5.04519	1.13386	-0.13386	631	2336	0.270108	3.58648	TRUE	mature_mRNA_like
Ctrl_SERIPH1st_1	Ctrl_Conv1st	ENSG00000122188.14	LAX1	chr1	203765176	203778175	+	12999	5139	7860	5	0	0	0	0	0	0	0	1	0	0	0	0	FALSE	low_coverage
Ctrl_SERIPH1st_1	Ctrl_Conv1st	ENSG00000257315.4	ZBED6	chr1	203795622	203854124	+	58502	11697	46805	16	90.9156	192.057	2.93443	1.84044	0.0312339	4.90662	0.734255	0.265745	1534	4010	0.382534	0.387606	TRUE	mature_mRNA_like
Ctrl_SERIPH1st_1	Ctrl_Conv1st	ENSG00000058673.17	ZC3H11A	chr1	203795622	203854999	+	59377	12829	46465	18	81.4939	161.59	3.381	2.19617	0.0397882	4.55089	2.06198	-1.06198	1534	4016	0.381963	0.391128	TRUE	mature_mRNA_like
Ctrl_SERIPH1st_1	Ctrl_Conv1st	ENSG00000182004.14	SNRPE	chr1	203861597	203871152	+	9555	2105	7450	3	69.5781	195.548	9.88685	9.48489	0.124261	2.80261	0.328854	0.671146	400	737	0.542667	-0.92307	TRUE	mature_mRNA_like
Ctrl_SERIPH1st_1	Ctrl_Conv1st	ENSG00000143842.16	SOX13	chr1	204073110	204127743	+	54633	8391	46189	17	11.1284	11.6042	1.17976	1.04493	0.0950798	3.1332	0.812454	0.187546	104	496	0.209635	1.71226	TRUE	mature_mRNA_like
Ctrl_SERIPH1st_1	Ctrl_Conv1st	ENSG00000143845.15	ETNK2	chr1	204131061	204152044	-	20983	4513	16443	11	17.9696	17.6991	0.512863	0.24535	0.0275992	4.88186	0.858265	0.141735	113	299	0.3778	0.64753	TRUE	mature_mRNA_like
Ctrl_SERIPH1st_1	Ctrl_Conv1st	ENSG00000230550.3	ERLNC1	chr1	204141403	204143327	+	1924	1536	388	1	0	0	0	0	0	0			0	0	0	0	FALSE	low_coverage
Ctrl_SERIPH1st_1	Ctrl_Conv1st	ENSG00000143839.16	REN	chr1	204154814	204190324	-	35510	1753	33757	12	0.172276	0	0	0	0	1.44507	0	1	0	1	0	0.360068	FALSE	low_coverage
Ctrl_SERIPH1st_1	Ctrl_Conv1st	ENSG00000170498.11	KISS1	chr1	204190340	204196491	-	6151	3553	2598	2	0	0	0	0	0	0	0	1	0	0	0	0	FALSE	low_coverage
Ctrl_SERIPH1st_1	Ctrl_Conv1st	ENSG00000174567.9	GOLT1A	chr1	204198157	204214121	-	15964	1299	14665	4	0	0	0	0	0	0	0	1	0	0	0	0	FALSE	low_coverage
[truncated: 370,657+ more rows]
