# Supplementary material
Source: HighWire-hosted journal article supplement (doi:10.1101/rna.081061.126)
Supplement: Supplemental_Table_S4.xlsx [file Supplemental_Table_S4.xlsx]

## Sheet: index
sheet	subdir	label	type	file
Control_A3SS.MATS_JC	Control	A3SS.MATS	JC	./rMATs/Control/A3SS.MATS.JC.txt
Control_A5SS.MATS_JC	Control	A5SS.MATS	JC	./rMATs/Control/A5SS.MATS.JC.txt
Control_MXE.MATS_JC	Control	MXE.MATS	JC	./rMATs/Control/MXE.MATS.JC.txt
Control_RI.MATS_JC	Control	RI.MATS	JC	./rMATs/Control/RI.MATS.JC.txt
Control_SE.MATS_JC	Control	SE.MATS	JC	./rMATs/Control/SE.MATS.JC.txt
Control_A3SS.MATS_JCEC	Control	A3SS.MATS	JCEC	./rMATs/Control/A3SS.MATS.JCEC.txt
Control_A5SS.MATS_JCEC	Control	A5SS.MATS	JCEC	./rMATs/Control/A5SS.MATS.JCEC.txt
Control_MXE.MATS_JCEC	Control	MXE.MATS	JCEC	./rMATs/Control/MXE.MATS.JCEC.txt
Control_RI.MATS_JCEC	Control	RI.MATS	JCEC	./rMATs/Control/RI.MATS.JCEC.txt
Control_SE.MATS_JCEC	Control	SE.MATS	JCEC	./rMATs/Control/SE.MATS.JCEC.txt
Control_summary	Control	summary	summary	./rMATs/Control/summary.txt
OSCHX_A3SS.MATS_JC	OSCHX	A3SS.MATS	JC	./rMATs/OSCHX/A3SS.MATS.JC.txt
OSCHX_A5SS.MATS_JC	OSCHX	A5SS.MATS	JC	./rMATs/OSCHX/A5SS.MATS.JC.txt
OSCHX_MXE.MATS_JC	OSCHX	MXE.MATS	JC	./rMATs/OSCHX/MXE.MATS.JC.txt
OSCHX_RI.MATS_JC	OSCHX	RI.MATS	JC	./rMATs/OSCHX/RI.MATS.JC.txt
OSCHX_SE.MATS_JC	OSCHX	SE.MATS	JC	./rMATs/OSCHX/SE.MATS.JC.txt
OSCHX_A3SS.MATS_JCEC	OSCHX	A3SS.MATS	JCEC	./rMATs/OSCHX/A3SS.MATS.JCEC.txt
OSCHX_A5SS.MATS_JCEC	OSCHX	A5SS.MATS	JCEC	./rMATs/OSCHX/A5SS.MATS.JCEC.txt
OSCHX_MXE.MATS_JCEC	OSCHX	MXE.MATS	JCEC	./rMATs/OSCHX/MXE.MATS.JCEC.txt
OSCHX_RI.MATS_JCEC	OSCHX	RI.MATS	JCEC	./rMATs/OSCHX/RI.MATS.JCEC.txt
OSCHX_SE.MATS_JCEC	OSCHX	SE.MATS	JCEC	./rMATs/OSCHX/SE.MATS.JCEC.txt
OSCHX_summary	OSCHX	summary	summary	./rMATs/OSCHX/summary.txt

## Sheet: Control_A3SS.MATS_JC
ID...1	GeneID	geneSymbol	chr	strand	longExonStart_0base	longExonEnd	shortES	shortEE	flankingES	flankingEE	ID...12	IJC_SAMPLE_1	SJC_SAMPLE_1	IJC_SAMPLE_2	SJC_SAMPLE_2	IncFormLen	SkipFormLen	PValue	FDR	IncLevel1	IncLevel2	IncLevelDifference
42	ENSG00000160211.21	G6PD	chrX	-	154532941	154533128	154532941	154533122	154533575	154533669	42	74,45	0,1	5,3	4,0	155	149	0.00867435	0.0470893	1.0,0.977	0.546,1.0	0.215
43	ENSG00000160211.21	G6PD	chrX	-	154532941	154533491	154532941	154533122	154533575	154533669	43	16,9	0,1	14,3	4,0	298	149	0.01457	0.0715666	1.0,0.818	0.636,1.0	0.091
44	ENSG00000160211.21	G6PD	chrX	-	154532941	154533491	154532941	154533128	154533575	154533669	44	8,2	66,38	13,3	4,3	298	149	1.00245e-06	1.93754e-05	0.057,0.026	0.619,0.333	-0.434
47	ENSG00000160211.21	G6PD	chrX	-	154533575	154533807	154533575	154533669	154534034	154534160	47	0,1	65,21	3,2	8,9	287	149	0.00519784	0.0308773	0.0,0.024	0.163,0.103	-0.121
48	ENSG00000160211.21	G6PD	chrX	-	154534337	154534499	154534337	154534496	154535167	154535385	48	12,12	96,57	1,0	2,9	152	149	0.0115619	0.0592298	0.109,0.171	0.329,0.0	-0.024
52	ENSG00000071859.16	FAM50A	chrX	+	154449178	154449297	154449220	154449297	154448892	154448954	52	1,2	69,48	2,1	7,1	191	149	0.137589	0.43203	0.011,0.031	0.182,0.438	-0.289
54	ENSG00000203879.13	GDI1	chrX	+	154438475	154438630	154438522	154438630	154437153	154437299	54	0,2	96,104	0,2	14,26	196	149	0.318653	0.819667	0.0,0.014	0.0,0.055	-0.021
55	ENSG00000203879.13	GDI1	chrX	+	154439005	154439140	154439035	154439140	154438764	154438864	55	328,262	0,2	30,43	0,0	179	149	1	1	1.0,0.991	1.0,1.0	-0.004
56	ENSG00000203879.13	GDI1	chrX	+	154441595	154441794	154441622	154441794	154441095	154441195	56	14,21	332,283	13,5	47,36	176	149	0.000489562	0.00431039	0.034,0.059	0.19,0.105	-0.101
61	ENSG00000071553.19	ATP6AP1	chrX	+	154433590	154433720	154433634	154433720	154432930	154432971	61	7,9	381,151	0,2	10,4	193	149	0.604782	1	0.014,0.044	0.0,0.279	-0.111
64	ENSG00000071553.19	ATP6AP1	chrX	+	154435681	154436516	154435687	154436516	154435273	154435505	64	364,239	6,1	12,22	0,0	155	149	0.958054	1	0.983,0.996	1.0,1.0	-0.01
66	ENSG00000102125.18	TAFAZZIN	chrX	+	154419704	154420094	154420031	154420094	154419542	154419623	66	11,11	9,10	5,21	0,0	298	149	2.17282e-09	7.67554e-08	0.379,0.355	1.0,1.0	-0.633
67	ENSG00000102119.13	EMD	chrX	+	154379917	154380019	154379941	154380019	154379689	154379794	67	1,1	370,293	0,0	14,19	173	149	1	1	0.002,0.003	0.0,0.0	0.003
69	ENSG00000102119.13	EMD	chrX	+	154380725	154380802	154380752	154380802	154380233	154380367	69	8,10	269,299	2,4	24,20	176	149	0.0699304	0.256429	0.025,0.028	0.066,0.145	-0.079
71	ENSG00000196924.20	FLNA	chrX	-	154353000	154353221	154353000	154353204	154353295	154353457	71	16,1	704,747	0,0	70,77	166	149	0.676866	1	0.02,0.001	0.0,0.0	0.011
73	ENSG00000196924.20	FLNA	chrX	-	154366023	154366224	154366023	154366221	154366307	154366470	73	373,228	4,3	34,26	0,0	152	149	1	1	0.989,0.987	1.0,1.0	-0.012
74	ENSG00000196924.20	FLNA	chrX	-	154366731	154366883	154366731	154366850	154367396	154367544	74	6,6	615,405	3,6	41,61	182	149	0.000815556	0.00667861	0.008,0.012	0.057,0.075	-0.056
75	ENSG00000172534.15	HCFC1	chrX	-	153951349	153951487	153951349	153951484	153951588	153951707	75	638,532	1,0	98,83	0,0	152	149	1	1	0.998,1.0	1.0,1.0	-0.001
76	ENSG00000172534.15	HCFC1	chrX	-	153951840	153952161	153951840	153952158	153952513	153952958	76	75,50	616,362	20,19	81,75	152	149	0.00682139	0.0387202	0.107,0.119	0.195,0.199	-0.084
77	ENSG00000172534.15	HCFC1	chrX	-	153952513	153953087	153952513	153952958	153953606	153953770	77	109,80	500,214	20,27	55,60	278	149	0.097257	0.332428	0.105,0.167	0.163,0.194	-0.042
78	ENSG00000172534.15	HCFC1	chrX	-	153952513	153953090	153952513	153952958	153953606	153953770	78	330,348	500,214	108,90	55,60	281	149	0.0608841	0.230098	0.259,0.463	0.51,0.443	-0.116
79	ENSG00000172534.15	HCFC1	chrX	-	153952513	153953090	153952513	153953087	153953606	153953770	79	258,304	37,36	92,69	4,6	152	149	0.0113449	0.0583854	0.872,0.892	0.958,0.919	-0.056
115	ENSG00000010404.19	IDS	chrX	-	149490313	149490473	149490313	149490440	149496345	149496516	115	2,6	53,48	1,2	13,14	182	149	0.603118	1	0.03,0.093	0.059,0.105	-0.02
118	ENSG00000010404.19	IDS	chrX	-	149502074	149502134	149502074	149502119	149503311	149503489	118	0,4	1,0	2,1	0,0	164	149	1	1	0.0,1.0	1.0,1.0	-0.5
119	ENSG00000010404.19	IDS	chrX	-	149502074	149502177	149502074	149502119	149503311	149503489	119	14,8	1,0	5,6	0,0	207	149	1	1	0.91,1.0	1.0,1.0	-0.045
131	ENSG00000129680.17	MAP7D3	chrX	-	136228622	136228758	136228622	136228695	136230384	136230593	131	69,175	0,2	9,8	0,0	212	149	1	1	1.0,0.984	1.0,1.0	-0.008
132	ENSG00000129680.17	MAP7D3	chrX	-	136230384	136230593	136230384	136230590	136230838	136230966	132	55,123	3,16	12,20	2,0	152	149	0.0381583	0.157637	0.947,0.883	0.855,1.0	-0.012
138	ENSG00000129680.17	MAP7D3	chrX	-	136231543	136232220	136231543	136232214	136236243	136236339	138	40,50	1,0	2,5	0,0	155	149	1	1	0.975,1.0	1.0,1.0	-0.012
139	ENSG00000156504.18	PABIR2	chrX	-	134785885	134785950	134785885	134785947	134787471	134787533	139	50,51	32,28	41,35	18,13	152	149	0.165274	0.497122	0.605,0.641	0.691,0.725	-0.085
144	ENSG00000134602.17	STK26	chrX	+	132023475	132023659	132023507	132023659	132023301	132023407	144	3,1	83,39	0,0	5,3	181	149	0.626827	1	0.029,0.021	0.0,0.0	0.025
147	ENSG00000213468.8	FIRRE	chrX	-	131711650	131711744	131711650	131711720	131749305	131749458	147	1,1	0,0	3,1	2,0	173	149	0.527671	1	1.0,1.0	0.564,1.0	0.218
150	ENSG00000188706.14	ZDHHC9	chrX	-	129810904	129811001	129810904	129810986	129811405	129811509	150	158,211	2,0	29,9	0,0	164	149	1	1	0.986,1.0	1.0,1.0	-0.007
151	ENSG00000188706.14	ZDHHC9	chrX	-	129823678	129823837	129823678	129823834	129828980	129829141	151	105,86	1,0	17,12	0,0	152	149	1	1	0.99,1.0	1.0,1.0	-0.005
157	ENSG00000125676.21	THOC2	chrX	-	123600568	123603748	123600568	123601338	123610917	123610963	157	60,55	18,41	23,27	5,8	298	149	0.115558	0.376419	0.625,0.401	0.697,0.628	-0.149
158	ENSG00000125676.21	THOC2	chrX	-	123610917	123610963	123610917	123610957	123611439	123611516	158	35,53	6,9	19,28	3,2	155	149	0.217107	0.611176	0.849,0.85	0.859,0.931	-0.046
159	ENSG00000125676.21	THOC2	chrX	-	123619400	123619517	123619400	123619436	123620906	123620965	159	13,25	40,54	7,35	20,22	230	149	0.132904	0.419925	0.174,0.231	0.185,0.508	-0.144
161	ENSG00000158290.20	CUL4B	chrX	-	120536926	120537034	120536926	120537025	120538123	120538209	161	95,149	1,1	12,12	0,0	158	149	1	1	0.989,0.993	1.0,1.0	-0.009
162	ENSG00000158290.20	CUL4B	chrX	-	120543726	120543964	120543726	120543809	120544113	120544203	162	0,2	45,152	6,5	7,10	298	149	9.01923e-09	2.7519e-07	0.0,0.007	0.3,0.2	-0.246
164	ENSG00000158290.20	CUL4B	chrX	-	120557528	120557579	120557528	120557560	120557923	120558039	164	0,2	0,1	0,1	0,0	168	149	1	1	NA,0.639	NA,1.0	-0.361
165	ENSG00000101882.11	NKAP	chrX	-	119936296	119936431	119936296	119936428	119936611	119936682	165	37,53	1,0	3,6	0,0	152	149	1	1	0.973,1.0	1.0,1.0	-0.014
166	ENSG00000125351.15	UPF3B	chrX	-	119837756	119838081	119837756	119838051	119838366	119838527	166	0,0	0,8	3,1	10,3	179	149	1	1	NA,0.0	0.2,0.217	-0.209
170	ENSG00000005022.7	SLC25A5	chrX	+	119469660	119470147	119469666	119470147	119468443	119468626	170	1044,793	2,4	10,8	0,0	155	149	1	1	0.998,0.995	1.0,1.0	-0.004
174	ENSG00000102024.20	PLS3	chrX	+	115633975	115634081	115633999	115634081	115629834	115629967	174	5,7	698,762	0,0	24,26	173	149	1	1	0.006,0.008	0.0,0.0	0.007
176	ENSG00000102024.20	PLS3	chrX	+	115645020	115645099	115645035	115645099	115643312	115643508	176	660,557	9,3	28,42	0,0	164	149	0.937148	1	0.985,0.994	1.0,1.0	-0.01
177	ENSG00000102024.20	PLS3	chrX	+	115645023	115645099	115645035	115645099	115643312	115643508	177	61,36	9,3	2,2	0,0	161	149	0.00182031	0.0131087	0.862,0.917	1.0,1.0	-0.111
179	ENSG00000157600.14	TMEM164	chrX	+	110003500	110004164	110003882	110004164	110003114	110003178	179	45,18	0,2	3,5	0,0	298	149	0.795137	1	1.0,0.818	1.0,1.0	-0.091
183	ENSG00000068366.22	ACSL4	chrX	-	109683135	109683375	109683135	109683372	109696143	109696196	183	33,15	10,0	1,2	0,0	152	149	0.00119283	0.00924907	0.764,1.0	1.0,1.0	-0.118
184	ENSG00000068366.22	ACSL4	chrX	-	109683135	109683418	109683135	109683372	109696143	109696196	184	4,1	10,0	2,2	0,0	195	149	0.000848235	0.00690448	0.234,1.0	1.0,1.0	-0.383
185	ENSG00000068366.22	ACSL4	chrX	-	109683135	109683552	109683135	109683372	109696143	109696196	185	8,6	10,0	14,6	0,0	298	149	0.000707678	0.00591588	0.286,1.0	1.0,1.0	-0.357
186	ENSG00000068366.22	ACSL4	chrX	-	109683135	109683666	109683135	109683372	109696143	109696196	186	9,6	10,0	14,6	0,0	298	149	0.000651047	0.00549614	0.31,1.0	1.0,1.0	-0.345
187	ENSG00000068366.22	ACSL4	chrX	-	109683135	109683418	109683135	109683375	109696143	109696196	187	2,1	31,15	1,2	0,2	192	149	0.0198868	0.0932502	0.048,0.049	1.0,0.437	-0.67
188	ENSG00000068366.22	ACSL4	chrX	-	109683135	109683552	109683135	109683375	109696143	109696196	188	6,6	31,15	13,6	0,2	298	149	5.40236e-07	1.12484e-05	0.088,0.167	1.0,0.6	-0.673
189	ENSG00000068366.22	ACSL4	chrX	-	109683135	109683666	109683135	109683375	109696143	109696196	189	7,6	31,15	13,6	0,2	298	149	8.03349e-07	1.60164e-05	0.101,0.167	1.0,0.6	-0.666
201	ENSG00000089682.19	RBM41	chrX	-	107069254	107070425	107069254	107069402	107088435	107088839	201	12,2	9,19	13,22	10,9	298	149	0.0164795	0.0793391	0.4,0.05	0.394,0.55	-0.247
202	ENSG00000089682.19	RBM41	chrX	-	107069254	107070425	107069254	107069330	107088734	107088839	202	19,21	0,2	27,28	0,0	298	149	0.743897	1	1.0,0.84	1.0,1.0	-0.08
204	ENSG00000089682.19	RBM41	chrX	-	107115351	107115556	107115351	107115553	107115861	107116054	204	49,51	2,2	41,61	0,0	152	149	0.518505	1	0.96,0.962	1.0,1.0	-0.039
205	ENSG00000089682.19	RBM41	chrX	-	107115351	107115640	107115351	107115553	107115861	107116054	205	1,7	2,2	4,2	0,0	236	149	0.000480725	0.00424801	0.24,0.688	1.0,1.0	-0.536
206	ENSG00000089682.19	RBM41	chrX	-	107115351	107115640	107115351	107115556	107115861	107116054	206	0,7	48,51	3,2	40,61	233	149	0.607865	1	0.0,0.081	0.046,0.021	0.007
215	ENSG00000123562.19	MORF4L2	chrX	-	103678498	103678620	103678498	103678600	103684680	103684729	215	35,29	25,28	4,2	3,1	169	149	0.612422	1	0.552,0.477	0.54,0.638	-0.075
216	ENSG00000123562.19	MORF4L2	chrX	-	103678498	103678636	103678498	103678600	103684680	103684729	216	61,69	25,28	5,4	3,1	185	149	0.809628	1	0.663,0.665	0.573,0.763	-0.004
217	ENSG00000123562.19	MORF4L2	chrX	-	103678498	103678651	103678498	103678600	103684680	103684729	217	122,142	25,28	7,8	3,1	200	149	0.865147	1	0.784,0.791	0.635,0.856	0.042
218	ENSG00000123562.19	MORF4L2	chrX	-	103678498	103678636	103678498	103678620	103684680	103684729	218	36,45	10,5	1,2	0,0	165	149	0.000864805	0.00701973	0.765,0.89	1.0,1.0	-0.172
219	ENSG00000123562.19	MORF4L2	chrX	-	103678498	103678651	103678498	103678620	103684680	103684729	219	97,118	10,5	3,6	0,0	180	149	0.00395413	0.0247414	0.889,0.951	1.0,1.0	-0.08
227	ENSG00000123562.19	MORF4L2	chrX	-	103678498	103678600	103678498	103678573	103685170	103685260	227	287,281	0,4	14,17	0,0	176	149	1	1	1.0,0.983	1.0,1.0	-0.008
228	ENSG00000123562.19	MORF4L2	chrX	-	103678498	103678620	103678498	103678573	103685170	103685260	228	122,122	0,4	15,14	0,0	196	149	0.55074	1	1.0,0.959	1.0,1.0	-0.02
229	ENSG00000123562.19	MORF4L2	chrX	-	103678498	103678636	103678498	103678573	103685170	103685260	229	119,144	0,4	14,16	0,0	212	149	0.544748	1	1.0,0.962	1.0,1.0	-0.019
230	ENSG00000123562.19	MORF4L2	chrX	-	103678498	103678651	103678498	103678573	103685170	103685260	230	357,364	0,4	14,29	0,0	227	149	1	1	1.0,0.984	1.0,1.0	-0.008
231	ENSG00000123562.19	MORF4L2	chrX	-	103678498	103678620	103678498	103678600	103685170	103685260	231	64,47	229,206	6,2	5,5	169	149	0.114699	0.374289	0.198,0.167	0.514,0.261	-0.205
232	ENSG00000123562.19	MORF4L2	chrX	-	103678498	103678636	103678498	103678600	103685170	103685260	232	61,69	229,206	5,4	5,5	185	149	0.0619852	0.233532	0.177,0.212	0.446,0.392	-0.225
233	ENSG00000123562.19	MORF4L2	chrX	-	103678498	103678651	103678498	103678600	103685170	103685260	233	299,289	229,206	5,17	5,5	200	149	0.383058	0.930059	0.493,0.511	0.427,0.717	-0.07
234	ENSG00000123562.19	MORF4L2	chrX	-	103678498	103678636	103678498	103678620	103685170	103685260	234	36,45	39,23	1,2	2,0	165	149	0.215136	0.607624	0.455,0.639	0.311,1.0	-0.108
235	ENSG00000123562.19	MORF4L2	chrX	-	103678498	103678651	103678498	103678620	103685170	103685260	235	274,265	39,23	1,15	2,0	180	149	0.40029	0.957248	0.853,0.905	0.293,1.0	0.233
271	ENSG00000196440.12	ARMCX4	chrX	+	101488007	101488099	101488043	101488099	101487607	101487691	271	1,0	2,0	4,0	0,3	185	149	1	1	0.287,NA	1.0,0.0	-0.213
283	ENSG00000126953.9	TIMM8A	chrX	-	101345660	101348401	101345660	101346660	101348532	101348742	283	21,4	57,44	3,3	4,1	298	149	0.0868474	0.303841	0.156,0.043	0.273,0.6	-0.337
307	ENSG00000126733.22	DACH2	chrX	+	86827765	86832602	86832105	86832602	86816033	86816099	307	2,0	1,0	2,0	0,0	298	149	1	1	0.5,NA	1.0,NA	-0.5
309	ENSG00000147180.18	ZNF711	chrX	+	85246929	85247651	85247531	85247651	85245902	85246022	309	15,27	0,2	9,12	0,0	298	149	0.573284	1	1.0,0.871	1.0,1.0	-0.065
310	ENSG00000147180.18	ZNF711	chrX	+	85246929	85247651	85247546	85247651	85245902	85246022	310	23,31	11,15	10,15	0,0	298	149	8.3875e-08	2.08669e-06	0.511,0.508	1.0,1.0	-0.49
311	ENSG00000147180.18	ZNF711	chrX	+	85247531	85247651	85247546	85247651	85245902	85246022	311	9,7	11,15	2,3	0,0	164	149	2.98348e-06	5.13257e-05	0.426,0.298	1.0,1.0	-0.638
312	ENSG00000147180.18	ZNF711	chrX	+	85247531	85247651	85247546	85247651	85246929	85247183	312	9,5	20,14	2,3	2,0	164	149	0.0114133	0.058613	0.29,0.245	0.476,1.0	-0.471
313	ENSG00000147180.18	ZNF711	chrX	+	85247531	85247651	85247546	85247651	85246929	85247188	313	9,5	2,7	2,3	0,0	164	149	1.92749e-05	0.000261137	0.803,0.394	1.0,1.0	-0.401
317	ENSG00000072133.13	RPS6KA6	chrX	-	84064970	84065111	84064970	84065072	84096193	84096311	317	23,13	0,5	7,6	0,0	188	149	0.00595509	0.0345576	1.0,0.673	1.0,1.0	-0.163
320	ENSG00000102390.13	PBDC1	chrX	+	76176880	76176992	76176883	76176992	76175472	76175613	320	72,75	0,4	11,15	0,0	152	149	0.658765	1	1.0,0.948	1.0,1.0	-0.026
323	ENSG00000147100.12	SLC16A2	chrX	+	74524358	74524809	74524640	74524809	74520989	74521134	323	30,35	1,0	2,1	0,0	298	149	1	1	0.938,1.0	1.0,1.0	-0.031
324	ENSG00000147100.12	SLC16A2	chrX	+	74524535	74524809	74524640	74524809	74520989	74521134	324	9,12	1,0	0,1	0,0	254	149	1	1	0.841,1.0	NA,1.0	-0.08
328	ENSG00000225470.10	JPX	chrX	+	73962730	73962801	73962734	73962801	73944583	73944662	328	2,2	0,0	7,7	1,0	153	149	1	1	1.0,1.0	0.872,1.0	0.064
330	ENSG00000225470.10	JPX	chrX	+	73994839	73994961	73994863	73994961	73944583	73944662	330	58,53	0,0	41,38	0,2	173	149	0.408357	0.970324	1.0,1.0	1.0,0.942	0.029
331	ENSG00000225470.10	JPX	chrX	+	73994845	73994961	73994863	73994961	73944583	73944662	331	9,2	0,0	11,13	0,2	167	149	0.691276	1	1.0,1.0	1.0,0.853	0.074
332	ENSG00000225470.10	JPX	chrX	+	73962730	73962801	73962734	73962801	73946998	73947374	332	1,1	2,2	5,4	0,0	153	149	1.58643e-05	0.000222085	0.327,0.327	1.0,1.0	-0.673
335	ENSG00000225470.10	JPX	chrX	+	73998767	74000496	73998953	74000496	73994839	73994961	335	77,75	2,0	48,37	0,0	298	149	0.469509	1	0.951,1.0	1.0,1.0	-0.024
336	ENSG00000225470.10	JPX	chrX	+	73998767	74000496	73999354	74000496	73994839	73994961	336	89,95	1,6	66,95	0,0	298	149	0.00528827	0.0312916	0.978,0.888	1.0,1.0	-0.067
338	ENSG00000225470.10	JPX	chrX	+	73998953	73999669	73999354	73999669	73994839	73994961	338	22,32	1,6	60,73	0,0	298	149	3.88359e-05	0.000476977	0.917,0.727	1.0,1.0	-0.178
343	ENSG00000225470.10	JPX	chrX	+	73998953	74000495	73999354	74000495	73998767	73998844	343	52,75	1,0	82,87	0,0	298	149	1	1	0.963,1.0	1.0,1.0	-0.018
345	ENSG00000230590.13	FTX	chrX	-	74202650	74203953	74202650	74203909	74274341	74274410	345	3,2	1,0	13,12	0,0	193	149	1	1	0.698,1.0	1.0,1.0	-0.151
348	ENSG00000230590.13	FTX	chrX	-	74274341	74274457	74274341	74274410	74280393	74280494	348	2,4	2,12	3,5	1,2	196	149	0.0120334	0.0611504	0.432,0.202	0.695,0.655	-0.358
355	ENSG00000147133.19	TAF1	chrX	+	71376949	71377191	71377012	71377191	71375166	71375286	355	46,30	3,1	27,28	5,0	212	149	0.68578	1	0.915,0.955	0.791,1.0	0.04
356	ENSG00000147133.19	TAF1	chrX	+	71392870	71392994	71392874	71392994	71392568	71392718	356	0,1	19,22	3,8	13,10	153	149	1.54564e-05	0.000217767	0.0,0.042	0.183,0.438	-0.289
357	ENSG00000147133.19	TAF1	chrX	+	71397252	71397466	71397255	71397466	71394066	71394245	357	14,26	2,0	27,28	0,2	152	149	0.450405	1	0.873,1.0	1.0,0.932	-0.029
358	ENSG00000147133.19	TAF1	chrX	+	71423973	71424066	71424016	71424066	71423116	71423239	358	41,37	3,0	12,8	2,0	192	149	0.623333	1	0.914,1.0	0.823,1.0	0.046
360	ENSG00000147130.15	ZMYM3	chrX	-	71251177	71251250	71251177	71251244	71251557	71251601	360	2,1	72,42	0,0	9,5	155	149	0.438058	1	0.026,0.022	0.0,0.0	0.024
371	ENSG00000131080.16	EDA2R	chrX	-	66599473	66599866	66599473	66599860	66602632	66602797	371	6,1	11,3	0,1	0,0	155	149	1	1	0.344,0.243	NA,1.0	-0.707
372	ENSG00000131080.16	EDA2R	chrX	-	66599473	66599866	66599473	66599860	66602723	66602797	372	0,4	8,10	0,1	2,2	155	149	0.0558166	0.214285	0.0,0.278	0.0,0.325	-0.023
377	ENSG00000131089.18	ARHGEF9	chrX	-	63655493	63658064	63655493	63655737	63665885	63666017	377	0,1	6,6	0,2	0,2	298	149	1	1	0.0,0.077	NA,0.333	-0.295
379	ENSG00000235437.11	LINC01278	chrX	-	63426557	63427072	63426557	63426996	63432363	63432491	379	11,7	41,11	8,6	4,0	225	149	0.000679573	0.00571045	0.151,0.296	0.57,1.0	-0.561
380	ENSG00000235437.11	LINC01278	chrX	-	63426557	63427259	63426557	63426996	63432363	63432491	380	21,17	41,11	20,19	4,0	298	149	1.81237e-05	0.000247441	0.204,0.436	0.714,1.0	-0.537
381	ENSG00000235437.11	LINC01278	chrX	-	63426557	63428981	63426557	63426996	63432363	63432491	381	33,22	41,11	21,21	4,0	298	149	7.56396e-05	0.000856033	0.287,0.5	0.724,1.0	-0.469
394	ENSG00000158526.9	TSR2	chrX	+	54444007	54444184	54444016	54444184	54443399	54443491	394	83,84	2,1	3,8	0,0	158	149	0.539714	1	0.975,0.988	1.0,1.0	-0.018
397	ENSG00000172943.22	PHF8	chrX	-	54014376	54014620	54014376	54014563	54016594	54016736	397	0,5	59,71	2,2	17,15	206	149	0.314726	0.811862	0.0,0.048	0.078,0.088	-0.059
398	ENSG00000172943.22	PHF8	chrX	-	54042630	54042836	54042630	54042820	54043761	54043949	398	1,1	84,55	7,5	20,26	165	149	1.53212e-06	2.84057e-05	0.011,0.016	0.24,0.148	-0.18
399	ENSG00000172943.22	PHF8	chrX	-	54042630	54042820	54042630	54042809	54043761	54044473	399	99,66	2,0	23,34	0,2	160	149	0.337993	0.853278	0.979,1.0	1.0,0.941	0.019
400	ENSG00000172943.22	PHF8	chrX	-	54042630	54042820	54042630	54042809	54043811	54044116	400	19,12	0,1	3,10	0,0	160	149	1	1	1.0,0.918	1.0,1.0	-0.041
402	ENSG00000184205.15	TSPYL2	chrX	+	53084511	53084622	53084544	53084622	53082366	53083305	402	1,8	47,25	2,3	1,4	182	149	0.0299577	0.129037	0.017,0.208	0.621,0.38	-0.388
412	ENSG00000184205.15	TSPYL2	chrX	+	53085555	53086310	53085630	53086310	53085226	53085321	412	10,2	38,34	5,1	17,16	224	149	0.93322	1	0.149,0.038	0.164,0.04	-0.009
415	ENSG00000184205.15	TSPYL2	chrX	+	53085612	53086310	53085630	53086310	53085226	53085321	415	9,2	38,34	0,1	17,16	167	149	0.00216723	0.0150702	0.174,0.05	0.0,0.053	0.085
417	ENSG00000184205.15	TSPYL2	chrX	+	53085618	53086310	53085630	53086310	53085226	53085321	417	9,2	38,34	0,1	17,16	161	149	0.00207294	0.0145676	0.18,0.052	0.0,0.055	0.088
432	ENSG00000179222.19	MAGED1	chrX	+	51897180	51897271	51897207	51897271	51896408	51897077	432	1,0	179,117	2,2	9,5	176	149	0.0133354	0.0663305	0.005,0.0	0.158,0.253	-0.203
433	ENSG00000179222.19	MAGED1	chrX	+	51897522	51897626	51897546	51897626	51897207	51897271	433	1,0	237,159	0,1	9,11	173	149	1	1	0.004,0.0	0.0,0.073	-0.034
439	ENSG00000101997.14	CCDC22	chrX	+	49243093	49243184	49243117	49243184	49242885	49242992	439	2,0	34,24	0,0	6,7	173	149	0.404598	0.964383	0.048,0.0	0.0,0.0	0.024
444	ENSG00000101997.14	CCDC22	chrX	+	49249490	49249568	49249508	49249568	49249166	49249262	444	3,1	36,29	1,0	2,9	167	149	0.263669	0.710638	0.069,0.03	0.308,0.0	-0.104
451	ENSG00000068323.18	TFE3	chrX	-	49039106	49039410	49039106	49039345	49040454	49040568	451	43,30	4,2	2,6	1,0	214	149	0.0562504	0.215439	0.882,0.913	0.582,1.0	0.107
456	ENSG00000068400.15	GRIPAP1	chrX	-	48975154	48975309	48975154	48975291	48976017	48976111	456	17,15	0,2	6,7	0,0	167	149	0.69848	1	1.0,0.87	1.0,1.0	-0.065
457	ENSG00000068400.15	GRIPAP1	chrX	-	48975154	48975324	48975154	48975291	48976017	48976111	457	1,4	0,2	9,6	0,0	182	149	0.603073	1	1.0,0.621	1.0,1.0	-0.19
458	ENSG00000068400.15	GRIPAP1	chrX	-	48975154	48975613	48975154	48975291	48976017	48976111	458	4,7	0,2	27,9	0,0	298	149	0.618351	1	1.0,0.636	1.0,1.0	-0.182
459	ENSG00000068400.15	GRIPAP1	chrX	-	48975154	48975324	48975154	48975309	48976017	48976111	459	0,2	16,13	4,3	1,4	164	149	0.000102898	0.00111926	0.0,0.123	0.784,0.405	-0.533
460	ENSG00000068400.15	GRIPAP1	chrX	-	48975154	48975613	48975154	48975309	48976017	48976111	460	3,5	16,13	22,6	1,4	298	149	9.0664e-05	0.00100344	0.086,0.161	0.917,0.429	-0.55
462	ENSG00000068400.15	GRIPAP1	chrX	-	48976017	48976132	48976017	48976111	48976240	48976363	462	0,1	3,4	3,6	4,8	170	149	0.000851024	0.00691866	0.0,0.18	0.397,0.397	-0.307
473	ENSG00000068400.15	GRIPAP1	chrX	-	48982978	48983141	48982978	48983092	48983227	48983440	473	0,1	11,5	1,0	26,20	198	149	1	1	0.0,0.131	0.028,0.0	0.052
476	ENSG00000068400.15	GRIPAP1	chrX	-	48983227	48983470	48983227	48983440	48983774	48983870	476	0,0	1,10	1,1	19,31	179	149	0.352463	0.879736	0.0,0.0	0.042,0.026	-0.034
481	ENSG00000068400.15	GRIPAP1	chrX	-	48990925	48991239	48990925	48991110	48993427	48993578	481	10,0	34,16	11,11	14,22	278	149	0.00784225	0.0434629	0.136,0.0	0.296,0.211	-0.185
482	ENSG00000068400.15	GRIPAP1	chrX	-	48990925	48991110	48990925	48991102	48993427	48994207	482	34,16	0,0	15,23	2,0	157	149	0.811589	1	1.0,1.0	0.877,1.0	0.061
485	ENSG00000068400.15	GRIPAP1	chrX	-	48998153	48998207	48998153	48998180	48999237	48999299	485	1,0	25,32	1,3	22,31	176	149	0.10821	0.358419	0.033,0.0	0.037,0.076	-0.04
491	ENSG00000102312.25	PORCN	chrX	+	48509783	48509956	48509892	48509956	48508965	48509103	491	17,14	1,0	9,6	0,0	258	149	1	1	0.908,1.0	1.0,1.0	-0.046
493	ENSG00000102312.25	PORCN	chrX	+	48509423	48509956	48509783	48509956	48508991	48509103	493	7,3	6,5	7,4	0,2	298	149	0.00980965	0.0518112	0.368,0.231	1.0,0.5	-0.451
494	ENSG00000102312.25	PORCN	chrX	+	48509567	48509956	48509783	48509956	48508991	48509103	494	5,2	6,5	5,4	0,2	298	149	0.00685772	0.0388506	0.294,0.167	1.0,0.5	-0.52
496	ENSG00000102312.25	PORCN	chrX	+	48511294	48511487	48511365	48511487	48509567	48509956	496	10,12	6,3	6,1	0,1	220	149	0.0082019	0.0450284	0.53,0.73	1.0,0.404	-0.072
498	ENSG00000102312.25	PORCN	chrX	+	48512834	48514365	48514239	48514365	48512588	48512719	498	0,4	10,1	4,2	1,0	298	149	0.000287186	0.00274439	0.0,0.667	0.667,1.0	-0.5
499	ENSG00000102312.25	PORCN	chrX	+	48514239	48514365	48514281	48514365	48512834	48512852	499	1,1	2,0	1,3	0,0	191	149	0.273184	0.729927	0.281,1.0	1.0,1.0	-0.359
501	ENSG00000068438.16	FTSJ1	chrX	+	48477934	48478168	48477960	48478168	48476229	48476396	501	2,1	165,109	0,1	23,22	175	149	1	1	0.01,0.008	0.0,0.037	-0.009
505	ENSG00000068438.16	FTSJ1	chrX	+	48482402	48482506	48482408	48482506	48481631	48481715	505	142,173	52,61	16,1	10,2	155	149	0.220606	0.618871	0.724,0.732	0.606,0.325	0.262
508	ENSG00000068438.16	FTSJ1	chrX	+	48482596	48482794	48482662	48482794	48482402	48482506	508	279,299	3,0	43,41	0,0	215	149	1	1	0.985,1.0	1.0,1.0	-0.008
511	ENSG00000068438.16	FTSJ1	chrX	+	48482638	48482794	48482662	48482794	48482408	48482506	511	44,7	3,0	1,4	0,0	173	149	0.474048	1	0.927,1.0	1.0,1.0	-0.036
520	ENSG00000102226.11	USP11	chrX	+	47240274	47240450	47240304	47240450	47239789	47239907	520	2,3	195,162	0,1	36,30	179	149	1	1	0.008,0.015	0.0,0.027	-0.002
523	ENSG00000102226.11	USP11	chrX	+	47241540	47241699	47241585	47241699	47241276	47241450	523	239,134	2,0	12,14	0,0	194	149	1	1	0.989,1.0	1.0,1.0	-0.006
526	ENSG00000102226.11	USP11	chrX	+	47241546	47241699	47241585	47241699	47241276	47241450	526	23,10	2,0	4,3	0,0	188	149	0.439456	1	0.901,1.0	1.0,1.0	-0.049
532	ENSG00000102226.11	USP11	chrX	+	47242081	47242306	47242093	47242306	47241540	47241699	532	132,115	1,2	14,16	0,0	161	149	1	1	0.992,0.982	1.0,1.0	-0.013
533	ENSG00000102226.11	USP11	chrX	+	47242084	47242306	47242093	47242306	47241540	47241699	533	22,8	1,2	0,2	0,0	158	149	1	1	0.954,0.79	NA,1.0	-0.128
534	ENSG00000102226.11	USP11	chrX	+	47244681	47244924	47244684	47244924	47244497	47244550	534	196,117	21,3	21,30	0,0	152	149	0.000579397	0.00499262	0.901,0.975	1.0,1.0	-0.062
537	ENSG00000307069.1	ENSG00000307069	chrX	-	47125749	47125850	47125749	47125843	47126245	47126375	537	0,1	0,0	0,0	0,2	156	149	1	1	NA,1.0	NA,0.0	1
544	ENSG00000215301.12	DDX3X	chrX	+	41337690	41339083	41339035	41339083	41337407	41337465	544	14,26	753,707	30,26	43,41	298	149	0	0	0.009,0.018	0.259,0.241	-0.236
545	ENSG00000215301.12	DDX3X	chrX	+	41337690	41339083	41339038	41339083	41337407	41337465	545	18,31	13,21	29,24	0,0	298	149	8.53984e-13	5.35727e-11	0.409,0.425	1.0,1.0	-0.583
546	ENSG00000215301.12	DDX3X	chrX	+	41339035	41339083	41339038	41339083	41337407	41337465	546	759,716	13,21	45,43	0,0	152	149	0.0319101	0.135954	0.983,0.971	1.0,1.0	-0.023
547	ENSG00000215301.12	DDX3X	chrX	+	41343215	41343351	41343220	41343351	41342736	41342836	547	756,927	0,2	79,76	0,0	154	149	1	1	1.0,0.998	1.0,1.0	-0.001
551	ENSG00000215301.12	DDX3X	chrX	+	41346493	41346622	41346504	41346622	41346228	41346410	551	0,1	1213,1169	1,0	123,121	160	149	1	1	0.0,0.001	0.008,0.0	-0.004
552	ENSG00000215301.12	DDX3X	chrX	+	41346504	41346622	41346508	41346622	41346319	41346410	552	1264,1220	2,2	124,126	0,0	153	149	1	1	0.998,0.998	1.0,1.0	-0.002
553	ENSG00000215301.12	DDX3X	chrX	+	41346858	41347012	41346930	41347012	41346504	41346622	553	1113,1190	1,0	155,175	0,0	221	149	1	1	0.999,1.0	1.0,1.0	0
554	ENSG00000215301.12	DDX3X	chrX	+	41347311	41347427	41347314	41347427	41346858	41347012	554	410,508	151,197	55,44	14,21	152	149	0.69652	1	0.727,0.717	0.794,0.673	-0.012
555	ENSG00000215301.12	DDX3X	chrX	+	41347311	41347451	41347317	41347451	41346858	41347012	555	426,529	1,0	58,45	0,0	155	149	1	1	0.998,1.0	1.0,1.0	-0.001
556	ENSG00000215301.12	DDX3X	chrX	+	41347311	41349886	41347639	41349886	41346858	41347012	556	407,514	0,0	85,95	1,0	298	149	1	1	1.0,1.0	0.977,1.0	0.012
557	ENSG00000215301.12	DDX3X	chrX	+	41347314	41347451	41347317	41347451	41346858	41347012	557	167,218	1,0	17,22	0,0	152	149	1	1	0.994,1.0	1.0,1.0	-0.003
558	ENSG00000215301.12	DDX3X	chrX	+	41347639	41347915	41347859	41347915	41347311	41347451	558	1641,2002	0,1	177,205	0,0	298	149	1	1	1.0,0.999	1.0,1.0	0
560	ENSG00000185753.14	CXorf38	chrX	-	40626922	40630162	40626922	40628455	40630613	40630773	560	82,64	0,1	12,13	0,0	298	149	1	1	1.0,0.97	1.0,1.0	-0.015
561	ENSG00000185753.14	CXorf38	chrX	-	40639008	40640320	40639008	40639128	40647006	40647141	561	6,7	23,13	6,7	0,4	298	149	0.00253683	0.0171487	0.115,0.212	1.0,0.467	-0.57
575	ENSG00000182220.16	ATP6AP2	chrX	+	40605560	40606619	40605563	40606619	40600761	40600881	575	111,90	1,5	7,5	0,0	152	149	0.16548	0.497602	0.991,0.946	1.0,1.0	-0.032
580	ENSG00000184831.15	APOO	chrX	-	23833352	23833606	23833352	23833510	23840312	23840377	580	3,7	10,22	4,7	0,0	245	149	5.85846e-10	2.2859e-08	0.154,0.162	1.0,1.0	-0.842
581	ENSG00000184831.15	APOO	chrX	-	23833352	23833612	23833352	23833510	23840312	23840377	581	42,30	10,22	4,7	0,0	251	149	1.251e-05	0.000180787	0.714,0.447	1.0,1.0	-0.419
590	ENSG00000131828.15	PDHA1	chrX	+	19351259	19351407	19351280	19351407	19349936	19350110	590	7,12	445,427	0,1	45,37	170	149	0.164163	0.494153	0.014,0.024	0.0,0.023	0.007
591	ENSG00000131828.15	PDHA1	chrX	+	19351259	19351407	19351284	19351407	19349936	19350110	591	21,16	0,0	1,4	0,2	174	149	0.621482	1	1.0,1.0	1.0,0.631	0.184
592	ENSG00000131828.15	PDHA1	chrX	+	19351280	19351407	19351284	19351407	19349936	19350110	592	459,431	0,0	46,40	0,2	153	149	0.545478	1	1.0,1.0	1.0,0.951	0.024
593	ENSG00000131828.15	PDHA1	chrX	+	19353039	19353173	19353081	19353173	19351280	19351407	593	1,3	131,133	5,3	12,9	191	149	4.85569e-06	7.86092e-05	0.006,0.017	0.245,0.206	-0.214
596	ENSG00000131828.15	PDHA1	chrX	+	19355348	19355504	19355354	19355504	19354490	19354583	596	324,290	0,3	18,14	0,0	155	149	1	1	1.0,0.989	1.0,1.0	-0.006
600	ENSG00000086712.14	TXLNG	chrX	+	16829575	16829770	16829590	16829770	16828093	16828264	600	117,227	0,6	26,35	0,0	164	149	0.889371	1	1.0,0.972	1.0,1.0	-0.014
603	ENSG00000169895.7	SYAP1	chrX	+	16741715	16741789	16741718	16741789	16736165	16736232	603	85,120	0,0	22,18	1,0	152	149	1	1	1.0,1.0	0.956,1.0	0.022
604	ENSG00000169895.7	SYAP1	chrX	+	16741715	16741789	16741721	16741789	16736165	16736232	604	85,120	4,6	22,18	0,0	155	149	0.0133922	0.0665678	0.953,0.951	1.0,1.0	-0.048
605	ENSG00000169895.7	SYAP1	chrX	+	16741718	16741789	16741721	16741789	16736165	16736232	605	0,0	4,6	1,0	0,0	152	149	1	1	0.0,0.0	1.0,NA	-1
606	ENSG00000169895.7	SYAP1	chrX	+	16756662	16756721	16756668	16756721	16754944	16755093	606	286,244	2,6	31,15	0,0	155	149	0.920351	1	0.993,0.975	1.0,1.0	-0.016
612	ENSG00000169249.15	ZRSR2	chrX	+	15822730	15823201	15822844	15823201	15820206	15820316	612	32,38	0,0	14,14	0,1	263	149	1	1	1.0,1.0	1.0,0.888	0.056
623	ENSG00000046647.16	GEMIN8	chrX	-	14020077	14020534	14020077	14020358	14021463	14021511	623	47,22	1,0	4,2	0,0	298	149	1	1	0.959,1.0	1.0,1.0	-0.02
625	ENSG00000196459.16	TRAPPC2	chrX	-	13719870	13720497	13719870	13719982	13734043	13734185	625	4,1	16,17	20,11	3,9	298	149	7.18301e-06	0.000112169	0.111,0.029	0.769,0.379	-0.504
626	ENSG00000176896.10	TCEANC	chrX	+	13655242	13655373	13655288	13655373	13653140	13653188	626	2,0	5,3	0,1	0,0	195	149	1	1	0.234,0.0	NA,1.0	-0.883
629	ENSG00000176896.10	TCEANC	chrX	+	13659651	13661122	13660865	13661122	13655288	13655373	629	6,4	0,0	0,1	0,2	298	149	1	1	1.0,1.0	NA,0.2	0.8
636	ENSG00000176896.10	TCEANC	chrX	+	13660865	13661122	13661027	13661122	13659651	13659768	636	11,8	7,0	2,2	0,0	298	149	0.000745594	0.00619724	0.44,1.0	1.0,1.0	-0.28
639	ENSG00000205542.12	TMSB4X	chrX	+	12976190	12976361	12976245	12976361	12975109	12975168	639	5,7	142,92	2,0	6,1	204	149	0.620174	1	0.025,0.053	0.196,0.0	-0.059
645	ENSG00000130021.16	PUDP	chrX	-	7048919	7050502	7048919	7050472	7077219	7077449	645	3,5	135,94	0,1	1,3	179	149	0.247196	0.67702	0.018,0.042	0.0,0.217	-0.079
647	ENSG00000101986.13	ABCD1	chrX	+	153736611	153736911	153736641	153736911	153736344	153736513	647	3,0	1,0	3,2	0,0	179	149	1	1	0.714,NA	1.0,1.0	-0.286
666	ENSG00000291064.2	ENSG00000291064	chr22	+	50788749	50789179	50788891	50789179	50785172	50785293	666	10,4	4,2	1,0	0,0	291	149	1	1	0.561,0.506	1.0,NA	-0.466
667	ENSG00000291064.2	ENSG00000291064	chr22	+	50788749	50789179	50788894	50789179	50785172	50785293	667	10,4	1,0	1,0	0,0	294	149	1	1	0.835,1.0	1.0,NA	-0.083
671	ENSG00000251322.12	SHANK3	chr22	+	50705375	50706152	50706071	50706152	50704963	50705096	671	8,8	47,30	7,16	5,3	298	149	7.55226e-06	0.000117306	0.078,0.118	0.412,0.727	-0.472
672	ENSG00000008735.15	MAPK8IP2	chr22	+	50603222	50603498	50603276	50603498	50601788	50601894	672	47,47	0,1	9,10	0,0	203	149	1	1	1.0,0.972	1.0,1.0	-0.014
674	ENSG00000008735.15	MAPK8IP2	chr22	+	50603837	50605064	50603840	50605064	50603625	50603719	674	2,1	15,0	0,6	0,4	152	149	1	1	0.116,1.0	NA,0.595	-0.037
675	ENSG00000008735.15	MAPK8IP2	chr22	+	50603837	50605064	50603951	50605064	50603625	50603719	675	15,7	0,1	2,6	0,0	263	149	1	1	1.0,0.799	1.0,1.0	-0.101
676	ENSG00000008735.15	MAPK8IP2	chr22	+	50603837	50605064	50603972	50605064	50603625	50603719	676	15,8	1,0	2,6	0,0	284	149	1	1	0.887,1.0	1.0,1.0	-0.056
677	ENSG00000008735.15	MAPK8IP2	chr22	+	50603840	50605064	50603951	50605064	50603625	50603719	677	28,6	0,1	2,4	0,0	260	149	1	1	1.0,0.775	1.0,1.0	-0.113
678	ENSG00000008735.15	MAPK8IP2	chr22	+	50603840	50605064	50603972	50605064	50603625	50603719	678	28,7	1,0	2,4	0,0	281	149	1	1	0.937,1.0	1.0,1.0	-0.031
680	ENSG00000008735.15	MAPK8IP2	chr22	+	50605540	50605734	50605561	50605734	50605367	50605443	680	3,1	43,41	0,0	1,6	170	149	0.351788	0.878654	0.058,0.021	0.0,0.0	0.04
682	ENSG00000100288.21	CHKB	chr22	-	50579726	50579830	50579726	50579802	50579973	50580082	682	11,18	8,3	26,36	3,20	177	149	0.830239	1	0.536,0.835	0.879,0.602	-0.055
683	ENSG00000100288.21	CHKB	chr22	-	50581419	50581567	50581419	50581553	50581748	50581862	683	3,1	21,29	0,3	8,13	163	149	0.686464	1	0.116,0.031	0.0,0.174	-0.013
686	ENSG00000205560.15	CPT1B	chr22	-	50568860	50569101	50568860	50569081	50569335	50569421	686	0,0	6,7	0,1	9,13	169	149	1	1	0.0,0.0	0.0,0.064	-0.032
691	ENSG00000205560.15	CPT1B	chr22	-	50571374	50571533	50571374	50571509	50572005	50572122	691	9,0	0,4	4,1	0,4	173	149	0.81927	1	1.0,0.0	1.0,0.177	-0.089
692	ENSG00000205560.15	CPT1B	chr22	-	50571374	50571539	50571374	50571509	50572005	50572122	692	41,13	0,4	18,18	0,4	179	149	0.541798	1	1.0,0.73	1.0,0.789	-0.03
695	ENSG00000205560.15	CPT1B	chr22	-	50574334	50574400	50574334	50574380	50574492	50574600	695	1,0	1,0	1,2	0,0	169	149	1	1	0.469,NA	1.0,1.0	-0.531
696	ENSG00000205560.15	CPT1B	chr22	-	50574334	50574419	50574334	50574380	50574492	50574600	696	31,20	1,0	48,45	0,0	188	149	1	1	0.961,1.0	1.0,1.0	-0.02
698	ENSG00000254413.8	CHKB-CPT1B	chr22	-	50576535	50576637	50576535	50576593	50576856	50577034	698	31,26	0,0	37,32	0,1	193	149	1	1	1.0,1.0	1.0,0.961	0.02
699	ENSG00000205560.15	CPT1B	chr22	-	50576535	50576658	50576535	50576593	50576856	50577034	699	9,11	0,0	23,22	0,1	214	149	1	1	1.0,1.0	1.0,0.939	0.03
700	ENSG00000205560.15	CPT1B	chr22	-	50576535	50576658	50576535	50576637	50576856	50577034	700	0,2	22,17	3,3	17,13	170	149	0.0199851	0.0934952	0.0,0.093	0.134,0.168	-0.105
702	ENSG00000205560.15	CPT1B	chr22	-	50577323	50577484	50577323	50577463	50577774	50577934	702	0,0	16,19	1,1	34,52	170	149	0.764046	1	0.0,0.0	0.025,0.017	-0.021
710	ENSG00000025770.20	NCAPH2	chr22	+	50519189	50519320	50519201	50519320	50518648	50518732	710	107,47	1,1	30,21	0,0	161	149	1	1	0.99,0.978	1.0,1.0	-0.016
711	ENSG00000025770.20	NCAPH2	chr22	+	50521518	50521609	50521542	50521609	50520964	50521036	711	1,1	73,29	4,4	10,8	173	149	1.00855e-05	0.000151013	0.012,0.029	0.256,0.301	-0.258
714	ENSG00000025770.20	NCAPH2	chr22	+	50521719	50521848	50521740	50521848	50521542	50521609	714	0,1	48,28	0,0	21,22	170	149	1	1	0.0,0.03	0.0,0.0	0.015
716	ENSG00000025770.20	NCAPH2	chr22	+	50522497	50522569	50522500	50522569	50522342	50522415	716	3,15	91,47	0,4	23,15	152	149	0.334623	0.847739	0.031,0.238	0.0,0.207	0.031
724	ENSG00000025770.20	NCAPH2	chr22	+	50523016	50523166	50523022	50523166	50522820	50522922	724	107,69	12,9	19,33	0,4	155	149	0.144702	0.449901	0.896,0.881	1.0,0.888	-0.055
725	ENSG00000025770.20	NCAPH2	chr22	+	50523016	50523166	50523058	50523166	50522820	50522922	725	178,130	1,0	39,49	0,0	191	149	1	1	0.993,1.0	1.0,1.0	-0.004
728	ENSG00000025770.20	NCAPH2	chr22	+	50523019	50523166	50523058	50523166	50522820	50522922	728	71,61	1,0	20,16	0,0	188	149	1	1	0.983,1.0	1.0,1.0	-0.008
730	ENSG00000025770.20	NCAPH2	chr22	+	50523022	50523166	50523058	50523166	50522820	50522922	730	83,70	1,0	20,20	0,0	185	149	1	1	0.985,1.0	1.0,1.0	-0.008
734	ENSG00000025770.20	NCAPH2	chr22	+	50523234	50523472	50523264	50523472	50523016	50523166	734	143,108	2,0	33,23	0,0	179	149	1	1	0.983,1.0	1.0,1.0	-0.008
738	ENSG00000100258.19	LMF2	chr22	-	50504339	50504451	50504339	50504434	50504558	50504727	738	103,49	0,4	4,4	1,1	166	149	0.460989	1	1.0,0.917	0.782,0.782	0.176
742	ENSG00000100258.19	LMF2	chr22	-	50505228	50505334	50505228	50505317	50505402	50505537	742	44,17	1,0	6,10	0,0	166	149	1	1	0.975,1.0	1.0,1.0	-0.012
743	ENSG00000100258.19	LMF2	chr22	-	50505673	50505803	50505673	50505722	50506034	50506213	743	37,50	1,0	10,10	0,0	230	149	1	1	0.96,1.0	1.0,1.0	-0.02
744	ENSG00000100258.19	LMF2	chr22	-	50505673	50505815	50505673	50505722	50506034	50506213	744	119,177	1,0	54,44	0,0	242	149	1	1	0.987,1.0	1.0,1.0	-0.006
745	ENSG00000100258.19	LMF2	chr22	-	50505673	50505815	50505673	50505803	50506034	50506213	745	82,130	0,3	44,34	0,0	161	149	0.906274	1	1.0,0.976	1.0,1.0	-0.012
747	ENSG00000100239.17	PPP6R2	chr22	+	50388985	50389111	50389033	50389111	50372019	50372150	747	10,8	2,1	6,17	1,0	197	149	0.0785849	0.281221	0.791,0.858	0.819,1.0	-0.085
749	ENSG00000100239.17	PPP6R2	chr22	+	50406688	50406875	50406734	50406875	50393892	50394135	749	86,81	2,0	63,57	3,2	195	149	0.0834283	0.294427	0.97,1.0	0.941,0.956	0.037
753	ENSG00000100239.17	PPP6R2	chr22	+	50419345	50419462	50419348	50419462	50416091	50416157	753	3,5	4,3	0,0	11,11	152	149	2.0339e-07	4.69863e-06	0.424,0.62	0.0,0.0	0.522
754	ENSG00000100239.17	PPP6R2	chr22	+	50419345	50419462	50419348	50419462	50418866	50418979	754	3,8	57,50	1,0	15,29	152	149	0.00337227	0.0217457	0.049,0.136	0.061,0.0	0.062
755	ENSG00000100239.17	PPP6R2	chr22	+	50423461	50423614	50423464	50423614	50422253	50422380	755	130,83	3,0	80,74	0,0	152	149	0.959436	1	0.977,1.0	1.0,1.0	-0.012
756	ENSG00000100239.17	PPP6R2	chr22	+	50437505	50437603	50437523	50437603	50436366	50436452	756	41,23	3,0	6,7	0,0	167	149	0.796686	1	0.924,1.0	1.0,1.0	-0.038
759	ENSG00000100239.17	PPP6R2	chr22	+	50439697	50439857	50439700	50439857	50438598	50438762	759	1,2	65,41	1,0	12,24	152	149	0.58316	1	0.015,0.046	0.076,0.0	-0.007
760	ENSG00000100239.17	PPP6R2	chr22	+	50439930	50440049	50439960	50440049	50439700	50439857	760	0,0	68,43	3,0	32,27	179	149	0.551689	1	0.0,0.0	0.072,0.0	-0.036
761	ENSG00000100239.17	PPP6R2	chr22	+	50440800	50441026	50440821	50441026	50439960	50440049	761	0,0	109,60	2,0	27,28	170	149	0.376034	0.91918	0.0,0.0	0.061,0.0	-0.03
762	ENSG00000100239.17	PPP6R2	chr22	+	50444198	50445090	50444202	50445090	50443865	50444117	762	56,40	0,0	27,30	0,1	153	149	1	1	1.0,1.0	1.0,0.967	0.016
767	ENSG00000196576.17	PLXNB2	chr22	-	50278854	50279011	50278854	50278933	50279629	50279776	767	246,133	0,1	44,41	0,0	227	149	1	1	1.0,0.989	1.0,1.0	-0.006
768	ENSG00000196576.17	PLXNB2	chr22	-	50283049	50283186	50283049	50283183	50283336	50283445	768	187,57	0,1	27,41	0,0	152	149	1	1	1.0,0.982	1.0,1.0	-0.009
769	ENSG00000196576.17	PLXNB2	chr22	-	50284131	50284244	50284131	50284213	50284572	50284665	769	4,3	177,195	1,1	15,24	180	149	0.352053	0.879165	0.018,0.013	0.052,0.033	-0.027
772	ENSG00000100429.19	HDAC10	chr22	-	50248224	50248472	50248224	50248292	50248661	50248751	772	17,7	0,0	13,21	0,1	298	149	1	1	1.0,1.0	1.0,0.913	0.043
773	ENSG00000100429.19	HDAC10	chr22	-	50248830	50248890	50248830	50248859	50249102	50249168	773	9,3	1,0	0,7	3,4	180	149	9.53661e-05	0.0010491	0.882,1.0	0.0,0.592	0.645
774	ENSG00000100429.19	HDAC10	chr22	-	50248830	50248890	50248830	50248859	50249327	50249454	774	2,0	2,0	0,7	0,0	180	149	1	1	0.453,NA	NA,1.0	-0.547
775	ENSG00000100429.19	HDAC10	chr22	-	50249102	50249198	50249102	50249168	50249327	50249454	775	1,0	6,12	2,0	5,2	179	149	0.838445	1	0.122,0.0	0.25,0.0	-0.064
776	ENSG00000100429.19	HDAC10	chr22	-	50249327	50249516	50249327	50249454	50249634	50249703	776	7,7	18,18	14,5	7,13	211	149	0.149894	0.461411	0.215,0.215	0.585,0.214	-0.184
777	ENSG00000100429.19	HDAC10	chr22	-	50249634	50249719	50249634	50249703	50249859	50249964	777	1,0	25,16	1,0	10,21	165	149	1	1	0.035,0.0	0.083,0.0	-0.024
779	ENSG00000170638.11	TRABD	chr22	+	50194899	50195040	50194968	50195040	50194339	50194506	779	247,153	2,1	59,71	1,0	218	149	1	1	0.988,0.991	0.976,1.0	0.002
780	ENSG00000170638.11	TRABD	chr22	+	50197436	50197588	50197448	50197588	50197240	50197351	780	5,7	149,53	4,7	45,45	161	149	0.162571	0.490376	0.03,0.109	0.076,0.126	-0.032
786	ENSG00000170638.11	TRABD	chr22	+	50197822	50198186	50198074	50198186	50197448	50197588	786	333,223	3,2	148,184	1,0	298	149	0.612102	1	0.982,0.982	0.987,1.0	-0.012
787	ENSG00000170638.11	TRABD	chr22	+	50197822	50197995	50197826	50197995	50197511	50197588	787	270,192	13,5	62,79	6,21	153	149	1.09301e-05	0.000162323	0.953,0.974	0.91,0.786	0.115
791	ENSG00000198355.6	PIM3	chr22	+	49961441	49961811	49961654	49961811	49961317	49961368	791	390,161	1,6	23,25	0,0	298	149	0.197098	0.568934	0.995,0.931	1.0,1.0	-0.037
793	ENSG00000198355.6	PIM3	chr22	+	49961567	49961811	49961654	49961811	49961317	49961368	793	68,32	1,6	8,6	0,0	236	149	0.00291833	0.0193765	0.977,0.771	1.0,1.0	-0.126
794	ENSG00000198355.6	PIM3	chr22	+	49961627	49961811	49961654	49961811	49961317	49961368	794	11,1	1,6	4,2	0,0	176	149	0.000242475	0.00236052	0.903,0.124	1.0,1.0	-0.486
797	ENSG00000184164.16	CRELD2	chr22	+	49923134	49923317	49923233	49923317	49922611	49922707	797	0,0	27,38	5,0	4,2	248	149	0.00327558	0.0212351	0.0,0.0	0.429,0.0	-0.214
801	ENSG00000100425.21	BRD1	chr22	-	49787389	49787518	49787389	49787494	49794033	49794294	801	3,0	40,13	3,1	1,3	173	149	0.00891352	0.048065	0.061,0.0	0.721,0.223	-0.442
802	ENSG00000100425.21	BRD1	chr22	-	49787389	49787522	49787389	49787494	49794033	49794294	802	6,0	40,13	3,3	1,3	177	149	0.00184351	0.0132561	0.112,0.0	0.716,0.457	-0.53
803	ENSG00000100425.21	BRD1	chr22	-	49787389	49787887	49787389	49787494	49794033	49794294	803	65,71	40,13	30,32	1,3	298	149	0.00075037	0.00623339	0.448,0.732	0.938,0.842	-0.3
806	ENSG00000100425.21	BRD1	chr22	-	49787389	49787887	49787389	49787522	49794033	49794294	806	65,74	3,0	27,32	0,2	298	149	0.666913	1	0.915,1.0	1.0,0.889	0.013
807	ENSG00000100425.21	BRD1	chr22	-	49798557	49798686	49798557	49798680	49798987	49799119	807	108,132	3,4	57,41	1,2	155	149	0.694071	1	0.972,0.969	0.982,0.952	0.003
810	ENSG00000186951.18	PPARA	chr22	+	46198341	46198591	46198344	46198591	46151887	46151970	810	2,0	7,2	0,2	0,2	152	149	1	1	0.219,0.0	NA,0.495	-0.386
811	ENSG00000186951.18	PPARA	chr22	+	46198341	46198591	46198344	46198591	46176752	46176836	811	2,4	0,4	0,0	4,0	152	149	1	1	1.0,0.495	0.0,NA	0.748
817	ENSG00000100364.20	KIAA0930	chr22	-	45202989	45203184	45202989	45203133	45203844	45203985	817	239,204	0,2	15,6	0,0	200	149	1	1	1.0,0.987	1.0,1.0	-0.006
820	ENSG00000093000.20	NUP50	chr22	+	45178237	45178900	45178279	45178900	45175893	45176080	820	423,370	1,1	18,15	0,0	191	149	1	1	0.997,0.997	1.0,1.0	-0.003
821	ENSG00000093000.20	NUP50	chr22	+	45178237	45178900	45178590	45178900	45175893	45176080	821	580,702	0,2	61,43	0,0	298	149	1	1	1.0,0.994	1.0,1.0	-0.003
822	ENSG00000093000.20	NUP50	chr22	+	45178237	45178900	45178630	45178900	45175893	45176080	822	549,650	0,1	57,36	0,0	298	149	1	1	1.0,0.997	1.0,1.0	-0.002
823	ENSG00000093000.20	NUP50	chr22	+	45178279	45178900	45178590	45178900	45175893	45176080	823	250,416	0,2	50,36	0,0	298	149	1	1	1.0,0.99	1.0,1.0	-0.005
824	ENSG00000093000.20	NUP50	chr22	+	45178279	45178900	45178630	45178900	45175893	45176080	824	219,364	0,1	46,29	0,0	298	149	1	1	1.0,0.995	1.0,1.0	-0.002
825	ENSG00000093000.20	NUP50	chr22	+	45178590	45178900	45178630	45178900	45175893	45176080	825	10,20	0,1	3,2	0,0	189	149	1	1	1.0,0.94	1.0,1.0	-0.03
826	ENSG00000056487.18	PHF21B	chr22	-	44913821	44914088	44913821	44913962	44916279	44916630	826	3,0	1,6	0,0	5,1	275	149	0.108726	0.359471	0.619,0.0	0.0,0.0	0.309
827	ENSG00000186654.22	PRR5	chr22	+	44731678	44731821	44731729	44731821	44726576	44726634	827	2,5	17,3	0,0	0,1	200	149	1	1	0.081,0.554	NA,0.0	0.318
829	ENSG00000186654.22	PRR5	chr22	+	44731729	44731821	44731734	44731821	44726576	44726634	829	18,3	9,0	0,1	0,0	154	149	1	1	0.659,1.0	NA,1.0	-0.17
839	ENSG00000100290.4	BIK	chr22	+	43123983	43124183	43124015	43124183	43110749	43110803	839	1,0	2,0	1,0	0,0	181	149	1	1	0.292,NA	1.0,NA	-0.708
844	ENSG00000100227.20	POLDIP3	chr22	-	42601969	42602056	42601969	42602047	42602769	42603160	844	363,281	12,5	29,16	1,0	158	149	0.106873	0.355654	0.966,0.981	0.965,1.0	-0.009
845	ENSG00000100227.20	POLDIP3	chr22	-	42601969	42602107	42601969	42602047	42602769	42603160	845	18,19	12,5	5,1	1,0	209	149	0.00285718	0.0190139	0.517,0.73	0.781,1.0	-0.267
846	ENSG00000100227.20	POLDIP3	chr22	-	42601969	42602107	42601969	42602056	42602769	42603160	846	9,6	354,268	2,1	26,16	200	149	0.445427	1	0.019,0.016	0.054,0.044	-0.032
849	ENSG00000100207.21	TCF20	chr22	-	42168608	42168736	42168608	42168703	42169846	42169896	849	6,6	8,8	0,1	0,4	182	149	1	1	0.38,0.38	NA,0.17	0.21
864	ENSG00000184983.12	NDUFA6	chr22	-	42085526	42086314	42085526	42086308	42087059	42087175	864	193,246	2,0	6,5	0,0	155	149	1	1	0.989,1.0	1.0,1.0	-0.006
865	ENSG00000183172.10	SMDT1	chr22	+	42082246	42084282	42083118	42084282	42081924	42082065	865	4,5	96,70	10,5	2,3	298	149	3.48982e-10	1.41086e-08	0.02,0.034	0.714,0.455	-0.557
866	ENSG00000183172.10	SMDT1	chr22	+	42082296	42084284	42083118	42084284	42081924	42082065	866	4,5	96,70	8,5	2,3	298	149	1.56786e-09	5.67629e-08	0.02,0.034	0.667,0.455	-0.534
867	ENSG00000183172.10	SMDT1	chr22	+	42082296	42084284	42084069	42084284	42081924	42082065	867	7,19	1,0	13,14	0,0	298	149	1	1	0.778,1.0	1.0,1.0	-0.111
868	ENSG00000183172.10	SMDT1	chr22	+	42083118	42084284	42084069	42084284	42081924	42082065	868	103,89	1,0	15,17	0,0	298	149	1	1	0.981,1.0	1.0,1.0	-0.01
875	ENSG00000196419.14	XRCC6	chr22	+	41628117	41628230	41628120	41628230	41621989	41622086	875	658,862	0,0	29,38	1,0	152	149	1	1	1.0,1.0	0.966,1.0	0.017
879	ENSG00000196419.14	XRCC6	chr22	+	41650686	41650891	41650722	41650891	41646895	41647082	879	8,5	526,465	1,5	11,22	185	149	0.00138296	0.0104941	0.012,0.009	0.068,0.155	-0.101
880	ENSG00000196419.14	XRCC6	chr22	+	41656869	41657032	41656902	41657032	41653528	41653690	880	14,3	770,510	3,1	16,19	182	149	0.0986377	0.336051	0.015,0.005	0.133,0.041	-0.077
881	ENSG00000196419.14	XRCC6	chr22	+	41658251	41658352	41658254	41658352	41656902	41657032	881	761,670	3,1	11,17	0,0	152	149	1	1	0.996,0.998	1.0,1.0	-0.003
882	ENSG00000196419.14	XRCC6	chr22	+	41658251	41658352	41658260	41658352	41656902	41657032	882	773,689	1,4	11,19	0,0	158	149	1	1	0.999,0.994	1.0,1.0	-0.004
883	ENSG00000196419.14	XRCC6	chr22	+	41658254	41658352	41658260	41658352	41656902	41657032	883	15,20	1,4	0,2	0,0	155	149	1	1	0.935,0.828	NA,1.0	-0.119
885	ENSG00000100418.9	DESI1	chr22	-	41603258	41603381	41603258	41603336	41604043	41604153	885	457,432	3,5	78,56	0,0	194	149	0.970715	1	0.992,0.985	1.0,1.0	-0.012
887	ENSG00000100403.13	ZC3H7B	chr22	+	41339815	41340137	41339940	41340137	41339000	41339191	887	607,305	4,1	48,61	1,0	274	149	1	1	0.988,0.994	0.963,1.0	0.009
888	ENSG00000100403.13	ZC3H7B	chr22	+	41339815	41340137	41339986	41340137	41339000	41339191	888	706,381	3,0	59,70	0,0	298	149	1	1	0.992,1.0	1.0,1.0	-0.004
889	ENSG00000100403.13	ZC3H7B	chr22	+	41339940	41340137	41339986	41340137	41339000	41339191	889	141,99	3,0	18,13	0,0	195	149	0.717103	1	0.973,1.0	1.0,1.0	-0.014
890	ENSG00000100401.22	RANGAP1	chr22	-	41249728	41249844	41249728	41249817	41251006	41251109	890	8,14	491,390	6,3	36,44	176	149	0.00859363	0.0467383	0.014,0.029	0.124,0.055	-0.068
895	ENSG00000100401.22	RANGAP1	chr22	-	41256020	41256108	41256020	41256105	41256190	41256290	895	3,11	375,301	1,0	27,25	152	149	0.204286	0.584352	0.008,0.035	0.035,0.0	0.004
896	ENSG00000100401.22	RANGAP1	chr22	-	41256190	41256290	41256190	41256260	41256710	41256824	896	430,303	3,0	59,47	0,0	179	149	1	1	0.992,1.0	1.0,1.0	-0.004
900	ENSG00000100401.22	RANGAP1	chr22	-	41280932	41281212	41280932	41281082	41284900	41285153	900	28,4	8,7	57,54	2,1	279	149	4.01712e-06	6.68173e-05	0.651,0.234	0.938,0.966	-0.509
904	ENSG00000100401.22	RANGAP1	chr22	-	41280932	41281212	41280932	41281075	41285985	41286251	904	43,9	3,0	60,57	0,0	286	149	0.261773	0.706836	0.882,1.0	1.0,1.0	-0.059
905	ENSG00000100393.17	EP300	chr22	+	41160611	41160722	41160641	41160722	41158411	41158500	905	3,2	122,125	0,1	12,28	179	149	0.801597	1	0.02,0.013	0.0,0.029	0.002
911	ENSG00000100380.16	ST13	chr22	-	40844838	40844939	40844838	40844909	40848293	40848369	911	1,2	64,93	0,3	10,4	179	149	0.212471	0.602396	0.013,0.018	0.0,0.384	-0.176
914	ENSG00000100359.22	SGSM3	chr22	+	40400695	40400813	40400700	40400813	40370590	40370688	914	45,27	0,0	17,31	0,2	154	149	0.285053	0.754303	1.0,1.0	1.0,0.937	0.031
916	ENSG00000100359.22	SGSM3	chr22	+	40404246	40404455	40404249	40404455	40402138	40402205	916	44,33	0,3	21,28	0,1	152	149	0.92374	1	1.0,0.915	1.0,0.965	-0.025
917	ENSG00000100359.22	SGSM3	chr22	+	40405579	40405844	40405648	40405844	40405140	40405284	917	1,0	37,31	4,6	15,24	218	149	6.13005e-05	0.000711487	0.018,0.0	0.154,0.146	-0.141
920	ENSG00000100359.22	SGSM3	chr22	+	40406053	40406223	40406077	40406223	40405648	40405844	920	1,0	40,25	0,0	19,22	173	149	1	1	0.021,0.0	0.0,0.0	0.011
924	ENSG00000100359.22	SGSM3	chr22	+	40408932	40409372	40409339	40409372	40408793	40408842	924	93,60	0,3	35,51	0,0	298	149	0.682881	1	1.0,0.909	1.0,1.0	-0.045
925	ENSG00000100359.22	SGSM3	chr22	+	40409198	40409372	40409249	40409372	40408932	40409018	925	9,8	20,2	8,5	0,3	200	149	0.0627241	0.235462	0.251,0.749	1.0,0.554	-0.277
926	ENSG00000100359.22	SGSM3	chr22	+	40409198	40409372	40409339	40409372	40408932	40409018	926	39,19	4,0	17,28	0,0	290	149	0.0434576	0.175397	0.834,1.0	1.0,1.0	-0.083
927	ENSG00000100359.22	SGSM3	chr22	+	40409249	40409372	40409339	40409372	40408932	40409018	927	50,13	4,0	9,26	0,0	239	149	0.0666029	0.246965	0.886,1.0	1.0,1.0	-0.057
932	ENSG00000239900.15	ADSL	chr22	+	40359259	40359306	40359263	40359306	40358863	40358979	932	4,4	0,1	5,0	0,0	153	149	1	1	1.0,0.796	1.0,NA	-0.102
934	ENSG00000239900.15	ADSL	chr22	+	40359259	40359306	40359263	40359306	40358912	40359035	934	299,257	1,2	35,27	0,0	153	149	1	1	0.997,0.992	1.0,1.0	-0.006
935	ENSG00000239900.15	ADSL	chr22	+	40361087	40361342	40361272	40361342	40360401	40360492	935	10,5	258,265	26,19	36,47	298	149	0	0	0.019,0.009	0.265,0.168	-0.203
937	ENSG00000239900.15	ADSL	chr22	+	40364879	40365056	40364912	40365056	40364275	40364365	937	244,335	1,7	31,41	0,0	182	149	0.74051	1	0.995,0.975	1.0,1.0	-0.015
938	ENSG00000239900.15	ADSL	chr22	+	40364879	40365056	40364915	40365056	40364275	40364365	938	251,350	1,0	32,42	0,0	185	149	1	1	0.995,1.0	1.0,1.0	-0.002
939	ENSG00000239900.15	ADSL	chr22	+	40364912	40365056	40364915	40365056	40364275	40364365	939	8,22	1,0	1,1	0,0	152	149	1	1	0.887,1.0	1.0,1.0	-0.056
941	ENSG00000100354.23	TNRC6B	chr22	+	40270100	40270280	40270121	40270280	40264687	40267036	941	2,1	26,13	1,4	0,2	170	149	0.000218877	0.00216409	0.063,0.063	1.0,0.637	-0.756
943	ENSG00000128272.20	ATF4	chr22	+	39521257	39521671	39521371	39521671	39520575	39520751	943	75,60	1,3	19,23	0,0	263	149	0.213675	0.604436	0.977,0.919	1.0,1.0	-0.052
945	ENSG00000100335.16	MIEF1	chr22	+	39509337	39509571	39509421	39509571	39504202	39504534	945	10,11	8,9	2,2	0,0	233	149	1.38569e-05	0.000197719	0.444,0.439	1.0,1.0	-0.558
946	ENSG00000100335.16	MIEF1	chr22	+	39512231	39512494	39512317	39512494	39511848	39512026	946	158,96	40,25	16,7	3,4	235	149	0.898717	1	0.715,0.709	0.772,0.526	0.063
950	ENSG00000100242.17	SUN2	chr22	-	38739341	38739426	38739341	38739423	38739721	38739943	950	71,45	0,3	7,9	0,0	152	149	0.444064	1	1.0,0.936	1.0,1.0	-0.032
954	ENSG00000100242.17	SUN2	chr22	-	38750224	38750380	38750224	38750320	38750897	38751035	954	3,0	60,14	5,1	14,12	209	149	0.0160495	0.0777579	0.034,0.0	0.203,0.056	-0.113
955	ENSG00000100242.17	SUN2	chr22	-	38750224	38750383	38750224	38750320	38750897	38751035	955	3,0	60,14	5,1	14,12	212	149	0.0164249	0.0791548	0.034,0.0	0.201,0.055	-0.111
957	ENSG00000100242.17	SUN2	chr22	-	38750224	38750383	38750224	38750320	38751209	38751373	957	3,0	0,1	5,1	2,0	212	149	0.691974	1	1.0,0.0	0.637,1.0	-0.319
958	ENSG00000100242.17	SUN2	chr22	-	38750897	38751059	38750897	38751035	38751209	38751373	958	0,0	43,19	1,0	6,6	173	149	1	1	0.0,0.0	0.126,0.0	-0.063
959	ENSG00000100242.17	SUN2	chr22	-	38750897	38751080	38750897	38751035	38751209	38751373	959	0,0	43,19	2,0	6,6	194	149	0.841576	1	0.0,0.0	0.204,0.0	-0.102
964	ENSG00000100242.17	SUN2	chr22	-	38754641	38754706	38754641	38754690	38755762	38756002	964	13,2	0,2	1,3	0,0	165	149	0.469142	1	1.0,0.475	1.0,1.0	-0.262
965	ENSG00000100242.17	SUN2	chr22	-	38754641	38754706	38754641	38754687	38755762	38756012	965	13,2	1,0	1,3	0,0	168	149	1	1	0.92,1.0	1.0,1.0	-0.04
966	ENSG00000100226.17	GTPBP1	chr22	+	38715906	38716087	38715960	38716087	38708844	38708956	966	168,181	4,0	31,20	0,0	203	149	0.640614	1	0.969,1.0	1.0,1.0	-0.016
967	ENSG00000100226.17	GTPBP1	chr22	+	38716627	38717000	38716651	38717000	38715906	38716087	967	8,5	126,127	2,2	25,12	173	149	0.630558	1	0.052,0.033	0.064,0.126	-0.053
968	ENSG00000100226.17	GTPBP1	chr22	+	38716627	38717000	38716792	38717000	38715906	38716087	968	66,76	1,1	15,27	0,0	298	149	0.4191	0.98603	0.971,0.974	1.0,1.0	-0.028
971	ENSG00000100226.17	GTPBP1	chr22	+	38716651	38717000	38716792	38717000	38715906	38716087	971	184,198	1,1	40,39	0,0	290	149	1	1	0.99,0.99	1.0,1.0	-0.01
978	ENSG00000100201.23	DDX17	chr22	-	38487878	38492115	38487878	38488115	38493709	38493771	978	1339,1754	3,0	594,391	0,0	298	149	1	1	0.996,1.0	1.0,1.0	-0.002
980	ENSG00000213923.14	CSNK1E	chr22	-	38290690	38291938	38290690	38291735	38293254	38293319	980	617,754	1,1	137,122	0,0	298	149	1	1	0.997,0.997	1.0,1.0	-0.003
981	ENSG00000198792.14	TMEM184B	chr22	-	38219290	38221746	38219290	38221710	38224784	38224979	981	19,11	201,197	2,3	8,8	185	149	0.184228	0.540575	0.071,0.043	0.168,0.232	-0.143
983	ENSG00000198792.14	TMEM184B	chr22	-	38225423	38225584	38225423	38225542	38226778	38226870	983	30,15	0,3	0,3	0,0	191	149	1	1	1.0,0.796	NA,1.0	-0.102
984	ENSG00000198792.14	TMEM184B	chr22	-	38225423	38225593	38225423	38225542	38226778	38226870	984	403,376	0,3	20,25	0,0	200	149	1	1	1.0,0.989	1.0,1.0	-0.006
986	ENSG00000198792.14	TMEM184B	chr22	-	38231243	38231399	38231243	38231334	38245934	38246100	986	11,9	140,111	2,6	7,13	214	149	0.0125499	0.0632011	0.052,0.053	0.166,0.243	-0.152
987	ENSG00000198792.14	TMEM184B	chr22	-	38231243	38231399	38231243	38231334	38247769	38248019	987	9,7	1,0	2,6	0,0	214	149	1	1	0.862,1.0	1.0,1.0	-0.069
993	ENSG00000100139.15	MICALL1	chr22	+	37932552	37932679	37932558	37932679	37931798	37931933	993	169,82	3,0	23,21	3,0	155	149	0.452351	1	0.982,1.0	0.881,1.0	0.05
994	ENSG00000100139.15	MICALL1	chr22	+	37932779	37932888	37932797	37932888	37932552	37932679	994	2,4	132,90	1,1	9,16	167	149	0.335579	0.849543	0.013,0.038	0.09,0.053	-0.046
995	ENSG00000100139.15	MICALL1	chr22	+	37937079	37937194	37937084	37937194	37933038	37933112	995	288,297	0,4	32,36	0,0	154	149	1	1	1.0,0.986	1.0,1.0	-0.007
996	ENSG00000100083.21	GGA1	chr22	+	37614189	37614274	37614193	37614274	37608834	37608903	996	28,14	0,0	18,8	0,3	153	149	0.209312	0.595219	1.0,1.0	1.0,0.722	0.139
998	ENSG00000100083.21	GGA1	chr22	+	37624880	37625076	37624968	37625076	37623551	37623633	998	5,1	40,15	8,17	13,7	237	149	2.1468e-05	0.000285861	0.073,0.04	0.279,0.604	-0.385
999	ENSG00000100083.21	GGA1	chr22	+	37625766	37625949	37625796	37625949	37624968	37625076	999	5,1	98,37	2,1	22,17	179	149	0.589355	1	0.041,0.022	0.07,0.047	-0.027
1000	ENSG00000100083.21	GGA1	chr22	+	37630902	37631099	37630906	37631099	37629997	37630162	1000	12,4	21,3	1,1	2,0	153	149	0.206931	0.59073	0.358,0.565	0.327,1.0	-0.202
1001	ENSG00000100083.21	GGA1	chr22	+	37630902	37631099	37630906	37631099	37629997	37630170	1001	217,154	2,0	35,25	0,0	153	149	1	1	0.991,1.0	1.0,1.0	-0.004
1029	ENSG00000100353.19	EIF3D	chr22	-	36517300	36517493	36517300	36517431	36518762	36518910	1029	30,24	915,902	17,18	27,30	211	149	0	0	0.023,0.018	0.308,0.298	-0.282
1031	ENSG00000100348.11	TXN2	chr22	-	36467375	36467917	36467375	36467842	36476732	36476856	1031	288,270	0,1	13,16	0,0	224	149	1	1	1.0,0.994	1.0,1.0	-0.003
1033	ENSG00000100348.11	TXN2	chr22	-	36480574	36480837	36480574	36480748	36481563	36481632	1033	157,179	4,3	11,18	0,0	238	149	0.102068	0.344112	0.961,0.974	1.0,1.0	-0.032
1034	ENSG00000100348.11	TXN2	chr22	-	36480574	36481044	36480574	36480748	36481563	36481632	1034	79,94	4,3	24,19	0,0	298	149	0.00989492	0.0521589	0.908,0.94	1.0,1.0	-0.076
1035	ENSG00000100348.11	TXN2	chr22	-	36480574	36481048	36480574	36480748	36481563	36481632	1035	79,94	4,3	24,19	0,0	298	149	0.00989492	0.0521589	0.908,0.94	1.0,1.0	-0.076
1036	ENSG00000100348.11	TXN2	chr22	-	36480574	36481044	36480574	36480837	36481563	36481632	1036	22,32	90,109	24,14	0,8	298	149	8.73929e-06	0.000133699	0.109,0.128	1.0,0.467	-0.615
1037	ENSG00000100348.11	TXN2	chr22	-	36480574	36481048	36480574	36480837	36481563	36481632	1037	22,32	90,109	24,14	0,8	298	149	8.73929e-06	0.000133699	0.109,0.128	1.0,0.467	-0.615
1050	ENSG00000100150.21	DEPDC5	chr22	+	31758526	31758633	31758545	31758633	31754861	31754979	1050	3,3	32,24	0,2	27,30	168	149	0.05017	0.196389	0.077,0.1	0.0,0.056	0.06
1053	ENSG00000100150.21	DEPDC5	chr22	+	31836971	31837155	31837093	31837155	31822692	31822790	1053	18,19	1,0	14,18	0,0	271	149	1	1	0.908,1.0	1.0,1.0	-0.046
1054	ENSG00000100150.21	DEPDC5	chr22	+	31836971	31837155	31836998	31837155	31833914	31833980	1054	12,19	1,5	18,18	0,1	176	149	0.00258349	0.0174236	0.91,0.763	1.0,0.938	-0.132
1055	ENSG00000100150.21	DEPDC5	chr22	+	31836971	31837155	31837093	31837155	31833914	31833980	1055	27,33	3,2	32,29	0,0	271	149	0.00390023	0.0244672	0.832,0.901	1.0,1.0	-0.133
1056	ENSG00000100150.21	DEPDC5	chr22	+	31836998	31837155	31837093	31837155	31833914	31833980	1056	16,19	3,2	14,12	0,0	244	149	0.00199065	0.0141257	0.765,0.853	1.0,1.0	-0.191
1057	ENSG00000100150.21	DEPDC5	chr22	+	31873171	31873332	31873254	31873332	31870589	31870744	1057	0,4	10,6	1,2	2,1	232	149	0.415967	0.98072	0.0,0.3	0.243,0.562	-0.253
1059	ENSG00000100150.21	DEPDC5	chr22	+	31876086	31876265	31876156	31876265	31874272	31874405	1059	1,0	22,6	1,3	3,9	219	149	0.0104042	0.0543317	0.03,0.0	0.185,0.185	-0.17
1060	ENSG00000241878.13	PISD	chr22	-	31620552	31620698	31620552	31620599	31620995	31621142	1060	57,35	2,3	12,5	0,0	248	149	0.0231184	0.105409	0.945,0.875	1.0,1.0	-0.09
1061	ENSG00000241878.13	PISD	chr22	-	31620552	31620713	31620552	31620599	31620995	31621142	1061	168,117	2,3	26,15	0,0	263	149	0.303767	0.790143	0.979,0.957	1.0,1.0	-0.032
1064	ENSG00000241878.13	PISD	chr22	-	31621648	31621885	31621648	31621822	31623683	31623849	1064	70,18	2,0	7,5	0,0	212	149	0.368369	0.905921	0.961,1.0	1.0,1.0	-0.02
1067	ENSG00000184708.19	EIF4ENIF1	chr22	-	31447425	31447568	31447425	31447565	31448152	31448232	1067	38,26	31,45	4,0	3,4	152	149	0.259671	0.702856	0.546,0.362	0.567,0.0	0.171
1068	ENSG00000184708.19	EIF4ENIF1	chr22	-	31449347	31449531	31449347	31449408	31450288	31450360	1068	133,122	0,3	29,24	0,0	272	149	0.487499	1	1.0,0.957	1.0,1.0	-0.022
1073	ENSG00000185133.15	INPP5J	chr22	+	31126293	31126489	31126375	31126489	31125832	31126010	1073	1,0	8,22	2,0	0,3	231	149	0.1558	0.474674	0.075,0.0	1.0,0.0	-0.463
1076	ENSG00000183963.20	SMTN	chr22	+	31088453	31088606	31088512	31088606	31087964	31088113	1076	1,0	11,10	1,4	13,5	208	149	0.0106586	0.0554021	0.061,0.0	0.052,0.364	-0.177
1077	ENSG00000183963.20	SMTN	chr22	+	31090960	31091482	31090962	31091482	31090807	31090879	1077	135,157	0,2	37,18	0,0	151	149	1	1	1.0,0.987	1.0,1.0	-0.006
1078	ENSG00000183963.20	SMTN	chr22	+	31095533	31095609	31095542	31095609	31095302	31095455	1078	14,33	0,0	7,7	1,0	158	149	1	1	1.0,1.0	0.868,1.0	0.066
1079	ENSG00000183963.20	SMTN	chr22	+	31095851	31096897	31096732	31096897	31095533	31095609	1079	5,0	12,17	14,13	2,3	298	149	2.48758e-09	8.47875e-08	0.172,0.0	0.778,0.684	-0.645
1081	ENSG00000183963.20	SMTN	chr22	+	31099061	31099179	31099064	31099179	31098666	31098840	1081	33,16	2,0	11,12	0,0	152	149	0.293162	0.769743	0.942,1.0	1.0,1.0	-0.029
1082	ENSG00000183963.20	SMTN	chr22	+	31099061	31099896	31099744	31099896	31098666	31098840	1082	39,19	4,1	15,19	2,0	298	149	0.132426	0.418622	0.83,0.905	0.789,1.0	-0.027
1083	ENSG00000253352.10	TUG1	chr22	+	30972854	30973601	30972923	30973601	30972047	30972172	1083	54,83	1,0	13,10	0,0	218	149	1	1	0.974,1.0	1.0,1.0	-0.013
1085	ENSG00000184792.17	OSBP2	chr22	+	30889489	30889636	30889519	30889636	30889176	30889234	1085	4,13	0,0	8,0	2,0	179	149	1	1	1.0,1.0	0.769,NA	0.231
1106	ENSG00000100330.17	MTMR3	chr22	+	29978424	29978531	29978441	29978531	29970975	29971062	1106	1,2	28,14	1,0	3,2	166	149	0.748166	1	0.031,0.114	0.23,0.0	-0.042
1111	ENSG00000100296.15	THOC5	chr22	-	29528077	29528177	29528077	29528174	29528425	29528466	1111	79,74	0,0	15,6	2,0	152	149	0.516329	1	1.0,1.0	0.88,1.0	0.06
1113	ENSG00000100296.15	THOC5	chr22	-	29545060	29545114	29545060	29545111	29549051	29549158	1113	0,0	1,0	1,0	0,0	152	149	1	1	0.0,NA	1.0,NA	-1
1114	ENSG00000100280.18	AP1B1	chr22	-	29329711	29329867	29329711	29329720	29330377	29330532	1114	4,2	87,62	13,11	4,1	296	149	0	0	0.023,0.016	0.621,0.847	-0.715
1115	ENSG00000100280.18	AP1B1	chr22	-	29331448	29331533	29331448	29331521	29331786	29331916	1115	315,231	0,1	18,25	0,0	161	149	1	1	1.0,0.995	1.0,1.0	-0.002
1116	ENSG00000100280.18	AP1B1	chr22	-	29334264	29334410	29334264	29334350	29338989	29339133	1116	685,311	10,12	31,46	0,0	209	149	0.0190049	0.0898044	0.98,0.949	1.0,1.0	-0.036
1121	ENSG00000100280.18	AP1B1	chr22	-	29356425	29356616	29356425	29356535	29358725	29358971	1121	402,339	0,1	43,44	0,0	230	149	1	1	1.0,0.995	1.0,1.0	-0.002
1127	ENSG00000186998.17	EMID1	chr22	+	29226421	29226551	29226489	29226551	29225132	29225216	1127	0,2	2,0	3,1	0,0	217	149	0.0335027	0.141415	0.0,1.0	1.0,1.0	-0.5
1131	ENSG00000235954.10	TTC28-AS1	chr22	+	27997985	27998838	27998603	27998838	27997410	27997739	1131	9,9	2,0	4,7	0,0	298	149	0.667989	1	0.692,1.0	1.0,1.0	-0.154
1140	ENSG00000100109.18	TFIP11	chr22	-	26501899	26502094	26501899	26502052	26503665	26503793	1140	0,0	30,8	2,1	2,1	191	149	0.00142986	0.0107887	0.0,0.0	0.438,0.438	-0.438
1144	ENSG00000100109.18	TFIP11	chr22	-	26510616	26510702	26510616	26510667	26512098	26512171	1144	60,59	1,0	11,2	0,0	184	149	1	1	0.98,1.0	1.0,1.0	-0.01
1147	ENSG00000100109.18	TFIP11	chr22	-	26511118	26511317	26511118	26511195	26512098	26512171	1147	4,0	2,0	5,4	0,0	271	149	1	1	0.524,NA	1.0,1.0	-0.476
1148	ENSG00000100109.18	TFIP11	chr22	-	26510616	26510692	26510616	26510667	26512098	26512175	1148	3,2	1,0	2,0	0,0	174	149	1	1	0.72,1.0	1.0,NA	-0.14
1150	ENSG00000100109.18	TFIP11	chr22	-	26512098	26512175	26512098	26512171	26512393	26512473	1150	15,19	0,1	0,2	0,0	153	149	1	1	1.0,0.949	NA,1.0	-0.026
1163	ENSG00000233577.7	ENSG00000233577	chr22	-	25281256	25281496	25281256	25281385	25282030	25282291	1163	0,0	1,1	3,0	0,0	260	149	1	1	0.0,0.0	1.0,NA	-1
1164	ENSG00000184634.18	MED12	chrX	+	71119338	71119477	71119372	71119477	71118595	71118853	1164	4,6	81,37	3,0	17,23	183	149	0.320365	0.822616	0.039,0.117	0.126,0.0	0.015
1166	ENSG00000184634.18	MED12	chrX	+	71124158	71124388	71124278	71124388	71123593	71123720	1166	123,85	0,0	48,42	2,0	269	149	0.367157	0.903857	1.0,1.0	0.93,1.0	0.035
1168	ENSG00000184634.18	MED12	chrX	+	71127847	71128120	71127892	71128120	71127335	71127467	1168	4,2	72,73	13,3	8,1	194	149	2.4322e-11	1.2291e-09	0.041,0.021	0.555,0.697	-0.595
1169	ENSG00000184634.18	MED12	chrX	+	71127850	71128120	71127892	71128120	71127335	71127467	1169	4,2	72,73	15,2	8,1	191	149	7.42961e-13	4.72186e-11	0.042,0.021	0.594,0.609	-0.57
1170	ENSG00000184634.18	MED12	chrX	+	71130011	71130214	71130034	71130214	71129679	71129855	1170	2,3	54,60	1,12	23,19	172	149	0.00379761	0.0238956	0.031,0.042	0.036,0.354	-0.158
1171	ENSG00000184634.18	MED12	chrX	+	71132072	71132538	71132376	71132538	71131549	71131621	1171	49,58	0,0	35,42	1,0	298	149	1	1	1.0,1.0	0.946,1.0	0.027
1172	ENSG00000184634.18	MED12	chrX	+	71137186	71137383	71137233	71137383	71136878	71137029	1172	118,85	0,1	50,27	1,1	196	149	0.341872	0.860086	1.0,0.985	0.974,0.954	0.028
1174	ENSG00000184634.18	MED12	chrX	+	71137557	71137635	71137560	71137635	71137186	71137383	1174	88,51	2,1	13,14	1,1	152	149	0.456723	1	0.977,0.98	0.927,0.932	0.049
1175	ENSG00000184634.18	MED12	chrX	+	71137557	71137635	71137560	71137635	71137186	71137392	1175	75,52	1,0	18,10	0,0	152	149	1	1	0.987,1.0	1.0,1.0	-0.006
1178	ENSG00000184634.18	MED12	chrX	+	71141229	71141370	71141232	71141370	71140634	71140857	1178	6,3	0,5	4,6	0,1	152	149	0.0195149	0.0918265	1.0,0.37	1.0,0.855	-0.242
1191	ENSG00000100014.21	SPECC1L	chr22	+	24321287	24322918	24321404	24322918	24313312	24313466	1191	212,233	0,2	71,48	0,0	266	149	1	1	1.0,0.985	1.0,1.0	-0.008
1193	ENSG00000099991.19	CABIN1	chr22	+	24177503	24177817	24177590	24177817	24171712	24171995	1193	130,86	0,2	22,16	0,0	236	149	1	1	1.0,0.964	1.0,1.0	-0.018
1194	ENSG00000099991.19	CABIN1	chr22	+	24177503	24177817	24177590	24177817	24176110	24176275	1194	233,164	9,2	31,25	0,4	236	149	0.558657	1	0.942,0.981	1.0,0.798	0.062
1196	ENSG00000133460.21	SLC2A11	chr22	+	23875084	23875241	23875116	23875241	23868480	23868641	1196	1,0	1,8	1,0	7,0	181	149	1	1	0.452,0.0	0.105,NA	0.121
1197	ENSG00000133460.21	SLC2A11	chr22	+	23875084	23875241	23875120	23875241	23868480	23868641	1197	1,0	0,6	3,0	0,1	185	149	0.149245	0.460096	1.0,0.0	1.0,0.0	0
1198	ENSG00000133460.21	SLC2A11	chr22	+	23875116	23875241	23875120	23875241	23868480	23868641	1198	1,8	0,6	9,0	0,1	153	149	0.0615251	0.232097	1.0,0.565	1.0,0.0	0.282
1205	ENSG00000099958.16	DERL3	chr22	-	23834502	23836962	23834502	23834932	23837063	23837154	1205	16,8	3,2	2,4	0,0	298	149	0.000670702	0.00564569	0.727,0.667	1.0,1.0	-0.303
1227	ENSG00000250479.10	CHCHD10	chr22	-	23766127	23766275	23766127	23766251	23767373	23767593	1227	243,88	2,0	6,8	0,0	173	149	1	1	0.991,1.0	1.0,1.0	-0.004
1228	ENSG00000250479.10	CHCHD10	chr22	-	23766127	23766296	23766127	23766251	23767373	23767593	1228	50,35	2,0	6,6	0,0	194	149	0.390076	0.940719	0.95,1.0	1.0,1.0	-0.025
1229	ENSG00000250479.10	CHCHD10	chr22	-	23766127	23766296	23766127	23766275	23767373	23767593	1229	4,3	197,56	3,1	3,3	170	149	0.00964927	0.0511232	0.017,0.045	0.467,0.226	-0.316
1230	ENSG00000250479.10	CHCHD10	chr22	-	23767373	23767656	23767373	23767593	23767833	23767972	1230	7,0	186,74	0,2	6,7	212	149	0.760513	1	0.026,0.0	0.0,0.167	-0.071
1237	ENSG00000228315.13	GUSBP11	chr22	-	23640307	23640447	23640307	23640423	23652478	23652576	1237	1,0	2,2	3,1	0,0	173	149	9.21806e-08	2.28551e-06	0.301,0.0	1.0,1.0	-0.85
1244	ENSG00000228315.13	GUSBP11	chr22	-	23653163	23653470	23653163	23653352	23659864	23660000	1244	8,6	3,0	14,10	3,5	267	149	0.277386	0.738714	0.598,1.0	0.723,0.527	0.174
1249	ENSG00000228315.13	GUSBP11	chr22	-	23700725	23700845	23700725	23700831	23705428	23705541	1249	8,0	0,0	7,2	0,2	163	149	1	1	1.0,NA	1.0,0.478	0.261
1253	ENSG00000228315.13	GUSBP11	chr22	-	23715008	23715194	23715008	23715190	23717030	23717325	1253	49,30	1,0	20,37	1,1	153	149	0.481536	1	0.979,1.0	0.951,0.973	0.028
1255	ENSG00000228315.13	GUSBP11	chr22	-	23715008	23715194	23715008	23715190	23717107	23717417	1255	18,4	1,1	19,7	0,0	153	149	0.656167	1	0.946,0.796	1.0,1.0	-0.129
1257	ENSG00000100030.16	MAPK1	chr22	-	21760321	21764262	21760321	21764240	21769194	21769320	1257	1,4	88,72	0,0	9,4	171	149	0.437554	1	0.01,0.046	0.0,0.0	0.028
1261	ENSG00000099949.23	LZTR1	chr22	+	20994103	20994269	20994106	20994269	20993923	20994019	1261	81,64	2,0	34,39	1,0	152	149	1	1	0.975,1.0	0.971,1.0	0.002
1262	ENSG00000099949.23	LZTR1	chr22	+	20994869	20995026	20994914	20995026	20994557	20994727	1262	96,64	6,0	24,31	0,2	194	149	0.469005	1	0.925,1.0	1.0,0.923	0.001
1280	ENSG00000099901.19	RANBP1	chr22	+	20126951	20127355	20126954	20127355	20126302	20126368	1280	637,650	344,411	17,24	11,17	152	149	0.635694	1	0.645,0.608	0.602,0.581	0.035
1282	ENSG00000128191.18	DGCR8	chr22	+	20108889	20109003	20108892	20109003	20107270	20107398	1282	78,103	1,0	34,45	0,4	152	149	0.254498	0.691684	0.987,1.0	1.0,0.917	0.035
1284	ENSG00000183597.17	TANGO2	chr22	+	20053359	20053551	20053436	20053551	20052464	20052584	1284	2,4	4,9	4,1	2,0	226	149	0.030249	0.130057	0.248,0.227	0.569,1.0	-0.547
1286	ENSG00000093010.16	COMT	chr22	+	19961696	19962815	19962232	19962815	19961198	19961289	1286	11,0	6,5	9,14	0,0	298	149	9.60376e-09	2.89986e-07	0.478,0.0	1.0,1.0	-0.761
1287	ENSG00000093010.16	COMT	chr22	+	19961696	19962815	19962526	19962815	19961198	19961289	1287	12,10	79,57	2,4	7,3	298	149	0.162303	0.489871	0.071,0.081	0.125,0.4	-0.186
1288	ENSG00000093010.16	COMT	chr22	+	19962232	19962815	19962526	19962815	19961198	19961289	1288	18,15	79,57	2,4	7,3	298	149	0.393685	0.946274	0.102,0.116	0.125,0.4	-0.154
1290	ENSG00000093010.16	COMT	chr22	+	19964109	19964299	19964167	19964299	19963565	19963759	1290	8,9	136,125	1,0	3,6	207	149	0.0748599	0.270149	0.041,0.049	0.194,0.0	-0.052
1291	ENSG00000093010.16	COMT	chr22	+	19964155	19964299	19964167	19964299	19963565	19963759	1291	1,2	136,125	1,0	3,6	161	149	1	1	0.007,0.015	0.236,0.0	-0.107
1295	ENSG00000100075.11	SLC25A1	chr22	-	19176577	19176693	19176577	19176633	19176845	19176950	1295	290,212	1,1	11,20	0,0	209	149	1	1	0.995,0.993	1.0,1.0	-0.006
1296	ENSG00000100075.11	SLC25A1	chr22	-	19176577	19176693	19176577	19176642	19176845	19176950	1296	285,212	0,1	11,20	0,0	200	149	1	1	1.0,0.994	1.0,1.0	-0.003
1299	ENSG00000100056.13	ESS2	chr22	-	19138214	19138335	19138214	19138317	19139158	19139292	1299	1,0	91,39	0,3	4,5	167	149	0.105875	0.353499	0.01,0.0	0.0,0.349	-0.169
1300	ENSG00000100056.13	ESS2	chr22	-	19139854	19140027	19139854	19140024	19142537	19142633	1300	4,3	32,22	0,1	0,0	152	149	1	1	0.109,0.118	NA,1.0	-0.887
1301	ENSG00000070413.22	DGCR2	chr22	-	19041057	19041300	19041057	19041294	19041806	19041959	1301	3,1	133,129	2,0	17,8	155	149	0.525573	1	0.021,0.007	0.102,0.0	-0.037
1302	ENSG00000070413.22	DGCR2	chr22	-	19041057	19041303	19041057	19041294	19041806	19041959	1302	14,4	133,129	2,1	17,8	158	149	0.444975	1	0.09,0.028	0.1,0.105	-0.044
1304	ENSG00000070413.22	DGCR2	chr22	-	19056985	19057186	19056985	19057162	19063201	19063278	1304	3,1	175,157	4,0	19,11	173	149	0.0605139	0.228996	0.015,0.005	0.153,0.0	-0.067
1305	ENSG00000070413.22	DGCR2	chr22	-	19064847	19065067	19064847	19065058	19068099	19068222	1305	67,62	17,5	9,11	1,12	158	149	0.155606	0.474489	0.788,0.921	0.895,0.464	0.175
1320	ENSG00000099954.20	CECR2	chr22	+	17548147	17549564	17548150	17549564	17542156	17543003	1320	51,40	0,4	16,3	3,0	152	149	0.605962	1	1.0,0.907	0.839,1.0	0.034
1340	ENSG00000160305.20	DIP2A	chr21	+	46504357	46504489	46504360	46504489	46498581	46498833	1340	4,0	58,32	0,2	11,22	152	149	0.637801	1	0.063,0.0	0.0,0.082	-0.01
1342	ENSG00000160298.19	C21orf58	chr21	-	46301129	46302154	46301129	46301713	46302484	46302576	1342	110,55	2,0	64,81	0,0	298	149	0.53494	1	0.965,1.0	1.0,1.0	-0.018
1343	ENSG00000160298.19	C21orf58	chr21	-	46314715	46315049	46314715	46314880	46315473	46315547	1343	49,14	38,27	41,37	41,20	298	149	0.268601	0.721124	0.392,0.206	0.333,0.481	-0.108
1344	ENSG00000160298.19	C21orf58	chr21	-	46317207	46317268	46317207	46317265	46318011	46318220	1344	35,8	1,1	16,23	0,3	152	149	0.666883	1	0.972,0.887	1.0,0.883	-0.012
1345	ENSG00000160298.19	C21orf58	chr21	-	46317207	46317348	46317207	46317265	46318011	46318220	1345	50,17	1,1	45,34	0,3	232	149	0.479508	1	0.97,0.916	1.0,0.879	0.004
1346	ENSG00000160298.19	C21orf58	chr21	-	46317207	46317348	46317207	46317268	46318011	46318220	1346	43,17	28,8	43,33	14,22	229	149	0.5328	1	0.5,0.58	0.666,0.494	-0.04
1352	ENSG00000142173.18	COL6A2	chr21	+	46118549	46118676	46118613	46118676	46117873	46117936	1352	0,0	5,1	3,0	0,2	213	149	0.0459432	0.183517	0.0,0.0	1.0,0.0	-0.5
1355	ENSG00000142173.18	COL6A2	chr21	+	46120383	46120577	46120514	46120577	46119787	46119850	1355	1,0	11,0	0,1	0,0	280	149	1	1	0.046,NA	NA,1.0	-0.954
1357	ENSG00000142173.18	COL6A2	chr21	+	46120397	46120577	46120514	46120577	46119787	46119850	1357	0,0	11,0	0,1	0,0	266	149	1	1	0.0,NA	NA,1.0	-1
1364	ENSG00000182871.17	COL18A1	chr21	+	45505528	45505966	45505834	45505966	45505357	45505431	1364	5,2	11,7	4,6	3,0	298	149	0.00687912	0.0389113	0.185,0.125	0.4,1.0	-0.545
1365	ENSG00000182871.17	COL18A1	chr21	+	45505528	45505966	45505837	45505966	45505357	45505431	1365	10,2	55,17	4,6	3,7	298	149	0.00332621	0.0214959	0.083,0.056	0.4,0.3	-0.28
1366	ENSG00000182871.17	COL18A1	chr21	+	45505834	45505966	45505837	45505966	45505357	45505431	1366	16,7	55,17	3,0	3,7	152	149	0.396568	0.951633	0.222,0.288	0.495,0.0	0.008
1369	ENSG00000183255.13	PTTG1IP	chr21	-	44849599	44851642	44849599	44851627	44855209	44855256	1369	2,3	185,131	0,0	8,13	164	149	0.658666	1	0.01,0.02	0.0,0.0	0.015
1373	ENSG00000184900.17	SUMO3	chr21	-	44809046	44809118	44809046	44809100	44813975	44814104	1373	362,357	4,6	15,10	0,0	167	149	0.594887	1	0.988,0.982	1.0,1.0	-0.015
1374	ENSG00000184900.17	SUMO3	chr21	-	44809046	44809160	44809046	44809100	44813975	44814104	1374	22,25	4,6	8,1	0,0	209	149	0.000199858	0.00199776	0.797,0.748	1.0,1.0	-0.228
1375	ENSG00000184900.17	SUMO3	chr21	-	44809046	44809160	44809046	44809118	44813975	44814104	1375	1,6	341,338	0,0	7,9	191	149	1	1	0.002,0.014	0.0,0.0	0.008
1386	ENSG00000160218.14	TRAPPC10	chr21	+	44087698	44087928	44087821	44087928	44086801	44086960	1386	174,250	0,2	74,60	0,0	272	149	1	1	1.0,0.986	1.0,1.0	-0.007
1388	ENSG00000160218.14	TRAPPC10	chr21	+	44094062	44094233	44094073	44094233	44091922	44092049	1388	54,49	0,2	12,23	0,0	160	149	0.736176	1	1.0,0.958	1.0,1.0	-0.021
1390	ENSG00000160214.14	RRP1	chr21	+	43797421	43797551	43797425	43797551	43795188	43795250	1390	214,159	4,0	39,48	7,4	153	149	1.63981e-05	0.000228163	0.981,1.0	0.844,0.921	0.108
1398	ENSG00000160200.19	CBS	chr21	-	43065202	43065308	43065202	43065272	43065386	43065521	1398	0,1	79,47	1,2	30,12	185	149	0.757739	1	0.0,0.017	0.026,0.118	-0.064
1402	ENSG00000160200.19	CBS	chr21	-	43073265	43073341	43073265	43073303	43075769	43075829	1402	1,1	1,0	1,0	1,0	187	149	1	1	0.443,1.0	0.443,NA	0.279
1403	ENSG00000160200.19	CBS	chr21	-	43073265	43073341	43073265	43073303	43076224	43076264	1403	0,3	0,1	2,0	0,0	187	149	1	1	NA,0.705	1.0,NA	-0.295
1404	ENSG00000160199.16	PKNOX1	chr21	+	43016907	43017007	43016910	43017007	43013067	43013238	1404	36,44	8,1	15,10	0,1	152	149	0.0101542	0.0532256	0.815,0.977	1.0,0.907	-0.058
1405	ENSG00000160199.16	PKNOX1	chr21	+	43018132	43018230	43018141	43018230	43016907	43017007	1405	48,54	1,0	7,7	0,0	158	149	1	1	0.978,1.0	1.0,1.0	-0.011
1413	ENSG00000141956.15	PRDM15	chr21	-	41836467	41836649	41836467	41836589	41837933	41838063	1413	54,43	4,0	25,10	0,0	209	149	0.188872	0.551424	0.906,1.0	1.0,1.0	-0.047
1422	ENSG00000157557.14	ETS2	chr21	+	38819478	38819766	38819502	38819766	38818424	38818646	1422	1,0	89,86	0,0	4,4	173	149	1	1	0.01,0.0	0.0,0.0	0.005
1427	ENSG00000157540.23	DYRK1A	chr21	+	37478180	37478300	37478207	37478300	37472683	37472880	1427	35,25	163,156	2,8	19,15	176	149	0.605271	1	0.154,0.119	0.082,0.311	-0.06
1428	ENSG00000157540.23	DYRK1A	chr21	+	37496090	37496258	37496117	37496258	37493016	37493163	1428	5,2	83,151	1,5	19,11	176	149	0.0208222	0.0965423	0.049,0.011	0.043,0.278	-0.131
1430	ENSG00000159267.18	HLCS	chr21	-	36756541	36756980	36756541	36756755	36759726	36759841	1430	8,3	95,133	9,9	15,7	298	149	4.34768e-09	1.41875e-07	0.04,0.011	0.231,0.391	-0.285
1431	ENSG00000159259.9	CHAF1B	chr21	+	36409373	36409558	36409512	36409558	36402757	36402851	1431	5,4	0,0	8,20	0,1	288	149	1	1	1.0,1.0	1.0,0.912	0.044
1441	ENSG00000236830.9	CBR3-AS1	chr21	-	36146255	36146531	36146255	36146355	36156216	36156322	1441	4,1	0,1	4,1	0,0	298	149	1	1	1.0,0.333	1.0,1.0	-0.334
1445	ENSG00000185917.15	SETD4	chr21	-	36058815	36058973	36058815	36058924	36060346	36060526	1445	14,6	22,12	1,13	13,11	198	149	0.568942	1	0.324,0.273	0.055,0.471	0.035
1448	ENSG00000241837.8	ATP5PO	chr21	-	33903455	33903656	33903455	33903639	33903934	33904021	1448	7,10	1081,810	2,0	17,18	166	149	0.540649	1	0.006,0.011	0.096,0.0	-0.04
1452	ENSG00000241837.8	ATP5PO	chr21	-	33909081	33909211	33909081	33909199	33912288	33912399	1452	965,752	0,1	24,17	0,0	161	149	1	1	1.0,0.999	1.0,1.0	0
1456	ENSG00000159147.19	DONSON	chr21	-	33579349	33579562	33579349	33579436	33581301	33581500	1456	146,153	0,1	55,71	0,0	275	149	1	1	1.0,0.988	1.0,1.0	-0.006
1460	ENSG00000159147.19	DONSON	chr21	-	33584589	33584768	33584589	33584729	33585977	33586181	1460	155,190	1,0	31,28	0,0	188	149	1	1	0.992,1.0	1.0,1.0	-0.004
1461	ENSG00000159147.19	DONSON	chr21	-	33585977	33586181	33585977	33586060	33587521	33587602	1461	179,220	0,2	26,24	0,0	270	149	1	1	1.0,0.984	1.0,1.0	-0.008
1462	ENSG00000159140.23	SON	chr21	+	33576364	33577481	33576417	33577481	33575777	33575893	1462	150,195	109,143	28,32	38,27	202	149	0.10469	0.350749	0.504,0.501	0.352,0.466	0.093
1463	ENSG00000142188.18	TMEM50B	chr21	-	33448781	33450863	33448781	33448879	33455726	33455784	1463	16,30	1,0	6,10	0,0	298	149	1	1	0.889,1.0	1.0,1.0	-0.055
1465	ENSG00000142166.16	IFNAR1	chr21	+	33343267	33343422	33343272	33343422	33340998	33341174	1465	51,60	1,0	8,12	0,0	154	149	1	1	0.98,1.0	1.0,1.0	-0.01
1466	ENSG00000142166.16	IFNAR1	chr21	+	33343510	33343676	33343534	33343676	33343267	33343422	1466	0,4	113,128	7,0	17,16	173	149	0.00154718	0.0114886	0.0,0.026	0.262,0.0	-0.118
1469	ENSG00000142166.16	IFNAR1	chr21	+	33352736	33352908	33352757	33352908	33349388	33349543	1469	0,1	39,82	1,1	15,18	170	149	0.245257	0.673485	0.0,0.011	0.055,0.046	-0.045
1491	ENSG00000156261.14	CCT8	chr21	-	29062127	29062243	29062127	29062234	29062327	29062415	1491	686,685	0,6	32,34	0,0	158	149	1	1	1.0,0.991	1.0,1.0	-0.004
1493	ENSG00000156261.14	CCT8	chr21	-	29066715	29067071	29066715	29066777	29067555	29067705	1493	440,529	0,0	50,32	1,0	298	149	1	1	1.0,1.0	0.962,1.0	0.019
1496	ENSG00000142192.23	APP	chr21	-	25975069	25975228	25975069	25975219	25975953	25976028	1496	292,225	2,2	36,40	0,0	158	149	1	1	0.993,0.991	1.0,1.0	-0.008
1497	ENSG00000142192.23	APP	chr21	-	25982343	25982477	25982343	25982465	26000014	26000182	1497	183,191	1,0	20,21	0,0	161	149	1	1	0.994,1.0	1.0,1.0	-0.003
1498	ENSG00000154727.12	GABPA	chr21	+	25741560	25741675	25741572	25741675	25736673	25736790	1498	6,11	2,0	0,1	0,0	161	149	1	1	0.735,1.0	NA,1.0	-0.133
1499	ENSG00000154727.12	GABPA	chr21	+	25741560	25741675	25741572	25741675	25739879	25740032	1499	9,11	9,20	0,1	4,1	161	149	0.00322139	0.0209491	0.481,0.337	0.0,0.481	0.169
1501	ENSG00000154723.14	ATP5PF	chr21	-	25724479	25724677	25724479	25724662	25725225	25725350	1501	374,639	0,1	18,16	0,0	164	149	1	1	1.0,0.998	1.0,1.0	-0.001
1517	ENSG00000157538.15	VPS26C	chr21	-	37232376	37232645	37232376	37232451	37233361	37233442	1517	1,7	34,42	9,3	8,7	298	149	0.000564269	0.00488832	0.014,0.077	0.36,0.176	-0.223
1518	ENSG00000157538.15	VPS26C	chr21	-	37232376	37232451	37232376	37232445	37238459	37238609	1518	12,16	0,7	2,3	0,0	155	149	0.00104346	0.0082312	1.0,0.687	1.0,1.0	-0.156
1520	ENSG00000155313.17	USP25	chr21	+	15877735	15877991	15877795	15877991	15874402	15874526	1520	0,1	29,22	4,1	0,3	209	149	0.000460581	0.00409618	0.0,0.031	1.0,0.192	-0.581
1563	ENSG00000203880.14	PCMTD2	chr20	+	64267886	64268010	64267967	64268010	64265257	64265429	1563	87,87	4,1	23,22	6,0	230	149	0.0622842	0.234294	0.934,0.983	0.713,1.0	0.102
1565	ENSG00000196132.15	MYT1	chr20	+	64218829	64219035	64218910	64219035	64217066	64217281	1565	0,3	0,1	0,1	0,1	230	149	1	1	NA,0.66	NA,0.393	0.267
1566	ENSG00000171700.15	RGS19	chr20	-	64074466	64074583	64074466	64074541	64076524	64076646	1566	0,4	57,27	0,1	0,0	191	149	1	1	0.0,0.104	NA,1.0	-0.948
1567	ENSG00000101150.19	TPD52L2	chr20	+	63875800	63875875	63875815	63875875	63873667	63873816	1567	1,5	79,62	2,10	5,2	164	149	3.08272e-05	0.000390431	0.011,0.068	0.267,0.82	-0.504
1568	ENSG00000101150.19	TPD52L2	chr20	+	63882718	63882820	63882749	63882820	63873667	63873816	1568	173,147	1,5	35,29	1,1	180	149	0.56164	1	0.993,0.961	0.967,0.96	0.013
1569	ENSG00000101150.19	TPD52L2	chr20	+	63882718	63882820	63882749	63882820	63875815	63875875	1569	170,116	2,0	36,19	0,0	180	149	1	1	0.986,1.0	1.0,1.0	-0.007
1570	ENSG00000101150.19	TPD52L2	chr20	+	63887560	63887605	63887563	63887605	63882718	63882820	1570	0,0	0,2	1,1	0,0	152	149	1	1	NA,0.0	1.0,1.0	-1
1572	ENSG00000101150.19	TPD52L2	chr20	+	63889849	63891538	63889855	63891538	63889189	63889238	1572	358,248	8,3	27,38	1,1	155	149	0.593294	1	0.977,0.988	0.963,0.973	0.014
1573	ENSG00000203896.11	LIME1	chr20	+	63737972	63738060	63738007	63738060	63737820	63737902	1573	5,8	6,8	4,15	7,2	184	149	0.277177	0.738293	0.403,0.447	0.316,0.859	-0.162
1578	ENSG00000197114.13	ZGPAT	chr20	+	63734644	63734824	63734704	63734824	63733586	63733712	1578	6,8	2,6	6,7	3,1	209	149	0.318735	0.819733	0.681,0.487	0.588,0.833	-0.126
1579	ENSG00000197114.13	ZGPAT	chr20	+	63734644	63734824	63734704	63734824	63733586	63733739	1579	7,9	26,26	6,7	11,9	209	149	0.132925	0.419925	0.161,0.198	0.28,0.357	-0.139
1580	ENSG00000197114.13	ZGPAT	chr20	+	63734644	63734824	63734704	63734824	63733586	63733775	1580	6,8	0,1	6,7	0,0	209	149	1	1	1.0,0.851	1.0,1.0	-0.075
1584	ENSG00000101246.21	ARFRP1	chr20	-	63701829	63701900	63701829	63701898	63702135	63702217	1584	26,26	6,1	7,5	0,0	151	149	0.00171284	0.0124768	0.81,0.962	1.0,1.0	-0.114
1585	ENSG00000101246.21	ARFRP1	chr20	-	63706998	63707097	63706998	63707092	63707866	63707900	1585	12,22	8,4	20,3	1,10	154	149	0.810003	1	0.592,0.842	0.951,0.225	0.129
1586	ENSG00000026036.23	RTEL1-TNFRSF6B	chr20	+	63692016	63693003	63692804	63693003	63691741	63691837	1586	3,0	53,33	11,15	22,45	298	149	2.08322e-07	4.80495e-06	0.028,0.0	0.2,0.143	-0.157
1587	ENSG00000258366.13	RTEL1	chr20	+	63661743	63661943	63661849	63661943	63661297	63661496	1587	12,7	85,57	30,21	102,96	255	149	0.0191731	0.0905401	0.076,0.067	0.147,0.113	-0.058
1588	ENSG00000258366.13	RTEL1	chr20	+	63662395	63662627	63662473	63662627	63661849	63661943	1588	5,0	0,0	14,21	2,0	227	149	1	1	1.0,NA	0.821,1.0	0.09
1589	ENSG00000258366.13	RTEL1	chr20	+	63662395	63662627	63662545	63662627	63661849	63661943	1589	8,3	62,39	17,26	48,58	298	149	8.12435e-05	0.000910252	0.061,0.037	0.15,0.183	-0.117
1590	ENSG00000258366.13	RTEL1	chr20	+	63662473	63662627	63662545	63662627	63661849	63661943	1590	3,3	62,39	6,5	48,58	221	149	0.218091	0.613353	0.032,0.049	0.078,0.055	-0.026
1591	ENSG00000258366.13	RTEL1	chr20	+	63679761	63679946	63679848	63679946	63678267	63678346	1591	1,0	32,10	9,6	18,32	236	149	4.3041e-05	0.000522887	0.019,0.0	0.24,0.106	-0.163
1592	ENSG00000258366.13	RTEL1	chr20	+	63688120	63688179	63688138	63688179	63687936	63688050	1592	0,0	18,17	3,2	30,57	167	149	0.0778595	0.278983	0.0,0.0	0.082,0.03	-0.056
1593	ENSG00000258366.13	RTEL1	chr20	+	63689749	63689865	63689764	63689865	63689054	63689132	1593	2,0	0,0	5,2	1,0	164	149	1	1	1.0,NA	0.82,1.0	0.09
1594	ENSG00000258366.13	RTEL1	chr20	+	63689749	63689865	63689764	63689865	63689501	63689648	1594	49,10	1,2	21,31	0,2	164	149	0.768583	1	0.978,0.82	1.0,0.934	-0.068
1595	ENSG00000258366.13	RTEL1	chr20	+	63690086	63690210	63690143	63690210	63689749	63689865	1595	50,25	1,0	28,52	0,0	206	149	1	1	0.973,1.0	1.0,1.0	-0.014
1597	ENSG00000258366.13	RTEL1	chr20	+	63694318	63694488	63694371	63694488	63693142	63693283	1597	3,0	63,36	2,4	26,34	202	149	0.0664594	0.246496	0.034,0.0	0.054,0.08	-0.05
1600	ENSG00000197457.11	STMN3	chr20	-	63643755	63643955	63643755	63643931	63644213	63644309	1600	2,0	124,94	2,0	6,8	173	149	0.762682	1	0.014,0.0	0.223,0.0	-0.104
1602	ENSG00000125534.12	PPDPF	chr20	+	63521245	63521363	63521283	63521363	63520764	63520894	1602	12,3	350,243	3,3	21,21	187	149	0.0315485	0.134611	0.027,0.01	0.102,0.102	-0.083
1603	ENSG00000125534.12	PPDPF	chr20	+	63521245	63521363	63521293	63521363	63520764	63520894	1603	72,34	3,0	4,14	0,0	197	149	0.543751	1	0.948,1.0	1.0,1.0	-0.026
1604	ENSG00000125534.12	PPDPF	chr20	+	63521283	63521363	63521293	63521363	63520764	63520894	1604	410,274	3,0	22,32	0,0	159	149	1	1	0.992,1.0	1.0,1.0	-0.004
1605	ENSG00000125534.12	PPDPF	chr20	+	63521667	63522164	63521760	63522164	63521511	63521589	1605	783,306	6,0	44,51	0,0	242	149	1	1	0.988,1.0	1.0,1.0	-0.006
1610	ENSG00000101210.16	EEF1A2	chr20	-	63495855	63496087	63495855	63496035	63497619	63497834	1610	2,5	203,263	1,2	7,1	201	149	0.0921918	0.318481	0.007,0.014	0.096,0.597	-0.336
1613	ENSG00000101210.16	EEF1A2	chr20	-	63497619	63498663	63497619	63497834	63499057	63499082	1613	8,11	67,82	2,7	2,1	298	149	0.000476981	0.00422005	0.056,0.063	0.333,0.778	-0.496
1614	ENSG00000101210.16	EEF1A2	chr20	-	63497619	63497928	63497619	63497834	63499057	63499083	1614	8,11	67,82	2,7	2,1	243	149	0.000266314	0.00257195	0.068,0.076	0.38,0.811	-0.524
1615	ENSG00000149658.19	YTHDF1	chr20	-	63202286	63203840	63202286	63203807	63213863	63213943	1615	7,2	165,173	12,8	25,25	182	149	2.67614e-10	1.10649e-08	0.034,0.009	0.282,0.208	-0.224
1618	ENSG00000101187.17	SLCO4A1	chr20	+	62664858	62665088	62664933	62665088	62661063	62661175	1618	2,0	70,57	5,2	15,13	224	149	0.000375801	0.00344204	0.019,0.0	0.181,0.093	-0.128
1619	ENSG00000101187.17	SLCO4A1	chr20	+	62664903	62665088	62664933	62665088	62661063	62661175	1619	0,0	70,57	3,1	15,13	179	149	0.0597655	0.226754	0.0,0.0	0.143,0.06	-0.101
1621	ENSG00000101187.17	SLCO4A1	chr20	+	62667744	62667910	62667798	62667910	62666379	62666575	1621	52,19	1,0	6,15	0,0	203	149	1	1	0.974,1.0	1.0,1.0	-0.013
1622	ENSG00000101187.17	SLCO4A1	chr20	+	62668011	62668184	62668157	62668184	62667869	62667910	1622	101,95	0,0	25,11	0,1	295	149	1	1	1.0,1.0	1.0,0.847	0.077
1627	ENSG00000149679.13	CABLES2	chr20	-	62392919	62393041	62392919	62393023	62393439	62393605	1627	0,1	46,36	0,0	2,1	167	149	1	1	0.0,0.024	0.0,0.0	0.012
1628	ENSG00000101181.19	MTG2	chr20	+	62200682	62203568	62203083	62203568	62199118	62199257	1628	98,73	0,3	39,33	0,0	298	149	0.542469	1	1.0,0.924	1.0,1.0	-0.038
1629	ENSG00000101182.16	PSMA7	chr20	-	62137363	62137465	62137363	62137426	62138170	62138290	1629	3,1	665,397	3,3	3,14	188	149	0.00015626	0.00161751	0.004,0.002	0.442,0.145	-0.29
1630	ENSG00000101182.16	PSMA7	chr20	-	62139074	62139197	62139074	62139185	62139780	62139905	1630	653,401	5,0	14,18	0,1	161	149	1	1	0.992,1.0	1.0,0.943	0.024
1640	ENSG00000101158.16	NELFCD	chr20	+	58986092	58986208	58986095	58986208	58981246	58981369	1640	46,52	4,1	9,23	4,3	152	149	0.0263695	0.116829	0.919,0.981	0.688,0.883	0.164
1641	ENSG00000101158.16	NELFCD	chr20	+	58987707	58987817	58987719	58987817	58986753	58986863	1641	217,221	0,2	28,47	0,0	161	149	1	1	1.0,0.99	1.0,1.0	-0.005
1646	ENSG00000101158.16	NELFCD	chr20	+	58993623	58994239	58994109	58994239	58993448	58993544	1646	131,136	3,0	15,29	0,0	298	149	0.470759	1	0.956,1.0	1.0,1.0	-0.022
1650	ENSG00000124222.24	STX16	chr20	+	58671153	58671297	58671163	58671297	58670511	58670603	1650	118,120	0,0	93,62	0,1	159	149	1	1	1.0,1.0	1.0,0.983	0.008
1667	ENSG00000000419.15	DPM1	chr20	-	50940864	50940955	50940864	50940933	50941104	50941209	1667	2,3	5,7	2,1	0,0	171	149	7.14253e-07	1.45388e-05	0.258,0.272	1.0,1.0	-0.735
1668	ENSG00000000419.15	DPM1	chr20	-	50940864	50940955	50940864	50940933	50941128	50941209	1668	2,4	9,15	2,1	0,0	171	149	1.18743e-06	2.26795e-05	0.162,0.189	1.0,1.0	-0.825
1669	ENSG00000000419.15	DPM1	chr20	-	50940864	50940955	50940864	50940933	50942030	50942126	1669	3,3	39,115	2,1	9,13	171	149	0.617472	1	0.063,0.022	0.162,0.063	-0.07
1670	ENSG00000000419.15	DPM1	chr20	-	50942030	50942142	50942030	50942126	50945839	50945923	1670	1,7	1,3	0,1	0,0	165	149	1	1	0.475,0.678	NA,1.0	-0.423
1682	ENSG00000177410.14	ZFAS1	chr20	+	49280863	49280964	49280902	49280964	49280484	49280570	1682	4,2	57,97	5,9	3,5	188	149	2.58072e-11	1.29517e-09	0.053,0.016	0.569,0.588	-0.544
1683	ENSG00000124228.16	DDX27	chr20	+	49224774	49224991	49224944	49224991	49223267	49223433	1683	0,0	11,22	0,3	8,9	298	149	0.383388	0.930593	0.0,0.0	0.0,0.143	-0.071
1684	ENSG00000124228.16	DDX27	chr20	+	49226414	49226535	49226429	49226535	49225112	49225199	1684	0,0	57,88	0,1	17,22	164	149	1	1	0.0,0.0	0.0,0.04	-0.02
1685	ENSG00000124228.16	DDX27	chr20	+	49230159	49230349	49230198	49230349	49228714	49228888	1685	1,0	92,69	7,2	7,12	188	149	1.69703e-06	3.11458e-05	0.009,0.0	0.442,0.117	-0.275
1686	ENSG00000124228.16	DDX27	chr20	+	49233534	49233709	49233567	49233709	49233305	49233405	1686	2,4	74,58	3,1	5,13	182	149	0.192035	0.558193	0.022,0.053	0.329,0.059	-0.157
1692	ENSG00000124228.16	DDX27	chr20	+	49236159	49236231	49236168	49236231	49234934	49235035	1692	7,3	0,1	3,0	0,1	158	149	1	1	1.0,0.739	1.0,0.0	0.369
1693	ENSG00000124228.16	DDX27	chr20	+	49236086	49236231	49236149	49236231	49234934	49235088	1693	9,10	108,98	2,5	6,6	212	149	0.0135593	0.0672605	0.055,0.067	0.19,0.369	-0.218
1696	ENSG00000124207.18	CSE1L	chr20	+	49072285	49072453	49072327	49072453	49070204	49070297	1696	385,514	3,0	61,75	0,0	191	149	1	1	0.99,1.0	1.0,1.0	-0.005
1706	ENSG00000101040.21	ZMYND8	chr20	-	47238895	47239138	47238895	47239132	47246007	47246517	1706	34,52	1,0	4,2	0,0	155	149	1	1	0.97,1.0	1.0,1.0	-0.015
1707	ENSG00000101040.21	ZMYND8	chr20	-	47298728	47298947	47298728	47298872	47310055	47310204	1707	41,56	14,13	55,27	10,4	224	149	0.151211	0.464555	0.661,0.741	0.785,0.818	-0.1
1708	ENSG00000101040.21	ZMYND8	chr20	-	47298728	47298947	47298728	47298872	47347855	47347926	1708	16,16	0,4	23,10	2,0	224	149	0.245864	0.674388	1.0,0.727	0.884,1.0	-0.079
1723	ENSG00000062598.19	ELMO2	chr20	-	46394404	46394528	46394404	46394503	46398696	46398771	1723	2,0	6,15	2,3	1,1	174	149	0.000168886	0.00173462	0.222,0.0	0.631,0.72	-0.565
1724	ENSG00000062598.19	ELMO2	chr20	-	46394404	46394532	46394404	46394503	46398696	46398771	1724	20,11	6,15	3,7	1,1	178	149	0.0244614	0.10988	0.736,0.38	0.715,0.854	-0.226
1727	ENSG00000062598.19	ELMO2	chr20	-	46394404	46394532	46394404	46394503	46406547	46406615	1727	10,2	3,0	2,4	0,1	178	149	0.111097	0.364505	0.736,1.0	1.0,0.77	-0.017
1728	ENSG00000080189.16	SLC35C2	chr20	-	46352050	46352226	46352050	46352185	46354881	46354965	1728	183,189	6,4	31,25	0,1	190	149	0.0826359	0.292247	0.96,0.974	1.0,0.951	-0.009
1735	ENSG00000080189.16	SLC35C2	chr20	-	46355072	46355241	46355072	46355178	46355801	46355874	1735	123,109	13,4	18,17	0,1	212	149	1	1	0.869,0.95	1.0,0.923	-0.052
1736	ENSG00000080189.16	SLC35C2	chr20	-	46355072	46355279	46355072	46355178	46355801	46355874	1736	80,62	13,4	18,16	0,1	250	149	0.00151	0.0112798	0.786,0.902	1.0,0.905	-0.108
1737	ENSG00000080189.16	SLC35C2	chr20	-	46355072	46355339	46355072	46355178	46355801	46355874	1737	88,70	13,4	24,23	0,1	298	149	0.0007726	0.00637439	0.772,0.897	1.0,0.92	-0.125
1738	ENSG00000080189.16	SLC35C2	chr20	-	46355072	46355354	46355072	46355178	46355801	46355874	1738	88,70	13,4	24,23	0,1	298	149	0.0007726	0.00637439	0.772,0.897	1.0,0.92	-0.125
1739	ENSG00000080189.16	SLC35C2	chr20	-	46355072	46355279	46355072	46355241	46355801	46355874	1739	5,1	48,48	4,3	4,4	187	149	0.000327215	0.0030606	0.077,0.016	0.443,0.374	-0.362
1740	ENSG00000080189.16	SLC35C2	chr20	-	46355072	46355339	46355072	46355241	46355801	46355874	1740	15,9	48,48	12,12	4,4	247	149	1.32261e-08	3.88874e-07	0.159,0.102	0.644,0.644	-0.514
1741	ENSG00000080189.16	SLC35C2	chr20	-	46355072	46355354	46355072	46355241	46355801	46355874	1741	16,9	48,48	12,14	4,4	262	149	3.94489e-09	1.30486e-07	0.159,0.096	0.63,0.666	-0.52
1745	ENSG00000080189.16	SLC35C2	chr20	-	46355072	46355241	46355072	46355178	46356573	46356637	1745	76,65	1,0	14,13	0,0	212	149	1	1	0.982,1.0	1.0,1.0	-0.009
1746	ENSG00000080189.16	SLC35C2	chr20	-	46357622	46357773	46357622	46357702	46358386	46358763	1746	135,119	5,6	19,12	0,0	220	149	0.00578598	0.0337106	0.948,0.931	1.0,1.0	-0.06
1748	ENSG00000080189.16	SLC35C2	chr20	-	46358386	46358763	46358386	46358558	46363085	46363948	1748	66,44	1,0	12,14	0,0	298	149	1	1	0.971,1.0	1.0,1.0	-0.014
1749	ENSG00000080189.16	SLC35C2	chr20	-	46358386	46358766	46358386	46358763	46363899	46363980	1749	7,10	1,0	1,0	0,0	152	149	1	1	0.873,1.0	1.0,NA	-0.064
1751	ENSG00000080189.16	SLC35C2	chr20	-	46358386	46358973	46358386	46358763	46364370	46364404	1751	25,20	41,20	24,18	6,0	298	149	1.7046e-05	0.000235153	0.234,0.333	0.667,1.0	-0.55
1758	ENSG00000080189.16	SLC35C2	chr20	-	46358386	46358958	46358386	46358763	46364370	46364415	1758	27,20	41,20	24,18	6,0	298	149	2.07296e-05	0.000277552	0.248,0.333	0.667,1.0	-0.543
1760	ENSG00000080189.16	SLC35C2	chr20	-	46358386	46358766	46358386	46358763	46364370	46364441	1760	7,10	41,20	1,0	6,0	152	149	1	1	0.143,0.329	0.14,NA	0.096
1763	ENSG00000198026.9	ZNF335	chr20	-	45948652	45949080	45948652	45949077	45949169	45949251	1763	27,26	5,0	7,8	0,0	152	149	0.0255663	0.113894	0.841,1.0	1.0,1.0	-0.08
1764	ENSG00000198026.9	ZNF335	chr20	-	45949332	45949425	45949332	45949398	45949484	45949568	1764	0,0	45,32	0,2	19,14	176	149	0.670889	1	0.0,0.0	0.0,0.108	-0.054
1766	ENSG00000198026.9	ZNF335	chr20	-	45967493	45967634	45967493	45967631	45967733	45968027	1766	17,40	14,2	11,12	0,3	152	149	0.130088	0.412842	0.543,0.951	1.0,0.797	-0.152
1768	ENSG00000064601.22	CTSA	chr20	+	45892272	45892484	45892397	45892484	45891915	45892027	1768	124,90	1,0	15,18	0,0	274	149	1	1	0.985,1.0	1.0,1.0	-0.008
1770	ENSG00000064601.22	CTSA	chr20	+	45893987	45894072	45894006	45894072	45892724	45892880	1770	29,24	3,0	3,7	0,0	168	149	0.572619	1	0.896,1.0	1.0,1.0	-0.052
1772	ENSG00000064601.22	CTSA	chr20	+	45894822	45894901	45894832	45894901	45894649	45894741	1772	192,173	0,0	30,37	2,0	159	149	0.413912	0.977961	1.0,1.0	0.934,1.0	0.033
1773	ENSG00000064601.22	CTSA	chr20	+	45896455	45897040	45896964	45897040	45894993	45895133	1773	16,8	133,150	13,11	7,10	298	149	1.38913e-11	7.32516e-10	0.057,0.026	0.481,0.355	-0.377
1774	ENSG00000064601.22	CTSA	chr20	+	45896455	45897040	45897003	45897040	45894993	45895133	1774	55,43	0,0	13,18	0,1	298	149	1	1	1.0,1.0	1.0,0.9	0.05
1775	ENSG00000064601.22	CTSA	chr20	+	45896964	45897040	45897003	45897040	45894993	45895133	1775	175,185	0,0	12,20	0,1	188	149	1	1	1.0,1.0	1.0,0.941	0.03
1778	ENSG00000064601.22	CTSA	chr20	+	45897716	45897806	45897725	45897806	45896964	45897040	1778	187,183	0,0	15,13	0,1	158	149	1	1	1.0,1.0	1.0,0.925	0.037
1781	ENSG00000101473.18	ACOT8	chr20	-	45843526	45843772	45843526	45843721	45844262	45844420	1781	4,2	33,18	1,2	3,2	200	149	0.408103	0.969877	0.083,0.076	0.199,0.427	-0.233
1786	ENSG00000101457.14	DNTTIP1	chr20	+	45803329	45803378	45803332	45803378	45801998	45802057	1786	11,2	172,150	0,0	6,3	152	149	0.0278175	0.122018	0.059,0.013	0.0,0.0	0.036
1789	ENSG00000177189.15	RPS6KA3	chrX	-	20172745	20172871	20172745	20172868	20175163	20175288	1789	86,144	17,39	17,20	2,0	152	149	0.00046778	0.00414873	0.832,0.784	0.893,1.0	-0.138
1790	ENSG00000177189.15	RPS6KA3	chrX	-	20176433	20176498	20176433	20176492	20176995	20177084	1790	80,101	2,2	23,1	1,0	155	149	0.584896	1	0.975,0.98	0.957,1.0	-0.001
1791	ENSG00000177189.15	RPS6KA3	chrX	-	20176433	20176516	20176433	20176492	20176995	20177084	1791	4,6	2,2	0,0	1,0	173	149	1	1	0.633,0.721	0.0,NA	0.677
1792	ENSG00000177189.15	RPS6KA3	chrX	-	20176433	20176516	20176433	20176498	20176995	20177084	1792	1,0	77,95	0,0	23,1	167	149	1	1	0.011,0.0	0.0,0.0	0.005
1793	ENSG00000177189.15	RPS6KA3	chrX	-	20240568	20240669	20240568	20240605	20241592	20241686	1793	4,1	4,0	1,0	0,0	213	149	1	1	0.412,1.0	1.0,NA	-0.294
1797	ENSG00000124155.20	PIGT	chr20	+	45418771	45418979	45418851	45418979	45416516	45416654	1797	11,12	1,0	18,10	0,0	229	149	1	1	0.877,1.0	1.0,1.0	-0.061
1798	ENSG00000124155.20	PIGT	chr20	+	45418771	45418979	45418851	45418979	45416516	45416694	1798	13,12	319,352	15,10	17,11	229	149	1.11022e-16	1.2149e-14	0.026,0.022	0.365,0.372	-0.344
1800	ENSG00000124155.20	PIGT	chr20	+	45419142	45419395	45419294	45419395	45416516	45416694	1800	18,0	3,3	10,8	1,2	298	149	0.0607964	0.229826	0.75,0.0	0.833,0.667	-0.375
1801	ENSG00000124155.20	PIGT	chr20	+	45419277	45419395	45419294	45419395	45416516	45416694	1801	6,0	3,3	2,0	1,2	166	149	0.306817	0.796128	0.642,0.0	0.642,0.0	0
1805	ENSG00000124155.20	PIGT	chr20	+	45419503	45419590	45419507	45419590	45418851	45418979	1805	3,4	0,0	0,1	0,2	153	149	1	1	1.0,1.0	NA,0.327	0.673
1806	ENSG00000124155.20	PIGT	chr20	+	45419472	45419590	45419503	45419590	45419294	45419395	1806	12,5	172,89	4,0	13,7	180	149	0.607913	1	0.055,0.044	0.203,0.0	-0.052
1807	ENSG00000124155.20	PIGT	chr20	+	45419472	45419590	45419507	45419590	45419294	45419395	1807	15,7	2,0	4,1	3,0	184	149	0.207963	0.592655	0.859,1.0	0.519,1.0	0.17
1808	ENSG00000124155.20	PIGT	chr20	+	45419503	45419590	45419507	45419590	45419294	45419395	1808	175,91	2,0	13,8	3,0	153	149	0.201882	0.579869	0.988,1.0	0.808,1.0	0.09
1810	ENSG00000124155.20	PIGT	chr20	+	45420311	45420429	45420331	45420429	45420135	45420223	1810	11,13	298,323	5,1	36,32	169	149	0.383104	0.930059	0.032,0.034	0.109,0.027	-0.035
1811	ENSG00000124155.20	PIGT	chr20	+	45420507	45420693	45420527	45420693	45420331	45420429	1811	13,10	258,367	4,6	33,19	169	149	0.00238655	0.0163531	0.043,0.023	0.097,0.218	-0.124
1812	ENSG00000124155.20	PIGT	chr20	+	45420507	45420693	45420575	45420693	45420331	45420429	1812	58,49	0,0	6,14	0,2	217	149	0.691455	1	1.0,1.0	1.0,0.828	0.086
1813	ENSG00000124155.20	PIGT	chr20	+	45420527	45420693	45420575	45420693	45420331	45420429	1813	303,406	0,0	35,27	0,2	197	149	0.563492	1	1.0,1.0	1.0,0.911	0.044
1815	ENSG00000124155.20	PIGT	chr20	+	45429444	45429670	45429480	45429670	45427421	45427545	1815	1,0	0,4	0,1	2,0	185	149	1	1	1.0,0.0	0.0,1.0	0
1822	ENSG00000204070.11	SYS1	chr20	+	45365546	45365686	45365618	45365686	45363528	45363693	1822	7,2	52,46	0,0	7,9	221	149	0.0101251	0.053122	0.083,0.028	0.0,0.0	0.056
1825	ENSG00000025772.9	TOMM34	chr20	-	44951832	44952002	44951832	44951993	44955067	44955220	1825	52,70	1,1	5,5	0,0	158	149	1	1	0.98,0.985	1.0,1.0	-0.018
1826	ENSG00000025772.9	TOMM34	chr20	-	44951832	44952038	44951832	44951993	44955067	44955220	1826	7,21	1,1	1,0	0,0	194	149	1	1	0.843,0.942	1.0,NA	-0.108
1827	ENSG00000025772.9	TOMM34	chr20	-	44951832	44952038	44951832	44952002	44955067	44955220	1827	1,1	46,50	0,0	4,5	185	149	1	1	0.017,0.016	0.0,0.0	0.017
1829	ENSG00000101104.14	PABPC1L	chr20	+	44930459	44930726	44930517	44930726	44924160	44924256	1829	10,4	27,25	9,15	58,77	207	149	0.410774	0.973789	0.21,0.103	0.1,0.123	0.045
1834	ENSG00000101104.14	PABPC1L	chr20	+	44938044	44938191	44938060	44938191	44936636	44936730	1834	0,0	17,17	1,0	19,31	165	149	1	1	0.0,0.0	0.045,0.0	-0.022
1835	ENSG00000101104.14	PABPC1L	chr20	+	44938044	44938191	44938101	44938191	44936636	44936730	1835	4,2	0,2	5,2	0,1	206	149	0.380064	0.925781	1.0,0.42	1.0,0.591	-0.086
1836	ENSG00000101104.14	PABPC1L	chr20	+	44938060	44938191	44938101	44938191	44936636	44936730	1836	21,19	0,2	23,33	0,1	190	149	0.768551	1	1.0,0.882	1.0,0.963	-0.04
1837	ENSG00000101057.17	MYBL2	chr20	+	43699756	43700044	43699906	43700044	43673805	43673899	1837	452,302	1,4	54,58	0,0	298	149	0.802486	1	0.996,0.974	1.0,1.0	-0.015
1838	ENSG00000101057.17	MYBL2	chr20	+	43692120	43692319	43692135	43692319	43686851	43687072	1838	4,0	0,1	6,1	0,0	164	149	1	1	1.0,0.0	1.0,1.0	-0.5
1839	ENSG00000101057.17	MYBL2	chr20	+	43692120	43692319	43692156	43692319	43686851	43687072	1839	13,10	246,239	11,3	38,32	185	149	0.00168879	0.0123387	0.041,0.033	0.189,0.07	-0.092
1840	ENSG00000101057.17	MYBL2	chr20	+	43692120	43692319	43692201	43692319	43686851	43687072	1840	124,132	1,0	33,19	0,0	230	149	1	1	0.988,1.0	1.0,1.0	-0.006
1841	ENSG00000101057.17	MYBL2	chr20	+	43692135	43692319	43692156	43692319	43686851	43687072	1841	9,11	246,239	5,2	38,32	170	149	0.243679	0.670202	0.031,0.039	0.103,0.052	-0.042
1842	ENSG00000101057.17	MYBL2	chr20	+	43692135	43692319	43692201	43692319	43686851	43687072	1842	120,133	1,0	27,18	0,0	215	149	1	1	0.988,1.0	1.0,1.0	-0.006
1843	ENSG00000101057.17	MYBL2	chr20	+	43692156	43692319	43692201	43692319	43686851	43687072	1843	357,361	1,0	60,48	0,0	194	149	1	1	0.996,1.0	1.0,1.0	-0.002
1844	ENSG00000101057.17	MYBL2	chr20	+	43709938	43710062	43709962	43710062	43705218	43705358	1844	2,3	832,1089	3,8	46,44	173	149	4.00807e-06	6.6743e-05	0.002,0.002	0.053,0.135	-0.092
1845	ENSG00000101057.17	MYBL2	chr20	+	43711442	43711601	43711487	43711601	43709962	43710062	1845	6,7	322,303	4,2	24,23	194	149	0.0223375	0.102329	0.014,0.017	0.113,0.063	-0.072
1848	ENSG00000101057.17	MYBL2	chr20	+	43715133	43715283	43715220	43715283	43713001	43713106	1848	438,324	1,0	60,43	0,0	236	149	1	1	0.996,1.0	1.0,1.0	-0.002
1849	ENSG00000101052.14	IFT52	chr20	+	43620856	43620925	43620871	43620925	43613849	43613976	1849	6,2	1,0	1,2	0,0	164	149	1	1	0.845,1.0	1.0,1.0	-0.078
1856	ENSG00000132793.13	LPIN3	chr20	+	41349088	41349172	41349091	41349172	41348618	41348887	1856	8,0	5,8	3,2	1,3	152	149	0.212314	0.602226	0.611,0.0	0.746,0.395	-0.265
1866	ENSG00000101407.14	TTI1	chr20	-	37996748	37997007	37996748	37996953	37999187	37999328	1866	9,6	22,6	16,5	9,2	203	149	0.0160145	0.0776397	0.231,0.423	0.566,0.647	-0.28
1876	ENSG00000130703.18	OSBPL2	chr20	+	62273164	62273406	62273308	62273406	62272124	62272259	1876	15,4	56,75	15,15	7,8	293	149	3.89283e-11	1.90315e-09	0.12,0.026	0.521,0.488	-0.431
1877	ENSG00000149636.17	DSN1	chr20	-	36762460	36762530	36762460	36762512	36766768	36766841	1877	8,11	1,2	2,1	0,1	167	149	0.140967	0.440818	0.877,0.831	1.0,0.472	0.118
1878	ENSG00000149636.17	DSN1	chr20	-	36762460	36762548	36762460	36762512	36766768	36766841	1878	62,37	1,2	11,9	0,1	185	149	0.504462	1	0.98,0.937	1.0,0.879	0.019
1879	ENSG00000149636.17	DSN1	chr20	-	36762460	36762548	36762460	36762530	36766768	36766841	1879	54,27	0,1	9,8	0,0	167	149	1	1	1.0,0.96	1.0,1.0	-0.02
1886	ENSG00000088367.24	EPB41L1	chr20	+	36194211	36194360	36194214	36194360	36190621	36190797	1886	10,6	4,3	5,1	0,0	152	149	9.45435e-05	0.0010432	0.71,0.662	1.0,1.0	-0.314
1887	ENSG00000088367.24	EPB41L1	chr20	+	36214356	36214440	36214359	36214440	36212271	36212376	1887	6,7	6,17	0,2	0,0	152	149	1	1	0.495,0.288	NA,1.0	-0.609
1892	ENSG00000131051.25	RBM39	chr20	-	35709223	35709309	35709223	35709274	35710282	35710566	1892	2,2	0,4	4,2	0,0	184	149	0.00929601	0.0497222	1.0,0.288	1.0,1.0	-0.356
1893	ENSG00000131051.25	RBM39	chr20	-	35709223	35709274	35709223	35709256	35713018	35713090	1893	289,263	183,161	29,37	12,24	167	149	0.532191	1	0.585,0.593	0.683,0.579	-0.042
1894	ENSG00000131051.25	RBM39	chr20	-	35709223	35709309	35709223	35709256	35713018	35713096	1894	96,90	183,161	12,20	12,24	202	149	0.0959322	0.329112	0.279,0.292	0.425,0.381	-0.118
1895	ENSG00000131051.25	RBM39	chr20	-	35709223	35709309	35709223	35709274	35713018	35713096	1895	2,0	195,173	4,2	21,19	184	149	0.00248595	0.0169147	0.008,0.0	0.134,0.079	-0.103
1896	ENSG00000131051.25	RBM39	chr20	-	35709223	35709274	35709223	35709256	35714184	35714389	1896	94,90	3,6	8,18	0,0	167	149	0.0162356	0.0784504	0.965,0.93	1.0,1.0	-0.052
1899	ENSG00000131051.25	RBM39	chr20	-	35713018	35713111	35713018	35713096	35714184	35714389	1899	13,8	172,230	0,0	16,17	164	149	0.00658203	0.03767	0.064,0.031	0.0,0.0	0.048
1900	ENSG00000131051.25	RBM39	chr20	-	35729311	35729365	35729311	35729362	35729461	35729527	1900	250,291	15,14	49,35	1,0	152	149	0.00324362	0.0210749	0.942,0.953	0.98,1.0	-0.042
1901	ENSG00000131051.25	RBM39	chr20	-	35729461	35729551	35729461	35729527	35731940	35732135	1901	4,2	206,265	2,1	48,34	173	149	0.426114	0.996252	0.016,0.006	0.035,0.025	-0.019
1903	ENSG00000131051.25	RBM39	chr20	-	35734185	35735081	35734185	35734257	35738967	35739017	1903	20,34	2,8	28,33	0,0	298	149	5.99783e-06	9.51935e-05	0.833,0.68	1.0,1.0	-0.244
1904	ENSG00000244005.14	NFS1	chr20	-	35692248	35692370	35692248	35692296	35696376	35696460	1904	1,0	0,0	3,6	0,1	223	149	1	1	1.0,NA	1.0,0.8	0.1
1905	ENSG00000244005.14	NFS1	chr20	-	35697683	35697827	35697683	35697800	35698480	35698590	1905	3,0	59,37	0,0	6,9	176	149	0.44298	1	0.041,0.0	0.0,0.0	0.021
1910	ENSG00000088298.14	EDEM2	chr20	-	35142372	35142497	35142372	35142478	35146824	35146935	1910	0,1	3,0	1,0	2,0	168	149	1	1	0.0,1.0	0.307,NA	0.193
1914	ENSG00000131069.21	ACSS2	chr20	+	34927068	34927959	34927086	34927959	34926876	34926951	1914	0,0	27,30	1,0	1,3	167	149	1	1	0.0,0.0	0.472,0.0	-0.236
1916	ENSG00000131067.18	GGT7	chr20	-	34852154	34852272	34852154	34852212	34852388	34852538	1916	69,60	2,0	48,45	0,0	209	149	0.660782	1	0.961,1.0	1.0,1.0	-0.02
1917	ENSG00000131067.18	GGT7	chr20	-	34859442	34859682	34859442	34859639	34859968	34860130	1917	7,3	46,29	7,4	7,9	192	149	0.00418522	0.0259199	0.106,0.074	0.437,0.256	-0.257
1918	ENSG00000131067.18	GGT7	chr20	-	34859968	34860077	34859968	34860042	34860253	34860321	1918	7,5	56,31	6,9	3,5	184	149	4.50391e-07	9.58331e-06	0.092,0.116	0.618,0.593	-0.501
1922	ENSG00000198646.15	NCOA6	chr20	-	34727258	34727407	34727258	34727404	34732558	34732595	1922	72,82	1,6	7,7	1,0	152	149	0.106499	0.35485	0.986,0.931	0.873,1.0	0.022
1923	ENSG00000198646.15	NCOA6	chr20	-	34754721	34754835	34754721	34754832	34757219	34758104	1923	18,8	13,10	5,0	2,4	152	149	0.334689	0.847739	0.576,0.44	0.71,0.0	0.153
1924	ENSG00000198646.15	NCOA6	chr20	-	34754721	34754868	34754721	34754832	34757219	34758104	1924	75,58	13,10	26,8	2,4	185	149	0.81336	1	0.823,0.824	0.913,0.617	0.058
1925	ENSG00000198646.15	NCOA6	chr20	-	34754721	34754868	34754721	34754835	34757219	34758104	1925	73,56	16,6	25,8	4,0	182	149	0.232545	0.644961	0.789,0.884	0.837,1.0	-0.082
1926	ENSG00000198646.15	NCOA6	chr20	-	34758804	34758948	34758804	34758933	34768463	34768586	1926	5,5	70,79	2,1	14,8	164	149	0.49623	1	0.061,0.054	0.115,0.102	-0.051
1929	ENSG00000100982.13	PCIF1	chr20	+	45940432	45940612	45940474	45940612	45939214	45939339	1929	3,0	56,37	5,1	3,1	191	149	1.63049e-05	0.000227083	0.04,0.0	0.565,0.438	-0.481
1930	ENSG00000100982.13	PCIF1	chr20	+	45943069	45943244	45943096	45943244	45941052	45941207	1930	4,1	38,10	0,2	1,10	176	149	0.361954	0.895289	0.082,0.078	0.0,0.145	0.008
1937	ENSG00000100982.13	PCIF1	chr20	+	45946001	45946115	45946028	45946115	45945710	45945883	1937	0,1	40,31	1,2	2,5	176	149	0.0106732	0.055438	0.0,0.027	0.297,0.253	-0.262
1938	ENSG00000125970.13	RALY	chr20	+	34077027	34077245	34077168	34077245	34076701	34076815	1938	102,82	2,3	9,10	1,2	290	149	0.280342	0.744999	0.963,0.934	0.822,0.72	0.178
1940	ENSG00000125970.13	RALY	chr20	+	34079909	34084884	34084660	34084884	34078504	34078553	1940	259,195	0,3	31,15	0,0	298	149	0.91963	1	1.0,0.97	1.0,1.0	-0.015
1941	ENSG00000125967.18	NECAB3	chr20	-	33658721	33658858	33658721	33658834	33659496	33659732	1941	1,0	26,11	1,0	6,3	173	149	1	1	0.032,0.0	0.126,0.0	-0.047
1948	ENSG00000125967.18	NECAB3	chr20	-	33659884	33660034	33659884	33660003	33660258	33660395	1948	0,0	20,5	1,2	1,0	180	149	5.86521e-05	0.000685091	0.0,0.0	0.453,1.0	-0.727
1949	ENSG00000125967.18	NECAB3	chr20	-	33659884	33660058	33659884	33660003	33660258	33660395	1949	2,0	20,5	1,4	1,0	204	149	5.95531e-06	9.46219e-05	0.068,0.0	0.422,1.0	-0.677
1958	ENSG00000101367.10	MAPRE1	chr20	+	32836633	32836841	32836693	32836841	32833716	32833862	1958	759,715	0,1	37,29	0,0	209	149	1	1	1.0,0.998	1.0,1.0	-0.001
1959	ENSG00000088305.20	DNMT3B	chr20	+	32795314	32795534	32795408	32795534	32792625	32792770	1959	3,5	50,45	3,11	1,0	243	149	3.89679e-11	1.90315e-09	0.035,0.064	0.648,1.0	-0.775
1961	ENSG00000088305.20	DNMT3B	chr20	+	32796940	32797299	32797186	32797299	32796789	32796869	1961	0,3	30,21	11,4	4,1	298	149	5.60932e-10	2.20048e-08	0.0,0.067	0.579,0.667	-0.59
1968	ENSG00000088325.17	TPX2	chr20	+	31742540	31742647	31742562	31742647	31739266	31739347	1968	15,7	1,0	1,2	0,0	171	149	1	1	0.929,1.0	1.0,1.0	-0.035
1970	ENSG00000088325.17	TPX2	chr20	+	31757406	31757582	31757409	31757582	31742540	31742647	1970	129,179	0,5	11,23	0,0	152	149	0.611648	1	1.0,0.972	1.0,1.0	-0.014
1971	ENSG00000088325.17	TPX2	chr20	+	31770342	31770471	31770345	31770471	31766555	31766682	1971	127,135	6,2	21,26	2,0	152	149	0.417363	0.983091	0.954,0.985	0.911,1.0	0.014
1972	ENSG00000088325.17	TPX2	chr20	+	31793847	31794024	31793853	31794024	31792734	31792830	1972	315,410	0,3	23,25	0,0	155	149	1	1	1.0,0.992	1.0,1.0	-0.004
1973	ENSG00000088325.17	TPX2	chr20	+	31798364	31798552	31798385	31798552	31797403	31797515	1973	387,504	31,43	17,17	0,0	170	149	0.000400495	0.00363846	0.916,0.911	1.0,1.0	-0.087
1976	ENSG00000171552.15	BCL2L1	chr20	-	31721843	31722348	31721843	31722330	31723734	31723960	1976	2,3	2,5	0,3	4,0	167	149	0.877823	1	0.472,0.349	0.0,1.0	-0.09
1977	ENSG00000171552.15	BCL2L1	chr20	-	31721654	31722348	31721654	31722330	31723863	31723989	1977	1,4	0,1	0,1	0,2	167	149	1	1	1.0,0.781	NA,0.308	0.583
1978	ENSG00000101898.8	MCTS2	chr20	+	31548379	31549114	31548676	31549114	31547447	31547692	1978	46,23	0,2	47,31	0,0	298	149	0.839519	1	1.0,0.852	1.0,1.0	-0.074
1979	ENSG00000101898.8	MCTS2	chr20	+	31548379	31549114	31549028	31549114	31547447	31547692	1979	71,33	0,0	27,29	0,1	298	149	1	1	1.0,1.0	1.0,0.935	0.032
1980	ENSG00000101898.8	MCTS2	chr20	+	31548676	31549114	31549028	31549114	31547447	31547692	1980	70,33	0,0	27,29	0,1	298	149	1	1	1.0,1.0	1.0,0.935	0.032
2031	ENSG00000100997.21	ABHD12	chr20	-	25303549	25303688	25303549	25303628	25306832	25306915	2031	3,0	34,23	0,0	1,2	209	149	0.481402	1	0.059,0.0	0.0,0.0	0.029
2035	ENSG00000197586.14	ENTPD6	chr20	+	25207075	25207397	25207078	25207397	25206521	25206590	2035	27,14	12,17	6,3	2,1	152	149	0.147931	0.457303	0.688,0.447	0.746,0.746	-0.178
2036	ENSG00000197586.14	ENTPD6	chr20	+	25217438	25217581	25217501	25217581	25216647	25216736	2036	2,2	78,53	0,0	17,8	212	149	0.536078	1	0.018,0.026	0.0,0.0	0.022
2037	ENSG00000197586.14	ENTPD6	chr20	+	25222819	25222978	25222837	25222978	25221231	25221333	2037	2,3	35,26	0,1	4,0	167	149	0.40406	0.963574	0.049,0.093	0.0,1.0	-0.429
2039	ENSG00000197586.14	ENTPD6	chr20	+	25223932	25224157	25224100	25224157	25222837	25222978	2039	3,8	51,37	9,4	10,8	298	149	0.000922229	0.00744432	0.029,0.098	0.31,0.2	-0.192
2040	ENSG00000197586.14	ENTPD6	chr20	+	25223935	25224157	25224100	25224157	25222837	25222978	2040	3,8	51,37	9,4	10,8	298	149	0.000922229	0.00744432	0.029,0.098	0.31,0.2	-0.192
2041	ENSG00000197586.14	ENTPD6	chr20	+	25225161	25225317	25225204	25225317	25224100	25224157	2041	21,6	22,15	4,12	6,1	192	149	0.110221	0.362452	0.426,0.237	0.341,0.903	-0.29
2060	ENSG00000125814.18	NAPB	chr20	-	23397071	23397200	23397071	23397188	23402992	23403072	2060	5,3	1,13	4,0	1,4	161	149	0.548008	1	0.822,0.176	0.787,0.0	0.105
2063	ENSG00000278041.2	ENSG00000278041	chr20	-	21501502	21501678	21501502	21501594	21501801	21502098	2063	7,8	5,0	20,1	0,1	233	149	0.0287764	0.125145	0.472,1.0	1.0,0.39	0.041
2064	ENSG00000278041.2	ENSG00000278041	chr20	-	21501801	21502098	21501801	21502076	21502170	21502315	2064	3,8	3,7	5,14	12,2	171	149	0.606823	1	0.466,0.499	0.266,0.859	-0.08
2068	ENSG00000089091.18	DZANK1	chr20	-	18389700	18389894	18389700	18389828	18390378	18390459	2068	0,0	4,0	0,3	4,3	215	149	1	1	0.0,NA	0.0,0.409	-0.204
2069	ENSG00000089091.18	DZANK1	chr20	-	18412645	18412853	18412645	18412835	18414347	18414512	2069	0,2	5,2	0,3	3,3	167	149	0.468206	1	0.0,0.472	0.0,0.472	0
2071	ENSG00000089091.18	DZANK1	chr20	-	18452614	18452739	18452614	18452682	18453730	18453827	2071	1,1	1,1	1,5	0,0	206	149	0.00641572	0.0368777	0.42,0.42	1.0,1.0	-0.58
2076	ENSG00000149474.15	KAT14	chr20	+	18161819	18162239	18161822	18162239	18159083	18159265	2076	28,27	12,11	0,1	2,0	152	149	0.0400957	0.164567	0.696,0.706	0.0,1.0	0.201
2077	ENSG00000149474.15	KAT14	chr20	+	18181693	18181846	18181709	18181846	18162376	18162945	2077	0,0	22,23	0,1	4,1	165	149	1	1	0.0,0.0	0.0,0.475	-0.237
2078	ENSG00000125844.18	RRBP1	chr20	-	17615430	17615529	17615430	17615523	17615925	17616009	2078	17,34	0,1	6,3	0,0	155	149	1	1	1.0,0.97	1.0,1.0	-0.015
2083	ENSG00000102178.13	UBL4A	chrX	-	154485770	154486083	154485770	154485979	154486227	154486333	2083	7,2	104,103	2,3	2,6	253	149	0.00668901	0.0381025	0.038,0.011	0.371,0.227	-0.274
2088	ENSG00000101247.19	NDUFAF5	chr20	+	13793159	13793227	13793179	13793227	13788588	13788652	2088	5,4	8,1	3,0	1,3	169	149	0.305714	0.79382	0.355,0.779	0.726,0.0	0.204
2089	ENSG00000101247.19	NDUFAF5	chr20	+	13793165	13793227	13793179	13793227	13788588	13788652	2089	1,1	8,1	1,0	1,3	163	149	1	1	0.103,0.478	0.478,0.0	0.051
2090	ENSG00000101247.19	NDUFAF5	chr20	+	13801485	13801683	13801507	13801683	13798460	13798500	2090	16,20	1,0	0,9	0,0	171	149	1	1	0.933,1.0	NA,1.0	-0.033
2108	ENSG00000089195.16	TRMT6	chr20	-	5941950	5942036	5941950	5942030	5942427	5942786	2108	17,4	2,0	0,1	0,0	155	149	1	1	0.891,1.0	NA,1.0	-0.054
2109	ENSG00000089195.16	TRMT6	chr20	-	5942427	5942786	5942427	5942669	5943558	5943683	2109	23,44	4,1	10,18	0,0	266	149	0.00790184	0.0436777	0.763,0.961	1.0,1.0	-0.138
2113	ENSG00000075043.22	KCNQ2	chr20	-	63438624	63438720	63438624	63438690	63439597	63439790	2113	163,138	3,0	16,11	0,0	179	149	1	1	0.978,1.0	1.0,1.0	-0.011
2114	ENSG00000075043.22	KCNQ2	chr20	-	63439597	63439790	63439597	63439708	63442405	63442531	2114	7,4	84,66	2,0	2,6	231	149	0.485242	1	0.051,0.038	0.392,0.0	-0.152
2121	ENSG00000101290.15	CDS2	chr20	+	5185757	5185826	5185769	5185826	5184857	5184945	2121	55,51	2,1	5,8	0,0	161	149	0.431458	0.999962	0.962,0.979	1.0,1.0	-0.03
2124	ENSG00000089057.16	SLC23A2	chr20	-	4970792	4970919	4970792	4970915	5001405	5001502	2124	8,10	1,5	0,1	1,2	153	149	0.000649269	0.00548431	0.886,0.661	0.0,0.327	0.61
2136	ENSG00000088836.15	SLC4A11	chr20	-	3228258	3228428	3228258	3228356	3228511	3228707	2136	12,11	1,0	7,13	0,1	221	149	1	1	0.89,1.0	1.0,0.898	-0.004
2137	ENSG00000088836.15	SLC4A11	chr20	-	3229094	3229263	3229094	3229213	3229345	3229452	2137	6,2	0,4	2,2	0,0	199	149	0.0107779	0.0558823	1.0,0.272	1.0,1.0	-0.364
2138	ENSG00000088836.15	SLC4A11	chr20	-	3229523	3229776	3229523	3229706	3230186	3230260	2138	11,10	1,0	9,5	0,0	219	149	1	1	0.882,1.0	1.0,1.0	-0.059
2141	ENSG00000088836.15	SLC4A11	chr20	-	3231329	3231548	3231329	3231476	3233513	3233637	2141	16,4	0,1	4,6	0,0	221	149	1	1	1.0,0.729	1.0,1.0	-0.135
2142	ENSG00000088836.15	SLC4A11	chr20	-	3234082	3234314	3234082	3234245	3234567	3234617	2142	12,4	0,0	4,4	0,1	218	149	1	1	1.0,1.0	1.0,0.732	0.134
2143	ENSG00000088836.15	SLC4A11	chr20	-	3234741	3234920	3234741	3234894	3237543	3237588	2143	0,0	19,16	1,1	0,3	175	149	0.460013	1	0.0,0.0	1.0,0.221	-0.611
2144	ENSG00000125877.14	ITPA	chr20	+	3213984	3214058	3213990	3214058	3213318	3213383	2144	91,51	0,0	4,8	0,1	155	149	1	1	1.0,1.0	1.0,0.885	0.057
2154	ENSG00000215305.11	VPS16	chr20	+	2860448	2860593	2860452	2860593	2860238	2860367	2154	40,17	0,0	3,2	0,2	153	149	0.491791	1	1.0,1.0	1.0,0.493	0.254
2159	ENSG00000215305.11	VPS16	chr20	+	2866154	2866315	2866211	2866315	2865398	2865495	2159	0,0	29,18	1,1	2,4	206	149	0.347766	0.871305	0.0,0.0	0.266,0.153	-0.21
2161	ENSG00000101365.23	IDH3B	chr20	-	2660029	2660176	2660029	2660167	2660262	2660365	2161	131,131	3,0	16,14	0,0	158	149	1	1	0.976,1.0	1.0,1.0	-0.012
2165	ENSG00000101361.18	NOP56	chr20	+	2654748	2654947	2654751	2654947	2654413	2654575	2165	478,367	1,3	74,72	1,1	152	149	1	1	0.998,0.992	0.986,0.986	0.009
2166	ENSG00000101361.18	NOP56	chr20	+	2655237	2655512	2655324	2655512	2654748	2654947	2166	24,26	685,620	37,24	166,184	236	149	2.46478e-11	1.24126e-09	0.022,0.026	0.123,0.076	-0.076
2167	ENSG00000101361.18	NOP56	chr20	+	2656728	2656895	2656773	2656895	2656400	2656549	2167	17,22	231,180	18,26	19,18	194	149	2.22045e-16	2.39381e-14	0.053,0.086	0.421,0.526	-0.404
2171	ENSG00000101298.16	SNPH	chr20	+	1295775	1296421	1296324	1296421	1266653	1266760	2171	2,0	7,1	0,0	0,1	298	149	1	1	0.125,0.0	NA,0.0	0.062
2185	ENSG00000099326.10	MZF1	chr19	-	58570343	58570572	58570343	58570527	58570993	58571429	2185	4,2	14,8	3,10	3,6	194	149	0.00422332	0.0261114	0.18,0.161	0.434,0.561	-0.327
2188	ENSG00000130726.13	TRIM28	chr19	+	58547791	58547906	58547801	58547906	58547596	58547713	2188	1247,957	0,2	47,78	0,0	159	149	1	1	1.0,0.998	1.0,1.0	-0.001
2189	ENSG00000130726.13	TRIM28	chr19	+	58548033	58548180	58548036	58548180	58547791	58547906	2189	1054,728	6,2	50,75	1,3	152	149	0.90372	1	0.994,0.997	0.98,0.961	0.025
2190	ENSG00000130726.13	TRIM28	chr19	+	58548718	58548776	58548739	58548776	58548485	58548592	2190	15,8	942,471	4,5	68,58	170	149	0.00957615	0.0508654	0.014,0.015	0.049,0.07	-0.045
2191	ENSG00000130726.13	TRIM28	chr19	+	58548861	58548910	58548864	58548910	58548739	58548776	2191	959,499	5,0	32,36	1,0	152	149	1	1	0.995,1.0	0.969,1.0	0.013
2192	ENSG00000130726.13	TRIM28	chr19	+	58548861	58548910	58548885	58548910	58548739	58548776	2192	1073,554	6,8	37,45	0,0	173	149	0.928787	1	0.994,0.984	1.0,1.0	-0.011
2193	ENSG00000130726.13	TRIM28	chr19	+	58548864	58548910	58548885	58548910	58548739	58548776	2193	119,55	6,8	6,9	0,0	170	149	0.00249629	0.0169692	0.946,0.858	1.0,1.0	-0.098
2197	ENSG00000130726.13	TRIM28	chr19	+	58550146	58550284	58550197	58550284	58549948	58550035	2197	2342,1423	4,2	141,111	0,0	200	149	1	1	0.998,0.998	1.0,1.0	-0.002
2203	ENSG00000142396.12	ERVK3-1	chr19	+	58311198	58312462	58312165	58312462	58306087	58306216	2203	24,15	56,39	9,15	0,3	298	149	2.42563e-07	5.51604e-06	0.176,0.161	1.0,0.714	-0.689
2204	ENSG00000142396.12	ERVK3-1	chr19	+	58311198	58312462	58312196	58312462	58306087	58306216	2204	48,38	1,2	8,7	0,0	298	149	0.833302	1	0.96,0.905	1.0,1.0	-0.068
2206	ENSG00000142396.12	ERVK3-1	chr19	+	58312027	58312462	58312165	58312462	58306087	58306216	2206	23,13	56,39	9,11	0,3	287	149	3.32605e-06	5.64902e-05	0.176,0.148	1.0,0.656	-0.666
2207	ENSG00000142396.12	ERVK3-1	chr19	+	58312027	58312462	58312196	58312462	58306087	58306216	2207	48,38	1,2	8,7	0,0	298	149	0.833302	1	0.96,0.905	1.0,1.0	-0.068
2208	ENSG00000142396.12	ERVK3-1	chr19	+	58312165	58312462	58312196	58312462	58306087	58306216	2208	82,66	1,2	1,4	0,0	180	149	0.446961	1	0.985,0.965	1.0,1.0	-0.025
2209	ENSG00000198131.16	ZNF544	chr19	+	58246710	58246794	58246745	58246794	58246300	58246427	2209	16,9	3,0	8,6	0,0	184	149	0.194213	0.563175	0.812,1.0	1.0,1.0	-0.094
2211	ENSG00000171606.19	ZNF274	chr19	+	58185696	58185838	58185711	58185838	58183920	58183998	2211	0,0	14,10	1,0	1,3	164	149	1	1	0.0,0.0	0.476,0.0	-0.238
2219	ENSG00000022277.14	RTF2	chr20	+	56516934	56516989	56516943	56516989	56513314	56513428	2219	52,57	1,1	3,4	0,0	158	149	1	1	0.98,0.982	1.0,1.0	-0.019
2220	ENSG00000022277.14	RTF2	chr20	+	56517105	56517201	56517108	56517201	56516934	56516989	2220	90,78	5,2	2,11	0,0	152	149	0.0643972	0.240071	0.946,0.975	1.0,1.0	-0.04
2225	ENSG00000160285.16	LSS	chr21	-	46196201	46196297	46196201	46196267	46205835	46205941	2225	2,3	95,44	7,6	15,36	179	149	0.000201724	0.00201364	0.017,0.054	0.28,0.122	-0.166
2228	ENSG00000160285.16	LSS	chr21	-	46215684	46215823	46215684	46215793	46216388	46216524	2228	1,2	145,115	2,2	39,44	179	149	0.527944	1	0.006,0.014	0.041,0.036	-0.028
2232	ENSG00000175556.19	LONRF3	chrX	+	119012879	119013201	119013038	119013201	119011814	119011973	2232	6,4	60,38	0,7	2,3	298	149	0.0961916	0.329328	0.048,0.05	0.0,0.538	-0.22
2233	ENSG00000175556.19	LONRF3	chrX	+	119013011	119013201	119013038	119013201	119011814	119011973	2233	1,1	60,38	0,0	2,3	176	149	1	1	0.014,0.022	0.0,0.0	0.018
2236	ENSG00000157625.17	TAB3	chrX	-	30842965	30846644	30842965	30843049	30852777	30852938	2236	57,75	1,5	5,15	0,0	298	149	0.0114815	0.0589008	0.966,0.882	1.0,1.0	-0.076
2238	ENSG00000198440.10	ZNF583	chr19	+	56414341	56414440	56414344	56414440	56413958	56414085	2238	0,5	10,18	0,0	0,3	152	149	1	1	0.0,0.214	NA,0.0	0.107
2239	ENSG00000267454.6	ZNF582-DT	chr19	+	56398276	56399168	56398893	56399168	56397880	56398048	2239	0,3	0,2	1,1	0,0	298	149	1	1	NA,0.429	1.0,1.0	-0.571
2243	ENSG00000167685.16	ZNF444	chr19	+	56159623	56160890	56159626	56160890	56158493	56158602	2243	27,8	8,5	2,5	1,0	152	149	0.00447123	0.0273881	0.768,0.611	0.662,1.0	-0.141
2244	ENSG00000063245.16	EPN1	chr19	+	55678506	55678855	55678526	55678855	55675193	55675435	2244	13,4	239,52	8,3	14,17	169	149	0.00141839	0.0107182	0.046,0.064	0.335,0.135	-0.18
2245	ENSG00000063245.16	EPN1	chr19	+	55678183	55678855	55678506	55678855	55675203	55675435	2245	7,8	5,0	10,5	0,0	298	149	0.0019635	0.0139877	0.412,1.0	1.0,1.0	-0.294
2246	ENSG00000063245.16	EPN1	chr19	+	55678183	55678855	55678526	55678855	55675203	55675435	2246	15,12	239,52	18,6	14,17	298	149	1.07518e-05	0.000160494	0.03,0.103	0.391,0.15	-0.204
2247	ENSG00000063245.16	EPN1	chr19	+	55678482	55678855	55678526	55678855	55675227	55675435	2247	8,4	239,52	9,4	14,17	193	149	1.31792e-05	0.000188976	0.025,0.056	0.332,0.154	-0.202
2249	ENSG00000063245.16	EPN1	chr19	+	55678506	55678855	55678526	55678855	55677045	55677218	2249	9,4	7,12	8,3	0,0	169	149	1.83542e-07	4.27881e-06	0.531,0.227	1.0,1.0	-0.621
2250	ENSG00000063245.16	EPN1	chr19	+	55678183	55678855	55678482	55678855	55677549	55677581	2250	6,8	2,0	12,4	0,0	298	149	0.550964	1	0.6,1.0	1.0,1.0	-0.2
2252	ENSG00000063245.16	EPN1	chr19	+	55678183	55678855	55678526	55678855	55677549	55677581	2252	14,12	1,2	18,6	6,0	298	149	0.465721	1	0.875,0.75	0.6,1.0	0.012
2254	ENSG00000063245.16	EPN1	chr19	+	55678482	55678855	55678526	55678855	55677549	55677581	2254	10,4	1,2	9,4	6,0	193	149	0.530455	1	0.885,0.607	0.537,1.0	-0.022
2255	ENSG00000063245.16	EPN1	chr19	+	55678506	55678855	55678526	55678855	55677549	55677581	2255	8,4	1,2	8,3	6,0	169	149	0.525367	1	0.876,0.638	0.54,1.0	-0.013
2258	ENSG00000063245.16	EPN1	chr19	+	55692950	55693037	55692953	55693037	55692685	55692796	2258	156,41	100,28	5,6	6,5	152	149	0.38277	0.929887	0.605,0.589	0.45,0.541	0.101
2263	ENSG00000173581.9	CCDC106	chr19	+	55648757	55649077	55648945	55649077	55648232	55648277	2263	54,18	7,2	8,13	0,0	298	149	0.000190677	0.00192583	0.794,0.818	1.0,1.0	-0.194
2264	ENSG00000063241.9	ISOC2	chr19	-	55455259	55455378	55455259	55455330	55455635	55455845	2264	16,18	79,47	3,3	1,6	197	149	0.181551	0.534444	0.133,0.225	0.694,0.274	-0.305
2265	ENSG00000063241.9	ISOC2	chr19	-	55455259	55455378	55455259	55455330	55456348	55456489	2265	18,19	29,13	3,3	1,1	197	149	0.0889586	0.30996	0.319,0.525	0.694,0.694	-0.272
2266	ENSG00000063241.9	ISOC2	chr19	-	55456348	55456575	55456348	55456489	55461511	55461642	2266	5,2	220,101	2,2	4,2	235	149	0.00617873	0.0356694	0.014,0.012	0.241,0.388	-0.301
2267	ENSG00000063241.9	ISOC2	chr19	-	55456348	55456777	55456348	55456489	55461511	55461642	2267	6,2	220,101	3,2	4,2	298	149	0.000700394	0.00585835	0.013,0.01	0.273,0.333	-0.292
2270	ENSG00000133265.12	HSPBP1	chr19	-	55277641	55277846	55277641	55277780	55279398	55279705	2270	216,94	2,0	12,17	0,0	215	149	1	1	0.987,1.0	1.0,1.0	-0.006
2272	ENSG00000133265.12	HSPBP1	chr19	-	55279398	55279705	55279398	55279702	55280034	55280108	2272	1,0	41,87	0,4	2,4	152	149	0.0080991	0.0445818	0.023,0.0	0.0,0.495	-0.236
2273	ENSG00000105063.20	PPP6R1	chr19	-	55239825	55239914	55239825	55239911	55239998	55240114	2273	11,2	148,130	4,6	46,44	152	149	0.107037	0.355863	0.068,0.015	0.079,0.118	-0.057
2274	ENSG00000105063.20	PPP6R1	chr19	-	55240235	55240363	55240235	55240300	55240944	55241079	2274	2,4	124,63	8,5	30,36	212	149	0.000304861	0.0028924	0.011,0.043	0.158,0.089	-0.097
2276	ENSG00000105063.20	PPP6R1	chr19	-	55241476	55241681	55241476	55241639	55242165	55242279	2276	5,2	141,48	0,0	6,11	191	149	0.145398	0.451294	0.027,0.031	0.0,0.0	0.029
2277	ENSG00000105063.20	PPP6R1	chr19	-	55241476	55241837	55241476	55241639	55242165	55242279	2277	11,4	141,48	3,7	6,11	298	149	0.000568293	0.0049144	0.038,0.04	0.2,0.241	-0.181
2278	ENSG00000105063.20	PPP6R1	chr19	-	55241476	55241837	55241476	55241681	55242165	55242279	2278	13,2	3,0	7,14	0,0	298	149	0.0696404	0.255559	0.684,1.0	1.0,1.0	-0.158
2283	ENSG00000167646.15	DNAAF3	chr19	-	55159532	55159720	55159532	55159607	55159898	55160010	2283	44,20	77,40	3,2	3,6	262	149	0.598183	1	0.245,0.221	0.363,0.159	-0.028
2284	ENSG00000167646.15	DNAAF3	chr19	-	55159898	55160013	55159898	55160010	55160639	55160775	2284	34,20	22,15	3,5	0,1	152	149	0.00035018	0.00323179	0.602,0.567	1.0,0.831	-0.331
2285	ENSG00000167646.15	DNAAF3	chr19	-	55160639	55160923	55160639	55160775	55161064	55161187	2285	1,1	2,0	0,2	0,0	297	149	1	1	0.201,1.0	NA,1.0	-0.399
2286	ENSG00000167646.15	DNAAF3	chr19	-	55165857	55166063	55165857	55166000	55166328	55166417	2286	1,0	4,0	0,1	0,0	212	149	1	1	0.149,NA	NA,1.0	-0.851
2287	ENSG00000167646.15	DNAAF3	chr19	-	55165857	55166077	55165857	55166000	55166328	55166417	2287	1,0	4,0	0,1	0,0	226	149	1	1	0.142,NA	NA,1.0	-0.858
2290	ENSG00000131037.16	EPS8L1	chr19	+	55081968	55082180	55082091	55082180	55081772	55081899	2290	0,0	7,3	1,1	1,0	272	149	0.0173935	0.0830803	0.0,0.0	0.354,1.0	-0.677
2324	ENSG00000170889.15	RPS9	chr19	+	54201159	54201281	54201165	54201281	54200855	54200888	2324	514,337	1,2	17,32	0,0	155	149	1	1	0.998,0.994	1.0,1.0	-0.004
2327	ENSG00000170889.15	RPS9	chr19	+	54206552	54207647	54207370	54207647	54206275	54206462	2327	43,31	1,3	24,28	0,0	298	149	0.0407116	0.166371	0.956,0.838	1.0,1.0	-0.103
2328	ENSG00000170889.15	RPS9	chr19	+	54206552	54207647	54207397	54207647	54206275	54206462	2328	63,34	1728,1152	28,25	18,18	298	149	0	0	0.018,0.015	0.437,0.41	-0.407
2329	ENSG00000170889.15	RPS9	chr19	+	54207352	54207644	54207397	54207644	54206275	54206462	2329	31,16	1728,1152	10,8	18,18	194	149	9.99201e-16	9.69491e-14	0.014,0.011	0.299,0.254	-0.264
2330	ENSG00000170889.15	RPS9	chr19	+	54207370	54207647	54207397	54207647	54206275	54206462	2330	23,12	1728,1152	5,1	18,18	176	149	0.0016214	0.0119025	0.011,0.009	0.19,0.045	-0.107
2331	ENSG00000105619.15	TFPT	chr19	-	54108025	54108238	54108025	54108207	54108325	54108395	2331	5,1	1,0	2,3	0,0	180	149	1	1	0.805,1.0	1.0,1.0	-0.097
2332	ENSG00000105619.15	TFPT	chr19	-	54108025	54108244	54108025	54108207	54108325	54108395	2332	22,14	1,0	3,4	0,0	186	149	1	1	0.946,1.0	1.0,1.0	-0.027
2334	ENSG00000105619.15	TFPT	chr19	-	54108325	54108442	54108325	54108395	54110050	54110121	2334	2,0	13,18	0,0	0,2	196	149	1	1	0.105,0.0	NA,0.0	0.052
2335	ENSG00000170906.17	NDUFA3	chr19	+	54106763	54106961	54106810	54106961	54106352	54106446	2335	12,9	21,5	5,3	2,6	196	149	0.899095	1	0.303,0.578	0.655,0.275	-0.025
2350	ENSG00000203326.13	ZNF525	chr19	+	53380721	53386581	53384969	53386581	53375769	53375896	2350	4,6	1,0	2,4	0,0	298	149	1	1	0.667,1.0	1.0,1.0	-0.166
2353	ENSG00000213793.7	ZNF888	chr19	-	52917858	52917997	52917858	52917931	52918818	52918937	2353	1,2	2,0	0,5	1,1	215	149	0.34005	0.856688	0.257,1.0	0.0,0.776	0.241
2355	ENSG00000204604.14	ZNF468	chr19	-	52853871	52854126	52853871	52854107	52854257	52854345	2355	0,6	0,0	1,1	2,0	168	149	1	1	NA,1.0	0.307,1.0	0.347
2360	ENSG00000167562.15	ZNF701	chr19	+	52572564	52574162	52574076	52574162	52570286	52570330	2360	2,0	6,3	0,0	0,3	298	149	1	1	0.143,0.0	NA,0.0	0.071
2361	ENSG00000167562.15	ZNF701	chr19	+	52574025	52574162	52574076	52574162	52570286	52570330	2361	1,0	6,3	0,0	0,3	200	149	1	1	0.11,0.0	NA,0.0	0.055
2362	ENSG00000197608.13	ZNF841	chr19	-	52093845	52093935	52093845	52093911	52095574	52095760	2362	8,5	0,0	0,2	0,1	173	149	1	1	1.0,1.0	NA,0.633	0.367
2365	ENSG00000185513.18	L3MBTL1	chr20	+	43515918	43516177	43516092	43516177	43515291	43515415	2365	0,3	3,2	5,10	0,1	298	149	1.08485e-05	0.000161276	0.0,0.429	1.0,0.833	-0.702
2366	ENSG00000185513.18	L3MBTL1	chr20	+	43529202	43529368	43529263	43529368	43528656	43528745	2366	4,0	2,0	2,13	4,0	210	149	1	1	0.587,NA	0.262,1.0	-0.044
2367	ENSG00000185513.18	L3MBTL1	chr20	+	43530283	43532924	43532772	43532924	43529202	43529368	2367	4,11	4,0	8,23	0,0	298	149	0.00744792	0.0415314	0.333,1.0	1.0,1.0	-0.334
2369	ENSG00000185513.18	L3MBTL1	chr20	+	43534283	43534942	43534827	43534942	43534007	43534093	2369	7,2	2,0	29,16	0,0	298	149	0.646515	1	0.636,1.0	1.0,1.0	-0.182
2373	ENSG00000185513.18	L3MBTL1	chr20	+	43540021	43540308	43540150	43540308	43536408	43536458	2373	4,2	3,7	12,1	2,2	278	149	0.148312	0.457956	0.417,0.133	0.763,0.211	-0.212
2379	ENSG00000198093.12	ZNF649	chr19	-	51896471	51896591	51896471	51896567	51896851	51896978	2379	0,0	32,39	0,2	10,19	173	149	0.388624	0.938604	0.0,0.0	0.0,0.083	-0.042
2380	ENSG00000161551.16	ZNF577	chr19	-	51867047	51873706	51867047	51873529	51877281	51877377	2380	1,11	0,0	10,8	1,1	298	149	0.15105	0.464282	1.0,1.0	0.833,0.8	0.183
2382	ENSG00000161551.16	ZNF577	chr19	-	51880322	51880401	51880322	51880389	51880678	51880877	2382	0,1	0,2	2,5	1,0	161	149	1	1	NA,0.316	0.649,1.0	-0.508
2386	ENSG00000105497.9	ZNF175	chr19	+	51581367	51581517	51581390	51581517	51573327	51573401	2386	0,2	18,19	0,2	1,2	172	149	0.454121	1	0.0,0.084	0.0,0.464	-0.19
2415	ENSG00000062822.17	POLD1	chr19	+	50398847	50399053	50398850	50399053	50384335	50384390	2415	12,6	48,53	2,2	27,32	152	149	0.0266646	0.117921	0.197,0.1	0.068,0.058	0.086
2416	ENSG00000062822.17	POLD1	chr19	+	50398847	50399053	50398850	50399053	50387659	50387804	2416	6,6	2,2	2,1	4,0	152	149	0.839581	1	0.746,0.746	0.329,1.0	0.082
2417	ENSG00000062822.17	POLD1	chr19	+	50398847	50399053	50398850	50399053	50395024	50395150	2417	6,6	12,8	2,1	0,0	152	149	9.3447e-06	0.000141608	0.329,0.424	1.0,1.0	-0.623
2418	ENSG00000062822.17	POLD1	chr19	+	50401669	50401924	50401777	50401924	50399370	50399484	2418	2,0	116,25	13,11	21,37	257	149	1.84992e-10	7.89553e-09	0.01,0.0	0.264,0.147	-0.201
2419	ENSG00000062822.17	POLD1	chr19	+	50401998	50402373	50402204	50402373	50401777	50401924	2419	96,15	2,0	42,70	0,0	298	149	0.32759	0.835039	0.96,1.0	1.0,1.0	-0.02
2421	ENSG00000062822.17	POLD1	chr19	+	50408706	50408901	50408784	50408901	50407326	50407415	2421	2,16	82,27	8,12	27,46	227	149	0.338923	0.854589	0.016,0.28	0.163,0.146	-0.006
2422	ENSG00000062822.17	POLD1	chr19	+	50409121	50409235	50409145	50409235	50408706	50408901	2422	72,47	1,0	16,34	0,0	173	149	1	1	0.984,1.0	1.0,1.0	-0.008
2425	ENSG00000131408.16	NR1H2	chr19	+	50377552	50377648	50377586	50377648	50376718	50376826	2425	2,0	32,20	1,3	4,13	183	149	0.0368611	0.152973	0.048,0.0	0.169,0.158	-0.14
2429	ENSG00000131408.16	NR1H2	chr19	+	50379001	50379181	50379133	50379181	50378521	50378796	2429	82,35	0,2	13,15	0,0	281	149	0.904174	1	1.0,0.903	1.0,1.0	-0.048
2430	ENSG00000131408.16	NR1H2	chr19	+	50379091	50379181	50379133	50379181	50378521	50378796	2430	10,4	0,2	6,5	0,0	191	149	0.561627	1	1.0,0.609	1.0,1.0	-0.196
2431	ENSG00000131408.16	NR1H2	chr19	+	50381878	50382174	50381965	50382174	50379779	50379879	2431	5,0	23,11	3,1	0,7	236	149	0.144462	0.449254	0.121,0.0	1.0,0.083	-0.481
2434	ENSG00000142528.17	ZNF473	chr19	+	50030891	50031091	50031013	50031091	50025892	50026122	2434	27,15	6,7	11,7	2,12	271	149	0.3378	0.853235	0.712,0.541	0.751,0.243	0.13
2436	ENSG00000105053.12	VRK3	chr19	-	50009235	50009385	50009235	50009289	50016023	50016163	2436	91,129	0,1	28,24	0,0	245	149	1	1	1.0,0.987	1.0,1.0	-0.006
2443	ENSG00000213024.14	NUP62	chr19	-	49911104	49911370	49911104	49911366	49927693	49927815	2443	0,0	0,1	1,0	0,0	153	149	1	1	NA,0.0	1.0,NA	-1
2445	ENSG00000213024.14	NUP62	chr19	-	49918507	49918621	49918507	49918591	49927693	49927815	2445	3,0	0,1	8,5	0,0	179	149	1	1	1.0,0.0	1.0,1.0	-0.5
2446	ENSG00000213024.14	NUP62	chr19	-	49927693	49927848	49927693	49927815	49929325	49929465	2446	40,27	12,17	15,23	2,2	182	149	0.00252385	0.0171016	0.732,0.565	0.86,0.904	-0.234
2451	ENSG00000104946.15	TBC1D17	chr19	+	49881267	49881475	49881273	49881475	49880278	49880402	2451	38,18	0,0	19,14	2,0	155	149	0.491002	1	1.0,1.0	0.901,1.0	0.049
2457	ENSG00000104946.15	TBC1D17	chr19	+	49888156	49888317	49888230	49888317	49887717	49887834	2457	11,11	43,25	13,10	21,8	223	149	0.0302488	0.130057	0.146,0.227	0.293,0.455	-0.188
2466	ENSG00000039650.13	PNKP	chr19	-	49865126	49865279	49865126	49865242	49866398	49866445	2466	47,26	1,0	43,30	0,1	186	149	1	1	0.974,1.0	1.0,0.96	0.007
2467	ENSG00000039650.13	PNKP	chr19	-	49865126	49865300	49865126	49865242	49866398	49866445	2467	53,30	1,0	50,35	0,1	207	149	1	1	0.974,1.0	1.0,0.962	0.006
2468	ENSG00000039650.13	PNKP	chr19	-	49865126	49865393	49865126	49865242	49866398	49866445	2468	82,54	1,0	91,74	0,1	298	149	1	1	0.976,1.0	1.0,0.974	0.001
2469	ENSG00000039650.13	PNKP	chr19	-	49865126	49865426	49865126	49865242	49866398	49866445	2469	130,69	1,0	104,94	0,1	298	149	1	1	0.985,1.0	1.0,0.979	0.003
2470	ENSG00000039650.13	PNKP	chr19	-	49865126	49865453	49865126	49865242	49866398	49866445	2470	82,54	1,0	88,74	0,1	298	149	1	1	0.976,1.0	1.0,0.974	0.001
2471	ENSG00000039650.13	PNKP	chr19	-	49865126	49865300	49865126	49865279	49866398	49866445	2471	6,4	0,0	7,6	0,1	170	149	1	1	1.0,1.0	1.0,0.84	0.08
2472	ENSG00000039650.13	PNKP	chr19	-	49865126	49865393	49865126	49865279	49866398	49866445	2472	35,29	0,0	48,45	0,1	263	149	1	1	1.0,1.0	1.0,0.962	0.019
2473	ENSG00000039650.13	PNKP	chr19	-	49865126	49865426	49865126	49865279	49866398	49866445	2473	89,48	0,0	66,65	0,1	296	149	1	1	1.0,1.0	1.0,0.97	0.015
2474	ENSG00000039650.13	PNKP	chr19	-	49865126	49865453	49865126	49865279	49866398	49866445	2474	42,33	0,0	50,45	0,1	298	149	1	1	1.0,1.0	1.0,0.957	0.022
2478	ENSG00000039650.13	PNKP	chr19	-	49865126	49865426	49865126	49865393	49866398	49866445	2478	54,19	0,0	21,20	3,0	182	149	0.335761	0.849856	1.0,1.0	0.851,1.0	0.075
2479	ENSG00000039650.13	PNKP	chr19	-	49865126	49865453	49865126	49865393	49866398	49866445	2479	8,4	0,0	6,6	3,0	209	149	0.0758118	0.272953	1.0,1.0	0.588,1.0	0.206
2480	ENSG00000039650.13	PNKP	chr19	-	49865126	49865453	49865126	49865426	49866398	49866445	2480	2,0	48,15	1,6	16,20	176	149	0.00573468	0.0334788	0.034,0.0	0.05,0.203	-0.11
2481	ENSG00000039650.13	PNKP	chr19	-	49865126	49865426	49865126	49865242	49867053	49867217	2481	82,55	1,0	88,74	0,0	298	149	1	1	0.976,1.0	1.0,1.0	-0.012
2482	ENSG00000039650.13	PNKP	chr19	-	49866398	49866528	49866398	49866445	49867053	49867217	2482	9,3	43,19	18,26	23,22	232	149	8.74546e-06	0.000133699	0.118,0.092	0.334,0.431	-0.278
2483	ENSG00000104960.15	PTOV1	chr19	+	49857903	49857977	49857908	49857977	49857692	49857782	2483	386,204	0,0	38,37	2,0	154	149	0.437865	1	1.0,1.0	0.948,1.0	0.026
2484	ENSG00000104960.15	PTOV1	chr19	+	49859985	49860183	49860055	49860183	49858548	49858653	2484	883,509	12,9	68,63	0,0	219	149	0.0570219	0.218107	0.98,0.975	1.0,1.0	-0.022
2485	ENSG00000104960.15	PTOV1	chr19	+	49859985	49860183	49860093	49860183	49858548	49858653	2485	1011,547	14,19	79,78	0,0	257	149	0.00389392	0.0244533	0.977,0.943	1.0,1.0	-0.04
2486	ENSG00000104960.15	PTOV1	chr19	+	49860055	49860183	49860093	49860183	49858548	49858653	2486	140,47	14,19	11,15	0,0	187	149	3.14367e-05	0.000396817	0.888,0.663	1.0,1.0	-0.224
2487	ENSG00000104960.15	PTOV1	chr19	+	49860565	49860740	49860613	49860740	49860267	49860336	2487	79,18	163,45	10,11	13,22	197	149	0.527897	1	0.268,0.232	0.368,0.274	-0.071
2489	ENSG00000126461.16	SCAF1	chr19	+	49646504	49646626	49646525	49646626	49646107	49646202	2489	0,0	159,68	1,1	10,14	170	149	0.207766	0.59221	0.0,0.0	0.081,0.059	-0.07
2490	ENSG00000126461.16	SCAF1	chr19	+	49646714	49646830	49646717	49646830	49646525	49646626	2490	229,86	4,0	20,23	1,0	152	149	1	1	0.982,1.0	0.951,1.0	0.015
2495	ENSG00000104870.14	FCGRT	chr19	+	49513863	49514133	49513881	49514133	49513245	49513473	2495	0,0	9,3	2,0	0,0	167	149	1	1	0.0,0.0	1.0,NA	-1
2498	ENSG00000142541.19	RPL13A	chr19	+	49490126	49490297	49490231	49490297	49489849	49489922	2498	34,16	8126,8806	20,22	86,59	254	149	0	0	0.002,0.001	0.12,0.179	-0.148
2499	ENSG00000142541.19	RPL13A	chr19	+	49490231	49490576	49490474	49490576	49489849	49489922	2499	8136,8826	0,2	105,106	0,0	298	149	1	1	1.0,1.0	1.0,1.0	0
2500	ENSG00000142541.19	RPL13A	chr19	+	49490474	49490576	49490479	49490576	49490231	49490297	2500	10724,11198	8,3	111,84	0,0	154	149	1	1	0.999,1.0	1.0,1.0	0
2501	ENSG00000142541.19	RPL13A	chr19	+	49491039	49491099	49491045	49491099	49490778	49490864	2501	3216,2008	0,3	33,38	0,0	155	149	1	1	1.0,0.998	1.0,1.0	-0.001
2517	ENSG00000161618.11	ALDH16A1	chr19	+	49461618	49462036	49461883	49462036	49460821	49460899	2517	13,6	1,1	0,8	0,2	298	149	1	1	0.867,0.75	NA,0.667	0.141
2518	ENSG00000161618.11	ALDH16A1	chr19	+	49461618	49462036	49461887	49462036	49460821	49460899	2518	13,6	9,0	0,8	0,0	298	149	1	1	0.419,1.0	NA,1.0	-0.29
2519	ENSG00000161618.11	ALDH16A1	chr19	+	49461883	49462036	49461887	49462036	49460821	49460899	2519	1,1	9,0	0,2	0,0	153	149	1	1	0.098,1.0	NA,1.0	-0.451
2521	ENSG00000161618.11	ALDH16A1	chr19	+	49464069	49464263	49464126	49464263	49463853	49463949	2521	2,0	51,3	0,1	8,6	206	149	0.610615	1	0.028,0.0	0.0,0.108	-0.04
2522	ENSG00000161618.11	ALDH16A1	chr19	+	49465737	49465905	49465780	49465905	49464631	49464762	2522	27,1	0,0	1,9	1,0	192	149	1	1	1.0,1.0	0.437,1.0	0.281
2533	ENSG00000196337.15	CGB7	chr19	-	49055360	49056796	49055360	49056595	49057120	49057248	2533	0,1	2,0	0,0	0,1	298	149	1	1	0.0,1.0	NA,0.0	0.5
2534	ENSG00000104812.16	GYS1	chr19	-	48981529	48981702	48981529	48981636	48982254	48982375	2534	2,0	80,93	4,1	14,24	215	149	0.022312	0.102258	0.017,0.0	0.165,0.028	-0.088
2535	ENSG00000104812.16	GYS1	chr19	-	48985849	48986059	48985849	48986035	48987193	48987385	2535	3,7	87,64	4,5	8,11	173	149	0.00105639	0.00831963	0.029,0.086	0.301,0.281	-0.234
2536	ENSG00000087088.22	BAX	chr19	+	48955547	48955833	48955686	48955833	48954870	48954936	2536	39,16	1,0	37,10	0,0	288	149	1	1	0.953,1.0	1.0,1.0	-0.024
2552	ENSG00000105552.16	BCAT2	chr19	-	48796427	48796502	48796427	48796448	48796613	48796718	2552	150,101	2,3	8,9	0,0	203	149	0.444457	1	0.982,0.961	1.0,1.0	-0.028
2553	ENSG00000105552.16	BCAT2	chr19	-	48799980	48800112	48799980	48800100	48800186	48800297	2553	1,0	95,35	0,0	2,7	161	149	1	1	0.01,0.0	0.0,0.0	0.005
2556	ENSG00000105538.11	RASIP1	chr19	-	48720586	48721027	48720586	48720997	48721853	48722001	2556	0,1	0,1	0,0	0,1	179	149	1	1	NA,0.454	NA,0.0	0.454
2558	ENSG00000176909.13	MAMSTR	chr19	-	48715624	48715917	48715624	48715767	48716704	48716743	2558	1,0	1,0	1,0	0,0	298	149	1	1	0.333,NA	1.0,NA	-0.667
2559	ENSG00000063180.10	CA11	chr19	-	48638887	48639077	48638887	48639053	48639304	48639459	2559	10,3	26,18	1,2	1,3	173	149	0.736717	1	0.249,0.126	0.463,0.365	-0.227
2563	ENSG00000063180.10	CA11	chr19	-	48640094	48640298	48640094	48640280	48644426	48644569	2563	1,0	23,16	0,0	1,1	167	149	1	1	0.037,0.0	0.0,0.0	0.018
2565	ENSG00000105438.10	KDELR1	chr19	-	48382574	48383369	48382574	48383327	48384229	48384482	2565	9,3	499,464	1,2	27,12	191	149	0.802516	1	0.014,0.005	0.028,0.115	-0.062
2567	ENSG00000105486.16	LIG1	chr19	-	48123173	48123353	48123173	48123318	48127276	48127348	2567	2,1	75,52	6,3	14,57	184	149	0.0035641	0.0227708	0.021,0.015	0.258,0.041	-0.132
2569	ENSG00000105486.16	LIG1	chr19	-	48136033	48136227	48136033	48136125	48137007	48137084	2569	16,4	77,33	32,25	41,32	251	149	8.12028e-07	1.61452e-05	0.11,0.067	0.317,0.317	-0.229
2570	ENSG00000105486.16	LIG1	chr19	-	48137521	48137759	48137521	48137688	48139970	48140143	2570	9,2	74,29	20,23	4,0	220	149	0	0	0.076,0.045	0.772,1.0	-0.826
2573	ENSG00000105486.16	LIG1	chr19	-	48150087	48150210	48150087	48150207	48151231	48151336	2573	61,38	1,2	56,29	0,0	152	149	0.427715	0.99823	0.984,0.949	1.0,1.0	-0.034
2574	ENSG00000105486.16	LIG1	chr19	-	48151231	48151339	48151231	48151336	48151467	48151734	2574	1,4	0,0	3,2	0,2	152	149	0.494752	1	1.0,1.0	1.0,0.495	0.252
2575	ENSG00000105486.16	LIG1	chr19	-	48150087	48150210	48150087	48150207	48153871	48153967	2575	1,2	0,4	0,3	0,0	152	149	1	1	1.0,0.329	NA,1.0	-0.336
2576	ENSG00000105486.16	LIG1	chr19	-	48151231	48151339	48151231	48151336	48153871	48153967	2576	30,17	6,6	2,15	9,4	152	149	0.0964994	0.330304	0.831,0.735	0.179,0.786	0.3
2578	ENSG00000105486.16	LIG1	chr19	-	48157013	48157140	48157013	48157137	48161371	48161507	2578	183,95	0,1	85,75	0,0	152	149	1	1	1.0,0.989	1.0,1.0	-0.006
2580	ENSG00000105499.15	PLA2G4C	chr19	-	48088685	48088745	48088685	48088712	48090363	48090417	2580	1,0	0,2	0,0	0,1	182	149	1	1	1.0,0.0	NA,0.0	0.5
2585	ENSG00000105373.20	NOP53	chr19	+	47754708	47754891	47754723	47754891	47754526	47754631	2585	130,123	1,1	10,18	0,0	164	149	1	1	0.992,0.991	1.0,1.0	-0.008
2586	ENSG00000105373.20	NOP53	chr19	+	47754711	47754891	47754723	47754891	47754526	47754631	2586	3,2	1,1	0,4	0,0	161	149	1	1	0.735,0.649	NA,1.0	-0.308
2591	ENSG00000063169.13	BICRA	chr19	+	47694114	47694726	47694663	47694726	47679320	47681276	2591	31,14	0,0	27,28	0,2	298	149	0.640285	1	1.0,1.0	1.0,0.875	0.062
2592	ENSG00000118162.15	KPTN	chr19	-	47477705	47477892	47477705	47477781	47479862	47479940	2592	1,1	22,12	1,1	1,7	260	149	0.424017	0.993902	0.025,0.046	0.364,0.076	-0.184
2593	ENSG00000118162.15	KPTN	chr19	-	47477705	47477895	47477705	47477781	47479862	47479940	2593	1,1	22,12	1,1	1,7	263	149	0.426789	0.997188	0.025,0.045	0.362,0.075	-0.183
2596	ENSG00000130751.11	NPAS1	chr19	+	47035859	47036129	47035963	47036129	47032642	47032732	2596	1,3	13,12	7,21	4,2	253	149	8.33396e-07	1.65024e-05	0.043,0.128	0.508,0.861	-0.599
2597	ENSG00000130751.11	NPAS1	chr19	+	47039403	47039564	47039406	47039564	47039035	47039151	2597	6,2	10,10	1,0	1,10	152	149	0.00683151	0.0387294	0.37,0.164	0.495,0.0	0.02
2598	ENSG00000130751.11	NPAS1	chr19	+	47040977	47041125	47041024	47041125	47040443	47040550	2598	3,2	0,5	1,2	0,0	196	149	0.00477536	0.0288504	1.0,0.233	1.0,1.0	-0.383
2606	ENSG00000176182.7	MYPOP	chr19	-	45901274	45902378	45901274	45901825	45902569	45902613	2606	2,0	1,0	2,2	0,0	298	149	1	1	0.5,NA	1.0,1.0	-0.5
2610	ENSG00000125755.21	SYMPK	chr19	-	45816481	45816614	45816481	45816577	45816797	45816974	2610	12,4	118,71	2,7	18,25	186	149	0.128902	0.409973	0.075,0.043	0.082,0.183	-0.074
2611	ENSG00000125755.21	SYMPK	chr19	-	45827836	45827945	45827836	45827918	45828969	45829205	2611	5,8	225,134	12,17	39,28	176	149	5.847e-11	2.74507e-09	0.018,0.048	0.207,0.339	-0.24
2612	ENSG00000125755.21	SYMPK	chr19	-	45827836	45827978	45827836	45827918	45828969	45829205	2612	7,8	225,134	18,29	39,28	209	149	7.54952e-15	6.38812e-13	0.022,0.041	0.248,0.425	-0.305
2613	ENSG00000125755.21	SYMPK	chr19	-	45827836	45827981	45827836	45827918	45828969	45829205	2613	7,8	225,134	19,31	39,28	212	149	2.10942e-15	1.91878e-13	0.021,0.04	0.255,0.438	-0.316
2614	ENSG00000125755.21	SYMPK	chr19	-	45827836	45827978	45827836	45827945	45828969	45829205	2614	4,0	2,0	6,12	0,0	182	149	1	1	0.621,NA	1.0,1.0	-0.379
2615	ENSG00000125755.21	SYMPK	chr19	-	45827836	45827981	45827836	45827945	45828969	45829205	2615	4,0	2,0	7,14	0,0	185	149	1	1	0.617,NA	1.0,1.0	-0.383
2618	ENSG00000125755.21	SYMPK	chr19	-	45854390	45854507	45854390	45854497	45863057	45863147	2618	94,76	5,1	25,22	0,0	159	149	0.0859847	0.301566	0.946,0.986	1.0,1.0	-0.034
2619	ENSG00000125755.21	SYMPK	chr19	-	45854390	45854585	45854390	45854507	45863057	45863165	2619	14,17	87,57	32,29	17,16	227	149	2.73226e-13	1.84099e-11	0.096,0.164	0.553,0.543	-0.418
2620	ENSG00000011478.13	QPCTL	chr19	+	45695400	45695718	45695436	45695718	45693412	45693556	2620	11,5	44,10	6,3	0,2	185	149	0.000290533	0.00277456	0.168,0.287	1.0,0.547	-0.546
2621	ENSG00000011478.13	QPCTL	chr19	+	45695400	45695718	45695632	45695718	45693412	45693556	2621	27,7	1,1	7,10	0,1	298	149	0.594522	1	0.931,0.778	1.0,0.833	-0.062
2622	ENSG00000011478.13	QPCTL	chr19	+	45695436	45695718	45695632	45695718	45693412	45693556	2622	68,15	1,1	7,12	0,1	298	149	0.747926	1	0.971,0.882	1.0,0.857	-0.002
2626	ENSG00000125753.16	VASP	chr19	+	45522717	45522818	45522720	45522818	45522312	45522581	2626	23,20	7,5	3,1	0,0	152	149	0.000337122	0.00312364	0.763,0.797	1.0,1.0	-0.22
2634	ENSG00000012061.18	ERCC1	chr19	-	45416820	45416897	45416820	45416893	45419097	45419197	2634	121,99	0,0	10,11	1,0	153	149	1	1	1.0,1.0	0.907,1.0	0.046
2635	ENSG00000012061.18	ERCC1	chr19	-	45416820	45416897	45416820	45416893	45421177	45421393	2635	3,0	0,0	1,3	0,1	153	149	1	1	1.0,NA	1.0,0.745	0.127
2638	ENSG00000104884.18	ERCC2	chr19	-	45368629	45368746	45368629	45368743	45368929	45369147	2638	2,6	46,35	3,1	13,18	152	149	0.957069	1	0.041,0.144	0.184,0.052	-0.025
2639	ENSG00000104884.18	ERCC2	chr19	-	45368929	45369147	45368929	45368992	45370132	45370232	2639	59,17	8,2	18,20	1,3	298	149	0.431455	0.999962	0.787,0.81	0.9,0.769	-0.036
2643	ENSG00000104859.16	CLASRP	chr19	+	45039917	45040311	45040183	45040311	45039073	45039108	2643	12,4	37,19	11,6	17,40	298	149	0.846071	1	0.14,0.095	0.244,0.07	-0.039
2645	ENSG00000104859.16	CLASRP	chr19	+	45069940	45070104	45070021	45070104	45069201	45069248	2645	8,2	84,79	14,20	60,54	230	149	5.6384e-06	9.0046e-05	0.058,0.016	0.131,0.194	-0.126
2646	ENSG00000104859.16	CLASRP	chr19	+	45069943	45070104	45070021	45070104	45069201	45069248	2646	10,2	84,79	14,20	60,54	227	149	3.50925e-05	0.00043541	0.072,0.016	0.133,0.196	-0.121
2653	ENSG00000130204.14	TOMM40	chr19	+	44891406	44891689	44891409	44891689	44891219	44891314	2653	263,56	28,2	3,6	0,0	152	149	0.00244098	0.0166714	0.902,0.965	1.0,1.0	-0.067
2655	ENSG00000130204.14	TOMM40	chr19	+	44901207	44901310	44901213	44901310	44901027	44901104	2655	543,254	1,1	14,37	0,0	155	149	1	1	0.998,0.996	1.0,1.0	-0.003
2664	ENSG00000278318.6	ZNF229	chr19	-	44442813	44443329	44442813	44443024	44447512	44447600	2664	1,2	9,10	5,1	0,2	298	149	0.016164	0.0782083	0.053,0.091	1.0,0.2	-0.528
2668	ENSG00000131115.17	ZNF227	chr19	+	44213086	44213244	44213089	44213244	44212531	44212585	2668	1,3	8,0	1,1	2,1	152	149	0.596017	1	0.109,1.0	0.329,0.495	0.142
2670	ENSG00000131115.17	ZNF227	chr19	+	44228445	44228572	44228486	44228572	44217790	44217852	2670	21,13	2,1	3,3	0,0	190	149	0.242459	0.667816	0.892,0.911	1.0,1.0	-0.099
2671	ENSG00000131115.17	ZNF227	chr19	+	44229732	44229816	44229753	44229816	44228445	44228572	2671	17,23	1,1	3,3	1,0	170	149	0.42547	0.996074	0.937,0.953	0.724,1.0	0.083
2672	ENSG00000167380.18	ZNF226	chr19	+	44165587	44165807	44165756	44165807	44165100	44165142	2672	13,16	7,0	5,0	3,1	298	149	0.0579742	0.22111	0.481,1.0	0.455,0.0	0.513
2682	ENSG00000263002.9	ZNF234	chr19	+	44156251	44158134	44156254	44158134	44150412	44150505	2682	18,20	2,0	3,8	0,2	152	149	0.574797	1	0.898,1.0	1.0,0.797	0.05
2688	ENSG00000105771.15	SMG9	chr19	-	43734388	43734588	43734388	43734495	43737596	43737682	2688	6,15	97,125	15,18	4,10	242	149	6.88338e-15	5.92786e-13	0.037,0.069	0.698,0.526	-0.559
2690	ENSG00000105771.15	SMG9	chr19	-	43747632	43747897	43747632	43747888	43747977	43748052	2690	40,26	0,1	16,20	0,1	158	149	1	1	1.0,0.961	1.0,0.95	0.005
2694	ENSG00000131116.13	ZNF428	chr19	-	43614228	43614457	43614228	43614434	43619557	43619629	2694	0,3	55,46	5,1	6,9	172	149	0.00243495	0.0166455	0.0,0.053	0.419,0.088	-0.227
2707	ENSG00000079435.11	LIPE	chr19	-	42402606	42403055	42402606	42403031	42405384	42405561	2707	1,1	19,13	0,0	2,0	173	149	1	1	0.043,0.062	0.0,NA	0.052
2718	ENSG00000079432.10	CIC	chr19	+	42292565	42292859	42292568	42292859	42292085	42292207	2718	9,4	0,0	3,1	2,0	152	149	0.558874	1	1.0,1.0	0.595,1.0	0.203
2719	ENSG00000079432.10	CIC	chr19	+	42292565	42292859	42292568	42292859	42292299	42292466	2719	139,131	40,26	60,47	6,4	152	149	0.00201078	0.0142339	0.773,0.832	0.907,0.92	-0.111
2720	ENSG00000079432.10	CIC	chr19	+	42292955	42293281	42292958	42293281	42292565	42292859	2720	34,3	23,9	4,19	4,6	152	149	0.152874	0.467913	0.592,0.246	0.495,0.756	-0.206
2721	ENSG00000079432.10	CIC	chr19	+	42293934	42294089	42293937	42294089	42293591	42293836	2721	57,25	50,34	19,10	11,12	152	149	0.494325	1	0.528,0.419	0.629,0.45	-0.066
2722	ENSG00000079432.10	CIC	chr19	+	42294574	42294735	42294603	42294735	42294172	42294304	2722	3,4	60,27	0,1	9,13	178	149	0.0406893	0.166371	0.04,0.11	0.0,0.06	0.045
2723	ENSG00000105723.13	GSK3A	chr19	-	42232056	42232170	42232056	42232149	42232495	42232682	2723	7,7	409,591	3,6	33,37	170	149	0.00017373	0.00177311	0.015,0.01	0.074,0.124	-0.087
2730	ENSG00000105723.13	GSK3A	chr19	-	42234547	42234703	42234547	42234678	42236605	42236716	2730	3,3	215,163	1,2	9,14	174	149	0.326677	0.833531	0.012,0.016	0.087,0.109	-0.084
2732	ENSG00000105404.12	RABAC1	chr19	-	41956682	41956952	41956682	41956934	41957017	41957119	2732	5,0	79,34	0,1	0,3	167	149	1	1	0.053,0.0	NA,0.229	-0.203
2738	ENSG00000241484.11	ARHGAP8	chr22	+	44859679	44859834	44859730	44859834	44848931	44849060	2738	5,2	32,18	0,1	3,6	200	149	0.0288677	0.125359	0.104,0.076	0.0,0.11	0.035
2755	ENSG00000142046.16	TMEM91	chr19	+	41383560	41384083	41383862	41384083	41382771	41382921	2755	0,0	3,0	4,2	0,0	298	149	1	1	0.0,NA	1.0,1.0	-1
2758	ENSG00000142046.16	TMEM91	chr19	+	41383714	41384083	41383862	41384083	41382771	41382921	2758	0,0	3,0	4,2	0,0	297	149	1	1	0.0,NA	1.0,1.0	-1
2778	ENSG00000077312.10	SNRPA	chr19	+	40759430	40759610	40759439	40759610	40757331	40757504	2778	342,352	6,0	44,23	0,0	158	149	0.950554	1	0.982,1.0	1.0,1.0	-0.009
2785	ENSG00000105223.22	PLD3	chr19	+	40366378	40366510	40366383	40366510	40365552	40365930	2785	1,2	0,1	0,0	0,3	154	149	1	1	1.0,0.659	NA,0.0	0.83
2786	ENSG00000105223.22	PLD3	chr19	+	40366378	40366510	40366418	40366510	40365552	40365930	2786	3,4	91,35	0,0	8,4	189	149	0.0542351	0.209152	0.025,0.083	0.0,0.0	0.054
2788	ENSG00000105223.22	PLD3	chr19	+	40366383	40366510	40366418	40366510	40365552	40365930	2788	2,3	91,35	0,3	8,4	184	149	0.473575	1	0.017,0.065	0.0,0.378	-0.148
2793	ENSG00000105221.19	AKT2	chr19	-	40236023	40236142	40236023	40236104	40236256	40236385	2793	2,5	174,138	0,1	23,15	187	149	1	1	0.009,0.028	0.0,0.05	-0.007
2794	ENSG00000105221.19	AKT2	chr19	-	40240044	40240121	40240044	40240110	40241937	40242069	2794	0,9	365,225	2,5	61,55	160	149	0.0436503	0.175786	0.0,0.036	0.03,0.078	-0.036
2795	ENSG00000105221.19	AKT2	chr19	-	40255157	40255299	40255157	40255269	40256925	40257054	2795	1,6	143,112	0,0	36,28	179	149	0.338471	0.854041	0.006,0.043	0.0,0.0	0.024
2796	ENSG00000197782.16	ZNF780A	chr19	-	40081818	40081917	40081818	40081914	40083110	40083237	2796	12,23	34,33	6,1	15,10	152	149	0.132563	0.418961	0.257,0.406	0.282,0.089	0.146
2798	ENSG00000013275.9	PSMC4	chr19	+	39972368	39972555	39972371	39972555	39972145	39972244	2798	288,178	5,0	20,17	0,1	152	149	1	1	0.983,1.0	1.0,0.943	0.02
2799	ENSG00000013275.9	PSMC4	chr19	+	39972368	39972555	39972461	39972555	39972145	39972244	2799	442,288	0,3	38,27	0,0	242	149	1	1	1.0,0.983	1.0,1.0	-0.008
2800	ENSG00000013275.9	PSMC4	chr19	+	39972371	39972555	39972461	39972555	39972145	39972244	2800	159,110	0,3	18,11	0,0	239	149	0.59029	1	1.0,0.958	1.0,1.0	-0.021
2801	ENSG00000105202.10	FBL	chr19	-	39834667	39834813	39834667	39834791	39836555	39836668	2801	1285,843	2,0	50,47	0,0	171	149	1	1	0.998,1.0	1.0,1.0	-0.001
2815	ENSG00000006712.16	PAF1	chr19	-	39389281	39389404	39389281	39389383	39389479	39389546	2815	2,0	51,82	0,0	8,14	170	149	1	1	0.033,0.0	0.0,0.0	0.017
2816	ENSG00000006712.16	PAF1	chr19	-	39389479	39389546	39389479	39389537	39389639	39389761	2816	63,83	0,0	9,30	0,2	158	149	0.299538	0.782067	1.0,1.0	1.0,0.934	0.033
2817	ENSG00000006712.16	PAF1	chr19	-	39389479	39389761	39389479	39389546	39390068	39390161	2817	289,290	0,2	47,54	0,0	298	149	1	1	1.0,0.986	1.0,1.0	-0.007
2818	ENSG00000006712.16	PAF1	chr19	-	39390068	39390289	39390068	39390161	39390817	39391154	2818	501,575	5,0	30,46	2,0	277	149	0.716557	1	0.982,1.0	0.89,1.0	0.046
2819	ENSG00000179134.17	SAMD4B	chr19	+	39354899	39355150	39355057	39355150	39354005	39354066	2819	7,5	2,3	12,9	0,0	298	149	1.79886e-05	0.000245827	0.636,0.455	1.0,1.0	-0.455
2824	ENSG00000130669.18	PAK4	chr19	+	39177623	39177809	39177674	39177809	39176589	39176715	2824	8,9	255,184	4,4	16,22	200	149	0.00754003	0.0419646	0.023,0.035	0.157,0.119	-0.109
2827	ENSG00000068903.22	SIRT2	chr19	-	38889854	38889961	38889854	38889955	38890102	38890144	2827	98,121	4,0	15,17	0,0	155	149	0.552751	1	0.959,1.0	1.0,1.0	-0.02
2828	ENSG00000068903.22	SIRT2	chr19	-	38893818	38893971	38893818	38893867	38898378	38898425	2828	2,2	7,4	1,1	2,1	253	149	0.544379	1	0.144,0.227	0.227,0.371	-0.113
2833	ENSG00000130402.15	ACTN4	chr19	+	38700926	38701121	38701001	38701121	38700599	38700714	2833	2,1	450,382	0,4	39,21	224	149	0.336312	0.850376	0.003,0.002	0.0,0.112	-0.053
2835	ENSG00000130402.15	ACTN4	chr19	+	38723936	38724077	38723945	38724077	38723613	38723722	2835	642,463	3,0	35,46	0,0	158	149	1	1	0.995,1.0	1.0,1.0	-0.002
2836	ENSG00000130402.15	ACTN4	chr19	+	38724430	38724565	38724436	38724565	38724156	38724339	2836	486,430	2,1	42,40	0,0	155	149	1	1	0.996,0.998	1.0,1.0	-0.003
2839	ENSG00000130402.15	ACTN4	chr19	+	38725723	38725903	38725726	38725903	38724430	38724565	2839	694,733	22,13	64,58	1,0	152	149	0.0365399	0.151987	0.969,0.982	0.984,1.0	-0.016
2848	ENSG00000011332.23	DPF1	chr19	-	38212267	38212391	38212267	38212361	38213643	38213756	2848	4,5	14,5	4,1	1,0	179	149	0.00024705	0.00240024	0.192,0.454	0.769,1.0	-0.562
2851	ENSG00000198182.14	ZNF607	chr19	-	37707913	37708012	37707913	37708009	37709695	37709822	2851	0,8	5,8	0,0	4,3	152	149	0.000587805	0.0050561	0.0,0.495	0.0,0.0	0.247
2853	ENSG00000181666.20	ZNF875	chr19	+	37347189	37347316	37347231	37347316	37335168	37335257	2853	5,4	0,1	5,18	0,0	191	149	1	1	1.0,0.757	1.0,1.0	-0.121
2856	ENSG00000181666.20	ZNF875	chr19	+	37362105	37364455	37362108	37364455	37347776	37347872	2856	0,3	8,12	5,1	5,13	152	149	0.187623	0.548767	0.0,0.197	0.495,0.07	-0.184
2860	ENSG00000251247.14	ZNF345	chr19	+	36851727	36851904	36851829	36851904	36850365	36850664	2860	12,0	0,1	1,0	0,0	251	149	1	1	1.0,0.0	1.0,NA	-0.5
2861	ENSG00000189042.15	ZNF567	chr19	+	36689396	36689497	36689400	36689497	36687611	36687634	2861	3,0	8,3	1,1	0,4	153	149	0.572	1	0.268,0.0	1.0,0.196	-0.464
2862	ENSG00000189042.15	ZNF567	chr19	+	36692391	36692515	36692397	36692515	36689396	36689497	2862	0,1	2,0	0,1	0,0	155	149	1	1	0.0,1.0	NA,1.0	-0.5
2866	ENSG00000225975.9	ZNF567-DT	chr19	-	36685721	36686057	36685721	36686015	36686685	36686806	2866	3,0	2,0	5,1	4,2	191	149	1	1	0.539,NA	0.494,0.281	0.152
2868	ENSG00000161298.20	ZNF382	chr19	+	36609901	36610053	36609926	36610053	36607551	36607622	2868	0,1	8,0	2,2	0,2	174	149	0.00752539	0.0419156	0.0,1.0	1.0,0.461	-0.231
2879	ENSG00000167635.13	ZNF146	chr19	+	36235658	36238764	36235661	36238764	36228747	36228819	2879	100,113	1,1	8,10	0,0	152	149	1	1	0.99,0.991	1.0,1.0	-0.01
2884	ENSG00000075702.19	WDR62	chr19	+	36066207	36066427	36066256	36066427	36065957	36066015	2884	1,0	21,14	8,13	10,6	198	149	8.14859e-09	2.50199e-07	0.035,0.0	0.376,0.62	-0.48
2886	ENSG00000075702.19	WDR62	chr19	+	36073341	36073531	36073356	36073531	36071555	36071716	2886	23,14	0,1	16,13	2,1	164	149	1	1	1.0,0.927	0.879,0.922	0.063
2888	ENSG00000075702.19	WDR62	chr19	+	36089184	36089306	36089224	36089306	36089037	36089105	2888	62,56	0,0	54,55	4,2	189	149	0.0126323	0.06355	1.0,1.0	0.914,0.956	0.065
2889	ENSG00000075702.19	WDR62	chr19	+	36099398	36099617	36099402	36099617	36097026	36097079	2889	55,34	0,0	25,35	0,1	153	149	1	1	1.0,1.0	1.0,0.971	0.014
2890	ENSG00000075702.19	WDR62	chr19	+	36100747	36100875	36100751	36100875	36099398	36099617	2890	33,21	0,2	28,6	0,0	153	149	0.637336	1	1.0,0.911	1.0,1.0	-0.044
2891	ENSG00000075702.19	WDR62	chr19	+	36101663	36102851	36102013	36102851	36101213	36101317	2891	64,38	1,0	22,29	0,0	298	149	1	1	0.97,1.0	1.0,1.0	-0.015
2892	ENSG00000075702.19	WDR62	chr19	+	36101663	36102851	36102736	36102851	36101213	36101317	2892	66,51	3,4	44,30	0,0	298	149	0.00202935	0.0143374	0.917,0.864	1.0,1.0	-0.109
2893	ENSG00000075702.19	WDR62	chr19	+	36102013	36102851	36102736	36102851	36101213	36101317	2893	3,13	3,4	32,15	0,0	298	149	6.38533e-07	1.30523e-05	0.333,0.619	1.0,1.0	-0.524
2894	ENSG00000075702.19	WDR62	chr19	+	36102446	36102851	36102736	36102851	36102013	36102151	2894	2,13	20,35	32,15	1,2	298	149	2.22045e-15	2.00723e-13	0.048,0.157	0.941,0.789	-0.762
2895	ENSG00000075702.19	WDR62	chr19	+	36102446	36102851	36102751	36102851	36102013	36102151	2895	5,18	6,7	28,16	1,0	298	149	5.28728e-07	1.10245e-05	0.294,0.562	0.933,1.0	-0.538
2896	ENSG00000075702.19	WDR62	chr19	+	36102736	36102851	36102751	36102851	36102013	36102151	2896	23,41	6,7	2,5	1,0	164	149	0.0119903	0.0609735	0.777,0.842	0.645,1.0	-0.013
2897	ENSG00000075702.19	WDR62	chr19	+	36104517	36104675	36104537	36104675	36103342	36103981	2897	46,35	1,0	33,30	0,1	169	149	1	1	0.976,1.0	1.0,0.964	0.006
2898	ENSG00000239382.12	ALKBH6	chr19	-	36010566	36010683	36010566	36010645	36010893	36011045	2898	14,20	4,3	1,2	0,0	187	149	0.000532621	0.004639	0.736,0.842	1.0,1.0	-0.211
2899	ENSG00000239382.12	ALKBH6	chr19	-	36010737	36011077	36010737	36011045	36011403	36011464	2899	6,5	16,15	2,2	3,2	181	149	0.568376	1	0.236,0.215	0.354,0.452	-0.178
2900	ENSG00000239382.12	ALKBH6	chr19	-	36010893	36011065	36010893	36011045	36011403	36011464	2900	1,0	16,15	0,0	3,2	169	149	1	1	0.052,0.0	0.0,0.0	0.026
2904	ENSG00000239382.12	ALKBH6	chr19	-	36013343	36013443	36013343	36013422	36013513	36013543	2904	0,0	2,0	2,0	0,1	170	149	1	1	0.0,NA	1.0,0.0	-0.5
2926	ENSG00000161265.15	U2AF1L4	chr19	-	35742530	35742803	35742530	35742619	35743808	35743904	2926	33,32	1,0	2,10	0,0	298	149	1	1	0.943,1.0	1.0,1.0	-0.028
2927	ENSG00000161265.15	U2AF1L4	chr19	-	35744322	35744738	35744322	35744421	35745124	35745187	2927	4,10	10,3	12,14	0,0	298	149	1.00362e-07	2.46734e-06	0.167,0.625	1.0,1.0	-0.604
2928	ENSG00000161265.15	U2AF1L4	chr19	-	35744322	35744981	35744322	35744421	35745124	35745212	2928	5,7	10,3	10,15	0,0	298	149	1.86954e-08	5.33514e-07	0.2,0.538	1.0,1.0	-0.631
2929	ENSG00000161265.15	U2AF1L4	chr19	-	35745124	35745212	35745124	35745187	35745347	35745418	2929	8,5	2,3	2,1	0,1	174	149	0.0174268	0.0831985	0.774,0.588	1.0,0.461	-0.049
2931	ENSG00000126254.13	RBM42	chr19	+	35631139	35631224	35631148	35631224	35629519	35629673	2931	166,102	13,5	17,4	0,1	158	149	0.0277002	0.12165	0.923,0.951	1.0,0.79	0.042
2932	ENSG00000126254.13	RBM42	chr19	+	35631145	35631224	35631148	35631224	35629519	35629673	2932	4,4	13,5	0,0	0,1	152	149	1	1	0.232,0.44	NA,0.0	0.336
2933	ENSG00000126254.13	RBM42	chr19	+	35633076	35633252	35633097	35633252	35631330	35631405	2933	8,2	56,7	0,2	0,2	170	149	1	1	0.111,0.2	NA,0.467	-0.311
2934	ENSG00000126254.13	RBM42	chr19	+	35633076	35633252	35633100	35633252	35631330	35631405	2934	9,2	1,4	0,2	0,0	173	149	1	1	0.886,0.301	NA,1.0	-0.406
2935	ENSG00000126254.13	RBM42	chr19	+	35633097	35633252	35633100	35633252	35631330	35631405	2935	57,7	1,4	0,2	0,0	152	149	1	1	0.982,0.632	NA,1.0	-0.193
2936	ENSG00000126254.13	RBM42	chr19	+	35633076	35633252	35633097	35633252	35632935	35633001	2936	76,17	6,0	2,3	0,0	170	149	0.0260178	0.115552	0.917,1.0	1.0,1.0	-0.041
2937	ENSG00000126254.13	RBM42	chr19	+	35633076	35633252	35633100	35633252	35632935	35633001	2937	77,17	3,0	2,3	0,0	173	149	0.610345	1	0.957,1.0	1.0,1.0	-0.022
2940	ENSG00000126254.13	RBM42	chr19	+	35637157	35637352	35637249	35637352	35634255	35634373	2940	268,177	2,0	8,17	0,0	241	149	1	1	0.988,1.0	1.0,1.0	-0.006
2943	ENSG00000249115.10	HAUS5	chr19	+	35622875	35623608	35623057	35623608	35622600	35622733	2943	240,219	2,0	128,97	0,0	298	149	1	1	0.984,1.0	1.0,1.0	-0.008
2945	ENSG00000105677.13	TMEM147	chr19	+	35546653	35546808	35546671	35546808	35546525	35546585	2945	8,6	282,198	0,0	11,10	167	149	0.0812226	0.288531	0.025,0.026	0.0,0.0	0.026
2950	ENSG00000105677.13	TMEM147	chr19	+	35546671	35547240	35547118	35547240	35546525	35546585	2950	296,212	1,0	22,26	0,0	298	149	1	1	0.993,1.0	1.0,1.0	-0.004
2954	ENSG00000236144.10	TMEM147-AS1	chr19	-	35541750	35542074	35541750	35541928	35542910	35543273	2954	57,52	2,0	20,28	1,0	295	149	0.681111	1	0.935,1.0	0.91,1.0	0.012
2983	ENSG00000105699.18	LSR	chr19	+	35266835	35266967	35266838	35266967	35266678	35266738	2983	38,22	5,2	0,2	0,0	152	149	1	1	0.882,0.915	NA,1.0	-0.101
3000	ENSG00000105220.18	GPI	chr19	+	34366302	34366435	34366344	34366435	34365195	34365388	3000	25,14	622,461	2,2	43,36	191	149	0.623364	1	0.03,0.023	0.035,0.042	-0.012
3001	ENSG00000153885.16	KCTD15	chr19	+	33798667	33798766	33798670	33798766	33796861	33796987	3001	24,12	35,28	4,6	6,2	152	149	0.191099	0.556251	0.402,0.296	0.395,0.746	-0.222
3005	ENSG00000153885.16	KCTD15	chr19	+	33811790	33815763	33812789	33815763	33811246	33811552	3005	4,1	20,16	8,7	1,2	298	149	3.50006e-08	9.34676e-07	0.091,0.03	0.8,0.636	-0.657
3014	ENSG00000131944.11	FAAP24	chr19	+	32973425	32973562	32973483	32973562	32973183	32973302	3014	9,3	5,0	1,2	0,0	207	149	0.00132224	0.0101017	0.564,1.0	1.0,1.0	-0.218
3032	ENSG00000105173.15	CCNE1	chr19	+	29820701	29820848	29820806	29820848	29817405	29817541	3032	74,70	0,1	8,6	0,0	254	149	1	1	1.0,0.976	1.0,1.0	-0.012
3034	ENSG00000105171.11	POP4	chr19	+	29610319	29610632	29610408	29610632	29608656	29608709	3034	2,9	70,96	2,1	2,4	238	149	0.354218	0.883361	0.018,0.055	0.385,0.135	-0.224
3036	ENSG00000105171.11	POP4	chr19	+	29613870	29613972	29613909	29613972	29612116	29612178	3036	110,103	1,1	6,5	0,0	188	149	1	1	0.989,0.988	1.0,1.0	-0.012
3043	ENSG00000261824.9	LINC00662	chr19	-	27721744	27726986	27721744	27723180	27732795	27732967	3043	3,11	0,2	0,2	0,0	298	149	1	1	1.0,0.733	NA,1.0	-0.133
3046	ENSG00000268362.6	ENSG00000268362	chr19	+	24049404	24049548	24049409	24049548	24046183	24046279	3046	17,34	2,4	18,16	2,3	154	149	0.874724	1	0.892,0.892	0.897,0.838	0.025
3050	ENSG00000006757.13	PNPLA4	chrX	-	7901988	7902141	7901988	7902138	7912027	7912093	3050	38,40	1,0	0,3	0,0	152	149	1	1	0.974,1.0	NA,1.0	-0.013
3054	ENSG00000015475.20	BID	chr22	-	17739348	17740176	17739348	17739488	17743802	17744013	3054	4,0	80,63	2,5	0,3	298	149	1.53886e-05	0.000217021	0.024,0.0	1.0,0.455	-0.716
3062	ENSG00000196705.9	ZNF431	chr19	+	21167567	21167666	21167570	21167666	21166334	21166461	3062	24,25	11,15	12,6	7,5	152	149	0.6648	1	0.681,0.62	0.627,0.541	0.067
3067	ENSG00000105726.18	ATP13A1	chr19	-	19645197	19645532	19645197	19645511	19645646	19645790	3067	223,146	3,5	48,48	0,0	170	149	0.169303	0.506587	0.985,0.962	1.0,1.0	-0.026
3069	ENSG00000105726.18	ATP13A1	chr19	-	19649740	19649940	19649740	19649838	19651688	19651797	3069	291,193	0,0	70,68	1,1	251	149	0.51745	1	1.0,1.0	0.977,0.976	0.024
3071	ENSG00000105726.18	ATP13A1	chr19	-	19653968	19654144	19653968	19654074	19654542	19654700	3071	296,203	49,39	46,83	55,37	219	149	1.73203e-05	0.000238036	0.804,0.78	0.363,0.604	0.309
3073	ENSG00000105726.18	ATP13A1	chr19	-	19655315	19655468	19655315	19655453	19655527	19655654	3073	2,2	175,102	2,6	50,44	164	149	0.00467129	0.0283714	0.01,0.018	0.035,0.11	-0.059
3075	ENSG00000105726.18	ATP13A1	chr19	-	19659600	19659824	19659600	19659791	19659897	19659987	3075	15,4	116,143	4,6	44,32	182	149	0.326352	0.83345	0.096,0.022	0.069,0.133	-0.042
3076	ENSG00000105717.15	PBX4	chr19	-	19569448	19569600	19569448	19569584	19570108	19570299	3076	0,0	4,1	0,2	0,4	165	149	1	1	0.0,0.0	NA,0.311	-0.311
3077	ENSG00000250067.13	YJEFN3	chr19	+	19533103	19535144	19535033	19535144	19532631	19532740	3077	10,10	0,0	33,35	1,0	298	149	1	1	1.0,1.0	0.943,1.0	0.028
3088	ENSG00000186010.20	NDUFA13	chr19	+	19526181	19526260	19526188	19526260	19516260	19516332	3088	378,396	2,0	41,63	0,2	156	149	0.835415	1	0.994,1.0	1.0,0.968	0.013
3089	ENSG00000167491.19	GATAD2A	chr19	+	19465339	19465614	19465344	19465614	19405695	19406019	3089	75,105	20,18	8,8	1,0	154	149	0.00146522	0.0110149	0.784,0.849	0.886,1.0	-0.127
3091	ENSG00000167491.19	GATAD2A	chr19	+	19465339	19465614	19465344	19465614	19427695	19427992	3091	8,8	0,2	2,1	0,0	154	149	0.851342	1	1.0,0.795	1.0,1.0	-0.103
3092	ENSG00000167491.19	GATAD2A	chr19	+	19465339	19465614	19465344	19465614	19436130	19436219	3092	7,16	4,2	1,1	0,0	154	149	0.000413731	0.00372845	0.629,0.886	1.0,1.0	-0.242
3093	ENSG00000167491.19	GATAD2A	chr19	+	19500092	19500278	19500125	19500278	19498442	19498722	3093	0,0	0,2	0,1	0,0	182	149	1	1	NA,0.0	NA,1.0	-1
3094	ENSG00000167491.19	GATAD2A	chr19	+	19501117	19501416	19501120	19501416	19498442	19498722	3094	283,205	12,6	13,24	0,0	152	149	0.0156013	0.076008	0.959,0.971	1.0,1.0	-0.035
3095	ENSG00000129933.22	MAU2	chr19	+	19342775	19342866	19342799	19342866	19342534	19342681	3095	86,66	0,0	28,31	1,0	173	149	1	1	1.0,1.0	0.96,1.0	0.02
3096	ENSG00000129933.22	MAU2	chr19	+	19344848	19345369	19345303	19345369	19343836	19343940	3096	111,54	0,0	43,30	1,0	298	149	1	1	1.0,1.0	0.956,1.0	0.022
3103	ENSG00000105705.17	SUGP1	chr19	-	19302264	19302443	19302264	19302388	19303347	19303448	3103	4,10	35,31	9,11	12,11	204	149	0.00118118	0.00918321	0.077,0.191	0.354,0.422	-0.254
3115	ENSG00000105705.17	SUGP1	chr19	-	19303723	19303910	19303723	19303847	19305848	19306076	3115	7,1	29,34	17,15	4,2	212	149	3.41949e-14	2.67566e-12	0.145,0.02	0.749,0.841	-0.712
3116	ENSG00000105705.17	SUGP1	chr19	-	19303723	19303912	19303723	19303847	19305848	19306076	3116	10,2	29,34	19,15	4,2	214	149	1.21181e-12	7.41036e-11	0.194,0.039	0.768,0.839	-0.687
3117	ENSG00000105705.17	SUGP1	chr19	-	19303723	19304043	19303723	19303847	19305848	19306076	3117	10,2	29,34	26,27	4,2	298	149	0	0	0.147,0.029	0.765,0.871	-0.73
3120	ENSG00000105705.17	SUGP1	chr19	-	19303723	19304043	19303723	19303912	19305848	19306076	3120	6,1	3,1	22,21	2,0	280	149	0.00294712	0.0194788	0.516,0.347	0.854,1.0	-0.496
3121	ENSG00000105705.17	SUGP1	chr19	-	19310096	19310236	19310096	19310200	19316421	19316593	3121	2,0	110,128	2,4	58,42	185	149	0.0534442	0.206594	0.014,0.0	0.027,0.071	-0.042
3133	ENSG00000064490.15	RFXANK	chr19	+	19196962	19197046	19196965	19197046	19193938	19194133	3133	55,41	66,48	5,14	2,14	152	149	0.358307	0.889598	0.45,0.456	0.71,0.495	-0.15
3134	ENSG00000254901.9	BORCS8	chr19	-	19176905	19177619	19176905	19177460	19180685	19180761	3134	1,6	25,17	6,4	2,0	298	149	1.47743e-05	0.000209168	0.02,0.15	0.6,1.0	-0.715
3135	ENSG00000254901.9	BORCS8	chr19	-	19186033	19186143	19186033	19186098	19186892	19187005	3135	3,1	55,48	0,1	15,24	194	149	0.456092	1	0.04,0.016	0.0,0.031	0.013
3136	ENSG00000213999.18	MEF2B	chr19	-	19146272	19146405	19146272	19146384	19146554	19146648	3136	1,0	8,1	0,0	5,0	170	149	1	1	0.099,0.0	0.0,NA	0.05
3141	ENSG00000105671.13	DDX49	chr19	+	18924214	18924308	18924232	18924308	18922603	18922744	3141	2,0	223,168	2,0	9,15	167	149	0.819482	1	0.008,0.0	0.165,0.0	-0.079
3142	ENSG00000105671.13	DDX49	chr19	+	18924852	18924979	18924881	18924979	18924622	18924699	3142	6,3	206,127	2,4	12,2	178	149	0.00204881	0.0144399	0.024,0.019	0.122,0.626	-0.352
3143	ENSG00000105662.17	CRTC1	chr19	+	18742888	18743026	18742909	18743026	18683663	18683828	3143	2,0	36,34	1,1	41,28	170	149	0.74114	1	0.046,0.0	0.021,0.03	-0.003
3144	ENSG00000105662.17	CRTC1	chr19	+	18768484	18768793	18768742	18768793	18765403	18765528	3144	55,51	2,0	33,29	0,0	298	149	0.366482	0.902805	0.932,1.0	1.0,1.0	-0.034
3148	ENSG00000221983.9	UBA52	chr19	+	18572825	18572960	18572840	18572960	18571869	18571887	3148	2,2	2,0	1,4	0,0	164	149	0.428349	0.99891	0.476,1.0	1.0,1.0	-0.262
3149	ENSG00000221983.9	UBA52	chr19	+	18573631	18573748	18573661	18573748	18573292	18573403	3149	50,44	2413,1787	2,6	59,54	179	149	0.074225	0.268457	0.017,0.02	0.027,0.085	-0.037
3159	ENSG00000105700.12	KXD1	chr19	+	18567047	18567178	18567131	18567178	18564868	18565021	3159	8,17	295,493	1,1	23,16	233	149	0.756723	1	0.017,0.022	0.027,0.038	-0.013
3160	ENSG00000105655.20	ISYNA1	chr19	-	18435562	18435676	18435562	18435664	18435756	18435921	3160	234,121	1,0	28,42	0,0	161	149	1	1	0.995,1.0	1.0,1.0	-0.002
3161	ENSG00000105655.20	ISYNA1	chr19	-	18435756	18435957	18435756	18435921	18436031	18436247	3161	9,1	137,105	0,0	19,33	185	149	0.0448774	0.17998	0.05,0.008	0.0,0.0	0.029
3162	ENSG00000105655.20	ISYNA1	chr19	-	18436329	18436479	18436329	18436470	18436683	18436877	3162	86,56	2,0	12,22	3,0	158	149	0.310715	0.803787	0.976,1.0	0.79,1.0	0.093
3163	ENSG00000105655.20	ISYNA1	chr19	-	18436683	18436901	18436683	18436877	18436972	18437105	3163	32,7	119,65	19,18	3,0	173	149	0	0	0.188,0.085	0.845,1.0	-0.786
3164	ENSG00000105655.20	ISYNA1	chr19	-	18436329	18437105	18436329	18436479	18437598	18437760	3164	82,23	10,19	19,14	0,0	298	149	3.71754e-06	6.24049e-05	0.804,0.377	1.0,1.0	-0.409
3165	ENSG00000105655.20	ISYNA1	chr19	-	18436683	18436877	18436683	18436728	18437859	18437988	3165	148,103	1,0	72,106	0,0	298	149	1	1	0.987,1.0	1.0,1.0	-0.006
3171	ENSG00000099308.14	MAST3	chr19	+	18121849	18121922	18121852	18121922	18121684	18121773	3171	12,9	4,6	6,0	1,3	152	149	0.361083	0.893439	0.746,0.595	0.855,0.0	0.243
3186	ENSG00000130475.17	FCHO1	chr19	+	17766573	17766810	17766668	17766810	17764374	17764449	3186	0,0	1,0	4,2	0,0	244	149	1	1	0.0,NA	1.0,1.0	-1
3190	ENSG00000130309.13	COLGALT1	chr19	+	17577167	17577271	17577194	17577271	17572482	17572602	3190	4,6	166,126	0,0	27,21	176	149	0.069769	0.255966	0.02,0.039	0.0,0.0	0.029
3191	ENSG00000130309.13	COLGALT1	chr19	+	17580421	17580619	17580468	17580619	17579481	17579609	3191	4,2	0,1	2,8	0,0	196	149	1	1	1.0,0.603	1.0,1.0	-0.199
3194	ENSG00000130304.18	SLC27A1	chr19	+	17487099	17487335	17487173	17487335	17486562	17486957	3194	1,0	2,0	1,0	0,0	223	149	1	1	0.25,NA	1.0,NA	-0.75
3196	ENSG00000130299.18	GTPBP3	chr19	+	17337898	17338255	17338007	17338255	17337558	17337664	3196	86,32	191,66	36,35	24,21	258	149	3.4433e-07	7.49086e-06	0.206,0.219	0.464,0.49	-0.264
3198	ENSG00000130299.18	GTPBP3	chr19	+	17341043	17341322	17341106	17341322	17339433	17339599	3198	101,30	37,6	22,29	0,4	212	149	0.00180909	0.0130473	0.657,0.778	1.0,0.836	-0.2
3199	ENSG00000074855.11	ANO8	chr19	-	17328161	17329541	17328161	17328983	17329756	17329831	3199	1,0	1,1	0,1	0,2	298	149	1	1	0.333,0.0	NA,0.2	-0.034
3202	ENSG00000105393.17	BABAM1	chr19	+	17268755	17269091	17268793	17269091	17267437	17267527	3202	41,24	68,51	7,12	4,13	187	149	0.0863449	0.302485	0.325,0.273	0.582,0.424	-0.204
3203	ENSG00000105393.17	BABAM1	chr19	+	17268760	17269091	17268793	17269091	17267437	17267527	3203	15,6	68,51	5,8	4,13	182	149	0.00376635	0.0237194	0.153,0.088	0.506,0.335	-0.3
3205	ENSG00000105393.17	BABAM1	chr19	+	17268755	17269091	17268801	17269091	17267442	17267527	3205	45,28	2,1	9,14	0,0	195	149	0.555833	1	0.945,0.955	1.0,1.0	-0.05
3206	ENSG00000105393.17	BABAM1	chr19	+	17268793	17269091	17268801	17269091	17267442	17267527	3206	72,55	2,1	6,15	0,0	157	149	0.441068	1	0.972,0.981	1.0,1.0	-0.024
3207	ENSG00000105393.17	BABAM1	chr19	+	17268755	17269091	17268793	17269091	17267444	17267516	3207	17,14	3,5	6,10	0,0	187	149	7.84052e-05	0.000881847	0.819,0.69	1.0,1.0	-0.246
3208	ENSG00000105393.17	BABAM1	chr19	+	17275743	17275825	17275776	17275825	17274106	17274185	3208	2,5	5,1	7,4	0,0	182	149	2.14466e-05	0.000285836	0.247,0.804	1.0,1.0	-0.474
3209	ENSG00000105393.17	BABAM1	chr19	+	17275743	17275825	17275788	17275825	17274106	17274185	3209	7,5	0,8	8,9	0,0	194	149	0.00119244	0.00924907	1.0,0.324	1.0,1.0	-0.338
3210	ENSG00000105393.17	BABAM1	chr19	+	17275743	17275825	17275800	17275825	17274106	17274185	3210	7,6	342,418	10,13	17,18	206	149	0	0	0.015,0.01	0.298,0.343	-0.308
3212	ENSG00000105393.17	BABAM1	chr19	+	17275776	17275825	17275788	17275825	17274106	17274185	3212	10,1	0,8	1,5	0,0	161	149	0.00417538	0.0258699	1.0,0.104	1.0,1.0	-0.448
3213	ENSG00000105393.17	BABAM1	chr19	+	17275776	17275825	17275800	17275825	17274106	17274185	3213	10,2	342,418	3,9	17,18	173	149	4.08339e-08	1.07274e-06	0.025,0.004	0.132,0.301	-0.202
3215	ENSG00000105393.17	BABAM1	chr19	+	17275788	17275825	17275800	17275825	17274106	17274185	3215	0,9	342,418	2,4	17,18	161	149	0.00105867	0.00832855	0.0,0.02	0.098,0.171	-0.125
3226	ENSG00000099331.15	MYO9B	chr19	+	17202841	17202883	17202844	17202883	17202129	17202303	3226	25,15	11,6	8,5	4,8	152	149	0.177706	0.525677	0.69,0.71	0.662,0.38	0.179
3227	ENSG00000127511.11	SIN3B	chr19	+	16841767	16841968	16841770	16841968	16831493	16831647	3227	124,171	0,2	74,63	0,0	152	149	1	1	1.0,0.988	1.0,1.0	-0.006
3228	ENSG00000127511.11	SIN3B	chr19	+	16871195	16871398	16871228	16871398	16869459	16870075	3228	0,1	69,54	1,2	23,27	182	149	0.700059	1	0.0,0.015	0.034,0.057	-0.038
3231	ENSG00000085872.16	CHERP	chr19	-	16520148	16520265	16520148	16520262	16520363	16520507	3231	242,88	1,0	20,22	2,0	152	149	0.539899	1	0.996,1.0	0.907,1.0	0.044
3232	ENSG00000085872.16	CHERP	chr19	-	16521520	16521717	16521520	16521654	16523051	16523290	3232	1,4	202,151	6,4	37,37	212	149	0.000143161	0.00149789	0.003,0.018	0.102,0.071	-0.076
3233	ENSG00000085872.16	CHERP	chr19	-	16525241	16525677	16525241	16525323	16528079	16528255	3233	203,160	10,6	41,36	1,0	298	149	0.00451638	0.0276067	0.91,0.93	0.953,1.0	-0.056
3235	ENSG00000085872.16	CHERP	chr19	-	16530768	16530913	16530768	16530880	16532597	16532749	3235	10,17	177,83	3,11	17,22	182	149	0.0159737	0.0775455	0.044,0.144	0.126,0.29	-0.114
3238	ENSG00000072958.10	AP1M1	chr19	+	16234111	16234274	16234198	16234274	16233492	16233618	3238	0,0	100,54	0,5	12,4	236	149	0.00873659	0.0473919	0.0,0.0	0.0,0.441	-0.221
3243	ENSG00000167461.13	RAB8A	chr19	+	16125442	16125547	16125469	16125547	16121749	16121810	3243	20,19	130,192	3,0	10,13	176	149	0.330067	0.839046	0.115,0.077	0.203,0.0	-0.006
3244	ENSG00000167461.13	RAB8A	chr19	+	16129553	16129604	16129573	16129604	16128025	16128091	3244	249,313	6,3	13,19	1,0	169	149	0.393487	0.946112	0.973,0.989	0.92,1.0	0.021
3266	ENSG00000267680.7	ZNF224	chr19	+	44101117	44101225	44101132	44101225	44100800	44100927	3266	0,1	14,14	0,4	8,5	164	149	0.0242619	0.109321	0.0,0.061	0.0,0.421	-0.18
3269	ENSG00000011243.20	AKAP8L	chr19	-	15397149	15397280	15397149	15397203	15397519	15397625	3269	127,128	1,0	74,72	0,0	226	149	1	1	0.988,1.0	1.0,1.0	-0.006
3270	ENSG00000011243.20	AKAP8L	chr19	-	15397149	15397320	15397149	15397203	15397519	15397625	3270	57,53	1,0	50,27	0,0	266	149	1	1	0.97,1.0	1.0,1.0	-0.015
3271	ENSG00000011243.20	AKAP8L	chr19	-	15397149	15397320	15397149	15397280	15397519	15397625	3271	8,1	78,76	4,6	28,51	189	149	0.154861	0.472854	0.075,0.01	0.101,0.085	-0.051
3273	ENSG00000011243.20	AKAP8L	chr19	-	15397713	15398766	15397713	15397855	15399301	15399410	3273	37,13	41,95	63,56	5,10	298	149	2.03171e-13	1.39479e-11	0.311,0.064	0.863,0.737	-0.613
3277	ENSG00000011243.20	AKAP8L	chr19	-	15397713	15399984	15397713	15399410	15400294	15400358	3277	15,10	13,36	44,43	12,11	298	149	4.23574e-06	6.98154e-05	0.366,0.122	0.647,0.662	-0.411
3284	ENSG00000141867.19	BRD4	chr19	-	15268153	15268281	15268153	15268240	15268904	15269042	3284	17,18	2,10	15,6	8,2	190	149	0.49925	1	0.87,0.585	0.595,0.702	0.079
3292	ENSG00000105135.17	ILVBL	chr19	-	15117880	15118015	15117880	15117972	15119165	15119302	3292	90,62	0,4	15,19	1,4	192	149	0.044857	0.179947	1.0,0.923	0.921,0.787	0.107
3293	ENSG00000105135.17	ILVBL	chr19	-	15117880	15118087	15117880	15117972	15119165	15119302	3293	15,6	0,4	17,15	1,4	264	149	0.900685	1	1.0,0.458	0.906,0.679	-0.064
3294	ENSG00000105135.17	ILVBL	chr19	-	15117880	15118087	15117880	15118015	15119165	15119302	3294	3,0	78,56	4,3	2,7	221	149	1.89518e-05	0.000257539	0.025,0.0	0.574,0.224	-0.386
3297	ENSG00000105135.17	ILVBL	chr19	-	15119417	15119542	15119417	15119515	15119981	15120081	3297	3,0	48,12	0,2	9,12	176	149	0.557075	1	0.05,0.0	0.0,0.124	-0.037
3298	ENSG00000105135.17	ILVBL	chr19	-	15119981	15120081	15119981	15120046	15122692	15122804	3298	83,44	0,0	10,6	2,0	184	149	0.814267	1	1.0,1.0	0.802,1.0	0.099
3299	ENSG00000105137.14	SYDE1	chr19	+	15110502	15110735	15110520	15110735	15109703	15110348	3299	0,0	26,7	3,0	0,1	167	149	0.0027736	0.0185084	0.0,0.0	1.0,0.0	-0.5
3300	ENSG00000105137.14	SYDE1	chr19	+	15111568	15111792	15111631	15111792	15111312	15111439	3300	3,2	64,61	5,4	8,2	212	149	1.12131e-05	0.000165512	0.032,0.023	0.305,0.584	-0.417
3302	ENSG00000182858.15	ALG12	chr22	-	49904336	49904506	49904336	49904384	49907720	49907944	3302	92,55	8,1	10,12	0,1	271	149	0.0224031	0.102597	0.863,0.968	1.0,0.868	-0.018
3304	ENSG00000099797.16	TECR	chr19	+	14563140	14563257	14563173	14563257	14562524	14562575	3304	7,2	21,23	1,1	0,1	182	149	0.00489938	0.0294043	0.214,0.066	1.0,0.45	-0.585
3306	ENSG00000099797.16	TECR	chr19	+	14563140	14563257	14563205	14563257	14562524	14562575	3306	26,18	461,325	2,1	36,30	214	149	0.213031	0.603554	0.038,0.037	0.037,0.023	0.007
3308	ENSG00000099797.16	TECR	chr19	+	14563173	14563257	14563205	14563257	14562524	14562575	3308	40,39	461,325	1,1	36,30	181	149	0.00213407	0.0148751	0.067,0.09	0.022,0.027	0.054
3309	ENSG00000099797.16	TECR	chr19	+	14563175	14563257	14563205	14563257	14562524	14562575	3309	19,16	461,325	1,0	36,30	179	149	0.0160085	0.0776366	0.033,0.039	0.023,0.0	0.025
3310	ENSG00000099797.16	TECR	chr19	+	14563528	14563702	14563657	14563702	14563205	14563257	3310	0,0	662,463	0,2	36,26	278	149	1	1	0.0,0.0	0.0,0.04	-0.02
3311	ENSG00000099797.16	TECR	chr19	+	14563770	14563903	14563799	14563903	14563657	14563702	3311	3,3	829,581	6,4	35,22	178	149	1.40937e-06	2.64329e-05	0.003,0.004	0.125,0.132	-0.125
3312	ENSG00000099797.16	TECR	chr19	+	14563770	14563903	14563834	14563903	14563657	14563702	3312	265,170	2,3	31,21	2,0	213	149	0.626783	1	0.989,0.975	0.916,1.0	0.024
3313	ENSG00000099797.16	TECR	chr19	+	14563799	14563903	14563834	14563903	14563657	14563702	3313	1091,748	2,3	60,39	2,0	184	149	0.50941	1	0.998,0.995	0.96,1.0	0.016
3314	ENSG00000099797.16	TECR	chr19	+	14565065	14565290	14565201	14565290	14564948	14564992	3314	614,343	1,0	22,22	0,0	285	149	1	1	0.997,1.0	1.0,1.0	-0.002
3315	ENSG00000123159.17	GIPC1	chr19	-	14480304	14480485	14480304	14480476	14480592	14480778	3315	93,74	1,4	6,5	1,0	158	149	0.293075	0.769654	0.989,0.946	0.85,1.0	0.042
3319	ENSG00000072062.17	PRKACA	chr19	-	14097763	14098047	14097763	14097890	14100825	14100908	3319	6,2	107,114	2,0	9,6	298	149	0.681485	1	0.027,0.009	0.1,0.0	-0.032
3322	ENSG00000289720.1	ENSG00000289720	chr20	+	34393769	34393881	34393790	34393881	34369393	34369470	3322	14,11	72,57	5,4	24,40	170	149	0.314475	0.811502	0.146,0.145	0.154,0.081	0.028
3324	ENSG00000289720.1	ENSG00000289720	chr20	+	34526267	34526343	34526271	34526343	34519419	34519498	3324	9,16	2,0	0,2	2,0	153	149	0.202602	0.58079	0.814,1.0	0.0,1.0	0.407
3325	ENSG00000132005.10	RFX1	chr19	-	13983485	13983595	13983485	13983592	13993524	13993895	3325	28,6	3,0	12,2	0,0	152	149	0.34019	0.856892	0.901,1.0	1.0,1.0	-0.049
3327	ENSG00000132024.19	CC2D1A	chr19	+	13912491	13912593	13912527	13912593	13912322	13912438	3327	0,0	22,14	3,0	12,22	185	149	0.428947	0.999237	0.0,0.0	0.168,0.0	-0.084
3329	ENSG00000132024.19	CC2D1A	chr19	+	13920556	13920668	13920559	13920668	13919817	13919939	3329	16,7	3,0	4,13	0,0	152	149	0.227976	0.635138	0.839,1.0	1.0,1.0	-0.081
3330	ENSG00000132024.19	CC2D1A	chr19	+	13920556	13920668	13920559	13920668	13919817	13919951	3330	31,16	3,8	10,8	0,1	152	149	0.00222092	0.0153847	0.91,0.662	1.0,0.887	-0.157
3331	ENSG00000132024.19	CC2D1A	chr19	+	13923317	13923455	13923332	13923455	13920749	13920922	3331	4,0	81,44	7,4	26,15	164	149	0.000134625	0.00141875	0.043,0.0	0.197,0.195	-0.175
3335	ENSG00000132024.19	CC2D1A	chr19	+	13928123	13928188	13928126	13928188	13927892	13928030	3335	51,16	5,1	6,11	4,3	152	149	0.0254544	0.113569	0.909,0.94	0.595,0.782	0.236
3336	ENSG00000132024.19	CC2D1A	chr19	+	13930356	13930878	13930374	13930878	13930241	13930289	3336	1,0	85,43	2,1	46,32	167	149	0.432439	0.999962	0.01,0.0	0.037,0.027	-0.027
3340	ENSG00000104915.16	STX10	chr19	-	13149028	13149091	13149028	13149082	13149498	13149593	3340	100,62	0,2	16,8	0,0	158	149	1	1	1.0,0.967	1.0,1.0	-0.016
3341	ENSG00000104915.16	STX10	chr19	-	13149498	13149604	13149498	13149593	13149727	13149897	3341	3,6	75,66	3,0	8,7	160	149	1	1	0.036,0.078	0.259,0.0	-0.073
3342	ENSG00000104915.16	STX10	chr19	-	13149727	13149963	13149727	13149897	13150138	13150375	3342	12,2	33,18	1,2	1,1	215	149	0.300905	0.784692	0.201,0.071	0.409,0.581	-0.359
3345	ENSG00000104907.14	TRMT1	chr19	-	13112704	13112817	13112704	13112793	13112895	13113011	3345	138,53	0,2	46,27	0,0	173	149	1	1	1.0,0.958	1.0,1.0	-0.021
3349	ENSG00000104907.14	TRMT1	chr19	-	13116145	13116431	13116145	13116340	13116652	13116740	3349	177,145	9,1	63,70	1,1	240	149	0.0763972	0.274675	0.924,0.989	0.975,0.978	-0.02
3351	ENSG00000179115.12	FARSA	chr19	-	12928341	12928384	12928341	12928381	12933681	12933709	3351	26,13	4,3	1,0	0,0	152	149	1	1	0.864,0.809	1.0,NA	-0.163
3355	ENSG00000105607.15	GCDH	chr19	+	12891486	12891974	12891830	12891974	12891270	12891395	3355	72,42	0,3	26,21	1,0	298	149	0.588268	1	1.0,0.875	0.929,1.0	-0.027
3358	ENSG00000105607.15	GCDH	chr19	+	12897302	12897428	12897329	12897428	12896909	12897013	3358	32,25	0,1	18,13	0,0	176	149	1	1	1.0,0.955	1.0,1.0	-0.022
3359	ENSG00000105607.15	GCDH	chr19	+	12897302	12897863	12897702	12897863	12896909	12897013	3359	32,23	0,0	30,15	0,2	298	149	0.758737	1	1.0,1.0	1.0,0.789	0.105
3362	ENSG00000198356.13	GET3	chr19	+	12745376	12745525	12745379	12745525	12738510	12738658	3362	109,118	0,0	7,14	1,0	152	149	1	1	1.0,1.0	0.873,1.0	0.064
3364	ENSG00000198356.13	GET3	chr19	+	12747394	12747592	12747400	12747592	12747196	12747304	3364	273,216	2,0	15,9	0,0	155	149	1	1	0.992,1.0	1.0,1.0	-0.004
3366	ENSG00000198356.13	GET3	chr19	+	12747397	12747592	12747400	12747592	12747196	12747304	3366	6,6	2,0	0,1	0,0	152	149	1	1	0.746,1.0	NA,1.0	-0.127
3369	ENSG00000105583.12	WDR83OS	chr19	-	12668519	12668617	12668519	12668611	12669127	12669233	3369	569,211	2,0	20,24	0,0	155	149	1	1	0.996,1.0	1.0,1.0	-0.002
3370	ENSG00000123154.13	WDR83	chr19	+	12670518	12670611	12670562	12670611	12670179	12670285	3370	2,1	27,29	1,1	6,0	193	149	0.871948	1	0.054,0.026	0.114,1.0	-0.517
3371	ENSG00000123154.13	WDR83	chr19	+	12670518	12670611	12670565	12670611	12670179	12670285	3371	2,1	0,1	1,1	0,2	196	149	0.309729	0.801877	1.0,0.432	1.0,0.275	0.079
3372	ENSG00000123154.13	WDR83	chr19	+	12670562	12670611	12670565	12670611	12670179	12670285	3372	27,29	0,1	6,0	0,2	152	149	0.0791804	0.283143	1.0,0.966	1.0,0.0	0.483
3373	ENSG00000123154.13	WDR83	chr19	+	12670694	12670821	12670710	12670821	12670562	12670611	3373	31,14	1,0	3,1	0,0	165	149	1	1	0.966,1.0	1.0,1.0	-0.017
3376	ENSG00000104774.15	MAN2B1	chr19	-	12652362	12652460	12652362	12652429	12655693	12655879	3376	122,73	2,0	11,12	3,3	180	149	0.000103243	0.00112171	0.981,1.0	0.752,0.768	0.23
3377	ENSG00000104774.15	MAN2B1	chr19	-	12655693	12655879	12655693	12655862	12656570	12656687	3377	120,66	2,0	7,9	0,0	166	149	1	1	0.982,1.0	1.0,1.0	-0.009
3378	ENSG00000104774.15	MAN2B1	chr19	-	12656570	12656687	12656570	12656681	12656948	12657056	3378	72,78	0,1	6,17	0,0	155	149	1	1	1.0,0.987	1.0,1.0	-0.006
3379	ENSG00000104774.15	MAN2B1	chr19	-	12656948	12657056	12656948	12656990	12657445	12657555	3379	150,100	1,4	11,29	0,0	215	149	0.400137	0.95704	0.99,0.945	1.0,1.0	-0.032
3382	ENSG00000104774.15	MAN2B1	chr19	-	12658427	12658513	12658427	12658510	12661259	12661376	3382	16,18	131,149	0,0	8,4	152	149	0.000912611	0.00737487	0.107,0.106	0.0,0.0	0.106
3384	ENSG00000104774.15	MAN2B1	chr19	-	12665702	12665832	12665702	12665805	12666542	12666736	3384	1,0	72,33	0,3	12,8	176	149	0.215692	0.608605	0.012,0.0	0.0,0.241	-0.114
3386	ENSG00000197647.14	ZNF433	chr19	-	12018165	12018301	12018165	12018292	12030139	12030198	3386	0,1	2,0	0,2	0,0	158	149	1	1	0.0,1.0	NA,1.0	-0.5
3387	ENSG00000197647.14	ZNF433	chr19	-	12018165	12018380	12018165	12018292	12034827	12034874	3387	1,6	0,1	2,8	0,0	237	149	1	1	1.0,0.79	1.0,1.0	-0.105
3394	ENSG00000130175.11	PRKCSH	chr19	+	11436040	11436196	11436071	11436196	11435647	11435706	3394	435,365	2,1	32,58	0,0	180	149	1	1	0.994,0.997	1.0,1.0	-0.004
3395	ENSG00000130175.11	PRKCSH	chr19	+	11446247	11446350	11446271	11446350	11445388	11445473	3395	9,0	352,300	4,1	21,38	173	149	0.050826	0.19837	0.022,0.0	0.141,0.022	-0.07
3396	ENSG00000130175.11	PRKCSH	chr19	+	11447692	11447789	11447695	11447789	11447438	11447597	3396	40,40	3,2	1,10	0,0	152	149	0.0464995	0.184968	0.929,0.951	1.0,1.0	-0.06
3400	ENSG00000130175.11	PRKCSH	chr19	+	11447692	11447789	11447722	11447789	11447438	11447618	3400	200,84	71,51	18,15	3,11	179	149	0.691193	1	0.701,0.578	0.833,0.532	-0.043
3401	ENSG00000130175.11	PRKCSH	chr19	+	11447695	11447789	11447722	11447789	11447438	11447618	3401	117,53	71,51	14,7	3,11	176	149	0.743009	1	0.582,0.468	0.798,0.35	-0.049
3402	ENSG00000130175.11	PRKCSH	chr19	+	11448221	11448291	11448229	11448291	11447438	11447618	3402	78,30	2,0	7,6	0,0	157	149	1	1	0.974,1.0	1.0,1.0	-0.013
3404	ENSG00000105520.12	PLPPR2	chr19	+	11357618	11357739	11357659	11357739	11356801	11356976	3404	1,1	24,14	0,0	2,3	190	149	0.350562	0.876195	0.032,0.053	0.0,0.0	0.042
3405	ENSG00000105520.12	PLPPR2	chr19	+	11359531	11359720	11359606	11359720	11357659	11357739	3405	34,22	1,2	2,2	0,3	224	149	0.245755	0.674215	0.958,0.88	1.0,0.307	0.266
3408	ENSG00000197256.12	KANK2	chr19	-	11178344	11178471	11178344	11178447	11178552	11178720	3408	1,2	24,10	0,0	1,1	173	149	0.468115	1	0.035,0.147	0.0,0.0	0.091
3410	ENSG00000130164.17	LDLR	chr19	+	11120369	11120522	11120372	11120522	11120091	11120233	3410	117,109	5,0	38,34	0,0	152	149	0.854607	1	0.958,1.0	1.0,1.0	-0.021
3411	ENSG00000130164.17	LDLR	chr19	+	11129450	11129670	11129512	11129670	11128007	11128085	3411	1,0	169,103	6,12	20,26	211	149	1.10367e-12	6.77757e-11	0.004,0.0	0.175,0.246	-0.208
3412	ENSG00000130733.12	YIPF2	chr19	-	10922216	10923174	10922216	10923129	10923271	10923407	3412	153,88	5,4	6,6	1,0	194	149	0.097112	0.332013	0.959,0.944	0.822,1.0	0.04
3413	ENSG00000130733.12	YIPF2	chr19	-	10922769	10923191	10922769	10923174	10923271	10923407	3413	22,13	122,82	3,2	6,4	166	149	0.328831	0.837283	0.139,0.125	0.31,0.31	-0.178
3414	ENSG00000130733.12	YIPF2	chr19	-	10923271	10923407	10923271	10923392	10923494	10923677	3414	171,95	1,0	12,17	0,0	164	149	1	1	0.994,1.0	1.0,1.0	-0.003
3417	ENSG00000130733.12	YIPF2	chr19	-	10927798	10927959	10927798	10927920	10928379	10928440	3417	133,115	0,0	9,16	0,2	188	149	0.596673	1	1.0,1.0	1.0,0.864	0.068
3429	ENSG00000129347.22	KRI1	chr19	-	10557551	10557685	10557551	10557682	10557768	10557895	3429	1,1	91,47	0,2	13,20	152	149	0.437973	1	0.011,0.02	0.0,0.089	-0.029
3430	ENSG00000129347.22	KRI1	chr19	-	10560311	10560472	10560311	10560448	10561002	10561080	3430	0,0	22,38	2,0	37,24	173	149	0.433154	0.999962	0.0,0.0	0.044,0.0	-0.022
3431	ENSG00000129347.22	KRI1	chr19	-	10562728	10562837	10562728	10562821	10564928	10565034	3431	19,36	1,0	34,28	0,0	165	149	1	1	0.945,1.0	1.0,1.0	-0.028
3432	ENSG00000130734.11	ATG4D	chr19	+	10544708	10544866	10544782	10544866	10543894	10544325	3432	7,8	32,24	3,0	6,8	223	149	0.246067	0.674818	0.128,0.182	0.25,0.0	0.03
3433	ENSG00000130734.11	ATG4D	chr19	+	10546838	10547253	10547115	10547253	10544956	10545130	3433	33,8	0,1	7,7	0,0	298	149	1	1	1.0,0.8	1.0,1.0	-0.1
3434	ENSG00000130734.11	ATG4D	chr19	+	10546838	10547253	10547188	10547253	10544956	10545130	3434	33,9	3,2	6,10	0,0	298	149	0.00157946	0.0116688	0.846,0.692	1.0,1.0	-0.231
3435	ENSG00000130734.11	ATG4D	chr19	+	10547115	10547253	10547188	10547253	10544956	10545130	3435	7,5	3,2	3,4	0,0	222	149	0.000200148	0.00199928	0.61,0.627	1.0,1.0	-0.381
3445	ENSG00000105401.11	CDC37	chr19	-	10395227	10395367	10395227	10395343	10395434	10395543	3445	5,9	227,264	14,16	10,12	173	149	0	0	0.019,0.029	0.547,0.535	-0.517
3447	ENSG00000105401.11	CDC37	chr19	-	10395434	10395696	10395434	10395543	10395927	10396203	3447	39,33	189,290	4,9	49,68	298	149	0.188544	0.550797	0.094,0.054	0.039,0.062	0.023
3450	ENSG00000105397.17	TYK2	chr19	-	10351051	10351484	10351051	10351162	10352433	10352551	3450	3,12	44,38	11,7	14,17	298	149	0.0096094	0.0509897	0.033,0.136	0.282,0.171	-0.142
3453	ENSG00000105397.17	TYK2	chr19	-	10352925	10353180	10352925	10353098	10353527	10353646	3453	8,1	87,50	15,10	12,16	231	149	3.98665e-09	1.31271e-07	0.056,0.013	0.446,0.287	-0.332
3454	ENSG00000105397.17	TYK2	chr19	-	10352925	10353098	10352925	10353074	10354041	10354234	3454	6,2	2,0	2,4	0,0	173	149	0.770217	1	0.721,1.0	1.0,1.0	-0.139
3455	ENSG00000105397.17	TYK2	chr19	-	10356567	10357918	10356567	10356718	10358002	10358138	3455	81,51	0,0	41,49	0,1	298	149	1	1	1.0,1.0	1.0,0.961	0.02
3456	ENSG00000105397.17	TYK2	chr19	-	10361769	10361955	10361769	10361836	10362077	10362181	3456	102,53	7,2	47,59	1,7	268	149	0.820552	1	0.89,0.936	0.963,0.824	0.02
3458	ENSG00000105397.17	TYK2	chr19	-	10379614	10379779	10379614	10379689	10380379	10380572	3458	37,43	2,0	37,41	0,0	239	149	0.477897	1	0.92,1.0	1.0,1.0	-0.04
3462	ENSG00000161847.16	RAVER1	chr19	-	10321530	10321618	10321530	10321615	10322644	10322739	3462	294,55	4,0	19,23	2,0	152	149	0.582405	1	0.986,1.0	0.903,1.0	0.041
3467	ENSG00000105364.15	MRPL4	chr19	+	10258221	10258328	10258224	10258328	10256707	10256825	3467	508,281	8,12	18,8	0,0	152	149	0.0532694	0.206083	0.984,0.958	1.0,1.0	-0.029
3471	ENSG00000130816.18	DNMT1	chr19	-	10133369	10134307	10133369	10133701	10135735	10135852	3471	268,108	4,0	49,69	3,0	298	149	0.686775	1	0.971,1.0	0.891,1.0	0.04
3472	ENSG00000130816.18	DNMT1	chr19	-	10139675	10139849	10139675	10139817	10140045	10140328	3472	2,0	242,173	1,5	22,16	181	149	0.00205821	0.0144851	0.007,0.0	0.036,0.205	-0.117
3473	ENSG00000130816.18	DNMT1	chr19	-	10139675	10140328	10139675	10139817	10140780	10140909	3473	295,166	1,0	81,96	0,0	298	149	1	1	0.993,1.0	1.0,1.0	-0.004
3474	ENSG00000130816.18	DNMT1	chr19	-	10140045	10140328	10140045	10140247	10140780	10140909	3474	492,287	3,0	98,79	0,0	230	149	1	1	0.991,1.0	1.0,1.0	-0.004
3475	ENSG00000130816.18	DNMT1	chr19	-	10160017	10160418	10160017	10160063	10162666	10162748	3475	17,46	0,0	43,26	0,1	298	149	1	1	1.0,1.0	1.0,0.929	0.035
3476	ENSG00000130816.18	DNMT1	chr19	-	10180349	10180529	10180349	10180515	10180777	10180885	3476	36,44	0,0	16,18	0,2	163	149	0.564142	1	1.0,1.0	1.0,0.892	0.054
3477	ENSG00000130816.18	DNMT1	chr19	-	10180349	10180569	10180349	10180515	10180777	10180885	3477	382,421	0,0	104,126	0,2	203	149	1	1	1.0,1.0	1.0,0.979	0.01
3478	ENSG00000130816.18	DNMT1	chr19	-	10180349	10180569	10180349	10180529	10180777	10180885	3478	351,380	5,3	94,114	6,6	189	149	0.000742905	0.00618195	0.982,0.99	0.925,0.937	0.055
3479	ENSG00000130816.18	DNMT1	chr19	-	10180777	10180885	10180777	10180836	10182040	10182077	3479	505,421	0,2	117,109	0,0	198	149	1	1	1.0,0.994	1.0,1.0	-0.003
3496	ENSG00000198258.12	UBL5	chr19	+	9828326	9828675	9828591	9828675	9827917	9827984	3496	179,151	0,1	7,3	0,0	298	149	1	1	1.0,0.987	1.0,1.0	-0.006
3499	ENSG00000171469.12	ZNF561	chr19	-	9617044	9617226	9617044	9617171	9618090	9618179	3499	13,7	61,45	5,5	0,4	204	149	0.000502595	0.00439854	0.135,0.102	1.0,0.477	-0.62
3500	ENSG00000171469.12	ZNF561	chr19	-	9617620	9617768	9617620	9617758	9618090	9618179	3500	8,7	6,11	3,8	0,2	159	149	0.00170732	0.0124428	0.555,0.374	1.0,0.789	-0.43
3501	ENSG00000171469.12	ZNF561	chr19	-	9618090	9618179	9618090	9618166	9619431	9619582	3501	55,68	8,5	10,11	0,0	162	149	0.000931769	0.00749224	0.863,0.926	1.0,1.0	-0.105
3503	ENSG00000171469.12	ZNF561	chr19	-	9620915	9621049	9620915	9620963	9621161	9621205	3503	10,3	0,1	3,5	0,0	235	149	1	1	1.0,0.655	1.0,1.0	-0.172
3505	ENSG00000130818.13	ZNF426	chr19	-	9533839	9533966	9533839	9533924	9535187	9535279	3505	39,41	0,0	4,8	1,1	191	149	0.326422	0.833465	1.0,1.0	0.757,0.862	0.191
3507	ENSG00000130818.13	ZNF426	chr19	-	9538258	9538345	9538258	9538300	9538574	9538645	3507	24,21	0,0	1,8	0,1	194	149	1	1	1.0,1.0	1.0,0.86	0.07
3508	ENSG00000188629.15	ZNF177	chr19	+	9380667	9382617	9382384	9382617	9380056	9380139	3508	5,8	0,2	4,11	0,0	298	149	0.656817	1	1.0,0.667	1.0,1.0	-0.166
3509	ENSG00000130803.16	ZNF317	chr19	+	9157833	9158075	9157979	9158075	9157267	9157394	3509	6,3	42,34	3,15	6,2	295	149	0.000893525	0.00723268	0.067,0.043	0.202,0.791	-0.442
3510	ENSG00000126453.12	BCL2L12	chr19	+	49667018	49667161	49667021	49667161	49665823	49666799	3510	90,49	7,0	6,5	0,1	152	149	0.112308	0.367641	0.926,1.0	1.0,0.831	0.048
3511	ENSG00000126453.12	BCL2L12	chr19	+	49666976	49667161	49667018	49667161	49666684	49666799	3511	2,3	85,49	4,1	5,5	191	149	0.00913834	0.0490773	0.018,0.046	0.384,0.135	-0.228
3512	ENSG00000126453.12	BCL2L12	chr19	+	49666976	49667161	49667021	49667161	49666684	49666799	3512	7,3	7,0	5,1	0,1	194	149	0.0163885	0.0790321	0.434,1.0	1.0,0.434	0
3513	ENSG00000126453.12	BCL2L12	chr19	+	49669023	49669115	49669047	49669115	49668850	49668937	3513	137,81	2,1	6,14	0,0	173	149	0.721599	1	0.983,0.986	1.0,1.0	-0.016
3539	ENSG00000167775.12	CD320	chr19	-	8303854	8303956	8303854	8303953	8305030	8305156	3539	1,0	2,0	3,0	0,0	152	149	1	1	0.329,NA	1.0,NA	-0.671
3540	ENSG00000167775.12	CD320	chr19	-	8303854	8303973	8303854	8303953	8305030	8305156	3540	23,14	2,0	5,0	0,0	169	149	1	1	0.91,1.0	1.0,NA	-0.045
3541	ENSG00000167775.12	CD320	chr19	-	8303854	8304088	8303854	8303953	8305030	8305156	3541	365,201	2,0	20,1	0,0	284	149	1	1	0.99,1.0	1.0,1.0	-0.005
3544	ENSG00000167775.12	CD320	chr19	-	8303854	8304088	8303854	8303973	8305030	8305156	3544	345,188	3,1	16,1	1,0	264	149	1	1	0.985,0.991	0.9,1.0	0.038
3545	ENSG00000167775.12	CD320	chr19	-	8305030	8305180	8305030	8305156	8308148	8308310	3545	6,2	92,36	0,0	7,0	173	149	1	1	0.053,0.046	0.0,NA	0.05
3546	ENSG00000167775.12	CD320	chr19	-	8303854	8303956	8303854	8303953	8308148	8308327	3546	1,0	0,1	3,0	0,0	152	149	1	1	1.0,0.0	1.0,NA	-0.5
3547	ENSG00000167775.12	CD320	chr19	-	8305030	8305201	8305030	8305156	8308148	8308358	3547	6,2	92,36	1,0	7,0	194	149	1	1	0.048,0.041	0.099,NA	-0.055
3550	ENSG00000090661.14	CERS4	chr19	+	8251043	8251249	8251075	8251249	8209369	8209494	3550	0,0	2,0	3,0	0,0	181	149	1	1	0.0,NA	1.0,NA	-1
3559	ENSG00000090661.14	CERS4	chr19	+	8250772	8251249	8251043	8251249	8210705	8210862	3559	0,0	4,0	2,0	0,0	298	149	1	1	0.0,NA	1.0,NA	-1
3565	ENSG00000090661.14	CERS4	chr19	+	8251043	8251249	8251075	8251249	8241340	8241457	3565	0,0	2,0	3,0	0,0	181	149	1	1	0.0,NA	1.0,NA	-1
3571	ENSG00000090661.14	CERS4	chr19	+	8255803	8255879	8255821	8255879	8255606	8255725	3571	0,0	4,4	0,3	2,0	167	149	0.0289601	0.125653	0.0,0.0	0.0,1.0	-0.5
3575	ENSG00000076984.19	MAP2K7	chr19	+	7910062	7910373	7910259	7910373	7909754	7909896	3575	49,24	4,0	12,14	0,0	298	149	0.0610029	0.230427	0.86,1.0	1.0,1.0	-0.07
3576	ENSG00000076984.19	MAP2K7	chr19	+	7911414	7911578	7911435	7911578	7911249	7911330	3576	6,0	83,45	3,1	7,18	170	149	0.25405	0.690922	0.06,0.0	0.273,0.046	-0.13
3583	ENSG00000196562.17	SULF2	chr20	-	47665856	47665956	47665856	47665953	47666259	47666488	3583	2,10	65,65	1,2	8,10	152	149	0.385016	0.932863	0.029,0.131	0.109,0.164	-0.057
3584	ENSG00000076944.18	STXBP2	chr19	+	7640697	7640809	7640730	7640809	7639730	7639807	3584	3,0	19,18	0,2	4,6	182	149	0.624741	1	0.114,0.0	0.0,0.214	-0.05
3587	ENSG00000076944.18	STXBP2	chr19	+	7644581	7644752	7644613	7644752	7643164	7643245	3587	0,0	28,33	2,1	1,3	181	149	0.0332659	0.140701	0.0,0.0	0.622,0.215	-0.418
3588	ENSG00000076944.18	STXBP2	chr19	+	7646171	7646344	7646248	7646344	7645196	7645306	3588	4,1	23,10	1,0	3,9	226	149	0.0464804	0.184968	0.103,0.062	0.18,0.0	-0.008
3590	ENSG00000229833.12	PET100	chr19	+	7630753	7630846	7630822	7630846	7630572	7630659	3590	1,1	117,108	0,1	13,11	218	149	1	1	0.006,0.006	0.0,0.059	-0.024
3591	ENSG00000229833.12	PET100	chr19	+	7630783	7630846	7630822	7630846	7630572	7630659	3591	1,1	117,108	0,1	13,11	188	149	1	1	0.007,0.007	0.0,0.067	-0.027
3594	ENSG00000076924.13	XAB2	chr19	-	7622529	7622661	7622529	7622658	7622761	7622893	3594	94,74	0,1	14,26	0,0	152	149	1	1	1.0,0.986	1.0,1.0	-0.007
3599	ENSG00000090674.17	MCOLN1	chr19	+	7527695	7527960	7527863	7527960	7527519	7527628	3599	3,3	61,53	10,16	1,2	298	149	0	0	0.024,0.028	0.833,0.8	-0.79
3600	ENSG00000090674.17	MCOLN1	chr19	+	7530285	7530501	7530369	7530501	7529589	7529712	3600	70,91	4,0	28,18	0,0	233	149	0.469267	1	0.918,1.0	1.0,1.0	-0.041
3601	ENSG00000090674.17	MCOLN1	chr19	+	7530285	7530501	7530434	7530501	7529589	7529712	3601	92,118	3,0	37,20	0,0	298	149	0.432591	0.999962	0.939,1.0	1.0,1.0	-0.03
3602	ENSG00000090674.17	MCOLN1	chr19	+	7530369	7530501	7530434	7530501	7529589	7529712	3602	27,27	3,0	9,3	0,0	214	149	0.38862	0.938604	0.862,1.0	1.0,1.0	-0.069
3604	ENSG00000130544.13	ZNF557	chr19	+	7075654	7075743	7075675	7075743	7074995	7075105	3604	4,17	4,13	9,3	0,3	170	149	0.0694541	0.255004	0.467,0.534	1.0,0.467	-0.233
3609	ENSG00000125731.14	SH2D3A	chr19	-	6754830	6755312	6754830	6754932	6759593	6759670	3609	0,2	1,1	0,1	0,0	298	149	1	1	0.0,0.5	NA,1.0	-0.75
3610	ENSG00000125731.14	SH2D3A	chr19	-	6754830	6755315	6754830	6754932	6759593	6759670	3610	2,4	1,1	0,1	0,0	298	149	1	1	0.5,0.667	NA,1.0	-0.416
3614	ENSG00000125734.17	GPR108	chr19	-	6730986	6731054	6730986	6731027	6731198	6731282	3614	29,28	0,3	0,3	0,0	176	149	1	1	1.0,0.888	NA,1.0	-0.056
3615	ENSG00000125734.17	GPR108	chr19	-	6730986	6731060	6730986	6731027	6731198	6731282	3615	33,35	0,3	1,3	0,0	182	149	0.747406	1	1.0,0.905	1.0,1.0	-0.047
3616	ENSG00000125734.17	GPR108	chr19	-	6730986	6731111	6730986	6731027	6731198	6731282	3616	99,76	0,3	5,10	0,0	233	149	0.436828	1	1.0,0.942	1.0,1.0	-0.029
3619	ENSG00000125734.17	GPR108	chr19	-	6730986	6731111	6730986	6731060	6731198	6731282	3619	66,45	0,4	4,7	0,0	200	149	0.273141	0.729927	1.0,0.893	1.0,1.0	-0.053
3620	ENSG00000125734.17	GPR108	chr19	-	6731198	6731282	6731198	6731234	6731472	6731522	3620	76,51	0,1	8,13	0,0	197	149	1	1	1.0,0.975	1.0,1.0	-0.012
3621	ENSG00000125734.17	GPR108	chr19	-	6731198	6731314	6731198	6731234	6731472	6731522	3621	24,19	0,1	1,2	0,0	229	149	1	1	1.0,0.925	1.0,1.0	-0.037
3622	ENSG00000125734.17	GPR108	chr19	-	6731198	6731314	6731198	6731282	6731472	6731522	3622	4,4	56,36	0,0	7,11	181	149	0.0105213	0.0548447	0.056,0.084	0.0,0.0	0.07
3634	ENSG00000031823.15	RANBP3	chr19	-	5921200	5921321	5921200	5921315	5923193	5923303	3634	125,144	4,0	29,25	0,0	155	149	0.651541	1	0.968,1.0	1.0,1.0	-0.016
3635	ENSG00000031823.15	RANBP3	chr19	-	5927967	5928087	5927967	5928084	5931403	5931531	3635	140,119	0,0	19,21	1,0	152	149	1	1	1.0,1.0	0.949,1.0	0.026
3636	ENSG00000031823.15	RANBP3	chr19	-	5933413	5933656	5933413	5933479	5941620	5941707	3636	6,1	83,62	9,19	0,5	298	149	1.63203e-14	1.34195e-12	0.035,0.008	1.0,0.655	-0.806
3637	ENSG00000031823.15	RANBP3	chr19	-	5950716	5950875	5950716	5950872	5951392	5951596	3637	0,0	7,0	1,2	0,0	152	149	1	1	0.0,NA	1.0,1.0	-1
3645	ENSG00000174886.16	NDUFA11	chr19	-	5896452	5896650	5896452	5896575	5896904	5896997	3645	36,31	1459,995	8,5	59,42	224	149	0.000501045	0.00438761	0.016,0.02	0.083,0.073	-0.06
3649	ENSG00000141994.17	DUS3L	chr19	-	5785602	5785830	5785602	5785791	5786466	5786542	3649	1,0	123,89	6,6	23,16	188	149	1.75579e-08	5.06016e-07	0.006,0.0	0.171,0.229	-0.197
3655	ENSG00000141994.17	DUS3L	chr19	-	5786748	5786919	5786748	5786845	5787060	5787171	3655	28,23	114,46	37,28	8,11	223	149	4.13014e-12	2.41406e-10	0.141,0.25	0.756,0.63	-0.498
3664	ENSG00000160633.14	SAFB	chr19	+	5661517	5661808	5661520	5661808	5657240	5657347	3664	95,59	71,69	14,10	4,9	152	149	0.204737	0.58528	0.567,0.456	0.774,0.521	-0.136
3668	ENSG00000160633.14	SAFB	chr19	+	5667346	5667450	5667352	5667450	5667045	5667164	3668	67,66	13,16	5,8	2,2	155	149	0.643271	1	0.832,0.799	0.706,0.794	0.066
3669	ENSG00000130254.14	SAFB2	chr19	-	5593890	5594196	5593890	5594178	5595360	5595497	3669	0,0	7,8	1,2	2,12	167	149	0.152687	0.467635	0.0,0.0	0.308,0.129	-0.218
3672	ENSG00000127663.17	KDM4B	chr19	+	5150330	5150450	5150357	5150450	5144782	5144902	3672	2,0	26,14	0,1	2,3	176	149	0.405169	0.964954	0.061,0.0	0.0,0.22	-0.08
3708	ENSG00000167674.16	HDGFL2	chr19	+	4493702	4493862	4493705	4493862	4491763	4491835	3708	67,49	5,2	16,9	0,1	152	149	0.0508119	0.198368	0.929,0.96	1.0,0.898	-0.005
3709	ENSG00000167674.16	HDGFL2	chr19	+	4494165	4494475	4494192	4494475	4493981	4494057	3709	67,71	1,0	23,11	0,0	176	149	1	1	0.983,1.0	1.0,1.0	-0.008
3711	ENSG00000167674.16	HDGFL2	chr19	+	4496918	4498031	4497957	4498031	4496301	4496405	3711	1,0	35,24	1,7	3,4	298	149	1.32169e-05	0.000189227	0.014,0.0	0.143,0.467	-0.298
3712	ENSG00000167674.16	HDGFL2	chr19	+	4498251	4498376	4498305	4498376	4497957	4498031	3712	2,1	36,23	0,3	2,7	203	149	0.447853	1	0.039,0.031	0.0,0.239	-0.084
3714	ENSG00000167674.16	HDGFL2	chr19	+	4501910	4502207	4501913	4502207	4501190	4501317	3714	38,61	12,7	3,8	0,0	152	149	0.000308903	0.00292123	0.756,0.895	1.0,1.0	-0.174
3715	ENSG00000167671.13	UBXN6	chr19	-	4447549	4447727	4447549	4447625	4448317	4448415	3715	0,0	74,54	3,1	10,2	251	149	0.0241028	0.108874	0.0,0.0	0.151,0.229	-0.19
3717	ENSG00000167670.17	CHAF1A	chr19	+	4417998	4418076	4418019	4418076	4408902	4409759	3717	1,4	55,60	2,6	17,23	170	149	0.0150088	0.0734245	0.016,0.055	0.093,0.186	-0.104
3719	ENSG00000167670.17	CHAF1A	chr19	+	4423289	4423395	4423334	4423395	4422565	4422795	3719	0,0	2,4	0,1	8,6	194	149	1	1	0.0,0.0	0.0,0.113	-0.057
3720	ENSG00000167670.17	CHAF1A	chr19	+	4429707	4429788	4429710	4429788	4429437	4429606	3720	130,118	11,7	52,45	2,2	152	149	0.125327	0.401677	0.921,0.943	0.962,0.957	-0.028
3725	ENSG00000008382.17	MPND	chr19	+	4357950	4358172	4358082	4358172	4357514	4357585	3725	0,0	32,19	7,4	9,5	281	149	7.68067e-08	1.924e-06	0.0,0.0	0.292,0.298	-0.295
3738	ENSG00000167658.17	EEF2	chr19	-	3976055	3976771	3976055	3976747	3977214	3977347	3738	36,15	7322,3335	8,8	178,177	173	149	0.000319129	0.00299677	0.004,0.004	0.037,0.037	-0.033
3739	ENSG00000167658.17	EEF2	chr19	-	3977214	3977347	3977214	3977335	3977427	3977610	3739	6523,3475	8,6	122,154	0,1	161	149	1	1	0.999,0.998	1.0,0.993	0.002
3740	ENSG00000167658.17	EEF2	chr19	-	3977818	3978103	3977818	3978007	3979328	3979436	3740	4174,2334	3,0	164,176	0,1	245	149	1	1	0.999,1.0	1.0,0.991	0.004
3741	ENSG00000167658.17	EEF2	chr19	-	3977818	3978172	3977818	3978007	3979328	3979436	3741	11307,7285	3,0	365,370	0,1	298	149	1	1	0.999,1.0	1.0,0.995	0.002
3742	ENSG00000167658.17	EEF2	chr19	-	3977818	3978202	3977818	3978007	3979328	3979436	3742	5687,3161	3,0	216,219	0,1	298	149	1	1	0.999,1.0	1.0,0.991	0.004
3743	ENSG00000167658.17	EEF2	chr19	-	3977818	3978172	3977818	3978103	3979328	3979436	3743	7358,5131	6,0	223,201	0,1	218	149	1	1	0.999,1.0	1.0,0.993	0.003
3744	ENSG00000167658.17	EEF2	chr19	-	3977818	3978202	3977818	3978103	3979328	3979436	3744	1915,1120	6,0	93,73	0,1	248	149	1	1	0.995,1.0	1.0,0.978	0.009
3745	ENSG00000167658.17	EEF2	chr19	-	3977818	3978202	3977818	3978172	3979328	3979436	3745	183,113	5624,4124	19,23	149,151	179	149	3.52619e-11	1.73967e-09	0.026,0.022	0.096,0.113	-0.081
3746	ENSG00000167658.17	EEF2	chr19	-	3979807	3980117	3979807	3980066	3980513	3980709	3746	52,67	5675,4903	21,33	141,130	200	149	0	0	0.007,0.01	0.1,0.159	-0.121
3747	ENSG00000167658.17	EEF2	chr19	-	3981338	3981452	3981338	3981425	3981946	3982052	3747	6255,8273	4,0	232,163	0,0	176	149	1	1	0.999,1.0	1.0,1.0	0
3755	ENSG00000186111.12	PIP5K1C	chr19	-	3656404	3656659	3656404	3656557	3660965	3661083	3755	3,4	50,53	5,6	17,4	251	149	0.000930967	0.00749224	0.034,0.043	0.149,0.471	-0.272
3757	ENSG00000064961.20	HMG20B	chr19	+	3574340	3574586	3574369	3574586	3573691	3573800	3757	8,1	1,0	9,7	0,0	178	149	1	1	0.87,1.0	1.0,1.0	-0.065
3758	ENSG00000064961.20	HMG20B	chr19	+	3574340	3574586	3574382	3574586	3573691	3573800	3758	19,3	64,59	23,26	1,0	191	149	0	0	0.188,0.038	0.947,1.0	-0.861
3759	ENSG00000064961.20	HMG20B	chr19	+	3574340	3574586	3574409	3574586	3573691	3573800	3759	46,26	1,0	27,39	0,0	218	149	1	1	0.969,1.0	1.0,1.0	-0.016
3761	ENSG00000064961.20	HMG20B	chr19	+	3574369	3574586	3574382	3574586	3573691	3573800	3761	12,2	64,59	14,19	1,0	162	149	0	0	0.147,0.03	0.928,1.0	-0.875
3762	ENSG00000064961.20	HMG20B	chr19	+	3574369	3574586	3574409	3574586	3573691	3573800	3762	39,25	1,0	18,32	0,0	189	149	1	1	0.969,1.0	1.0,1.0	-0.016
3764	ENSG00000064961.20	HMG20B	chr19	+	3574382	3574586	3574409	3574586	3573691	3573800	3764	91,82	1,0	5,13	0,0	176	149	1	1	0.987,1.0	1.0,1.0	-0.006
3767	ENSG00000064961.20	HMG20B	chr19	+	3575501	3575660	3575539	3575660	3574369	3574586	3767	0,1	57,61	2,1	25,35	187	149	0.453125	1	0.0,0.013	0.06,0.022	-0.034
3769	ENSG00000064961.20	HMG20B	chr19	+	3575539	3575660	3575572	3575660	3574382	3574586	3769	80,76	1,1	31,41	0,0	182	149	1	1	0.985,0.984	1.0,1.0	-0.016
3770	ENSG00000064961.20	HMG20B	chr19	+	3576260	3576307	3576263	3576307	3575539	3575660	3770	165,104	6,9	26,32	2,2	152	149	0.706287	1	0.964,0.919	0.927,0.94	0.008
3771	ENSG00000064961.20	HMG20B	chr19	+	3578508	3579083	3578701	3579083	3577980	3578113	3771	283,174	0,2	54,56	0,0	298	149	1	1	1.0,0.978	1.0,1.0	-0.011
3790	ENSG00000172009.16	THOP1	chr19	+	2811597	2811734	2811633	2811734	2810639	2810768	3790	148,58	2,0	38,27	0,0	185	149	1	1	0.983,1.0	1.0,1.0	-0.008
3791	ENSG00000104969.12	SGTA	chr19	-	2754714	2755956	2754714	2755933	2757336	2757457	3791	1,1	371,410	1,1	43,19	172	149	0.429546	0.999237	0.002,0.002	0.02,0.044	-0.03
3796	ENSG00000104969.12	SGTA	chr19	-	2767135	2767686	2767135	2767220	2768968	2769091	3796	419,396	4,0	39,32	0,0	298	149	1	1	0.981,1.0	1.0,1.0	-0.01
3798	ENSG00000141873.12	SLC39A3	chr19	-	2737047	2737379	2737047	2737300	2739944	2740017	3798	112,84	1,3	9,10	0,0	228	149	0.833447	1	0.987,0.948	1.0,1.0	-0.032
3800	ENSG00000176533.14	GNG7	chr19	-	2520607	2521089	2520607	2520725	2555148	2555188	3800	0,0	9,10	2,3	2,0	298	149	9.15907e-05	0.00101293	0.0,0.0	0.333,1.0	-0.666
3803	ENSG00000130332.16	LSM7	chr19	-	2321520	2321846	2321520	2321822	2324124	2324196	3803	0,3	102,127	2,0	4,16	173	149	0.805279	1	0.0,0.02	0.301,0.0	-0.14
3804	ENSG00000130332.16	LSM7	chr19	-	2324124	2324196	2324124	2324192	2328386	2328477	3804	49,71	7,14	0,1	0,3	153	149	1	1	0.872,0.832	NA,0.245	0.607
3805	ENSG00000104904.13	OAZ1	chr19	+	2272734	2272820	2272742	2272820	2271781	2271954	3805	1992,1331	2,5	55,40	0,0	157	149	1	1	0.999,0.996	1.0,1.0	-0.002
3806	ENSG00000104904.13	OAZ1	chr19	+	2272734	2272820	2272753	2272820	2271781	2271954	3806	2485,1725	1,0	75,65	0,0	168	149	1	1	1.0,1.0	1.0,1.0	0
3807	ENSG00000104904.13	OAZ1	chr19	+	2272734	2272820	2272804	2272820	2271781	2271954	3807	3504,2513	7,0	98,99	0,0	219	149	1	1	0.997,1.0	1.0,1.0	-0.002
3808	ENSG00000104904.13	OAZ1	chr19	+	2272742	2272820	2272753	2272820	2271781	2271954	3808	495,399	1,0	20,25	0,0	160	149	1	1	0.998,1.0	1.0,1.0	-0.001
3809	ENSG00000104904.13	OAZ1	chr19	+	2272742	2272820	2272804	2272820	2271781	2271954	3809	1514,1187	7,0	43,59	0,0	211	149	1	1	0.993,1.0	1.0,1.0	-0.004
3810	ENSG00000104904.13	OAZ1	chr19	+	2272753	2272820	2272804	2272820	2271781	2271954	3810	1020,788	7,0	23,34	0,0	200	149	1	1	0.991,1.0	1.0,1.0	-0.004
3812	ENSG00000104886.13	PLEKHJ1	chr19	-	2234149	2234255	2234149	2234240	2235761	2235828	3812	2,0	153,108	0,1	19,15	164	149	1	1	0.012,0.0	0.0,0.057	-0.022
3813	ENSG00000065000.21	AP3D1	chr19	-	2108686	2108876	2108686	2108766	2109085	2109207	3813	21,9	249,197	4,9	39,37	259	149	0.0402793	0.165074	0.046,0.026	0.056,0.123	-0.053
3815	ENSG00000065000.21	AP3D1	chr19	-	2112859	2112967	2112859	2112931	2113335	2113413	3815	65,103	123,144	17,6	17,22	185	149	0.710563	1	0.299,0.366	0.446,0.18	0.02
3816	ENSG00000065000.21	AP3D1	chr19	-	2116604	2116746	2116604	2116704	2117221	2117367	3816	346,311	2,0	55,44	0,0	191	149	1	1	0.993,1.0	1.0,1.0	-0.004
3817	ENSG00000065000.21	AP3D1	chr19	-	2116604	2116796	2116604	2116704	2117221	2117367	3817	100,102	2,0	24,25	0,0	241	149	1	1	0.969,1.0	1.0,1.0	-0.016
3818	ENSG00000065000.21	AP3D1	chr19	-	2116604	2116796	2116604	2116746	2117221	2117367	3818	5,12	251,221	8,10	39,29	199	149	9.86162e-07	1.91624e-05	0.015,0.039	0.133,0.205	-0.142
3819	ENSG00000065000.21	AP3D1	chr19	-	2121733	2121996	2121733	2121879	2123357	2123406	3819	10,5	363,314	20,20	60,60	266	149	0	0	0.015,0.009	0.157,0.157	-0.145
3820	ENSG00000065000.21	AP3D1	chr19	-	2129317	2129499	2129317	2129457	2130407	2130537	3820	16,9	343,213	8,8	68,43	191	149	0.00362557	0.0230221	0.035,0.032	0.084,0.127	-0.072
3826	ENSG00000065000.21	AP3D1	chr19	-	2130407	2130537	2130407	2130511	2132470	2132578	3826	261,190	6,0	46,33	0,0	175	149	0.673445	1	0.974,1.0	1.0,1.0	-0.013
3830	ENSG00000133275.17	CSNK1G2	chr19	+	1979751	1979835	1979793	1979835	1979494	1979643	3830	349,260	1,0	61,43	0,0	191	149	1	1	0.996,1.0	1.0,1.0	-0.002
3833	ENSG00000129968.18	ABHD17A	chr19	-	1879920	1880115	1879920	1880061	1881234	1881804	3833	413,425	0,1	33,38	0,0	203	149	1	1	1.0,0.997	1.0,1.0	-0.002
3834	ENSG00000129968.18	ABHD17A	chr19	-	1881234	1884543	1881234	1881804	1885351	1885496	3834	2,0	20,11	0,3	0,1	298	149	1	1	0.048,0.0	NA,0.6	-0.576
3835	ENSG00000261526.4	ENSG00000261526	chr19	-	1874881	1875805	1874881	1875759	1875953	1876180	3835	12,0	0,2	1,1	0,0	195	149	0.0788606	0.282138	1.0,0.0	1.0,1.0	-0.5
3838	ENSG00000071564.20	TCF3	chr19	-	1609292	1611369	1609292	1610500	1611703	1611849	3838	156,163	5,15	25,42	5,2	298	149	0.525874	1	0.94,0.845	0.714,0.913	0.079
3839	ENSG00000071564.20	TCF3	chr19	-	1612206	1612433	1612206	1612430	1615685	1615821	3839	74,28	13,16	7,2	0,1	152	149	0.00401019	0.0250383	0.848,0.632	1.0,0.662	-0.091
3840	ENSG00000071564.20	TCF3	chr19	-	1615284	1615520	1615284	1615515	1615685	1615821	3840	38,29	7,1	3,12	0,0	154	149	0.00188359	0.013511	0.84,0.966	1.0,1.0	-0.097
3842	ENSG00000071564.20	TCF3	chr19	-	1619110	1619474	1619110	1619234	1619779	1619853	3842	194,78	2,0	22,28	0,0	298	149	1	1	0.98,1.0	1.0,1.0	-0.01
3843	ENSG00000071564.20	TCF3	chr19	-	1619315	1619474	1619315	1619471	1619779	1619853	3843	192,81	21,14	20,24	0,4	152	149	0.164204	0.494172	0.9,0.85	1.0,0.855	-0.052
3844	ENSG00000071564.20	TCF3	chr19	-	1650176	1650290	1650176	1650287	1652299	1652604	3844	7,2	32,22	6,0	5,6	152	149	0.543054	1	0.177,0.082	0.541,0.0	-0.141
3849	ENSG00000071626.18	DAZAP1	chr19	+	1418200	1418370	1418203	1418370	1417499	1417540	3849	14,24	606,621	7,3	67,62	152	149	0.0894846	0.311346	0.022,0.037	0.093,0.045	-0.04
3850	ENSG00000071626.18	DAZAP1	chr19	+	1418200	1418370	1418311	1418370	1417499	1417540	3850	522,711	0,2	110,103	0,0	260	149	1	1	1.0,0.995	1.0,1.0	-0.002
3851	ENSG00000071626.18	DAZAP1	chr19	+	1418203	1418370	1418311	1418370	1417499	1417540	3851	1114,1308	0,2	170,162	0,0	257	149	1	1	1.0,0.997	1.0,1.0	-0.002
3852	ENSG00000071626.18	DAZAP1	chr19	+	1421147	1421258	1421150	1421258	1418665	1418731	3852	333,487	93,205	84,67	15,27	152	149	0.300587	0.784005	0.778,0.7	0.846,0.709	-0.038
3854	ENSG00000071626.18	DAZAP1	chr19	+	1429834	1429996	1429966	1429996	1428841	1428995	3854	16,17	1155,664	8,27	72,68	281	149	4.44089e-16	4.61662e-14	0.007,0.013	0.056,0.174	-0.105
3855	ENSG00000071626.18	DAZAP1	chr19	+	1429843	1429996	1429966	1429996	1428841	1428995	3855	15,17	1155,664	8,26	72,68	272	149	6.66134e-16	6.68615e-14	0.007,0.014	0.057,0.173	-0.104
3856	ENSG00000071626.18	DAZAP1	chr19	+	1434736	1435679	1434739	1435679	1432513	1432690	3856	433,208	77,66	36,48	4,12	152	149	0.35691	0.887944	0.846,0.755	0.898,0.797	-0.047
3857	ENSG00000115286.22	NDUFS7	chr19	+	1387777	1387847	1387810	1387847	1383902	1383942	3857	3,3	99,40	0,1	5,14	182	149	0.149884	0.461411	0.024,0.058	0.0,0.055	0.014
3860	ENSG00000115286.22	NDUFS7	chr19	+	1388742	1388938	1388832	1388938	1388524	1388593	3860	6,4	263,105	4,3	8,20	239	149	0.00223214	0.0154477	0.014,0.023	0.238,0.086	-0.143
3862	ENSG00000115286.22	NDUFS7	chr19	+	1394417	1395589	1395390	1395589	1393241	1393330	3862	30,2	79,38	5,6	3,5	298	149	0.00371543	0.0234596	0.16,0.026	0.455,0.375	-0.322
3863	ENSG00000099622.15	CIRBP	chr19	+	1270866	1271036	1270927	1271036	1269330	1269410	3863	10,15	75,66	19,22	22,24	210	149	2.23508e-07	5.11468e-06	0.086,0.139	0.38,0.394	-0.275
3864	ENSG00000099622.15	CIRBP	chr19	+	1271139	1271467	1271328	1271467	1270866	1271036	3864	66,73	4,3	49,62	0,1	298	149	0.00654442	0.0375338	0.892,0.924	1.0,0.969	-0.076
3865	ENSG00000099622.15	CIRBP	chr19	+	1271120	1271246	1271139	1271246	1270927	1271036	3865	0,2	62,70	1,0	41,47	168	149	1	1	0.0,0.025	0.021,0.0	0.002
3870	ENSG00000099625.15	CBARP	chr19	-	1234190	1234331	1234190	1234290	1234570	1234742	3870	2,0	7,2	0,2	0,1	190	149	1	1	0.183,0.0	NA,0.611	-0.519
3871	ENSG00000099625.15	CBARP	chr19	-	1235000	1235342	1235000	1235145	1235500	1235565	3871	0,1	0,3	1,1	0,0	298	149	1	1	NA,0.143	1.0,1.0	-0.857
3879	ENSG00000099817.13	POLR2E	chr19	-	1088166	1088901	1088166	1088720	1089471	1089551	3879	20,6	631,348	28,41	23,30	298	149	0	0	0.016,0.009	0.378,0.406	-0.38
3880	ENSG00000099817.13	POLR2E	chr19	-	1088168	1088896	1088168	1088720	1089471	1089551	3880	20,6	631,348	29,42	23,30	298	149	0	0	0.016,0.009	0.387,0.412	-0.387
3883	ENSG00000099817.13	POLR2E	chr19	-	1089471	1089573	1089471	1089551	1089883	1089962	3883	63,24	524,334	1,5	25,13	171	149	0.799856	1	0.095,0.059	0.034,0.251	-0.066
3886	ENSG00000099817.13	POLR2E	chr19	-	1090086	1090181	1090086	1090145	1090907	1090988	3886	4,3	268,124	1,5	12,16	185	149	0.00248973	0.0169325	0.012,0.019	0.063,0.201	-0.117
3887	ENSG00000099817.13	POLR2E	chr19	-	1090086	1090145	1090086	1090141	1093903	1094078	3887	9,8	1,0	2,1	0,0	153	149	1	1	0.898,1.0	1.0,1.0	-0.051
3890	ENSG00000099817.13	POLR2E	chr19	-	1091791	1092054	1091791	1091907	1093903	1094078	3890	21,12	578,410	13,8	28,35	296	149	9.83027e-10	3.66845e-08	0.018,0.015	0.189,0.103	-0.13
3891	ENSG00000099817.13	POLR2E	chr19	-	1091791	1091905	1091791	1091818	1095258	1095352	3891	320,219	4,2	21,22	0,0	236	149	0.730687	1	0.981,0.986	1.0,1.0	-0.016
3892	ENSG00000105443.17	CYTH2	chr19	+	48473721	48474017	48473904	48474017	48473297	48473378	3892	3,8	90,58	9,10	45,25	298	149	0.00161657	0.0118861	0.016,0.065	0.091,0.167	-0.088
3893	ENSG00000105443.17	CYTH2	chr19	+	48478065	48478145	48478068	48478145	48474837	48474949	3893	0,1	36,33	3,0	5,8	152	149	0.104877	0.351275	0.0,0.029	0.37,0.0	-0.17
3894	ENSG00000065268.12	WDR18	chr19	+	990734	990995	990851	990995	990222	990364	3894	2,1	153,80	4,3	2,1	266	149	3.2305e-08	8.6587e-07	0.007,0.007	0.528,0.627	-0.571
3896	ENSG00000065268.12	WDR18	chr19	+	990734	990995	990977	990995	990222	990364	3896	136,76	1,0	16,8	0,0	298	149	1	1	0.986,1.0	1.0,1.0	-0.007
3898	ENSG00000065268.12	WDR18	chr19	+	990851	990995	990977	990995	990222	990364	3898	287,156	1,0	16,9	0,0	275	149	1	1	0.994,1.0	1.0,1.0	-0.003
3899	ENSG00000065268.12	WDR18	chr19	+	990915	990995	990977	990995	990222	990364	3899	61,25	1,0	10,2	0,0	211	149	1	1	0.977,1.0	1.0,1.0	-0.012
3900	ENSG00000065268.12	WDR18	chr19	+	991226	991351	991233	991351	991080	991145	3900	218,104	2,2	9,12	0,0	156	149	1	1	0.99,0.98	1.0,1.0	-0.015
3902	ENSG00000065268.12	WDR18	chr19	+	991954	992121	991994	992121	991226	991351	3902	375,183	1,1	21,13	0,1	189	149	1	1	0.997,0.993	1.0,0.911	0.039
3903	ENSG00000065268.12	WDR18	chr19	+	991960	992121	991994	992121	991226	991351	3903	23,12	1,1	2,0	0,1	183	149	0.459011	1	0.949,0.907	1.0,0.0	0.428
3905	ENSG00000198858.11	R3HDM4	chr19	-	900828	901180	900828	900952	901421	901546	3905	2,0	97,26	0,1	1,11	298	149	1	1	0.01,0.0	0.0,0.043	-0.016
3908	ENSG00000198858.11	R3HDM4	chr19	-	901421	901567	901421	901546	901975	902130	3908	1,1	61,47	6,3	2,8	170	149	2.27073e-06	4.00585e-05	0.014,0.018	0.724,0.247	-0.469
3910	ENSG00000011304.23	PTBP1	chr19	+	804270	804438	804291	804438	804035	804208	3910	19,12	1210,874	10,5	75,83	170	149	9.0957e-06	0.000138183	0.014,0.012	0.105,0.05	-0.065
3914	ENSG00000011304.23	PTBP1	chr19	+	805491	805569	805512	805569	805012	805187	3914	647,457	21,4	49,48	3,0	170	149	0.740033	1	0.964,0.99	0.935,1.0	0.009
3915	ENSG00000011304.23	PTBP1	chr19	+	805491	805569	805527	805569	805012	805187	3915	668,485	0,1	54,49	0,0	185	149	1	1	1.0,0.997	1.0,1.0	-0.002
3916	ENSG00000011304.23	PTBP1	chr19	+	805512	805569	805527	805569	805012	805187	3916	42,32	0,1	8,1	0,0	164	149	1	1	1.0,0.967	1.0,1.0	-0.016
3917	ENSG00000011304.23	PTBP1	chr19	+	808359	808452	808379	808452	806407	806556	3917	293,174	4,1	18,27	0,0	169	149	1	1	0.985,0.994	1.0,1.0	-0.01
3918	ENSG00000070423.19	RNF126	chr19	-	648881	649052	648881	648975	649678	649748	3918	30,12	125,59	13,18	13,12	226	149	1.04804e-06	2.0203e-05	0.137,0.118	0.397,0.497	-0.32
3919	ENSG00000070423.19	RNF126	chr19	-	650233	650357	650233	650296	651610	651855	3919	4,0	303,130	3,7	22,24	210	149	2.10803e-06	3.74606e-05	0.009,0.0	0.088,0.171	-0.125
3927	ENSG00000070423.19	RNF126	chr19	-	651610	651855	651610	651822	652232	652296	3927	240,159	3,0	16,34	0,0	182	149	1	1	0.985,1.0	1.0,1.0	-0.008
3928	ENSG00000070423.19	RNF126	chr19	-	651610	651915	651610	651822	652232	652296	3928	62,23	3,0	8,15	0,0	242	149	0.617192	1	0.927,1.0	1.0,1.0	-0.036
3929	ENSG00000070423.19	RNF126	chr19	-	651610	651915	651610	651855	652232	652296	3929	13,5	191,141	4,4	12,23	209	149	0.0231575	0.105488	0.046,0.025	0.192,0.11	-0.115
3932	ENSG00000099821.15	POLRMT	chr19	-	617569	617776	617569	617655	618487	618586	3932	12,15	2,0	6,7	0,0	270	149	0.760861	1	0.768,1.0	1.0,1.0	-0.116
3933	ENSG00000099821.15	POLRMT	chr19	-	617776	617867	617776	617849	618487	618586	3933	27,30	159,151	1,3	2,4	167	149	0.332686	0.844569	0.132,0.151	0.308,0.401	-0.213
3934	ENSG00000099821.15	POLRMT	chr19	-	617776	617870	617776	617849	618487	618586	3934	36,33	159,151	2,3	2,4	170	149	0.160351	0.484985	0.166,0.161	0.467,0.397	-0.269
3937	ENSG00000099821.15	POLRMT	chr19	-	619209	619296	619209	619257	619585	619765	3937	183,141	2,0	21,19	1,0	188	149	1	1	0.986,1.0	0.943,1.0	0.021
3938	ENSG00000099821.15	POLRMT	chr19	-	619585	619687	619585	619675	619957	620080	3938	30,11	0,0	2,3	0,1	161	149	1	1	1.0,1.0	1.0,0.735	0.133
3939	ENSG00000099821.15	POLRMT	chr19	-	619585	619714	619585	619675	619957	620080	3939	53,19	0,0	4,4	0,1	188	149	1	1	1.0,1.0	1.0,0.76	0.12
3940	ENSG00000099821.15	POLRMT	chr19	-	619585	619765	619585	619675	619957	620080	3940	202,97	0,0	16,16	0,1	239	149	1	1	1.0,1.0	1.0,0.909	0.045
3941	ENSG00000099821.15	POLRMT	chr19	-	619585	619714	619585	619687	619957	620080	3941	24,9	1,1	2,1	0,0	176	149	0.917265	1	0.953,0.884	1.0,1.0	-0.082
3942	ENSG00000099821.15	POLRMT	chr19	-	619585	619765	619585	619687	619957	620080	3942	173,87	1,1	14,13	0,0	227	149	1	1	0.991,0.983	1.0,1.0	-0.013
3943	ENSG00000099821.15	POLRMT	chr19	-	619585	619765	619585	619714	619957	620080	3943	149,78	0,0	12,13	0,1	200	149	1	1	1.0,1.0	1.0,0.906	0.047
3945	ENSG00000099821.15	POLRMT	chr19	-	622148	622418	622148	622373	622581	622752	3945	7,3	86,42	0,1	11,11	194	149	0.0362528	0.151095	0.059,0.052	0.0,0.065	0.023
3946	ENSG00000099821.15	POLRMT	chr19	-	622581	622752	622581	622743	622820	622985	3946	123,34	7,5	9,17	0,0	158	149	0.0024412	0.0166714	0.943,0.865	1.0,1.0	-0.096
3948	ENSG00000099821.15	POLRMT	chr19	-	624718	624953	624718	624905	625123	625254	3948	6,5	153,90	0,2	22,12	197	149	0.253323	0.689907	0.029,0.04	0.0,0.112	-0.021
3949	ENSG00000099821.15	POLRMT	chr19	-	625123	625242	625123	625212	629539	630168	3949	19,6	3,0	2,0	0,0	179	149	1	1	0.841,1.0	1.0,NA	-0.08
3950	ENSG00000099821.15	POLRMT	chr19	-	625123	625254	625123	625212	629539	630168	3950	168,96	3,0	17,17	0,0	191	149	0.945708	1	0.978,1.0	1.0,1.0	-0.011
3952	ENSG00000129946.12	SHC2	chr19	-	422145	422379	422145	422373	425096	425231	3952	3,1	1,0	1,1	0,0	155	149	1	1	0.743,1.0	1.0,1.0	-0.129
3953	ENSG00000129946.12	SHC2	chr19	-	422145	422396	422145	422373	425096	425231	3953	3,0	1,0	1,1	0,0	172	149	1	1	0.722,NA	1.0,1.0	-0.278
3954	ENSG00000129946.12	SHC2	chr19	-	422145	422456	422145	422373	425096	425231	3954	27,3	1,0	2,7	0,0	232	149	1	1	0.945,1.0	1.0,1.0	-0.028
3956	ENSG00000129946.12	SHC2	chr19	-	422145	422456	422145	422379	425096	425231	3956	24,3	0,1	1,6	0,0	226	149	1	1	1.0,0.664	1.0,1.0	-0.168
3958	ENSG00000129946.12	SHC2	chr19	-	422145	422456	422145	422379	430683	430747	3958	7,1	1,0	0,6	0,0	226	149	1	1	0.822,1.0	NA,1.0	-0.089
3962	ENSG00000129946.12	SHC2	chr19	-	436379	436458	436379	436431	436629	436683	3962	2,0	29,34	0,0	6,5	176	149	0.460832	1	0.055,0.0	0.0,0.0	0.028
3970	ENSG00000075336.13	TIMM21	chr18	+	74158146	74158276	74158170	74158276	74158013	74158087	3970	1,1	18,13	0,0	2,6	173	149	0.520955	1	0.046,0.062	0.0,0.0	0.054
3981	ENSG00000176225.16	RTTN	chr18	-	70030875	70031002	70030875	70030981	70047970	70048188	3981	1,1	24,25	0,1	4,3	170	149	0.670772	1	0.035,0.034	0.0,0.226	-0.079
3982	ENSG00000176225.16	RTTN	chr18	-	70149970	70150090	70149970	70150087	70150607	70150733	3982	1,2	27,31	2,0	10,12	152	149	0.61836	1	0.035,0.059	0.164,0.0	-0.035
3983	ENSG00000176225.16	RTTN	chr18	-	70149970	70150152	70149970	70150087	70150607	70150733	3983	4,0	27,31	9,2	10,12	214	149	0.00254488	0.0171951	0.094,0.0	0.385,0.104	-0.198
3984	ENSG00000176225.16	RTTN	chr18	-	70149970	70150152	70149970	70150090	70150607	70150733	3984	3,0	0,2	7,2	0,0	211	149	0.0618457	0.233127	1.0,0.0	1.0,1.0	-0.5
3985	ENSG00000176225.16	RTTN	chr18	-	70168854	70169067	70168854	70168973	70176674	70176845	3985	41,27	2,4	19,17	0,0	243	149	0.00201724	0.0142657	0.926,0.805	1.0,1.0	-0.134
4015	ENSG00000134444.16	RELCH	chr18	+	62268868	62268948	62268880	62268948	62266700	62266749	4015	16,22	2,3	7,8	0,0	161	149	0.00780113	0.0432725	0.881,0.872	1.0,1.0	-0.123
4016	ENSG00000134444.16	RELCH	chr18	+	62268877	62268948	62268880	62268948	62266700	62266749	4016	2,0	2,3	0,3	0,0	152	149	1	1	0.495,0.0	NA,1.0	-0.752
4019	ENSG00000197563.12	PIGN	chr18	-	62095847	62095974	62095847	62095950	62101074	62101183	4019	1,1	20,28	0,0	5,6	173	149	0.328563	0.837023	0.041,0.03	0.0,0.0	0.036
4020	ENSG00000197563.12	PIGN	chr18	-	62114560	62114705	62114560	62114639	62138242	62138298	4020	0,1	14,7	1,3	0,0	215	149	2.5317e-10	1.05577e-08	0.0,0.09	1.0,1.0	-0.955
4021	ENSG00000197563.12	PIGN	chr18	-	62148213	62148338	62148213	62148253	62154544	62154651	4021	35,32	0,0	21,9	0,2	234	149	0.716336	1	1.0,1.0	1.0,0.741	0.129
4032	ENSG00000134440.13	NARS1	chr18	-	57615816	57616022	57615816	57615975	57620568	57620648	4032	11,5	184,419	4,3	18,9	196	149	0.0015147	0.0112993	0.043,0.009	0.145,0.202	-0.147
4042	ENSG00000141646.18	SMAD4	chr18	+	51051337	51051415	51051376	51051415	51049294	51049324	4042	1,0	0,2	5,5	0,0	188	149	0.0837754	0.295508	1.0,0.0	1.0,1.0	-0.5
4043	ENSG00000141646.18	SMAD4	chr18	+	51051353	51051415	51051376	51051415	51049294	51049324	4043	1,0	0,2	3,4	0,0	172	149	0.0954195	0.327841	1.0,0.0	1.0,1.0	-0.5
4044	ENSG00000141646.18	SMAD4	chr18	+	51065341	51065606	51065422	51065606	51059865	51059916	4044	5,1	66,35	3,2	4,7	230	149	0.0295604	0.127814	0.047,0.018	0.327,0.156	-0.209
4046	ENSG00000141646.18	SMAD4	chr18	+	51076614	51076776	51076637	51076776	51067018	51067187	4046	1,0	78,72	0,3	0,12	172	149	1	1	0.011,0.0	NA,0.178	-0.172
4052	ENSG00000141646.18	SMAD4	chr18	+	51077251	51077419	51077306	51077419	51076637	51076776	4052	4,5	4,0	0,2	0,1	204	149	1	1	0.422,1.0	NA,0.594	0.117
4061	ENSG00000154832.17	CXXC1	chr18	-	50282346	50282739	50282346	50282709	50282853	50283006	4061	184,99	1,0	33,37	0,0	179	149	1	1	0.994,1.0	1.0,1.0	-0.003
4062	ENSG00000154832.17	CXXC1	chr18	-	50283264	50283361	50283264	50283324	50283514	50283564	4062	90,44	0,0	16,22	1,0	186	149	1	1	1.0,1.0	0.928,1.0	0.036
4063	ENSG00000154832.17	CXXC1	chr18	-	50283704	50283842	50283704	50283815	50283893	50284101	4063	5,1	56,48	3,0	10,8	176	149	0.775053	1	0.07,0.017	0.203,0.0	-0.058
4064	ENSG00000154832.17	CXXC1	chr18	-	50284377	50284562	50284377	50284559	50284731	50284839	4064	45,23	1,0	19,14	0,3	152	149	0.309148	0.800879	0.978,1.0	1.0,0.821	0.079
4066	ENSG00000154832.17	CXXC1	chr18	-	50286739	50286883	50286739	50286858	50287422	50287508	4066	2,2	0,1	3,0	2,5	174	149	0.000402198	0.00365164	1.0,0.631	0.562,0.0	0.534
4067	ENSG00000141644.20	MBD1	chr18	-	50268843	50269915	50268843	50269811	50271468	50271540	4067	6,7	8,0	2,8	0,0	253	149	0.00105086	0.00828057	0.306,1.0	1.0,1.0	-0.347
4071	ENSG00000141644.20	MBD1	chr18	-	50268845	50269818	50268845	50269811	50271468	50271540	4071	15,3	8,0	0,6	0,0	156	149	1	1	0.642,1.0	NA,1.0	-0.179
4072	ENSG00000141644.20	MBD1	chr18	-	50268845	50269915	50268845	50269818	50271468	50271540	4072	7,7	15,3	2,4	0,2	246	149	0.0555114	0.213282	0.22,0.586	1.0,0.548	-0.371
4076	ENSG00000141644.20	MBD1	chr18	-	50269033	50269902	50269033	50269811	50271468	50271540	4076	3,6	8,0	2,8	0,0	240	149	0.00191483	0.013708	0.189,1.0	1.0,1.0	-0.405
4077	ENSG00000141644.20	MBD1	chr18	-	50269033	50269902	50269033	50269818	50271468	50271540	4077	4,6	15,3	2,4	0,2	233	149	0.0307175	0.131838	0.146,0.561	1.0,0.561	-0.427
4078	ENSG00000141644.20	MBD1	chr18	-	50268845	50271540	50268845	50269915	50272676	50272738	4078	67,32	0,1	19,24	0,0	298	149	1	1	1.0,0.941	1.0,1.0	-0.03
4079	ENSG00000141644.20	MBD1	chr18	-	50268846	50271540	50268846	50269818	50272676	50272738	4079	64,36	5,6	18,25	0,2	298	149	0.025098	0.112186	0.865,0.75	1.0,0.862	-0.124
4080	ENSG00000141644.20	MBD1	chr18	-	50269030	50269915	50269030	50269818	50272676	50272738	4080	5,8	5,6	2,4	0,2	246	149	0.0708694	0.259297	0.377,0.447	1.0,0.548	-0.362
4081	ENSG00000141644.20	MBD1	chr18	-	50273333	50273471	50273333	50273426	50273563	50273860	4081	43,27	6,10	4,7	0,9	194	149	0.703059	1	0.846,0.675	1.0,0.374	0.073
4082	ENSG00000141644.20	MBD1	chr18	-	50273563	50273863	50273563	50273860	50274185	50274353	4082	62,47	0,0	9,12	0,1	152	149	1	1	1.0,1.0	1.0,0.922	0.039
4089	ENSG00000167315.19	ACAA2	chr18	-	49785196	49785351	49785196	49785327	49787290	49787361	4089	97,92	1,1	7,4	2,1	173	149	0.0266339	0.117857	0.988,0.988	0.751,0.775	0.225
4090	ENSG00000167315.19	ACAA2	chr18	-	49785196	49785372	49785196	49785327	49787290	49787361	4090	27,41	1,1	2,2	2,1	194	149	0.0162144	0.078374	0.954,0.969	0.434,0.606	0.442
4091	ENSG00000167315.19	ACAA2	chr18	-	49785196	49785372	49785196	49785351	49787290	49787361	4091	2,3	72,54	0,0	5,2	170	149	0.201785	0.579869	0.024,0.046	0.0,0.0	0.035
4092	ENSG00000167315.19	ACAA2	chr18	-	49787290	49787379	49787290	49787361	49791469	49791599	4092	4,2	65,46	0,0	2,4	167	149	0.0660918	0.245383	0.052,0.037	0.0,0.0	0.044
4093	ENSG00000167315.19	ACAA2	chr18	-	49787290	49787382	49787290	49787361	49791469	49791599	4093	4,2	65,46	0,0	2,4	170	149	0.0685623	0.252175	0.051,0.037	0.0,0.0	0.044
4098	ENSG00000265681.9	RPL17	chr18	-	49490453	49490552	49490453	49490546	49490792	49490927	4098	1554,1583	1,0	38,29	0,0	155	149	1	1	0.999,1.0	1.0,1.0	0
4100	ENSG00000265681.9	RPL17	chr18	-	49491531	49491607	49491531	49491584	49491735	49491833	4100	121,167	28,10	7,14	2,1	172	149	0.417117	0.982794	0.789,0.935	0.752,0.924	0.024
4101	ENSG00000265681.9	RPL17	chr18	-	49491531	49491607	49491531	49491584	49492457	49492479	4101	121,167	239,341	7,14	19,6	172	149	0.324879	0.830852	0.305,0.298	0.242,0.669	-0.154
4102	ENSG00000134030.15	CTIF	chr18	+	48757873	48758405	48757918	48758405	48711618	48711695	4102	0,0	27,19	0,2	8,3	194	149	0.707983	1	0.0,0.0	0.0,0.339	-0.17
4104	ENSG00000125520.15	SLC2A4RG	chr20	+	63741369	63741479	63741438	63741479	63740376	63740531	4104	90,51	1,0	9,5	0,0	218	149	1	1	0.984,1.0	1.0,1.0	-0.008
4105	ENSG00000125520.15	SLC2A4RG	chr20	+	63742306	63742364	63742335	63742364	63742129	63742230	4105	6,2	134,75	0,2	12,16	178	149	0.538075	1	0.036,0.022	0.0,0.095	-0.019
4110	ENSG00000167220.13	HDHD2	chr18	-	47134495	47134704	47134495	47134677	47136338	47136449	4110	24,13	4,2	4,7	0,0	176	149	0.00221493	0.0153579	0.836,0.846	1.0,1.0	-0.159
4118	ENSG00000167220.13	HDHD2	chr18	-	47137234	47137333	47137234	47137296	47150381	47150505	4118	1,3	1,0	3,0	0,0	186	149	1	1	0.445,1.0	1.0,NA	-0.277
4123	ENSG00000152240.14	HAUS1	chr18	+	46119925	46120060	46119982	46120060	46118180	46118316	4123	91,58	3,0	9,6	0,0	206	149	0.438795	1	0.956,1.0	1.0,1.0	-0.022
4124	ENSG00000152240.14	HAUS1	chr18	+	46123298	46123364	46123301	46123364	46122466	46122590	4124	71,76	2,0	12,2	0,0	152	149	1	1	0.972,1.0	1.0,1.0	-0.014
4125	ENSG00000152234.17	ATP5F1A	chr18	-	46087007	46087232	46087007	46087214	46087340	46087492	4125	791,497	5,0	16,18	0,0	167	149	1	1	0.993,1.0	1.0,1.0	-0.004
4127	ENSG00000152234.17	ATP5F1A	chr18	-	46093179	46093365	46093179	46093362	46095052	46095131	4127	0,0	0,2	1,0	0,0	152	149	1	1	NA,0.0	1.0,NA	-1
4128	ENSG00000152234.17	ATP5F1A	chr18	-	46095052	46095147	46095052	46095131	46098171	46098296	4128	1,3	678,410	2,1	5,10	165	149	0.157237	0.477651	0.001,0.007	0.265,0.083	-0.17
4129	ENSG00000152223.17	EPG5	chr18	-	45876235	45876342	45876235	45876339	45878375	45878448	4129	15,2	5,0	6,5	0,0	152	149	0.00212118	0.014808	0.746,1.0	1.0,1.0	-0.127
4130	ENSG00000152223.17	EPG5	chr18	-	45882273	45882487	45882273	45882431	45884616	45884811	4130	21,21	0,0	3,13	2,0	205	149	0.519961	1	1.0,1.0	0.522,1.0	0.239
4146	ENSG00000126768.14	TIMM17B	chrX	-	48895351	48895501	48895351	48895454	48896758	48896858	4146	30,19	0,1	4,1	0,0	196	149	1	1	1.0,0.935	1.0,1.0	-0.032
4147	ENSG00000126768.14	TIMM17B	chrX	-	48895351	48895972	48895351	48895454	48896758	48896858	4147	15,6	0,1	5,7	0,0	298	149	1	1	1.0,0.75	1.0,1.0	-0.125
4148	ENSG00000126768.14	TIMM17B	chrX	-	48895351	48895972	48895351	48895501	48896758	48896858	4148	1,0	16,13	4,14	1,0	298	149	1.77414e-13	1.22373e-11	0.03,0.0	0.667,1.0	-0.819
4157	ENSG00000267374.4	MIR924HG	chr18	-	39206916	39208789	39206916	39208039	39535457	39535615	4157	0,0	2,0	0,1	0,0	298	149	1	1	0.0,NA	NA,1.0	-1
4158	ENSG00000150477.16	KIAA1328	chr18	+	36834202	36834355	36834319	36834355	36832673	36833388	4158	5,4	0,0	6,8	3,0	266	149	0.0600414	0.227682	1.0,1.0	0.528,1.0	0.236
4161	ENSG00000153391.17	INO80C	chr18	-	35487385	35487823	35487385	35487439	35489331	35489385	4161	4,0	1,0	6,1	0,0	298	149	1	1	0.667,NA	1.0,1.0	-0.333
4162	ENSG00000172466.17	ZNF24	chr18	-	35332226	35339073	35332226	35337770	35339828	35339976	4162	1,3	89,71	0,2	2,3	298	149	0.750048	1	0.006,0.021	0.0,0.25	-0.112
4179	ENSG00000134769.24	DTNA	chr18	+	34851785	34851928	34851830	34851928	34848295	34848383	4179	1,0	18,9	1,0	15,0	194	149	1	1	0.041,0.0	0.049,NA	-0.029
4180	ENSG00000134769.24	DTNA	chr18	+	34851785	34851928	34851833	34851928	34848295	34848383	4180	4,0	2,0	1,0	0,0	197	149	1	1	0.602,NA	1.0,NA	-0.398
4181	ENSG00000134769.24	DTNA	chr18	+	34851830	34851928	34851833	34851928	34848295	34848383	4181	21,9	2,0	15,0	0,0	152	149	1	1	0.911,1.0	1.0,NA	-0.044
4182	ENSG00000134769.24	DTNA	chr18	+	34863965	34864062	34863969	34864062	34858284	34858398	4182	26,31	0,1	2,2	0,0	153	149	1	1	1.0,0.968	1.0,1.0	-0.016
4183	ENSG00000134769.24	DTNA	chr18	+	34887765	34891088	34890299	34891088	34884727	34884776	4183	20,33	8,0	2,13	2,0	298	149	0.46839	1	0.556,1.0	0.333,1.0	0.112
4184	ENSG00000141431.14	ASXL3	chr18	+	33626861	33627070	33626872	33627070	33607593	33607676	4184	0,0	0,2	0,6	1,0	160	149	1	1	NA,0.0	0.0,1.0	-0.5
4186	ENSG00000141441.17	GAREM1	chr18	-	32263521	32268768	32263521	32268765	32270216	32270383	4186	7,9	6,3	0,0	0,2	152	149	1	1	0.534,0.746	NA,0.0	0.64
4187	ENSG00000134758.15	RNF138	chr18	+	32123517	32123574	32123523	32123574	32092699	32092886	4187	24,16	1,1	0,2	0,0	155	149	1	1	0.958,0.939	NA,1.0	-0.052
4190	ENSG00000134758.15	RNF138	chr18	+	32126692	32126800	32126726	32126800	32124733	32124845	4190	89,167	0,2	10,8	0,0	183	149	1	1	1.0,0.986	1.0,1.0	-0.007
4192	ENSG00000153339.16	TRAPPC8	chr18	-	31908753	31909013	31908753	31909010	31909666	31909760	4192	2,7	28,52	1,2	6,15	152	149	0.605217	1	0.065,0.117	0.14,0.116	-0.037
4196	ENSG00000046604.16	DSG2	chr18	+	31530961	31531252	31530986	31531252	31524702	31524888	4196	2,0	101,164	1,0	20,13	174	149	1	1	0.017,0.0	0.041,0.0	-0.012
4202	ENSG00000170558.11	CDH2	chr18	-	28011845	28011992	28011845	28011989	28013682	28013909	4202	92,49	2,0	8,5	0,0	152	149	1	1	0.978,1.0	1.0,1.0	-0.011
4206	ENSG00000100416.16	TRMU	chr22	+	46350290	46350463	46350345	46350463	46346421	46346544	4206	67,66	15,11	9,14	11,9	204	149	0.000311273	0.00293792	0.765,0.814	0.374,0.532	0.336
4207	ENSG00000100416.16	TRMU	chr22	+	46350290	46350463	46350349	46350463	46346421	46346544	4207	68,69	2,6	9,14	0,5	208	149	0.27411	0.731194	0.961,0.892	1.0,0.667	0.093
4208	ENSG00000100416.16	TRMU	chr22	+	46350345	46350463	46350349	46350463	46346421	46346544	4208	16,14	2,6	11,9	0,5	153	149	0.653992	1	0.886,0.694	1.0,0.637	-0.028
4210	ENSG00000100416.16	TRMU	chr22	+	46352263	46352330	46352272	46352330	46352120	46352174	4210	54,50	0,0	15,20	1,0	158	149	1	1	1.0,1.0	0.934,1.0	0.033
4211	ENSG00000100416.16	TRMU	chr22	+	46355989	46356072	46356016	46356072	46355443	46355588	4211	71,55	2,0	12,11	0,0	176	149	1	1	0.968,1.0	1.0,1.0	-0.016
4219	ENSG00000154059.12	IMPACT	chr18	+	24443048	24443152	24443099	24443152	24440495	24440618	4219	34,36	2,1	11,5	0,0	200	149	0.603992	1	0.927,0.964	1.0,1.0	-0.054
4220	ENSG00000154059.12	IMPACT	chr18	+	24443051	24443152	24443099	24443152	24440495	24440618	4220	7,9	2,1	5,3	0,0	197	149	0.102872	0.346012	0.726,0.872	1.0,1.0	-0.201
4224	ENSG00000141458.14	NPC1	chr18	-	23533354	23534559	23533354	23533517	23535468	23535700	4224	38,33	2,0	3,5	0,0	298	149	0.499055	1	0.905,1.0	1.0,1.0	-0.047
4227	ENSG00000141458.14	NPC1	chr18	-	23556242	23556664	23556242	23556613	23557116	23557190	4227	8,4	24,22	1,0	2,6	200	149	0.00875855	0.0474578	0.199,0.119	0.271,0.0	0.023
4230	ENSG00000101782.16	RIOK3	chr18	+	23463942	23464112	23463966	23464112	23462963	23463079	4230	4,0	73,64	0,2	16,8	173	149	0.707509	1	0.045,0.0	0.0,0.177	-0.066
4233	ENSG00000101782.16	RIOK3	chr18	+	23464205	23464313	23464235	23464313	23463966	23464112	4233	27,32	0,1	11,10	0,0	179	149	1	1	1.0,0.964	1.0,1.0	-0.018
4243	ENSG00000167088.12	SNRPD1	chr18	+	21623747	21623939	21623870	21623939	21622724	21622801	4243	444,509	0,7	15,22	0,0	272	149	0.762451	1	1.0,0.976	1.0,1.0	-0.012
4252	ENSG00000175322.12	ZNF519	chr18	-	14099937	14106409	14099937	14101773	14124349	14124476	4252	14,7	1,2	32,22	0,0	298	149	0.0735829	0.266731	0.875,0.636	1.0,1.0	-0.244
4254	ENSG00000101654.19	RNMT	chr18	+	13759941	13764556	13762038	13764556	13754113	13754147	4254	93,45	3,0	14,13	0,0	298	149	0.683173	1	0.939,1.0	1.0,1.0	-0.03
4256	ENSG00000085415.17	SEH1L	chr18	+	12985239	12987531	12986861	12987531	12984039	12984190	4256	165,195	4,1	1,3	0,0	298	149	0.349601	0.874993	0.954,0.99	1.0,1.0	-0.028
4264	ENSG00000101624.12	CEP76	chr18	-	12698978	12699203	12698978	12699165	12699829	12699900	4264	17,27	0,3	3,8	2,5	187	149	0.000990169	0.00788343	1.0,0.878	0.544,0.56	0.387
4265	ENSG00000101624.12	CEP76	chr18	-	12698978	12699233	12698978	12699165	12699829	12699905	4265	6,1	0,3	0,6	2,5	217	149	0.167274	0.501858	1.0,0.186	0.0,0.452	0.367
4268	ENSG00000128789.23	PSMG2	chr18	+	12718483	12718635	12718516	12718635	12712701	12712760	4268	6,3	67,52	1,0	1,1	182	149	0.113062	0.369777	0.068,0.045	0.45,0.0	-0.169
4278	ENSG00000156531.19	PHF6	chrX	+	134413487	134413657	134413490	134413657	134393908	134393952	4278	27,69	91,205	0,3	13,18	152	149	0.00297548	0.0196474	0.225,0.248	0.0,0.14	0.166
4285	ENSG00000134265.14	NAPG	chr18	+	10548942	10549096	10548966	10549096	10548298	10548378	4285	0,0	20,36	0,1	10,12	173	149	1	1	0.0,0.0	0.0,0.067	-0.034
4291	ENSG00000154845.17	PPP4R1	chr18	-	9595017	9595153	9595017	9595102	9614225	9614270	4291	28,36	16,20	3,12	5,2	200	149	0.851243	1	0.566,0.573	0.309,0.817	0.006
4294	ENSG00000017797.14	RALBP1	chr18	+	9533319	9533456	9533334	9533456	9530833	9530941	4294	1,13	43,62	1,0	6,0	164	149	1	1	0.021,0.16	0.132,NA	-0.042
4312	ENSG00000171100.17	MTM1	chrX	+	150671427	150673141	150671430	150673141	150663432	150663609	4312	11,39	0,1	8,2	0,0	152	149	1	1	1.0,0.975	1.0,1.0	-0.012
4314	ENSG00000168502.19	MTCL1	chr18	+	8818962	8819259	8819046	8819259	8812978	8813233	4314	30,16	0,0	7,9	1,0	233	149	1	1	1.0,1.0	0.817,1.0	0.092
4325	ENSG00000170579.19	DLGAP1	chr18	-	3581874	3582248	3581874	3582164	3729134	3729375	4325	6,7	0,2	4,0	0,0	233	149	1	1	1.0,0.691	1.0,NA	-0.155
4333	ENSG00000080986.14	NDC80	chr18	+	2595373	2595621	2595415	2595621	2590017	2590162	4333	4,1	68,98	0,4	5,12	191	149	0.109559	0.361242	0.044,0.008	0.0,0.206	-0.077
4351	ENSG00000079134.14	THOC1	chr18	-	224083	224200	224083	224179	224923	224994	4351	1,4	15,30	5,0	12,12	170	149	0.698093	1	0.055,0.105	0.268,0.0	-0.054
4352	ENSG00000079134.14	THOC1	chr18	-	247848	247957	247848	247908	252538	252612	4352	72,72	6,2	27,19	1,0	198	149	0.0243657	0.109621	0.9,0.964	0.953,1.0	-0.044
4356	ENSG00000141556.23	TBCD	chr17	+	82924938	82925057	82924940	82925057	82921500	82921577	4356	2,0	1,0	0,6	0,0	151	149	1	1	0.664,NA	NA,1.0	-0.336
4358	ENSG00000141556.23	TBCD	chr17	+	82927164	82927323	82927185	82927323	82926399	82926491	4358	0,1	155,59	0,1	16,25	170	149	1	1	0.0,0.015	0.0,0.034	-0.01
4363	ENSG00000229807.15	XIST	chrX	-	73826114	73827984	73826114	73827928	73829067	73829231	4363	6547,9619	819,1321	6914,5514	853,625	205	149	0.334692	0.847739	0.853,0.841	0.855,0.865	-0.013
4364	ENSG00000229807.15	XIST	chrX	-	73831065	73831274	73831065	73831206	73833237	73833374	4364	9391,17594	196,286	12862,8955	280,212	217	149	0.0768058	0.275697	0.971,0.977	0.969,0.967	0.006
4365	ENSG00000229807.15	XIST	chrX	-	73831065	73831274	73831065	73831206	73837439	73837503	4365	3287,5870	8,9	4716,3796	15,10	217	149	1	1	0.996,0.998	0.995,0.996	0.001
4369	ENSG00000178927.20	CYBC1	chr17	-	82442585	82443966	82442585	82443918	82444446	82444591	4369	6,4	1,0	1,2	0,0	197	149	1	1	0.819,1.0	1.0,1.0	-0.091
4370	ENSG00000178927.20	CYBC1	chr17	-	82442585	82444124	82442585	82443918	82444446	82444591	4370	74,34	1,0	15,19	0,0	298	149	1	1	0.974,1.0	1.0,1.0	-0.013
4372	ENSG00000178927.20	CYBC1	chr17	-	82444446	82445003	82444446	82444591	82445863	82445960	4372	3,1	14,2	2,6	6,3	298	149	0.0915556	0.31696	0.097,0.2	0.143,0.5	-0.173
4375	ENSG00000178927.20	CYBC1	chr17	-	82445863	82446202	82445863	82445960	82446622	82446696	4375	5,4	17,13	4,2	0,4	298	149	0.0824589	0.291855	0.128,0.133	1.0,0.2	-0.469
4376	ENSG00000178927.20	CYBC1	chr17	-	82446622	82446696	82446622	82446692	82447579	82450109	4376	12,12	1,0	2,1	0,0	153	149	1	1	0.921,1.0	1.0,1.0	-0.039
4378	ENSG00000178927.20	CYBC1	chr17	-	82447579	82447646	82447579	82447621	82449169	82449292	4378	2,4	16,4	2,0	0,0	174	149	1	1	0.097,0.461	1.0,NA	-0.721
4394	ENSG00000169689.16	CENPX	chr17	-	82019292	82019381	82019292	82019375	82019857	82019909	4394	133,91	0,1	1,2	0,0	155	149	1	1	1.0,0.989	1.0,1.0	-0.006
4395	ENSG00000169689.16	CENPX	chr17	-	82019307	82019381	82019307	82019378	82019857	82019909	4395	125,76	1,0	1,1	0,0	152	149	1	1	0.992,1.0	1.0,1.0	-0.004
4397	ENSG00000183010.18	PYCR1	chr17	-	81934925	81935147	81934925	81935144	81935336	81935516	4397	83,37	2,0	4,2	0,0	152	149	1	1	0.976,1.0	1.0,1.0	-0.012
4400	ENSG00000187531.15	SIRT7	chr17	-	81914293	81914530	81914293	81914456	81914603	81914702	4400	35,21	1,0	4,4	0,1	223	149	1	1	0.959,1.0	1.0,0.728	0.116
4401	ENSG00000187531.15	SIRT7	chr17	-	81914293	81914504	81914293	81914456	81914613	81914702	4401	4,1	0,2	3,1	0,0	197	149	0.264103	0.711543	1.0,0.274	1.0,1.0	-0.363
4402	ENSG00000187531.15	SIRT7	chr17	-	81914293	81914702	81914293	81914530	81915439	81915512	4402	27,21	4,0	12,16	0,0	298	149	0.0296302	0.127964	0.771,1.0	1.0,1.0	-0.115
4403	ENSG00000141522.14	ARHGDIA	chr17	-	81869329	81869625	81869329	81869406	81869740	81869957	4403	897,463	2,1	48,66	0,0	298	149	1	1	0.996,0.996	1.0,1.0	-0.004
4418	ENSG00000183048.13	SLC25A10	chr17	+	81714952	81715072	81714964	81715072	81712309	81712519	4418	35,37	2,0	8,4	0,0	161	149	0.398821	0.954992	0.942,1.0	1.0,1.0	-0.029
4420	ENSG00000183048.13	SLC25A10	chr17	+	81716680	81716855	81716811	81716855	81716008	81716050	4420	3,0	56,36	3,2	3,11	280	149	0.0110758	0.057162	0.028,0.0	0.347,0.088	-0.203
4421	ENSG00000183048.13	SLC25A10	chr17	+	81717398	81717491	81717425	81717491	81717001	81717072	4421	132,65	0,1	11,8	0,0	176	149	1	1	1.0,0.982	1.0,1.0	-0.009
4422	ENSG00000183048.13	SLC25A10	chr17	+	81717398	81717491	81717481	81717491	81717001	81717072	4422	151,83	4,0	11,8	0,1	232	149	0.724843	1	0.96,1.0	1.0,0.837	0.061
4423	ENSG00000183048.13	SLC25A10	chr17	+	81717425	81717491	81717481	81717491	81717001	81717072	4423	19,19	4,0	0,0	0,1	205	149	1	1	0.775,1.0	NA,0.0	0.887
4424	ENSG00000183048.13	SLC25A10	chr17	+	81717693	81717861	81717756	81717861	81717398	81717491	4424	2,0	2,3	0,2	0,0	212	149	1	1	0.413,0.0	NA,1.0	-0.793
4426	ENSG00000183048.13	SLC25A10	chr17	+	81717693	81717861	81717783	81717861	81717398	81717491	4426	2,0	78,37	1,3	5,4	239	149	0.0101589	0.0532256	0.016,0.0	0.111,0.319	-0.207
4428	ENSG00000183048.13	SLC25A10	chr17	+	81717756	81717861	81717783	81717861	81717398	81717491	4428	2,3	78,37	1,1	5,4	176	149	0.28036	0.744999	0.021,0.064	0.145,0.175	-0.117
4429	ENSG00000183048.13	SLC25A10	chr17	+	81717771	81717861	81717783	81717861	81717398	81717491	4429	0,0	78,37	1,1	5,4	161	149	0.52982	1	0.0,0.0	0.156,0.188	-0.172
4431	ENSG00000214087.10	ARL16	chr17	-	81682033	81682675	81682033	81682149	81683012	81683126	4431	30,26	76,73	36,32	9,11	298	149	7.19425e-14	5.36949e-12	0.165,0.151	0.667,0.593	-0.472
4434	ENSG00000013563.15	DNASE1L1	chrX	-	154403268	154403441	154403268	154403381	154403521	154403622	4434	0,0	15,2	2,4	3,0	209	149	6.89556e-06	0.000108144	0.0,0.0	0.322,1.0	-0.661
4436	ENSG00000013563.15	DNASE1L1	chrX	-	154409111	154409196	154409111	154409186	154409417	154409675	4436	16,2	0,1	1,1	0,0	159	149	1	1	1.0,0.652	1.0,1.0	-0.174
4441	ENSG00000022267.20	FHL1	chrX	+	136208454	136208641	136208535	136208641	136207791	136207961	4441	384,192	1,1	6,9	0,0	230	149	1	1	0.996,0.992	1.0,1.0	-0.006
4448	ENSG00000181045.17	SLC26A11	chr17	+	80221417	80221794	80221547	80221794	80220915	80221115	4448	8,1	15,3	1,7	0,6	279	149	0.291764	0.766902	0.222,0.151	1.0,0.384	-0.505
4453	ENSG00000181045.17	SLC26A11	chr17	+	80223179	80223337	80223251	80223337	80222654	80222847	4453	1,5	15,14	5,2	4,1	221	149	0.0109902	0.0568011	0.043,0.194	0.457,0.574	-0.397
4455	ENSG00000181045.17	SLC26A11	chr17	+	80223215	80223337	80223251	80223337	80222654	80222847	4455	0,0	15,14	5,0	4,1	185	149	0.00236809	0.0162418	0.0,0.0	0.502,0.0	-0.251
4459	ENSG00000181045.17	SLC26A11	chr17	+	80236791	80237103	80236927	80237103	80225836	80225916	4459	3,2	2,0	2,3	3,0	285	149	0.423704	0.993649	0.44,1.0	0.258,1.0	0.091
4463	ENSG00000181523.14	SGSH	chr17	-	80211868	80211950	80211868	80211923	80212070	80212274	4463	4,2	2,0	0,5	0,2	176	149	1	1	0.629,1.0	NA,0.679	0.135
4466	ENSG00000181523.14	SGSH	chr17	-	80214614	80214783	80214614	80214765	80215032	80215138	4466	2,0	17,11	0,2	3,8	167	149	0.610373	1	0.095,0.0	0.0,0.182	-0.043
4472	ENSG00000167281.21	RBFOX3	chr17	-	79096652	79096833	79096652	79096692	79097291	79097424	4472	0,0	3,2	1,0	0,1	290	149	1	1	0.0,0.0	1.0,0.0	-0.5
4475	ENSG00000167280.18	ENGASE	chr17	+	79077662	79077864	79077666	79077864	79077429	79077497	4475	6,8	1,0	3,7	0,0	153	149	1	1	0.854,1.0	1.0,1.0	-0.073
4476	ENSG00000167280.18	ENGASE	chr17	+	79085233	79085342	79085236	79085342	79084537	79084686	4476	33,19	4,0	23,20	0,0	152	149	0.123067	0.395652	0.89,1.0	1.0,1.0	-0.055
4481	ENSG00000108679.14	LGALS3BP	chr17	-	78971254	78972767	78971254	78972704	78972969	78973222	4481	6,0	178,91	2,5	7,3	212	149	4.81563e-05	0.000576845	0.023,0.0	0.167,0.539	-0.342
4482	ENSG00000108679.14	LGALS3BP	chr17	-	78972969	78973343	78972969	78973222	78974687	78974819	4482	8,4	108,50	6,0	4,3	270	149	0.0767862	0.275697	0.039,0.042	0.453,0.0	-0.186
4486	ENSG00000108679.14	LGALS3BP	chr17	-	78974687	78974843	78974687	78974819	78975964	78976156	4486	2,0	207,76	0,3	12,6	173	149	0.174225	0.517801	0.008,0.0	0.0,0.301	-0.146
4487	ENSG00000108679.14	LGALS3BP	chr17	-	78974687	78974858	78974687	78974819	78975964	78976156	4487	2,1	207,76	0,3	12,6	188	149	0.201281	0.57894	0.008,0.01	0.0,0.284	-0.133
4512	ENSG00000100220.13	RTCB	chr22	-	32397940	32398118	32397940	32398100	32399602	32399759	4512	2,0	29,68	1,0	15,10	167	149	1	1	0.058,0.0	0.056,0.0	0.001
4513	ENSG00000078687.19	TNRC6C	chr17	+	78077160	78077334	78077184	78077334	78075135	78075278	4513	0,1	93,74	0,1	11,17	173	149	1	1	0.0,0.012	0.0,0.048	-0.018
4514	ENSG00000078687.19	TNRC6C	chr17	+	78097684	78097861	78097744	78097861	78093619	78093763	4514	2,12	34,35	5,3	8,0	209	149	0.0241971	0.109097	0.04,0.196	0.308,1.0	-0.536
4515	ENSG00000085224.23	ATRX	chrX	-	77688817	77688927	77688817	77688924	77693823	77693937	4515	19,15	0,12	8,16	5,4	152	149	0.542722	1	1.0,0.551	0.611,0.797	0.072
4516	ENSG00000085224.23	ATRX	chrX	-	77688817	77688927	77688817	77688924	77696576	77696704	4516	15,7	6,6	5,1	11,4	152	149	0.00737062	0.0411951	0.71,0.534	0.308,0.197	0.369
4525	ENSG00000184640.21	SEPTIN9	chr17	+	77490741	77490859	77490747	77490859	77488726	77488864	4525	318,187	0,5	21,15	0,0	155	149	0.91009	1	1.0,0.973	1.0,1.0	-0.014
4527	ENSG00000161547.18	SRSF2	chr17	-	76735771	76735875	76735771	76735803	76736153	76736464	4527	118,88	2,2	11,47	0,0	221	149	0.703144	1	0.975,0.967	1.0,1.0	-0.029
4528	ENSG00000161547.18	SRSF2	chr17	-	76736153	76736464	76736153	76736443	76736798	76737331	4528	871,572	4,5	42,46	0,0	170	149	1	1	0.995,0.99	1.0,1.0	-0.008
4530	ENSG00000070495.16	JMJD6	chr17	-	76721797	76721933	76721797	76721930	76723771	76724058	4530	130,149	0,2	10,4	0,0	152	149	1	1	1.0,0.986	1.0,1.0	-0.007
4538	ENSG00000129667.14	RHBDF2	chr17	-	76479732	76479941	76479732	76479854	76481374	76481545	4538	1,3	7,0	3,4	3,3	236	149	0.898771	1	0.083,1.0	0.387,0.457	0.119
4542	ENSG00000182473.23	EXOC7	chr17	-	76090328	76090481	76090328	76090397	76091142	76091235	4542	8,3	20,5	13,6	0,1	233	149	9.42165e-09	2.85078e-07	0.204,0.277	1.0,0.793	-0.656
4544	ENSG00000182473.23	EXOC7	chr17	-	76103360	76103426	76103360	76103423	76103632	76103787	4544	117,89	0,0	34,34	2,0	152	149	0.396056	0.950607	1.0,1.0	0.943,1.0	0.028
4547	ENSG00000167881.16	SRP68	chr17	-	76047905	76048060	76047905	76047970	76050427	76050526	4547	5,3	264,223	8,6	14,16	239	149	1.5549e-10	6.75522e-09	0.012,0.008	0.263,0.189	-0.216
4551	ENSG00000188878.21	FBF1	chr17	-	75923185	75923641	75923185	75923638	75925346	75925446	4551	3,4	5,1	4,2	5,4	152	149	0.356503	0.887234	0.37,0.797	0.44,0.329	0.199
4552	ENSG00000267426.5	ENSG00000267426	chr17	-	75901711	75901920	75901711	75901916	75902019	75902154	4552	168,88	0,1	17,18	5,4	153	149	4.58482e-07	9.74125e-06	1.0,0.988	0.768,0.814	0.203
4553	ENSG00000132471.12	WBP2	chr17	-	75847486	75847609	75847486	75847597	75847795	75847930	4553	367,268	4,0	17,14	0,0	161	149	1	1	0.988,1.0	1.0,1.0	-0.006
4567	ENSG00000108469.16	RECQL5	chr17	-	75628671	75628825	75628671	75628762	75628933	75629110	4567	13,2	14,5	3,5	5,4	212	149	0.982684	1	0.395,0.219	0.297,0.468	-0.076
4571	ENSG00000266714.11	MYO15B	chr17	+	75592427	75592541	75592463	75592541	75592237	75592301	4571	1,0	0,0	0,0	0,2	185	149	1	1	1.0,NA	NA,0.0	1
4578	ENSG00000073350.15	LLGL2	chr17	+	75556003	75556143	75556045	75556143	75543396	75543501	4578	0,3	6,10	0,0	0,7	191	149	1	1	0.0,0.19	NA,0.0	0.095
4581	ENSG00000073350.15	LLGL2	chr17	+	75568960	75569131	75568977	75569131	75568771	75568839	4581	0,0	18,21	0,1	4,5	166	149	1	1	0.0,0.0	0.0,0.152	-0.076
4587	ENSG00000073350.15	LLGL2	chr17	+	75574110	75574260	75574212	75574260	75573951	75573980	4587	0,2	3,6	0,1	2,4	251	149	0.718707	1	0.0,0.165	0.0,0.129	0.018
4589	ENSG00000073350.15	LLGL2	chr17	+	75574452	75574668	75574609	75574668	75574212	75574260	4589	3,5	1,0	6,5	0,1	298	149	1	1	0.6,1.0	1.0,0.714	-0.057
4590	ENSG00000073350.15	LLGL2	chr17	+	75574870	75575205	75574873	75575205	75574609	75574668	4590	2,0	2,4	0,1	1,1	152	149	0.462267	1	0.495,0.0	0.0,0.495	0
4592	ENSG00000125447.19	GGA3	chr17	-	75237981	75238389	75237981	75238090	75238651	75238762	4592	70,39	0,0	28,23	1,0	298	149	1	1	1.0,1.0	0.933,1.0	0.033
4596	ENSG00000125447.19	GGA3	chr17	-	75240341	75241057	75240341	75240412	75241399	75241516	4596	230,260	2,0	107,81	0,0	298	149	1	1	0.983,1.0	1.0,1.0	-0.008
4598	ENSG00000125447.19	GGA3	chr17	-	75243062	75243258	75243062	75243166	75243446	75243570	4598	2,11	28,35	3,13	20,24	241	149	0.253009	0.689836	0.042,0.163	0.085,0.251	-0.066
4600	ENSG00000125450.12	NUP85	chr17	+	75208503	75208620	75208526	75208620	75208154	75208425	4600	0,0	2,3	2,0	3,4	172	149	0.585937	1	0.0,0.0	0.366,0.0	-0.183
4601	ENSG00000125450.12	NUP85	chr17	+	75226050	75226157	75226055	75226157	75225697	75225829	4601	137,124	1,0	15,19	1,0	154	149	1	1	0.993,1.0	0.936,1.0	0.028
4602	ENSG00000125450.12	NUP85	chr17	+	75235099	75235201	75235120	75235201	75234636	75234788	4602	105,104	4,0	4,5	0,0	170	149	0.55027	1	0.958,1.0	1.0,1.0	-0.021
4603	ENSG00000125458.8	NT5C	chr17	-	75130227	75130672	75130227	75130642	75130752	75130867	4603	4,3	58,68	3,1	13,10	179	149	0.372999	0.914218	0.054,0.035	0.161,0.077	-0.074
4614	ENSG00000161513.13	FDXR	chr17	-	74864823	74864949	74864823	74864931	74865718	74865820	4614	1,2	60,40	0,0	3,4	167	149	0.432302	0.999962	0.015,0.043	0.0,0.0	0.029
4615	ENSG00000161513.13	FDXR	chr17	-	74864823	74865015	74864823	74864931	74865718	74865820	4615	1,3	60,40	1,1	3,4	233	149	0.491974	1	0.011,0.046	0.176,0.138	-0.129
4619	ENSG00000161513.13	FDXR	chr17	-	74866783	74866879	74866783	74866876	74872035	74872107	4619	11,2	35,13	1,1	2,2	152	149	0.410404	0.97328	0.236,0.131	0.329,0.329	-0.146
4624	ENSG00000161513.13	FDXR	chr17	-	74866783	74866898	74866783	74866876	74872035	74872133	4624	2,0	35,13	0,0	2,2	171	149	0.32784	0.835473	0.047,0.0	0.0,0.0	0.024
4625	ENSG00000161513.13	FDXR	chr17	-	74866783	74867005	74866783	74866876	74872035	74872133	4625	2,0	35,13	3,0	2,2	278	149	0.23095	0.641581	0.03,0.0	0.446,0.0	-0.208
4627	ENSG00000161513.13	FDXR	chr17	-	74866783	74867005	74866783	74866879	74872035	74872133	4627	0,0	9,2	3,0	1,1	275	149	0.0867211	0.303472	0.0,0.0	0.619,0.0	-0.309
4630	ENSG00000109066.15	TMEM104	chr17	+	74795523	74795632	74795526	74795632	74795011	74795111	4630	45,54	2,6	14,14	0,1	152	149	0.0234951	0.106725	0.957,0.898	1.0,0.932	-0.038
4631	ENSG00000109066.15	TMEM104	chr17	+	74835926	74839752	74838886	74839752	74819749	74819843	4631	62,66	0,2	3,9	1,0	298	149	0.400545	0.957473	1.0,0.943	0.6,1.0	0.171
4632	ENSG00000109065.13	NAT9	chr17	-	74770554	74771858	74770554	74771834	74771959	74772054	4632	41,21	3,0	10,19	0,0	173	149	0.679269	1	0.922,1.0	1.0,1.0	-0.039
4636	ENSG00000109065.13	NAT9	chr17	-	74771959	74772051	74771959	74772039	74772217	74772277	4636	1,1	1,0	0,2	0,0	161	149	1	1	0.481,1.0	NA,1.0	-0.26
4637	ENSG00000109065.13	NAT9	chr17	-	74771959	74772054	74771959	74772039	74772217	74772277	4637	26,17	1,0	0,6	0,0	164	149	1	1	0.959,1.0	NA,1.0	-0.02
4642	ENSG00000109065.13	NAT9	chr17	-	74773542	74773688	74773542	74773685	74775621	74775707	4642	8,9	28,11	3,4	6,5	152	149	0.718817	1	0.219,0.445	0.329,0.44	-0.052
4644	ENSG00000109065.13	NAT9	chr17	-	74775621	74775852	74775621	74775707	74776266	74776323	4644	6,3	24,18	4,4	11,8	294	149	0.312067	0.806575	0.112,0.078	0.156,0.202	-0.084
4645	ENSG00000109065.13	NAT9	chr17	-	74775621	74775791	74775621	74775707	74776266	74776331	4645	5,2	24,18	2,3	11,8	233	149	0.698896	1	0.118,0.066	0.104,0.193	-0.056
4646	ENSG00000109065.13	NAT9	chr17	-	74775621	74775852	74775621	74775707	74776270	74776337	4646	6,2	5,0	4,4	0,0	294	149	0.00147704	0.0110808	0.378,1.0	1.0,1.0	-0.311
4661	ENSG00000166685.14	COG1	chr17	+	73201108	73201900	73201819	73201900	73200565	73200776	4661	57,51	0,1	18,17	0,0	298	149	1	1	1.0,0.962	1.0,1.0	-0.019
4662	ENSG00000166685.14	COG1	chr17	+	73201480	73201900	73201819	73201900	73200565	73200776	4662	26,29	0,1	13,10	0,0	298	149	1	1	1.0,0.935	1.0,1.0	-0.032
4684	ENSG00000169683.9	LRRC45	chr17	+	82025366	82025507	82025378	82025507	82024999	82025178	4684	0,1	54,24	1,2	30,30	161	149	0.321834	0.825662	0.0,0.037	0.03,0.058	-0.025
4685	ENSG00000169683.9	LRRC45	chr17	+	82025366	82025507	82025439	82025507	82024999	82025178	4685	29,12	0,0	17,22	6,1	222	149	0.000175977	0.00179354	1.0,1.0	0.655,0.937	0.204
4686	ENSG00000169683.9	LRRC45	chr17	+	82025378	82025507	82025439	82025507	82024999	82025178	4686	83,35	0,0	46,50	6,1	210	149	0.00160577	0.0118205	1.0,1.0	0.845,0.973	0.091
4687	ENSG00000169683.9	LRRC45	chr17	+	82027361	82027444	82027385	82027444	82026898	82027011	4687	0,3	45,41	0,2	25,25	173	149	0.787803	1	0.0,0.059	0.0,0.064	-0.003
4688	ENSG00000169683.9	LRRC45	chr17	+	82029018	82029185	82029092	82029185	82028612	82028683	4688	0,3	3,5	5,9	1,0	223	149	9.87528e-07	1.91633e-05	0.0,0.286	0.77,1.0	-0.742
4691	ENSG00000100105.19	PATZ1	chr22	-	31328786	31328924	31328786	31328859	31335691	31335863	4691	10,0	7,0	0,5	1,0	214	149	1	1	0.499,NA	0.0,1.0	-0.001
4694	ENSG00000197170.11	PSMD12	chr17	-	67347335	67347485	67347335	67347350	67348549	67348654	4694	446,975	1,0	72,96	0,0	284	149	1	1	0.996,1.0	1.0,1.0	-0.002
4704	ENSG00000291140.2	AMZ2P1	chr17	-	64973241	64973517	64973241	64973352	64974554	64974641	4704	23,43	0,2	9,9	0,0	298	149	0.393655	0.946274	1.0,0.915	1.0,1.0	-0.042
4715	ENSG00000108654.17	DDX5	chr17	-	64500548	64500773	64500548	64500764	64502009	64502069	4715	157,250	2,0	6,6	0,0	158	149	1	1	0.987,1.0	1.0,1.0	-0.006
4716	ENSG00000108654.17	DDX5	chr17	-	64500548	64500882	64500548	64500764	64502009	64502069	4716	89,163	2,0	57,99	0,0	267	149	1	1	0.961,1.0	1.0,1.0	-0.02
4717	ENSG00000108654.17	DDX5	chr17	-	64500548	64501143	64500548	64500764	64502009	64502069	4717	98,191	2,0	69,108	0,0	298	149	1	1	0.961,1.0	1.0,1.0	-0.02
4718	ENSG00000108654.17	DDX5	chr17	-	64500548	64501891	64500548	64500764	64502009	64502069	4718	96,191	2,0	69,108	0,0	298	149	1	1	0.96,1.0	1.0,1.0	-0.02
4719	ENSG00000108654.17	DDX5	chr17	-	64500548	64500882	64500548	64500773	64502009	64502069	4719	83,155	151,242	57,96	6,3	258	149	0	0	0.241,0.27	0.846,0.949	-0.642
4720	ENSG00000108654.17	DDX5	chr17	-	64500548	64501143	64500548	64500773	64502009	64502069	4720	107,216	151,242	74,127	6,3	298	149	0	0	0.262,0.309	0.86,0.955	-0.622
4721	ENSG00000108654.17	DDX5	chr17	-	64500548	64501891	64500548	64500773	64502009	64502069	4721	105,216	151,242	74,127	6,3	298	149	0	0	0.258,0.309	0.86,0.955	-0.624
4722	ENSG00000108654.17	DDX5	chr17	-	64500548	64501143	64500548	64500882	64502009	64502069	4722	107,204	1,0	63,93	0,0	298	149	1	1	0.982,1.0	1.0,1.0	-0.009
4723	ENSG00000108654.17	DDX5	chr17	-	64500548	64501891	64500548	64500882	64502009	64502069	4723	105,204	1,0	63,93	0,0	298	149	1	1	0.981,1.0	1.0,1.0	-0.01
4724	ENSG00000108654.17	DDX5	chr17	-	64500548	64501891	64500548	64501143	64502009	64502069	4724	241,194	2,0	99,88	0,0	298	149	1	1	0.984,1.0	1.0,1.0	-0.008
4731	ENSG00000108654.17	DDX5	chr17	-	64504676	64504880	64504676	64504842	64506075	64506289	4731	18,24	1255,1535	1,0	152,115	187	149	0.559234	1	0.011,0.012	0.005,0.0	0.009
4743	ENSG00000136478.10	TEX2	chr17	-	64188167	64188436	64188167	64188415	64193558	64193889	4743	4,0	20,26	1,0	3,2	170	149	0.156868	0.476929	0.149,0.0	0.226,0.0	-0.039
4756	ENSG00000108588.16	CCDC47	chr17	-	63746362	63746961	63746362	63746958	63751939	63752107	4756	64,63	0,1	6,5	0,0	152	149	1	1	1.0,0.984	1.0,1.0	-0.008
4760	ENSG00000108588.16	CCDC47	chr17	-	63761229	63761366	63761229	63761351	63764015	63764190	4760	1,3	9,23	2,4	0,2	164	149	8.23698e-05	0.000921229	0.092,0.106	1.0,0.645	-0.724
4762	ENSG00000198909.9	MAP3K3	chr17	+	63688767	63688881	63688788	63688881	63688526	63688594	4762	0,0	93,58	1,2	6,19	170	149	0.35266	0.880078	0.0,0.0	0.127,0.084	-0.106
4764	ENSG00000136463.10	TACO1	chr17	+	63606312	63607464	63607286	63607464	63604533	63604640	4764	153,137	0,0	14,5	0,2	298	149	0.555224	1	1.0,1.0	1.0,0.556	0.222
4765	ENSG00000159640.18	ACE	chr17	+	63488569	63488791	63488647	63488791	63486985	63487073	4765	1,0	4,5	0,0	1,2	227	149	1	1	0.141,0.0	0.0,0.0	0.07
4770	ENSG00000008283.17	CYB561	chr17	-	63437345	63437560	63437345	63437484	63446253	63446725	4770	8,7	1,0	2,1	0,0	225	149	1	1	0.841,1.0	1.0,1.0	-0.08
4779	ENSG00000146872.20	TLK2	chr17	+	62578476	62578574	62578479	62578574	62576708	62576775	4779	91,112	0,2	22,11	0,0	152	149	1	1	1.0,0.982	1.0,1.0	-0.009
4780	ENSG00000087995.17	METTL2A	chr17	+	62424176	62424310	62424218	62424310	62423884	62424012	4780	23,23	88,89	5,3	9,14	191	149	0.84096	1	0.169,0.168	0.302,0.143	-0.054
4781	ENSG00000136492.11	BRIP1	chr17	-	61776400	61776562	61776400	61776502	61778119	61778179	4781	39,16	5,0	16,12	0,0	209	149	0.012313	0.0622235	0.848,1.0	1.0,1.0	-0.076
4782	ENSG00000136492.11	BRIP1	chr17	-	61776400	61776562	61776400	61776502	61780260	61780401	4782	71,35	0,0	19,15	0,1	209	149	1	1	1.0,1.0	1.0,0.914	0.043
4788	ENSG00000062725.11	APPBP2	chr17	-	60466290	60466483	60466290	60466459	60479147	60479271	4788	2,2	39,49	0,1	6,10	173	149	1	1	0.042,0.034	0.0,0.079	-0.001
4789	ENSG00000062725.11	APPBP2	chr17	-	60479147	60479271	60479147	60479256	60494465	60494617	4789	57,72	0,0	11,18	0,1	164	149	1	1	1.0,1.0	1.0,0.942	0.029
4792	ENSG00000068097.17	HEATR6	chr17	-	60046024	60046229	60046024	60046099	60047308	60047405	4792	135,117	0,2	15,14	0,0	279	149	1	1	1.0,0.969	1.0,1.0	-0.016
4795	ENSG00000108443.15	RPS6KB1	chr17	+	59926415	59926582	59926434	59926582	59914634	59914703	4795	2,0	30,36	1,7	28,32	168	149	0.0104721	0.054608	0.056,0.0	0.031,0.162	-0.069
4798	ENSG00000108443.15	RPS6KB1	chr17	+	59936214	59936541	59936463	59936541	59935192	59935300	4798	116,148	2,3	42,53	1,2	298	149	0.695141	1	0.967,0.961	0.955,0.93	0.021
4799	ENSG00000108443.15	RPS6KB1	chr17	+	59945384	59945518	59945405	59945518	59936463	59936541	4799	1,2	1,11	1,3	1,0	170	149	0.00027305	0.00262655	0.467,0.137	0.467,1.0	-0.431
4800	ENSG00000108443.15	RPS6KB1	chr17	+	59945384	59945518	59945405	59945518	59940835	59940943	4800	2,3	117,184	2,3	15,23	170	149	0.0198879	0.0932502	0.015,0.014	0.105,0.103	-0.089
4805	ENSG00000108406.11	DHX40	chr17	+	59605445	59605674	59605490	59605674	59605114	59605184	4805	243,255	1,1	12,20	0,0	194	149	1	1	0.995,0.995	1.0,1.0	-0.005
4806	ENSG00000108395.15	TRIM37	chr17	-	59001597	59001741	59001597	59001714	59012327	59012446	4806	3,4	64,52	4,4	5,7	176	149	0.000323369	0.00302851	0.038,0.061	0.404,0.326	-0.316
4808	ENSG00000108395.15	TRIM37	chr17	-	59028414	59028723	59028414	59028579	59031895	59032090	4808	94,157	1,0	29,14	0,0	293	149	1	1	0.98,1.0	1.0,1.0	-0.01
4811	ENSG00000108395.15	TRIM37	chr17	-	59070822	59070968	59070822	59070947	59075646	59075714	4811	0,0	38,39	4,4	15,8	170	149	4.16563e-06	6.90508e-05	0.0,0.0	0.189,0.305	-0.247
4820	ENSG00000105136.23	ZNF419	chr19	+	57490130	57490185	57490146	57490185	57487717	57487983	4820	2,1	5,6	0,0	1,2	165	149	0.114795	0.374435	0.265,0.131	0.0,0.0	0.198
4822	ENSG00000105136.23	ZNF419	chr19	+	57491467	57491597	57491470	57491597	57490146	57490185	4822	1,1	4,2	0,4	0,0	152	149	1	1	0.197,0.329	NA,1.0	-0.737
4825	ENSG00000011143.20	MKS1	chr17	-	58207084	58207373	58207084	58207218	58207893	58208001	4825	2,1	9,3	1,0	2,1	298	149	0.215404	0.608026	0.1,0.143	0.2,0.0	0.021
4826	ENSG00000011143.20	MKS1	chr17	-	58208104	58208250	58208104	58208174	58208512	58208583	4826	0,4	46,7	4,4	9,5	225	149	0.0100552	0.0528697	0.0,0.275	0.227,0.346	-0.149
4827	ENSG00000011143.20	MKS1	chr17	-	58208512	58208616	58208512	58208583	58210658	58210724	4827	0,0	61,27	1,0	5,8	182	149	1	1	0.0,0.0	0.141,0.0	-0.07
4828	ENSG00000011143.20	MKS1	chr17	-	58214740	58214898	58214740	58214838	58216087	58216243	4828	2,5	34,12	4,6	8,11	209	149	0.0444992	0.178857	0.04,0.229	0.263,0.28	-0.137
4830	ENSG00000136451.10	VEZF1	chr17	-	57980602	57980804	57980602	57980786	57981872	57981936	4830	13,9	83,88	1,9	15,17	167	149	0.24428	0.671563	0.123,0.084	0.056,0.321	-0.085
4832	ENSG00000180891.14	CUEDC1	chr17	-	57862975	57863357	57862975	57863285	57866473	57866544	4832	6,2	63,52	3,3	7,8	221	149	0.0280523	0.122678	0.06,0.025	0.224,0.202	-0.171
4833	ENSG00000121057.14	AKAP1	chr17	+	57112457	57112618	57112490	57112618	57111797	57111924	4833	3,4	166,181	5,2	19,29	182	149	0.00486917	0.0292593	0.015,0.018	0.177,0.053	-0.098
4837	ENSG00000121064.14	SCPEP1	chr17	+	56998373	56998498	56998384	56998498	56996961	56997055	4837	1,1	30,29	0,0	2,2	160	149	0.371991	0.912258	0.03,0.031	0.0,0.0	0.03
4839	ENSG00000101193.9	GID8	chr20	+	62943473	62943692	62943494	62943692	62942986	62943183	4839	10,3	153,137	0,1	11,2	170	149	0.119721	0.387377	0.054,0.019	0.0,0.305	-0.116
4840	ENSG00000101193.9	GID8	chr20	+	62943473	62943692	62943500	62943692	62942986	62943183	4840	16,20	2,0	1,1	0,3	176	149	0.101762	0.343391	0.871,1.0	1.0,0.22	0.326
4842	ENSG00000101193.9	GID8	chr20	+	62943494	62943692	62943500	62943692	62942986	62943183	4842	159,154	2,0	12,2	0,3	155	149	0.0739907	0.267743	0.987,1.0	1.0,0.391	0.298
4850	ENSG00000166260.14	COX11	chr17	-	54961118	54962915	54961118	54961312	54963305	54963431	4850	95,67	7,11	10,11	0,1	298	149	0.0042795	0.0264026	0.872,0.753	1.0,0.846	-0.111
4851	ENSG00000141198.17	TOM1L1	chr17	+	54903707	54903792	54903712	54903792	54900833	54900923	4851	63,58	4,0	7,12	0,0	154	149	0.686092	1	0.938,1.0	1.0,1.0	-0.031
4852	ENSG00000141198.17	TOM1L1	chr17	+	54912665	54912815	54912686	54912815	54905488	54905567	4852	99,66	1,1	9,6	0,0	170	149	1	1	0.989,0.983	1.0,1.0	-0.014
4853	ENSG00000141198.17	TOM1L1	chr17	+	54938923	54939020	54938982	54939020	54937108	54937226	4853	114,206	1,0	17,13	0,0	208	149	1	1	0.988,1.0	1.0,1.0	-0.006
4854	ENSG00000141198.17	TOM1L1	chr17	+	54949517	54949623	54949550	54949623	54947260	54947312	4854	30,41	2,0	13,8	1,0	182	149	1	1	0.925,1.0	0.914,1.0	0.005
4855	ENSG00000141198.17	TOM1L1	chr17	+	54961234	54961956	54961237	54961956	54960565	54960627	4855	87,84	20,4	10,15	1,0	152	149	0.00283127	0.0188501	0.81,0.954	0.907,1.0	-0.072
4856	ENSG00000011260.15	UTP18	chr17	+	51275865	51275991	51275871	51275991	51273361	51273450	4856	125,159	3,5	18,10	0,1	155	149	0.173848	0.516997	0.976,0.968	1.0,0.906	0.019
4863	ENSG00000006282.23	SPATA20	chr17	+	50547664	50547767	50547719	50547767	50547183	50547285	4863	4,5	4,1	1,0	1,4	204	149	0.000675418	0.0056821	0.422,0.785	0.422,0.0	0.393
4865	ENSG00000006282.23	SPATA20	chr17	+	50549264	50549487	50549285	50549487	50549042	50549186	4865	7,7	27,23	6,2	8,5	170	149	0.257674	0.698229	0.185,0.211	0.397,0.26	-0.131
4866	ENSG00000006282.23	SPATA20	chr17	+	50549264	50549487	50549294	50549487	50549042	50549186	4866	10,10	0,4	8,2	0,2	179	149	0.287466	0.758619	1.0,0.675	1.0,0.454	0.111
4867	ENSG00000006282.23	SPATA20	chr17	+	50549285	50549487	50549294	50549487	50549042	50549186	4867	30,26	0,4	10,5	0,2	158	149	0.549668	1	1.0,0.86	1.0,0.702	0.079
4875	ENSG00000167107.14	ACSF2	chr17	+	50472385	50472579	50472427	50472579	50471027	50471135	4875	0,0	9,7	1,0	0,2	191	149	1	1	0.0,0.0	1.0,0.0	-0.5
4877	ENSG00000154920.16	EME1	chr17	+	50378594	50378681	50378599	50378681	50376065	50376193	4877	26,15	0,6	4,0	1,1	154	149	0.75803	1	1.0,0.708	0.795,0.0	0.456
4878	ENSG00000154920.16	EME1	chr17	+	50379067	50379224	50379106	50379224	50378773	50378895	4878	4,0	17,26	0,1	2,2	188	149	0.175385	0.520506	0.157,0.0	0.0,0.284	-0.063
4895	ENSG00000108819.12	PPP1R9B	chr17	-	50140092	50140359	50140092	50140228	50141268	50141373	4895	28,10	254,255	27,12	5,5	280	149	0	0	0.055,0.02	0.742,0.561	-0.614
4899	ENSG00000121067.20	SPOP	chr17	-	49675894	49676016	49675894	49675992	49677932	49678046	4899	10,3	4,0	5,4	0,0	173	149	0.0107653	0.055837	0.683,1.0	1.0,1.0	-0.158
4900	ENSG00000167085.15	PHB1	chr17	-	49404051	49405204	49404051	49405192	49406803	49406854	4900	145,92	8,8	4,2	0,0	161	149	0.00619748	0.0357503	0.944,0.914	1.0,1.0	-0.071
4904	ENSG00000095066.13	HOOK2	chr19	-	12764813	12764917	12764813	12764914	12764998	12765081	4904	6,11	0,1	10,4	4,1	152	149	0.00361957	0.0230141	1.0,0.915	0.71,0.797	0.204
4906	ENSG00000095066.13	HOOK2	chr19	-	12772612	12772702	12772612	12772680	12772779	12772912	4906	0,0	5,4	1,0	15,5	171	149	1	1	0.0,0.0	0.055,0.0	-0.028
4908	ENSG00000159217.11	IGF2BP1	chr17	+	49043427	49043550	49043433	49043550	49042241	49042377	4908	522,453	9,7	67,58	3,1	155	149	0.624314	1	0.982,0.984	0.955,0.982	0.015
4909	ENSG00000159217.11	IGF2BP1	chr17	+	49043966	49044086	49043969	49044086	49043427	49043550	4909	596,360	118,100	59,37	18,8	152	149	0.70072	1	0.832,0.779	0.763,0.819	0.015
4910	ENSG00000136436.17	CALCOCO2	chr17	+	48841697	48841887	48841773	48841887	48831034	48831078	4910	72,47	2,0	16,4	0,0	225	149	0.496851	1	0.96,1.0	1.0,1.0	-0.02
4917	ENSG00000233101.11	HOXB-AS3	chr17	+	48601427	48602343	48602074	48602343	48600446	48600545	4917	13,2	8,3	1,1	0,0	298	149	8.9891e-07	1.77513e-05	0.448,0.25	1.0,1.0	-0.651
4922	ENSG00000120093.13	HOXB3	chr17	-	48552026	48552632	48552026	48552487	48555530	48555672	4922	31,24	2,0	14,9	0,0	294	149	0.552105	1	0.887,1.0	1.0,1.0	-0.056
4926	ENSG00000082641.17	NFE2L1	chr17	+	48056385	48056598	48056418	48056598	48050606	48051628	4926	93,167	12,7	9,13	1,0	182	149	0.0151658	0.0741675	0.864,0.951	0.88,1.0	-0.032
4928	ENSG00000108465.16	CDK5RAP3	chr17	+	47975158	47975337	47975171	47975337	47974399	47974448	4928	87,53	0,0	2,11	0,1	162	149	1	1	1.0,1.0	1.0,0.91	0.045
4930	ENSG00000108439.12	PNPO	chr17	+	47943305	47943430	47943342	47943430	47941505	47941602	4930	18,15	0,0	1,2	1,0	186	149	1	1	1.0,1.0	0.445,1.0	0.277
4936	ENSG00000141295.15	SCRN2	chr17	-	47838530	47838719	47838530	47838696	47838790	47839006	4936	7,10	53,48	0,2	8,6	172	149	0.0878407	0.306726	0.103,0.153	0.0,0.224	0.016
4939	ENSG00000141295.15	SCRN2	chr17	-	47839443	47839858	47839443	47839643	47840190	47840372	4939	8,0	40,30	3,7	1,2	298	149	1.45606e-06	2.71686e-05	0.091,0.0	0.6,0.636	-0.573
4942	ENSG00000198933.12	TBKBP1	chr17	+	47697088	47697193	47697094	47697193	47696710	47696833	4942	78,50	5,2	31,42	3,2	155	149	0.834223	1	0.937,0.96	0.909,0.953	0.017
4943	ENSG00000198933.12	TBKBP1	chr17	+	47699319	47699495	47699322	47699495	47698594	47698775	4943	47,34	8,3	18,18	1,0	152	149	0.00176281	0.0128088	0.852,0.917	0.946,1.0	-0.088
4944	ENSG00000141279.19	NPEPPS	chr17	+	47577044	47577160	47577080	47577160	47569416	47569494	4944	0,2	0,0	3,11	0,1	185	149	1	1	NA,1.0	1.0,0.899	0.05
4946	ENSG00000141279.19	NPEPPS	chr17	+	47586364	47587344	47587229	47587344	47586147	47586244	4946	209,338	0,0	22,34	0,1	298	149	1	1	1.0,1.0	1.0,0.944	0.028
4947	ENSG00000141279.19	NPEPPS	chr17	+	47591903	47592060	47591955	47592060	47590716	47590881	4947	0,2	164,215	2,2	22,14	201	149	0.141558	0.4423	0.0,0.007	0.063,0.096	-0.076
4948	ENSG00000141279.19	NPEPPS	chr17	+	47605332	47605552	47605465	47605552	47603914	47604049	4948	520,583	1,0	84,65	0,4	282	149	0.262107	0.707343	0.996,1.0	1.0,0.896	0.05
4949	ENSG00000141279.19	NPEPPS	chr17	+	47619277	47619784	47619736	47619784	47619008	47619164	4949	3,6	107,79	17,27	9,8	298	149	0	0	0.014,0.037	0.486,0.628	-0.531
4950	ENSG00000004897.13	CDC27	chr17	-	47122443	47122600	47122443	47122536	47123885	47123960	4950	99,174	5,4	22,17	0,0	213	149	0.0246739	0.110562	0.933,0.968	1.0,1.0	-0.049
4951	ENSG00000004897.13	CDC27	chr17	-	47141852	47142025	47141852	47142022	47142228	47142436	4951	12,24	11,41	4,6	4,10	152	149	0.951129	1	0.517,0.365	0.495,0.37	0.009
4952	ENSG00000004897.13	CDC27	chr17	-	47151805	47151936	47151805	47151918	47154671	47154786	4952	20,76	242,481	4,12	40,42	167	149	0.384062	0.931763	0.069,0.124	0.082,0.203	-0.046
4953	ENSG00000004897.13	CDC27	chr17	-	47154671	47154864	47154671	47154786	47156912	47157124	4953	9,31	230,494	24,26	37,37	227	149	0	0	0.025,0.04	0.299,0.316	-0.275
4954	ENSG00000004897.13	CDC27	chr17	-	47156912	47157124	47156912	47156983	47157229	47157384	4954	182,402	8,20	56,67	1,1	290	149	0.00699327	0.0394649	0.921,0.912	0.966,0.972	-0.052
4955	ENSG00000004897.13	CDC27	chr17	-	47171916	47172064	47171916	47172013	47181561	47181637	4955	68,58	1,4	16,22	0,0	200	149	0.0632865	0.237066	0.981,0.915	1.0,1.0	-0.052
4956	ENSG00000108433.17	GOSR2	chr17	+	46929519	46929584	46929523	46929584	46923137	46923221	4956	95,124	4,5	29,37	0,0	153	149	0.0229893	0.104886	0.959,0.96	1.0,1.0	-0.04
4957	ENSG00000108433.17	GOSR2	chr17	+	46931098	46931207	46931101	46931207	46929519	46929584	4957	149,183	5,5	41,39	1,2	152	149	0.844859	1	0.967,0.973	0.976,0.95	0.007
4960	ENSG00000108433.17	GOSR2	chr17	+	46963696	46965039	46963834	46965039	46938598	46938704	4960	2,5	0,1	7,6	0,0	287	149	1	1	1.0,0.722	1.0,1.0	-0.139
4962	ENSG00000108433.17	GOSR2	chr17	+	46963696	46965039	46964343	46965039	46938598	46938704	4962	1,1	0,0	0,5	1,0	298	149	1	1	1.0,1.0	0.0,1.0	0.5
4964	ENSG00000108433.17	GOSR2	chr17	+	46963834	46965039	46964343	46965039	46938598	46938704	4964	1,2	0,0	0,5	1,0	298	149	1	1	1.0,1.0	0.0,1.0	0.5
4965	ENSG00000108433.17	GOSR2	chr17	+	46964001	46965039	46964343	46965039	46938598	46938704	4965	1,1	0,0	0,5	1,0	298	149	1	1	1.0,1.0	0.0,1.0	0.5
4967	ENSG00000178026.14	LRRC75B	chr22	-	24588213	24589393	24588213	24588329	24589820	24589949	4967	1,5	7,1	0,0	3,0	298	149	1	1	0.067,0.714	0.0,NA	0.39
4980	ENSG00000161714.13	PLCD3	chr17	-	45114249	45114501	45114249	45114366	45115093	45115244	4980	13,2	31,24	2,10	2,2	284	149	0.00269299	0.0180616	0.18,0.042	0.344,0.724	-0.423
4981	ENSG00000161714.13	PLCD3	chr17	-	45115093	45115244	45115093	45115235	45115343	45115490	4981	76,38	1,0	10,7	0,0	158	149	1	1	0.986,1.0	1.0,1.0	-0.007
4982	ENSG00000161714.13	PLCD3	chr17	-	45115343	45115490	45115343	45115487	45116631	45116751	4982	49,28	6,0	1,3	0,0	152	149	0.0179124	0.0852231	0.889,1.0	1.0,1.0	-0.055
4985	ENSG00000172992.14	DCAKD	chr17	-	45034773	45035002	45034773	45034999	45051552	45051661	4985	3,2	16,18	1,1	0,1	152	149	0.00292716	0.0194086	0.155,0.098	1.0,0.495	-0.621
4989	ENSG00000108883.14	EFTUD2	chr17	-	44853516	44853659	44853516	44853635	44854268	44854356	4989	0,0	315,186	3,0	6,9	173	149	0.156079	0.475225	0.0,0.0	0.301,0.0	-0.15
4992	ENSG00000108883.14	EFTUD2	chr17	-	44859904	44860213	44859904	44860045	44860431	44860543	4992	12,3	310,269	40,47	19,41	298	149	0	0	0.019,0.006	0.513,0.364	-0.426
4994	ENSG00000108883.14	EFTUD2	chr17	-	44883092	44883158	44883092	44883128	44883648	44883724	4994	417,411	0,4	53,73	0,1	179	149	1	1	1.0,0.988	1.0,0.984	0.002
4997	ENSG00000161682.16	FAM171A2	chr17	-	44353214	44355218	44353214	44355191	44355714	44355841	4997	0,1	28,7	0,0	2,0	176	149	1	1	0.0,0.108	0.0,NA	0.054
4998	ENSG00000030582.20	GRN	chr17	+	44349136	44349302	44349157	44349302	44345259	44345334	4998	2,5	63,23	0,0	3,5	170	149	0.00932888	0.0498248	0.027,0.16	0.0,0.0	0.093
4999	ENSG00000030582.20	GRN	chr17	+	44349157	44349302	44349161	44349302	44345281	44345334	4999	66,23	1,0	3,5	3,0	153	149	0.0658333	0.244778	0.985,1.0	0.493,1.0	0.246
5006	ENSG00000030582.20	GRN	chr17	+	44349624	44349751	44349666	44349751	44349425	44349551	5006	10,3	242,138	4,1	7,9	191	149	0.0237785	0.107629	0.031,0.017	0.308,0.08	-0.17
5007	ENSG00000030582.20	GRN	chr17	+	44350441	44350577	44350461	44350577	44350227	44350340	5007	480,317	1,2	18,15	0,0	169	149	1	1	0.998,0.993	1.0,1.0	-0.004
5009	ENSG00000030582.20	GRN	chr17	+	44352660	44353102	44352715	44353102	44352340	44352571	5009	508,330	0,2	17,12	0,0	204	149	1	1	1.0,0.992	1.0,1.0	-0.004
5020	ENSG00000125319.16	HROB	chr17	+	44150960	44151044	44150963	44151044	44147857	44149027	5020	20,13	6,2	2,4	2,0	152	149	0.266759	0.717238	0.766,0.864	0.495,1.0	0.067
5023	ENSG00000125319.16	HROB	chr17	+	44154552	44154664	44154555	44154664	44152636	44152777	5023	1,2	19,17	0,0	4,1	152	149	0.544388	1	0.049,0.103	0.0,0.0	0.076
5032	ENSG00000108852.17	MPP2	chr17	-	43880690	43880884	43880690	43880852	43881089	43881158	5032	0,0	25,16	1,0	1,4	181	149	1	1	0.0,0.0	0.452,0.0	-0.226
5033	ENSG00000108852.17	MPP2	chr17	-	43881243	43881377	43881243	43881349	43881457	43881589	5033	1,2	36,21	2,1	1,17	177	149	0.606924	1	0.023,0.074	0.627,0.047	-0.289
5044	ENSG00000198496.13	NBR2	chr17	+	43139815	43140283	43140164	43140283	43138656	43138922	5044	11,8	0,1	6,12	0,0	298	149	1	1	1.0,0.8	1.0,1.0	-0.1
5047	ENSG00000012048.27	BRCA1	chr17	-	43076487	43076614	43076487	43076611	43079333	43079399	5047	7,0	0,1	0,1	0,0	152	149	1	1	1.0,0.0	NA,1.0	-0.5
5048	ENSG00000012048.27	BRCA1	chr17	-	43076487	43076614	43076487	43076611	43082403	43082572	5048	68,70	23,15	17,15	16,7	152	149	0.018173	0.0862249	0.743,0.821	0.51,0.677	0.189
5049	ENSG00000012048.27	BRCA1	chr17	-	43082403	43082575	43082403	43082572	43090943	43091032	5049	73,89	11,10	41,26	4,4	152	149	0.676368	1	0.867,0.897	0.909,0.864	-0.005
5050	ENSG00000012048.27	BRCA1	chr17	-	43099774	43099880	43099774	43099877	43104121	43104261	5050	20,39	14,21	29,16	0,13	152	149	0.0752301	0.271351	0.583,0.645	1.0,0.547	-0.16
5052	ENSG00000012048.27	BRCA1	chr17	-	43124016	43124115	43124016	43124102	43125276	43125343	5052	52,55	1,0	13,7	0,0	162	149	1	1	0.98,1.0	1.0,1.0	-0.01
5054	ENSG00000266967.8	AARSD1	chr17	-	42951799	42951894	42951799	42951891	42953723	42953778	5054	32,22	0,0	10,9	2,0	152	149	0.815538	1	1.0,1.0	0.831,1.0	0.085
5056	ENSG00000266967.8	AARSD1	chr17	-	42956403	42956560	42956403	42956504	42957137	42957195	5056	80,83	2,2	30,48	2,3	205	149	0.211794	0.600984	0.967,0.968	0.916,0.921	0.049
5058	ENSG00000131467.13	PSME3	chr17	+	42838691	42838799	42838730	42838799	42838092	42838205	5058	12,3	470,418	0,1	26,38	188	149	0.597609	1	0.02,0.006	0.0,0.02	0.003
5059	ENSG00000131467.13	PSME3	chr17	+	42838944	42839012	42838947	42839012	42838730	42838799	5059	674,638	0,2	22,42	0,0	152	149	1	1	1.0,0.997	1.0,1.0	-0.002
5062	ENSG00000126581.14	BECN1	chr17	-	42819547	42819609	42819547	42819606	42820773	42820841	5062	91,51	0,1	17,12	0,0	152	149	1	1	1.0,0.98	1.0,1.0	-0.01
5063	ENSG00000126562.18	WNK4	chr17	+	42794771	42795382	42794774	42795382	42794613	42794668	5063	1,3	0,1	7,2	2,0	152	149	0.873607	1	1.0,0.746	0.774,1.0	-0.014
5068	ENSG00000033627.19	ATP6V0A1	chr17	+	42477638	42477742	42477656	42477742	42470089	42470218	5068	17,14	0,0	9,11	0,1	167	149	1	1	1.0,1.0	1.0,0.908	0.046
5069	ENSG00000033627.19	ATP6V0A1	chr17	+	42477638	42477742	42477659	42477742	42470089	42470218	5069	17,17	22,40	9,11	7,6	170	149	0.0199119	0.0933024	0.404,0.271	0.53,0.616	-0.235
5070	ENSG00000033627.19	ATP6V0A1	chr17	+	42477656	42477742	42477659	42477742	42470089	42470218	5070	0,3	22,40	0,1	7,6	152	149	0.780146	1	0.0,0.068	0.0,0.14	-0.036
5071	ENSG00000033627.19	ATP6V0A1	chr17	+	42516771	42522578	42521026	42522578	42514288	42514460	5071	5,15	217,215	16,22	14,11	298	149	0	0	0.011,0.034	0.364,0.5	-0.409
5074	ENSG00000168256.19	NKIRAS2	chr17	+	42022375	42022640	42022398	42022640	42021563	42021671	5074	4,11	85,91	2,4	7,7	172	149	0.0430437	0.174113	0.039,0.095	0.198,0.331	-0.198
5075	ENSG00000168256.19	NKIRAS2	chr17	+	42022564	42022640	42022569	42022640	42022398	42022472	5075	5,5	1,1	0,1	0,0	154	149	1	1	0.829,0.829	NA,1.0	-0.171
5076	ENSG00000168259.18	DNAJC7	chr17	-	41982254	41982601	41982254	41982401	41983562	41983636	5076	3,2	23,62	6,11	21,8	298	149	4.30229e-05	0.000522887	0.061,0.016	0.125,0.407	-0.228
5078	ENSG00000168259.18	DNAJC7	chr17	-	41994869	41994983	41994869	41994944	41996310	41996424	5078	7,3	136,190	1,4	9,17	188	149	0.0509793	0.198861	0.039,0.012	0.081,0.157	-0.093
5082	ENSG00000173812.12	EIF1	chr17	+	41690087	41690189	41690090	41690189	41689777	41689941	5082	948,1066	1,1	22,57	0,0	152	149	1	1	0.999,0.999	1.0,1.0	-0.001
5093	ENSG00000225190.13	PLEKHM1	chr17	-	45439476	45439634	45439476	45439577	45440162	45440226	5093	45,46	1,2	14,7	0,0	206	149	0.490858	1	0.97,0.943	1.0,1.0	-0.044
5097	ENSG00000225190.13	PLEKHM1	chr17	-	45482436	45482641	45482436	45482525	45490651	45490751	5097	0,0	20,5	0,6	7,9	265	149	0.00159182	0.0117422	0.0,0.0	0.0,0.273	-0.137
5100	ENSG00000094804.13	CDC6	chr17	+	40293455	40293631	40293458	40293631	40291468	40291668	5100	121,200	5,7	46,34	1,0	152	149	0.0353749	0.148029	0.96,0.966	0.978,1.0	-0.026
5101	ENSG00000094804.13	CDC6	chr17	+	40296687	40296767	40296702	40296767	40295355	40295456	5101	3,9	94,82	2,2	6,3	164	149	0.115239	0.375714	0.028,0.091	0.232,0.377	-0.245
5104	ENSG00000094804.13	CDC6	chr17	+	40301440	40301608	40301467	40301608	40300827	40301030	5104	3,2	209,310	1,0	14,13	176	149	1	1	0.012,0.005	0.057,0.0	-0.02
5109	ENSG00000008838.22	MED24	chr17	-	40019784	40020010	40019784	40019933	40020272	40020353	5109	11,13	378,91	10,8	51,63	226	149	0.00462636	0.0281488	0.019,0.086	0.114,0.077	-0.043
5110	ENSG00000008838.22	MED24	chr17	-	40020272	40020353	40020272	40020350	40020527	40020619	5110	53,3	0,1	11,8	2,2	152	149	0.0115026	0.0589881	1.0,0.746	0.844,0.797	0.052
5111	ENSG00000008838.22	MED24	chr17	-	40020272	40020353	40020272	40020350	40021954	40022054	5111	278,147	38,35	45,59	7,2	152	149	0.0235282	0.106735	0.878,0.805	0.863,0.967	-0.074
5112	ENSG00000008838.22	MED24	chr17	-	40020272	40020389	40020272	40020350	40021954	40022054	5112	56,5	38,35	9,9	7,2	188	149	0.0460212	0.183757	0.539,0.102	0.505,0.781	-0.323
5113	ENSG00000008838.22	MED24	chr17	-	40020272	40020482	40020272	40020350	40021954	40022054	5113	76,8	38,35	28,14	7,2	281	149	0.00158256	0.0116857	0.515,0.108	0.68,0.788	-0.422
5114	ENSG00000008838.22	MED24	chr17	-	40020272	40020389	40020272	40020353	40021954	40022054	5114	6,2	228,144	4,4	40,54	185	149	0.0247651	0.110902	0.021,0.011	0.075,0.056	-0.05
5115	ENSG00000008838.22	MED24	chr17	-	40020272	40020482	40020272	40020353	40021954	40022054	5115	26,5	228,144	23,9	40,54	278	149	4.05306e-05	0.000494867	0.058,0.018	0.236,0.082	-0.121
5116	ENSG00000008838.22	MED24	chr17	-	40020272	40020482	40020272	40020389	40021954	40022054	5116	20,4	0,1	19,6	0,1	242	149	1	1	1.0,0.711	1.0,0.787	-0.038
5117	ENSG00000008838.22	MED24	chr17	-	40023130	40023416	40023130	40023395	40026155	40026331	5117	11,13	366,211	5,4	40,29	170	149	0.049161	0.193585	0.026,0.051	0.099,0.108	-0.065
5118	ENSG00000008838.22	MED24	chr17	-	40028825	40029004	40028825	40028968	40029747	40029859	5118	14,10	262,168	11,12	85,63	185	149	0.00260282	0.0175296	0.041,0.046	0.094,0.133	-0.07
5120	ENSG00000008838.22	MED24	chr17	-	40033344	40033771	40033344	40033456	40034915	40034972	5120	17,13	61,38	48,39	10,2	298	149	3.33067e-16	3.51265e-14	0.122,0.146	0.706,0.907	-0.672
5121	ENSG00000008838.22	MED24	chr17	-	40053468	40053657	40053468	40053635	40054360	40054405	5121	55,83	27,47	26,31	23,19	171	149	0.253139	0.689836	0.64,0.606	0.496,0.587	0.082
5122	ENSG00000141736.15	ERBB2	chr17	+	39694680	39695181	39694987	39695181	39693260	39693325	5122	1,3	5,16	13,2	5,4	298	149	0.00435435	0.0267849	0.091,0.086	0.565,0.2	-0.294
5123	ENSG00000141736.15	ERBB2	chr17	+	39708320	39708534	39708329	39708534	39706989	39707141	5123	69,55	3,0	12,14	1,0	158	149	0.645312	1	0.956,1.0	0.919,1.0	0.018
5124	ENSG00000141736.15	ERBB2	chr17	+	39716270	39716433	39716300	39716433	39715739	39715939	5124	2,0	37,7	0,2	5,6	179	149	0.598343	1	0.043,0.0	0.0,0.217	-0.087
5125	ENSG00000141736.15	ERBB2	chr17	+	39723285	39723457	39723318	39723457	39719786	39719834	5125	0,1	36,19	2,6	6,4	182	149	7.71617e-06	0.000119469	0.0,0.041	0.214,0.551	-0.362
5129	ENSG00000131748.17	STARD3	chr17	+	39656909	39657085	39657007	39657085	39653480	39653750	5129	2,2	6,4	7,3	2,3	247	149	0.0276495	0.121501	0.167,0.232	0.679,0.376	-0.328
5130	ENSG00000131748.17	STARD3	chr17	+	39657934	39658026	39657972	39658026	39657774	39657852	5130	0,0	38,28	4,0	0,3	187	149	0.0169021	0.0810519	0.0,0.0	1.0,0.0	-0.5
5131	ENSG00000131748.17	STARD3	chr17	+	39657972	39658522	39658404	39658522	39657774	39657852	5131	39,36	5,0	4,15	0,0	298	149	0.0102717	0.0537363	0.796,1.0	1.0,1.0	-0.102
5133	ENSG00000131748.17	STARD3	chr17	+	39658708	39658820	39658721	39658820	39658404	39658522	5133	0,0	33,19	0,4	1,3	162	149	0.00914757	0.049081	0.0,0.0	0.0,0.551	-0.276
5134	ENSG00000131748.17	STARD3	chr17	+	39658708	39658820	39658738	39658820	39658404	39658522	5134	3,3	1,0	1,7	0,0	179	149	1	1	0.714,1.0	1.0,1.0	-0.143
5135	ENSG00000131748.17	STARD3	chr17	+	39658721	39658820	39658738	39658820	39658404	39658522	5135	36,22	1,0	2,6	0,0	166	149	1	1	0.97,1.0	1.0,1.0	-0.015
5136	ENSG00000131748.17	STARD3	chr17	+	39659420	39659553	39659460	39659553	39659050	39659106	5136	0,0	54,50	0,2	14,20	189	149	0.364716	0.900589	0.0,0.0	0.0,0.073	-0.036
5139	ENSG00000131748.17	STARD3	chr17	+	39660159	39660273	39660210	39660273	39659460	39659553	5139	0,1	47,48	6,4	4,5	200	149	3.62565e-09	1.20474e-07	0.0,0.015	0.528,0.373	-0.443
5140	ENSG00000131748.17	STARD3	chr17	+	39660409	39660526	39660430	39660526	39660210	39660273	5140	2,2	54,42	1,1	11,11	170	149	0.474003	1	0.031,0.04	0.074,0.074	-0.038
5143	ENSG00000108298.13	RPL19	chr17	+	39204098	39204187	39204104	39204187	39201212	39201270	5143	44,44	2,0	1,3	0,0	155	149	0.5575	1	0.955,1.0	1.0,1.0	-0.022
5146	ENSG00000108298.13	RPL19	chr17	+	39204098	39204187	39204167	39204187	39202988	39203029	5146	540,596	4,4	24,21	0,0	218	149	1	1	0.989,0.99	1.0,1.0	-0.01
5147	ENSG00000108298.13	RPL19	chr17	+	39204049	39204187	39204076	39204187	39202988	39203109	5147	20,13	3094,2524	1,1	62,47	176	149	1	1	0.005,0.004	0.013,0.018	-0.011
5149	ENSG00000067191.18	CACNB1	chr17	-	39177349	39177604	39177349	39177535	39177983	39178079	5149	2,0	11,7	0,2	4,2	218	149	0.469633	1	0.111,0.0	0.0,0.406	-0.148
5150	ENSG00000161381.15	PLXDC1	chr17	-	39079103	39079528	39079103	39079164	39083458	39083540	5150	4,2	0,1	1,0	0,0	298	149	1	1	1.0,0.5	1.0,NA	-0.25
5151	ENSG00000293194.2	RDM1P5	chr17	+	39072957	39073212	39073067	39073212	39072466	39072591	5151	0,0	0,2	0,3	0,0	259	149	1	1	NA,0.0	NA,1.0	-1
5152	ENSG00000125691.16	RPL23	chr17	-	38850080	38850214	38850080	38850199	38850361	38850475	5152	3111,2927	4,1	82,113	0,0	164	149	1	1	0.999,1.0	1.0,1.0	0
5158	ENSG00000125691.16	RPL23	chr17	-	38850361	38850475	38850361	38850466	38852603	38852732	5158	10479,11350	1,0	264,244	0,0	158	149	1	1	1.0,1.0	1.0,1.0	0
5163	ENSG00000276023.6	DUSP14	chr17	+	37510589	37510764	37510676	37510764	37489890	37489958	5163	2,2	38,22	7,6	3,1	236	149	5.65526e-09	1.80102e-07	0.032,0.054	0.596,0.791	-0.65
5166	ENSG00000100360.16	IFT27	chr22	-	36762903	36763016	36762903	36763013	36763918	36764036	5166	1,0	48,50	1,0	0,1	152	149	1	1	0.02,0.0	1.0,0.0	-0.49
5169	ENSG00000276234.6	TADA2A	chr17	+	37440504	37440662	37440508	37440662	37437766	37437829	5169	42,57	1,0	13,16	1,0	153	149	1	1	0.976,1.0	0.927,1.0	0.024
5170	ENSG00000276234.6	TADA2A	chr17	+	37442563	37442652	37442569	37442652	37440504	37440662	5170	78,100	0,1	28,22	0,0	155	149	1	1	1.0,0.99	1.0,1.0	-0.005
5171	ENSG00000278619.6	MRM1	chr17	+	36607883	36608018	36607898	36608018	36607669	36607802	5171	0,0	18,9	1,5	0,2	164	149	3.04004e-08	8.25461e-07	0.0,0.0	1.0,0.694	-0.847
5172	ENSG00000278259.6	MYO19	chr17	-	36498265	36498577	36498265	36498559	36499074	36499160	5172	0,2	67,34	2,0	28,18	167	149	0.479531	1	0.0,0.05	0.06,0.0	-0.005
5173	ENSG00000278259.6	MYO19	chr17	-	36501851	36501961	36501851	36501901	36503096	36503200	5173	8,5	0,0	4,7	1,0	209	149	1	1	1.0,1.0	0.74,1.0	0.13
5174	ENSG00000278259.6	MYO19	chr17	-	36503949	36505177	36503949	36504020	36505296	36505404	5174	22,10	143,109	34,47	25,31	298	149	0	0	0.071,0.044	0.405,0.431	-0.361
5176	ENSG00000278259.6	MYO19	chr17	-	36510745	36510977	36510745	36510917	36511364	36511455	5176	6,6	84,68	19,28	17,15	209	149	1.55431e-15	1.45945e-13	0.048,0.059	0.443,0.571	-0.454
5177	ENSG00000273611.6	ZNHIT3	chr17	+	36492812	36492899	36492817	36492899	36486934	36486966	5177	111,138	0,2	6,11	0,0	154	149	1	1	1.0,0.985	1.0,1.0	-0.008
5179	ENSG00000184009.14	ACTG1	chr17	-	81510926	81511123	81510926	81511108	81511187	81511626	5179	85,68	4784,3005	0,4	117,112	164	149	0.275143	0.73368	0.016,0.02	0.0,0.031	0.003
5180	ENSG00000184009.14	ACTG1	chr17	-	81511187	81511614	81511187	81511578	81511902	81512142	5180	2039,1211	21,20	69,59	3,1	185	149	0.611376	1	0.987,0.98	0.949,0.979	0.02
5181	ENSG00000184009.14	ACTG1	chr17	-	81511187	81511626	81511187	81511578	81511902	81512142	5181	7131,4296	21,20	195,217	3,1	197	149	1	1	0.996,0.994	0.98,0.994	0.008
5182	ENSG00000184009.14	ACTG1	chr17	-	81511187	81511803	81511187	81511578	81511902	81512142	5182	2544,1527	21,20	124,118	3,1	298	149	0.559395	1	0.984,0.974	0.954,0.983	0.011
5185	ENSG00000184009.14	ACTG1	chr17	-	81511187	81511803	81511187	81511626	81511902	81512142	5185	93,67	4654,2820	48,51	107,132	298	149	0	0	0.01,0.012	0.183,0.162	-0.161
5191	ENSG00000184009.14	ACTG1	chr17	-	81511902	81512115	81511902	81512061	81512231	81512360	5191	4044,3647	0,2	157,125	0,0	203	149	1	1	1.0,0.999	1.0,1.0	0
5192	ENSG00000184009.14	ACTG1	chr17	-	81511902	81512118	81511902	81512061	81512231	81512360	5192	4196,3782	0,2	164,131	0,0	206	149	1	1	1.0,0.999	1.0,1.0	0
5193	ENSG00000184009.14	ACTG1	chr17	-	81511902	81512142	81511902	81512061	81512231	81512360	5193	18844,15036	0,2	592,468	0,0	230	149	1	1	1.0,1.0	1.0,1.0	0
5194	ENSG00000184009.14	ACTG1	chr17	-	81511902	81512118	81511902	81512115	81512231	81512360	5194	155,136	3,1	7,6	0,0	152	149	0.781946	1	0.981,0.993	1.0,1.0	-0.013
5195	ENSG00000184009.14	ACTG1	chr17	-	81511902	81512142	81511902	81512115	81512231	81512360	5195	14803,11394	3,1	435,343	0,0	176	149	1	1	1.0,1.0	1.0,1.0	0
5196	ENSG00000184009.14	ACTG1	chr17	-	81511902	81512142	81511902	81512118	81512231	81512360	5196	14686,11272	38,14	431,338	3,1	173	149	1	1	0.997,0.999	0.992,0.997	0.004
5211	ENSG00000270647.8	TAF15	chr17	+	35820331	35820437	35820342	35820437	35820163	35820248	5211	442,578	2,0	137,98	1,2	160	149	1	1	0.995,1.0	0.992,0.979	0.012
5213	ENSG00000270647.8	TAF15	chr17	+	35842366	35842459	35842372	35842459	35838423	35838553	5213	206,437	1,0	109,115	0,0	155	149	1	1	0.995,1.0	1.0,1.0	-0.002
5215	ENSG00000006125.19	AP2B1	chr17	+	35593985	35594067	35594007	35594067	35587415	35587597	5215	2,6	11,19	0,1	2,7	171	149	0.0073122	0.0409174	0.137,0.216	0.0,0.111	0.121
5218	ENSG00000006125.19	AP2B1	chr17	+	35608141	35608387	35608255	35608387	35605704	35605840	5218	633,463	1,0	61,61	0,0	263	149	1	1	0.997,1.0	1.0,1.0	-0.002
5219	ENSG00000006125.19	AP2B1	chr17	+	35650529	35650789	35650602	35650789	35641876	35641975	5219	539,439	0,2	54,50	0,0	222	149	1	1	1.0,0.993	1.0,1.0	-0.004
5221	ENSG00000167925.18	GHDC	chr17	-	42190184	42190359	42190184	42190270	42190623	42190757	5221	14,13	13,3	6,10	0,0	238	149	3.10209e-06	5.31776e-05	0.403,0.731	1.0,1.0	-0.433
5222	ENSG00000167925.18	GHDC	chr17	-	42192905	42193101	42192905	42193027	42193316	42193594	5222	2,0	23,12	1,6	1,2	223	149	1.84343e-05	0.000251074	0.055,0.0	0.401,0.667	-0.507
5227	ENSG00000092871.18	RFFL	chr17	-	35021370	35021784	35021370	35021781	35026373	35026561	5227	2,0	12,2	0,0	2,1	152	149	0.556722	1	0.14,0.0	0.0,0.0	0.07
5228	ENSG00000005156.13	LIG3	chr17	+	34991670	34991837	34991728	34991837	34989465	34989663	5228	65,75	0,1	14,9	0,0	207	149	1	1	1.0,0.982	1.0,1.0	-0.009
5230	ENSG00000005156.13	LIG3	chr17	+	34991670	34991837	34991728	34991837	34990962	34991114	5230	248,226	0,1	22,22	0,0	207	149	1	1	1.0,0.994	1.0,1.0	-0.003
5231	ENSG00000005156.13	LIG3	chr17	+	34991709	34991837	34991728	34991837	34990962	34991114	5231	11,13	0,1	1,0	0,0	168	149	1	1	1.0,0.92	1.0,NA	-0.04
5232	ENSG00000235590.10	GNAS-AS1	chr20	-	58841936	58842229	58841936	58842216	58842432	58842545	5232	2,1	4,4	1,0	0,0	162	149	1	1	0.315,0.187	1.0,NA	-0.749
5234	ENSG00000006042.13	TMEM98	chr17	+	32931474	32931659	32931480	32931659	32931326	32931402	5234	103,61	5,3	0,2	0,0	155	149	1	1	0.952,0.951	NA,1.0	-0.048
5235	ENSG00000108671.12	PSMD11	chr17	+	32464048	32464120	32464054	32464120	32454494	32454619	5235	388,360	0,2	22,19	2,0	155	149	0.457587	1	1.0,0.994	0.914,1.0	0.04
5239	ENSG00000108671.12	PSMD11	chr17	+	32477520	32477583	32477547	32477583	32474763	32474824	5239	712,679	6,9	47,35	0,0	176	149	0.938491	1	0.99,0.985	1.0,1.0	-0.012
5240	ENSG00000108671.12	PSMD11	chr17	+	32480488	32480631	32480539	32480631	32480145	32480197	5240	530,561	2,0	42,36	0,0	200	149	1	1	0.995,1.0	1.0,1.0	-0.002
5241	ENSG00000108671.12	PSMD11	chr17	+	32480488	32480631	32480542	32480631	32480145	32480197	5241	540,574	0,1	42,36	0,0	203	149	1	1	1.0,0.998	1.0,1.0	-0.001
5243	ENSG00000108671.12	PSMD11	chr17	+	32480752	32482380	32481307	32482380	32480488	32480631	5243	731,1010	0,4	74,61	0,2	298	149	0.397954	0.953651	1.0,0.992	1.0,0.938	0.027
5244	ENSG00000108671.12	PSMD11	chr17	+	32480752	32482380	32482224	32482380	32480488	32480631	5244	328,392	1,0	20,37	0,0	298	149	1	1	0.994,1.0	1.0,1.0	-0.003
5246	ENSG00000108671.12	PSMD11	chr17	+	32481307	32482380	32482224	32482380	32480488	32480631	5246	102,143	1,0	11,30	0,0	298	149	1	1	0.981,1.0	1.0,1.0	-0.01
5253	ENSG00000181481.15	RNF135	chr17	+	30987943	30988106	30987985	30988106	30984616	30984760	5253	18,10	0,0	5,3	0,2	191	149	0.540926	1	1.0,1.0	1.0,0.539	0.23
5254	ENSG00000172171.12	TEFM	chr17	-	30900412	30900562	30900412	30900521	30904065	30904529	5254	28,13	2,2	3,6	0,0	190	149	0.0263577	0.116812	0.917,0.836	1.0,1.0	-0.123
5255	ENSG00000172171.12	TEFM	chr17	-	30904065	30904529	30904065	30904358	30906167	30906235	5255	104,122	1,0	23,35	0,0	298	149	1	1	0.981,1.0	1.0,1.0	-0.01
5256	ENSG00000108587.17	GOSR1	chr17	+	30490092	30490217	30490125	30490217	30484662	30484770	5256	1,3	106,161	1,2	14,23	182	149	0.791239	1	0.008,0.015	0.055,0.066	-0.049
5258	ENSG00000108587.17	GOSR1	chr17	+	30510879	30510909	30510884	30510909	30492678	30492753	5258	64,47	0,0	11,6	0,1	154	149	1	1	1.0,1.0	1.0,0.853	0.074
5261	ENSG00000108106.15	UBE2S	chr19	-	55404287	55404478	55404287	55404401	55406814	55406962	5261	1904,1062	5,0	30,48	0,0	226	149	1	1	0.996,1.0	1.0,1.0	-0.002
5264	ENSG00000167549.20	CORO6	chr17	-	29614761	29615857	29614761	29615854	29615944	29616175	5264	1,0	6,1	0,5	2,9	152	149	0.01113	0.0573806	0.14,0.0	0.0,0.353	-0.106
5269	ENSG00000167549.20	CORO6	chr17	-	29621223	29621484	29621223	29621423	29622687	29622909	5269	14,10	1,0	4,5	0,1	210	149	1	1	0.909,1.0	1.0,0.78	0.065
5270	ENSG00000108262.17	GIT1	chr17	-	29573474	29574935	29573474	29574914	29575078	29575142	5270	12,11	228,167	4,4	16,28	170	149	0.0745558	0.269319	0.044,0.055	0.18,0.111	-0.096
5271	ENSG00000108262.17	GIT1	chr17	-	29573474	29574947	29573474	29574914	29575078	29575142	5271	11,6	228,167	4,5	16,28	182	149	0.00699861	0.0394797	0.038,0.029	0.17,0.128	-0.116
5272	ENSG00000108262.17	GIT1	chr17	-	29573474	29574947	29573474	29574935	29575078	29575142	5272	1,0	2,5	0,1	0,0	161	149	1	1	0.316,0.0	NA,1.0	-0.842
5273	ENSG00000108262.17	GIT1	chr17	-	29575078	29575160	29575078	29575142	29575287	29575470	5273	8,1	138,93	1,1	11,18	167	149	0.47679	1	0.049,0.01	0.075,0.047	-0.032
5275	ENSG00000108262.17	GIT1	chr17	-	29575811	29575898	29575811	29575829	29576077	29576131	5275	157,75	2,0	12,9	0,0	218	149	1	1	0.982,1.0	1.0,1.0	-0.009
5276	ENSG00000108262.17	GIT1	chr17	-	29575811	29575916	29575811	29575829	29576077	29576131	5276	36,16	2,0	7,1	0,0	236	149	0.362752	0.896349	0.919,1.0	1.0,1.0	-0.04
5277	ENSG00000108262.17	GIT1	chr17	-	29575811	29575916	29575811	29575898	29576077	29576131	5277	2,0	123,59	2,0	7,8	167	149	0.808305	1	0.014,0.0	0.203,0.0	-0.095
5278	ENSG00000108262.17	GIT1	chr17	-	29576219	29576450	29576219	29576435	29576521	29576674	5278	119,118	2,0	4,6	0,0	164	149	1	1	0.982,1.0	1.0,1.0	-0.009
5279	ENSG00000108262.17	GIT1	chr17	-	29576521	29576704	29576521	29576674	29576862	29576996	5279	5,0	82,40	0,1	12,4	179	149	0.260988	0.70573	0.048,0.0	0.0,0.172	-0.062
5286	ENSG00000173065.15	FAM222B	chr17	-	28755979	28759876	28755979	28759764	28766585	28766707	5286	137,210	18,36	42,41	4,4	261	149	0.124077	0.398548	0.813,0.769	0.857,0.854	-0.065
5287	ENSG00000173065.15	FAM222B	chr17	-	28790377	28790443	28790377	28790425	28834292	28834326	5287	1,4	4,8	1,1	0,1	167	149	0.00426577	0.0263291	0.182,0.308	1.0,0.472	-0.491
5289	ENSG00000109113.21	RAB34	chr17	-	28714792	28714942	28714792	28714900	28715031	28715122	5289	10,6	170,105	2,1	4,3	191	149	0.502337	1	0.044,0.043	0.281,0.206	-0.2
5291	ENSG00000109113.21	RAB34	chr17	-	28715194	28715276	28715194	28715214	28715455	28715507	5291	165,95	0,1	8,11	0,0	211	149	1	1	1.0,0.985	1.0,1.0	-0.008
5292	ENSG00000109113.21	RAB34	chr17	-	28715992	28716061	28715992	28716058	28716902	28716994	5292	14,8	131,75	0,2	0,13	152	149	1	1	0.095,0.095	NA,0.131	-0.036
5294	ENSG00000109113.21	RAB34	chr17	-	28717212	28717398	28717212	28717291	28718121	28718167	5294	75,35	4,0	2,12	0,0	256	149	0.118661	0.38463	0.916,1.0	1.0,1.0	-0.042
5295	ENSG00000109113.21	RAB34	chr17	-	28717212	28717425	28717212	28717291	28718121	28718167	5295	94,44	4,0	4,12	0,0	283	149	0.140559	0.439747	0.925,1.0	1.0,1.0	-0.037
5296	ENSG00000109113.21	RAB34	chr17	-	28717212	28717620	28717212	28717291	28718121	28718167	5296	94,39	4,0	4,12	0,0	298	149	0.121002	0.390565	0.922,1.0	1.0,1.0	-0.039
5297	ENSG00000109113.21	RAB34	chr17	-	28717212	28717647	28717212	28717291	28718121	28718167	5297	94,39	4,0	4,12	0,0	298	149	0.121002	0.390565	0.922,1.0	1.0,1.0	-0.039
5298	ENSG00000109113.21	RAB34	chr17	-	28717212	28717425	28717212	28717398	28718121	28718167	5298	22,9	3,0	2,0	0,0	176	149	1	1	0.861,1.0	1.0,NA	-0.07
5299	ENSG00000109113.21	RAB34	chr17	-	28717212	28717620	28717212	28717398	28718121	28718167	5299	68,19	3,0	4,2	0,0	298	149	0.457841	1	0.919,1.0	1.0,1.0	-0.04
5300	ENSG00000109113.21	RAB34	chr17	-	28717212	28717647	28717212	28717398	28718121	28718167	5300	68,19	3,0	4,2	0,0	298	149	0.457841	1	0.919,1.0	1.0,1.0	-0.04
5301	ENSG00000109113.21	RAB34	chr17	-	28717212	28717620	28717212	28717425	28718121	28718167	5301	57,18	4,7	2,4	0,0	298	149	0.000196384	0.00196481	0.877,0.562	1.0,1.0	-0.28
5302	ENSG00000109113.21	RAB34	chr17	-	28717212	28717647	28717212	28717425	28718121	28718167	5302	57,18	4,7	2,4	0,0	298	149	0.000196384	0.00196481	0.877,0.562	1.0,1.0	-0.28
5304	ENSG00000109113.21	RAB34	chr17	-	28717212	28717593	28717212	28717425	28718121	28718176	5304	58,18	4,7	2,4	0,0	298	149	0.00020231	0.00201673	0.879,0.562	1.0,1.0	-0.279
5305	ENSG00000109113.21	RAB34	chr17	-	28717212	28717593	28717212	28717291	28718121	28718183	5305	95,39	4,0	4,12	0,0	298	149	0.121658	0.392096	0.922,1.0	1.0,1.0	-0.039
5306	ENSG00000109113.21	RAB34	chr17	-	28717212	28717593	28717212	28717398	28718121	28718183	5306	69,19	3,0	4,2	0,0	298	149	0.47043	1	0.92,1.0	1.0,1.0	-0.04
5309	ENSG00000109113.21	RAB34	chr17	-	28717212	28717593	28717212	28717425	28718369	28718518	5309	59,18	1,0	2,4	0,0	298	149	1	1	0.967,1.0	1.0,1.0	-0.016
5312	ENSG00000007202.17	BLTP2	chr17	-	28631478	28631681	28631478	28631678	28631819	28631919	5312	515,379	34,11	118,107	7,7	152	149	0.789502	1	0.937,0.971	0.943,0.937	0.014
5313	ENSG00000007202.17	BLTP2	chr17	-	28640559	28640683	28640559	28640627	28642027	28642078	5313	206,202	0,1	54,56	0,0	205	149	1	1	1.0,0.993	1.0,1.0	-0.004
5321	ENSG00000076382.18	SPAG5	chr17	-	28580008	28580144	28580008	28580120	28583510	28583649	5321	4,1	121,108	2,0	28,23	173	149	0.600056	1	0.028,0.008	0.058,0.0	-0.011
5322	ENSG00000076382.18	SPAG5	chr17	-	28591981	28592477	28591981	28592474	28598509	28598635	5322	4,0	4,3	0,1	1,0	152	149	0.125949	0.403049	0.495,0.0	0.0,1.0	-0.253
5323	ENSG00000076382.18	SPAG5	chr17	-	28591981	28593066	28591981	28592474	28598509	28598635	5323	304,245	4,3	63,86	1,0	298	149	0.201556	0.579617	0.974,0.976	0.969,1.0	-0.009
5324	ENSG00000076382.18	SPAG5	chr17	-	28591981	28593066	28591981	28592477	28598509	28598635	5324	303,247	3,0	63,86	0,1	298	149	1	1	0.981,1.0	1.0,0.977	0.002
5331	ENSG00000004139.15	SARM1	chr17	+	28388122	28388276	28388173	28388276	28385099	28385275	5331	4,0	6,11	1,1	0,0	200	149	6.95532e-08	1.76048e-06	0.332,0.0	1.0,1.0	-0.834
5332	ENSG00000004139.15	SARM1	chr17	+	28388349	28388539	28388359	28388539	28388173	28388276	5332	23,17	0,1	1,5	0,0	159	149	1	1	1.0,0.941	1.0,1.0	-0.03
5333	ENSG00000004139.15	SARM1	chr17	+	28396123	28398163	28396156	28398163	28395904	28396026	5333	4,2	73,38	3,7	15,9	182	149	0.00110372	0.0086456	0.043,0.041	0.141,0.389	-0.223
5334	ENSG00000244045.14	VMA12	chr17	+	28360528	28360847	28360734	28360847	28359314	28359404	5334	129,72	2,0	18,18	0,0	298	149	0.864912	1	0.97,1.0	1.0,1.0	-0.015
5335	ENSG00000004142.13	POLDIP2	chr17	-	28350437	28350626	28350437	28350563	28350765	28350792	5335	8,9	334,292	3,2	14,14	212	149	0.05564	0.213663	0.017,0.021	0.131,0.091	-0.092
5337	ENSG00000004142.13	POLDIP2	chr17	-	28351663	28351854	28351663	28351800	28352911	28353019	5337	10,3	296,241	1,4	15,14	203	149	0.039176	0.161246	0.024,0.009	0.047,0.173	-0.093
5339	ENSG00000004142.13	POLDIP2	chr17	-	28354487	28354585	28354487	28354531	28355794	28355876	5339	450,298	12,6	20,30	0,1	203	149	0.0805763	0.286725	0.965,0.973	1.0,0.957	-0.009
5342	ENSG00000109083.15	IFT20	chr17	-	28332145	28332723	28332145	28332382	28335339	28335455	5342	1,15	28,29	6,3	1,6	298	149	0.0584573	0.222719	0.018,0.205	0.75,0.2	-0.363
5357	ENSG00000109046.16	WSB1	chr17	+	27301787	27301956	27301880	27301956	27294113	27294435	5357	202,201	2,0	69,46	0,0	242	149	1	1	0.984,1.0	1.0,1.0	-0.008
5358	ENSG00000109046.16	WSB1	chr17	+	27307743	27309272	27309099	27309272	27306781	27306882	5358	20,28	81,79	23,43	5,22	298	149	1.92852e-09	6.91321e-08	0.11,0.151	0.697,0.494	-0.465
5360	ENSG00000177885.16	GRB2	chr17	-	75318075	75320553	75318075	75320550	75321658	75321827	5360	188,215	7,2	8,12	0,0	152	149	0.194916	0.564539	0.963,0.991	1.0,1.0	-0.023
5361	ENSG00000177885.16	GRB2	chr17	-	75318077	75320550	75318077	75320511	75321658	75321827	5361	106,104	2,2	9,8	0,0	188	149	0.570622	1	0.977,0.976	1.0,1.0	-0.024
5362	ENSG00000177885.16	GRB2	chr17	-	75320010	75320553	75320010	75320511	75321658	75321827	5362	287,317	2,2	17,20	0,0	191	149	1	1	0.991,0.992	1.0,1.0	-0.008
5363	ENSG00000177885.16	GRB2	chr17	-	75321658	75321857	75321658	75321827	75325897	75326020	5363	2,3	168,141	0,4	12,6	179	149	0.043626	0.175784	0.01,0.017	0.0,0.357	-0.165
5376	ENSG00000108599.16	AKAP10	chr17	-	19958013	19958571	19958013	19958567	19962839	19963022	5376	39,51	0,0	26,27	2,0	153	149	0.422145	0.991271	1.0,1.0	0.927,1.0	0.036
5377	ENSG00000108599.16	AKAP10	chr17	-	19962839	19962966	19962839	19962959	19968413	19968461	5377	6,2	1,0	3,1	0,0	156	149	1	1	0.851,1.0	1.0,1.0	-0.075
5378	ENSG00000108599.16	AKAP10	chr17	-	19962839	19962991	19962839	19962959	19968413	19968461	5378	14,21	1,0	12,14	0,0	181	149	1	1	0.92,1.0	1.0,1.0	-0.04
5379	ENSG00000108599.16	AKAP10	chr17	-	19962839	19963022	19962839	19962959	19968413	19968461	5379	93,79	1,0	28,33	0,0	212	149	1	1	0.985,1.0	1.0,1.0	-0.008
5380	ENSG00000108599.16	AKAP10	chr17	-	19962839	19962991	19962839	19962966	19968413	19968461	5380	11,19	3,0	9,13	0,0	174	149	0.221536	0.620559	0.758,1.0	1.0,1.0	-0.121
5381	ENSG00000108599.16	AKAP10	chr17	-	19962839	19963022	19962839	19962966	19968413	19968461	5381	90,77	3,0	25,32	0,0	205	149	0.45778	1	0.956,1.0	1.0,1.0	-0.022
5382	ENSG00000108599.16	AKAP10	chr17	-	19962839	19963022	19962839	19962991	19968413	19968461	5382	80,60	1,2	16,22	0,3	180	149	0.555659	1	0.985,0.961	1.0,0.859	0.043
5386	ENSG00000083290.21	ULK2	chr17	-	19826138	19826186	19826138	19826183	19838500	19838583	5386	22,35	0,4	14,15	0,0	152	149	0.125504	0.402067	1.0,0.896	1.0,1.0	-0.052
5393	ENSG00000273018.8	FAM106A	chr17	-	18605779	18606709	18605779	18606619	18607896	18607967	5393	1,2	1,10	0,2	3,2	239	149	0.493299	1	0.384,0.111	0.0,0.384	0.055
5408	ENSG00000177731.17	FLII	chr17	-	18246912	18247085	18246912	18247052	18247168	18247357	5408	3,3	125,99	0,2	19,13	182	149	0.567648	1	0.019,0.024	0.0,0.112	-0.035
5409	ENSG00000177731.17	FLII	chr17	-	18247656	18247848	18247656	18247842	18247928	18248033	5409	129,102	1,0	5,18	0,0	155	149	1	1	0.992,1.0	1.0,1.0	-0.004
5410	ENSG00000177731.17	FLII	chr17	-	18247656	18247863	18247656	18247842	18247928	18248033	5410	5,4	1,0	2,1	0,0	170	149	1	1	0.814,1.0	1.0,1.0	-0.093
5411	ENSG00000177731.17	FLII	chr17	-	18247656	18247863	18247656	18247848	18247928	18248033	5411	0,1	124,99	0,0	3,17	164	149	1	1	0.0,0.009	0.0,0.0	0.004
5413	ENSG00000177731.17	FLII	chr17	-	18249126	18249222	18249126	18249201	18249325	18249408	5413	3,1	266,220	1,0	45,44	170	149	1	1	0.01,0.004	0.019,0.0	-0.002
5415	ENSG00000177731.17	FLII	chr17	-	18251264	18251477	18251264	18251474	18251679	18251813	5415	45,19	3,4	11,15	0,0	152	149	0.00203412	0.0143502	0.936,0.823	1.0,1.0	-0.121
5416	ENSG00000177731.17	FLII	chr17	-	18251679	18251816	18251679	18251813	18251998	18252053	5416	115,93	125,79	8,14	12,3	152	149	0.408659	0.970723	0.474,0.536	0.395,0.821	-0.103
5418	ENSG00000177731.17	FLII	chr17	-	18254520	18254682	18254520	18254619	18254768	18254854	5418	590,597	2,4	104,82	0,1	212	149	1	1	0.995,0.991	1.0,0.983	0.001
5419	ENSG00000177731.17	FLII	chr17	-	18256908	18257126	18256908	18257019	18258627	18258705	5419	4,10	224,170	3,0	29,32	256	149	0.672112	1	0.01,0.033	0.057,0.0	-0.007
5420	ENSG00000131899.14	LLGL1	chr17	+	18234272	18234408	18234275	18234408	18234012	18234175	5420	114,80	30,5	8,12	6,2	152	149	0.249879	0.6827	0.788,0.94	0.567,0.855	0.153
5421	ENSG00000131899.14	LLGL1	chr17	+	18234838	18234993	18234859	18234993	18234648	18234703	5421	103,65	1,0	17,17	0,0	170	149	1	1	0.989,1.0	1.0,1.0	-0.006
5422	ENSG00000131899.14	LLGL1	chr17	+	18238455	18238609	18238461	18238609	18238066	18238214	5422	88,70	8,13	13,9	2,4	155	149	0.440691	1	0.914,0.838	0.862,0.684	0.103
5423	ENSG00000131899.14	LLGL1	chr17	+	18242165	18242278	18242171	18242278	18241884	18241999	5423	168,140	12,3	24,35	3,0	155	149	0.41399	0.977961	0.931,0.978	0.885,1.0	0.012
5424	ENSG00000131899.14	LLGL1	chr17	+	18242447	18242628	18242507	18242628	18242165	18242278	5424	5,3	126,133	3,0	23,23	209	149	0.773184	1	0.028,0.016	0.085,0.0	-0.021
5431	ENSG00000108591.11	DRG2	chr17	+	18099632	18100435	18100362	18100435	18099016	18099093	5431	19,14	2,1	34,24	0,0	298	149	0.204449	0.584703	0.826,0.875	1.0,1.0	-0.149
5432	ENSG00000108591.11	DRG2	chr17	+	18100362	18100435	18100378	18100435	18099632	18099715	5432	9,12	0,3	5,4	0,0	165	149	0.177838	0.525913	1.0,0.783	1.0,1.0	-0.109
5433	ENSG00000108591.11	DRG2	chr17	+	18100568	18100659	18100574	18100659	18100362	18100435	5433	103,104	2,1	27,34	0,0	155	149	0.908954	1	0.98,0.99	1.0,1.0	-0.015
5434	ENSG00000108591.11	DRG2	chr17	+	18101450	18101590	18101492	18101590	18100568	18100659	5434	1,3	158,152	5,4	31,39	191	149	0.000286274	0.00273747	0.005,0.015	0.112,0.074	-0.083
5435	ENSG00000108591.11	DRG2	chr17	+	18101450	18101590	18101494	18101590	18100568	18100659	5435	6,8	0,2	7,5	1,2	193	149	0.25574	0.694241	1.0,0.755	0.844,0.659	0.126
5436	ENSG00000108591.11	DRG2	chr17	+	18101492	18101590	18101494	18101590	18100568	18100659	5436	163,157	0,2	33,40	1,2	151	149	0.466249	1	1.0,0.987	0.97,0.952	0.033
5437	ENSG00000108591.11	DRG2	chr17	+	18103764	18103889	18103800	18103889	18101920	18101997	5437	5,3	97,99	1,2	12,17	185	149	0.545796	1	0.04,0.024	0.063,0.087	-0.043
5438	ENSG00000108591.11	DRG2	chr17	+	18104559	18104681	18104622	18104681	18103800	18103889	5438	1,3	160,163	0,4	13,26	212	149	0.148243	0.457922	0.004,0.013	0.0,0.098	-0.041
5453	ENSG00000175662.20	TOM1L2	chr17	-	17869339	17869914	17869339	17869473	17879626	17879743	5453	1,3	22,16	8,2	7,7	298	149	0.00449609	0.0274942	0.022,0.086	0.364,0.125	-0.191
5454	ENSG00000141030.14	COPS3	chr17	-	17254858	17254945	17254858	17254920	17261599	17261692	5454	30,39	0,1	2,2	0,0	174	149	1	1	1.0,0.971	1.0,1.0	-0.014
5455	ENSG00000141030.14	COPS3	chr17	-	17267884	17268045	17267884	17267977	17270757	17270807	5455	12,11	462,547	17,11	37,14	217	149	0	0	0.018,0.014	0.24,0.35	-0.279
5456	ENSG00000141030.14	COPS3	chr17	-	17276034	17276183	17276034	17276164	17281131	17281246	5456	37,14	371,218	0,3	31,15	168	149	0.141718	0.44261	0.081,0.054	0.0,0.151	-0.008
5457	ENSG00000154803.14	FLCN	chr17	-	17227888	17228821	17227888	17228161	17231793	17231882	5457	13,5	67,41	24,17	6,10	298	149	1.60912e-10	6.92872e-09	0.088,0.057	0.667,0.459	-0.491
5458	ENSG00000154803.14	FLCN	chr17	-	17227888	17228905	17227888	17228161	17231793	17231882	5458	13,5	67,41	24,17	6,10	298	149	1.60912e-10	6.92872e-09	0.088,0.057	0.667,0.459	-0.491
5469	ENSG00000187688.15	TRPV2	chr17	+	16434858	16434969	16434889	16434969	16433573	16433698	5469	0,0	0,1	1,0	0,0	180	149	1	1	NA,0.0	1.0,NA	-1
5470	ENSG00000166582.12	CENPV	chr17	-	16348615	16348685	16348615	16348679	16349930	16350029	5470	280,232	0,1	14,4	0,0	155	149	1	1	1.0,0.996	1.0,1.0	-0.002
5471	ENSG00000166582.12	CENPV	chr17	-	16348615	16349333	16348615	16348679	16349930	16350029	5471	529,397	0,1	42,79	0,0	298	149	1	1	1.0,0.995	1.0,1.0	-0.002
5472	ENSG00000166582.12	CENPV	chr17	-	16348615	16349333	16348615	16348685	16349930	16350029	5472	516,380	263,214	38,78	10,3	298	149	0.00013472	0.00141875	0.495,0.47	0.655,0.929	-0.31
5474	ENSG00000122126.19	OCRL	chrX	+	129540743	129540823	129540747	129540823	129540368	129540478	5474	93,37	1,4	17,9	0,1	153	149	0.191405	0.556697	0.989,0.9	1.0,0.898	-0.005
5475	ENSG00000122126.19	OCRL	chrX	+	129548562	129548601	129548565	129548601	129544957	129545037	5475	81,67	3,1	18,32	1,0	152	149	1	1	0.964,0.985	0.946,1.0	0.001
5482	ENSG00000187607.17	ZNF286A	chr17	+	15700047	15700366	15700134	15700366	15699576	15699777	5482	36,13	2,3	7,1	1,2	236	149	0.273805	0.730654	0.919,0.732	0.815,0.24	0.298
5483	ENSG00000187607.17	ZNF286A	chr17	+	15715999	15720787	15716058	15720787	15708154	15708247	5483	63,89	34,16	10,15	0,1	208	149	6.72462e-05	0.000771238	0.57,0.799	1.0,0.915	-0.273
5487	ENSG00000221926.14	TRIM16	chr17	-	15651090	15651946	15651090	15651941	15677175	15677280	5487	6,2	0,2	2,3	0,0	154	149	0.452248	1	1.0,0.492	1.0,1.0	-0.254
5488	ENSG00000221926.14	TRIM16	chr17	-	15677175	15677280	15677175	15677277	15677574	15677721	5488	25,20	6,2	9,11	1,2	152	149	0.698107	1	0.803,0.907	0.898,0.844	-0.016
5491	ENSG00000221926.14	TRIM16	chr17	-	15682853	15682964	15682853	15682951	15683035	15683157	5491	5,0	32,59	1,1	15,13	162	149	0.381626	0.928018	0.126,0.0	0.058,0.066	0.001
5492	ENSG00000221926.14	TRIM16	chr17	-	15683035	15683371	15683035	15683157	15684195	15684311	5492	26,25	29,29	16,21	3,3	298	149	2.99646e-06	5.14274e-05	0.31,0.301	0.727,0.778	-0.447
5494	ENSG00000142168.16	SOD1	chr21	+	31663789	31663886	31663794	31663886	31659692	31659841	5494	649,984	2,0	21,20	0,0	154	149	1	1	0.997,1.0	1.0,1.0	-0.002
5495	ENSG00000142168.16	SOD1	chr21	+	31666448	31666518	31666463	31666518	31663789	31663886	5495	1288,1654	7,12	48,30	2,0	164	149	0.425491	0.996074	0.994,0.992	0.956,1.0	0.015
5500	ENSG00000236088.13	COX10-DT	chr17	-	13892724	13892842	13892724	13892839	14034007	14034416	5500	0,2	0,1	1,0	0,1	152	149	1	1	NA,0.662	1.0,0.0	0.162
5503	ENSG00000187824.10	TMEM220	chr17	-	10723269	10723365	10723269	10723329	10725010	10725134	5503	1,2	12,21	0,0	1,0	185	149	1	1	0.063,0.071	0.0,NA	0.067
5504	ENSG00000187824.10	TMEM220	chr17	-	10725010	10725149	10725010	10725134	10726203	10726264	5504	0,1	26,25	0,0	5,3	164	149	1	1	0.0,0.035	0.0,0.0	0.018
5505	ENSG00000133028.13	SCO1	chr17	-	10691871	10691999	10691871	10691964	10692763	10692961	5505	2,3	74,82	0,2	15,22	184	149	0.856535	1	0.021,0.029	0.0,0.069	-0.01
5512	ENSG00000170310.16	STX8	chr17	-	9491828	9491921	9491828	9491916	9505037	9505162	5512	59,43	0,0	22,14	0,1	154	149	1	1	1.0,1.0	1.0,0.931	0.034
5513	ENSG00000170310.16	STX8	chr17	-	9491828	9491921	9491828	9491916	9545171	9545282	5513	4,1	2,0	2,2	0,0	154	149	0.65596	1	0.659,1.0	1.0,1.0	-0.17
5516	ENSG00000133026.15	MYH10	chr17	-	8576642	8576672	8576642	8576669	8577235	8577338	5516	5,9	1,2	1,1	0,0	152	149	0.0546224	0.210311	0.831,0.815	1.0,1.0	-0.177
5517	ENSG00000133026.15	MYH10	chr17	-	8576642	8576831	8576642	8576669	8577235	8577338	5517	3,0	1,2	12,12	0,0	298	149	0.000297207	0.00282715	0.6,0.0	1.0,1.0	-0.7
5518	ENSG00000133026.15	MYH10	chr17	-	8576642	8576831	8576642	8576672	8577235	8577338	5518	3,0	5,9	11,11	0,0	298	149	7.32747e-13	4.67737e-11	0.231,0.0	1.0,1.0	-0.884
5519	ENSG00000133026.15	MYH10	chr17	-	8622901	8623277	8622901	8623275	8630653	8630725	5519	176,289	2,0	38,38	0,0	151	149	1	1	0.989,1.0	1.0,1.0	-0.006
5520	ENSG00000161970.16	RPL26	chr17	-	8377518	8377716	8377518	8377692	8379795	8379936	5520	7,16	2970,5923	0,2	163,120	173	149	1	1	0.002,0.002	0.0,0.014	-0.005
5524	ENSG00000161970.16	RPL26	chr17	-	8379795	8379888	8379795	8379846	8382142	8382315	5524	1659,3714	11,11	110,74	0,3	191	149	0.500155	1	0.992,0.996	1.0,0.951	0.018
5525	ENSG00000161970.16	RPL26	chr17	-	8379795	8379936	8379795	8379846	8382142	8382315	5525	10232,13278	11,11	363,300	0,3	239	149	1	1	0.998,0.999	1.0,0.984	0.006
5526	ENSG00000161970.16	RPL26	chr17	-	8379795	8379936	8379795	8379888	8382142	8382315	5526	8590,9591	12,14	255,227	0,0	197	149	1	1	0.998,0.998	1.0,1.0	-0.002
5528	ENSG00000161970.16	RPL26	chr17	-	8382142	8382336	8382142	8382315	8383156	8383193	5528	474,414	3345,2941	15,12	80,112	170	149	0.833007	1	0.11,0.11	0.141,0.086	-0.003
5532	ENSG00000220205.11	VAMP2	chr17	-	8161607	8161919	8161607	8161766	8162248	8162369	5532	13,1	79,46	1,7	13,6	298	149	0.100376	0.340451	0.076,0.011	0.037,0.368	-0.159
5533	ENSG00000170037.15	CNTROB	chr17	+	7934988	7935145	7935021	7935145	7934464	7934546	5533	134,119	0,0	29,23	0,1	182	149	1	1	1.0,1.0	1.0,0.95	0.025
5534	ENSG00000170037.15	CNTROB	chr17	+	7936237	7936482	7936365	7936482	7934988	7935145	5534	17,21	88,55	46,27	18,17	277	149	1.73346e-11	8.94636e-10	0.094,0.17	0.579,0.461	-0.388
5536	ENSG00000170037.15	CNTROB	chr17	+	7944122	7944638	7944475	7944638	7943390	7943524	5536	91,106	1,0	41,38	0,0	298	149	1	1	0.978,1.0	1.0,1.0	-0.011
5537	ENSG00000170037.15	CNTROB	chr17	+	7949081	7949157	7949084	7949157	7948486	7948619	5537	39,12	51,18	5,4	11,20	152	149	0.0205458	0.095443	0.428,0.395	0.308,0.164	0.175
5538	ENSG00000170037.15	CNTROB	chr17	+	7949081	7949157	7949084	7949157	7948486	7948685	5538	2,0	0,0	0,1	0,1	152	149	1	1	1.0,NA	NA,0.495	0.505
5539	ENSG00000170049.11	KCNAB3	chr17	-	7923455	7923631	7923455	7923544	7923710	7923831	5539	0,0	2,1	1,0	0,1	236	149	1	1	0.0,0.0	1.0,0.0	-0.5
5540	ENSG00000141499.19	WRAP53	chr17	+	7700993	7701549	7701426	7701549	7700740	7700829	5540	2,13	3,0	19,10	0,0	298	149	0.0272568	0.120174	0.25,1.0	1.0,1.0	-0.375
5541	ENSG00000141499.19	WRAP53	chr17	+	7700993	7701549	7701440	7701549	7700740	7700829	5541	2,13	0,4	21,14	0,0	298	149	0.00528696	0.0312916	1.0,0.619	1.0,1.0	-0.191
5542	ENSG00000141499.19	WRAP53	chr17	+	7700993	7701549	7701458	7701549	7700740	7700829	5542	2,9	85,116	20,13	4,7	298	149	1.11022e-16	1.2149e-14	0.012,0.037	0.714,0.481	-0.573
5543	ENSG00000141499.19	WRAP53	chr17	+	7701426	7701549	7701440	7701549	7700740	7700829	5543	4,0	0,4	2,4	0,0	163	149	0.00945407	0.0504379	1.0,0.0	1.0,1.0	-0.5
5544	ENSG00000141499.19	WRAP53	chr17	+	7701426	7701549	7701458	7701549	7700740	7700829	5544	4,0	85,116	2,6	4,7	181	149	9.34854e-07	1.83121e-05	0.037,0.0	0.292,0.414	-0.334
5545	ENSG00000141499.19	WRAP53	chr17	+	7701440	7701549	7701458	7701549	7700740	7700829	5545	0,4	85,116	0,2	4,7	167	149	0.912475	1	0.0,0.03	0.0,0.203	-0.087
5547	ENSG00000141510.20	TP53	chr17	-	7668420	7669784	7668420	7669690	7670608	7670715	5547	10,20	762,613	42,29	31,30	243	149	0	0	0.008,0.02	0.454,0.372	-0.399
5548	ENSG00000141510.20	TP53	chr17	-	7668420	7670715	7668420	7669690	7673534	7673608	5548	699,510	0,1	79,61	0,0	298	149	1	1	1.0,0.996	1.0,1.0	-0.002
5549	ENSG00000141510.20	TP53	chr17	-	7673206	7673339	7673206	7673266	7673534	7673608	5549	3,6	1,0	30,14	0,0	222	149	1	1	0.668,1.0	1.0,1.0	-0.166
5550	ENSG00000141510.20	TP53	chr17	-	7673700	7673840	7673700	7673837	7674180	7674290	5550	5,1	324,273	3,1	21,37	152	149	0.166254	0.499622	0.015,0.004	0.123,0.026	-0.065
5552	ENSG00000141510.20	TP53	chr17	-	7676520	7676622	7676520	7676619	7687376	7687487	5552	453,261	3,2	24,34	0,0	152	149	1	1	0.993,0.992	1.0,1.0	-0.008
5557	ENSG00000129255.17	MPDU1	chr17	+	7585694	7585797	7585731	7585797	7583859	7583965	5557	0,2	94,85	1,0	3,2	186	149	1	1	0.0,0.019	0.211,0.0	-0.096
5558	ENSG00000129255.17	MPDU1	chr17	+	7585945	7586078	7585950	7586078	7585731	7585797	5558	99,84	7,0	6,2	0,0	154	149	0.0760376	0.273653	0.932,1.0	1.0,1.0	-0.034
5559	ENSG00000129255.17	MPDU1	chr17	+	7586655	7586777	7586691	7586777	7585945	7586078	5559	15,35	187,161	1,4	3,6	185	149	0.190337	0.554922	0.061,0.149	0.212,0.349	-0.175
5562	ENSG00000129255.17	MPDU1	chr17	+	7586691	7587271	7587160	7587271	7585945	7586078	5562	214,185	3,1	15,21	0,0	298	149	0.549167	1	0.973,0.989	1.0,1.0	-0.019
5564	ENSG00000129255.17	MPDU1	chr17	+	7586898	7587271	7587169	7587271	7586691	7586777	5564	179,194	1,0	15,24	0,0	298	149	1	1	0.989,1.0	1.0,1.0	-0.006
5566	ENSG00000233223.6	MPDU1-AS1	chr17	-	7581966	7582531	7581966	7582163	7582875	7583742	5566	12,15	9,1	3,4	2,0	298	149	0.304524	0.791294	0.4,0.882	0.429,1.0	-0.074
5571	ENSG00000262481.5	TMEM256-PLSCR3	chr17	-	7394103	7394271	7394103	7394267	7394907	7395090	5571	7,7	2,4	2,1	0,0	153	149	0.0001064	0.00115219	0.773,0.63	1.0,1.0	-0.298
5572	ENSG00000262481.5	TMEM256-PLSCR3	chr17	-	7394103	7394734	7394103	7394267	7394907	7395090	5572	5,4	2,4	10,12	0,0	298	149	5.1185e-07	1.07033e-05	0.556,0.333	1.0,1.0	-0.555
5573	ENSG00000262481.5	TMEM256-PLSCR3	chr17	-	7394103	7394734	7394103	7394271	7394907	7395090	5573	3,2	5,5	8,11	0,0	298	149	8.76523e-10	3.29636e-08	0.231,0.167	1.0,1.0	-0.801
5582	ENSG00000072778.21	ACADVL	chr17	+	7220463	7220676	7220603	7220676	7220121	7220197	5582	63,32	3,2	41,38	0,1	289	149	0.0196768	0.0924393	0.915,0.892	1.0,0.951	-0.072
5587	ENSG00000072778.21	ACADVL	chr17	+	7220890	7221058	7220923	7221058	7220765	7220830	5587	4,0	41,26	1,4	22,19	182	149	0.348305	0.872351	0.074,0.0	0.036,0.147	-0.054
5588	ENSG00000072778.21	ACADVL	chr17	+	7220893	7221058	7220923	7221058	7220765	7220830	5588	4,0	41,26	1,4	22,19	179	149	0.346275	0.868462	0.075,0.0	0.036,0.149	-0.055
5589	ENSG00000072778.21	ACADVL	chr17	+	7221518	7221682	7221537	7221682	7220923	7221058	5589	2,2	48,26	1,4	21,46	168	149	0.620933	1	0.036,0.064	0.041,0.072	-0.006
5590	ENSG00000072778.21	ACADVL	chr17	+	7221518	7221682	7221606	7221682	7220923	7221058	5590	29,34	0,7	21,35	0,1	237	149	0.00348349	0.0223146	1.0,0.753	1.0,0.957	-0.102
5592	ENSG00000072778.21	ACADVL	chr17	+	7221537	7221682	7221606	7221682	7220923	7221058	5592	75,58	0,7	41,77	0,1	218	149	0.0096576	0.0511487	1.0,0.85	1.0,0.981	-0.065
5595	ENSG00000072778.21	ACADVL	chr17	+	7221933	7222081	7221951	7222081	7221537	7221682	5595	1,2	74,71	2,3	54,66	167	149	0.263088	0.709597	0.012,0.025	0.032,0.039	-0.017
5597	ENSG00000072778.21	ACADVL	chr17	+	7223090	7223237	7223132	7223237	7222666	7222865	5597	18,5	79,71	8,14	3,4	191	149	3.43281e-11	1.69936e-09	0.151,0.052	0.675,0.732	-0.602
5600	ENSG00000072778.21	ACADVL	chr17	+	7223108	7223237	7223132	7223237	7222666	7222865	5600	9,5	79,71	4,5	3,4	173	149	3.38107e-05	0.000421664	0.089,0.057	0.535,0.518	-0.453
5606	ENSG00000072778.21	ACADVL	chr17	+	7223132	7223237	7223136	7223237	7222759	7222865	5606	79,72	0,2	3,4	0,0	153	149	1	1	1.0,0.972	1.0,1.0	-0.014
5611	ENSG00000072778.21	ACADVL	chr17	+	7224479	7224552	7224483	7224552	7224320	7224393	5611	97,75	6,4	50,50	6,10	153	149	0.0163373	0.0788112	0.94,0.948	0.89,0.83	0.084
5612	ENSG00000072778.21	ACADVL	chr17	+	7224714	7224884	7224808	7224884	7224479	7224552	5612	31,13	0,1	20,8	0,0	243	149	1	1	1.0,0.889	1.0,1.0	-0.055
5640	ENSG00000161939.19	RNASEK-C17orf49	chr17	+	7017256	7017520	7017260	7017520	7016494	7016685	5640	46,37	6,5	6,4	3,0	153	149	0.794755	1	0.882,0.878	0.661,1.0	0.049
5641	ENSG00000161939.19	RNASEK-C17orf49	chr17	+	7017256	7017520	7017260	7017520	7016909	7017014	5641	58,84	98,167	3,2	3,7	153	149	0.662043	1	0.366,0.329	0.493,0.218	-0.008
5642	ENSG00000267532.7	MIR497HG	chr17	-	6999208	6999591	6999208	6999586	7002483	7002620	5642	1,0	0,0	0,0	0,1	154	149	1	1	1.0,NA	NA,0.0	1
5656	ENSG00000198920.11	KIAA0753	chr17	-	6590509	6590630	6590509	6590578	6594971	6595053	5656	9,13	4,1	8,10	1,3	201	149	0.847928	1	0.625,0.906	0.856,0.712	-0.018
5670	ENSG00000108509.22	CAMTA2	chr17	-	4981677	4981831	4981677	4981742	4982088	4982227	5670	103,95	0,0	53,71	0,1	238	149	1	1	1.0,1.0	1.0,0.978	0.011
5671	ENSG00000108509.22	CAMTA2	chr17	-	4981677	4981831	4981677	4981742	4982756	4982892	5671	61,66	3,1	26,35	10,7	238	149	1.12769e-05	0.000166073	0.927,0.976	0.619,0.758	0.263
5672	ENSG00000108509.22	CAMTA2	chr17	-	4982088	4982175	4982088	4982160	4982756	4982892	5672	19,3	43,23	8,3	21,15	164	149	0.874135	1	0.286,0.106	0.257,0.154	-0.01
5673	ENSG00000108509.22	CAMTA2	chr17	-	4982088	4982227	4982088	4982160	4982756	4982892	5673	13,9	43,23	15,20	21,15	216	149	0.00423851	0.0261942	0.173,0.213	0.33,0.479	-0.211
5674	ENSG00000108509.22	CAMTA2	chr17	-	4982088	4982227	4982088	4982175	4982756	4982892	5674	4,9	10,3	11,19	4,2	201	149	0.03281	0.139218	0.229,0.69	0.671,0.876	-0.314
5675	ENSG00000108509.22	CAMTA2	chr17	-	4982975	4983043	4982975	4983040	4985879	4985983	5675	40,25	0,6	29,19	0,0	152	149	0.00785103	0.0434629	1.0,0.803	1.0,1.0	-0.099
5685	ENSG00000141503.18	MINK1	chr17	+	4881113	4881257	4881131	4881257	4880983	4881040	5685	1,0	73,51	1,4	53,42	167	149	0.108674	0.359382	0.012,0.0	0.017,0.078	-0.042
5687	ENSG00000141503.18	MINK1	chr17	+	4890221	4890735	4890516	4890735	4889646	4889763	5687	8,3	19,33	35,40	9,6	298	149	2.42029e-14	1.92485e-12	0.174,0.043	0.66,0.769	-0.606
5688	ENSG00000141503.18	MINK1	chr17	+	4891455	4891716	4891515	4891716	4890950	4891124	5688	140,194	28,33	82,75	18,14	209	149	0.73949	1	0.781,0.807	0.765,0.792	0.016
5689	ENSG00000141503.18	MINK1	chr17	+	4892945	4893067	4892978	4893067	4892655	4892768	5689	2,0	73,39	0,6	40,20	182	149	0.0209438	0.0969826	0.022,0.0	0.0,0.197	-0.088
5690	ENSG00000141503.18	MINK1	chr17	+	4893987	4894093	4893990	4894093	4893433	4893597	5690	28,21	22,8	10,2	4,3	152	149	0.970424	1	0.555,0.72	0.71,0.395	0.085
5691	ENSG00000142507.11	PSMB6	chr17	+	4797681	4797811	4797716	4797811	4797437	4797569	5691	531,389	3,2	30,32	0,1	184	149	1	1	0.993,0.994	1.0,0.963	0.012
5697	ENSG00000132382.16	MYBBP1A	chr17	-	4540347	4540484	4540347	4540442	4541462	4541564	5697	341,297	2,0	67,76	0,0	191	149	1	1	0.993,1.0	1.0,1.0	-0.004
5698	ENSG00000132382.16	MYBBP1A	chr17	-	4542463	4542532	4542463	4542520	4542615	4542741	5698	268,161	0,1	56,104	0,0	161	149	1	1	1.0,0.993	1.0,1.0	-0.004
5699	ENSG00000132382.16	MYBBP1A	chr17	-	4545025	4545345	4545025	4545175	4545609	4545761	5699	385,328	1,2	88,98	1,0	298	149	1	1	0.995,0.988	0.978,1.0	0.003
5700	ENSG00000132382.16	MYBBP1A	chr17	-	4545845	4545942	4545845	4545932	4547957	4548057	5700	392,207	0,1	33,56	0,0	159	149	1	1	1.0,0.995	1.0,1.0	-0.002
5702	ENSG00000132382.16	MYBBP1A	chr17	-	4551879	4552042	4551879	4551997	4552124	4552292	5702	11,2	189,85	4,10	39,53	194	149	0.00855701	0.0465914	0.043,0.018	0.073,0.127	-0.07
5705	ENSG00000132382.16	MYBBP1A	chr17	-	4553809	4553917	4553809	4553887	4554018	4554093	5705	257,180	1,3	65,92	2,0	179	149	1	1	0.995,0.98	0.964,1.0	0.006
5706	ENSG00000132388.14	UBE2G1	chr17	-	4272027	4273311	4272027	4272516	4282797	4282921	5706	3,8	166,229	21,12	12,8	298	149	0	0	0.009,0.017	0.467,0.429	-0.435
5707	ENSG00000132388.14	UBE2G1	chr17	-	4289229	4289408	4289229	4289267	4296716	4296814	5707	262,275	1,0	26,31	0,0	290	149	1	1	0.993,1.0	1.0,1.0	-0.004
5708	ENSG00000130119.18	GNL3L	chrX	+	54532446	54532585	54532519	54532585	54530229	54530302	5708	6,6	37,63	1,1	28,13	222	149	0.0363319	0.151338	0.098,0.06	0.023,0.049	0.043
5709	ENSG00000130119.18	GNL3L	chrX	+	54532519	54532585	54532523	54532585	54530237	54530302	5709	48,76	0,1	28,13	0,0	153	149	1	1	1.0,0.987	1.0,1.0	-0.006
5710	ENSG00000130119.18	GNL3L	chrX	+	54532519	54532585	54532523	54532585	54530259	54530419	5710	133,112	0,2	40,22	0,0	153	149	1	1	1.0,0.982	1.0,1.0	-0.009
5712	ENSG00000130119.18	GNL3L	chrX	+	54543145	54543342	54543206	54543342	54542954	54543038	5712	1,0	100,117	7,13	37,22	210	149	9.25466e-11	4.17004e-09	0.007,0.0	0.118,0.295	-0.203
5713	ENSG00000074370.20	ATP2A3	chr17	-	3923872	3925441	3923872	3925438	3928662	3928780	5713	6,6	3,0	1,0	0,0	152	149	1	1	0.662,1.0	1.0,NA	-0.169
5715	ENSG00000074370.20	ATP2A3	chr17	-	3935191	3935277	3935191	3935268	3936266	3936469	5715	12,8	0,0	1,3	3,0	158	149	0.0430369	0.174113	1.0,1.0	0.239,1.0	0.381
5716	ENSG00000101004.17	NINL	chr20	-	25489874	25490018	25489874	25489985	25491350	25491525	5716	1,1	4,1	3,4	1,0	182	149	3.66366e-05	0.000453409	0.17,0.45	0.711,1.0	-0.545
5717	ENSG00000101004.17	NINL	chr20	-	25498209	25498361	25498209	25498346	25500839	25501010	5717	0,0	3,9	7,0	1,4	164	149	0.00516552	0.0307355	0.0,0.0	0.864,0.0	-0.432
5719	ENSG00000196689.14	TRPV1	chr17	-	3577597	3577810	3577597	3577763	3580456	3580527	5719	0,0	3,12	6,9	2,6	196	149	1.5037e-08	4.38574e-07	0.0,0.0	0.695,0.533	-0.614
5723	ENSG00000132359.18	RAP1GAP2	chr17	+	3005340	3005440	3005368	3005440	2998220	2998376	5723	2,0	28,24	0,0	1,5	177	149	0.365513	0.901335	0.057,0.0	0.0,0.0	0.029
5725	ENSG00000132361.19	CLUH	chr17	-	2696433	2696538	2696433	2696535	2696718	2696942	5725	69,41	38,13	15,20	5,9	152	149	0.625724	1	0.64,0.756	0.746,0.685	-0.018
5726	ENSG00000132361.19	CLUH	chr17	-	2700677	2700825	2700677	2700782	2701139	2701265	5726	295,287	0,0	93,113	3,5	192	149	0.0102567	0.0537157	1.0,1.0	0.96,0.946	0.047
5727	ENSG00000132361.19	CLUH	chr17	-	2701365	2701520	2701365	2701511	2701612	2701737	5727	362,268	1,0	63,94	0,0	158	149	1	1	0.997,1.0	1.0,1.0	-0.002
5728	ENSG00000132361.19	CLUH	chr17	-	2701365	2701538	2701365	2701511	2701612	2701737	5728	45,27	1,0	5,17	0,0	176	149	1	1	0.974,1.0	1.0,1.0	-0.013
5729	ENSG00000132361.19	CLUH	chr17	-	2701365	2701538	2701365	2701520	2701612	2701737	5729	8,2	325,243	2,7	60,84	167	149	0.0254901	0.113659	0.021,0.007	0.029,0.069	-0.035
5730	ENSG00000132361.19	CLUH	chr17	-	2701612	2701752	2701612	2701737	2701913	2702057	5730	6,1	145,130	0,1	45,43	164	149	0.259527	0.702596	0.036,0.007	0.0,0.021	0.011
5734	ENSG00000167721.12	TSR1	chr17	-	2324503	2324578	2324503	2324576	2324688	2324829	5734	158,152	0,3	19,31	10,4	151	149	2.71184e-08	7.48921e-07	1.0,0.98	0.652,0.884	0.222
5737	ENSG00000108963.19	DPH1	chr17	+	2035969	2036686	2036528	2036686	2033778	2033842	5737	170,89	1,4	57,82	0,1	298	149	0.149601	0.460902	0.988,0.918	1.0,0.976	-0.035
5738	ENSG00000108963.19	DPH1	chr17	+	2036428	2036686	2036528	2036686	2035969	2036091	5738	11,7	276,250	38,54	41,24	249	149	0	0	0.023,0.016	0.357,0.574	-0.446
5739	ENSG00000108963.19	DPH1	chr17	+	2042604	2043898	2042975	2043898	2041767	2041875	5739	480,399	2,2	54,70	0,0	298	149	1	1	0.992,0.99	1.0,1.0	-0.009
5740	ENSG00000132383.13	RPA1	chr17	+	1844508	1844686	1844577	1844686	1843919	1843998	5740	0,0	298,210	5,18	15,16	218	149	3.33067e-16	3.51265e-14	0.0,0.0	0.186,0.435	-0.31
5743	ENSG00000186532.13	SMYD4	chr17	-	1784325	1784461	1784325	1784380	1786809	1786973	5743	30,18	1,0	22,23	0,0	230	149	1	1	0.951,1.0	1.0,1.0	-0.024
5744	ENSG00000132386.12	SERPINF1	chr17	+	1769671	1770050	1769851	1770050	1766902	1766994	5744	2,5	40,4	0,0	0,6	298	149	1	1	0.024,0.385	NA,0.0	0.205
5746	ENSG00000132386.12	SERPINF1	chr17	+	1769671	1770050	1769893	1770050	1766902	1766994	5746	8,14	1,0	1,0	0,0	298	149	1	1	0.8,1.0	1.0,NA	-0.1
5748	ENSG00000132386.12	SERPINF1	chr17	+	1769851	1770050	1769893	1770050	1766902	1766994	5748	47,15	1,0	1,6	0,0	191	149	1	1	0.973,1.0	1.0,1.0	-0.014
5772	ENSG00000132376.21	INPP5K	chr17	-	1513452	1513561	1513452	1513554	1513871	1513979	5772	37,39	4,2	8,6	0,2	156	149	0.319643	0.821198	0.898,0.949	1.0,0.741	0.053
5774	ENSG00000167699.15	GLOD4	chr17	-	770043	770224	770043	770157	770420	770507	5774	7,4	167,186	5,11	8,17	216	149	2.46942e-10	1.03573e-08	0.028,0.015	0.301,0.309	-0.283
5777	ENSG00000167699.15	GLOD4	chr17	-	778694	778810	778694	778744	782165	782280	5777	5,6	54,60	11,8	4,5	215	149	6.37747e-10	2.47514e-08	0.06,0.065	0.656,0.526	-0.528
5778	ENSG00000141252.21	VPS53	chr17	-	623532	623674	623532	623669	627173	627316	5778	104,89	0,0	44,23	0,2	154	149	0.738052	1	1.0,1.0	1.0,0.918	0.041
5779	ENSG00000141252.21	VPS53	chr17	-	667409	670807	667409	669887	697417	697484	5779	0,0	1,0	2,9	0,0	298	149	1	1	0.0,NA	1.0,1.0	-1
5780	ENSG00000140995.18	DEF8	chr16	+	89949416	89949513	89949419	89949513	89948754	89948814	5780	7,12	3,14	0,0	2,0	152	149	1	1	0.696,0.457	0.0,NA	0.577
5783	ENSG00000140995.18	DEF8	chr16	+	89954242	89954376	89954288	89954376	89949419	89949513	5783	71,50	3,0	12,13	1,0	195	149	0.645912	1	0.948,1.0	0.902,1.0	0.023
5784	ENSG00000140995.18	DEF8	chr16	+	89957472	89957660	89957510	89957660	89955168	89955266	5784	2,6	210,112	5,9	11,9	187	149	1.35113e-09	4.92841e-08	0.008,0.041	0.266,0.443	-0.33
5786	ENSG00000140995.18	DEF8	chr16	+	89957472	89957660	89957540	89957660	89955168	89955266	5786	54,38	0,4	8,19	0,0	217	149	0.154475	0.472064	1.0,0.867	1.0,1.0	-0.067
5788	ENSG00000140995.18	DEF8	chr16	+	89957510	89957660	89957540	89957660	89955168	89955266	5788	262,144	0,4	14,19	0,0	179	149	0.932351	1	1.0,0.968	1.0,1.0	-0.016
5791	ENSG00000140995.18	DEF8	chr16	+	89964142	89964310	89964169	89964310	89963362	89963443	5791	0,0	6,4	4,2	2,1	176	149	2.57107e-06	4.47599e-05	0.0,0.0	0.629,0.629	-0.629
5792	ENSG00000140995.18	DEF8	chr16	+	89964142	89964310	89964175	89964310	89963362	89963443	5792	1,0	0,0	4,2	0,1	182	149	1	1	1.0,NA	1.0,0.621	0.19
5793	ENSG00000140995.18	DEF8	chr16	+	89964142	89964310	89964220	89964310	89963362	89963443	5793	8,9	4,0	14,8	0,0	227	149	0.0101466	0.0532159	0.568,1.0	1.0,1.0	-0.216
5794	ENSG00000140995.18	DEF8	chr16	+	89964169	89964310	89964175	89964310	89963362	89963443	5794	7,4	0,0	2,1	0,1	155	149	1	1	1.0,1.0	1.0,0.49	0.255
5795	ENSG00000140995.18	DEF8	chr16	+	89964169	89964310	89964220	89964310	89963362	89963443	5795	14,13	4,0	12,7	0,0	200	149	0.0232615	0.105863	0.723,1.0	1.0,1.0	-0.139
5796	ENSG00000140995.18	DEF8	chr16	+	89964175	89964310	89964220	89964310	89963362	89963443	5796	7,9	4,0	10,7	0,0	194	149	0.0121473	0.0615783	0.573,1.0	1.0,1.0	-0.214
5799	ENSG00000187741.17	FANCA	chr16	-	89738881	89738974	89738881	89738926	89739132	89739289	5799	51,51	2,0	78,48	0,0	197	149	0.480547	1	0.951,1.0	1.0,1.0	-0.024
5800	ENSG00000187741.17	FANCA	chr16	-	89770165	89770462	89770165	89770259	89770563	89770634	5800	23,8	43,16	40,51	12,7	298	149	8.98532e-10	3.36176e-08	0.211,0.2	0.625,0.785	-0.5
5804	ENSG00000187741.17	FANCA	chr16	-	89810928	89811071	89810928	89811057	89814519	89814613	5804	50,43	1,0	53,61	2,1	163	149	0.432717	0.999962	0.979,1.0	0.96,0.982	0.019
5805	ENSG00000187741.17	FANCA	chr16	-	89810928	89811101	89810928	89811057	89814519	89814613	5805	2,3	1,0	12,14	2,1	193	149	0.19507	0.564647	0.607,1.0	0.822,0.915	-0.065
5806	ENSG00000187741.17	FANCA	chr16	-	89810928	89811101	89810928	89811071	89814519	89814613	5806	2,0	50,40	6,9	47,56	179	149	0.000251785	0.00244136	0.032,0.0	0.096,0.118	-0.091
5807	ENSG00000187741.17	FANCA	chr16	-	89814519	89814635	89814519	89814613	89815876	89815900	5807	5,0	56,56	11,13	70,99	171	149	0.00364775	0.0231326	0.072,0.0	0.12,0.103	-0.075
5808	ENSG00000187741.17	FANCA	chr16	-	89810928	89811071	89810928	89811057	89815876	89815986	5808	3,4	1,1	6,5	0,0	163	149	0.100721	0.341065	0.733,0.785	1.0,1.0	-0.241
5809	ENSG00000108840.18	HDAC5	chr17	-	44078794	44078879	44078794	44078873	44079143	44079277	5809	35,31	0,2	5,2	0,0	155	149	0.378862	0.923879	1.0,0.937	1.0,1.0	-0.031
5814	ENSG00000108840.18	HDAC5	chr17	-	44080762	44080882	44080762	44080852	44082584	44082672	5814	92,64	2,0	7,6	0,0	179	149	1	1	0.975,1.0	1.0,1.0	-0.012
5818	ENSG00000108840.18	HDAC5	chr17	-	44092171	44092299	44092171	44092284	44092380	44092527	5818	5,1	112,52	0,0	6,9	164	149	0.135301	0.426228	0.039,0.017	0.0,0.0	0.028
5819	ENSG00000108840.18	HDAC5	chr17	-	44093313	44093479	44093313	44093458	44093574	44093834	5819	14,19	1,0	2,9	0,0	170	149	1	1	0.925,1.0	1.0,1.0	-0.037
5820	ENSG00000108840.18	HDAC5	chr17	-	44093313	44093482	44093313	44093458	44093574	44093834	5820	15,19	1,0	2,13	0,0	173	149	1	1	0.928,1.0	1.0,1.0	-0.036
5821	ENSG00000108840.18	HDAC5	chr17	-	44093313	44093485	44093313	44093458	44093574	44093834	5821	43,60	1,0	14,19	0,0	176	149	1	1	0.973,1.0	1.0,1.0	-0.014
5824	ENSG00000108840.18	HDAC5	chr17	-	44093313	44093485	44093313	44093482	44093574	44093834	5824	29,41	1,0	12,6	0,0	152	149	1	1	0.966,1.0	1.0,1.0	-0.017
5826	ENSG00000108840.18	HDAC5	chr17	-	44110728	44110803	44110728	44110800	44117493	44117704	5826	31,12	44,14	0,0	1,6	152	149	8.14338e-06	0.000125417	0.409,0.457	0.0,0.0	0.433
5828	ENSG00000158805.13	ZNF276	chr16	+	89723136	89723709	89723259	89723709	89722530	89722834	5828	67,33	0,0	64,79	1,0	272	149	1	1	1.0,1.0	0.972,1.0	0.014
5829	ENSG00000158805.13	ZNF276	chr16	+	89723259	89723709	89723278	89723709	89723136	89723183	5829	90,30	6,0	58,49	6,9	168	149	0.0192777	0.0909163	0.93,1.0	0.896,0.828	0.103
5830	ENSG00000100994.13	PYGB	chr20	+	25274576	25274723	25274591	25274723	25271382	25271486	5830	7,2	91,47	4,0	9,12	164	149	0.561342	1	0.065,0.037	0.288,0.0	-0.093
5831	ENSG00000100994.13	PYGB	chr20	+	25278285	25278462	25278318	25278462	25277243	25277326	5831	0,0	65,50	1,0	14,9	182	149	1	1	0.0,0.0	0.055,0.0	-0.028
5834	ENSG00000100994.13	PYGB	chr20	+	25280265	25280412	25280283	25280412	25279056	25279149	5834	109,99	0,2	15,20	0,0	167	149	1	1	1.0,0.978	1.0,1.0	-0.011
5835	ENSG00000100994.13	PYGB	chr20	+	25280265	25280412	25280286	25280412	25279056	25279149	5835	109,99	1,0	15,20	0,0	170	149	1	1	0.99,1.0	1.0,1.0	-0.005
5843	ENSG00000131165.17	CHMP1A	chr16	-	89646526	89646733	89646526	89646714	89647202	89647331	5843	4,0	115,57	0,0	5,9	168	149	0.542697	1	0.03,0.0	0.0,0.0	0.015
5844	ENSG00000131165.17	CHMP1A	chr16	-	89647202	89648478	89647202	89647331	89649350	89649497	5844	10,2	98,47	2,6	2,2	298	149	8.21784e-05	0.000920019	0.049,0.021	0.333,0.6	-0.431
5845	ENSG00000131165.17	CHMP1A	chr16	-	89647202	89648997	89647202	89647331	89649350	89649497	5845	10,2	98,47	2,8	2,2	298	149	1.76193e-05	0.000241234	0.049,0.021	0.333,0.667	-0.465
5847	ENSG00000131165.17	CHMP1A	chr16	-	89649350	89649520	89649350	89649497	89651568	89651646	5847	5,5	184,117	2,3	9,5	172	149	0.0123011	0.0622065	0.023,0.036	0.161,0.342	-0.222
5848	ENSG00000131165.17	CHMP1A	chr16	-	89649350	89649552	89649350	89649497	89651568	89651646	5848	5,5	184,117	4,5	9,5	204	149	7.13527e-06	0.000111663	0.019,0.03	0.245,0.422	-0.309
5850	ENSG00000178773.16	CPNE7	chr16	+	89586669	89586756	89586675	89586756	89585686	89585785	5850	53,43	0,0	85,105	2,0	155	149	1	1	1.0,1.0	0.976,1.0	0.012
5851	ENSG00000178773.16	CPNE7	chr16	+	89587042	89587102	89587050	89587102	89586669	89586756	5851	18,30	5,5	70,91	20,18	157	149	0.580256	1	0.774,0.851	0.769,0.828	0.014
5852	ENSG00000197912.17	SPG7	chr16	+	89523482	89524247	89524005	89524247	89512947	89513037	5852	8,10	5,12	39,33	0,1	298	149	1.96853e-11	1.00526e-09	0.444,0.294	1.0,0.943	-0.603
5854	ENSG00000197912.17	SPG7	chr16	+	89528631	89529524	89529134	89529524	89526328	89526468	5854	3,5	0,0	30,34	7,2	298	149	0.000230019	0.00225738	1.0,1.0	0.682,0.895	0.212
5856	ENSG00000197912.17	SPG7	chr16	+	89528631	89529579	89529476	89529579	89526328	89526468	5856	7,0	43,62	19,18	19,32	298	149	2.37591e-09	8.22766e-08	0.075,0.0	0.333,0.22	-0.239
5858	ENSG00000197912.17	SPG7	chr16	+	89529476	89530808	89530682	89530808	89526328	89526468	5858	43,64	1,0	38,47	2,0	298	149	0.832674	1	0.956,1.0	0.905,1.0	0.025
5862	ENSG00000197912.17	SPG7	chr16	+	89530654	89530808	89530682	89530808	89529491	89529579	5862	0,0	22,27	1,3	12,21	177	149	0.0650216	0.241903	0.0,0.0	0.066,0.107	-0.086
5865	ENSG00000197912.17	SPG7	chr16	+	89545871	89546760	89546657	89546760	89544647	89544772	5865	4,6	58,23	20,21	50,29	298	149	8.57618e-05	0.000954994	0.033,0.115	0.167,0.266	-0.143
5869	ENSG00000197912.17	SPG7	chr16	+	89548979	89549336	89549080	89549336	89548002	89548113	5869	7,10	1,2	33,33	0,0	250	149	0.0130084	0.0651047	0.807,0.749	1.0,1.0	-0.222
5870	ENSG00000197912.17	SPG7	chr16	+	89552851	89553135	89552978	89553135	89550493	89550609	5870	1,0	77,44	6,5	51,53	276	149	0.00144803	0.0108969	0.007,0.0	0.06,0.048	-0.05
5874	ENSG00000197912.17	SPG7	chr16	+	89553738	89553960	89553793	89553960	89552978	89553135	5874	3,2	61,26	5,2	30,31	204	149	0.253947	0.69083	0.035,0.053	0.109,0.045	-0.033
5875	ENSG00000197912.17	SPG7	chr16	+	89553757	89553960	89553793	89553960	89552978	89553135	5875	3,2	61,26	2,2	30,31	185	149	0.890994	1	0.038,0.058	0.051,0.049	-0.002
5876	ENSG00000197912.17	SPG7	chr16	+	89554469	89554563	89554485	89554563	89553793	89553960	5876	0,1	81,47	0,2	59,69	165	149	1	1	0.0,0.019	0.0,0.026	-0.003
5880	ENSG00000130826.20	DKC1	chrX	+	154765319	154765530	154765443	154765530	154764898	154764966	5880	18,8	196,254	27,26	19,17	273	149	0	0	0.048,0.017	0.437,0.455	-0.413
5881	ENSG00000130826.20	DKC1	chrX	+	154767255	154767382	154767310	154767382	154766215	154766400	5881	165,133	4,0	37,22	0,0	204	149	0.553192	1	0.968,1.0	1.0,1.0	-0.016
5882	ENSG00000130826.20	DKC1	chrX	+	154768265	154768432	154768301	154768432	154767255	154767382	5882	4,1	225,204	0,5	14,8	185	149	0.00687266	0.0388898	0.014,0.004	0.0,0.335	-0.159
[truncated: 12,555 more rows]

## Sheet: Control_A5SS.MATS_JC
ID...1	GeneID	geneSymbol	chr	strand	longExonStart_0base	longExonEnd	shortES	shortEE	flankingES	flankingEE	ID...12	IJC_SAMPLE_1	SJC_SAMPLE_1	IJC_SAMPLE_2	SJC_SAMPLE_2	IncFormLen	SkipFormLen	PValue	FDR	IncLevel1	IncLevel2	IncLevelDifference
36	ENSG00000160211.21	G6PD	chrX	-	154536136	154536178	154536140	154536178	154535936	154536045	36	4,0	108,61	0,0	10,11	153	149	0.558745	1	0.035,0.0	0.0,0.0	0.018
37	ENSG00000071859.16	FAM50A	chrX	+	154449882	154449931	154449882	154449928	154450028	154450099	37	146,68	0,0	13,16	2,0	152	149	0.76619	1	1.0,1.0	0.864,1.0	0.068
41	ENSG00000071553.19	ATP6AP1	chrX	+	154429047	154431657	154429047	154429174	154431829	154431904	41	11,6	214,123	5,5	0,8	298	149	0.00024823	0.00192716	0.025,0.024	1.0,0.238	-0.595
44	ENSG00000071553.19	ATP6AP1	chrX	+	154433634	154433771	154433634	154433720	154434207	154434446	44	0,2	446,243	0,0	13,9	200	149	1	1	0.0,0.006	0.0,0.0	0.003
45	ENSG00000071553.19	ATP6AP1	chrX	+	154434207	154435186	154434207	154434446	154435273	154435505	45	293,251	0,6	10,17	0,0	298	149	0.476769	0.989977	1.0,0.954	1.0,1.0	-0.023
46	ENSG00000102125.18	TAFAZZIN	chrX	+	154413206	154413339	154413206	154413252	154413481	154413567	46	2,0	19,9	3,1	0,2	236	149	0.00456265	0.0232583	0.062,0.0	1.0,0.24	-0.589
47	ENSG00000102125.18	TAFAZZIN	chrX	+	154413206	154413352	154413206	154413252	154413481	154413567	47	2,0	19,9	3,1	0,2	249	149	0.00575331	0.0284806	0.059,0.0	1.0,0.23	-0.586
48	ENSG00000102125.18	TAFAZZIN	chrX	+	154413206	154413358	154413206	154413252	154413481	154413567	48	2,2	19,9	3,1	0,2	255	149	0.0314783	0.117438	0.058,0.115	1.0,0.226	-0.526
52	ENSG00000102125.18	TAFAZZIN	chrX	+	154419542	154419746	154419542	154419623	154420031	154420094	52	9,11	9,10	4,13	0,0	272	149	2.73693e-08	5.81435e-07	0.354,0.376	1.0,1.0	-0.635
53	ENSG00000102119.13	EMD	chrX	+	154379484	154379566	154379484	154379562	154379689	154379794	53	292,186	2,0	18,9	0,0	153	149	1	1	0.993,1.0	1.0,1.0	-0.004
54	ENSG00000196924.20	FLNA	chrX	-	154350908	154351696	154351580	154351696	154350030	154350207	54	651,362	1,0	50,33	0,0	298	149	1	1	0.997,1.0	1.0,1.0	-0.002
55	ENSG00000196924.20	FLNA	chrX	-	154359989	154360587	154360004	154360587	154359731	154359905	55	600,231	1,0	49,26	0,0	164	149	1	1	0.998,1.0	1.0,1.0	-0.001
57	ENSG00000196924.20	FLNA	chrX	-	154365744	154366224	154366023	154366224	154365348	154365486	57	25,5	436,217	39,28	41,31	298	149	0	0	0.028,0.011	0.322,0.311	-0.297
58	ENSG00000172534.15	HCFC1	chrX	-	153951579	153951707	153951588	153951707	153951349	153951487	58	34,23	627,531	15,4	93,82	158	149	0.0301549	0.113875	0.049,0.039	0.132,0.044	-0.044
75	ENSG00000102181.23	CD99L2	chrX	-	150777335	150777482	150777443	150777482	150776173	150776293	75	0,0	73,28	0,6	0,4	257	149	1	1	0.0,0.0	NA,0.465	-0.465
77	ENSG00000197021.10	EOLA2	chrX	-	149937413	149937480	149937432	149937480	149934004	149934137	77	12,4	93,32	1,0	1,2	168	149	0.0443087	0.156082	0.103,0.1	0.47,0.0	-0.133
81	ENSG00000197021.10	EOLA2	chrX	-	149937623	149937745	149937632	149937745	149937432	149937480	81	2,0	0,0	0,0	0,1	158	149	1	1	1.0,NA	NA,0.0	1
83	ENSG00000197021.10	EOLA2	chrX	-	149937632	149938483	149938192	149938483	149937432	149937480	83	15,1	91,30	2,9	2,2	298	149	0.000130382	0.00110584	0.076,0.016	0.333,0.692	-0.466
85	ENSG00000241489.8	ENSG00000241489	chrX	-	149526529	149527068	149526935	149527068	149500948	149501037	85	4,5	2,0	8,10	5,1	298	149	0.203333	0.537089	0.5,1.0	0.444,0.833	0.112
96	ENSG00000156504.18	PABIR2	chrX	-	134793802	134793893	134793814	134793893	134789222	134789266	96	3,4	44,43	11,14	20,14	161	149	6.3789e-07	9.82591e-06	0.059,0.079	0.337,0.481	-0.34
97	ENSG00000156504.18	PABIR2	chrX	-	134793802	134793893	134793814	134793893	134789579	134789636	97	3,0	31,13	7,4	10,3	161	149	3.97432e-05	0.00038644	0.082,0.0	0.393,0.552	-0.432
100	ENSG00000134602.17	STK26	chrX	+	132023225	132023659	132023225	132023407	132054630	132054861	100	262,172	9,1	33,19	0,0	298	149	0.0166479	0.0695759	0.936,0.989	1.0,1.0	-0.037
102	ENSG00000213468.8	FIRRE	chrX	-	131756610	131756709	131756642	131756709	131755597	131755746	102	247,249	1,4	66,37	4,1	181	149	0.0757795	0.239212	0.995,0.981	0.931,0.968	0.038
104	ENSG00000213468.8	FIRRE	chrX	-	131794296	131794466	131794323	131794466	131785156	131785258	104	37,53	0,0	10,8	0,1	176	149	1	1	1.0,1.0	1.0,0.871	0.065
105	ENSG00000213468.8	FIRRE	chrX	-	131794296	131794466	131794323	131794466	131793993	131794115	105	112,136	3,0	17,29	0,4	176	149	0.0779504	0.24503	0.969,1.0	1.0,0.86	0.054
107	ENSG00000101966.15	XIAP	chrX	+	123888618	123888718	123888618	123888709	123891237	123891316	107	82,72	1,0	16,19	0,1	158	149	1	1	0.987,1.0	1.0,0.947	0.02
109	ENSG00000125676.21	THOC2	chrX	-	123620374	123620965	123620906	123620965	123619400	123619436	109	16,8	40,54	13,15	20,22	298	149	0.0077549	0.0364686	0.167,0.069	0.245,0.254	-0.132
110	ENSG00000125676.21	THOC2	chrX	-	123706853	123706949	123706857	123706949	123703453	123703505	110	3,0	77,92	0,0	28,28	153	149	0.639272	1	0.037,0.0	0.0,0.0	0.018
111	ENSG00000158290.20	CUL4B	chrX	-	120538117	120538209	120538123	120538209	120536926	120537034	111	7,7	75,141	1,0	12,12	155	149	0.028956	0.110106	0.082,0.046	0.074,0.0	0.027
112	ENSG00000158290.20	CUL4B	chrX	-	120561132	120561453	120561371	120561453	120560082	120560625	112	0,0	35,15	1,0	6,4	298	149	1	1	0.0,0.0	0.077,0.0	-0.038
118	ENSG00000157600.14	TMEM164	chrX	+	110003113	110003178	110003113	110003156	110003500	110004164	118	15,4	1,0	0,2	0,0	171	149	1	1	0.929,1.0	NA,1.0	-0.035
120	ENSG00000080561.15	MID2	chrX	+	107917505	107917739	107917505	107917649	107924342	107924504	120	9,19	11,27	2,2	1,0	239	149	0.00177875	0.0106027	0.338,0.305	0.555,1.0	-0.456
122	ENSG00000089682.19	RBM41	chrX	-	107088435	107088839	107088734	107088839	107069254	107069330	122	20,39	0,2	30,36	0,0	298	149	0.429145	0.938216	1.0,0.907	1.0,1.0	-0.046
123	ENSG00000089682.19	RBM41	chrX	-	107088435	107088839	107088734	107088839	107069254	107070425	123	20,39	0,1	32,36	0,0	298	149	1	1	1.0,0.951	1.0,1.0	-0.024
125	ENSG00000123562.19	MORF4L2	chrX	-	103683228	103684729	103684680	103684729	103675497	103677051	125	11,20	1,4	6,6	0,0	298	149	0.000675612	0.00465554	0.846,0.714	1.0,1.0	-0.22
128	ENSG00000123562.19	MORF4L2	chrX	-	103683228	103684729	103684680	103684729	103678498	103678600	128	11,20	25,28	6,6	3,1	298	149	0.0104463	0.0469195	0.18,0.263	0.5,0.75	-0.403
130	ENSG00000123562.19	MORF4L2	chrX	-	103684680	103685260	103685170	103685260	103678498	103678600	130	46,50	229,206	23,13	5,5	298	149	1.40554e-13	7.97512e-12	0.091,0.108	0.697,0.565	-0.531
131	ENSG00000123562.19	MORF4L2	chrX	-	103684680	103685260	103685170	103685260	103678498	103678651	131	53,64	209,189	22,15	0,12	298	149	0.00020436	0.00162707	0.113,0.145	1.0,0.385	-0.564
132	ENSG00000123562.19	MORF4L2	chrX	-	103686622	103686700	103686630	103686700	103685170	103685260	132	1,1	405,381	0,0	7,7	157	149	1	1	0.002,0.002	0.0,0.0	0.002
139	ENSG00000102409.11	BEX4	chrX	+	103215681	103215947	103215681	103215764	103216148	103217200	139	0,0	26,25	0,2	4,1	298	149	0.522366	1	0.0,0.0	0.0,0.5	-0.25
164	ENSG00000196440.12	ARMCX4	chrX	+	101486022	101486098	101486022	101486092	101487192	101487272	164	1,0	3,0	0,0	2,0	155	149	1	1	0.243,NA	0.0,NA	0.243
169	ENSG00000102385.14	DRP2	chrX	+	101242903	101243098	101242903	101242982	101245016	101245077	169	9,7	1,0	2,4	1,1	265	149	0.306495	0.734745	0.835,1.0	0.529,0.692	0.307
181	ENSG00000147180.18	ZNF711	chrX	+	85245902	85247072	85245902	85246022	85247546	85247651	181	26,34	11,15	11,4	0,0	298	149	2.30684e-06	3.05477e-05	0.542,0.531	1.0,1.0	-0.464
182	ENSG00000147180.18	ZNF711	chrX	+	85246929	85247183	85246929	85247072	85247546	85247651	182	44,29	1,1	11,14	0,0	260	149	0.387883	0.873272	0.962,0.943	1.0,1.0	-0.048
183	ENSG00000147180.18	ZNF711	chrX	+	85246929	85247188	85246929	85247072	85247546	85247651	183	26,22	1,1	9,14	0,0	265	149	0.812237	1	0.936,0.925	1.0,1.0	-0.069
184	ENSG00000147180.18	ZNF711	chrX	+	85246929	85247188	85246929	85247183	85247546	85247651	184	2,7	20,14	0,0	2,0	154	149	1	1	0.088,0.326	0.0,NA	0.207
191	ENSG00000187325.6	TAF9B	chrX	-	78137748	78138098	78137961	78138098	78136914	78136990	191	154,277	0,1	9,7	0,0	298	149	1	1	1.0,0.993	1.0,1.0	-0.004
194	ENSG00000225470.10	JPX	chrX	+	73944317	73944465	73944317	73944414	73944583	73944662	194	99,100	2,2	77,97	1,2	200	149	0.711724	1	0.974,0.974	0.983,0.973	-0.004
195	ENSG00000225470.10	JPX	chrX	+	73944338	73944462	73944338	73944414	73944583	73944662	195	0,4	2,2	1,4	1,2	197	149	0.289246	0.705027	0.0,0.602	0.431,0.602	-0.215
197	ENSG00000225470.10	JPX	chrX	+	73946998	73947374	73946998	73947096	73984443	73985694	197	28,20	0,1	17,48	0,0	298	149	1	1	1.0,0.909	1.0,1.0	-0.045
199	ENSG00000230590.13	FTX	chrX	-	74280376	74280494	74280393	74280494	74274341	74274410	199	4,5	2,12	3,13	1,2	166	149	0.00486425	0.0245818	0.642,0.272	0.729,0.854	-0.334
209	ENSG00000147133.19	TAF1	chrX	+	71423116	71423264	71423116	71423239	71423973	71424066	209	1,2	29,28	0,6	8,4	174	149	0.0709597	0.226955	0.029,0.058	0.0,0.562	-0.238
213	ENSG00000147130.15	ZMYM3	chrX	-	71246594	71246692	71246630	71246692	71246352	71246512	213	71,93	25,10	13,14	14,1	185	149	0.473722	0.986738	0.696,0.882	0.428,0.919	0.115
214	ENSG00000147130.15	ZMYM3	chrX	-	71251557	71251601	71251581	71251601	71251177	71251244	214	77,44	4,0	9,5	0,0	173	149	0.389242	0.875014	0.943,1.0	1.0,1.0	-0.028
218	ENSG00000131080.16	EDA2R	chrX	-	66602632	66602797	66602723	66602797	66599473	66599860	218	21,9	8,10	0,0	2,2	240	149	9.41922e-06	0.000108679	0.62,0.358	0.0,0.0	0.489
222	ENSG00000102053.14	ZC3H12B	chrX	+	65366637	65366766	65366637	65366762	65368828	65368998	222	5,2	5,10	3,0	4,2	153	149	0.534091	1	0.493,0.163	0.422,0.0	0.117
223	ENSG00000102053.14	ZC3H12B	chrX	+	65398592	65398704	65398592	65398653	65445905	65446000	223	1,3	2,0	3,2	0,0	200	149	0.263686	0.65665	0.271,1.0	1.0,1.0	-0.365
224	ENSG00000102053.14	ZC3H12B	chrX	+	65398592	65398704	65398592	65398653	65488645	65489409	224	9,4	1,5	5,6	0,0	200	149	6.3642e-05	0.000591244	0.87,0.373	1.0,1.0	-0.379
227	ENSG00000102349.19	KLF8	chrX	+	56250230	56250304	56250230	56250292	56265179	56265744	227	60,65	0,0	17,14	0,1	161	149	1	1	1.0,1.0	1.0,0.928	0.036
235	ENSG00000172943.22	PHF8	chrX	-	53984907	53985227	53984913	53985227	53962843	53962939	235	0,1	95,61	3,2	13,11	155	149	0.0018693	0.0110543	0.0,0.016	0.182,0.149	-0.157
236	ENSG00000172943.22	PHF8	chrX	-	53985815	53985949	53985848	53985949	53984913	53985227	236	148,90	6,0	3,7	0,0	182	149	0.169582	0.463367	0.953,1.0	1.0,1.0	-0.024
248	ENSG00000179222.19	MAGED1	chrX	+	51852108	51852421	51852108	51852354	51894268	51894349	248	2,0	2,0	12,3	0,0	216	149	1	1	0.408,NA	1.0,1.0	-0.592
249	ENSG00000179222.19	MAGED1	chrX	+	51896408	51897086	51896408	51897077	51897207	51897271	249	0,3	179,117	0,0	9,5	158	149	1	1	0.0,0.024	0.0,0.0	0.012
252	ENSG00000171365.18	CLCN5	chrX	+	49923406	49923741	49923406	49923482	49925170	49925314	252	6,11	24,0	6,7	8,6	298	149	0.344557	0.802835	0.111,1.0	0.273,0.368	0.235
253	ENSG00000101997.14	CCDC22	chrX	+	49243117	49243184	49243117	49243181	49243283	49243462	253	38,20	1,0	2,2	0,0	152	149	1	1	0.974,1.0	1.0,1.0	-0.013
254	ENSG00000101997.14	CCDC22	chrX	+	49249166	49249262	49249166	49249238	49249508	49249568	254	40,31	0,2	3,9	0,0	173	149	0.444065	0.951038	1.0,0.93	1.0,1.0	-0.035
257	ENSG00000147144.13	CCDC120	chrX	+	49061958	49062104	49061958	49062058	49062234	49062325	257	10,3	1,0	0,1	2,0	195	149	0.00360753	0.0192395	0.884,1.0	0.0,1.0	0.442
258	ENSG00000147144.13	CCDC120	chrX	+	49061958	49062117	49061958	49062058	49062234	49062325	258	29,15	1,0	3,1	2,0	208	149	0.703882	1	0.954,1.0	0.518,1.0	0.218
260	ENSG00000147144.13	CCDC120	chrX	+	49062234	49062325	49062234	49062289	49062467	49062601	260	16,17	0,1	4,3	0,0	185	149	1	1	1.0,0.932	1.0,1.0	-0.034
262	ENSG00000068400.15	GRIPAP1	chrX	-	48983223	48983440	48983227	48983440	48982978	48983092	262	0,2	11,5	0,0	26,20	153	149	0.686539	1	0.0,0.28	0.0,0.0	0.14
263	ENSG00000068400.15	GRIPAP1	chrX	-	48983223	48983440	48983320	48983440	48982978	48983092	263	3,4	1,0	8,14	0,0	246	149	1	1	0.645,1.0	1.0,1.0	-0.177
264	ENSG00000068400.15	GRIPAP1	chrX	-	48983227	48983440	48983320	48983440	48982978	48983092	264	14,7	1,0	34,34	0,0	242	149	1	1	0.896,1.0	1.0,1.0	-0.052
265	ENSG00000068400.15	GRIPAP1	chrX	-	48988496	48989710	48989610	48989710	48988120	48988198	265	1,1	25,19	10,13	24,21	298	149	2.45218e-06	3.22344e-05	0.02,0.026	0.172,0.236	-0.181
278	ENSG00000102317.19	RBM3	chrX	+	48575560	48576083	48575560	48575667	48576313	48576419	278	67,54	602,495	48,47	37,44	298	149	0	0	0.053,0.052	0.393,0.348	-0.318
279	ENSG00000102317.19	RBM3	chrX	+	48576313	48576419	48576313	48576398	48576507	48576604	279	1030,889	5,4	160,131	1,1	170	149	1	1	0.994,0.995	0.993,0.991	0.002
280	ENSG00000068354.17	TBC1D25	chrX	+	48539713	48539932	48539713	48539920	48541332	48541442	280	0,0	18,20	0,1	3,1	161	149	1	1	0.0,0.0	0.0,0.481	-0.24
286	ENSG00000102312.25	PORCN	chrX	+	48509423	48509567	48509423	48509549	48509783	48509956	286	0,0	1,0	1,0	0,0	167	149	1	1	0.0,NA	1.0,NA	-1
287	ENSG00000102312.25	PORCN	chrX	+	48509423	48509577	48509423	48509549	48509783	48509956	287	0,0	1,0	1,0	0,0	177	149	1	1	0.0,NA	1.0,NA	-1
288	ENSG00000102312.25	PORCN	chrX	+	48509423	48509707	48509423	48509549	48509783	48509956	288	3,6	1,0	2,1	0,0	298	149	1	1	0.6,1.0	1.0,1.0	-0.2
294	ENSG00000102312.25	PORCN	chrX	+	48514239	48514398	48514239	48514365	48514524	48514625	294	0,0	16,5	2,0	1,3	182	149	0.383533	0.866123	0.0,0.0	0.621,0.0	-0.31
296	ENSG00000068438.16	FTSJ1	chrX	+	48481425	48481715	48481425	48481528	48482402	48482506	296	134,156	2,0	21,9	0,0	298	149	1	1	0.971,1.0	1.0,1.0	-0.014
297	ENSG00000102226.11	USP11	chrX	+	47245015	47245086	47245015	47245074	47245369	47245482	297	154,112	2,0	8,6	0,0	161	149	1	1	0.986,1.0	1.0,1.0	-0.007
299	ENSG00000102226.11	USP11	chrX	+	47247303	47247488	47247303	47247419	47247610	47247699	299	2,0	241,222	1,2	13,11	218	149	0.764558	1	0.006,0.0	0.05,0.111	-0.077
300	ENSG00000147123.13	NDUFB11	chrX	-	47142604	47142744	47142613	47142744	47142215	47142440	300	22,6	511,327	0,0	2,4	158	149	0.0408002	0.145668	0.039,0.017	0.0,0.0	0.028
301	ENSG00000147123.13	NDUFB11	chrX	-	47144296	47144702	47144472	47144702	47142613	47142744	301	1,0	514,303	0,0	3,3	298	149	1	1	0.001,0.0	0.0,0.0	0.001
314	ENSG00000215301.12	DDX3X	chrX	+	41337407	41339083	41337407	41337465	41341483	41341616	314	842,828	5,2	107,97	0,0	298	149	1	1	0.988,0.995	1.0,1.0	-0.008
318	ENSG00000215301.12	DDX3X	chrX	+	41344238	41344564	41344238	41344399	41345179	41345324	318	3,9	379,330	17,33	46,64	298	149	0	0	0.004,0.013	0.156,0.205	-0.172
319	ENSG00000215301.12	DDX3X	chrX	+	41347314	41347454	41347314	41347451	41347639	41349884	319	9,11	450,568	2,0	47,61	152	149	0.245846	0.621197	0.019,0.019	0.04,0.0	-0.001
327	ENSG00000123130.18	ACOT9	chrX	-	23730520	23730564	23730526	23730564	23722669	23722753	327	2,0	66,70	1,0	16,9	155	149	1	1	0.028,0.0	0.057,0.0	-0.015
328	ENSG00000123130.18	ACOT9	chrX	-	23730815	23730986	23730820	23730986	23730526	23730564	328	78,74	0,0	21,29	0,1	154	149	1	1	1.0,1.0	1.0,0.966	0.017
330	ENSG00000131828.15	PDHA1	chrX	+	19353081	19353176	19353081	19353173	19354490	19354583	330	0,4	141,128	1,0	5,6	152	149	0.735985	1	0.0,0.03	0.164,0.0	-0.067
331	ENSG00000131828.15	PDHA1	chrX	+	19353081	19353408	19353081	19353173	19354490	19354583	331	5,11	141,128	5,27	5,6	298	149	3.02647e-10	9.48681e-09	0.017,0.041	0.333,0.692	-0.483
333	ENSG00000131828.15	PDHA1	chrX	+	19355348	19355549	19355348	19355504	19355685	19355757	333	1,2	274,355	1,0	22,18	194	149	1	1	0.003,0.004	0.034,0.0	-0.014
335	ENSG00000131828.15	PDHA1	chrX	+	19358915	19359054	19358915	19359024	19359488	19359840	335	3,8	98,127	3,2	13,17	179	149	0.224083	0.579604	0.025,0.05	0.161,0.089	-0.087
336	ENSG00000044446.13	PHKA2	chrX	-	18899148	18899226	18899172	18899226	18897162	18897333	336	6,6	12,7	4,2	0,0	173	149	1.10637e-06	1.58191e-05	0.301,0.425	1.0,1.0	-0.637
338	ENSG00000044446.13	PHKA2	chrX	-	18918680	18918854	18918695	18918854	18910871	18910960	338	28,44	0,2	10,6	0,0	164	149	0.387319	0.872661	1.0,0.952	1.0,1.0	-0.024
339	ENSG00000169895.7	SYAP1	chrX	+	16719603	16719899	16719603	16719896	16735226	16735345	339	132,255	0,2	32,15	0,0	152	149	1	1	1.0,0.992	1.0,1.0	-0.004
341	ENSG00000047230.16	CTPS2	chrX	-	16712334	16712669	16712412	16712669	16702736	16702941	341	57,30	4,7	9,5	2,1	227	149	0.49869	1	0.903,0.738	0.747,0.766	0.064
342	ENSG00000047230.16	CTPS2	chrX	-	16712334	16712669	16712557	16712669	16702736	16702941	342	49,32	4,2	12,7	0,0	298	149	0.00400712	0.0208981	0.86,0.889	1.0,1.0	-0.125
343	ENSG00000047230.16	CTPS2	chrX	-	16712412	16712669	16712557	16712669	16702736	16702941	343	9,13	4,2	8,5	0,0	294	149	3.16343e-05	0.000316519	0.533,0.767	1.0,1.0	-0.35
349	ENSG00000087842.12	PIR	chrX	-	15493155	15493332	15493189	15493332	15491161	15491309	349	5,9	14,8	0,0	4,0	183	149	1	1	0.225,0.478	0.0,NA	0.351
351	ENSG00000181544.17	FANCB	chrX	-	14872985	14873064	14873006	14873064	14868922	14869043	351	10,28	7,4	8,12	8,0	170	149	0.761512	1	0.556,0.86	0.467,1.0	-0.026
353	ENSG00000046647.16	GEMIN8	chrX	-	14026048	14026221	14026139	14026221	14021463	14021511	353	2,13	9,4	4,1	0,0	240	149	1.1318e-06	1.61313e-05	0.121,0.669	1.0,1.0	-0.605
354	ENSG00000046647.16	GEMIN8	chrX	-	14026051	14026221	14026139	14026221	14021463	14021511	354	2,12	9,4	4,1	0,0	237	149	9.43607e-07	1.37329e-05	0.123,0.654	1.0,1.0	-0.611
360	ENSG00000101911.14	PRPS2	chrX	+	12799206	12799399	12799206	12799390	12809233	12809332	360	7,9	62,60	1,1	4,1	158	149	0.485113	0.999779	0.096,0.124	0.191,0.485	-0.228
374	ENSG00000291064.2	ENSG00000291064	chr22	+	50783739	50784072	50783739	50783864	50785172	50785293	374	3,5	8,10	1,0	1,0	298	149	1	1	0.158,0.2	0.333,NA	-0.154
375	ENSG00000291064.2	ENSG00000291064	chr22	+	50783762	50784072	50783762	50784021	50785172	50785293	375	2,6	3,7	2,0	0,0	200	149	1	1	0.332,0.39	1.0,NA	-0.639
376	ENSG00000291064.2	ENSG00000291064	chr22	+	50783762	50784424	50783762	50784021	50785172	50785293	376	4,11	3,7	5,0	0,0	298	149	1	1	0.4,0.44	1.0,NA	-0.58
377	ENSG00000291064.2	ENSG00000291064	chr22	+	50783762	50784424	50783762	50784072	50785172	50785293	377	4,9	1,4	6,6	1,0	298	149	0.00226652	0.0129588	0.667,0.529	0.75,1.0	-0.277
378	ENSG00000291064.2	ENSG00000291064	chr22	+	50783784	50784021	50783784	50783864	50785172	50785293	378	5,8	8,10	0,0	1,0	298	149	1	1	0.238,0.286	0.0,NA	0.262
379	ENSG00000291064.2	ENSG00000291064	chr22	+	50783784	50784424	50783784	50783864	50785172	50785293	379	2,6	8,10	0,0	1,0	298	149	1	1	0.111,0.231	0.0,NA	0.171
382	ENSG00000291064.2	ENSG00000291064	chr22	+	50783831	50784129	50783831	50784072	50785172	50785293	382	2,0	1,4	3,0	1,0	206	149	1	1	0.591,0.0	0.685,NA	-0.39
383	ENSG00000291064.2	ENSG00000291064	chr22	+	50783979	50784129	50783979	50784021	50785172	50785293	383	3,2	3,7	4,0	0,0	257	149	1	1	0.367,0.142	1.0,NA	-0.746
393	ENSG00000205560.15	CPT1B	chr22	-	50576820	50577034	50576856	50577034	50576535	50576637	393	2,1	22,17	7,7	17,13	185	149	0.000787274	0.00529476	0.068,0.045	0.249,0.302	-0.219
394	ENSG00000205560.15	CPT1B	chr22	-	50577323	50577463	50577355	50577463	50576535	50576637	394	2,6	0,0	2,5	1,0	181	149	1	1	1.0,1.0	0.622,1.0	0.189
395	ENSG00000205560.15	CPT1B	chr22	-	50577764	50577934	50577774	50577934	50577323	50577463	395	0,0	16,19	1,2	34,52	159	149	0.430771	0.940769	0.0,0.0	0.027,0.035	-0.031
396	ENSG00000205560.15	CPT1B	chr22	-	50578385	50578588	50578548	50578588	50577774	50577934	396	1,0	33,24	11,14	24,28	298	149	2.75175e-08	5.83201e-07	0.015,0.0	0.186,0.2	-0.185
402	ENSG00000025770.20	NCAPH2	chr22	+	50522670	50522720	50522670	50522717	50522820	50522922	402	91,56	2,0	13,17	0,0	152	149	1	1	0.978,1.0	1.0,1.0	-0.011
403	ENSG00000100258.19	LMF2	chr22	-	50504801	50504984	50504840	50504984	50504558	50504727	403	101,41	1,0	20,35	0,0	188	149	1	1	0.988,1.0	1.0,1.0	-0.006
405	ENSG00000100258.19	LMF2	chr22	-	50506284	50506485	50506369	50506485	50506034	50506213	405	285,216	3,4	55,49	0,10	234	149	0.00265813	0.0147738	0.984,0.972	1.0,0.757	0.099
407	ENSG00000100258.19	LMF2	chr22	-	50506777	50507035	50506781	50507035	50506637	50506666	407	0,1	91,34	0,0	22,12	153	149	1	1	0.0,0.028	0.0,0.0	0.014
412	ENSG00000100239.17	PPP6R2	chr22	+	50416091	50416210	50416091	50416157	50418866	50418979	412	7,0	53,41	2,5	21,20	202	149	0.2327	0.595873	0.089,0.0	0.066,0.156	-0.067
413	ENSG00000100239.17	PPP6R2	chr22	+	50416091	50416210	50416091	50416157	50419348	50419462	413	11,0	4,3	2,6	11,11	202	149	0.608658	1	0.67,0.0	0.118,0.287	0.133
417	ENSG00000100239.17	PPP6R2	chr22	+	50438598	50438762	50438598	50438750	50439700	50439857	417	67,42	0,0	14,25	1,0	161	149	1	1	1.0,1.0	0.928,1.0	0.036
420	ENSG00000196576.17	PLXNB2	chr22	-	50294718	50294776	50294725	50294776	50289516	50290597	420	33,8	9,2	1,6	0,0	156	149	0.000232202	0.00181966	0.778,0.793	1.0,1.0	-0.214
422	ENSG00000100429.19	HDAC10	chr22	-	50248661	50248751	50248697	50248751	50248224	50248292	422	1,0	0,2	2,3	0,0	185	149	0.0859734	0.265204	1.0,0.0	1.0,1.0	-0.5
423	ENSG00000100429.19	HDAC10	chr22	-	50248661	50248751	50248697	50248751	50248365	50248472	423	13,5	4,0	5,14	0,2	185	149	0.116096	0.339674	0.724,1.0	1.0,0.849	-0.062
424	ENSG00000100429.19	HDAC10	chr22	-	50250973	50251242	50251101	50251242	50250770	50250905	424	26,20	3,2	12,32	2,2	277	149	0.707503	1	0.823,0.843	0.763,0.896	0.003
426	ENSG00000170638.11	TRABD	chr22	+	50185912	50186045	50185912	50185976	50193026	50193093	426	0,2	68,14	0,3	19,24	218	149	0.830117	1	0.0,0.089	0.0,0.079	0.005
427	ENSG00000170638.11	TRABD	chr22	+	50185921	50186001	50185921	50185976	50193026	50193093	427	18,1	68,14	8,2	19,24	174	149	0.920866	1	0.185,0.058	0.265,0.067	-0.045
428	ENSG00000170638.11	TRABD	chr22	+	50197822	50197995	50197822	50197887	50198074	50198186	428	444,347	6,9	84,122	0,0	257	149	0.0128366	0.0559183	0.977,0.957	1.0,1.0	-0.033
430	ENSG00000198355.6	PIM3	chr22	+	49961124	49961234	49961124	49961162	49961317	49961368	430	131,67	3,0	4,6	0,0	221	149	0.474449	0.987082	0.967,1.0	1.0,1.0	-0.016
432	ENSG00000184164.16	CRELD2	chr22	+	49919229	49919312	49919229	49919300	49919729	49919840	432	22,38	2,0	0,1	1,0	161	149	0.718226	1	0.911,1.0	0.0,1.0	0.456
434	ENSG00000100425.21	BRD1	chr22	-	49798557	49798680	49798572	49798680	49797804	49798117	434	82,81	3,2	34,20	2,4	164	149	0.081586	0.254077	0.961,0.974	0.939,0.82	0.088
441	ENSG00000226328.9	NUP50-DT	chr22	-	45163517	45163858	45163666	45163858	45138823	45138916	441	13,9	0,1	6,8	0,0	298	149	1	1	1.0,0.818	1.0,1.0	-0.091
452	ENSG00000100294.14	MCAT	chr22	-	43141108	43141249	43141161	43141249	43137140	43137298	452	5,2	55,29	3,0	3,1	202	149	0.475992	0.989442	0.063,0.048	0.425,0.0	-0.157
466	ENSG00000100410.9	PHF5A	chr22	-	41468019	41468147	41468123	41468147	41467447	41467614	466	18,12	120,117	15,7	5,2	253	149	8.26783e-13	4.07259e-11	0.081,0.057	0.639,0.673	-0.587
467	ENSG00000100401.22	RANGAP1	chr22	-	41284441	41285129	41284900	41285129	41280932	41281082	467	38,31	8,7	97,115	2,1	298	149	1.51474e-07	2.72683e-06	0.704,0.689	0.96,0.983	-0.275
469	ENSG00000100401.22	RANGAP1	chr22	-	41284762	41286220	41285985	41286220	41280932	41281082	469	33,5	282,125	17,21	26,14	298	149	5.22058e-11	1.8872e-09	0.055,0.02	0.246,0.429	-0.3
470	ENSG00000100401.22	RANGAP1	chr22	-	41284762	41286220	41286085	41286220	41280932	41281082	470	261,79	9,3	37,29	0,2	298	149	0.121272	0.351618	0.935,0.929	1.0,0.879	-0.007
471	ENSG00000100401.22	RANGAP1	chr22	-	41284898	41285153	41284900	41285153	41280932	41281082	471	1,0	8,7	0,1	2,1	151	149	1	1	0.11,0.0	0.0,0.497	-0.194
472	ENSG00000100401.22	RANGAP1	chr22	-	41284900	41286187	41285543	41286187	41280932	41281082	472	27,23	24,11	44,31	0,6	298	149	2.7737e-05	0.000282892	0.36,0.511	1.0,0.721	-0.425
473	ENSG00000100401.22	RANGAP1	chr22	-	41284900	41286187	41285985	41286187	41280932	41281082	473	41,12	282,125	17,22	26,14	298	149	1.13578e-08	2.68662e-07	0.068,0.046	0.246,0.44	-0.286
474	ENSG00000100401.22	RANGAP1	chr22	-	41284900	41286187	41286085	41286187	41280932	41281082	474	269,86	9,3	37,30	0,2	298	149	0.130699	0.374112	0.937,0.935	1.0,0.882	-0.005
475	ENSG00000100401.22	RANGAP1	chr22	-	41285543	41286187	41285985	41286187	41280932	41281082	475	57,16	282,125	15,27	26,14	298	149	1.08867e-05	0.000123387	0.092,0.06	0.224,0.491	-0.281
476	ENSG00000100401.22	RANGAP1	chr22	-	41285543	41286187	41286085	41286187	41280932	41281082	476	285,90	9,3	35,35	0,2	298	149	0.149323	0.417165	0.941,0.938	1.0,0.897	-0.009
477	ENSG00000100401.22	RANGAP1	chr22	-	41285985	41286187	41286085	41286187	41280932	41281082	477	528,202	9,3	55,34	0,2	249	149	0.35596	0.819724	0.972,0.976	1.0,0.91	0.019
479	ENSG00000100401.22	RANGAP1	chr22	-	41285985	41286184	41286085	41286184	41284900	41285153	479	251,81	0,2	29,20	0,0	249	149	1	1	1.0,0.96	1.0,1.0	-0.02
480	ENSG00000100401.22	RANGAP1	chr22	-	41285985	41286220	41286085	41286220	41285362	41285518	480	251,84	1,0	31,20	0,0	249	149	1	1	0.993,1.0	1.0,1.0	-0.004
481	ENSG00000231993.3	EP300-AS1	chr22	-	41197273	41197481	41197359	41197481	41195481	41195521	481	6,11	7,0	0,2	0,0	235	149	1	1	0.352,1.0	NA,1.0	-0.324
482	ENSG00000100393.17	EP300	chr22	+	41127486	41127748	41127486	41127733	41129889	41130003	482	187,152	0,1	58,41	0,1	164	149	1	1	1.0,0.993	1.0,0.974	0.009
483	ENSG00000100387.10	RBX1	chr22	+	40964046	40964150	40964046	40964117	40967798	40967884	483	10,7	857,696	9,9	15,9	182	149	0	0	0.009,0.008	0.329,0.45	-0.381
487	ENSG00000239900.15	ADSL	chr22	+	40349831	40353117	40349831	40350035	40354247	40354327	487	239,222	3,2	36,43	0,2	298	149	0.944592	1	0.976,0.982	1.0,0.915	0.021
488	ENSG00000239900.15	ADSL	chr22	+	40358863	40359035	40358863	40358979	40359259	40359306	488	371,315	2,0	43,39	4,0	205	149	0.152946	0.425827	0.993,1.0	0.887,1.0	0.053
489	ENSG00000239900.15	ADSL	chr22	+	40361487	40361666	40361487	40361635	40362980	40363071	489	13,7	392,309	19,13	15,27	180	149	1.66533e-15	1.3697e-13	0.027,0.018	0.512,0.285	-0.376
490	ENSG00000239900.15	ADSL	chr22	+	40361487	40361677	40361487	40361635	40362980	40363071	490	21,5	392,309	19,4	15,27	191	149	9.39495e-06	0.000108538	0.04,0.012	0.497,0.104	-0.274
491	ENSG00000239900.15	ADSL	chr22	+	40361487	40361677	40361487	40361666	40362980	40363071	491	13,1	5,3	3,0	3,9	160	149	0.048695	0.167805	0.708,0.237	0.482,0.0	0.231
492	ENSG00000239900.15	ADSL	chr22	+	40362980	40363092	40362980	40363071	40364275	40364365	492	10,8	184,201	3,0	25,34	170	149	0.411526	0.91162	0.045,0.034	0.095,0.0	-0.008
494	ENSG00000100242.17	SUN2	chr22	-	38740888	38741050	38741006	38741050	38740266	38740432	494	3,6	38,17	4,7	3,0	267	149	0.000235987	0.00184128	0.042,0.165	0.427,1.0	-0.61
496	ENSG00000100242.17	SUN2	chr22	-	38751209	38751373	38751284	38751373	38750897	38751035	496	64,35	0,1	21,12	0,0	224	149	1	1	1.0,0.959	1.0,1.0	-0.02
498	ENSG00000213923.14	CSNK1E	chr22	-	38294108	38294248	38294201	38294248	38293254	38293319	498	694,566	6,4	41,49	1,0	242	149	0.924875	1	0.986,0.989	0.962,1.0	0.007
501	ENSG00000198792.14	TMEM184B	chr22	-	38272498	38273010	38272527	38273010	38247769	38248019	501	7,6	2,3	4,0	1,0	178	149	1	1	0.746,0.626	0.77,NA	-0.084
502	ENSG00000198792.14	TMEM184B	chr22	-	38272498	38273010	38272883	38273010	38247769	38248019	502	12,5	104,140	5,1	19,18	298	149	0.372436	0.847865	0.055,0.018	0.116,0.027	-0.035
503	ENSG00000198792.14	TMEM184B	chr22	-	38272527	38273010	38272883	38273010	38247769	38248019	503	7,3	104,140	2,1	19,18	298	149	0.490642	1	0.033,0.011	0.05,0.027	-0.017
504	ENSG00000100151.17	PICK1	chr22	+	38057395	38057587	38057395	38057489	38057752	38057850	504	48,43	4,3	23,20	6,6	247	149	0.00897842	0.0413838	0.879,0.896	0.698,0.668	0.204
506	ENSG00000100142.17	POLR2F	chr22	+	37956772	37956901	37956772	37956842	37959345	37959476	506	12,13	123,120	0,4	15,16	208	149	0.654315	1	0.065,0.072	0.0,0.152	-0.007
507	ENSG00000100142.17	POLR2F	chr22	+	37959345	37959476	37959345	37959431	37967098	37967170	507	238,236	0,1	17,18	0,0	194	149	1	1	1.0,0.995	1.0,1.0	-0.002
510	ENSG00000100139.15	MICALL1	chr22	+	37927410	37927826	37927410	37927820	37931798	37931933	510	135,52	21,6	26,35	3,4	155	149	0.437865	0.947492	0.861,0.893	0.893,0.894	-0.016
512	ENSG00000100083.21	GGA1	chr22	+	37616921	37617048	37616921	37616997	37618447	37618546	512	14,20	52,31	26,18	8,5	200	149	6.55837e-08	1.28656e-06	0.167,0.325	0.708,0.728	-0.472
513	ENSG00000100083.21	GGA1	chr22	+	37621615	37621738	37621615	37621696	37623326	37623467	513	1,0	55,78	2,4	33,37	191	149	0.017273	0.0717272	0.014,0.0	0.045,0.078	-0.054
514	ENSG00000100083.21	GGA1	chr22	+	37629997	37630167	37629997	37630162	37630902	37631099	514	3,2	0,0	0,1	0,1	154	149	1	1	1.0,1.0	NA,0.492	0.508
515	ENSG00000100083.21	GGA1	chr22	+	37629997	37630170	37629997	37630162	37630902	37631099	515	212,155	0,0	34,26	0,1	157	149	1	1	1.0,1.0	1.0,0.961	0.02
517	ENSG00000100083.21	GGA1	chr22	+	37629997	37630170	37629997	37630162	37630906	37631099	517	9,5	21,3	0,1	2,0	157	149	0.0457258	0.160004	0.289,0.613	0.0,1.0	-0.049
518	ENSG00000100083.21	GGA1	chr22	+	37631995	37632207	37631995	37632165	37632404	37632515	518	3,4	178,168	0,3	46,47	191	149	0.636146	1	0.013,0.018	0.0,0.047	-0.008
537	ENSG00000100150.21	DEPDC5	chr22	+	31784813	31785107	31784813	31784875	31792032	31792102	537	9,0	25,8	25,13	4,7	298	149	4.46356e-06	5.54236e-05	0.153,0.0	0.758,0.481	-0.543
538	ENSG00000100150.21	DEPDC5	chr22	+	31797599	31797703	31797599	31797699	31798581	31798656	538	37,29	0,12	17,17	2,0	153	149	0.0289706	0.110106	1.0,0.702	0.892,1.0	-0.095
539	ENSG00000100150.21	DEPDC5	chr22	+	31810520	31810665	31810520	31810641	31814991	31815212	539	0,0	36,30	1,1	21,17	173	149	0.271648	0.672929	0.0,0.0	0.039,0.048	-0.043
540	ENSG00000100150.21	DEPDC5	chr22	+	31905983	31906094	31905983	31906066	31906204	31906975	540	0,0	13,5	0,1	0,4	177	149	1	1	0.0,0.0	NA,0.174	-0.174
543	ENSG00000185133.15	INPP5J	chr22	+	31124844	31126010	31124844	31124906	31126375	31126489	543	15,25	2,0	9,18	0,0	298	149	0.776066	1	0.789,1.0	1.0,1.0	-0.105
553	ENSG00000185339.11	TCN2	chr22	+	30617329	30617754	30617329	30617495	30622967	30623083	553	0,0	1,7	0,2	0,0	298	149	1	1	0.0,0.0	NA,1.0	-1
554	ENSG00000185339.11	TCN2	chr22	+	30617329	30618109	30617329	30617495	30622967	30623083	554	0,0	1,7	0,2	0,0	298	149	1	1	0.0,0.0	NA,1.0	-1
558	ENSG00000099995.20	SF3A1	chr22	-	30346311	30346519	30346359	30346519	30344932	30345190	558	680,705	1,3	62,47	0,0	197	149	1	1	0.998,0.994	1.0,1.0	-0.004
559	ENSG00000100296.15	THOC5	chr22	-	29528273	29528466	29528425	29528466	29528077	29528177	559	5,4	79,74	23,11	15,6	298	149	1.11022e-16	1.01563e-14	0.031,0.026	0.434,0.478	-0.427
560	ENSG00000100296.15	THOC5	chr22	-	29528936	29529239	29529161	29529239	29528425	29528466	560	4,3	95,92	8,8	22,8	298	149	2.12308e-07	3.68151e-06	0.021,0.016	0.154,0.333	-0.225
561	ENSG00000100296.15	THOC5	chr22	-	29531713	29531963	29531830	29531963	29531077	29531110	561	0,0	1,2	3,6	0,2	266	149	7.34073e-08	1.42137e-06	0.0,0.0	1.0,0.627	-0.814
562	ENSG00000100296.15	THOC5	chr22	-	29543414	29543542	29543428	29543542	29542858	29542956	562	1,0	62,75	0,1	28,28	163	149	1	1	0.015,0.0	0.0,0.032	-0.009
563	ENSG00000100296.15	THOC5	chr22	-	29550552	29550843	29550727	29550843	29549051	29549158	563	0,3	20,29	6,2	5,4	298	149	0.00026685	0.00205702	0.0,0.049	0.375,0.2	-0.263
565	ENSG00000100280.18	AP1B1	chr22	-	29350034	29350150	29350046	29350150	29349217	29349383	565	184,109	3,0	20,22	0,0	161	149	1	1	0.983,1.0	1.0,1.0	-0.008
566	ENSG00000100263.15	RHBDD3	chr22	-	29265433	29265668	29265478	29265668	29263834	29264218	566	22,1	11,1	5,9	0,0	194	149	4.62215e-06	5.70765e-05	0.606,0.434	1.0,1.0	-0.48
567	ENSG00000100209.12	HSCB	chr22	+	28743881	28743978	28743881	28743923	28744614	28744704	567	82,63	0,0	26,27	0,4	204	149	0.071146	0.227469	1.0,1.0	1.0,0.831	0.085
568	ENSG00000100209.12	HSCB	chr22	+	28744614	28744709	28744614	28744704	28745863	28746008	568	6,5	38,33	2,1	6,1	154	149	0.707677	1	0.133,0.128	0.244,0.492	-0.237
569	ENSG00000100209.12	HSCB	chr22	+	28744614	28744709	28744614	28744704	28751240	28751288	569	0,0	10,0	0,1	0,0	154	149	1	1	0.0,NA	NA,1.0	-1
573	ENSG00000235954.10	TTC28-AS1	chr22	+	27997410	27998152	27997410	27997739	27998603	27998838	573	0,2	2,0	1,0	0,0	298	149	1	1	0.0,1.0	1.0,NA	-0.5
574	ENSG00000235954.10	TTC28-AS1	chr22	+	27997410	27998838	27997410	27997739	27999429	28001658	574	10,6	1,0	3,3	0,0	298	149	1	1	0.833,1.0	1.0,1.0	-0.084
581	ENSG00000100109.18	TFIP11	chr22	-	26511118	26512171	26512098	26512171	26510616	26510702	581	9,6	46,51	0,1	8,2	298	149	0.0243111	0.0957598	0.089,0.056	0.0,0.2	-0.028
589	ENSG00000184634.18	MED12	chrX	+	71126968	71127241	71126968	71127132	71127335	71128120	589	0,3	91,52	8,3	42,25	258	149	0.000368724	0.00274781	0.0,0.032	0.099,0.065	-0.066
591	ENSG00000184634.18	MED12	chrX	+	71128597	71128853	71128597	71128718	71129113	71129215	591	4,17	63,85	68,33	18,16	284	149	0	0	0.032,0.095	0.665,0.52	-0.529
592	ENSG00000184634.18	MED12	chrX	+	71135091	71135374	71135091	71135253	71136280	71136655	592	4,6	36,51	18,9	12,8	270	149	4.53797e-09	1.14278e-07	0.058,0.061	0.453,0.383	-0.359
593	ENSG00000184634.18	MED12	chrX	+	71137186	71137392	71137186	71137383	71137557	71137635	593	70,48	77,46	18,11	13,14	158	149	0.771934	1	0.462,0.496	0.566,0.426	-0.017
594	ENSG00000184634.18	MED12	chrX	+	71137186	71137392	71137186	71137383	71137560	71137635	594	7,1	2,1	0,1	1,1	158	149	0.00256115	0.0143415	0.767,0.485	0.0,0.485	0.384
607	ENSG00000215481.10	BCRP3	chr22	+	24648197	24648411	24648197	24648332	24649859	24650022	607	0,0	0,1	0,1	0,0	228	149	1	1	NA,0.0	NA,1.0	-1
617	ENSG00000099991.19	CABIN1	chr22	+	24098013	24098192	24098013	24098105	24113565	24113748	617	166,213	5,4	51,66	1,0	236	149	0.0506703	0.173315	0.954,0.971	0.97,1.0	-0.023
618	ENSG00000133460.21	SLC2A11	chr22	+	23882458	23882646	23882458	23882592	23882758	23882869	618	3,0	1,0	2,4	0,0	203	149	1	1	0.688,NA	1.0,1.0	-0.312
622	ENSG00000228315.13	GUSBP11	chr22	-	23659711	23660000	23659864	23660000	23638486	23638942	622	3,10	28,21	15,18	12,6	298	149	4.83443e-05	0.000461071	0.051,0.192	0.385,0.6	-0.371
627	ENSG00000228315.13	GUSBP11	chr22	-	23652718	23652944	23652860	23652944	23652478	23652576	627	12,10	2,0	19,25	4,3	291	149	0.0800601	0.25052	0.754,1.0	0.709,0.81	0.117
636	ENSG00000228315.13	GUSBP11	chr22	-	23690231	23690356	23690235	23690356	23659864	23660000	636	1,0	0,1	1,0	0,0	153	149	1	1	1.0,0.0	1.0,NA	-0.5
641	ENSG00000228315.13	GUSBP11	chr22	-	23686830	23686995	23686837	23686995	23683724	23683867	641	3,9	2,7	7,2	3,8	156	149	0.432862	0.94369	0.589,0.551	0.69,0.193	0.129
642	ENSG00000228315.13	GUSBP11	chr22	-	23690231	23690356	23690235	23690356	23683724	23683867	642	8,1	1,4	9,10	6,6	153	149	0.941969	1	0.886,0.196	0.594,0.619	-0.066
643	ENSG00000228315.13	GUSBP11	chr22	-	23694118	23695517	23695172	23695517	23683724	23683867	643	87,98	2,0	74,59	0,0	298	149	0.662738	1	0.956,1.0	1.0,1.0	-0.022
646	ENSG00000228315.13	GUSBP11	chr22	-	23694118	23695517	23695172	23695517	23690231	23690356	646	89,99	0,4	79,63	0,0	298	149	0.374962	0.852317	1.0,0.925	1.0,1.0	-0.037
647	ENSG00000228315.13	GUSBP11	chr22	-	23695133	23695517	23695172	23695517	23690231	23690356	647	8,12	0,4	10,8	0,0	188	149	0.0166547	0.0695759	1.0,0.704	1.0,1.0	-0.148
651	ENSG00000228315.13	GUSBP11	chr22	-	23716960	23717337	23717030	23717337	23715008	23715194	651	0,0	49,30	0,1	20,34	219	149	1	1	0.0,0.0	0.0,0.02	-0.01
652	ENSG00000228315.13	GUSBP11	chr22	-	23716960	23717337	23717107	23717337	23715008	23715194	652	14,13	18,4	8,24	19,4	296	149	0.926422	1	0.281,0.621	0.175,0.751	-0.012
653	ENSG00000228315.13	GUSBP11	chr22	-	23717030	23717307	23717107	23717307	23715008	23715194	653	63,43	18,4	28,57	19,4	226	149	0.699579	1	0.698,0.876	0.493,0.904	0.088
659	ENSG00000100030.16	MAPK1	chr22	-	21805840	21806039	21805849	21806039	21799011	21799128	659	0,0	152,164	0,3	20,24	158	149	0.574193	1	0.0,0.0	0.0,0.105	-0.052
663	ENSG00000099949.23	LZTR1	chr22	+	20983026	20983122	20983026	20983089	20985840	20985897	663	3,10	91,72	5,1	33,43	182	149	0.717513	1	0.026,0.102	0.11,0.019	-0.001
664	ENSG00000099949.23	LZTR1	chr22	+	20990385	20990969	20990385	20990525	20991627	20991829	664	7,5	93,55	8,16	27,53	298	149	0.000507941	0.00362783	0.036,0.043	0.129,0.131	-0.091
665	ENSG00000099949.23	LZTR1	chr22	+	20992793	20992904	20992793	20992897	20993661	20993754	665	43,10	1,0	16,20	0,2	156	149	0.48821	1	0.976,1.0	1.0,0.905	0.035
675	ENSG00000249923.2	LINC02891	chr22	-	20209047	20209316	20209144	20209316	20207972	20208063	675	15,10	1,3	1,5	0,0	246	149	0.00832207	0.0387169	0.901,0.669	1.0,1.0	-0.215
684	ENSG00000183597.17	TANGO2	chr22	+	20021068	20021246	20021068	20021134	20036759	20036854	684	13,0	7,2	2,0	0,0	261	149	1	1	0.515,0.0	1.0,NA	-0.742
685	ENSG00000183597.17	TANGO2	chr22	+	20021154	20021428	20021154	20021298	20036759	20036854	685	9,7	0,0	6,1	4,0	279	149	0.00406323	0.021117	1.0,1.0	0.445,1.0	0.277
688	ENSG00000183597.17	TANGO2	chr22	+	20036759	20037094	20036759	20036854	20043354	20043443	688	16,24	18,18	21,6	5,1	298	149	0.00235587	0.0134098	0.308,0.4	0.677,0.75	-0.36
689	ENSG00000183597.17	TANGO2	chr22	+	20061529	20061706	20061529	20061683	20063337	20063442	689	1,1	17,15	2,0	4,0	172	149	1	1	0.048,0.055	0.302,NA	-0.251
690	ENSG00000099889.15	ARVCF	chr22	-	19977414	19977586	19977429	19977586	19975685	19975757	690	8,7	1,0	5,5	0,0	164	149	1	1	0.879,1.0	1.0,1.0	-0.06
691	ENSG00000093010.16	COMT	chr22	+	19963565	19963957	19963565	19963759	19964167	19964299	691	5,1	136,125	0,2	3,6	298	149	0.615837	1	0.018,0.004	0.0,0.143	-0.06
693	ENSG00000100075.11	SLC25A1	chr22	-	19176574	19176693	19176577	19176693	19176420	19176494	693	1,0	164,127	0,1	5,4	152	149	1	1	0.006,0.0	0.0,0.197	-0.096
696	ENSG00000100075.11	SLC25A1	chr22	-	19176843	19176950	19176845	19176950	19176420	19176494	696	2,4	9,1	2,0	0,0	151	149	1	1	0.18,0.798	1.0,NA	-0.511
698	ENSG00000100075.11	SLC25A1	chr22	-	19177687	19177865	19177726	19177865	19177119	19177204	698	7,5	145,130	3,1	6,5	188	149	0.0833319	0.258681	0.037,0.03	0.284,0.137	-0.177
699	ENSG00000100075.11	SLC25A1	chr22	-	19177717	19177865	19177726	19177865	19177119	19177204	699	3,2	145,130	1,0	6,5	158	149	0.748006	1	0.019,0.014	0.136,0.0	-0.052
700	ENSG00000100075.11	SLC25A1	chr22	-	19177726	19178041	19177941	19178041	19177119	19177204	700	147,130	0,2	6,9	0,0	298	149	1	1	1.0,0.97	1.0,1.0	-0.015
706	ENSG00000184979.13	USP18	chr22	+	18157557	18157859	18157557	18157820	18160171	18160268	706	2,3	10,11	0,0	1,0	188	149	1	1	0.137,0.178	0.0,NA	0.158
723	ENSG00000142173.18	COL6A2	chr21	+	46121060	46121165	46121060	46121123	46121555	46121618	723	1,0	30,2	1,1	2,3	191	149	0.158943	0.438844	0.025,0.0	0.281,0.206	-0.231
724	ENSG00000142156.17	COL6A1	chr21	+	46003390	46003998	46003390	46003857	46004575	46004908	724	174,134	0,0	22,24	2,0	290	149	0.756421	1	1.0,1.0	0.85,1.0	0.075
726	ENSG00000223768.5	LINC00205	chr21	+	45288975	45289911	45288975	45289438	45290470	45290579	726	11,16	15,25	4,12	2,6	298	149	0.031087	0.116268	0.268,0.242	0.5,0.5	-0.245
730	ENSG00000184900.17	SUMO3	chr21	-	44808996	44809118	44809046	44809118	44805616	44807040	730	6,2	286,325	5,0	10,8	199	149	0.00538451	0.0268477	0.015,0.005	0.272,0.0	-0.126
731	ENSG00000184900.17	SUMO3	chr21	-	44813861	44814104	44813975	44814104	44809046	44809118	731	2,3	341,338	2,1	7,9	263	149	0.426736	0.935559	0.003,0.005	0.139,0.059	-0.095
734	ENSG00000160214.14	RRP1	chr21	+	43797906	43798100	43797906	43798049	43799569	43799649	734	128,84	4,4	38,27	0,1	200	149	0.0379919	0.136786	0.96,0.94	1.0,0.953	-0.026
739	ENSG00000160200.19	CBS	chr21	-	43073265	43073341	43073270	43073341	43071984	43072201	739	1,5	1,0	2,3	0,0	154	149	1	1	0.492,1.0	1.0,1.0	-0.254
744	ENSG00000160200.19	CBS	chr21	-	43075334	43075769	43075480	43075769	43073265	43073341	744	0,1	0,0	0,1	0,2	295	149	1	1	NA,1.0	NA,0.202	0.798
747	ENSG00000160200.19	CBS	chr21	-	43075480	43075829	43075769	43075829	43073265	43073341	747	0,0	1,0	0,2	0,0	298	149	1	1	0.0,NA	NA,1.0	-1
754	ENSG00000157557.14	ETS2	chr21	+	38805970	38806808	38805970	38806120	38810034	38810106	754	1,4	98,53	0,1	4,3	298	149	0.63375	1	0.005,0.036	0.0,0.143	-0.051
755	ENSG00000157557.14	ETS2	chr21	+	38819502	38819871	38819502	38819766	38821585	38821704	755	1,1	98,47	1,1	5,4	254	149	0.251036	0.63145	0.006,0.012	0.105,0.128	-0.107
764	ENSG00000182670.14	TTC3	chr21	+	37197881	37198025	37197881	37198016	37200231	37200324	764	162,97	0,1	21,39	0,0	158	149	1	1	1.0,0.989	1.0,1.0	-0.006
765	ENSG00000159267.18	HLCS	chr21	-	36947332	36948287	36948165	36948287	36938831	36938994	765	9,7	6,1	1,1	2,0	298	149	0.854502	1	0.429,0.778	0.2,1.0	0.004
767	ENSG00000159259.9	CHAF1B	chr21	+	36409373	36409558	36409373	36409465	36411462	36411604	767	9,1	204,116	1,14	13,7	242	149	0.000352686	0.00264367	0.026,0.005	0.045,0.552	-0.283
769	ENSG00000227456.10	LINC00310	chr21	+	34262819	34262938	34262819	34262921	34293680	34293756	769	0,0	3,3	0,1	1,2	166	149	1	1	0.0,0.0	0.0,0.31	-0.155
770	ENSG00000241837.8	ATP5PO	chr21	-	33903913	33904021	33903934	33904021	33903457	33903639	770	3,9	1081,810	0,2	17,18	170	149	0.488177	1	0.002,0.01	0.0,0.089	-0.038
771	ENSG00000241837.8	ATP5PO	chr21	-	33906448	33907453	33907340	33907453	33903934	33904021	771	12,4	877,641	3,6	14,14	298	149	6.61378e-06	7.95873e-05	0.007,0.003	0.097,0.176	-0.132
777	ENSG00000241837.8	ATP5PO	chr21	-	33915135	33915724	33915651	33915724	33914449	33914500	777	11,1	0,4	3,4	0,0	298	149	0.00674172	0.0325119	1.0,0.111	1.0,1.0	-0.445
778	ENSG00000241837.8	ATP5PO	chr21	-	33915383	33915779	33915727	33915779	33914449	33914500	778	3,0	473,296	2,0	9,13	298	149	0.685144	1	0.003,0.0	0.1,0.0	-0.049
779	ENSG00000159147.19	DONSON	chr21	-	33581301	33581500	33581445	33581500	33579349	33579562	779	119,148	0,2	48,55	0,0	293	149	1	1	1.0,0.974	1.0,1.0	-0.013
785	ENSG00000166979.14	EVA1C	chr21	+	32501414	32501538	32501414	32501495	32503925	32504015	785	0,0	1,0	1,0	0,0	192	149	1	1	0.0,NA	1.0,NA	-1
790	ENSG00000156253.8	RWDD2B	chr21	-	29008239	29008621	29008394	29008621	29007760	29008123	790	13,6	9,3	1,1	0,0	298	149	9.32633e-06	0.000107885	0.419,0.5	1.0,1.0	-0.54
794	ENSG00000142192.23	APP	chr21	-	25975036	25975228	25975069	25975228	25955626	25955755	794	1,0	518,453	3,5	48,36	182	149	0.00117134	0.0073951	0.002,0.0	0.049,0.102	-0.074
800	ENSG00000154723.14	ATP5PF	chr21	-	25734169	25734375	25734332	25734375	25729630	25729801	800	6,4	4,21	0,2	0,1	298	149	1	1	0.429,0.087	NA,0.5	-0.242
801	ENSG00000154723.14	ATP5PF	chr21	-	25734938	25735030	25734988	25735030	25729630	25729801	801	18,12	81,90	0,0	3,0	199	149	1	1	0.143,0.091	0.0,NA	0.117
802	ENSG00000154723.14	ATP5PF	chr21	-	25734988	25735389	25735314	25735389	25729630	25729801	802	217,201	139,113	11,6	1,5	298	149	0.355613	0.819666	0.438,0.471	0.846,0.375	-0.156
807	ENSG00000154640.16	BTG3	chr21	-	17610775	17611774	17611619	17611774	17608971	17609152	807	82,68	2,3	22,12	0,0	298	149	0.0370145	0.133967	0.953,0.919	1.0,1.0	-0.064
810	ENSG00000154640.16	BTG3	chr21	-	17611576	17611774	17611619	17611774	17608971	17609152	810	30,19	2,3	3,3	0,0	192	149	0.011189	0.0497075	0.921,0.831	1.0,1.0	-0.124
812	ENSG00000154640.16	BTG3	chr21	-	17611594	17611774	17611619	17611774	17608971	17609152	812	18,6	2,3	1,1	0,0	174	149	0.00151927	0.00925918	0.885,0.631	1.0,1.0	-0.242
821	ENSG00000157538.15	VPS26C	chr21	-	37228156	37228373	37228222	37228373	37227653	37227806	821	1,3	63,83	1,0	9,10	215	149	1	1	0.011,0.024	0.071,0.0	-0.018
826	ENSG00000101844.19	ATG4A	chrX	+	108137803	108137991	108137803	108137884	108150151	108150297	826	7,8	1,0	3,4	0,0	256	149	1	1	0.803,1.0	1.0,1.0	-0.099
827	ENSG00000101844.19	ATG4A	chrX	+	108138112	108138212	108138112	108138191	108150151	108150297	827	0,0	18,20	1,2	6,0	170	149	0.0201297	0.0812897	0.0,0.0	0.127,1.0	-0.564
828	ENSG00000101844.19	ATG4A	chrX	+	108151801	108152005	108151801	108151858	108152978	108153087	828	1,0	72,66	0,1	5,3	296	149	1	1	0.007,0.0	0.0,0.144	-0.068
838	ENSG00000155966.14	AFF2	chrX	+	148651998	148652131	148651998	148652119	148661907	148662768	838	3,0	15,7	0,0	4,1	161	149	0.242696	0.61677	0.156,0.0	0.0,0.0	0.078
839	ENSG00000155966.14	AFF2	chrX	+	148843381	148843433	148843381	148843415	148885888	148885985	839	3,4	2,21	0,0	1,3	167	149	0.000357101	0.0026723	0.572,0.145	0.0,0.0	0.358
847	ENSG00000101150.19	TPD52L2	chr20	+	63869295	63869441	63869295	63869366	63873667	63873816	847	287,204	0,1	30,65	0,1	224	149	1	1	1.0,0.993	1.0,0.977	0.008
848	ENSG00000101150.19	TPD52L2	chr20	+	63873667	63873816	63873667	63873805	63882749	63882820	848	7,13	1,0	1,1	0,0	160	149	1	1	0.867,1.0	1.0,1.0	-0.067
850	ENSG00000197114.13	ZGPAT	chr20	+	63708038	63708188	63708038	63708118	63708552	63709164	850	3,0	15,8	2,1	9,9	219	149	0.543334	1	0.12,0.0	0.131,0.07	-0.041
851	ENSG00000197114.13	ZGPAT	chr20	+	63708552	63709164	63708552	63708979	63733218	63733352	851	96,29	2,0	29,65	1,2	298	149	0.330462	0.777176	0.96,1.0	0.935,0.942	0.041
852	ENSG00000197114.13	ZGPAT	chr20	+	63733218	63733439	63733218	63733352	63733586	63733739	852	2,0	68,39	3,2	45,28	236	149	0.148133	0.414357	0.018,0.0	0.04,0.043	-0.032
855	ENSG00000197114.13	ZGPAT	chr20	+	63733586	63733775	63733586	63733739	63734644	63734824	855	1,0	1,1	2,14	0,0	185	149	0.00121825	0.00763218	0.446,0.0	1.0,1.0	-0.777
856	ENSG00000197114.13	ZGPAT	chr20	+	63733586	63733739	63733586	63733712	63734704	63734824	856	39,49	2,6	21,15	3,1	176	149	0.763237	1	0.943,0.874	0.856,0.927	0.017
857	ENSG00000197114.13	ZGPAT	chr20	+	63733586	63733775	63733586	63733712	63734704	63734824	857	14,24	2,6	12,20	3,1	212	149	0.294307	0.714062	0.831,0.738	0.738,0.934	-0.052
858	ENSG00000197114.13	ZGPAT	chr20	+	63733586	63733775	63733586	63733739	63734704	63734824	858	1,1	26,26	2,14	11,9	185	149	8.32829e-05	0.000747633	0.03,0.03	0.128,0.556	-0.312
861	ENSG00000101246.21	ARFRP1	chr20	-	63702099	63702217	63702135	63702217	63701829	63701900	861	0,0	26,24	2,2	7,5	185	149	0.00759849	0.0358529	0.0,0.0	0.187,0.244	-0.215
862	ENSG00000101246.21	ARFRP1	chr20	-	63707660	63707900	63707866	63707900	63706998	63707092	862	1,0	8,4	3,2	1,10	298	149	0.00971475	0.0441423	0.059,0.0	0.6,0.091	-0.316
864	ENSG00000026036.23	RTEL1-TNFRSF6B	chr20	+	63689749	63690210	63689749	63689865	63690293	63690441	864	48,19	1,0	37,42	0,4	298	149	0.0789586	0.247852	0.96,1.0	1.0,0.84	0.06
865	ENSG00000026036.23	RTEL1-TNFRSF6B	chr20	+	63695327	63695650	63695327	63695480	63695777	63695854	865	48,14	27,6	14,28	13,21	298	149	0.193424	0.515779	0.471,0.538	0.35,0.4	0.129
866	ENSG00000258366.13	RTEL1	chr20	+	63658293	63658466	63658293	63658459	63659232	63659504	866	62,48	25,5	61,72	14,21	156	149	0.835762	1	0.703,0.902	0.806,0.766	0.016
867	ENSG00000258366.13	RTEL1	chr20	+	63673939	63674093	63673939	63674051	63678144	63678183	867	42,45	2,0	20,45	2,1	191	149	0.444576	0.95145	0.942,1.0	0.886,0.972	0.042
868	ENSG00000258366.13	RTEL1	chr20	+	63687637	63687803	63687637	63687770	63687936	63688050	868	3,0	14,11	7,0	15,22	182	149	0.290103	0.706515	0.149,0.0	0.276,0.0	-0.064
872	ENSG00000101187.17	SLCO4A1	chr20	+	62668476	62668604	62668476	62668541	62668929	62669078	872	17,14	32,40	3,5	6,12	212	149	0.796047	1	0.272,0.197	0.26,0.227	-0.009
886	ENSG00000101181.19	MTG2	chr20	+	62193415	62193678	62193415	62193624	62195801	62195949	886	0,2	45,25	4,7	11,8	203	149	3.00083e-06	3.85975e-05	0.0,0.055	0.211,0.391	-0.273
887	ENSG00000101181.19	MTG2	chr20	+	62199118	62199283	62199118	62199257	62200682	62203568	887	4,5	88,64	2,2	14,13	175	149	0.668224	1	0.037,0.062	0.108,0.116	-0.062
888	ENSG00000184402.15	SS18L1	chr20	+	62158671	62158942	62158671	62158748	62159876	62159961	888	13,3	33,55	16,16	20,19	298	149	8.88701e-05	0.000791182	0.165,0.027	0.286,0.296	-0.195
889	ENSG00000101182.16	PSMA7	chr20	-	62139695	62139905	62139780	62139905	62139074	62139197	889	13,10	612,393	2,9	11,18	234	149	7.63343e-07	1.14438e-05	0.013,0.016	0.104,0.241	-0.158
890	ENSG00000130699.20	TAF4	chr20	-	62006509	62006758	62006545	62006758	62003730	62003878	890	155,85	0,1	33,21	0,0	185	149	1	1	1.0,0.986	1.0,1.0	-0.007
895	ENSG00000228340.9	MIR646HG	chr20	+	60154406	60154506	60154406	60154501	60180834	60180913	895	1,1	4,4	1,1	1,11	154	149	0.551612	1	0.195,0.195	0.492,0.081	-0.091
899	ENSG00000101158.16	NELFCD	chr20	+	58989857	58990232	58989857	58989988	58990909	58991075	899	15,17	170,71	23,39	0,3	298	149	0	0	0.042,0.107	1.0,0.867	-0.859
900	ENSG00000101158.16	NELFCD	chr20	+	58993623	58993764	58993623	58993675	58994109	58994191	900	249,295	8,5	13,14	0,0	238	149	0.0246227	0.0966474	0.951,0.974	1.0,1.0	-0.038
904	ENSG00000124222.24	STX16	chr20	+	58652072	58652138	58652072	58652087	58659622	58659634	904	21,25	25,16	14,10	12,19	200	149	0.364306	0.833588	0.385,0.538	0.465,0.282	0.088
905	ENSG00000124222.24	STX16	chr20	+	58667489	58667608	58667489	58667597	58667986	58668127	905	2,0	86,109	2,0	84,73	160	149	1	1	0.021,0.0	0.022,0.0	0
908	ENSG00000101138.13	CSTF1	chr20	+	56395520	56395759	56395520	56395721	56397206	56397484	908	6,6	85,93	6,2	9,5	187	149	0.00125183	0.00783158	0.053,0.049	0.347,0.242	-0.243
912	ENSG00000000419.15	DPM1	chr20	-	50941104	50941209	50941128	50941209	50940864	50940933	912	5,9	9,15	0,2	0,0	173	149	1	1	0.324,0.341	NA,1.0	-0.667
913	ENSG00000000419.15	DPM1	chr20	-	50941104	50941209	50941128	50941209	50940864	50940955	913	0,2	0,1	0,2	0,0	173	149	1	1	NA,0.633	NA,1.0	-0.367
914	ENSG00000000419.15	DPM1	chr20	-	50945736	50945923	50945839	50945923	50942030	50942126	914	67,161	1,3	14,20	0,0	252	149	0.737455	1	0.975,0.969	1.0,1.0	-0.028
915	ENSG00000000419.15	DPM1	chr20	-	50945736	50945923	50945846	50945923	50942030	50942126	915	67,163	1,8	14,20	5,0	259	149	0.222817	0.577829	0.975,0.921	0.617,1.0	0.139
916	ENSG00000000419.15	DPM1	chr20	-	50945839	50945923	50945846	50945923	50942030	50942126	916	1,5	1,8	0,0	5,0	156	149	1	1	0.489,0.374	0.0,NA	0.431
920	ENSG00000177410.14	ZFAS1	chr20	+	49278635	49278738	49278635	49278716	49279103	49279208	920	14,10	139,176	0,0	11,12	171	149	0.00276963	0.0153081	0.081,0.047	0.0,0.0	0.064
926	ENSG00000177410.14	ZFAS1	chr20	+	49280484	49280574	49280484	49280570	49289044	49289260	926	2,4	87,70	3,6	5,0	153	149	8.55431e-06	9.97262e-05	0.022,0.053	0.369,1.0	-0.647
927	ENSG00000177410.14	ZFAS1	chr20	+	49280484	49280964	49280484	49280570	49289044	49289260	927	52,73	87,70	30,37	5,0	298	149	1.39619e-09	3.92378e-08	0.23,0.343	0.75,1.0	-0.589
931	ENSG00000124207.18	CSE1L	chr20	+	49063201	49063344	49063201	49063293	49066191	49066293	931	660,737	1,0	93,72	0,0	200	149	1	1	0.998,1.0	1.0,1.0	-0.001
933	ENSG00000124207.18	CSE1L	chr20	+	49089537	49089746	49089537	49089677	49090741	49090839	933	533,1101	4,4	100,41	0,2	218	149	0.951317	1	0.989,0.995	1.0,0.933	0.025
941	ENSG00000101040.21	ZMYND8	chr20	-	47238757	47239138	47238895	47239138	47236325	47236516	941	27,31	63,56	15,6	10,8	287	149	0.0514137	0.175323	0.182,0.223	0.438,0.28	-0.156
942	ENSG00000100219.18	XBP1	chr22	-	28799041	28799153	28799056	28799153	28797076	28797205	942	2,0	98,135	0,0	1,2	164	149	1	1	0.018,0.0	0.0,0.0	0.009
945	ENSG00000062598.19	ELMO2	chr20	-	46393980	46394089	46394048	46394089	46393528	46393601	945	2,2	32,21	2,1	3,6	217	149	0.501478	1	0.041,0.061	0.314,0.103	-0.157
949	ENSG00000198026.9	ZNF335	chr20	-	45957543	45957680	45957585	45957680	45953688	45953948	949	0,0	18,10	1,0	0,0	191	149	1	1	0.0,0.0	1.0,NA	-1
951	ENSG00000064601.22	CTSA	chr20	+	45891547	45891822	45891547	45891762	45891915	45892027	951	2,0	87,51	9,0	4,12	209	149	0.00240041	0.0136032	0.016,0.0	0.616,0.0	-0.3
952	ENSG00000064601.22	CTSA	chr20	+	45892397	45892601	45892397	45892484	45892724	45892880	952	1,4	136,95	0,1	7,20	266	149	1	1	0.004,0.023	0.0,0.027	0
953	ENSG00000064601.22	CTSA	chr20	+	45892397	45892637	45892397	45892484	45892724	45892880	953	1,4	136,95	0,2	7,20	298	149	0.344453	0.802835	0.004,0.021	0.0,0.048	-0.011
955	ENSG00000064601.22	CTSA	chr20	+	45892724	45892887	45892724	45892880	45893219	45893311	955	1,4	195,158	1,2	10,17	156	149	0.324409	0.766356	0.005,0.024	0.087,0.101	-0.08
956	ENSG00000064601.22	CTSA	chr20	+	45892724	45892882	45892724	45892880	45893987	45894072	956	0,4	2,0	0,1	3,1	151	149	0.027573	0.106012	0.0,1.0	0.0,0.497	0.252
957	ENSG00000064601.22	CTSA	chr20	+	45892724	45893311	45892724	45892880	45893987	45894072	957	288,246	2,0	45,49	3,1	298	149	0.108667	0.321411	0.986,1.0	0.882,0.961	0.072
958	ENSG00000064601.22	CTSA	chr20	+	45892724	45893311	45892724	45892882	45893987	45894072	958	288,244	0,2	45,49	0,1	298	149	1	1	1.0,0.984	1.0,0.961	0.012
961	ENSG00000064601.22	CTSA	chr20	+	45894993	45895138	45894993	45895133	45896964	45898109	961	1,3	133,150	4,0	7,10	154	149	0.0310674	0.116268	0.007,0.019	0.356,0.0	-0.165
968	ENSG00000175063.18	UBE2C	chr20	+	45815540	45815745	45815540	45815655	45815853	45815913	968	971,872	2,1	49,71	0,0	239	149	1	1	0.997,0.998	1.0,1.0	-0.002
969	ENSG00000101457.14	DNTTIP1	chr20	+	45801073	45801196	45801073	45801142	45801401	45801458	969	6,2	77,75	0,0	9,5	203	149	0.0595851	0.197078	0.054,0.019	0.0,0.0	0.036
970	ENSG00000101457.14	DNTTIP1	chr20	+	45801998	45802057	45801998	45802055	45803332	45803378	970	174,154	0,0	7,3	1,0	151	149	1	1	1.0,1.0	0.874,1.0	0.063
971	ENSG00000177189.15	RPS6KA3	chrX	-	20164892	20165060	20164898	20165060	20162963	20163040	971	0,0	62,85	2,0	6,6	155	149	0.743588	1	0.0,0.0	0.243,0.0	-0.121
972	ENSG00000124155.20	PIGT	chr20	+	45416516	45416694	45416516	45416654	45418771	45418979	972	49,49	0,0	9,9	3,0	189	149	0.123184	0.356816	1.0,1.0	0.703,1.0	0.149
973	ENSG00000124155.20	PIGT	chr20	+	45416516	45416664	45416516	45416654	45418851	45418979	973	10,22	1,0	1,5	0,0	159	149	1	1	0.904,1.0	1.0,1.0	-0.048
974	ENSG00000124155.20	PIGT	chr20	+	45416516	45416694	45416516	45416654	45418851	45418979	974	366,401	1,0	26,20	0,0	189	149	1	1	0.997,1.0	1.0,1.0	-0.002
976	ENSG00000124155.20	PIGT	chr20	+	45416516	45416694	45416516	45416654	45419294	45419395	976	50,52	0,1	10,11	1,0	189	149	1	1	1.0,0.976	0.887,1.0	0.044
977	ENSG00000124155.20	PIGT	chr20	+	45416516	45418979	45416516	45416654	45419294	45419395	977	210,211	0,1	36,20	1,0	298	149	1	1	1.0,0.991	0.947,1.0	0.022
978	ENSG00000124155.20	PIGT	chr20	+	45416516	45418979	45416516	45416694	45419294	45419395	978	169,167	3,3	28,13	1,2	298	149	0.492088	1	0.966,0.965	0.933,0.765	0.117
979	ENSG00000124155.20	PIGT	chr20	+	45419503	45419638	45419503	45419590	45420135	45420223	979	5,5	231,166	0,3	23,17	197	149	0.866637	1	0.016,0.022	0.0,0.118	-0.04
981	ENSG00000124155.20	PIGT	chr20	+	45420527	45421583	45420527	45420693	45424215	45424381	981	153,121	5,1	10,17	0,0	298	149	0.0725845	0.231164	0.939,0.984	1.0,1.0	-0.038
985	ENSG00000124155.20	PIGT	chr20	+	45421382	45421583	45421382	45421565	45424215	45424381	985	144,117	0,1	8,2	0,0	167	149	1	1	1.0,0.991	1.0,1.0	-0.004
986	ENSG00000124155.20	PIGT	chr20	+	45421382	45421664	45421382	45421565	45424215	45424381	986	32,13	0,1	16,8	0,0	248	149	1	1	1.0,0.886	1.0,1.0	-0.057
987	ENSG00000124155.20	PIGT	chr20	+	45421382	45421664	45421382	45421583	45424215	45424381	987	14,6	126,110	11,8	3,2	230	149	2.90878e-14	1.93165e-12	0.067,0.034	0.704,0.722	-0.662
988	ENSG00000244274.10	DBNDD2	chr20	+	45408800	45409036	45408800	45408938	45409931	45410610	988	23,11	108,74	2,4	4,7	247	149	0.268849	0.667284	0.114,0.082	0.232,0.256	-0.146
989	ENSG00000101104.14	PABPC1L	chr20	+	44935390	44935502	44935390	44935497	44936636	44936730	989	0,1	21,27	0,1	36,38	154	149	1	1	0.0,0.035	0.0,0.025	0.005
993	ENSG00000101057.17	MYBL2	chr20	+	43711487	43711610	43711487	43711601	43713001	43713106	993	1,2	336,310	0,0	26,27	158	149	1	1	0.003,0.006	0.0,0.0	0.005
994	ENSG00000101052.14	IFT52	chr20	+	43590936	43591054	43590936	43591029	43594692	43594817	994	10,20	8,1	4,4	1,0	174	149	0.00828679	0.0385928	0.517,0.945	0.774,1.0	-0.156
995	ENSG00000101052.14	IFT52	chr20	+	43605001	43605216	43605001	43605073	43613849	43613976	995	5,9	39,18	0,10	2,3	292	149	0.333009	0.781936	0.061,0.203	0.0,0.63	-0.183
1001	ENSG00000174306.23	ZHX3	chr20	-	41268978	41269083	41268989	41269083	41202056	41205066	1001	3,2	0,2	2,0	4,0	160	149	1	1	1.0,0.482	0.318,NA	0.423
1003	ENSG00000174306.23	ZHX3	chr20	-	41268978	41269083	41268989	41269083	41267462	41267612	1003	0,1	1,0	0,0	6,0	160	149	1	1	0.0,1.0	0.0,NA	0.5
1014	ENSG00000130703.18	OSBPL2	chr20	+	62242320	62242661	62242320	62242434	62256056	62256221	1014	4,5	2,0	8,6	0,0	298	149	0.455836	0.963814	0.5,1.0	1.0,1.0	-0.25
1015	ENSG00000130703.18	OSBPL2	chr20	+	62242320	62242717	62242320	62242434	62256056	62256221	1015	4,5	2,0	8,6	0,0	298	149	0.455836	0.963814	0.5,1.0	1.0,1.0	-0.25
1021	ENSG00000149636.17	DSN1	chr20	-	36770872	36771473	36771424	36771473	36767968	36768042	1021	70,54	5,1	28,27	0,0	298	149	0.00775799	0.0364686	0.875,0.964	1.0,1.0	-0.081
1022	ENSG00000149636.17	DSN1	chr20	-	36773393	36773746	36773661	36773746	36771424	36771473	1022	32,32	33,30	16,20	3,5	298	149	0.000152653	0.00127424	0.327,0.348	0.727,0.667	-0.36
1024	ENSG00000149636.17	DSN1	chr20	-	36773480	36773763	36773661	36773763	36771424	36771473	1024	20,20	33,30	13,20	3,5	298	149	4.32589e-06	5.40134e-05	0.233,0.25	0.684,0.667	-0.434
1026	ENSG00000101084.20	RAB5IF	chr20	+	36609600	36609758	36609600	36609730	36612009	36612557	1026	10,4	181,144	2,0	5,9	177	149	0.489494	1	0.044,0.023	0.252,0.0	-0.092
1027	ENSG00000131043.14	AAR2	chr20	+	36236477	36236782	36236477	36236503	36236881	36236966	1027	6,5	3,0	2,0	0,0	298	149	1	1	0.5,1.0	1.0,NA	-0.25
1028	ENSG00000131043.14	AAR2	chr20	+	36236881	36237037	36236881	36236966	36239820	36240625	1028	3,6	6,1	3,2	0,0	220	149	2.25225e-05	0.000235058	0.253,0.803	1.0,1.0	-0.472
1031	ENSG00000131051.25	RBM39	chr20	-	35740805	35740887	35740823	35740887	35738967	35739017	1031	10,5	217,398	5,8	10,20	167	149	1.34165e-08	3.09997e-07	0.039,0.011	0.308,0.263	-0.26
1032	ENSG00000131051.25	RBM39	chr20	-	35741896	35742238	35741940	35742238	35740823	35740887	1032	11,12	366,564	1,4	83,80	193	149	0.928667	1	0.023,0.016	0.009,0.037	-0.003
1037	ENSG00000244005.14	NFS1	chr20	-	35699191	35699352	35699309	35699352	35698480	35698590	1037	71,36	0,1	6,3	0,0	267	149	1	1	1.0,0.953	1.0,1.0	-0.024
1044	ENSG00000088298.14	EDEM2	chr20	-	35118597	35118719	35118618	35118719	35115363	35115933	1044	67,31	2,0	0,1	0,0	170	149	1	1	0.967,1.0	NA,1.0	-0.016
1053	ENSG00000131069.21	ACSS2	chr20	+	34920538	34920760	34920538	34920709	34921005	34921139	1053	2,0	18,17	3,3	3,0	200	149	7.15281e-05	0.000655004	0.076,0.0	0.427,1.0	-0.675
1055	ENSG00000131067.18	GGT7	chr20	-	34861432	34861562	34861444	34861562	34860253	34860321	1055	0,4	35,17	0,2	2,0	161	149	0.536345	1	0.0,0.179	0.0,1.0	-0.41
1057	ENSG00000100982.13	PCIF1	chr20	+	45937417	45937698	45937417	45937585	45938980	45939060	1057	18,12	38,14	2,1	7,7	262	149	0.0247702	0.0971413	0.212,0.328	0.14,0.075	0.163
1067	ENSG00000125967.18	NECAB3	chr20	-	33674175	33674424	33674223	33674424	33672397	33672422	1067	2,1	14,21	1,2	3,15	197	149	0.719093	1	0.098,0.035	0.201,0.092	-0.08
1072	ENSG00000088325.17	TPX2	chr20	+	31739266	31739621	31739266	31739347	31742540	31742647	1072	323,310	3,0	41,24	0,0	298	149	1	1	0.982,1.0	1.0,1.0	-0.009
1074	ENSG00000088325.17	TPX2	chr20	+	31797403	31797518	31797403	31797515	31798364	31798552	1074	0,0	351,460	1,0	13,16	152	149	1	1	0.0,0.0	0.07,0.0	-0.035
1075	ENSG00000171552.15	BCL2L1	chr20	-	31721654	31722330	31721843	31722330	31664453	31666086	1075	69,56	1,4	6,8	0,0	298	149	0.034704	0.126833	0.972,0.875	1.0,1.0	-0.077
1077	ENSG00000171552.15	BCL2L1	chr20	-	31721732	31722348	31721843	31722348	31664453	31666086	1077	34,31	1,4	4,8	0,0	260	149	0.00892959	0.0412011	0.951,0.816	1.0,1.0	-0.117
1078	ENSG00000171552.15	BCL2L1	chr20	-	31723734	31723960	31723863	31723960	31721843	31722348	1078	5,2	1,2	4,4	0,0	278	149	0.0115255	0.0509245	0.728,0.349	1.0,1.0	-0.462
1098	ENSG00000197586.14	ENTPD6	chr20	+	25217501	25217619	25217501	25217581	25222837	25222978	1098	0,2	2,0	4,0	0,0	187	149	1	1	0.0,1.0	1.0,NA	-0.5
1109	ENSG00000278041.2	ENSG00000278041	chr20	-	21506208	21506405	21506342	21506405	21502170	21502315	1109	5,2	0,1	6,1	0,0	283	149	1	1	1.0,0.513	1.0,1.0	-0.244
1113	ENSG00000188559.17	RALGAPA2	chr20	-	20531686	20531795	20531725	20531795	20526251	20526362	1113	30,19	6,0	11,0	0,0	188	149	1	1	0.798,1.0	1.0,NA	-0.101
1114	ENSG00000132664.14	POLR3F	chr20	+	18467388	18467671	18467388	18467568	18468943	18469061	1114	2,0	13,23	1,1	2,5	252	149	0.560473	1	0.083,0.0	0.228,0.106	-0.126
1117	ENSG00000132664.14	POLR3F	chr20	+	18480037	18480186	18480037	18480181	18480401	18480509	1117	2,0	16,16	0,0	5,4	154	149	0.583291	1	0.108,0.0	0.0,0.0	0.054
1121	ENSG00000125844.18	RRBP1	chr20	-	17614736	17614880	17614739	17614880	17613677	17614220	1121	32,32	0,1	18,9	0,2	152	149	0.799159	1	1.0,0.969	1.0,0.815	0.077
1126	ENSG00000130962.20	PRRG1	chrX	+	37349329	37349543	37349329	37349469	37406208	37406259	1126	0,1	2,9	0,1	0,2	223	149	1	1	0.0,0.069	NA,0.25	-0.215
1138	ENSG00000089195.16	TRMT6	chr20	-	5941932	5942036	5941950	5942036	5941242	5941345	1138	0,4	32,8	0,0	0,2	167	149	1	1	0.0,0.308	NA,0.0	0.154
1139	ENSG00000089195.16	TRMT6	chr20	-	5943826	5944031	5943947	5944031	5943558	5943683	1139	0,1	8,23	4,0	1,3	270	149	0.0354482	0.129184	0.0,0.023	0.688,0.0	-0.332
1143	ENSG00000101290.15	CDS2	chr20	+	5183060	5183178	5183060	5183143	5184857	5184945	1143	0,1	54,54	0,1	7,7	184	149	1	1	0.0,0.015	0.0,0.104	-0.044
1145	ENSG00000125779.24	PANK2	chr20	+	3907925	3908278	3907925	3908135	3910576	3910830	1145	64,59	7,11	25,20	9,10	292	149	0.00677447	0.0326522	0.823,0.732	0.586,0.505	0.232
1158	ENSG00000125877.14	ITPA	chr20	+	3209512	3209617	3209512	3209566	3213168	3213226	1158	44,34	0,0	6,7	0,3	200	149	0.0875711	0.26923	1.0,1.0	1.0,0.635	0.182
1159	ENSG00000125877.14	ITPA	chr20	+	3213318	3213426	3213318	3213383	3213984	3214058	1159	2,2	88,51	2,5	3,8	192	149	4.26137e-05	0.000411672	0.017,0.03	0.341,0.327	-0.31
1160	ENSG00000088899.17	LZTS3	chr20	-	3167661	3167961	3167737	3167961	3166704	3167181	1160	3,2	1,1	3,1	0,2	225	149	0.436219	0.946502	0.665,0.57	1.0,0.249	-0.007
1163	ENSG00000088899.17	LZTS3	chr20	-	3167661	3167961	3167798	3167961	3166704	3167181	1163	4,3	1,0	3,2	0,0	286	149	1	1	0.676,1.0	1.0,1.0	-0.162
1166	ENSG00000088899.17	LZTS3	chr20	-	3167737	3167961	3167798	3167961	3166704	3167181	1166	2,2	1,0	0,3	0,0	210	149	1	1	0.587,1.0	NA,1.0	-0.207
1172	ENSG00000132670.22	PTPRA	chr20	+	3021308	3021431	3021308	3021428	3022053	3022220	1172	1,1	64,38	0,0	3,1	152	149	1	1	0.015,0.025	0.0,0.0	0.02
1173	ENSG00000215305.11	VPS16	chr20	+	2864178	2864293	2864178	2864287	2864364	2864462	1173	0,3	30,33	0,0	7,3	155	149	0.671065	1	0.0,0.08	0.0,0.0	0.04
1176	ENSG00000101365.23	IDH3B	chr20	-	2658637	2658837	2658758	2658837	2658394	2658522	1176	46,50	11,18	17,12	0,0	270	149	7.48545e-07	1.12407e-05	0.698,0.605	1.0,1.0	-0.349
1177	ENSG00000101365.23	IDH3B	chr20	-	2659698	2660176	2660029	2660176	2659524	2659585	1177	82,95	1,0	37,32	0,0	298	149	1	1	0.976,1.0	1.0,1.0	-0.012
1179	ENSG00000101361.18	NOP56	chr20	+	2655933	2656214	2655933	2656034	2656400	2656549	1179	303,209	324,224	65,75	6,6	298	149	0	0	0.319,0.318	0.844,0.862	-0.534
1183	ENSG00000198053.13	SIRPA	chr20	+	1934714	1934766	1934714	1934754	1937319	1939891	1183	5,5	14,15	0,0	0,1	161	149	1	1	0.248,0.236	NA,0.0	0.242
1184	ENSG00000198053.13	SIRPA	chr20	+	1934714	1934832	1934714	1934754	1937319	1939891	1184	1,5	14,15	0,0	0,1	227	149	1	1	0.045,0.18	NA,0.0	0.112
1192	ENSG00000099326.10	MZF1	chr19	-	58570343	58571429	58570993	58571429	58569515	58569586	1192	23,17	0,0	29,31	0,2	298	149	0.589254	1	1.0,1.0	1.0,0.886	0.057
1193	ENSG00000099326.10	MZF1	chr19	-	58570993	58571429	58571161	58571429	58570343	58570527	1193	34,17	15,0	9,18	0,0	298	149	0.000235602	0.00184067	0.531,1.0	1.0,1.0	-0.234
1195	ENSG00000130726.13	TRIM28	chr19	+	58547596	58547713	58547596	58547702	58547791	58547906	1195	1218,936	1,0	48,78	0,0	160	149	1	1	0.999,1.0	1.0,1.0	0
1208	ENSG00000160285.16	LSS	chr21	-	46222629	46222738	46222662	46222738	46221853	46221975	1208	154,60	11,2	44,35	2,6	182	149	0.445983	0.952832	0.92,0.961	0.947,0.827	0.053
1211	ENSG00000178935.5	ZNF552	chr19	-	57814532	57814913	57814710	57814913	57813293	57813420	1211	13,15	17,6	4,10	8,5	298	149	0.675055	1	0.277,0.556	0.2,0.5	0.067
1222	ENSG00000063245.16	EPN1	chr19	+	55675970	55676060	55675970	55676054	55678526	55678855	1222	0,0	3,0	1,0	0,0	155	149	1	1	0.0,NA	1.0,NA	-1
1223	ENSG00000063245.16	EPN1	chr19	+	55677549	55677734	55677549	55677581	55678526	55678855	1223	1,3	1,2	3,13	6,0	298	149	0.24469	0.6188	0.333,0.429	0.2,1.0	-0.219
1225	ENSG00000063245.16	EPN1	chr19	+	55678526	55678855	55678526	55678696	55685395	55685645	1225	562,446	2,0	79,69	0,0	298	149	1	1	0.993,1.0	1.0,1.0	-0.004
1231	ENSG00000160469.17	BRSK1	chr19	+	55287213	55287303	55287213	55287299	55289479	55289620	1231	3,4	15,18	3,1	6,6	153	149	0.836324	1	0.163,0.178	0.327,0.14	-0.063
1233	ENSG00000133265.12	HSPBP1	chr19	-	55279929	55280108	55280034	55280108	55279398	55279702	1233	8,5	41,87	0,5	2,4	254	149	0.182227	0.491707	0.103,0.033	0.0,0.423	-0.143
1234	ENSG00000105063.20	PPP6R1	chr19	-	55242369	55242488	55242375	55242488	55242165	55242279	1234	2,1	195,186	0,0	50,50	155	149	1	1	0.01,0.005	0.0,0.0	0.007
1236	ENSG00000167646.15	DNAAF3	chr19	-	55165781	55166000	55165857	55166000	55165369	55165463	1236	0,0	4,0	0,2	0,0	225	149	1	1	0.0,NA	NA,1.0	-1
1248	ENSG00000170889.15	RPS9	chr19	+	54200855	54200893	54200855	54200888	54201159	54201281	1248	49,23	416,298	3,4	16,26	154	149	0.909592	1	0.102,0.069	0.154,0.13	-0.057
1250	ENSG00000170889.15	RPS9	chr19	+	54200857	54200961	54200857	54200888	54201159	54201281	1250	3,1	416,298	0,0	16,26	222	149	1	1	0.005,0.002	0.0,0.0	0.004
1252	ENSG00000170889.15	RPS9	chr19	+	54200857	54200961	54200857	54200893	54201159	54201281	1252	3,1	49,23	0,0	3,4	217	149	0.52123	1	0.04,0.029	0.0,0.0	0.035
1258	ENSG00000170889.15	RPS9	chr19	+	54206275	54206724	54206275	54206462	54207397	54207644	1258	82,81	1728,1152	25,49	18,18	298	149	0	0	0.023,0.034	0.41,0.576	-0.464
1259	ENSG00000105619.15	TFPT	chr19	-	54114437	54114700	54114441	54114700	54110050	54110121	1259	1,0	7,15	2,0	2,2	153	149	0.532694	1	0.122,0.0	0.493,0.0	-0.185
1260	ENSG00000170906.17	NDUFA3	chr19	+	54102868	54102898	54102868	54102888	54103113	54103188	1260	2,2	56,91	0,0	24,20	159	149	0.59644	1	0.032,0.02	0.0,0.0	0.026
1277	ENSG00000204611.8	ZNF616	chr19	-	52139214	52139626	52139454	52139626	52130500	52130588	1277	2,4	0,1	2,2	0,0	298	149	1	1	1.0,0.667	1.0,1.0	-0.166
1278	ENSG00000185513.18	L3MBTL1	chr20	+	43530283	43530889	43530283	43530419	43532772	43532924	1278	3,2	1,0	19,13	0,2	298	149	0.729331	1	0.6,1.0	1.0,0.765	-0.083
1282	ENSG00000176024.19	ZNF613	chr19	+	51929731	51929896	51929731	51929824	51936027	51936235	1282	21,11	2,0	3,2	0,0	221	149	0.548771	1	0.876,1.0	1.0,1.0	-0.062
1285	ENSG00000198093.12	ZNF649	chr19	-	51899797	51900294	51900092	51900294	51896851	51896978	1285	4,4	18,20	3,9	10,4	298	149	0.0467577	0.1626	0.1,0.091	0.13,0.529	-0.234
1297	ENSG00000062822.17	POLD1	chr19	+	50409518	50409666	50409518	50409594	50413425	50413521	1297	149,119	8,4	30,40	2,5	221	149	0.252576	0.634269	0.926,0.953	0.91,0.844	0.062
1300	ENSG00000062822.17	POLD1	chr19	+	50415437	50415602	50415437	50415590	50415723	50415826	1300	0,4	134,80	1,4	9,14	161	149	0.00758629	0.0358142	0.0,0.044	0.093,0.209	-0.129
1301	ENSG00000062822.17	POLD1	chr19	+	50415723	50416528	50415723	50415826	50416609	50416723	1301	98,84	0,2	58,65	0,0	298	149	0.637805	1	1.0,0.955	1.0,1.0	-0.022
1302	ENSG00000131408.16	NR1H2	chr19	+	50376718	50376876	50376718	50376826	50377586	50377648	1302	1,0	32,20	0,5	4,13	199	149	0.00576827	0.0285232	0.023,0.0	0.0,0.224	-0.101
1313	ENSG00000105053.12	VRK3	chr19	-	50020461	50020647	50020584	50020647	50016023	50016163	1313	2,4	89,72	1,1	23,28	272	149	0.497782	1	0.012,0.03	0.023,0.019	0
1314	ENSG00000105053.12	VRK3	chr19	-	50025266	50025372	50025345	50025372	50020584	50020647	1314	10,8	29,26	1,3	13,8	228	149	0.14178	0.399703	0.184,0.167	0.048,0.197	0.053
1316	ENSG00000213024.14	NUP62	chr19	-	49929325	49929475	49929349	49929475	49927693	49927815	1316	23,33	0,1	2,2	0,0	173	149	1	1	1.0,0.966	1.0,1.0	-0.017
1317	ENSG00000213024.14	NUP62	chr19	-	49929325	49929475	49929416	49929475	49927693	49927815	1317	27,37	2,0	5,4	0,0	240	149	0.660397	1	0.893,1.0	1.0,1.0	-0.053
1318	ENSG00000213024.14	NUP62	chr19	-	49929349	49929475	49929416	49929475	49927693	49927815	1318	4,5	2,0	3,2	0,0	216	149	0.52528	1	0.58,1.0	1.0,1.0	-0.21
1319	ENSG00000213024.14	NUP62	chr19	-	49929325	49929496	49929349	49929496	49927693	49927848	1319	23,23	0,0	1,0	0,2	173	149	0.0946717	0.287375	1.0,1.0	1.0,0.0	0.5
1323	ENSG00000104946.15	TBC1D17	chr19	+	49882241	49882400	49882241	49882388	49882763	49882892	1323	42,10	0,0	6,14	0,1	161	149	1	1	1.0,1.0	1.0,0.928	0.036
1325	ENSG00000204673.12	AKT1S1	chr19	-	49871525	49871716	49871546	49871716	49869038	49870060	1325	2,0	324,172	1,0	11,0	170	149	1	1	0.005,0.0	0.074,NA	-0.071
1326	ENSG00000039650.13	PNKP	chr19	-	49861607	49861881	49861771	49861881	49861448	49861510	1326	46,37	0,1	62,48	0,0	298	149	1	1	1.0,0.949	1.0,1.0	-0.026
[truncated: 8,548 more rows]

## Sheet: Control_MXE.MATS_JC
ID...1	GeneID	geneSymbol	chr	strand	1stExonStart_0base	1stExonEnd	2ndExonStart_0base	2ndExonEnd	upstreamES	upstreamEE	downstreamES	downstreamEE	ID...14	IJC_SAMPLE_1	SJC_SAMPLE_1	IJC_SAMPLE_2	SJC_SAMPLE_2	IncFormLen	SkipFormLen	PValue	FDR	IncLevel1	IncLevel2	IncLevelDifference
[truncated: 11,275 more rows]

[truncated: 19 more sheets: Control_RI.MATS_JC, Control_SE.MATS_JC, Control_A3SS.MATS_JCEC, Control_A5SS.MATS_JCEC, Control_MXE.MATS_JCEC, Control_RI.MATS_JCEC, Control_SE.MATS_JCEC, Control_summary, OSCHX_A3SS.MATS_JC, OSCHX_A5SS.MATS_JC, OSCHX_MXE.MATS_JC, OSCHX_RI.MATS_JC, OSCHX_SE.MATS_JC, OSCHX_A3SS.MATS_JCEC, OSCHX_A5SS.MATS_JCEC, OSCHX_MXE.MATS_JCEC, OSCHX_RI.MATS_JCEC, OSCHX_SE.MATS_JCEC, OSCHX_summary]
