# Supplementary material
Source: HighWire-hosted journal article supplement (doi:10.1101/rna.081061.126)
Supplement: Supplemental_Table_S5.xlsx [file Supplemental_Table_S5.xlsx]

## Sheet: Sheet1
Primer_name	Sequence (5' -> 3')	Usage	Source
18S_fw	ATTAATCAAGAACGAAAGTCCCAGGT	qPCR	10.15252/embj.201695848
18S_rv	TTTAAGTTTCAGCTTTGCAACCATACT	qPCR	10.15252/embj.201695848
GAPDH_fw	ATGAGAAGTATGACAACAGCCTCAAGAT	qPCR	10.15252/embj.201695848
GAPDH_rv	ATGAGTCCTTCCACGATACCAAAGTT	qPCR	10.15252/embj.201695848
NEAT1_fw_12	TGTGTGTGTAAAAGAGAGAAGTTGTGG	qPCR	10.15252/embj.201695848
NEAT1_rv_12	AGAGGCTCAGAGAGGACTGTAACCTG	qPCR	10.15252/embj.201695848
PVT1_ex5In5_fw	AGCACTCTGGACGGACTTG	qPCR	10.15252/embj.201695848
PVT1_ex5In5_rv	CTGCAGGAGGTCGTCAACT	qPCR	10.15252/embj.201695848
MALAT1_fw	GATAATCAGACCACCACAGGTTTACAG	qPCR	10.15252/embj.201695848
MALAT1_rv	AAAGAGTAACTACCAGCCATTTCTCCA	qPCR	10.15252/embj.201695848
doSRSF1#1_fw	CCGAGGTTACTTGCCAGGTT	qPCR	10.1261/rna .079469.122
doSRSF1#1_rv	TTTGGCTCGGCTATCGAGTG	qPCR	10.1261/rna .079469.122
do FUS#2_fw	GGCTAGGAGCAGAATCGTCTT	qPCR	this study
do FUS#2_rv	CATCCCCTAACAGCAACTGG	qPCR	this study
do FUS#3_fw	TCACAGTGCCTGAGTGATGG	qPCR	this study
do FUS#3_rv	CAGCAGGGATGTTGACCCAA	qPCR	this study
FUS_Ex6_Ex8/9_fw	TCCTCCATGAGTAGTGGTGGT	qPCR	this study
FUS_Ex6_Ex8/9_rv	GTCTGAATTATCCTGTTCGGAGTC	qPCR	this study
FUS_Ex7_Int7_fw	GTGACCGTGGTGGCTTCAATAA	qPCR	this study
FUS_Ex7_Int7_rv	TTGCTGGGAGTTGGGAATTTTG	qPCR	this study
cypridina_luciferase_fw	ACCATCGGCGAAGTGACAAT	qPCR	this study
cypridina_luciferase_rv	CGCTGATCATGCCCTTGTTG	qPCR	this study
cypridinaLuc1FW+T7	cgactcactatagggATGAAGACCCTGATCCTGGC	cloning	this study
cypridinaLuc1FW+T7+EcoRI	GAATTCtaatacgactcactatagggATGAAGACC	cloning	this study
cypridinaLuc1000RV+A#1	ttttttttttttttGGTATCTGGCCTTGTCGAAGG	cloning	this study
cypridinaLuc1000RV+A#2	ttttttttttttttttttttttttttttttGGTATCTGGC	cloning	this study
